# Supplementary material for: T cell-mediated SIV dissemination into the CNS: a single-cell transcriptomic analysis
Source: Research Square preprint supplement (doi:10.21203/rs.3.rs-6537361/v1), 2025-05-09
Supplement: Supplementary file 1 [file 02e65b513874f82428e7ab3a.xlsx]

## Sheet: NoCoCul_vs_NoApop
gene	logFC	logCPM	F	p_val	p_adj
IER3	2.05656	8.6633	723.323	1.16e-11	1.48e-07
CXCL3	2.91359	7.45926	541.231	5.9e-11	2.7e-07
CCL4	4.07024	8.70659	534.126	6.35e-11	2.7e-07
NFKBIA	1.90232	8.73501	504.703	8.71e-11	2.78e-07
NFKBIZ	2.20324	6.76581	391.309	3.59e-10	7.03e-07
CCL3	3.10455	8.78592	376.938	4.41e-10	7.03e-07
CCL4L2	4.23784	8.14424	401.635	3.1e-10	7.03e-07
MIR155HG	3.51232	6.07231	385.411	3.9e-10	7.03e-07
CXCL2	2.48654	7.60069	368.488	5e-10	7.08e-07
KMO	1.97883	6.86552	322.856	1.04e-09	1.21e-06
ZFP36	2.01186	7.92583	322.414	1.05e-09	1.21e-06
CXCL1	3.55142	5.73988	305.39	1.41e-09	1.5e-06
ID2	1.71584	7.8262	293.209	1.76e-09	1.73e-06
KLF10	1.59467	6.63709	277.853	2.37e-09	2.01e-06
GADD45B	2.43298	7.65466	281.149	2.22e-09	2.01e-06
TNFAIP6	5.84057	4.35345	258.687	3.5e-09	2.35e-06
SERPINE1	3.3538	5.80025	258.651	3.51e-09	2.35e-06
DDIT4	1.37999	7.5661	262.278	3.25e-09	2.35e-06
SDC4	2.15495	6.08419	263.644	3.16e-09	2.35e-06
GCH1	1.79182	6.24717	244.32	4.79e-09	3.05e-06
HES1	1.87502	6.29095	239.243	5.37e-09	3.26e-06
JUNB	1.31501	8.18511	231.73	6.39e-09	3.7e-06
DUSP2	2.15629	7.66872	227.202	7.11e-09	3.94e-06
CCL2	2.11614	8.36758	218.932	8.7e-09	4.62e-06
PPP1R15A	1.94766	7.67712	215.521	9.48e-09	4.83e-06
TNFSF9	2.52927	5.91375	208.426	1.14e-08	5.39e-06
DNAJB1	2.30806	8.36491	208.265	1.14e-08	5.39e-06
TNFAIP3	2.053	7.09854	202.207	1.34e-08	6e-06
BAG3	2.136	6.99184	201.507	1.36e-08	6e-06
CCL3L3	3.8426	7.91713	198.723	1.47e-08	6.25e-06
ACSL1	1.53099	7.54544	197.021	1.54e-08	6.34e-06
SOD2	1.3171	8.43105	193.387	1.7e-08	6.79e-06
CXCL8	3.80447	8.06137	191.284	1.81e-08	6.98e-06
IER5	1.77319	6.71908	178.303	2.64e-08	9.9e-06
MMP2-AS1	2.25682	6.06331	175.668	2.86e-08	9.99e-06
IRF8	1.71445	6.78203	175.222	2.9e-08	9.99e-06
SOCS3	2.67511	5.03148	176.297	2.8e-08	9.99e-06
BHLHE40	1.92176	6.81763	173.778	3.03e-08	1.02e-05
TNF	3.33717	6.33349	168.783	3.54e-08	1.16e-05
TRAF1	3.58567	5.53606	165.603	3.92e-08	1.25e-05
PDE4B	2.14849	6.20119	160.707	4.61e-08	1.43e-05
HBEGF	1.91409	5.82646	157.58	5.12e-08	1.55e-05
LINC01222	-1.39762	4.78193	153.231	5.94e-08	1.76e-05
MXD1	1.52313	6.68425	151.726	6.26e-08	1.76e-05
TLR2	1.42856	6.79922	151.381	6.34e-08	1.76e-05
ATP1A3	1.6774	5.6745	152.489	6.09e-08	1.76e-05
ANKRD33B	1.80055	5.11907	149.954	6.66e-08	1.79e-05
NR4A1	3.42322	6.49898	149.63	6.74e-08	1.79e-05
MAP3K8	1.26271	6.76516	148.368	7.05e-08	1.83e-05
RNF144B	2.04612	6.39394	146.497	7.54e-08	1.92e-05
RELB	1.84827	6.59303	145.137	7.93e-08	1.98e-05
HSPH1	1.36907	8.21823	142.753	8.65e-08	2.12e-05
TSPYL2	1.7585	6.12087	141.538	9.06e-08	2.18e-05
APOLD1	-1.19713	5.0138	138.846	1e-07	2.37e-05
IER2	0.981374	8.35307	137.282	1.06e-07	2.47e-05
SNAP25-AS1	3.32315	3.74929	132.968	1.26e-07	2.87e-05
ICAM1	2.48038	7.39102	128.699	1.5e-07	3.35e-05
RNF19B	1.38069	5.76615	127.605	1.57e-07	3.38e-05
JUN	1.1966	8.21933	127.766	1.55e-07	3.38e-05
PIM3	1.25808	7.12463	127.184	1.59e-07	3.38e-05
LINC01934	-0.771717	6.19799	126.117	1.66e-07	3.48e-05
RARRES1	0.966753	7.40309	125.247	1.73e-07	3.49e-05
RND1	3.1539	3.93122	125.519	1.71e-07	3.49e-05
HMGCS1	1.36736	6.5736	123.735	1.84e-07	3.51e-05
IFRD1	1.08915	6.29286	124.404	1.79e-07	3.51e-05
MAILR	1.99623	6.67412	123.67	1.85e-07	3.51e-05
ID1	1.42064	5.99532	123.825	1.83e-07	3.51e-05
GPR137C	1.26463	6.64218	122.829	1.91e-07	3.59e-05
BTG2	1.77446	7.78246	122.344	1.95e-07	3.61e-05
XRCC2	-0.932803	5.38805	121.328	2.04e-07	3.68e-05
CLEC4E	2.00507	5.36672	121.238	2.05e-07	3.68e-05
IL1B	5.28061	6.8834	118.854	2.27e-07	4.02e-05
ATP6V0D1-DT	-1.25193	4.28651	118.441	2.31e-07	4.04e-05
ZFAND2A	1.73846	6.32551	117.153	2.45e-07	4.22e-05
PDGFB	2.26738	4.47378	115.676	2.62e-07	4.45e-05
MIR223HG	-1.65941	3.70653	114.06	2.82e-07	4.73e-05
DUSP1	1.80511	7.3956	113.265	2.92e-07	4.84e-05
CCL8	2.82977	5.77981	112.371	3.04e-07	4.98e-05
CD83	1.44476	8.16535	111.659	3.15e-07	5.05e-05
USPL1	1.31426	6.91312	111.508	3.17e-07	5.05e-05
NOTCH2NLC	1.52278	5.51342	109.911	3.42e-07	5.17e-05
HSPA6	4.23059	7.28082	109.156	3.54e-07	5.17e-05
IL1A	4.2737	4.1571	109.527	3.48e-07	5.17e-05
FHIP1A	2.57096	4.22391	110.259	3.36e-07	5.17e-05
PHACTR1	1.31801	6.68165	109.568	3.47e-07	5.17e-05
ARC	4.99905	3.39225	109.338	3.51e-07	5.17e-05
B4GALT1	1.11596	7.24519	109.469	3.49e-07	5.17e-05
TMPRSS9	2.79006	3.80436	109.005	3.57e-07	5.17e-05
MIR142HG	-1.24614	6.0484	107.893	3.76e-07	5.33e-05
SERTAD1	1.53075	6.33979	108.082	3.73e-07	5.33e-05
WTAP	0.809606	7.88575	107.197	3.89e-07	5.45e-05
ENSG00000240963	-1.27575	3.93533	106.776	3.97e-07	5.5e-05
NPPC	3.59837	3.90638	106.476	4.03e-07	5.52e-05
SKIL	1.62977	6.29372	106.022	4.12e-07	5.59e-05
FOS	1.16815	7.75737	105.236	4.28e-07	5.68e-05
BCL3	1.91826	5.77819	105.246	4.28e-07	5.68e-05
HSP90AA1	0.560353	9.49653	104.717	4.39e-07	5.77e-05
CLIC4	0.863792	7.64737	104.252	4.49e-07	5.85e-05
H3C2	-0.939465	5.17202	102.073	5.01e-07	6.45e-05
FAM241A	1.26633	6.17762	100.085	5.55e-07	7.07e-05
IRAK3	1.07437	6.48212	98.6122	5.99e-07	7.56e-05
RPL34-DT	-1.03027	4.71413	96.959	6.53e-07	8.08e-05
SLC2A6	1.34525	5.23442	97.0976	6.48e-07	8.08e-05
CCL20	5.96129	3.50093	95.5765	7.03e-07	8.34e-05
CD96	-0.718785	6.5017	95.494	7.06e-07	8.34e-05
SLC25A25	0.936345	6.51303	95.5024	7.06e-07	8.34e-05
KLF5	3.0711	3.67999	95.6419	7.01e-07	8.34e-05
LIMASI	2.56708	4.08529	95.7401	6.97e-07	8.34e-05
IFNGR2	0.771083	7.43716	95.2167	7.17e-07	8.38e-05
ZC3H12A	2.72567	5.12866	94.2831	7.54e-07	8.73e-05
ADM	2.69528	4.82556	94.1284	7.6e-07	8.73e-05
DUSP5	3.93638	4.53456	93.9505	7.68e-07	8.74e-05
PHLDB3	1.65706	5.43801	92.9796	8.1e-07	9.13e-05
NFKB1	1.54329	8.07673	91.3853	8.85e-07	9.89e-05
C11orf96	1.94863	4.4105	91.1179	8.98e-07	9.95e-05
GDF15	1.22165	6.60509	90.3146	9.39e-07	0.000103234
C8orf44	-1.00467	4.60946	89.9015	9.62e-07	0.000104773
HCK	0.753452	7.36198	89.7003	9.73e-07	0.000105079
NDST3	-0.624492	7.00625	89.324	9.94e-07	0.000106452
LINC02731	3.95823	3.20333	89.0499	1.01e-06	0.000107231
HSPA1B	3.76721	8.00402	87.4647	1.11e-06	0.000115569
MARCKS	0.558542	8.67222	87.5027	1.1e-06	0.000115569
MARCHF3	2.21364	4.86014	86.2494	1.19e-06	0.000123076
MIR181A1HG	-0.636272	7.98816	85.2347	1.26e-06	0.000129639
PLK3	1.72977	5.62296	84.8428	1.29e-06	0.000131641
TXNDC16	1.2479	6.17355	84.6908	1.3e-06	0.000131789
TAPT1-AS1	-1.21161	4.39368	84.0607	1.35e-06	0.00013439
TNFRSF10B	1.02222	6.04531	84.0843	1.35e-06	0.00013439
RIPK2	1.30442	6.60281	83.9736	1.36e-06	0.00013439
RGS16	3.94434	4.02725	83.2342	1.42e-06	0.000139
H1-5	-0.668621	7.16739	83.1624	1.43e-06	0.000139
UAP1	1.20801	5.58851	82.3876	1.5e-06	0.000144631
PCAT18	-0.92808	5.46624	82.137	1.52e-06	0.000145769
AZIN1	0.822058	6.76	81.8404	1.55e-06	0.000147348
GEM	2.32853	4.38857	81.6275	1.57e-06	0.000148192
TAMALIN	2.25109	4.6308	81.1158	1.62e-06	0.000151844
NINJ1	0.806669	7.49897	80.9024	1.64e-06	0.000152751
DRAM1	1.15312	7.38401	80.7582	1.66e-06	0.000153014
RASD1	3.81409	4.08929	80.132	1.72e-06	0.00015799
CHORDC1	0.786253	7.36958	79.5553	1.79e-06	0.000162669
BIRC3	1.46425	6.43313	79.3029	1.82e-06	0.000163607
TSHR	-0.804625	5.42515	79.2407	1.82e-06	0.000163607
CDC42EP3	0.852475	7.01982	79.0696	1.84e-06	0.000164238
PLEK	1.03106	8.33891	78.692	1.89e-06	0.00016707
LINC02789	-1.13248	4.06283	78.2949	1.94e-06	0.000168896
IRAK2	3.44409	6.02468	78.2392	1.94e-06	0.000168896
CCDC194	2.23529	3.65265	78.2003	1.95e-06	0.000168896
HLA-L	1.74374	4.95501	77.9882	1.97e-06	0.000170058
DGKE	1.15774	6.4415	77.765	2e-06	0.000171364
MARCHF1	-0.725013	6.29133	77.5922	2.03e-06	0.000172132
GYS1	1.25377	5.96343	77.3802	2.05e-06	0.000173355
CD44	0.712696	7.91032	77.2766	2.07e-06	0.000173377
SATB1-AS1	-0.802912	5.65693	77.0552	2.1e-06	0.000174739
GBP2	1.08027	5.76528	76.7136	2.14e-06	0.000177513
NAMPT	1.82531	8.0315	76.59	2.16e-06	0.000177798
SGPP2	5.84658	5.18853	76.4086	2.19e-06	0.000178769
CD80	2.72043	4.60612	76.1682	2.22e-06	0.000180455
ENSG00000291015	-0.788752	5.64544	75.8363	2.27e-06	0.000183276
SLC6A20	-0.920987	4.54686	75.0222	2.4e-06	0.000188662
MGLL	0.994399	7.73716	75.1582	2.38e-06	0.000188662
IRAK1BP1	-0.726921	5.89577	75.1017	2.38e-06	0.000188662
ENSG00000286887	2.02511	3.98397	75.1435	2.38e-06	0.000188662
EGR1	2.4667	7.1579	74.5623	2.47e-06	0.000192833
PSTPIP2	2.06933	5.93163	74.5113	2.48e-06	0.000192833
DEPP1	3.29357	4.28073	74.2545	2.52e-06	0.000193568
CRY1	1.21916	6.63725	74.3043	2.52e-06	0.000193568
CCL5	2.19026	3.89439	74.1847	2.54e-06	0.000193568
ARPP21	-0.625963	6.95432	73.7148	2.62e-06	0.000198611
H2BC11	1.87238	3.94297	73.1518	2.72e-06	0.000205126
SLC12A2	1.10868	6.11514	72.9938	2.75e-06	0.000206129
LINC02987	-0.827679	5.13939	72.7171	2.8e-06	0.000208835
ENSG00000289944	3.06812	4.11496	72.4358	2.86e-06	0.000211665
FOSL1	3.13652	3.61944	71.6045	3.02e-06	0.000222871
AMPD3	1.06014	6.36362	70.9994	3.15e-06	0.00023027
LACC1	0.900891	6.61267	70.9707	3.16e-06	0.00023027
EXO5-DT	-1.64419	3.24024	70.7986	3.2e-06	0.000231736
RASGEF1B	1.76808	7.48304	70.5192	3.26e-06	0.000234929
NCF1B	2.75811	3.30935	70.3633	3.3e-06	0.000234929
JAG1	2.52957	3.95421	70.435	3.28e-06	0.000234929
SLC43A2	1.4609	6.38761	70.2688	3.32e-06	0.000235186
LINC01221	-1.73936	3.54256	69.4167	3.53e-06	0.000248454
MIR23AHG	1.85165	5.01637	69.2573	3.57e-06	0.000248552
MT-ND6	-0.843184	5.18188	69.2925	3.56e-06	0.000248552
F3	2.7561	4.24914	68.6626	3.72e-06	0.00025797
SERPINH1	2.87006	5.58534	68.5214	3.76e-06	0.000259197
RGS2	1.07079	5.78418	68.3757	3.8e-06	0.000260529
TNFAIP2	0.591524	8.30805	68.2264	3.84e-06	0.000261948
SLC41A1	1.08764	5.28166	68.0075	3.9e-06	0.000263322
NFKB2	1.36728	5.91329	68.0209	3.9e-06	0.000263322
ABHD3	0.986727	7.61414	67.4059	4.08e-06	0.000273672
REL	0.914705	7.64476	66.8448	4.25e-06	0.000280745
TMEM72-AS1	-1.27301	3.98034	66.8755	4.24e-06	0.000280745
FCAR	2.4387	3.5138	66.9019	4.23e-06	0.000280745
EIF2AK3	1.1106	6.12306	66.5956	4.33e-06	0.00028448
ENSG00000253926	-2.17129	2.34046	66.0403	4.51e-06	0.000294924
ENSG00000261889	2.73125	4.13721	65.6003	4.66e-06	0.000303219
ENSG00000256988	-1.1438	4.2904	65.4049	4.73e-06	0.000306131
HUNK	0.899188	5.48179	65.1407	4.83e-06	0.000310697
ZNF823	1.35309	5.10265	64.897	4.92e-06	0.000314872
MCL1	0.785997	7.07926	64.6953	4.99e-06	0.000315007
PNRC1	0.568557	8.44628	64.796	4.95e-06	0.000315007
ERN1	0.838478	6.30281	64.6936	4.99e-06	0.000315007
BCL6	0.977859	6.23652	64.4989	5.07e-06	0.000318121
MTRF1L	0.83238	6.09117	64.1958	5.18e-06	0.000322909
DNAJB6	0.671917	7.51874	64.174	5.19e-06	0.000322909
TICAM1	0.886539	5.44358	63.9314	5.29e-06	0.000327355
CCDC134	1.10961	5.95807	63.8235	5.33e-06	0.000328477
PSAT1	-0.607929	6.12049	63.1803	5.6e-06	0.000341854
PLAU	1.55633	7.42284	63.1919	5.6e-06	0.000341854
FBXO31	1.34679	5.22858	62.9128	5.72e-06	0.000347351
XBP1	0.708419	6.94126	62.5675	5.88e-06	0.00035512
LINC01004	-0.608155	6.20139	62.3465	5.98e-06	0.0003596
HEY1	2.92512	3.27769	67.8593	6.1e-06	0.000364845
ZNF33B	-0.779738	5.17346	61.8031	6.24e-06	0.000371767
CD58	0.820585	7.34669	61.4636	6.41e-06	0.000380099
ECD	0.781206	6.61655	61.1804	6.56e-06	0.000386938
FADS3	1.06653	5.63159	60.9396	6.68e-06	0.00039077
SLC30A4-AS1	3.42417	3.86757	60.8836	6.71e-06	0.00039077
ZNF442	2.06371	3.79156	60.9491	6.68e-06	0.00039077
ENSG00000226149	-0.997302	4.18483	60.6895	6.82e-06	0.000395076
TRIP10	1.03531	4.98967	60.8461	6.87e-06	0.000396271
HES5	4.60777	3.44826	60.3497	7.01e-06	0.00040234
ENSG00000286162	-1.16722	4.59516	60.2894	7.04e-06	0.000402486
MCOLN2	1.74601	3.8728	63.7319	7.26e-06	0.000409609
ZRANB3	-0.618177	5.84274	59.9252	7.25e-06	0.000409609
MCTP1	0.758856	7.77613	59.9814	7.22e-06	0.000409609
LZTFL1	-0.53639	7.04434	59.5778	7.46e-06	0.000416991
BAMBI	3.06686	3.51116	59.6049	7.44e-06	0.000416991
ATF3	1.46144	7.23741	59.2981	7.63e-06	0.000424742
RUNX3	0.957595	6.23741	58.6155	8.07e-06	0.000447262
SLAMF7	0.750266	6.57393	58.4815	8.16e-06	0.000449243
ENSG00000241666	-2.85911	1.72248	58.4571	8.18e-06	0.000449243
GPR89A	0.883842	5.39561	58.0652	8.45e-06	0.000452619
GXYLT2	-0.582829	6.78216	58.2397	8.32e-06	0.000452619
FAM13A	-1.05779	5.48918	58.0497	8.46e-06	0.000452619
H3C12	-1.26799	3.56423	59.2364	8.49e-06	0.000452619
MSH5	-0.821657	5.10121	58.0158	8.48e-06	0.000452619
NBN	0.631071	7.22908	58.1204	8.41e-06	0.000452619
CEMIP2	0.993694	6.08122	58.27	8.3e-06	0.000452619
PTGS2	3.1544	3.87292	57.9412	8.53e-06	0.00045326
ENSG00000287494	1.77607	4.06099	57.6325	8.76e-06	0.000463162
DMXL2	0.537895	7.82466	57.1476	9.12e-06	0.000480414
EAF2	0.769628	5.95022	56.9573	9.27e-06	0.000486183
ETV3	1.20283	5.8185	56.8008	9.39e-06	0.000490643
CSF1	1.4939	6.01284	56.7517	9.43e-06	0.000490677
PTX3	3.7818	5.42361	56.5359	9.6e-06	0.000497718
MKRN3	-0.755005	5.45805	56.2917	9.81e-06	0.000502059
RFLNB	-0.950278	5.46024	56.3824	9.73e-06	0.000502059
ANGPTL4	3.3979	4.18904	56.3113	9.79e-06	0.000502059
CMKLR1	1.21293	5.50629	56.2004	9.88e-06	0.000503964
KLF6	0.806893	7.98798	56.1217	9.95e-06	0.000504891
BRCA1	-0.495889	6.61178	56.0858	9.98e-06	0.000504891
ADAM7-AS1	1.67102	4.10654	55.6858	1.03e-05	0.000520467
HIVEP1	1.25565	7.28872	55.2648	1.07e-05	0.000537628
TCEAL9	0.662528	6.63358	55.1458	1.08e-05	0.000541073
CCDC18-AS1	-0.608479	6.20638	54.7834	1.12e-05	0.000554611
FRMD6	1.92969	4.44637	54.7724	1.12e-05	0.000554611
ASTL	4.16911	4.2132	54.7066	1.12e-05	0.000555646
MAPK6	0.701464	6.70568	54.571	1.14e-05	0.000560108
TPRA1	0.642446	6.44741	54.3746	1.16e-05	0.000565482
GPR183	1.51416	6.69127	54.4051	1.15e-05	0.000565482
SLC2A3	0.682476	6.72967	54.0791	1.19e-05	0.000578177
STX11	1.57529	5.70603	53.8882	1.21e-05	0.000583562
NFKBID	1.52129	6.47508	53.9146	1.21e-05	0.000583562
HEXIM2-AS1	-1.21583	3.55877	53.5334	1.25e-05	0.000597716
TFAP2C	1.18289	4.64197	58.5857	1.25e-05	0.000597716
NMD3	0.79959	5.92167	53.3314	1.27e-05	0.000605335
PRDM1	1.60316	6.35224	53.3073	1.27e-05	0.000605335
LMTK2	0.971404	5.91839	53.2112	1.28e-05	0.000608291
ACVR2A	1.78494	6.46949	53.0731	1.3e-05	0.000613584
ENSG00000274422	-0.794614	5.4286	52.9298	1.32e-05	0.000619239
LYN	1.10256	7.70066	52.7997	1.33e-05	0.000620814
VLDLR-AS1	-1.19313	3.65401	52.7972	1.33e-05	0.000620814
RAB20	0.912228	6.66674	52.7792	1.33e-05	0.000620814
SNAI1	4.32145	3.54295	52.7023	1.34e-05	0.000622857
MAL	0.80021	5.7483	52.5094	1.37e-05	0.000631512
PRKCQ	-0.592521	6.26356	52.1678	1.41e-05	0.000647136
OPTN	0.687563	6.82005	52.1453	1.41e-05	0.000647136
GTPBP1	0.815487	5.55933	52.1211	1.42e-05	0.000647136
METRN	-0.847025	5.25433	51.8704	1.45e-05	0.000659743
ZFP14	-0.70216	5.44964	51.7222	1.47e-05	0.000666374
KCNMB4	0.915955	5.56617	51.6439	1.48e-05	0.000668797
DDX3Y	0.767806	6.04079	51.5039	1.5e-05	0.000675061
C15orf48	1.47263	6.04618	51.287	1.53e-05	0.000686262
S1PR3	1.14179	4.93398	51.0684	1.56e-05	0.000697813
ENSG00000207751	-1.0161	4.55581	50.902	1.58e-05	0.000706189
NFE2L2	0.670686	8.21565	50.6979	1.61e-05	0.000717221
FAM83D	1.18371	4.86979	50.5778	1.63e-05	0.000720823
UPRT	0.857043	5.27936	50.5697	1.63e-05	0.000720823
SLC16A1-AS1	-0.6265	6.09099	50.4645	1.65e-05	0.000723666
JAM3	1.1289	6.23355	50.4538	1.65e-05	0.000723666
GABPB1-AS1	-0.597562	6.05758	50.2345	1.69e-05	0.000736169
ZNF302	-0.755946	5.29375	50.0943	1.71e-05	0.000743387
CCDC18	-0.482205	6.45442	50.0002	1.72e-05	0.000747457
GRHL1	1.5186	4.2401	49.933	1.73e-05	0.000749407
GIMAP2	-0.548865	5.84835	49.8999	1.74e-05	0.000749407
EDRF1	0.657015	6.6531	49.8294	1.75e-05	0.000749407
KLHL25	1.87677	4.76868	49.8409	1.75e-05	0.000749407
NTN1	2.13127	3.3947	59.3109	1.76e-05	0.000750811
RASSF5	0.60519	6.42747	49.7009	1.77e-05	0.000751012
ENSG00000273118	-0.696314	6.79401	49.726	1.77e-05	0.000751012
NXN	0.948622	5.6101	49.5659	1.8e-05	0.000758173
CYTH3	1.5874	6.04101	49.4781	1.81e-05	0.000759567
NXF1	0.847328	5.87374	49.4771	1.81e-05	0.000759567
IL6ST	0.577005	6.55023	49.2834	1.85e-05	0.000769882
ZNF248	-0.563733	6.07893	49.2667	1.85e-05	0.000769882
TRIM62	1.38895	4.73088	49.0544	1.89e-05	0.00077804
NEIL3	-0.600226	5.84916	49.0859	1.88e-05	0.00077804
GIMAP7	-0.480295	6.77404	49.0749	1.88e-05	0.00077804
EAF1	0.964682	5.78108	48.6414	1.96e-05	0.000798368
AFF4	0.535196	7.48491	48.619	1.97e-05	0.000798368
NR4A3	2.991	4.82516	48.6337	1.96e-05	0.000798368
LINC01089	-1.05894	4.0355	51.0386	1.96e-05	0.000798368
IL4I1	1.27773	5.07333	48.6951	1.95e-05	0.000798368
ERO1B	1.02815	5.96484	48.471	1.99e-05	0.000804743
FMNL3	1.02607	5.93508	48.483	1.99e-05	0.000804743
MTF1	0.896888	5.88334	48.3731	2.01e-05	0.000804762
KCTD1	-0.743418	5.41699	48.4034	2.01e-05	0.000804762
GNA15	0.738046	6.46914	48.4277	2e-05	0.000804762
WEE1	0.661657	6.00144	48.2998	2.03e-05	0.000807924
HERC2P3	-0.564473	5.78764	48.2682	2.03e-05	0.000807924
ENSG00000222017	-0.529642	6.31246	47.894	2.11e-05	0.000832722
C14orf39	-0.911717	4.25255	63.7847	2.11e-05	0.000832722
IGSF9B	1.28688	4.28087	48.3954	2.13e-05	0.000837706
PPP1R2	0.63683	7.23127	47.4721	2.2e-05	0.000862543
LGMN	0.551333	8.22179	47.3786	2.22e-05	0.000867854
ENSG00000242540	-1.6896	2.43781	47.2045	2.26e-05	0.000880196
PLEKHF2	0.996724	6.05291	46.9503	2.32e-05	0.000899891
GATA2	2.57373	3.08461	63.1941	2.33e-05	0.000902164
FOSB	2.55029	3.93051	46.709	2.37e-05	0.00091617
DAPK1	0.825121	7.3118	46.5525	2.41e-05	0.000924474
LILRB4	0.583448	7.10771	46.5281	2.41e-05	0.000924474
OSM	3.57604	4.67096	46.5821	2.4e-05	0.000924474
KYNU	1.51543	8.05227	46.4114	2.44e-05	0.00092975
USP12	0.686547	6.93611	46.4402	2.44e-05	0.00092975
H2AC14	-0.968526	4.07132	46.3469	2.46e-05	0.000933004
ATP1A1	0.560992	7.02312	46.3057	2.47e-05	0.000933668
RAB21	0.553055	6.5709	46.2807	2.48e-05	0.000933668
SPATA2L	1.26479	4.55816	46.2236	2.49e-05	0.000936276
RAG2	-1.75823	2.49255	45.9798	2.55e-05	0.000956747
RND3	2.00111	3.62639	45.9191	2.57e-05	0.000959805
MMP25-AS1	-0.841882	4.49361	54.8093	2.59e-05	0.000961834
C17orf67	0.834777	5.6463	45.8405	2.59e-05	0.000961834
DOT1L	0.862462	5.72573	45.8024	2.6e-05	0.000962745
ARL5B	0.847244	5.82772	45.5592	2.66e-05	0.000983955
CHML	0.793252	5.87158	45.4428	2.69e-05	0.000992815
GRAP2	-0.553713	6.04532	45.2265	2.75e-05	0.00101208
GP6-AS1	1.0162	4.98642	45.1129	2.79e-05	0.00102099
SLC25A33	0.602866	6.39973	44.9222	2.84e-05	0.00103051
AGO4	-0.481808	6.38529	44.9114	2.85e-05	0.00103051
RHOH	-0.43239	6.75111	44.9175	2.84e-05	0.00103051
ARL4D	1.5944	5.09907	44.934	2.84e-05	0.00103051
PHLDA1	2.37539	5.73786	44.8712	2.86e-05	0.00103185
RAB2B	0.743331	5.59916	44.6953	2.91e-05	0.00104779
RHEBL1	1.1223	4.56519	53.6782	2.94e-05	0.00105751
ENSG00000227400	-0.530986	5.95389	44.5058	2.97e-05	0.00106255
ENSG00000267787	-0.597161	5.64241	44.1966	3.06e-05	0.00109421
STX5	0.595292	6.22169	44.0719	3.1e-05	0.00110546
ACOX1	0.586921	6.29019	44.0241	3.12e-05	0.00110557
ZNF337-AS1	-0.871563	4.46288	46.5834	3.12e-05	0.00110557
CLSTN3	1.44195	5.35486	43.9026	3.16e-05	0.00111588
TXNIP	-0.706146	7.75051	43.8622	3.17e-05	0.00111753
CFD	0.583011	8.10922	43.8355	3.18e-05	0.00111758
RIPK2-DT	0.90071	5.26874	43.7901	3.2e-05	0.00111983
SQSTM1	0.470099	8.42557	43.7202	3.22e-05	0.00112261
JPX	-0.464472	6.82961	43.7145	3.22e-05	0.00112261
ATP6V1C1	0.495106	7.08844	43.6585	3.24e-05	0.00112434
CH25H	2.14621	3.08873	57.6085	3.25e-05	0.00112434
ENSG00000236656	-1.11779	4.44114	43.5497	3.28e-05	0.00112993
MAP3K9	1.2183	4.83421	43.5577	3.28e-05	0.00112993
LITAF	0.449852	8.22523	43.4984	3.3e-05	0.00113301
SNTG2-AS1	-1.45403	2.91883	43.4656	3.31e-05	0.00113389
CCRL2	1.08179	5.97479	43.2272	3.39e-05	0.00115979
SERPINF1	0.970422	6.53078	43.1344	3.43e-05	0.00116816
RNF103	1.13829	5.15949	42.9267	3.5e-05	0.00119112
SAT1	0.369964	8.93649	42.8259	3.54e-05	0.00120083
FFAR2	3.56265	2.84278	42.775	3.56e-05	0.00120419
NT5DC3	1.56167	4.35097	42.7282	3.58e-05	0.00120704
ORAI2	-0.56514	6.28475	42.5567	3.65e-05	0.00122623
CTNNAL1	0.570195	6.3886	42.4905	3.67e-05	0.00123175
CLK1	0.98234	6.46453	42.3747	3.72e-05	0.00124395
MIR3142HG	2.72762	5.87352	42.3351	3.73e-05	0.00124602
ARG2	1.00475	4.93811	42.2599	3.76e-05	0.0012529
NFKBIE	2.08187	6.02391	41.9539	3.89e-05	0.00129182
ABTB2	1.58644	5.41113	41.8477	3.94e-05	0.00130346
ARHGEF10L	1.33811	5.77373	41.6516	4.02e-05	0.00132139
IRF1	0.493533	7.93656	41.6959	4e-05	0.00132139
GIMAP1	-0.688667	5.76603	41.6751	4.01e-05	0.00132139
CSRNP1	1.84485	4.59071	41.5147	4.08e-05	0.00133108
PTGER4	0.9291	7.0562	41.515	4.08e-05	0.00133108
ATP2B1	0.977925	7.63897	41.5599	4.06e-05	0.00133108
RILPL2	0.529238	7.27745	41.4677	4.1e-05	0.00133455
PTGER2	1.76778	3.91856	41.3044	4.18e-05	0.00135527
TANK	0.746881	7.92144	41.1656	4.24e-05	0.0013727
CTH	1.68799	3.77943	44.166	4.4e-05	0.00142134
GFPT2	3.41993	2.66535	40.7889	4.42e-05	0.00142403
WHRN	1.74279	4.20037	40.6634	4.49e-05	0.00144044
SPATA7	-0.697137	5.0605	40.6188	4.51e-05	0.001444
SDS	1.04512	6.60008	40.5627	4.54e-05	0.00144944
MAFA	3.19118	3.65108	40.4955	4.57e-05	0.00145673
TSC22D2	0.73861	6.59318	40.4719	4.58e-05	0.00145694
ST3GAL1	0.795632	7.23739	40.3791	4.63e-05	0.00146852
ARL4A	0.867219	6.03802	40.2731	4.69e-05	0.00148242
FPR3	0.468764	7.32612	40.2442	4.7e-05	0.00148355
HLA-DQA1	0.77428	7.66534	40.0479	4.81e-05	0.00150928
ATP2B1-AS1	1.27877	5.21771	40.0576	4.8e-05	0.00150928
CDKN1A	0.970786	5.8116	39.8202	4.93e-05	0.00154489
BTG3	0.638106	6.71339	39.6804	5.01e-05	0.00156281
YPEL1	-0.668746	5.60342	39.6755	5.01e-05	0.00156281
ENSG00000251194	2.46478	2.78211	39.6517	5.03e-05	0.00156324
TSC22D1	0.782171	7.1037	39.6138	5.05e-05	0.00156617
MAFF	2.30763	6.4289	39.4725	5.13e-05	0.00158776
TAGAP	1.09905	5.64557	39.4041	5.17e-05	0.00159249
PIK3AP1	0.874711	7.29765	39.4228	5.16e-05	0.00159249
P2RX4	0.549916	7.22834	39.3337	5.21e-05	0.00160152
DGKD	0.63905	6.4322	39.2485	5.26e-05	0.00160225
PRANCR	-0.964157	4.83957	39.2253	5.28e-05	0.00160225
LINC01550	-0.801209	4.6891	39.2615	5.26e-05	0.00160225
SPESP1	-1.3566	3.045	42.5411	5.27e-05	0.00160225
ENSG00000290183	-1.42915	2.78405	49.8239	5.24e-05	0.00160225
H2BC15	-1.15498	3.61699	41.9532	5.32e-05	0.00161048
PID1	1.09164	6.94506	39.1256	5.34e-05	0.00161304
CHUK	0.683409	6.21579	39.0745	5.37e-05	0.00161518
ZFP90	-0.666679	5.20833	49.4547	5.38e-05	0.00161518
ENSG00000273748	-0.774028	4.89123	39.0678	5.38e-05	0.00161518
ENOSF1	-0.441462	7.33032	38.8252	5.53e-05	0.00165426
H2AC20	-0.487039	6.38048	38.717	5.6e-05	0.00167122
CARF	-0.819068	4.66173	38.6405	5.65e-05	0.00168218
ATP2A3	-0.44757	6.78666	38.5637	5.7e-05	0.00169333
HSPA4L	1.57951	5.69336	38.2632	5.9e-05	0.00174685
LINC01678	0.662918	5.92438	42.1816	5.91e-05	0.00174685
PIGZ	-0.922837	4.26013	38.2312	5.92e-05	0.00174814
TP53BP1	0.527263	6.63221	38.1832	5.96e-05	0.00175396
NFIL3	0.969366	5.47711	38.0262	6.07e-05	0.0017784
UGCG	0.628514	6.8982	38.0335	6.06e-05	0.0017784
GATD1-DT	-0.889312	4.32954	37.879	6.17e-05	0.00180536
MELTF-AS1	-1.5726	2.65557	37.7682	6.26e-05	0.00182497
ENSG00000285744	4.02673	3.19519	37.6304	6.36e-05	0.00184658
ZHX2	0.752078	6.12763	37.6459	6.35e-05	0.00184658
SH3GL1	0.5976	6.0367	37.5741	6.4e-05	0.00185474
PLAUR	0.970566	7.99093	37.5387	6.43e-05	0.00185832
LINC02100	-0.897494	4.24774	56.565	6.52e-05	0.00187923
ENTPD1-AS1	-0.651694	5.39361	37.3994	6.54e-05	0.00188087
HIP1	1.02201	6.91622	37.1344	6.75e-05	0.00193706
PLA2G7	0.472671	8.06217	37.0838	6.79e-05	0.00194449
INTS6L	0.722868	5.61959	37.0554	6.81e-05	0.00194674
VEGFA	1.50761	5.55066	37.0245	6.84e-05	0.00194962
G0S2	2.69208	5.19422	36.8931	6.95e-05	0.00197627
SLC45A4	0.774982	5.7846	36.7815	7.04e-05	0.0019986
MAP3K21	0.981963	5.23897	36.7055	7.1e-05	0.00200811
ASMTL	0.815981	5.86133	36.7215	7.09e-05	0.00200811
PARD6B	0.885401	5.08088	42.1898	7.36e-05	0.00207528
INTS6	1.00369	7.20076	36.395	7.38e-05	0.00207607
IL18BP	0.802582	5.79385	36.3176	7.45e-05	0.00209113
MND1	-0.566248	6.268	36.1901	7.56e-05	0.00211928
LGALS3	0.35451	9.50206	36.1259	7.62e-05	0.00213132
DNTT	-0.625126	5.43659	36.0879	7.66e-05	0.00213659
S100PBP	-0.505229	5.96543	36.0383	7.71e-05	0.00214493
RNF170	-0.670271	5.1001	43.2832	7.81e-05	0.00216997
SGTB	0.546703	6.32425	35.8903	7.85e-05	0.00217483
KHDRBS3	0.915695	5.4214	35.8491	7.89e-05	0.00217624
ZNF766	-0.647908	5.50345	35.8323	7.9e-05	0.00217624
NKRF	1.12915	5.16285	35.8549	7.88e-05	0.00217624
BCHE	-0.815284	4.52942	39.1506	7.98e-05	0.00218382
DDX21	0.405768	7.54505	35.7768	7.96e-05	0.00218382
NECTIN2	0.737761	5.60867	35.766	7.97e-05	0.00218382
RHOB	1.14138	5.07957	35.6653	8.07e-05	0.00220259
DENND4A	1.08329	7.11295	35.5807	8.15e-05	0.00221919
YES1	0.750931	6.09939	35.5701	8.16e-05	0.00221919
LETMD1	-0.606637	5.55624	35.52	8.22e-05	0.0022283
CCNL1	0.517353	7.34337	35.4971	8.24e-05	0.0022299
BEND4	0.97721	4.80569	35.3907	8.35e-05	0.00224131
RAPGEF2	0.929713	7.11331	35.388	8.35e-05	0.00224131
RBL2	-0.476227	6.24191	35.4378	8.3e-05	0.00224131
CPD	0.714535	6.39929	35.4032	8.34e-05	0.00224131
TENT5A	-0.608606	5.67376	35.3414	8.4e-05	0.00224964
ZHX3	-0.586048	5.94273	35.2873	8.46e-05	0.00226012
RFX3-DT	-0.604666	5.36895	40.302	8.63e-05	0.00229719
OLR1	2.06414	3.94243	35.1331	8.62e-05	0.00229719
ARL17B	-0.508391	5.83338	35.0879	8.67e-05	0.00230272
ARMC2	-0.746511	4.73738	56.0193	8.86e-05	0.00234895
JMJD6	0.695937	5.63517	34.8823	8.9e-05	0.00235316
ZC3H12C	1.85746	7.14126	34.857	8.93e-05	0.00235578
COPB2-DT	-0.773458	4.58161	39.6104	8.95e-05	0.00235629
LINC01355	-1.89065	2.21974	34.6052	9.21e-05	0.0024031
FCGR3A	-0.961161	3.92467	34.5697	9.26e-05	0.0024031
NEMP2-DT	-1.12987	3.4425	61.7803	9.23e-05	0.0024031
CASP8	-0.386247	6.93516	34.6019	9.22e-05	0.0024031
SNX25	0.946336	5.54885	34.6294	9.19e-05	0.0024031
ACSL5	1.64974	4.995	34.5855	9.24e-05	0.0024031
LUNAR1	-1.1083	3.39082	56.7182	9.18e-05	0.0024031
ENSG00000289860	-1.39137	2.91281	34.4573	9.39e-05	0.00243268
SLC12A2-DT	-0.566811	5.62445	41.3008	9.46e-05	0.00244528
HSPE1	0.366839	8.43496	34.3557	9.51e-05	0.00245438
CCNYL1	0.729151	5.90406	34.1803	9.73e-05	0.00250487
DPH6-DT	-1.46655	2.63063	36.7106	9.75e-05	0.00250617
H2AC11	-0.921921	4.67128	34.0783	9.85e-05	0.0025225
CDK6-AS1	-0.526776	6.47625	34.0933	9.84e-05	0.0025225
C1orf52	0.548653	6.5752	33.8185	0.000101889	0.00259259
ITK	-0.714769	5.22847	33.8345	0.000101679	0.00259259
KCNQ1OT1	1.20424	6.03523	33.832	0.000101713	0.00259259
BMP8A	2.73822	3.31678	33.7158	0.00010325	0.00262196
SERTAD3	0.747172	5.45655	33.5799	0.000105083	0.0026632
RAB30-DT	-0.64304	5.14745	44.1495	0.000105339	0.0026644
UBASH3A	-0.764138	4.5785	54.8719	0.000106484	0.00268805
NFKBIB	0.666718	6.07557	33.4437	0.000106958	0.00269467
ENSG00000229418	-1.42572	2.80759	33.426	0.000107205	0.00269556
KIF15	-0.445346	6.59013	33.2021	0.000110383	0.00275375
TIPARP	1.22334	5.56657	33.2456	0.000109757	0.00275375
SLC1A3	0.689017	7.16931	33.212	0.00011024	0.00275375
CHRNA7	1.21508	4.29996	33.2273	0.00011002	0.00275375
ZKSCAN1	-0.471811	6.91746	33.1743	0.000110785	0.00275836
ENSG00000291283	-0.714482	4.68159	35.0324	0.000111977	0.00278262
B3GNT5	1.30257	5.04772	32.8797	0.000115155	0.00285603
H3-3A-DT	-1.79201	1.99445	40.214	0.000115887	0.00286308
MB21D2	2.01181	5.46373	32.8316	0.000115889	0.00286308
AP1S3	1.24493	4.75951	32.7874	0.000116566	0.00287424
HDX	1.21579	4.68486	32.7272	0.000117497	0.00289161
ENSG00000227885	-1.09765	3.54445	32.6679	0.000118423	0.00290878
PELI1	0.678351	6.3985	32.6084	0.00011936	0.00292617
CD274	1.48647	3.90138	47.8583	0.000119655	0.00292776
GFPT1	0.46457	6.84987	32.5381	0.000120481	0.00293669
ZC4H2	-0.525029	6.13028	32.5391	0.000120465	0.00293669
LONRF1	0.907486	5.24242	32.4218	0.000122358	0.00297559
PARVB	0.709939	5.86158	32.4105	0.000122543	0.00297559
TANK-AS1	2.04306	3.11714	42.815	0.000122903	0.00297865
MAPKAPK2	0.516369	6.24282	35.4782	0.000123763	0.00298249
ENSG00000247121	-1.05956	3.63265	39.5684	0.000123519	0.00298249
TRIM26	0.594196	6.25172	32.3375	0.000123742	0.00298249
MIR181A2HG	-1.1088	3.89047	32.2931	0.000124478	0.00299404
ENSG00000287784	-0.492148	6.31084	32.2602	0.000125026	0.00299754
NUP50-DT	-0.624197	5.2827	36.438	0.000125094	0.00299754
ENSG00000289512	-1.10032	3.44382	43.0678	0.000126615	0.0030283
STK40	0.558412	6.53394	32.1236	0.000127335	0.00303982
ADGRE2	0.560597	6.67544	32.0825	0.000128038	0.00305091
CACYBP	0.403239	8.20619	32.0416	0.000128745	0.00306202
ENTPD7	1.0899	4.44155	48.2954	0.000129093	0.00306457
SRC	0.933243	4.95008	32.0066	0.000129353	0.00306503
RGL1	0.790975	7.44517	31.9705	0.000129982	0.00307422
SLC19A2	1.0188	5.0634	31.8781	0.000131612	0.00310701
ETS2	0.626779	6.90134	31.852	0.000132075	0.00311218
NIBAN1	0.650774	7.03499	31.6347	0.000136018	0.00319919
CCR5	1.25946	4.66336	31.427	0.000139918	0.00328484
CABCOCO1	-1.19335	3.5481	31.4127	0.00014019	0.00328519
UGDH	0.840254	5.10513	36.0015	0.000141021	0.0032986
INTS12	0.634247	5.99728	31.3482	0.000141432	0.00330215
ENSG00000290931	-0.721894	4.91356	31.3128	0.000142118	0.0033121
ST7L	-0.603466	5.26114	31.8961	0.00014254	0.00331588
SLC20A1	0.635622	6.9118	31.1039	0.000146247	0.00339592
ZNF169	-0.827541	4.32956	48.3975	0.000147248	0.0034098
SLC38A2	0.389116	7.65457	31.0478	0.00014738	0.0034098
ABL2	0.78494	6.9402	31.0231	0.000147883	0.00341524
PDE4DIP	1.00018	6.82898	30.9532	0.000149315	0.00344207
ITGA5	0.79806	5.88124	30.9322	0.000149749	0.00344586
IER5L	0.596716	6.65764	30.8914	0.000150595	0.00345907
ARSG	-0.712337	4.76175	33.2214	0.000151193	0.00346656
KLHL15	1.12062	4.92051	30.8386	0.000151699	0.00347192
ANKRD17-DT	-1.08344	3.66436	46.9394	0.000154249	0.00351766
ARHGEF7	0.489307	6.7314	30.7305	0.000153989	0.00351766
PTPRJ	0.94402	7.12865	30.6944	0.000154761	0.00352302
CRISPLD2	3.64229	2.62356	54.5146	0.00015757	0.00358057
MRPL18	0.410683	7.12414	30.5078	0.000158833	0.00360286
SEMA4A	1.16367	4.61922	30.4922	0.000159179	0.00360429
RBL1	-0.4962	6.16024	30.4574	0.000159955	0.00361543
ARL8B	0.386995	7.40635	30.4047	0.000161138	0.00363107
LSS	0.777185	5.83349	30.4012	0.000161216	0.00363107
COQ10B	0.53688	6.12215	35.4342	0.000162344	0.00365001
LINC00511	1.52224	4.37621	30.3212	0.000163032	0.00365904
TCAIM	-0.51663	5.99569	30.2701	0.000164205	0.00367887
MFSD2A	0.955574	6.04422	30.257	0.000164507	0.00367919
ZNF512B	-0.69298	4.86067	43.694	0.000165319	0.00369086
DPH5-DT	-0.726409	4.68092	30.0447	0.000169497	0.00374353
GMDS-DT	-0.420458	7.03462	30.092	0.000168371	0.00374353
DOCK4	0.803792	7.79383	30.0384	0.000169647	0.00374353
EHD1	0.761902	5.49003	30.0814	0.000168622	0.00374353
TMEM135	0.588698	6.54504	30.0762	0.000168745	0.00374353
ING1	0.680937	5.51774	32.3586	0.000169733	0.00374353
MYH9-DT	2.33462	2.97722	41.3358	0.000169142	0.00374353
TRIM36	1.59703	4.30133	30.0086	0.000170364	0.00375095
NRP2	0.533133	7.23115	29.9728	0.000171228	0.00375699
FBXL14	0.781482	5.19768	29.9847	0.00017094	0.00375699
ADAM17	0.685662	7.00052	29.9292	0.000172287	0.00377373
LMNB1-DT	-1.48439	2.63081	29.8509	0.000174207	0.00380272
MAP2K3	0.885003	6.29187	29.8589	0.000174011	0.00380272
RFC3	-0.379289	6.89078	29.834	0.000174626	0.00380535
PTPN1	0.372792	7.40898	29.8168	0.000175052	0.00380813
APTR	0.832235	5.08721	31.5517	0.000177083	0.00384575
TRA2A	0.423287	7.25944	29.647	0.000179333	0.00387849
LRIG3	1.39564	3.79215	43.6212	0.000179279	0.00387849
C21orf58	-0.563189	6.55587	29.6403	0.000179503	0.00387849
TFEB	0.592791	6.07828	29.5194	0.00018263	0.00393937
DNAJB4	1.88251	5.04301	29.4784	0.000183702	0.00395403
AHR	0.757393	6.19637	29.4698	0.00018393	0.00395403
ATP2C1	0.747077	6.97781	29.4316	0.000184939	0.00396237
CDKN1C	0.848823	5.22012	32.3903	0.000184872	0.00396237
LEF1	-0.327667	8.01871	29.4152	0.000185373	0.00396499
ENSG00000291006	0.919111	4.90413	34.868	0.000185889	0.00396938
ZNF267	0.898551	6.74468	29.3774	0.000186381	0.00397321
OAT	0.674241	5.99126	29.3583	0.000186892	0.00397747
DENND5A	0.541768	6.85102	29.1636	0.000192204	0.0040837
MAGI3	1.04394	5.81034	29.1115	0.000193657	0.00408899
IKZF2	-0.338522	7.47837	29.1287	0.000193175	0.00408899
NT5DC2	-0.605537	5.37372	29.1087	0.000193736	0.00408899
H4C3	-0.428872	8.01398	29.141	0.000192833	0.00408899
BRD3	-0.420604	6.33909	31.5257	0.000194603	0.0040955
TOB1	0.64927	5.88526	29.7988	0.000194687	0.0040955
LRRC63	-0.883243	3.98574	32.3631	0.000197158	0.00414064
PXYLP1	-0.514613	5.65815	35.5132	0.000197764	0.00414653
GNG7	0.727535	5.40885	33.1516	0.00020308	0.004251
ZNF697	1.50584	4.21499	28.7063	0.000205396	0.00428542
SIK1	1.78143	3.41387	41.5142	0.000205344	0.00428542
LHFPL2	0.813199	6.49108	28.6473	0.000207174	0.004311
ATF7IP2	0.453367	6.89343	28.6432	0.000207299	0.004311
PSEN1	0.654206	6.97114	28.5878	0.000208986	0.00433901
EFCAB14	0.390185	7.1153	28.4709	0.000212601	0.00440689
MAP1LC3B	0.365105	7.69747	28.4469	0.000213351	0.00441525
BCL2A1	0.881033	7.56679	28.4232	0.000214095	0.00441983
TOM1	0.491918	6.51324	28.4178	0.000214266	0.00441983
WAKMAR2	-0.750372	5.42791	28.3134	0.000217587	0.0044811
FBXO33	0.508131	6.27018	28.1486	0.000222953	0.00458419
LINC01504	-0.759845	4.54862	33.3906	0.00022544	0.00462787
LINC02245	-0.526723	5.6713	36.5472	0.000227068	0.0046538
EML4	0.836061	6.93203	28.0033	0.000227813	0.00466156
SRGN	0.46889	7.89417	27.9133	0.000230885	0.00471687
SCYL2	0.701901	6.73789	27.8718	0.000232319	0.00473857
CA8	0.898557	5.15489	27.7936	0.000235049	0.00478659
ATP13A3	0.734591	7.45311	27.7743	0.000235731	0.00479282
ING2-DT	-1.14475	3.71099	27.7068	0.000238126	0.00482326
SGK1	0.834706	8.34183	27.7001	0.000238363	0.00482326
YTHDF3	0.449339	6.75692	27.7139	0.00023787	0.00482326
CDC7	-0.5573	5.59608	27.6405	0.000240505	0.0048512
MSX1	1.17555	4.28358	31.3145	0.000240356	0.0048512
SAMSN1	0.387706	6.88511	27.6043	0.000241814	0.00486991
HLA-DRA	0.377969	8.93779	27.5682	0.000243134	0.00488092
PTK7	0.773245	5.82751	27.5615	0.000243376	0.00488092
MIR222HG	1.54838	4.41784	27.5579	0.00024351	0.00488092
HLA-DQB1	0.466738	7.75862	27.4481	0.00024757	0.00495451
UBE2E1	0.493073	7.5314	27.3986	0.000249427	0.00498385
EPSTI1	0.585651	6.98058	27.3847	0.000249955	0.00498658
WIPF1	-0.331374	7.33913	27.3039	0.000253029	0.00503868
SPAG9	0.525133	7.80808	27.2953	0.000253357	0.00503868
CCL22	1.91254	3.89242	27.246	0.00025526	0.00506861
OXLD1	-0.540516	5.52744	31.404	0.000256284	0.00508104
HYPK	2.19338	3.91554	27.1107	0.000260565	0.00515788
ATP6V1B2	0.373977	7.32308	27.0251	0.000263986	0.00521752
GBP1	0.482199	6.27747	26.9118	0.000268598	0.00528631
TYW1B	0.805339	6.23986	26.9146	0.000268485	0.00528631
JUND	0.479422	7.72127	26.9091	0.000268711	0.00528631
SNIP1	0.613109	5.80552	26.8616	0.000270675	0.00531674
DNAH14	-0.390209	6.50335	26.8121	0.000272738	0.00531843
PIGX	-0.390761	6.63742	26.8331	0.00027186	0.00531843
HPSE	0.910627	4.84994	26.8364	0.000271721	0.00531843
MXD3	-0.762993	4.8008	26.8084	0.000272892	0.00531843
PSD3	1.15862	6.30431	26.7995	0.000273264	0.00531843
ZNF44	0.582246	5.80109	28.4201	0.00027229	0.00531843
MAP7D3	-0.695218	4.85384	32.5117	0.000273865	0.00532199
NFATC1	0.622671	5.75512	26.7439	0.00027561	0.00534776
PRXL2C	0.584243	5.90716	26.6162	0.000281087	0.00544574
RIPOR2	-0.368643	6.70526	26.4895	0.00028665	0.00554509
ENSG00000289439	-1.5973	2.24978	43.1812	0.000287103	0.00554544
MIR3945HG	1.84104	3.27389	31.2377	0.000289468	0.00558266
PPP1R18	0.385349	7.31686	26.3953	0.000290865	0.00560114
EGR3	3.71384	3.14961	26.3675	0.000292126	0.00560847
SCML1	0.71429	5.37617	29.1302	0.000291729	0.00560847
MRTFA	0.507803	7.03624	26.3368	0.000293524	0.00562684
TARS3	0.622363	6.10794	26.3261	0.000294013	0.00562774
LCP2	0.611233	7.69737	26.2689	0.000296645	0.00566962
PEAK1	0.620011	7.66577	26.2369	0.000298127	0.00568941
FAM91A1	0.544818	6.43373	26.2042	0.000299653	0.00570998
ENSG00000232611	-0.71185	4.64306	43.05	0.000305386	0.00581054
CCDC26	-0.339506	7.96506	26.0645	0.000306272	0.00581872
CBR4	-0.408553	6.34241	32.289	0.000307431	0.00583204
H3C4	-0.573602	5.74474	26.0102	0.000308893	0.0058457
HIF1A	0.463276	7.99143	25.9971	0.000309527	0.0058457
LINC00278	-0.403936	6.73605	26.004	0.000309191	0.0058457
TRIB1	1.22226	4.24586	25.9762	0.000310546	0.00585628
PRKCG	2.21163	3.12317	28.5778	0.000312707	0.00588832
TCF7L2	0.51299	6.84086	25.8842	0.000315072	0.00592409
PPP1R3E	-0.84128	4.23544	33.1012	0.000319562	0.00599967
ENSG00000290833	-0.473981	6.05025	25.7535	0.000321639	0.00602979
PHGDH	-0.387686	6.6067	25.7235	0.000323165	0.00604949
ENSG00000291143	-0.490107	5.74674	33.1054	0.000328519	0.0061407
PCMTD1-DT	-1.01511	3.64101	42.6612	0.000331117	0.0061802
ENSG00000289405	0.970334	4.89102	25.4738	0.000336237	0.0062666
ENSG00000289985	1.59224	3.69834	27.2405	0.000337421	0.00627948
HIVEP2	0.599624	6.17443	25.3985	0.0003403	0.00632383
KLF4	1.26286	4.43268	25.3592	0.000342444	0.0063544
GNA13	0.507192	6.81838	25.2628	0.000347768	0.00644382
RAB30	1.15885	4.08308	25.2526	0.000348341	0.00644506
H1-3	-0.323185	7.87279	25.1819	0.000352316	0.00649035
NDUFV2-AS1	1.20047	4.08837	30.1878	0.00035228	0.00649035
LILRA2	0.603165	5.75629	37.0108	0.000352271	0.00649035
SPN	-0.402275	7.19636	25.1581	0.000353662	0.00650576
CYB561A3	0.45119	7.15454	25.1285	0.000355349	0.00652736
TSEN2	-0.629672	4.96373	42.4617	0.00035981	0.0065998
LDAH	-0.443799	6.08997	24.9845	0.000363698	0.00662038
PLSCR1	0.44618	6.85646	25.0032	0.000362603	0.00662038
H4C5	-0.7302	4.45235	35.639	0.000364048	0.00662038
HECA	0.63077	5.93937	24.9814	0.000363881	0.00662038
TVP23C	0.655409	5.96351	25.0122	0.000362073	0.00662038
SLC14A1	-1.17219	3.00293	42.0359	0.000363418	0.00662038
PRR11	-0.631316	5.96031	24.9496	0.000365759	0.00664202
FNDC3B	0.611383	7.78686	24.9225	0.000367366	0.00666171
AGAP3	0.502756	6.42218	24.9076	0.000368249	0.00666824
AK9	-0.571369	5.25249	34.0532	0.000369624	0.00667801
ELL	0.921238	5.88641	24.8811	0.000369837	0.00667801
GOT1	0.618197	5.65524	35.0024	0.000370415	0.00667899
ENSG00000255367	1.12821	4.381	24.8604	0.000371081	0.00668155
RSL1D1-DT	0.723506	5.26022	24.8047	0.00037445	0.0067327
IQSEC2	-0.993831	3.60106	28.2814	0.000375332	0.00673907
CD74	0.31335	9.27379	24.7639	0.000376938	0.00675838
ENSG00000255240	-1.32725	2.67624	37.2251	0.000379082	0.00678728
AMD1	0.438039	6.95244	24.6718	0.000382632	0.00684123
POU3F1	2.14439	3.63743	24.6557	0.000383638	0.00684604
CNNM2	0.919523	6.1672	24.6503	0.000383975	0.00684604
ATP1B1	0.422603	7.30109	24.5529	0.000390134	0.00694613
HCG17	-0.543318	6.03354	24.5273	0.000391772	0.00695111
PTPN12	0.737352	7.31223	24.5172	0.000392425	0.00695111
CDT1	-0.420743	6.10661	25.2326	0.000391364	0.00695111
SYNJ1	0.641338	6.12062	24.5145	0.000392595	0.00695111
ARHGAP25	-0.432738	6.71522	24.3926	0.000400526	0.0070817
SLC49A4	-0.496264	6.18304	24.3531	0.000403137	0.00711799
RASL11A	1.54293	3.82831	24.3383	0.000404123	0.00712553
CD22	0.651184	5.62248	25.9361	0.000408007	0.00718409
PRKAR2B-AS1	2.26485	2.848	24.1777	0.000414974	0.00729667
SMAD3	0.872532	5.59982	24.1187	0.000419047	0.00735814
ACBD3	0.363729	7.31075	24.0988	0.000420432	0.00737231
MBOAT2	0.843049	6.08686	24.0785	0.000421848	0.00737684
ENSG00000249988	-0.852928	4.18336	24.0833	0.000421517	0.00737684
MTMR14	0.522979	6.33154	24.0505	0.000423816	0.00740111
NPTN	0.404015	7.07226	23.9916	0.000427987	0.00746372
GRAMD1A	0.434708	6.48604	23.9616	0.000430128	0.00749081
RCSD1	-0.34902	6.97906	23.8466	0.000438456	0.00759216
ARHGAP31	1.19859	6.95116	23.8523	0.000438039	0.00759216
MYLIP	0.915895	5.07216	23.8603	0.000437449	0.00759216
ENSG00000226824	-0.373842	6.76484	23.8402	0.000438926	0.00759216
TMEM138	0.591224	6.65843	23.8402	0.000438924	0.00759216
ZNF580	-0.489432	6.10548	23.7903	0.000442599	0.00764532
SYDE2	0.900708	4.66641	23.7617	0.000444723	0.00766125
SIRT5	-0.851342	4.04392	35.0309	0.000444208	0.00766125
TXNRD3	-0.578706	5.22867	38.243	0.000447568	0.00769667
ZNF709	0.719672	5.20433	26.0415	0.000447986	0.00769667
TRAF3	0.70615	7.63954	23.6124	0.000456009	0.00782396
KCNE3	-0.763864	4.714	23.5748	0.000458904	0.00786304
PSME4	0.74712	6.98714	23.5438	0.000461307	0.00789361
ABCC4	0.677697	5.22175	24.5321	0.00046509	0.00794767
TRIM56	-0.379156	6.70533	23.4626	0.000467666	0.00798099
HTRA1	-0.676202	4.64821	27.5821	0.000475027	0.00809578
LNCAROD	-0.861039	3.78322	30.3453	0.000477094	0.00812015
EEIG1	0.780683	4.94879	25.4722	0.000481656	0.00818686
HS3ST2	0.801837	7.53257	23.2601	0.000484001	0.00821578
LUZP1	0.523946	6.77501	23.2426	0.000485437	0.00822595
NDRG1	1.01917	4.46414	31.8612	0.000485891	0.00822595
COG3	0.612038	5.62448	23.222	0.000487146	0.00823626
UBAP1	0.576067	6.69813	23.1972	0.000489208	0.00826016
PTPRO	-0.786709	4.28576	26.6202	0.000490943	0.00827849
FLT1	0.836291	6.49989	23.1463	0.000493467	0.00831006
ZNF767P	-0.538338	6.08698	23.1295	0.000494884	0.00831196
LPCAT3	0.631603	5.8307	23.1308	0.000494777	0.00831196
KRCC1	-0.472456	6.0215	23.1136	0.000496226	0.00832354
MTCH1	0.339817	7.36632	23.0884	0.000498372	0.0083376
MIR22HG	1.0546	4.54999	23.0945	0.000497855	0.0083376
PLIN2	0.776364	8.40569	23.0705	0.000499902	0.00835223
KCNG3	1.37934	3.79376	36.8573	0.000503796	0.00840628
ME1	-0.461766	6.27683	23.0133	0.000504816	0.00841228
AREL1	0.697867	5.98658	22.9484	0.000510467	0.00849534
DNAI4	-1.3466	2.69358	37.8912	0.000515376	0.00856586
SGPP1	0.658947	6.04121	22.8605	0.000518228	0.00860205
LARP4	0.352531	7.26503	22.8369	0.000520345	0.00862595
LINC00342	-0.302986	7.47624	22.795	0.000524109	0.00867707
SOCS1	1.43651	4.63869	22.749	0.00052829	0.00873493
UPP1	0.687112	5.9679	22.7145	0.000531447	0.00877575
ZEB1-AS1	-1.15056	3.10098	41.1191	0.000533386	0.00879026
PCNX4	-0.378659	7.20384	22.69	0.000533704	0.00879026
SIRPD	-0.796802	4.23521	24.7146	0.000534407	0.00879049
NOP58	0.327668	7.66139	22.6462	0.000537766	0.00883308
HACD2	0.548634	6.01863	22.6396	0.000538383	0.00883308
ENSG00000227627	-1.00409	3.32938	40.2818	0.000539671	0.00884283
FOSL2	0.927487	5.01929	22.5871	0.000543305	0.00889096
MSC	1.75011	3.1049	26.4334	0.000544159	0.00889351
FKBP4	0.410983	6.68392	22.5439	0.000547394	0.00893493
ENSG00000284959	-0.716923	4.51105	32.0895	0.000552126	0.00900064
TRA2B	0.328964	7.53971	22.4627	0.00055518	0.00901716
HLA-DRB1	0.32928	8.95692	22.4719	0.000554289	0.00901716
HHEX	-0.797118	4.29286	22.7086	0.000555261	0.00901716
OTOAP1	0.518751	6.18417	22.4413	0.000557257	0.00903806
WDFY2	0.566687	6.86077	22.3999	0.000561293	0.00909194
CEP68	-0.674685	4.76862	28.9347	0.000568567	0.00919808
MT1G	4.25214	2.58472	22.209	0.000580372	0.00937717
BICDL1	0.797344	5.28033	22.1853	0.000582786	0.00940425
B4GALT5	0.928655	7.18636	22.165	0.000584875	0.00942603
SMAD7	1.8041	3.15802	28.6925	0.000587519	0.00945669
PRAM1	-0.414148	6.45975	22.1223	0.000589282	0.0094731
ITGA4	-0.273261	7.94234	22.1106	0.000590503	0.00948076
SUSD6	0.597245	6.52461	22.0615	0.000595626	0.00955099
ENSG00000226471	-0.670569	4.68321	30.3429	0.000600118	0.00961093
CTSK	0.570193	6.26949	21.9876	0.000603453	0.00965222
MARCO	0.497199	6.6777	21.9132	0.000611453	0.00976601
ABCB9	0.991959	4.41165	21.9072	0.0006121	0.00976601
FAM222A	1.51032	3.60744	27.6483	0.000613663	0.00977873
TLE1	0.790138	4.89798	25.0583	0.000617222	0.00982315
LINC01409	-1.09184	4.76094	21.8419	0.000619242	0.00984302
ABCA1	0.635027	7.11341	21.8147	0.000622238	0.00987833
SNN	0.541981	5.99912	21.8057	0.000623237	0.00988187
ARHGAP19	-0.509037	5.49787	28.7016	0.000624952	0.00989676
KPNA4	0.334245	7.26193	21.7631	0.000627972	0.00991993
ANKRD37	1.06896	4.25809	29.4239	0.000627235	0.00991993
ZNF436	1.54139	3.68726	21.7405	0.000630512	0.00993859
LDLR	1.33333	6.11915	21.7387	0.000630712	0.00993859
ZBTB10	0.666719	5.36714	28.7662	0.000631921	0.00994535
SLC11A2	0.659623	6.54145	21.7159	0.000633282	0.00995448
FAM184A	0.55998	6.07845	21.6897	0.000636242	0.00998869
AHRR	0.632549	5.29156	22.425	0.000637729	0.00999972
RNF145	0.38853	6.83958	21.5583	0.000651376	0.0102012
C16orf87	0.467931	6.47045	21.4799	0.00066061	0.0103331
PLPP3	0.495627	6.92591	21.4209	0.00066765	0.0104192
FBXO16	-0.830507	4.03424	33.9315	0.00066775	0.0104192
POLR2J3	-0.347618	6.83032	21.3905	0.000671321	0.0104493
ABI1	0.387187	7.30859	21.394	0.000670891	0.0104493
GIMAP4	-0.383566	6.6728	21.353	0.000675877	0.0105074
S100Z	-0.71235	4.42068	25.5325	0.000678571	0.0105364
ENSG00000289618	1.14547	4.3045	22.4009	0.000680312	0.0105506
LINC02541	2.388	2.8752	27.4134	0.000681261	0.0105525
FOLR2	0.584303	6.08853	21.2557	0.00068786	0.0106204
TGFB1	0.373593	7.20765	21.2572	0.000687678	0.0106204
SLC35E4	0.943845	4.56218	23.5029	0.000688144	0.0106204
SREBF2-AS1	1.91283	3.26168	27.2204	0.000690851	0.0106493
MARCHF6	0.347243	6.99373	21.2206	0.000692246	0.0106579
SESTD1	0.589547	6.63219	21.1813	0.000697197	0.0106954
CCZ1	0.52617	5.86688	30.5602	0.000695607	0.0106954
CCDC102B	-0.522508	5.38896	28.4365	0.000696819	0.0106954
ENSG00000257342	1.8866	2.95415	32.7046	0.000705132	0.0107683
P2RX7	0.553844	7.30304	21.1174	0.00070533	0.0107683
MMP2	1.21906	3.91848	43.9003	0.000705024	0.0107683
CXADR	0.92257	4.51501	35.8077	0.000705091	0.0107683
TOR3A	0.568425	6.3699	21.0795	0.000710214	0.010817
GALM	-0.545675	5.60625	21.0833	0.000709719	0.010817
MATCAP2	0.910349	4.50922	21.7957	0.000713033	0.010847
TNIK	0.841723	5.87455	21.0388	0.000715499	0.0108715
ENSG00000189229	-0.807853	4.17405	21.0183	0.000718175	0.0108992
ENSG00000288891	-0.467641	5.67704	30.7248	0.000720527	0.0109219
ING4	-0.51006	5.48396	21.4544	0.000723586	0.0109552
TCEANC2	-0.584363	4.96236	23.7261	0.000725512	0.0109713
ENSG00000261474	-0.84246	3.84796	23.2635	0.000745684	0.011263
ENSG00000291233	0.793695	5.04349	20.7941	0.000748263	0.0112886
H3C11	-1.01081	3.23221	33.322	0.000749992	0.0113013
GPR174	-0.408938	6.59639	20.7452	0.00075501	0.0113635
FPGT	-0.690494	4.67944	20.7387	0.000755919	0.0113637
TMEM177	-1.06262	3.45961	28.1996	0.000759517	0.0114044
CD55	0.403888	6.59749	25.3344	0.000764085	0.011446
LRP4	1.70683	3.20634	39.9551	0.000763659	0.011446
NUDT8	-0.570265	6.18914	20.6645	0.000766332	0.0114662
PPIF	0.606505	6.40465	20.6387	0.000769986	0.0115074
MS4A7	0.330598	7.97768	20.5813	0.000778191	0.0116164
RRAS2	0.604436	5.6557	20.5146	0.000787867	0.0117333
KCNN4	0.763015	5.36108	20.517	0.000787524	0.0117333
NDUFAF7	0.706693	5.08826	30.0829	0.000791688	0.0117765
USP6NL	0.453553	6.4246	20.4752	0.000793647	0.0117919
EREG	1.31773	5.1272	20.3588	0.000811016	0.0120219
STXBP1	0.540128	5.78853	21.1641	0.000810527	0.0120219
ANKRD7	-0.845874	3.88038	34.2175	0.000812044	0.0120232
EHD4	0.614058	6.43875	20.3291	0.000815517	0.0120536
TAF4	0.750148	5.24711	20.326	0.00081599	0.0120536
CDC14A	0.793647	6.10496	20.3068	0.00081893	0.012083
LRRC8B	0.623591	5.45601	28.2401	0.000829195	0.0122169
SIK3	0.670799	7.47202	20.2355	0.000829919	0.0122169
LINC01572	-0.353897	6.38504	21.6539	0.000848253	0.0124724
IDI1	0.410311	6.49373	23.8628	0.000872704	0.0128171
INSIG1	0.377175	6.937	19.9195	0.000880746	0.0129203
ENSG00000290796	0.884781	4.59846	19.9125	0.000881913	0.0129226
HYCC1	0.556854	6.38378	19.902	0.000883663	0.0129333
CDK14	0.858349	6.17224	19.8611	0.000890538	0.013019
SYTL1	-0.666092	4.6334	24.0222	0.000895884	0.01308
PAAF1	-0.635364	4.78571	37.4285	0.000896765	0.01308
R3HDM2	-0.280888	7.44157	19.8172	0.000897975	0.0130827
ERRFI1	1.61589	3.41995	40.8136	0.000899911	0.0130862
DIS3L	-0.554272	5.18298	27.2844	0.000900266	0.0130862
ANKMY1	-0.505911	5.35451	22.6162	0.000913251	0.0132464
AHSA1	0.326423	7.29053	19.7278	0.000913364	0.0132464
RAB7A	0.293889	8.20754	19.7173	0.000915202	0.0132579
PEX5L	-0.407694	5.94785	21.4385	0.000918416	0.0132894
H3C8	-0.847569	3.70132	24.02	0.000922215	0.0133293
TMEM38A	0.800958	4.78555	31.7717	0.000923699	0.0133356
ALG8	-0.440886	5.78362	28.0152	0.000929378	0.0134024
PDE4D	0.363844	7.99937	19.602	0.000935559	0.0134763
GPR89B	0.729903	5.35298	19.5691	0.000941472	0.0135462
DNAJB11	0.409054	6.62968	19.4883	0.000956162	0.013742
IRF1-AS1	-0.394728	7.02591	19.4753	0.000958541	0.0137607
HHIP	-0.362518	6.39465	21.8052	0.000963698	0.0137881
TAF6	-0.652419	4.7102	27.4126	0.0009624	0.0137881
SLC2A13	0.554261	6.14167	19.4496	0.000963291	0.0137881
H2AC25	0.750385	4.8365	20.7386	0.000982699	0.0140315
ZNF397	-0.487378	5.57077	26.6081	0.000982907	0.0140315
ENSG00000272449	0.775935	5.31175	19.3224	0.000987188	0.0140622
SPG11	-0.366682	6.57053	19.3219	0.000987269	0.0140622
GSAP	0.536595	6.86519	19.3005	0.000991374	0.0141014
ENSG00000280145	-0.988321	3.65411	40.6635	0.000992229	0.0141014
OXSR1	0.51155	7.2483	19.2567	0.000999794	0.0141841
DPYSL2	0.350094	7.15998	19.2542	0.00100027	0.0141841
DIS3	0.369607	6.73378	24.9463	0.00100713	0.0142655
LINC02432	-0.936161	3.57764	33.7806	0.00100936	0.0142811
SLC35G1	-0.623941	5.0128	31.8168	0.00101352	0.0143242
ENSG00000291075	-0.326249	6.94917	19.1804	0.00101469	0.0143247
FARP2	0.573791	6.10749	19.1487	0.00102094	0.0143946
GIPR	1.24516	3.73977	25.5981	0.0010219	0.0143946
ENGASE	0.903435	4.57408	19.0405	0.00104266	0.014671
DGLUCY	-0.367605	6.36127	19.0325	0.00104428	0.0146775
VSIG4	-0.536176	5.65184	19.0231	0.00104621	0.0146884
ABCF1	0.30893	7.28545	18.9532	0.00106058	0.0148575
RUVBL2	0.359718	6.7854	18.9552	0.00106017	0.0148575
ORC1	0.585689	5.44376	19.2696	0.00106505	0.014871
CYLD	0.562028	6.45257	18.9355	0.00106427	0.014871
BAIAP2	0.649778	5.2594	25.9989	0.0010645	0.014871
SLC35E2B	-0.502462	5.48009	31.6672	0.00107828	0.0149464
GPANK1	-0.408506	5.89979	22.0985	0.00107703	0.0149464
EXT1	0.48556	6.71077	18.876	0.00107674	0.0149464
HIF1A-AS3	1.09592	4.74758	18.8743	0.00107709	0.0149464
ENSG00000291073	0.820889	5.85103	18.8735	0.00107726	0.0149464
NUPR1	0.428173	7.87631	18.8942	0.00107289	0.0149464
TIMP3	1.13308	5.40746	18.8669	0.00107866	0.0149464
DPY19L2P2	-0.702482	4.44059	32.9401	0.00108198	0.0149762
BMT2	1.0069	6.16929	18.8418	0.00108398	0.0149868
NAB2	0.769601	5.26697	18.8366	0.0010851	0.0149868
HLA-DRB6	0.453294	7.0542	18.7993	0.00109307	0.0150806
ARF5	-0.483224	5.79427	18.7682	0.00109978	0.0151567
FAM110A	0.626048	5.32705	22.3235	0.00111052	0.0152882
SLC39A10	-0.425345	5.94118	23.7322	0.00111193	0.0152912
TLE4	0.376446	6.86113	18.6983	0.00111502	0.0153172
LILRB5	0.755319	5.15243	18.6928	0.00111623	0.0153173
COPA	0.321158	7.3824	18.639	0.00112816	0.0154644
GPATCH3	0.717126	4.95835	29.5202	0.00112984	0.0154707
IRX5	0.768022	4.88644	26.1404	0.00113456	0.0155186
FLVCR1	0.65986	5.14496	23.6916	0.0011378	0.0155297
SLC25A45	-0.729887	4.2324	22.139	0.0011373	0.0155297
ASS1	-1.24817	2.82616	18.5712	0.00114342	0.0155896
BAALC-AS1	-0.769633	4.01798	27.3774	0.00114483	0.0155922
LEF1-AS1	-0.619354	4.91537	18.548	0.00114867	0.0155945
PRH1	-0.560922	4.95626	24.5344	0.00114641	0.0155945
E2F1	-0.548724	5.13529	31.8424	0.00114797	0.0155945
LINC00051	-0.792292	3.97642	24.4416	0.00115876	0.0157148
SIRPB2	-0.624394	4.7705	34.7525	0.00116302	0.0157558
EOLA1-DT	-1.02966	3.20609	25.8663	0.00116455	0.0157597
HLA-DMB	0.319802	8.16388	18.4626	0.00116833	0.0157941
MYLK-AS1	-1.37256	2.51875	28.4374	0.0011734	0.0158458
NRARP	2.44958	2.9302	24.4471	0.00117741	0.0158832
KANK1	0.801886	4.58202	25.1075	0.00118368	0.0159509
NCF1	1.21179	3.85231	19.618	0.0011865	0.0159552
ADGRE5	0.429155	6.4016	18.3861	0.00118627	0.0159552
ATP11B	0.384044	7.26886	18.3773	0.00118836	0.0159633
ZNF627	-0.641211	4.75376	20.1451	0.00119184	0.0159932
ENSG00000287042	-0.698841	4.31053	19.4452	0.00120236	0.0161174
ADAM9	0.416368	6.83481	18.3057	0.00120548	0.0161423
SEMA6B	1.11706	3.99355	39.9697	0.00122141	0.0163384
INPP5A	0.845677	5.7484	18.2137	0.00122791	0.0164082
BID	0.295867	7.50567	18.1556	0.00124233	0.0165835
FRMD4A	-0.447734	6.02455	18.1446	0.00124508	0.0166028
NLRC4	-0.85562	3.7689	22.6266	0.00125733	0.0167487
CAPS2	-0.727564	4.24576	32.44	0.00126146	0.0167861
HLA-DPB1	0.356846	8.27233	18.0603	0.00126641	0.0168298
INVS	-0.371767	6.84689	18.0561	0.00126748	0.0168298
ICOSLG	0.882569	4.86788	18.0513	0.00126871	0.0168298
MOSMO	0.399078	6.53163	18.9315	0.00127043	0.0168351
APBB1IP	-0.257027	7.78185	18.0168	0.00127758	0.0168948
ARMCX3	0.412601	6.38086	25.6568	0.00128415	0.0169642
RBM34	0.740258	5.03425	24.6044	0.00128584	0.0169688
TSPAN5	0.404203	6.66997	17.9633	0.00129148	0.0170256
MAPRE2	0.324983	7.0776	17.9462	0.00129598	0.0170673
TENT4A	0.553712	5.5489	20.7435	0.00130193	0.017128
ALCAM	0.691511	7.9688	17.9036	0.0013072	0.0171701
ATG101	0.508602	5.808	21.1535	0.00130917	0.0171701
ANKRD12	0.329799	7.99377	17.8974	0.00130886	0.0171701
WDR47	0.625145	5.37264	28.172	0.00131092	0.0171753
HSPA5	0.357915	8.04633	17.8781	0.001314	0.017198
KDM6B	0.532232	6.40064	17.8676	0.00131682	0.0172172
DAPK3	0.666721	5.18998	20.4624	0.00132306	0.0172811
LINC01215	-0.851634	3.7772	20.8411	0.00132592	0.0173008
EFNA1	1.68684	3.05983	31.7359	0.00133174	0.0173235
RALGPS2	0.608454	5.75904	17.8205	0.00132948	0.0173235
DOCK9	0.589339	5.68621	17.8163	0.00133063	0.0173235
NR4A2	1.25783	3.73272	19.2034	0.00135127	0.0175417
UST	0.541028	5.74909	17.7442	0.00135034	0.0175417
ALAS1	0.477276	6.57699	17.7289	0.00135455	0.0175664
VPS13B-DT	-0.779074	4.17486	17.6567	0.00137471	0.0178098
RYBP	0.615346	6.41556	17.5798	0.00139656	0.0180744
FERMT2	0.516918	5.71485	20.6262	0.00139809	0.0180759
TAF1D	0.320141	7.7149	17.5295	0.00141107	0.0182253
ENSG00000287989	-1.04537	3.07616	25.1205	0.00142023	0.018325
TBXAS1	-0.315014	6.82345	17.4883	0.00142311	0.018325
DNAJC1	0.360506	7.31355	17.4917	0.0014221	0.018325
PYGL	-0.416993	6.007	18.9069	0.00142533	0.0183351
CACHD1	0.932392	4.13721	27.345	0.00142709	0.0183392
B3GNT2	0.615969	7.18372	17.4504	0.00143427	0.018413
IFFO2	1.16332	3.98987	17.4303	0.00144024	0.0184339
CRTC3-AS1	-0.84762	3.65715	28.8555	0.00143838	0.0184339
OTOA	0.401438	6.81889	17.432	0.00143972	0.0184339
SATB1	-0.405972	5.89003	24.0156	0.00144996	0.0185186
ATP1B3	0.27975	7.62499	17.3993	0.00144948	0.0185186
CDK7	0.548338	5.76888	17.3887	0.00145267	0.0185186
TUBG1	-0.439464	5.71942	17.3902	0.00145221	0.0185186
CATSPER2	-0.661905	4.53659	31.7531	0.00145565	0.0185248
LRRC37A3	-0.835891	3.93544	25.0945	0.00145606	0.0185248
GSDME	0.398828	6.52142	24.3978	0.00145964	0.0185464
ALDH1A1	0.463466	7.11978	17.3622	0.00146067	0.0185464
MIA3	0.367565	6.98564	17.3442	0.00146612	0.0185971
P4HA1	0.422337	6.84033	17.3346	0.00146904	0.0186157
DCAKD	-0.515219	5.29554	31.9645	0.00147378	0.0186571
ENSG00000289609	1.73157	3.21827	22.2647	0.00147662	0.0186745
PPP1R13B	0.829495	5.91929	17.2738	0.00148768	0.0187958
PHF7	-0.529933	5.20771	25.6377	0.00149336	0.0188489
NDEL1	0.514368	6.08152	17.2214	0.00150398	0.0189641
GAS2L3	0.670353	6.66932	17.2166	0.0015055	0.0189645
ATR	-0.388515	6.63064	17.1895	0.001514	0.0190528
ZFAND3	0.406644	7.96982	17.1779	0.00151767	0.0190801
ENSG00000227598	-0.486821	5.28925	27.1001	0.00152134	0.0190905
ZNF440	0.716383	4.96254	31.1383	0.00152149	0.0190905
HSPA1A	0.464846	6.0815	17.1606	0.00152315	0.0190925
TJP2	0.769118	4.64133	21.0618	0.00152502	0.0190972
PRPF4B	0.299141	7.60822	17.1498	0.00152661	0.0190983
ARHGAP4	-0.388812	6.15832	19.956	0.00153301	0.0191596
LINC02273	-0.997224	3.19834	26.0826	0.00154041	0.0192333
ZNF460-AS1	-1.42213	2.30122	27.8812	0.00155463	0.0193729
RASSF2	0.548381	5.5915	17.0668	0.00155332	0.0193729
IGSF6	0.264572	8.65867	17.0559	0.00155687	0.0193818
NFAT5	0.50916	7.46763	17.0317	0.00156477	0.0194612
BRWD3	0.730069	6.49744	17.0098	0.00157199	0.0195319
VPS26A	0.333166	6.84653	17.2467	0.00157485	0.0195484
HPS4	-0.412113	5.94208	21.6632	0.00158194	0.0196173
CECR2	1.08935	3.78314	20.0915	0.00159186	0.0197212
NUP43	-0.530232	5.26653	30.7525	0.00159613	0.0197548
PXDC1	0.637619	5.30887	16.9232	0.00160086	0.0197942
PRKCD	0.647838	6.0016	16.9096	0.00160543	0.0198063
PIK3R5	0.835296	7.48972	16.9065	0.0016065	0.0198063
FAM118A	0.746698	4.77486	23.5079	0.00160437	0.0198063
NMRAL1	-0.343244	6.50917	16.8908	0.00161181	0.0198525
NUS1	0.407291	6.41852	17.4808	0.00161507	0.0198735
XPR1	0.41149	6.62334	16.8546	0.00162416	0.0199469
LENG8-AS1	-0.996701	3.27342	31.3009	0.00162264	0.0199469
TNNT1	-0.644463	4.55388	20.447	0.00162706	0.0199632
CENPV	-0.408138	6.37375	16.8408	0.0016289	0.0199665
CHD1-DT	-1.0506	3.71801	16.8321	0.0016319	0.0199841
EXO1	0.456384	5.94692	23.0636	0.00163467	0.0199981
PIGB	-0.656686	4.59257	29.3605	0.00163618	0.0199981
AP5Z1	0.596414	5.46471	21.2488	0.00164678	0.0201084
SNX10	0.341215	6.98396	16.7804	0.00164983	0.0201264
RELCH	0.537915	6.66536	16.7278	0.00166832	0.0203131
CEBPB	0.686029	8.12907	16.7299	0.00166757	0.0203131
PRAME	-0.478534	5.53567	16.7175	0.00167195	0.0203378
CNNM4	0.671563	5.11072	17.4666	0.00168429	0.0204684
FNIP2	0.435349	7.69228	16.6775	0.00168623	0.0204724
MSH4	-0.850667	4.13179	16.6446	0.00169806	0.0205573
ATP2A2	0.390918	6.81133	16.6473	0.00169708	0.0205573
PITPNA	0.351373	7.03735	16.6495	0.0016963	0.0205573
ZNF574	0.823	4.65132	23.0831	0.00170472	0.0206184
RNASE1	0.389182	8.65333	16.5939	0.0017165	0.0207412
ZNF467	-0.61511	4.68237	21.9787	0.0017199	0.0207626
SEC61A2	0.840273	4.5553	21.9975	0.0017235	0.0207863
PDLIM5	0.615423	6.57506	16.5615	0.00172838	0.020805
BCL11B	-0.26231	7.3869	16.5623	0.0017281	0.020805
RAB8B	0.290945	7.48431	16.5573	0.00172994	0.020805
NLRC3	-0.623702	4.66311	20.2056	0.00173167	0.0208062
GDAP2	0.594051	6.17595	16.5062	0.00174892	0.0209936
KCTD19	-0.83358	3.7797	31.2415	0.00178196	0.0213702
ZCWPW2	-0.667263	4.39972	31.885	0.00180288	0.0215804
SDCBP	0.264531	8.22789	16.3434	0.0018111	0.0216585
DLEU7	0.943226	4.38483	20.1586	0.00181694	0.021708
LINC02340	-0.924357	3.41195	17.5174	0.00182004	0.0217246
TMEM144	-0.623031	4.74586	25.3814	0.00183043	0.0218281
A2M	-0.324979	7.01181	16.2773	0.00183708	0.021887
NIFK-AS1	-0.611482	4.97817	16.2698	0.00184004	0.0219018
RIT1	0.394548	6.40814	17.1611	0.001846	0.0219374
ENSG00000288018	-1.13312	2.85731	26.8175	0.00184647	0.0219374
TCP1	0.251791	7.90158	16.2372	0.00185305	0.0219951
BAZ1A	0.334348	7.91517	16.231	0.00185552	0.0220039
MTAP	-0.445213	5.65257	22.9458	0.0018785	0.0222557
SYTL3	-0.644657	4.48339	23.2791	0.00188375	0.0222971
ENSG00000259986	-0.904486	3.48318	33.1597	0.00189548	0.0224152
TIMELESS	-0.470488	5.46355	28.9303	0.00190217	0.0224735
OR3A2	-0.632235	4.45995	24.591	0.00190466	0.022482
SLCO3A1	0.344987	6.60384	16.8177	0.00190742	0.0224938
H1-2	-0.328101	7.65754	16.0844	0.00191545	0.0225676
DUSP10	0.723319	5.65179	16.0785	0.00191789	0.0225755
HES4	-0.308436	7.5511	16.0524	0.00192881	0.0226831
DHX36	0.282615	7.54159	16.0275	0.00193933	0.0227648
GDF11	0.605891	5.3537	16.0302	0.00193818	0.0227648
LINC03006	-0.51013	5.38593	15.9907	0.00195493	0.0229099
PTGIR	0.92881	4.41025	29.8225	0.00195529	0.0229099
ABTB3	0.71806	5.28657	15.9822	0.00195855	0.0229271
PSMG4	-0.577055	5.22544	15.9661	0.00196547	0.022987
TWSG1	0.549377	6.20157	15.9442	0.00197489	0.023076
LRRC34	-0.784609	3.92168	36.5403	0.00197868	0.0230991
ENSG00000234147	-0.703589	4.30066	15.9152	0.00198744	0.0231801
H2BC4	-0.802863	3.8562	15.8879	0.00199936	0.0232535
NFE2L3	0.65376	5.11991	15.8794	0.00200312	0.0232535
DNAJC24	0.636497	5.96292	15.8758	0.00200467	0.0232535
IL18	0.363624	6.8678	15.8937	0.00199684	0.0232535
CRTAM	-0.662353	4.73604	15.8893	0.00199878	0.0232535
FPR1	0.672362	5.07183	31.361	0.00200246	0.0232535
RSKR	-0.700051	4.30479	29.471	0.00202617	0.0234815
RBM48	-0.359422	6.37769	15.8208	0.00202902	0.0234932
SKA3	-0.511729	5.49851	15.8145	0.00203182	0.0235043
TYW1	0.450049	6.41017	15.8069	0.00203522	0.0235221
TOB2	0.478529	5.95119	18.2915	0.00203997	0.0235558
SUSD4	-0.383971	6.00229	15.9463	0.00205357	0.0236913
ZNF101	-0.533902	5.1057	28.4964	0.00205547	0.0236918
EPB41L5	0.517518	5.93765	15.7534	0.00205931	0.0237147
MOB3C	1.30165	3.97235	15.6874	0.00208952	0.0240408
CTSC	0.274409	8.23837	15.6799	0.00209296	0.0240587
NOS1AP	1.52706	3.01275	16.0111	0.00209549	0.0240661
SLA	-0.284571	6.96676	15.6486	0.00210752	0.0241825
RC3H1	0.451317	7.15123	15.6362	0.00211328	0.0242267
STARD5	1.23252	3.68403	23.1712	0.00214761	0.0245982
GFRA1	-0.607219	4.58474	22.3595	0.00215361	0.0246448
ZNF345	-0.6345	4.60728	24.682	0.00215581	0.0246477
RDM1	-1.18609	2.72659	27.4177	0.00216447	0.0247246
ENSG00000284634	-0.652827	4.31006	22.2142	0.00218468	0.0249331
PPARD	0.790686	6.25199	15.4789	0.00218837	0.0249529
H1-0	0.384911	6.57679	15.4612	0.00219703	0.0250249
MAGED1	-0.366306	6.19638	17.6977	0.00219861	0.0250249
LINC02908	-1.18394	2.6539	25.3503	0.00220266	0.0250263
NAE1	-0.297321	6.84157	15.4533	0.00220091	0.0250263
MAML2	0.506002	8.0423	15.4347	0.00221005	0.0250879
ENSG00000240291	-0.855122	3.59268	36.9335	0.00222145	0.0251725
SCARB1	0.398648	6.34057	18.2584	0.00222128	0.0251725
PWWP2A	0.479967	6.1243	15.3559	0.00224932	0.0254657
SELENOP	0.300189	8.21421	15.3506	0.00225196	0.0254729
PCF11	0.342582	6.63683	16.1254	0.00225464	0.0254807
MZB1	-0.411798	6.67165	15.3268	0.00226399	0.025541
TALAM1	0.579939	7.59205	15.3294	0.00226269	0.025541
ERP27	-0.845313	3.70212	19.8867	0.00227423	0.0256338
PPP1R15B	0.483972	6.16615	15.2896	0.00228298	0.0256776
RABL2A	-0.774263	3.97946	30.4584	0.00228416	0.0256776
FXYD6	0.50695	5.82658	17.0048	0.00228024	0.0256776
MAST1	-0.523089	5.11103	26.1299	0.00228734	0.0256907
PABPC4	0.265796	7.77888	15.261	0.00229767	0.0257614
TSPOAP1-AS1	-0.58722	4.70124	28.6613	0.00229702	0.0257614
CD2	-0.332845	6.72899	15.2388	0.00230915	0.0258446
VAV2	0.612935	5.07232	19.5516	0.00230811	0.0258446
HLA-DMA	0.314777	8.01413	15.2269	0.00231537	0.0258688
SAMD8	0.569126	6.12407	15.1754	0.00234237	0.0261247
CTR9	0.29433	7.13011	15.723	0.00234075	0.0261247
CCDC170	-0.681064	4.34128	16.8239	0.00234669	0.02615
AGPAT4	0.613387	6.04487	15.1363	0.00236312	0.0262947
CSPP1	0.368739	6.83944	15.1312	0.00236586	0.0262947
ZNF410	0.431113	6.09505	18.9777	0.00236541	0.0262947
MLKL	0.536314	5.71699	15.1265	0.00236833	0.0262992
RAP2C	0.605028	5.17883	27.5751	0.00237209	0.026318
CRIM1	0.973698	4.6672	15.0718	0.00239785	0.0265806
LRP8-DT	-1.27962	2.39116	31.3464	0.00240304	0.0265946
RBM41	-0.351594	6.30871	20.3758	0.00240327	0.0265946
CLEC12A	-0.527533	5.03659	17.6515	0.00240824	0.0266264
SPNS3	-0.560419	4.80032	19.5662	0.00241911	0.0267234
PI16	0.351545	6.67435	14.9929	0.00244111	0.0269431
DIPK2A	0.497754	5.73077	21.0754	0.00244699	0.0269847
NPAS2	0.783334	5.7184	14.9666	0.00245571	0.0270408
AP1G1	0.393497	6.45404	14.9656	0.00245632	0.0270408
CCDC186	0.377065	6.37551	19.1113	0.00246264	0.0270869
PTPN22	-0.402114	6.20131	14.9473	0.00246653	0.0270993
GK	0.410087	6.12677	22.4909	0.00246802	0.0270993
MOB4	0.350242	6.5796	20.1804	0.00247148	0.0271002
MREG	0.833787	6.04638	14.9349	0.0024735	0.0271002
LNX2	0.587746	5.30226	16.8817	0.00247448	0.0271002
GADD45A	0.685302	5.12548	14.9235	0.00247994	0.0271135
ZBTB11	0.401745	6.47736	14.9247	0.00247925	0.0271135
MECR	-0.643966	4.49923	32.1889	0.00251371	0.0274356
TMEM11-DT	-1.05422	2.883	21.5351	0.00251214	0.0274356
EGR2	1.48333	5.42239	14.8457	0.00252433	0.027528
KBTBD8	1.12286	3.81979	26.1224	0.00253719	0.0276446
MHENCR	-0.784228	3.90025	18.0406	0.00255401	0.027804
DISP1	-0.386626	5.99407	14.7833	0.00256062	0.0278413
LINC02185	-0.94901	3.92101	14.7813	0.0025618	0.0278413
KIF3A	-0.335582	6.43741	18.9701	0.00256471	0.0278491
ESR2	1.16814	3.46666	26.849	0.00257795	0.0279692
CSRP1-AS1	-0.697376	4.43426	14.7478	0.00258158	0.0279847
RAB37	-0.681407	4.27088	16.9904	0.00258879	0.028039
SMC1B	-0.396676	5.84997	14.712	0.00260286	0.0281675
FAM107B	0.336488	7.32799	14.6991	0.00261062	0.0282274
LYPLAL1	-0.33119	6.44791	17.1874	0.00262073	0.0282657
BTAF1	0.435872	6.89959	14.687	0.0026179	0.0282657
HAMP	0.528619	5.68592	16.7276	0.00262081	0.0282657
ENSG00000225218	-1.09741	2.86556	30.3838	0.00263323	0.0283757
FKBP5	0.472101	6.80482	14.6445	0.00264364	0.0284564
ZBTB46	1.09365	5.19368	14.636	0.00264876	0.0284708
TEX14	-1.00776	4.6747	14.6034	0.00266881	0.0286621
CDCA7	-0.440096	6.48573	14.5858	0.00267965	0.0287543
SLC39A14	0.792491	4.54421	15.4866	0.00269527	0.0288491
EPHX2	-0.685219	4.25285	24.1081	0.00269387	0.0288491
AMZ2	-0.339045	6.39141	19.95	0.00269076	0.0288491
GCNA	-0.836947	3.70104	14.5503	0.00270169	0.0288936
FSCN1	0.608657	5.22858	21.687	0.00270909	0.0289308
MBTD1	-0.335996	6.3719	21.1905	0.00271039	0.0289308
ICAM3	-0.414406	5.89161	14.5339	0.00271198	0.0289308
MEX3B	1.08882	3.87312	29.1988	0.00271465	0.0289351
ATP6V1H	0.384853	7.22708	14.5058	0.00272972	0.0290714
HERC2P7	-1.00999	3.38014	18.8971	0.0027339	0.0290916
ENSG00000286746	-0.729985	3.95967	21.4366	0.00274624	0.0291985
PPP2R1B	0.485957	5.7279	20.6017	0.0027538	0.0292545
ENSG00000289007	-0.732637	4.00086	23.8031	0.00277163	0.0294194
BBS2	-0.630145	4.58294	30.3025	0.00277789	0.0294614
KIF1B	0.624728	7.05248	14.381	0.00281	0.0297277
ULBP1	1.3037	4.62893	14.3878	0.00280559	0.0297277
CCDC85C	0.939697	3.97294	24.2638	0.00280938	0.0297277
YWHAG	0.269985	7.34595	14.3726	0.0028155	0.0297612
MAN2A1	0.38752	6.7725	14.3685	0.00281817	0.0297648
SPC24	-0.515089	5.05303	17.179	0.00282275	0.0297884
TMEFF1	0.699203	5.27392	14.3289	0.00284436	0.02996
ZNF652	-0.340862	6.30261	17.1017	0.00284841	0.02996
DUS1L	-0.415896	6.17676	14.3254	0.0028467	0.02996
DHRS7B	-0.367948	6.09959	14.6871	0.00287665	0.0302321
LINC02482	-0.687591	4.25577	17.9926	0.00288171	0.0302603
ZNF594	-0.748371	3.85414	25.3595	0.00288997	0.0303203
STX16	-0.304249	6.70036	18.3203	0.00289218	0.0303203
MYO7B	-0.301521	7.3593	14.2466	0.00289966	0.0303488
STARD4	0.609458	5.13861	19.6708	0.0028996	0.0303488
ZCCHC10	0.383919	6.34076	15.7092	0.00292394	0.0305779
UBA6-DT	-0.404726	5.99893	14.1998	0.00293164	0.0306332
BOLA1	-0.578885	4.67609	28.545	0.00294217	0.0306679
CITED2	-0.400908	6.00648	14.189	0.00293905	0.0306679
VPS37C	0.800939	5.14869	14.1854	0.00294157	0.0306679
ID3	0.320139	7.29124	14.1733	0.00294997	0.0306946
TRIM66	-0.536557	4.98756	21.6295	0.00294832	0.0306946
VMP1	0.351645	7.5974	14.1669	0.00295437	0.0306946
MYADM	0.358351	6.69219	14.1697	0.00295245	0.0306946
GLI4	-0.725715	4.15061	18.0084	0.00296573	0.0307876
HERPUD1	0.355615	7.08774	14.141	0.00297246	0.0308323
RHOQ	0.283797	7.38218	14.1316	0.00297904	0.0308754
TULP4	0.318845	6.86556	14.1268	0.00298242	0.0308853
TMED5	0.319001	6.82954	18.4587	0.00299652	0.0310062
RFTN1	0.480007	6.05035	14.0497	0.00303711	0.0313536
PRKCQ-AS1	-0.539766	5.39447	14.0492	0.00303747	0.0313536
PRIM2	0.39469	7.16559	13.9995	0.00307342	0.0316772
SLC16A13	1.07833	3.86164	14.2281	0.00307379	0.0316772
ABCC3	-0.470716	5.4958	13.9933	0.00307793	0.0316942
NLRP3	0.775023	4.40639	28.0364	0.00308388	0.0317298
SLC66A2	0.42464	6.27752	13.9548	0.00310611	0.0319328
SYNE1	-0.425242	5.91804	13.9168	0.00313423	0.0321751
APAF1	0.510686	5.97747	13.9156	0.00313519	0.0321751
GPR132	1.38354	3.45979	13.8925	0.00315246	0.0323051
BHLHE41	0.373483	6.31254	16.1251	0.00316089	0.0323395
RP2	0.533576	5.42505	16.8801	0.00315887	0.0323395
FAM177A1	0.33294	6.71153	14.8948	0.00318971	0.0326082
SMURF2	0.367304	7.2269	13.839	0.00319283	0.0326139
SPINT1	-0.560719	4.78384	17.6806	0.00319818	0.0326424
CNR2	-0.451996	5.36163	16.2479	0.00320365	0.0326721
ENSG00000248774	-1.01802	3.12013	16.1547	0.00321421	0.0326796
ZBED3	-0.369426	6.09044	16.2068	0.00320871	0.0326796
KIF24	-0.585984	4.48853	22.8143	0.00321341	0.0326796
ARHGEF6	-0.289371	6.79624	14.2984	0.00321464	0.0326796
ENSG00000286703	3.0916	2.54717	16.6928	0.00322526	0.0327614
UBE2D1	0.321826	6.77342	14.8973	0.00323541	0.0328383
HLA-DPA1	0.30479	8.37982	13.7801	0.00323807	0.0328392
ZFYVE9	0.479759	5.53919	13.7738	0.00324297	0.0328628
APPAT	-0.379544	6.25298	13.7686	0.00324698	0.0328772
ENSG00000260911	1.11807	3.92993	13.7329	0.0032748	0.0331065
MED26	0.678284	4.94268	19.6572	0.00327482	0.0331065
MPEG1	0.410685	6.33447	13.7059	0.00329606	0.0332949
DAPK1-IT1	1.86012	2.90858	13.6913	0.00330768	0.0333858
ITGB3BP	-0.337362	6.25965	20.9656	0.00331528	0.0334361
TAF13	0.506011	5.62378	17.207	0.00334068	0.0336165
SERPINE2	0.9189	4.06433	24.6804	0.00334108	0.0336165
LINC00662	-0.549372	5.16867	13.6531	0.0033381	0.0336165
MFSD6	-0.362853	6.0985	17.7835	0.00334961	0.0336691
ENSG00000288928	1.02946	4.25216	13.6331	0.00335419	0.0336691
HEXIM1	0.421479	6.16081	14.5024	0.00335423	0.0336691
FSIP2-AS1	-1.25168	2.53079	13.6199	0.00336486	0.0337492
KDM6A	0.419684	6.41913	13.6122	0.00337113	0.0337855
SSRP1	-0.270853	7.49931	13.6058	0.00337633	0.033811
HACL1	0.450828	5.85992	20.346	0.00338183	0.0338129
TSPAN33	0.5637	5.30006	21.8934	0.00338115	0.0338129
SLC15A3	0.357445	6.73996	13.5903	0.00338896	0.0338577
DCP1A	0.380141	6.67796	13.5751	0.00340139	0.0339553
RECK	-0.673201	5.20583	13.5636	0.00341088	0.0340234
C15orf40	-0.36834	6.19792	13.5449	0.00342624	0.0341499
ERBIN	0.366698	7.89716	13.5371	0.00343278	0.0341883
MAP3K5-AS2	-0.574101	4.74636	15.9936	0.00345419	0.0343747
TANC1	0.754447	4.4319	20.057	0.00346987	0.0343965
TMEM80	-0.605228	4.70222	17.2887	0.00346153	0.0343965
ZNF280D	-0.355534	6.10587	19.8268	0.00346766	0.0343965
DNASE1	-0.48577	5.15484	23.8821	0.0034664	0.0343965
ENSG00000225689	-0.748609	4.3047	13.5007	0.00346307	0.0343965
SLC2A11	-0.790036	3.80844	28.9338	0.00347792	0.0344495
SRSF6	0.341213	6.62912	17.932	0.00348216	0.0344647
RNF138	0.36651	6.39639	13.4573	0.00349965	0.0346109
ADCYAP1	-0.386818	5.87943	15.8016	0.00351203	0.0347065
CROCCP3	-0.646205	4.37758	24.9295	0.0035166	0.0347247
ENSG00000286863	-1.00729	3.00714	20.8581	0.00351981	0.0347295
ARIH1	0.338051	7.52982	13.4132	0.00353732	0.0348753
HCP5	1.03652	3.81168	23.3909	0.0035409	0.0348836
ITFG2	-0.430812	5.59028	23.6101	0.00354498	0.0348969
HELB	0.623247	5.0172	22.7098	0.00355232	0.0349345
RRN3	0.469726	5.7749	13.3935	0.00355429	0.0349345
FAXDC2	-0.99387	3.0559	32.9892	0.00356666	0.035002
PPME1	0.319402	6.80611	14.1391	0.00356504	0.035002
PIGU	-0.460779	5.33039	24.5084	0.00356939	0.035002
ENSG00000249870	2.09997	3.05028	13.3679	0.00357653	0.0350451
FLACC1	-0.975618	3.17964	15.2956	0.00359091	0.0351589
SKI	0.684297	4.94459	13.3445	0.00359694	0.035191
NHLRC3	-0.394869	5.86573	16.7369	0.00360785	0.0352706
PPP1CB	0.27724	7.17562	14.6636	0.00363241	0.0354835
OTUD1	1.03744	4.7565	13.2883	0.00364653	0.0355942
ENSG00000243176	-0.755556	3.87413	16.8443	0.00367189	0.0358142
PDHX	0.434364	5.91391	15.1137	0.00367927	0.03584
MAP2K4	0.369444	6.70179	13.2508	0.00368015	0.03584
TRAF3IP3	-0.304462	6.57452	16.2942	0.00368298	0.0358402
PARD6A	-0.675319	4.18899	31.291	0.00369183	0.0358989
RASA3	0.448865	6.00619	13.2149	0.00371263	0.0360736
STRAP	0.300166	6.92155	16.6154	0.00372742	0.0361898
ENSG00000259972	-0.403549	5.74487	14.9069	0.00373892	0.0362738
RCOR1	0.309141	7.01624	13.1727	0.00375126	0.0363658
MARF1	-0.357722	6.15699	15.8504	0.00376148	0.0364372
PPM1D	0.392354	6.19199	16.2609	0.00376517	0.0364452
G3BP1	0.257728	7.60313	13.1543	0.00376828	0.0364477
DHX37	0.600497	5.19114	13.1393	0.00378219	0.0365545
PMS2P4	-0.376157	5.98723	13.1131	0.00380661	0.0367348
PAG1	0.4239	7.04324	13.1146	0.0038052	0.0367348
ZNF678	-0.436372	5.47474	20.8778	0.00381802	0.0367892
EMID1	-0.57041	4.71214	13.1028	0.0038163	0.0367892
MYO1G	-0.340258	6.25819	13.0656	0.00385146	0.0370834
ZNF213-AS1	-0.778753	3.80524	19.578	0.00393041	0.0377865
YPEL4	-0.880834	3.34867	26.595	0.00394589	0.0378782
MAPRE1	0.325599	6.6433	19.4212	0.00394589	0.0378782
MAD1L1	0.295983	6.91552	12.9642	0.00394923	0.0378817
RAB33B-AS1	-0.439755	5.46919	21.7532	0.00397728	0.0381046
NCOA4	0.256585	7.33826	13.9048	0.00397845	0.0381046
MSMO1	0.465302	5.7558	12.9137	0.00399904	0.0382677
ZC3H6	-0.407686	5.63349	13.301	0.00400946	0.0383153
MMP19	1.07689	4.7029	12.8921	0.00402048	0.0383919
MLIP	-1.09712	2.52203	15.0101	0.00403428	0.0384948
GFM2	0.59425	5.74914	12.8683	0.00404436	0.0385453
SMURF1	0.671389	6.34871	12.8641	0.00404865	0.0385453
PTPRE	0.503704	7.50702	12.8652	0.00404754	0.0385453
MMAB	-0.506398	5.12083	14.6121	0.00407377	0.0387555
HGSNAT	-0.375922	5.92982	16.2908	0.00408677	0.0388502
FCGR2A	0.388546	6.24952	18.8892	0.0040932	0.0388532
PARD6G	1.15292	3.59361	12.8172	0.00409623	0.0388532
SPACA6	0.813452	4.45778	21.6189	0.00409042	0.0388532
MTUS1-DT	-1.28646	2.5579	12.8002	0.00411365	0.0389895
PALM2AKAP2	0.291153	7.35978	12.796	0.00411795	0.0390012
TMEM260	-0.417448	5.68383	12.8358	0.00412859	0.0390439
KLF2	0.375456	6.37477	13.0628	0.00412821	0.0390439
SPATA13	0.492831	6.1156	12.7635	0.0041515	0.0392315
TXNDC11	0.49167	5.58918	15.8856	0.00416013	0.039284
SESN1	0.588625	6.22928	12.751	0.00416455	0.0392965
DIPK1A	-0.396686	5.62782	13.9945	0.00419547	0.0395591
NOTCH2	0.517402	6.94648	12.6938	0.00422459	0.0397584
FADS2	-0.366091	5.95655	18.0292	0.00422597	0.0397584
MX1	0.910559	5.91125	12.6954	0.00422297	0.0397584
UBE2O	0.439603	6.18022	12.6879	0.00423084	0.0397749
OSTM1	0.344316	6.53175	14.1464	0.00424501	0.0398787
CMTM6	0.270705	7.20218	13.0989	0.0042537	0.0399305
HYAL2	-0.604509	4.47158	20.6272	0.00425679	0.0399305
GALNT18	0.595	4.94774	12.6507	0.0042706	0.0400306
C5AR1	0.427295	7.82045	12.642	0.00427989	0.0400882
RAB11FIP1	0.272258	7.18979	12.6181	0.0043057	0.0403003
STX4	0.32668	6.65228	12.6535	0.00431534	0.0403313
ENSG00000291067	0.815072	4.33263	19.9038	0.0043125	0.0403313
TNFRSF14	0.262641	7.38408	12.6005	0.00432627	0.0404039
LCOR	0.366121	7.09511	12.5838	0.00434313	0.0405317
SNCA	0.352428	6.52623	12.579	0.00434833	0.0405401
STK24	0.286651	6.99582	12.5772	0.00435039	0.0405401
SFXN2	-0.71865	3.942	24.0453	0.00435886	0.0405893
BACE1	-0.765161	3.77302	15.1109	0.0043704	0.0406671
CADM2	-0.57182	4.62992	18.5393	0.00438901	0.0408104
KANSL1L-AS1	-0.634967	4.49177	23.1826	0.00442089	0.0410166
GBE1	0.363856	6.48148	12.5059	0.00442936	0.0410166
ENSG00000279277	-0.920807	3.30865	25.8354	0.00442677	0.0410166
ENSG00000289152	2.86796	3.10062	12.5165	0.00441758	0.0410166
PPP6R3	0.377532	7.28838	12.5134	0.00442096	0.0410166
PRIM1	-0.366846	6.15493	12.5049	0.00443049	0.0410166
PPFIBP1	0.415056	5.99647	18.1488	0.00443572	0.0410352
DAZAP2	0.301219	7.33257	12.4712	0.00446847	0.0413083
NRP1	-0.402179	6.75051	12.4674	0.00447279	0.0413182
C1orf56	0.694817	5.83935	12.4605	0.00448067	0.0413611
TP53BP2	0.358029	6.35557	14.4792	0.00449909	0.0413748
NMT2	0.493334	5.4888	15.4007	0.00449198	0.0413748
PPCDC	-0.387148	5.76127	18.9198	0.00449165	0.0413748
ZNF235	-0.462289	5.31202	24.8522	0.00450171	0.0413748
CD40	0.633341	4.90293	18.0102	0.00450812	0.0413748
DPM1	0.326584	6.68807	14.857	0.00450555	0.0413748
TPTEP1	-0.282495	6.80041	12.4389	0.00450525	0.0413748
OASL	1.29995	3.60781	12.4203	0.00452654	0.041484
PI4KB	0.434307	5.89039	14.7095	0.00453365	0.0415193
NDUFAF2	0.372994	6.24441	16.6563	0.00453898	0.0415384
EMSY-DT	-0.804682	3.6942	19.8229	0.00454342	0.0415491
TSTD3	-0.594723	4.67612	24.1868	0.0045528	0.0416051
NAPEPLD	-0.633454	4.44041	24.6679	0.00457505	0.041737
PLAG1	0.886112	4.09859	21.5933	0.00458033	0.041737
DYNC2I2	-0.407731	6.21032	12.3746	0.00457955	0.041737
ZNF133	-0.55092	4.64923	22.7274	0.00457295	0.041737
TP53I11	-0.488831	5.10965	22.3617	0.00459167	0.0418105
APOBEC3A	0.725901	4.6098	13.6629	0.00463054	0.0421343
LINC02422	-1.08435	2.83009	22.7989	0.00465475	0.0423244
DYRK1A	0.415553	7.22461	12.3064	0.00465979	0.04234
MYCN	1.40977	3.08109	20.056	0.0046632	0.0423408
SHB	0.594898	5.10557	17.9456	0.00467448	0.0423603
ZNF367	-0.468108	5.14461	22.7693	0.00467431	0.0423603
TAF4B	0.665079	4.84397	12.2934	0.00467531	0.0423603
ENSG00000265943	-1.12074	2.53386	15.4269	0.0047223	0.0427556
DHFR	-0.266157	7.04446	12.2456	0.0047329	0.0427673
H2AC7	-0.829942	3.33558	23.5591	0.00473097	0.0427673
NCAPD2	-0.349459	6.05952	19.5614	0.00473946	0.0427673
UPF3B	0.296483	6.80254	13.5059	0.00474036	0.0427673
NPC1	0.455511	7.14857	12.2337	0.00474732	0.042774
P2RY8	-0.351522	6.81685	12.2333	0.00474782	0.042774
EIF3J	0.274859	7.16299	12.2267	0.00475581	0.0428157
TADA3	-0.320495	6.65562	12.2148	0.00477032	0.042885
AIG1	-0.358444	6.00485	16.8871	0.00477045	0.042885
MFSD3	-0.833738	3.64065	17.2288	0.00478769	0.0429813
GLUD1	0.280505	7.10514	12.1866	0.004805	0.0430458
RNASEH2B-AS1	-1.05567	2.77376	26.5928	0.00480421	0.0430458
RHPN2	1.38329	3.20284	15.1807	0.00482958	0.0432356
ZSWIM6	0.511366	7.34602	12.1399	0.00486307	0.0433987
NLRX1	-0.722671	3.94278	22.3543	0.00485215	0.0433987
SBNO2	0.536722	5.4092	16.9856	0.00486482	0.0433987
CRYZL1	-0.363156	6.06179	13.2866	0.0048582	0.0433987
IGLL1	-0.43125	5.59222	12.1423	0.00486002	0.0433987
CCSER1	0.469818	5.51913	19.0909	0.00487248	0.0434062
PHKG1	0.732438	4.50936	13.9445	0.00486923	0.0434062
LGALS2	-0.471926	5.49278	12.1253	0.00488135	0.043455
CALU	0.268263	7.32938	12.1222	0.00488527	0.0434595
CAMK2G	0.441092	6.53658	12.1124	0.00489764	0.0435392
CCL18	1.28372	3.61878	12.0943	0.0049205	0.0437119
ENSG00000232053	-0.323163	6.19272	15.8466	0.00492833	0.0437509
LENG8	-0.546649	4.86172	12.5476	0.00493297	0.0437616
SYNC	0.738473	4.46923	12.3999	0.00494212	0.0437819
VIPR2	0.550301	5.43414	12.0789	0.00494016	0.0437819
C5orf22	0.442727	5.83656	19.771	0.00496208	0.0439282
GMNN	0.280861	7.13961	12.0403	0.00498968	0.0441418
RNF215	-0.727762	3.88606	21.4863	0.00499976	0.0442004
CLCN5	0.494386	5.44778	18.6316	0.00501311	0.0442877
GANC	-0.497853	4.97571	14.226	0.00501976	0.0443011
UBE2H	0.355455	7.12086	12.0007	0.00504097	0.0444414
ARSB	0.597873	6.38581	11.9885	0.00505694	0.0445514
TXNL4B	0.662957	4.85411	23.4775	0.00511138	0.0449999
UFL1-AS1	-0.943596	3.14591	28.9237	0.00512673	0.0451039
LACTB	0.256285	7.28073	12.6296	0.00514047	0.0451936
BTN2A2	0.528576	5.30693	20.7612	0.00515116	0.0452564
MFN1	0.417294	5.90488	12.4676	0.00519167	0.0455808
GEMIN4	-0.813864	3.45981	21.3876	0.00519787	0.0456039
RALGDS	0.447937	5.73857	19.721	0.00523135	0.045866
SOX11	-1.25396	2.32462	17.2562	0.00524875	0.0459869
VPS51	-0.361841	6.00733	12.853	0.00526097	0.0460005
DNAJC15	0.283036	7.29018	11.8342	0.00526419	0.0460005
SREBF1	0.485448	5.57625	11.8367	0.00526066	0.0460005
RNF185	0.591656	5.44114	11.8338	0.00526472	0.0460005
PHF8	0.494579	5.39136	13.3507	0.00529237	0.0461787
ENSG00000289698	-1.24339	2.42439	23.8699	0.00529606	0.0461793
VPS45	-0.338499	6.18835	17.474	0.00530836	0.0462234
PRIMPOL	-0.514584	4.91754	14.8617	0.00530686	0.0462234
TEAD1	0.505122	5.25833	17.569	0.00531565	0.0462237
ATG2B	0.529603	5.54144	11.7915	0.00532324	0.046244
RRBP1	0.334551	7.28472	11.79	0.00532524	0.046244
RGS18	-0.563424	4.59269	14.2258	0.00534699	0.0463067
KIAA1549	-0.464671	5.16448	19.3649	0.00534485	0.0463067
AAMDC	0.417065	6.30085	11.777	0.00534339	0.0463067
EPG5	0.416282	6.11305	11.777	0.00534344	0.0463067
FAM227B	-0.73027	3.83616	29.8522	0.00535352	0.0463318
HSPB1	0.276604	8.25529	11.7649	0.00536041	0.0463381
VPS37B	0.471115	6.05856	11.7641	0.00536153	0.0463381
ASF1A	-0.329218	6.08609	13.1422	0.00537392	0.0464138
GPR84	1.13106	3.59908	11.7522	0.00537835	0.0464206
JADE1	-0.441199	5.29146	19.6184	0.00542301	0.0467744
PRPF18	0.322524	6.6185	17.3028	0.00544335	0.0469181
PTGER3	1.35588	3.10964	13.6818	0.00546437	0.0470674
NEK10	-0.663151	4.06789	25.4801	0.00548329	0.0471985
GTSE1	-0.369283	6.18589	11.6741	0.00548974	0.0472221
ENSG00000289198	3.34921	2.73932	11.6658	0.00550169	0.0472612
CCNK	0.283584	6.95838	14.5997	0.00550135	0.0472612
IRF9	0.430168	5.83751	13.2534	0.00551261	0.0473231
CDS2	0.375523	6.12171	17.0057	0.00553289	0.0474652
RCL1	0.54243	5.25581	15.9338	0.00553822	0.047479
ADTRP	0.990709	3.88125	24.6639	0.00554352	0.0474925
SLC25A44	0.722596	4.49025	15.6902	0.00557854	0.0475952
ACSL3	0.307988	7.24402	11.6183	0.0055711	0.0475952
GUSBP1	-0.40361	5.65493	13.1111	0.00556322	0.0475952
PTER	-0.35346	6.03247	16.3243	0.00557752	0.0475952
SLC41A2	0.785794	4.57895	11.6111	0.00558164	0.0475952
TECPR2	-0.551013	5.17808	11.6114	0.00558116	0.0475952
MX2	0.587392	5.80028	11.622	0.00556565	0.0475952
LRRC1	0.405465	6.00496	11.5995	0.00559881	0.0477096
WDR54	-0.418988	5.50601	13.1459	0.00561898	0.0478495
KLHL23	-0.299244	6.55029	11.5634	0.00565247	0.0481026
ELOVL4	0.488296	5.40113	18.6385	0.00567552	0.0482666
ITPKB	0.629444	6.17475	11.5407	0.00568647	0.0482952
DEDD2	0.613258	5.86231	11.5422	0.00568424	0.0482952
ATP8A1	0.467562	6.18519	11.5305	0.00570196	0.0483946
SNX9	0.521853	6.82257	11.5241	0.00571166	0.0484324
ZSCAN2	-0.683227	4.06373	18.9817	0.00571656	0.0484324
DLGAP1-AS1	-0.748182	3.82608	21.2587	0.00571782	0.0484324
ZNF581	-0.406075	5.56522	17.9616	0.00573887	0.0485784
ETF1	0.340302	6.9958	11.4941	0.00575724	0.0486693
PMS1	-0.32859	6.24291	18.3385	0.00576923	0.0487383
BMERB1	-0.38923	5.90053	11.476	0.00578497	0.0488389
ENSG00000290854	-0.635298	4.32841	18.1207	0.00579559	0.0488796
SLFN5	-0.300322	6.70392	11.4679	0.00579745	0.0488796
ABHD10	-0.493463	5.08509	18.6119	0.00582281	0.0490609
DDB2	-0.419612	5.53065	15.3751	0.00583174	0.0491037
NUMB	0.503396	7.80458	11.4267	0.0058614	0.0492558
ITGA3	-0.451488	5.98436	11.4269	0.00586098	0.0492558
GNAI3	0.312234	7.02223	11.4153	0.00587913	0.0493264
KLHDC3	-0.364254	6.05605	11.4139	0.0058814	0.0493264
KIF9-AS1	-0.516105	4.92295	17.8386	0.00589419	0.0494011
CDC42SE1	0.329583	6.77884	11.3959	0.00590972	0.0494988
SLC7A1	0.317657	6.62765	16.3012	0.00595257	0.049825
TAGAP-AS1	-0.718925	3.90645	17.6111	0.00597178	0.0499529
IFI6	-0.30523	6.74145	11.3534	0.00597715	0.0499651
