# Supplementary material for: T cell-mediated SIV dissemination into the CNS: a single-cell transcriptomic analysis
Source: Research Square preprint supplement (doi:10.21203/rs.3.rs-6537361/v1), 2025-05-09
Supplement: Supplementary file 2 [file 190a2a6c0d567e2287726391.xlsx]

## Sheet: Cytotoxic
p_val	avg_log2FC	pct.1	pct.2	p_val_adj	cluster	gene
2.36097e-92	1.84065	0.985	0.387	8.31533e-88	Cytotoxic	GZMB
1.43728e-89	1.944	0.912	0.272	5.06211e-85	Cytotoxic	GZMH
3.70609e-85	1.55762	0.956	0.396	1.30529e-80	Cytotoxic	CST7
3.1416e-84	1.67781	0.976	0.402	1.10647e-79	Cytotoxic	NKG7
7.23163e-76	1.51335	0.95	0.358	2.54698e-71	Cytotoxic	ZEB2
1.97767e-74	1.55973	0.894	0.35	6.96535e-70	Cytotoxic	RGS9
2.42836e-62	1.19367	0.976	0.825	8.55269e-58	Cytotoxic	S100A10
7.09191e-62	1.60871	0.832	0.32	2.49777e-57	Cytotoxic	CCL5
1.25733e-61	1.32362	0.912	0.344	4.42831e-57	Cytotoxic	TGFBR3
1.7723e-61	1.39799	0.664	0.164	6.24204e-57	Cytotoxic	GPR141
4.69007e-61	1.3512	0.976	0.567	1.65184e-56	Cytotoxic	S100A4
1.05697e-60	1.20818	0.867	0.337	3.72265e-56	Cytotoxic	RAP1GAP2
1.42482e-60	1.1439	0.717	0.192	5.01823e-56	Cytotoxic	CX3CR1
4.74575e-55	1.13617	0.956	0.726	1.67145e-50	Cytotoxic	HCST
9.03023e-54	1.33855	0.923	0.656	3.18045e-49	Cytotoxic	BABAM2
1.51407e-53	0.95747	0.973	0.918	5.33255e-49	Cytotoxic	SH3BGRL3
2.33206e-50	1.31482	0.844	0.399	8.21351e-46	Cytotoxic	LOC106992647
5.55021e-50	1.16004	0.705	0.24	1.95478e-45	Cytotoxic	CLEC12A
8.71646e-50	1.16334	0.723	0.262	3.06994e-45	Cytotoxic	CLIC5
9.22885e-50	1.06944	0.959	0.653	3.2504e-45	Cytotoxic	SLCO3A1
4.58925e-48	0.89733	0.985	0.958	1.61633e-43	Cytotoxic	CD52
2.03313e-47	0.916563	0.965	0.834	7.16067e-43	Cytotoxic	PPP1R12A
2.89874e-47	1.72181	0.802	0.32	1.02094e-42	Cytotoxic	GNLY
8.06914e-47	1.14946	0.802	0.387	2.84195e-42	Cytotoxic	SYTL2
1.71248e-46	1.22991	0.752	0.291	6.03135e-42	Cytotoxic	PPP2R2B
5.3202e-46	0.857449	0.973	0.879	1.87377e-41	Cytotoxic	EML4
3.33398e-45	1.05803	0.711	0.272	1.17423e-40	Cytotoxic	LOC114675357
6.67283e-45	0.90317	0.903	0.632	2.35017e-40	Cytotoxic	FLNA
9.67394e-45	1.05866	0.938	0.587	3.40716e-40	Cytotoxic	LOC106993196
1.133e-44	0.923546	0.817	0.344	3.99041e-40	Cytotoxic	HOPX
1.42971e-43	0.951099	0.808	0.359	5.03545e-39	Cytotoxic	GZMM
1.48448e-43	1.01694	0.782	0.367	5.22835e-39	Cytotoxic	MYO1F
1.92027e-42	1.1014	0.912	0.615	6.76318e-38	Cytotoxic	ANXA1
2.11584e-42	1.04525	0.684	0.255	7.45201e-38	Cytotoxic	MAMU-DRB1
4.53769e-42	0.512201	1	0.997	1.59818e-37	Cytotoxic	B2M
5.59024e-42	1.02551	0.681	0.263	1.96888e-37	Cytotoxic	NKG2D
5.8962e-42	1.04709	0.897	0.57	2.07664e-37	Cytotoxic	PARP8
3.22739e-41	1.07008	0.681	0.28	1.13669e-36	Cytotoxic	PRF1
5.17799e-41	1.35395	0.56	0.175	1.82369e-36	Cytotoxic	MAMU-DRA
1.36776e-40	0.879207	0.929	0.681	4.81724e-36	Cytotoxic	AHNAK
2.01737e-39	0.836632	0.968	0.946	7.10519e-35	Cytotoxic	CD48
3.10098e-39	0.885985	0.563	0.19	1.09217e-34	Cytotoxic	PRR5L
5.36356e-38	0.819511	0.926	0.598	1.88905e-33	Cytotoxic	DNAJC1
5.38926e-38	0.945435	0.776	0.39	1.8981e-33	Cytotoxic	RAB27A
5.62488e-38	0.555514	0.994	0.986	1.98108e-33	Cytotoxic	PTPRC
8.68749e-37	0.862791	0.965	0.878	3.05974e-32	Cytotoxic	RABGAP1L
1.38136e-36	1.16479	0.528	0.166	4.86516e-32	Cytotoxic	IL7
1.38433e-36	0.972416	0.605	0.235	4.87563e-32	Cytotoxic	TPD52
3.25581e-36	0.876779	0.584	0.204	1.1467e-31	Cytotoxic	LOC114669810
3.64758e-36	0.643382	0.988	0.924	1.28468e-31	Cytotoxic	RAP1B
4.75357e-36	0.871136	0.605	0.232	1.67421e-31	Cytotoxic	GOLIM4
6.32018e-36	0.664404	0.982	0.954	2.22597e-31	Cytotoxic	PITPNC1
1.40433e-35	0.918409	0.858	0.567	4.94603e-31	Cytotoxic	PPP3CA
2.95065e-35	0.878374	0.823	0.477	1.03922e-30	Cytotoxic	ATP2B1
3.12135e-35	0.806113	0.926	0.701	1.09934e-30	Cytotoxic	DIAPH1
6.97633e-35	0.888816	0.9	0.687	2.45706e-30	Cytotoxic	SYTL3
4.46338e-34	0.900436	0.646	0.269	1.572e-29	Cytotoxic	ADAM23
6.25751e-34	1.0219	0.69	0.37	2.20389e-29	Cytotoxic	TTC3
7.64562e-34	0.980252	0.729	0.35	2.69279e-29	Cytotoxic	LOC705095
1.13661e-33	0.803129	0.676	0.28	4.00315e-29	Cytotoxic	JAKMIP2
1.73161e-33	0.806823	0.764	0.42	6.09873e-29	Cytotoxic	SSBP4
2.165e-33	0.903229	0.867	0.653	7.62512e-29	Cytotoxic	SYNE1
3.12458e-33	0.624109	0.979	0.881	1.10048e-28	Cytotoxic	SRGN
1.29318e-32	0.779567	0.888	0.551	4.55458e-28	Cytotoxic	PTPRJ
1.3167e-32	0.954952	0.44	0.116	4.63741e-28	Cytotoxic	MAMU-DQA1
2.66234e-32	0.838982	0.687	0.362	9.37675e-28	Cytotoxic	SLA2
2.67069e-32	0.633507	0.988	0.94	9.40618e-28	Cytotoxic	LOC707383
4.0787e-32	0.818603	0.876	0.599	1.43652e-27	Cytotoxic	ANXA2
9.86603e-32	0.817941	0.832	0.522	3.47482e-27	Cytotoxic	PTPN22
1.17815e-31	0.750249	0.537	0.197	4.14943e-27	Cytotoxic	TBX21
1.2391e-31	0.732444	0.917	0.69	4.36409e-27	Cytotoxic	INPP4A
1.37568e-31	0.870175	0.847	0.582	4.84514e-27	Cytotoxic	KLF3
1.51208e-31	0.853194	0.912	0.783	5.32553e-27	Cytotoxic	S100A11
1.73615e-31	0.663261	0.938	0.867	6.11472e-27	Cytotoxic	MYL6
1.76046e-31	0.802394	0.726	0.379	6.20035e-27	Cytotoxic	LGALS3
2.95502e-31	0.829565	0.841	0.543	1.04076e-26	Cytotoxic	ITGB2
3.64132e-31	0.723323	0.566	0.214	1.28247e-26	Cytotoxic	LOC100430627
1.32337e-30	0.782075	0.501	0.169	4.66091e-26	Cytotoxic	KLRF1
1.8138e-30	0.649948	0.743	0.307	6.3882e-26	Cytotoxic	C11H12orf75
4.83013e-30	0.608504	0.988	0.892	1.70117e-25	Cytotoxic	SH3KBP1
5.05679e-30	0.854112	0.717	0.351	1.781e-25	Cytotoxic	SNTB1
6.11056e-30	0.774592	0.835	0.54	2.15214e-25	Cytotoxic	ITGAL
9.88633e-30	0.921402	0.569	0.245	3.48197e-25	Cytotoxic	DOCK5
1.08191e-29	0.6774	0.351	0.079	3.81048e-25	Cytotoxic	ADGRG1
1.66701e-29	0.763255	0.785	0.529	5.8712e-25	Cytotoxic	ISCA1
7.2887e-29	0.839453	0.788	0.483	2.56708e-24	Cytotoxic	AP1S2
9.95835e-29	0.875931	0.428	0.128	3.50733e-24	Cytotoxic	LOC106999823
2.0247e-28	0.77233	0.428	0.128	7.13098e-24	Cytotoxic	DAPK2
3.93088e-28	0.718939	0.864	0.632	1.38445e-23	Cytotoxic	PLAAT3
1.28901e-27	0.68778	0.965	0.844	4.53988e-23	Cytotoxic	CRIP1
1.45339e-27	0.675968	0.829	0.582	5.11884e-23	Cytotoxic	TMEM50A
1.53883e-27	0.77024	0.652	0.283	5.41976e-23	Cytotoxic	LOC114671905
4.27303e-27	0.853051	0.841	0.632	1.50496e-22	Cytotoxic	CEMIP2
4.89723e-27	0.532204	0.968	0.872	1.72481e-22	Cytotoxic	TGFB1
6.02856e-27	0.753168	0.87	0.627	2.12326e-22	Cytotoxic	LRRC8C
9.4057e-27	0.880934	0.746	0.526	3.31269e-22	Cytotoxic	CD84
1.11369e-26	0.708652	0.625	0.322	3.92242e-22	Cytotoxic	SRM
1.30853e-26	0.609046	0.41	0.133	4.60864e-22	Cytotoxic	PLEK
2.36115e-26	0.69162	0.646	0.339	8.31597e-22	Cytotoxic	RUNX3
2.53999e-26	0.695804	0.617	0.302	8.94586e-22	Cytotoxic	EFHD2
2.84503e-26	0.648775	0.46	0.163	1.00202e-21	Cytotoxic	TSPAN2
3.10499e-26	1.3826	0.363	0.098	1.09358e-21	Cytotoxic	CACNA1B
3.88019e-26	0.839333	0.873	0.607	1.3666e-21	Cytotoxic	PDE3B
4.33108e-26	0.759735	0.454	0.163	1.52541e-21	Cytotoxic	SAMD3
4.54774e-26	0.779821	0.622	0.283	1.60171e-21	Cytotoxic	APOBEC3G
4.94881e-26	0.691592	0.894	0.68	1.74297e-21	Cytotoxic	RORA
6.57876e-26	0.529119	0.463	0.166	2.31704e-21	Cytotoxic	LOC100426632
6.92192e-26	0.733387	0.555	0.246	2.4379e-21	Cytotoxic	HEG1
8.23521e-26	0.641884	0.752	0.392	2.90044e-21	Cytotoxic	CPD
1.6092e-25	0.599192	0.965	0.898	5.6676e-21	Cytotoxic	PRKCH
1.81757e-25	0.693233	0.897	0.738	6.40149e-21	Cytotoxic	CLEC2D
3.37817e-25	0.694943	0.932	0.779	1.18979e-20	Cytotoxic	IQGAP2
3.55873e-25	0.72323	0.864	0.683	1.25339e-20	Cytotoxic	ISG20
4.83148e-25	0.711035	0.909	0.703	1.70165e-20	Cytotoxic	ITGA4
9.36385e-25	0.635953	0.923	0.873	3.29795e-20	Cytotoxic	MBP
1.38722e-24	0.768841	0.475	0.183	4.88579e-20	Cytotoxic	CLECL1
1.48918e-24	0.637432	0.971	0.878	5.24488e-20	Cytotoxic	KLF12
1.96648e-24	0.66185	0.85	0.652	6.92593e-20	Cytotoxic	RNF149
2.11168e-24	0.670981	0.336	0.09	7.43735e-20	Cytotoxic	NHSL2
6.02708e-24	0.54912	0.891	0.605	2.12274e-19	Cytotoxic	STAT4
1.41279e-23	0.640995	0.758	0.469	4.97585e-19	Cytotoxic	TNFRSF1B
1.79392e-23	0.705043	0.622	0.345	6.3182e-19	Cytotoxic	ZBTB38
2.64854e-23	0.692997	0.614	0.361	9.32814e-19	Cytotoxic	MXD4
3.69848e-23	0.644704	0.378	0.119	1.30261e-18	Cytotoxic	FRY
4.95741e-23	0.973975	0.581	0.289	1.746e-18	Cytotoxic	CD74
1.03169e-22	0.68721	0.897	0.692	3.63363e-18	Cytotoxic	PIK3R5
1.47321e-22	0.714881	0.487	0.223	5.18866e-18	Cytotoxic	USP28
2.03436e-22	0.603304	0.664	0.353	7.16502e-18	Cytotoxic	KAT2B
3.15043e-22	0.703033	0.687	0.457	1.10958e-17	Cytotoxic	MTPN
5.20236e-22	0.64077	0.33	0.096	1.83227e-17	Cytotoxic	FAM49A
5.26512e-22	0.58151	0.867	0.647	1.85437e-17	Cytotoxic	LY6E-1
7.42255e-22	0.485153	0.976	0.937	2.61422e-17	Cytotoxic	FNBP1
8.61442e-22	0.575777	0.687	0.325	3.034e-17	Cytotoxic	LOC106993126
9.49621e-22	0.498909	0.979	0.924	3.34457e-17	Cytotoxic	MAMU-AG
9.80044e-22	0.633915	0.693	0.412	3.45172e-17	Cytotoxic	C6H5orf56
1.04372e-21	0.645687	0.835	0.582	3.67597e-17	Cytotoxic	ATP2B4
1.05572e-21	0.587376	0.95	0.848	3.71823e-17	Cytotoxic	IFI27L2
1.08909e-21	0.750153	0.378	0.139	3.83576e-17	Cytotoxic	CMA1
1.25391e-21	0.565856	0.979	0.943	4.41627e-17	Cytotoxic	ANKRD44
2.00996e-21	0.638219	0.44	0.18	7.07909e-17	Cytotoxic	IL18
2.50455e-21	0.62974	0.416	0.161	8.82102e-17	Cytotoxic	GAB3
4.06936e-21	0.583257	0.319	0.091	1.43323e-16	Cytotoxic	SLCO4C1
4.22626e-21	0.570348	0.917	0.759	1.48849e-16	Cytotoxic	PICALM
4.55803e-21	0.5137	0.316	0.093	1.60534e-16	Cytotoxic	LOC107000655
4.6296e-21	0.642949	0.661	0.389	1.63055e-16	Cytotoxic	CERKL
5.19802e-21	0.593485	0.85	0.636	1.83074e-16	Cytotoxic	GLIPR2
7.57168e-21	0.821371	0.755	0.497	2.66675e-16	Cytotoxic	RAPGEF2
1.05733e-20	0.527295	0.935	0.854	3.72392e-16	Cytotoxic	CD3G
1.24928e-20	0.541413	0.853	0.594	4.39995e-16	Cytotoxic	ATXN1
1.48204e-20	0.512961	0.876	0.746	5.21974e-16	Cytotoxic	MSN
1.80738e-20	0.784566	0.64	0.368	6.36561e-16	Cytotoxic	TMTC2
5.05633e-20	0.704121	0.732	0.54	1.78084e-15	Cytotoxic	GLIPR1
5.05845e-20	0.618834	0.578	0.31	1.78159e-15	Cytotoxic	MTMR12
5.35663e-20	0.586348	0.729	0.43	1.8866e-15	Cytotoxic	LOC706608
6.31276e-20	0.584288	0.935	0.845	2.22335e-15	Cytotoxic	CBLB
7.96753e-20	0.600338	0.531	0.269	2.80616e-15	Cytotoxic	PRDM1
9.17497e-20	0.595573	0.428	0.187	3.23143e-15	Cytotoxic	LOC107000617
1.59261e-19	0.642562	0.699	0.466	5.60917e-15	Cytotoxic	AGPS
1.64036e-19	0.512476	0.342	0.116	5.77733e-15	Cytotoxic	SYT11
1.8463e-19	0.48187	0.956	0.901	6.50266e-15	Cytotoxic	ARPC2
2.56651e-19	0.659813	0.519	0.274	9.03926e-15	Cytotoxic	SLAMF6
4.28475e-19	0.712208	0.327	0.104	1.50909e-14	Cytotoxic	KLRD1
9.08599e-19	0.453326	0.944	0.893	3.20008e-14	Cytotoxic	ARPC1B
1.06778e-18	0.582941	0.796	0.573	3.76074e-14	Cytotoxic	CLEC2B
1.17931e-18	0.654419	0.855	0.588	4.15351e-14	Cytotoxic	LOC701976
1.48805e-18	0.589836	0.708	0.485	5.2409e-14	Cytotoxic	C15H9orf16
1.87624e-18	0.607773	0.776	0.539	6.60813e-14	Cytotoxic	STK39
1.96771e-18	0.560515	0.339	0.118	6.93027e-14	Cytotoxic	MAMU-DRB5
2.18288e-18	0.519294	0.363	0.141	7.6881e-14	Cytotoxic	RHOC
2.29442e-18	0.567844	0.956	0.879	8.08093e-14	Cytotoxic	LOC114669767
3.29588e-18	0.497233	0.752	0.5	1.16081e-13	Cytotoxic	GNA13
4.52429e-18	0.564783	0.655	0.384	1.59345e-13	Cytotoxic	DHRS7
4.92304e-18	0.524416	0.947	0.862	1.7339e-13	Cytotoxic	EMP3
6.8613e-18	0.611355	0.369	0.138	2.41655e-13	Cytotoxic	KLRG1
6.91474e-18	0.690814	0.504	0.269	2.43537e-13	Cytotoxic	AGPAT4
1.07754e-17	0.482867	0.788	0.536	3.79509e-13	Cytotoxic	ARAP2
1.496e-17	0.529588	0.861	0.755	5.26892e-13	Cytotoxic	MYL12B
1.68639e-17	0.609192	0.451	0.226	5.93946e-13	Cytotoxic	SERPINA1
1.88489e-17	0.520607	0.832	0.678	6.63859e-13	Cytotoxic	RAPGEF1
2.1349e-17	0.655925	0.681	0.461	7.51911e-13	Cytotoxic	ATXN7L1
2.33994e-17	0.511528	0.313	0.107	8.24128e-13	Cytotoxic	SLAMF7
2.536e-17	0.469284	0.971	0.916	8.93179e-13	Cytotoxic	AKAP13
2.58309e-17	0.612522	0.678	0.464	9.09766e-13	Cytotoxic	FAR1
2.61441e-17	0.577028	0.622	0.392	9.20797e-13	Cytotoxic	TESC
2.86831e-17	0.526374	0.72	0.494	1.01022e-12	Cytotoxic	SRI
3.86204e-17	0.591769	0.501	0.266	1.36021e-12	Cytotoxic	STX4
5.55268e-17	0.289499	0.935	0.762	1.95565e-12	Cytotoxic	CD44
7.59935e-17	0.58023	0.463	0.223	2.67649e-12	Cytotoxic	EMB
1.00282e-16	0.500848	0.87	0.666	3.53195e-12	Cytotoxic	STK10
1.08975e-16	0.531166	0.372	0.152	3.83811e-12	Cytotoxic	MAMU-DPB
1.22389e-16	0.628747	0.737	0.52	4.31054e-12	Cytotoxic	BST2
1.50897e-16	0.535241	0.572	0.356	5.3146e-12	Cytotoxic	CTSA
1.51301e-16	0.536523	0.59	0.341	5.32883e-12	Cytotoxic	SEPTIN11
1.70231e-16	0.499456	0.555	0.322	5.99553e-12	Cytotoxic	IDS
2.02848e-16	0.69034	0.767	0.56	7.14431e-12	Cytotoxic	MAPRE2
2.69177e-16	0.508139	0.289	0.093	9.4804e-12	Cytotoxic	SLC11A1
3.01256e-16	0.563353	0.811	0.588	1.06102e-11	Cytotoxic	UCP2
3.31054e-16	0.553255	0.369	0.161	1.16597e-11	Cytotoxic	MAMU-DQB1
3.36419e-16	0.550434	0.537	0.299	1.18487e-11	Cytotoxic	SPN
4.54332e-16	0.811409	0.304	0.115	1.60016e-11	Cytotoxic	TNFRSF18
4.91627e-16	0.578538	0.652	0.457	1.73151e-11	Cytotoxic	SLC25A4
8.8366e-16	0.577475	0.59	0.358	3.11225e-11	Cytotoxic	APOBEC3H
1.20553e-15	0.47651	0.903	0.754	4.24588e-11	Cytotoxic	NR3C1
1.69082e-15	0.460821	0.929	0.847	5.95506e-11	Cytotoxic	LOC114677644
2.17251e-15	0.441348	0.522	0.282	7.65158e-11	Cytotoxic	APOBEC3C
3.73862e-15	0.524084	0.277	0.096	1.31674e-10	Cytotoxic	GFI1
5.06105e-15	0.404759	0.962	0.92	1.7825e-10	Cytotoxic	OAZ1
6.64127e-15	0.593281	0.605	0.402	2.33905e-10	Cytotoxic	MADD
6.89846e-15	0.513145	0.383	0.172	2.42964e-10	Cytotoxic	CSF1
7.96443e-15	0.692948	0.404	0.195	2.80507e-10	Cytotoxic	HIP1
8.01372e-15	0.484992	0.755	0.594	2.82243e-10	Cytotoxic	SPATA13
8.20656e-15	0.493437	0.752	0.579	2.89035e-10	Cytotoxic	OSTF1
8.7544e-15	0.527441	0.802	0.644	3.0833e-10	Cytotoxic	AKNA
1.20107e-14	0.509559	0.413	0.197	4.23016e-10	Cytotoxic	LOC701439
1.51693e-14	0.586449	0.304	0.118	5.34262e-10	Cytotoxic	FGFBP2
2.7267e-14	0.448527	0.416	0.198	9.60345e-10	Cytotoxic	MCOLN2
3.21359e-14	0.475447	0.67	0.467	1.13183e-09	Cytotoxic	MYO1G
3.38875e-14	0.333665	0.826	0.601	1.19352e-09	Cytotoxic	ID2
3.56134e-14	0.40406	0.274	0.098	1.2543e-09	Cytotoxic	PLCG2
5.8668e-14	0.508918	0.794	0.635	2.06629e-09	Cytotoxic	EPS15
6.41587e-14	0.347002	0.988	0.957	2.25967e-09	Cytotoxic	CALM1
6.57757e-14	0.508451	0.496	0.28	2.31662e-09	Cytotoxic	CCDC167
6.97609e-14	0.539354	0.67	0.467	2.45698e-09	Cytotoxic	FOXN2
7.2609e-14	0.41817	0.914	0.82	2.55729e-09	Cytotoxic	RAC2
1.12616e-13	0.439716	0.726	0.54	3.96635e-09	Cytotoxic	NLRC5
1.4889e-13	0.46042	0.578	0.372	5.24389e-09	Cytotoxic	CCDC12
1.63227e-13	0.46397	0.755	0.605	5.74887e-09	Cytotoxic	TLN1
1.68554e-13	0.540476	0.64	0.454	5.93647e-09	Cytotoxic	CD226
1.68799e-13	0.459134	0.434	0.207	5.94509e-09	Cytotoxic	GALNT3
1.92757e-13	0.585549	0.64	0.469	6.7889e-09	Cytotoxic	DYNLL1
2.0075e-13	0.593726	0.251	0.09	7.07043e-09	Cytotoxic	GK5
2.32861e-13	0.459669	0.339	0.158	8.20138e-09	Cytotoxic	MATK
2.33959e-13	0.545208	0.569	0.37	8.24004e-09	Cytotoxic	TMEM154
3.02822e-13	0.489745	0.469	0.268	1.06654e-08	Cytotoxic	CAPN2
3.95779e-13	0.443293	0.885	0.769	1.39393e-08	Cytotoxic	BIN2
4.56215e-13	0.264623	0.997	0.983	1.60679e-08	Cytotoxic	TMSB4X
4.78851e-13	0.482233	0.363	0.176	1.68651e-08	Cytotoxic	LOC106995333
5.77758e-13	0.366998	0.944	0.933	2.03486e-08	Cytotoxic	SERF2
8.77104e-13	0.535628	0.673	0.539	3.08916e-08	Cytotoxic	CLINT1
9.11046e-13	0.461665	0.587	0.347	3.2087e-08	Cytotoxic	GNAQ
1.15286e-12	0.517909	0.678	0.503	4.06039e-08	Cytotoxic	ANXA6
1.2465e-12	0.446291	0.578	0.372	4.39018e-08	Cytotoxic	TMEM181
1.64161e-12	0.445556	0.378	0.2	5.78174e-08	Cytotoxic	LOC710961
1.73316e-12	0.588331	0.354	0.175	6.10419e-08	Cytotoxic	JAKMIP1
2.08723e-12	0.505544	0.407	0.231	7.35124e-08	Cytotoxic	GDE1
2.12533e-12	0.472948	0.437	0.246	7.48542e-08	Cytotoxic	PRR5
2.189e-12	0.615001	0.404	0.223	7.70967e-08	Cytotoxic	SH3BP5
2.20205e-12	0.42639	0.678	0.517	7.75561e-08	Cytotoxic	AP2M1
2.22307e-12	0.376048	0.882	0.735	7.82964e-08	Cytotoxic	PSMB9
2.47566e-12	0.406099	0.631	0.44	8.71927e-08	Cytotoxic	LAMP1
2.58148e-12	0.401194	0.935	0.872	9.09199e-08	Cytotoxic	VPS13B
2.59886e-12	0.469562	0.437	0.249	9.15319e-08	Cytotoxic	PLEKHG3
2.71943e-12	0.462525	0.87	0.771	9.57782e-08	Cytotoxic	SORL1
2.98606e-12	0.319561	0.971	0.94	1.05169e-07	Cytotoxic	CD3D
2.99783e-12	0.491691	0.74	0.576	1.05583e-07	Cytotoxic	TANK
3.33566e-12	0.400661	0.912	0.768	1.17482e-07	Cytotoxic	CAPZB
4.0667e-12	0.630659	0.785	0.652	1.43229e-07	Cytotoxic	ITM2A
4.20713e-12	0.406531	0.752	0.624	1.48175e-07	Cytotoxic	MOB2
4.91134e-12	0.395545	0.817	0.639	1.72978e-07	Cytotoxic	PRKCA
5.17388e-12	0.519317	0.434	0.241	1.82224e-07	Cytotoxic	ADCY9
5.27695e-12	0.53211	0.395	0.218	1.85854e-07	Cytotoxic	RNF144A
6.0423e-12	0.529206	0.687	0.503	2.1281e-07	Cytotoxic	LOC106992273
6.10875e-12	0.403051	0.891	0.836	2.1515e-07	Cytotoxic	LCK
6.83296e-12	0.557643	0.794	0.632	2.40657e-07	Cytotoxic	ARID5B
7.49857e-12	0.420942	0.319	0.152	2.641e-07	Cytotoxic	PAFAH2
1.08353e-11	0.526505	0.755	0.642	3.8162e-07	Cytotoxic	TC2N
1.13583e-11	0.33819	0.965	0.949	4.00039e-07	Cytotoxic	SKAP1
1.19902e-11	0.459145	0.386	0.211	4.22296e-07	Cytotoxic	PXN
2.20992e-11	0.45187	0.584	0.415	7.78333e-07	Cytotoxic	CDK2AP2
2.73789e-11	0.409648	0.82	0.664	9.64286e-07	Cytotoxic	LRRFIP1
2.81911e-11	0.568176	0.673	0.483	9.92892e-07	Cytotoxic	GLCCI1
3.30328e-11	0.504933	0.437	0.265	1.16342e-06	Cytotoxic	ADIPOR2
3.64377e-11	0.426635	0.676	0.503	1.28334e-06	Cytotoxic	IL10RB
3.94545e-11	0.487464	0.46	0.28	1.38959e-06	Cytotoxic	FAS
4.41124e-11	0.457967	0.817	0.686	1.55364e-06	Cytotoxic	RASSF1
5.1692e-11	0.359959	0.879	0.774	1.82059e-06	Cytotoxic	ELOB
5.6382e-11	0.413711	0.785	0.65	1.98577e-06	Cytotoxic	NFATC3
5.98712e-11	0.360152	0.735	0.56	2.10867e-06	Cytotoxic	RABAC1
6.13158e-11	0.418307	0.802	0.633	2.15954e-06	Cytotoxic	TOX
6.67014e-11	0.41679	0.484	0.294	2.34922e-06	Cytotoxic	SLC35D2
9.17218e-11	0.409556	0.457	0.271	3.23044e-06	Cytotoxic	ABHD17B
1.08421e-10	0.400851	0.51	0.325	3.81859e-06	Cytotoxic	PYCARD
1.32184e-10	0.415733	0.971	0.937	4.65552e-06	Cytotoxic	LOC705671
1.48823e-10	0.322358	0.947	0.904	5.24153e-06	Cytotoxic	PFN1
1.56627e-10	0.487536	0.696	0.539	5.51639e-06	Cytotoxic	DENND1B
1.74227e-10	0.449022	0.678	0.519	6.13629e-06	Cytotoxic	ARHGAP30
1.74905e-10	0.324874	0.87	0.689	6.16015e-06	Cytotoxic	LCP1
1.87347e-10	0.380613	0.298	0.142	6.59838e-06	Cytotoxic	HACD4
1.89824e-10	0.297119	0.475	0.288	6.68561e-06	Cytotoxic	SERPINB1
2.09306e-10	0.481246	0.504	0.348	7.37174e-06	Cytotoxic	GSTK1
2.27636e-10	0.382357	0.413	0.245	8.01735e-06	Cytotoxic	RASGEF1A
2.39626e-10	0.364278	0.858	0.763	8.43963e-06	Cytotoxic	ACTR3
2.48315e-10	0.480128	0.525	0.353	8.74566e-06	Cytotoxic	CISD3
2.48695e-10	0.647857	0.608	0.443	8.75903e-06	Cytotoxic	RRAS2
2.80636e-10	0.346367	0.295	0.133	9.88399e-06	Cytotoxic	CCL4L1
3.46182e-10	0.254715	0.968	0.949	1.21925e-05	Cytotoxic	UBC
3.56124e-10	0.450801	0.496	0.337	1.25427e-05	Cytotoxic	GLRX
3.98204e-10	0.394449	0.313	0.161	1.40247e-05	Cytotoxic	LLGL2
4.58095e-10	0.345161	0.9	0.782	1.61341e-05	Cytotoxic	IFI16
4.77896e-10	0.377294	0.838	0.726	1.68315e-05	Cytotoxic	PSMB8
4.92392e-10	0.343587	0.398	0.223	1.73421e-05	Cytotoxic	SRGAP2
5.00898e-10	0.443593	0.746	0.613	1.76416e-05	Cytotoxic	CAP1
5.02342e-10	0.436319	0.681	0.546	1.76925e-05	Cytotoxic	HCLS1
5.67995e-10	0.440869	0.652	0.523	2.00048e-05	Cytotoxic	COMT
5.92689e-10	0.532473	0.552	0.378	2.08745e-05	Cytotoxic	CRY1
6.83871e-10	0.345098	0.569	0.356	2.40859e-05	Cytotoxic	BHLHE40
6.856e-10	0.417114	0.342	0.186	2.41468e-05	Cytotoxic	ZBP1
6.99258e-10	0.438606	0.383	0.228	2.46279e-05	Cytotoxic	ZYX
7.32514e-10	0.481294	0.543	0.395	2.57991e-05	Cytotoxic	DNAJB14
9.29342e-10	0.408243	0.929	0.876	3.27314e-05	Cytotoxic	CORO1A
9.86552e-10	0.509669	0.935	0.884	3.47464e-05	Cytotoxic	LOC703029
1.00076e-09	0.350306	0.903	0.847	3.52468e-05	Cytotoxic	ARPC3
1.18709e-09	0.395961	0.407	0.252	4.18092e-05	Cytotoxic	SH2D2A
1.26609e-09	0.492829	0.835	0.72	4.45916e-05	Cytotoxic	HERC1
1.26617e-09	0.356527	0.265	0.124	4.45945e-05	Cytotoxic	ZFYVE28
1.30595e-09	0.463815	0.711	0.559	4.59955e-05	Cytotoxic	ST8SIA4
1.3679e-09	0.453025	0.637	0.474	4.81776e-05	Cytotoxic	GRK5
1.38018e-09	0.458278	0.472	0.322	4.861e-05	Cytotoxic	RPS6KA1
1.55162e-09	0.41937	0.814	0.678	5.46482e-05	Cytotoxic	TAOK3
1.73185e-09	0.436522	0.835	0.828	6.09957e-05	Cytotoxic	PTPRCAP
1.97158e-09	0.531839	0.546	0.402	6.9439e-05	Cytotoxic	OXSR1
2.07056e-09	0.50155	0.49	0.322	7.2925e-05	Cytotoxic	FNDC3B
2.424e-09	0.344986	0.773	0.675	8.53734e-05	Cytotoxic	PRR13
2.49744e-09	0.402629	0.357	0.206	8.796e-05	Cytotoxic	DUSP18
3.45245e-09	0.314536	0.735	0.582	0.000121595	Cytotoxic	SELENOT
3.70805e-09	0.562119	0.938	0.876	0.000130598	Cytotoxic	LOC114669738
3.84429e-09	0.479084	0.673	0.553	0.000135396	Cytotoxic	TSPO
3.87073e-09	0.372066	0.558	0.409	0.000136327	Cytotoxic	ABHD17A
3.95917e-09	0.400616	0.431	0.276	0.000139442	Cytotoxic	BLVRB
3.97724e-09	0.477284	0.649	0.514	0.000140078	Cytotoxic	ARHGAP25
4.20169e-09	0.427856	0.794	0.656	0.000147983	Cytotoxic	FBXW7
4.27268e-09	0.46059	0.776	0.681	0.000150484	Cytotoxic	ARL15
4.84252e-09	0.396381	0.796	0.697	0.000170553	Cytotoxic	BLOC1S1
5.15282e-09	0.41519	0.729	0.615	0.000181482	Cytotoxic	IL2RG
5.23943e-09	0.339662	0.437	0.274	0.000184533	Cytotoxic	CLN3
5.3542e-09	0.398479	0.802	0.67	0.000188575	Cytotoxic	TRPS1
5.81788e-09	0.326956	0.773	0.67	0.000204906	Cytotoxic	TMEM59
5.96418e-09	0.380553	0.271	0.13	0.000210059	Cytotoxic	SETBP1
6.78945e-09	0.448483	0.912	0.839	0.000239125	Cytotoxic	FKBP5
9.31718e-09	0.350992	0.805	0.68	0.000328151	Cytotoxic	SEMA4D
9.90234e-09	0.351493	0.584	0.401	0.00034876	Cytotoxic	GTDC1
1.06381e-08	0.396782	0.667	0.54	0.000374675	Cytotoxic	MARK3
1.08795e-08	0.408521	0.372	0.226	0.000383176	Cytotoxic	TPST2
1.28284e-08	0.409903	0.381	0.234	0.000451817	Cytotoxic	PARP15
1.38406e-08	0.299184	0.395	0.246	0.000487465	Cytotoxic	TBCB
1.39978e-08	0.406638	0.54	0.398	0.000493002	Cytotoxic	CHST12
1.49685e-08	0.342547	0.324	0.186	0.000527192	Cytotoxic	TNFSF12
1.49995e-08	0.380478	0.714	0.57	0.000528282	Cytotoxic	DBI
1.52406e-08	0.437163	0.339	0.2	0.000536775	Cytotoxic	PTDSS1
1.65219e-08	0.473213	0.265	0.133	0.0005819	Cytotoxic	FAM13A
1.69697e-08	0.37135	0.628	0.52	0.000597671	Cytotoxic	EFCC1
1.71397e-08	0.444049	0.487	0.331	0.000603661	Cytotoxic	MAF
1.71943e-08	0.398487	0.44	0.285	0.000605583	Cytotoxic	SASH3
1.73496e-08	0.350488	0.749	0.633	0.000611052	Cytotoxic	CD6
1.75754e-08	0.338088	0.398	0.246	0.000619005	Cytotoxic	MARCH2
1.84302e-08	0.381544	0.286	0.144	0.000649113	Cytotoxic	ST8SIA1
1.8737e-08	0.40924	0.558	0.41	0.000659919	Cytotoxic	LPIN1
2.10069e-08	0.341694	0.673	0.536	0.000739862	Cytotoxic	ARPC4
2.36217e-08	0.33005	0.817	0.7	0.000831958	Cytotoxic	LSP1
2.37991e-08	0.397907	0.304	0.164	0.000838206	Cytotoxic	CEP78
2.48687e-08	0.376675	0.59	0.449	0.000875875	Cytotoxic	GNAI3
2.62089e-08	0.472351	0.558	0.426	0.000923079	Cytotoxic	CEBPB
2.67546e-08	0.487805	0.463	0.308	0.000942298	Cytotoxic	HLCS
2.76329e-08	0.303868	0.888	0.854	0.000973232	Cytotoxic	ATP5MPL
2.94861e-08	0.286653	0.832	0.703	0.0010385	Cytotoxic	COX8A
3.01095e-08	0.325147	0.785	0.652	0.00106046	Cytotoxic	INPP5D
3.02145e-08	0.359927	0.587	0.454	0.00106416	Cytotoxic	AIM2
3.18944e-08	0.397191	0.442	0.303	0.00112332	Cytotoxic	FAM53B
3.34578e-08	0.460919	0.684	0.559	0.00117838	Cytotoxic	KAT6B
3.62248e-08	0.551185	0.251	0.115	0.00127584	Cytotoxic	KLRB1
3.94142e-08	0.411276	0.366	0.235	0.00138817	Cytotoxic	POM121C
4.17191e-08	0.405972	0.684	0.557	0.00146935	Cytotoxic	MAPK1
4.37308e-08	0.321394	0.298	0.166	0.0015402	Cytotoxic	PNPLA6
4.40621e-08	0.294531	0.271	0.136	0.00155187	Cytotoxic	SKAP2
4.71202e-08	0.401244	0.389	0.255	0.00165957	Cytotoxic	RAB37
4.82799e-08	0.380069	0.251	0.127	0.00170042	Cytotoxic	OSBPL7
4.90568e-08	0.485021	0.581	0.469	0.00172778	Cytotoxic	CNST
5.0123e-08	0.341595	0.389	0.254	0.00176533	Cytotoxic	UCKL1
5.11156e-08	0.273819	0.605	0.46	0.00180029	Cytotoxic	ETFB
5.16997e-08	0.308603	0.534	0.367	0.00182086	Cytotoxic	ACTN4
5.57426e-08	0.385677	0.398	0.26	0.00196326	Cytotoxic	SIRT2
5.77747e-08	0.420235	0.351	0.221	0.00203483	Cytotoxic	CASP10
5.89738e-08	0.37242	0.64	0.506	0.00207706	Cytotoxic	NCK1
5.93199e-08	0.337158	0.395	0.257	0.00208925	Cytotoxic	TSPAN32
6.28733e-08	0.332557	0.593	0.427	0.0022144	Cytotoxic	SGMS1
6.49013e-08	0.416529	0.628	0.505	0.00228583	Cytotoxic	ORAI1
7.03363e-08	0.315616	0.283	0.147	0.00247724	Cytotoxic	ALOX5AP
7.34898e-08	0.335031	0.858	0.779	0.00258831	Cytotoxic	TPM3
7.5848e-08	0.408711	0.507	0.376	0.00267137	Cytotoxic	TSEN54
8.55708e-08	0.372147	0.658	0.537	0.0030138	Cytotoxic	XPO6
9.15536e-08	0.434563	0.563	0.424	0.00322452	Cytotoxic	PDZD8
9.77963e-08	0.273304	0.251	0.124	0.00344439	Cytotoxic	ENPP4
1.04656e-07	0.361863	0.664	0.512	0.00368597	Cytotoxic	FKBP1A
1.09571e-07	0.342665	0.593	0.469	0.00385908	Cytotoxic	REEP5
1.10751e-07	0.4167	0.295	0.159	0.00390066	Cytotoxic	ABCA1
1.12833e-07	0.333195	0.448	0.31	0.00397398	Cytotoxic	TBPL1
1.20697e-07	0.359688	0.634	0.514	0.00425096	Cytotoxic	TLR9
1.29221e-07	0.382593	0.791	0.68	0.00455116	Cytotoxic	NCOA2
1.32809e-07	0.266449	0.611	0.463	0.00467754	Cytotoxic	DSTN
1.3459e-07	0.314257	0.398	0.257	0.00474026	Cytotoxic	GMIP
1.46658e-07	0.407287	0.398	0.268	0.00516531	Cytotoxic	CD58
1.51619e-07	0.333263	0.28	0.144	0.00534003	Cytotoxic	WDR63
1.5881e-07	0.384607	0.578	0.435	0.0055933	Cytotoxic	LOC695267
1.7673e-07	0.33167	0.298	0.17	0.00622444	Cytotoxic	RAB24
1.83867e-07	0.419379	0.714	0.613	0.00647578	Cytotoxic	SLC4A7
2.04866e-07	0.302968	0.26	0.135	0.00721537	Cytotoxic	LOC114680366
2.06811e-07	0.269591	0.596	0.471	0.00728388	Cytotoxic	IKZF3
2.11427e-07	0.294575	0.743	0.602	0.00744646	Cytotoxic	NFAT5
2.27782e-07	0.331056	0.605	0.433	0.00802249	Cytotoxic	IDH2
2.46764e-07	0.3633	0.501	0.375	0.00869102	Cytotoxic	PPP1R18
2.86955e-07	0.335754	0.838	0.755	0.0101066	Cytotoxic	SRPK2
2.96221e-07	0.371241	0.617	0.509	0.0104329	Cytotoxic	CTSS
3.08068e-07	0.338194	0.342	0.212	0.0108502	Cytotoxic	MAP4K1
3.10976e-07	0.352107	0.431	0.296	0.0109526	Cytotoxic	OTULINL
3.15545e-07	0.338058	0.841	0.746	0.0111135	Cytotoxic	ZNF292
3.53938e-07	0.322248	0.841	0.709	0.0124657	Cytotoxic	TAGLN2
3.75972e-07	0.431365	0.466	0.336	0.0132417	Cytotoxic	VRK2
3.93265e-07	0.318906	0.475	0.334	0.0138508	Cytotoxic	ARNTL
4.39337e-07	0.378476	0.634	0.506	0.0154735	Cytotoxic	ST3GAL1
4.70369e-07	0.31113	0.835	0.737	0.0165664	Cytotoxic	DOCK2
4.72805e-07	0.395069	0.537	0.402	0.0166522	Cytotoxic	BMP2K
4.89818e-07	0.375302	0.507	0.404	0.0172514	Cytotoxic	BLOC1S2
5.32948e-07	0.275646	0.923	0.833	0.0187704	Cytotoxic	SCML4
5.87342e-07	0.357206	0.832	0.748	0.0206862	Cytotoxic	SP100
6.34835e-07	0.272244	0.962	0.924	0.0223589	Cytotoxic	ETS1
6.46981e-07	0.252046	0.392	0.252	0.0227867	Cytotoxic	FRMD4B
6.63896e-07	0.319932	0.581	0.449	0.0233824	Cytotoxic	CCND2
7.23437e-07	0.380005	0.487	0.365	0.0254794	Cytotoxic	ARRB2
7.63455e-07	0.291239	0.652	0.528	0.0268889	Cytotoxic	RAP1GDS1
7.73304e-07	0.351678	0.501	0.381	0.0272358	Cytotoxic	RASAL3
7.93789e-07	0.288704	0.369	0.237	0.0279572	Cytotoxic	OSTM1
9.62621e-07	0.41143	0.363	0.248	0.0339035	Cytotoxic	FKBP15
1.02366e-06	0.251721	0.923	0.913	0.0360533	Cytotoxic	CFL1
1.10039e-06	0.534636	0.366	0.24	0.0387557	Cytotoxic	DDX60
1.17234e-06	0.333148	0.634	0.492	0.0412897	Cytotoxic	TRPC4AP
1.35475e-06	0.263188	0.864	0.783	0.0477141	Cytotoxic	MYH9
1.4188e-06	0.298505	0.307	0.175	0.04997	Cytotoxic	GADD45A
1.4558e-06	0.282648	0.894	0.834	0.0512732	Cytotoxic	SEPTIN7
1.46239e-06	0.298672	0.263	0.149	0.0515052	Cytotoxic	PCSK7
1.54173e-06	0.296751	0.808	0.735	0.0542996	Cytotoxic	SSR2
1.57066e-06	0.339905	0.257	0.147	0.0553186	Cytotoxic	LAX1
1.67621e-06	0.404084	0.593	0.508	0.059036	Cytotoxic	KIAA0040
1.80007e-06	0.32194	0.844	0.788	0.0633986	Cytotoxic	LOC696748
1.8513e-06	0.383407	0.481	0.35	0.0652029	Cytotoxic	TNFSF4
1.86858e-06	0.516678	0.493	0.392	0.0658113	Cytotoxic	VPS8
2.32411e-06	0.290534	0.254	0.147	0.0818553	Cytotoxic	TMEM106A
2.37577e-06	0.335481	0.608	0.517	0.0836744	Cytotoxic	CD4
2.85431e-06	0.463668	0.543	0.44	0.100529	Cytotoxic	RB1
3.28411e-06	0.28636	0.416	0.293	0.115666	Cytotoxic	ILRUN
3.29156e-06	0.400193	0.263	0.153	0.115929	Cytotoxic	STX2
3.37628e-06	0.257765	0.487	0.336	0.118912	Cytotoxic	EED
3.41135e-06	0.288682	0.251	0.141	0.120148	Cytotoxic	HBA1
3.43752e-06	0.278452	0.345	0.226	0.12107	Cytotoxic	GTF3C1
3.71409e-06	0.342372	0.605	0.478	0.13081	Cytotoxic	IRF1
3.87183e-06	0.279271	0.345	0.221	0.136366	Cytotoxic	C3H21orf91
4.00373e-06	0.445217	0.484	0.37	0.141011	Cytotoxic	LRMP
4.22621e-06	0.27351	0.684	0.548	0.148847	Cytotoxic	NEK7
4.83544e-06	0.263839	0.687	0.57	0.170304	Cytotoxic	CD2
4.94564e-06	0.285076	0.829	0.766	0.174186	Cytotoxic	ABRACL
5.1124e-06	0.339458	0.501	0.375	0.180059	Cytotoxic	SNTB2
5.53419e-06	0.373417	0.398	0.283	0.194914	Cytotoxic	LOC106999632
5.79829e-06	0.318366	0.472	0.364	0.204216	Cytotoxic	APC
5.89642e-06	0.307652	0.504	0.389	0.207672	Cytotoxic	C20H16orf54
6.96308e-06	0.307623	0.82	0.759	0.24524	Cytotoxic	TGFBR2
7.16144e-06	0.305939	0.844	0.74	0.252226	Cytotoxic	PPP3CC
7.42353e-06	0.306043	0.785	0.723	0.261457	Cytotoxic	WAC
7.85268e-06	0.373281	0.496	0.393	0.276571	Cytotoxic	C10H20orf24
7.85298e-06	0.312161	0.746	0.659	0.276582	Cytotoxic	BRD7
7.99479e-06	0.283616	0.381	0.274	0.281577	Cytotoxic	ADCY7
9.19001e-06	0.342428	0.522	0.413	0.323672	Cytotoxic	MAP4
9.72978e-06	0.308395	0.301	0.19	0.342683	Cytotoxic	ATP6V0D1
9.81461e-06	0.343923	0.434	0.319	0.345671	Cytotoxic	MAP4K5
1.02991e-05	0.411964	0.676	0.591	0.362736	Cytotoxic	LPP
1.06473e-05	0.371697	0.271	0.166	0.375	Cytotoxic	PDE4A
1.10347e-05	0.352603	0.354	0.241	0.388641	Cytotoxic	UBE2Q2
1.12518e-05	0.312372	0.348	0.241	0.39629	Cytotoxic	SLC25A42
1.1475e-05	0.273297	0.64	0.542	0.404151	Cytotoxic	VPS13C
1.15046e-05	0.263097	0.484	0.373	0.405194	Cytotoxic	FLII
1.15194e-05	0.562621	0.558	0.46	0.405714	Cytotoxic	TFDP2
1.16603e-05	0.268226	0.469	0.341	0.410674	Cytotoxic	MSH3
1.27298e-05	0.277485	0.658	0.57	0.448343	Cytotoxic	NDUFA13
1.27451e-05	0.320891	0.251	0.15	0.448883	Cytotoxic	CHSY1
1.28316e-05	0.287758	0.431	0.32	0.451929	Cytotoxic	RGS19
1.32311e-05	0.290687	0.581	0.491	0.466001	Cytotoxic	RAB14
1.43454e-05	0.318774	0.451	0.358	0.505244	Cytotoxic	CLTC
1.47594e-05	0.341785	0.67	0.59	0.519827	Cytotoxic	DYNLT1
1.53567e-05	0.287579	0.534	0.42	0.540863	Cytotoxic	IL10RA
1.65223e-05	0.293225	0.49	0.384	0.581915	Cytotoxic	MAPKAPK2
1.68446e-05	0.368715	0.823	0.718	0.593266	Cytotoxic	ARHGEF3
1.7953e-05	0.293845	0.319	0.217	0.632306	Cytotoxic	NBEAL2
1.79893e-05	0.292079	0.708	0.632	0.633584	Cytotoxic	LYST
1.98192e-05	0.30994	0.413	0.31	0.698032	Cytotoxic	TSPAN14
1.98408e-05	0.31969	0.301	0.201	0.698794	Cytotoxic	ECH1
2.12003e-05	0.287168	0.587	0.472	0.746674	Cytotoxic	PSMA5
2.1813e-05	0.257853	0.569	0.452	0.768255	Cytotoxic	OPTN
2.23373e-05	0.280065	0.791	0.731	0.786721	Cytotoxic	CD53
2.32621e-05	0.308044	0.69	0.619	0.819292	Cytotoxic	TBC1D10C
2.39875e-05	0.3051	0.251	0.158	0.84484	Cytotoxic	MAST3
2.49416e-05	0.250331	0.858	0.796	0.878443	Cytotoxic	FXYD5
2.58289e-05	0.429694	0.552	0.488	0.909694	Cytotoxic	SLC9A3R1
2.60869e-05	0.314112	0.392	0.285	0.918782	Cytotoxic	CA5B
2.65707e-05	0.383384	0.667	0.611	0.935821	Cytotoxic	PIK3R1
2.78525e-05	0.27107	0.519	0.401	0.980965	Cytotoxic	NT5DC1
2.83444e-05	0.285647	0.708	0.661	0.998291	Cytotoxic	GNG5
2.93262e-05	0.298741	0.313	0.206	1	Cytotoxic	CDYL2
3.01651e-05	0.315906	0.36	0.263	1	Cytotoxic	PTTG1IP
3.06952e-05	0.253728	0.283	0.183	1	Cytotoxic	BLCAP
3.09168e-05	0.389073	0.404	0.302	1	Cytotoxic	KIF13B
3.11838e-05	0.280831	0.655	0.565	1	Cytotoxic	COPE
3.25384e-05	0.266968	0.522	0.426	1	Cytotoxic	TRIM26
3.26041e-05	0.741423	0.286	0.195	1	Cytotoxic	APBB2
3.28904e-05	0.299186	0.59	0.5	1	Cytotoxic	CCPG1
3.44441e-05	0.259645	0.392	0.279	1	Cytotoxic	TXNRD1
3.47165e-05	0.292764	0.752	0.689	1	Cytotoxic	ITCH
3.71181e-05	0.286297	0.342	0.241	1	Cytotoxic	ABCB10
3.71249e-05	0.394427	0.504	0.395	1	Cytotoxic	LOC114671808
3.94709e-05	0.279319	0.611	0.525	1	Cytotoxic	BRD9
4.0997e-05	0.3279	0.572	0.483	1	Cytotoxic	ARPC5L
4.26041e-05	0.319629	0.873	0.819	1	Cytotoxic	LOC719702
4.47179e-05	0.269811	0.324	0.22	1	Cytotoxic	UBXN2B
4.73605e-05	0.267579	0.292	0.193	1	Cytotoxic	RMC1
5.39994e-05	0.255744	0.481	0.395	1	Cytotoxic	RNPEPL1
5.61505e-05	0.311647	0.404	0.308	1	Cytotoxic	DERL1
5.63053e-05	0.315943	0.655	0.57	1	Cytotoxic	SCP2
5.69867e-05	0.26659	0.351	0.257	1	Cytotoxic	MYO9B
5.7433e-05	0.260337	0.351	0.243	1	Cytotoxic	FAM102B
5.83403e-05	0.398052	0.56	0.464	1	Cytotoxic	TBC1D22A
6.03044e-05	0.277037	0.516	0.421	1	Cytotoxic	DCAF7
6.10036e-05	0.285205	0.543	0.444	1	Cytotoxic	GMCL1
6.12414e-05	0.252944	0.838	0.785	1	Cytotoxic	LOC719250
6.28557e-05	0.421992	0.652	0.571	1	Cytotoxic	BCAS3
6.29158e-05	0.261801	0.463	0.361	1	Cytotoxic	BCAP31
7.37863e-05	0.328909	0.643	0.56	1	Cytotoxic	KIAA1257
7.49453e-05	0.634928	0.555	0.481	1	Cytotoxic	LOC100426197
7.61838e-05	0.37769	0.475	0.392	1	Cytotoxic	RNF167
7.69894e-05	0.255709	0.847	0.771	1	Cytotoxic	MAP2K2
7.89656e-05	0.284062	0.625	0.533	1	Cytotoxic	TMEM160
7.97158e-05	0.349931	0.478	0.382	1	Cytotoxic	AUH
8.16536e-05	0.253329	0.746	0.666	1	Cytotoxic	ATP6V0E1
8.32326e-05	0.264961	0.472	0.37	1	Cytotoxic	KIAA2026
9.8625e-05	0.255799	0.861	0.802	1	Cytotoxic	YWHAB
0.000100152	0.30222	0.504	0.409	1	Cytotoxic	P2RY8
0.000101914	0.326002	0.49	0.395	1	Cytotoxic	BCL7C
0.000108536	0.283508	0.72	0.624	1	Cytotoxic	FMNL1
0.000120962	0.274325	0.732	0.664	1	Cytotoxic	PTBP3
0.000128101	0.299044	0.575	0.48	1	Cytotoxic	COPA
0.000132329	0.295046	0.339	0.238	1	Cytotoxic	SWT1
0.000141451	0.252233	0.729	0.655	1	Cytotoxic	CD47
0.000149668	0.25318	0.378	0.289	1	Cytotoxic	POLD4
0.000153437	0.272323	0.327	0.235	1	Cytotoxic	FBXO8
0.000154145	0.278047	0.655	0.57	1	Cytotoxic	CD63
0.000171607	0.307456	0.74	0.661	1	Cytotoxic	CAST
0.000183055	0.261634	0.289	0.197	1	Cytotoxic	LDAH
0.000183341	0.384746	0.295	0.211	1	Cytotoxic	LOC106996755
0.000186054	0.292944	0.478	0.381	1	Cytotoxic	CDK6
0.000189225	0.26385	0.761	0.697	1	Cytotoxic	PTPRA
0.000196945	0.277497	0.378	0.283	1	Cytotoxic	ACOX1
0.000198822	0.250495	0.684	0.599	1	Cytotoxic	LCP2
0.000210762	0.282084	0.72	0.642	1	Cytotoxic	LOC106997893
0.00021537	0.271386	0.431	0.334	1	Cytotoxic	GAK
0.000218957	0.269837	0.448	0.353	1	Cytotoxic	PARP14
0.000227553	0.299593	0.448	0.356	1	Cytotoxic	MT2A
0.000233613	0.306891	0.714	0.652	1	Cytotoxic	RASGRP1
0.000249597	0.259793	0.528	0.433	1	Cytotoxic	LOC697280
0.000277441	0.251439	0.251	0.163	1	Cytotoxic	RNF146
0.000282755	0.395211	0.72	0.678	1	Cytotoxic	MAMU-A
0.000285556	0.283893	0.413	0.324	1	Cytotoxic	CRADD
0.000293975	0.29883	0.469	0.393	1	Cytotoxic	KLHL2
0.000297515	0.29748	0.54	0.454	1	Cytotoxic	NFATC2
0.000299019	0.33135	0.575	0.498	1	Cytotoxic	LOC720132
0.000311656	0.29247	0.463	0.381	1	Cytotoxic	PRKAR1A
0.000315835	0.288011	0.54	0.467	1	Cytotoxic	UBR2
0.00032596	0.337512	0.599	0.525	1	Cytotoxic	RPS6KC1
0.000338451	0.272231	0.622	0.508	1	Cytotoxic	CRYBG1
0.000377693	0.284642	0.655	0.565	1	Cytotoxic	PPP1CA
0.000387334	0.277816	0.525	0.441	1	Cytotoxic	PPM1B
0.00044923	0.251958	0.507	0.413	1	Cytotoxic	IER3IP1
0.000480805	0.306805	0.404	0.337	1	Cytotoxic	ATAD1
0.000482767	0.263204	0.625	0.537	1	Cytotoxic	TRERF1
0.000490948	0.2636	0.369	0.286	1	Cytotoxic	IARS2
0.00050438	0.294695	0.634	0.568	1	Cytotoxic	CCSER2
0.000506637	0.316554	0.401	0.297	1	Cytotoxic	CD96
0.000515109	0.296502	0.416	0.327	1	Cytotoxic	MAP2K6
0.000515835	0.260101	0.36	0.271	1	Cytotoxic	TIMP1
0.000536559	0.263982	0.507	0.444	1	Cytotoxic	VASP
0.000547728	0.281499	0.711	0.649	1	Cytotoxic	GSK3B
0.000570348	0.272263	0.546	0.471	1	Cytotoxic	DRAP1
0.00057066	0.279362	0.628	0.579	1	Cytotoxic	SMAP2
0.00057439	0.260882	0.593	0.522	1	Cytotoxic	EIF4G3
0.000608327	0.366528	0.351	0.271	1	Cytotoxic	SECISBP2L
0.000657661	0.272807	0.463	0.384	1	Cytotoxic	IRF9
0.000658245	0.365004	0.407	0.319	1	Cytotoxic	KIF1B
0.000663709	0.272083	0.304	0.226	1	Cytotoxic	TAPBPL
0.000665083	0.258836	0.584	0.502	1	Cytotoxic	PHF21A
0.000692218	0.308435	0.372	0.288	1	Cytotoxic	LPGAT1
0.000701793	0.250157	0.481	0.396	1	Cytotoxic	STX16
0.000746235	0.257941	0.531	0.469	1	Cytotoxic	HECA
0.00075927	0.254606	0.342	0.266	1	Cytotoxic	TMED3
0.000775367	0.253009	0.549	0.471	1	Cytotoxic	PLEKHA2
0.000775901	0.272993	0.398	0.327	1	Cytotoxic	EBP
0.000886978	0.290462	0.634	0.57	1	Cytotoxic	MGST3
0.00104564	0.256393	0.572	0.5	1	Cytotoxic	PRMT2
0.00110486	0.358363	0.54	0.461	1	Cytotoxic	EHBP1
0.00121908	0.254132	0.398	0.322	1	Cytotoxic	EMC7
0.00127477	0.26127	0.295	0.214	1	Cytotoxic	CD8A
0.00133699	0.28498	0.434	0.354	1	Cytotoxic	RAB11A
0.00145967	0.309378	0.546	0.498	1	Cytotoxic	FKBP8
0.00148323	0.277827	0.46	0.387	1	Cytotoxic	RNF169
0.00150156	0.261033	0.56	0.511	1	Cytotoxic	CMTM6
0.00157339	0.272869	0.605	0.553	1	Cytotoxic	CIB1
0.00196398	0.264421	0.569	0.52	1	Cytotoxic	PSMA1
0.00203283	0.25144	0.319	0.245	1	Cytotoxic	TMEM9B
0.00218156	0.252874	0.811	0.74	1	Cytotoxic	ZFAND3
0.00224964	0.254031	0.56	0.522	1	Cytotoxic	RAB10
0.00227351	0.274691	0.608	0.557	1	Cytotoxic	GRB2
0.00236196	0.304299	0.257	0.192	1	Cytotoxic	VCL
0.00260356	0.275001	0.375	0.307	1	Cytotoxic	BTN3A1
0.00366034	0.466433	0.434	0.382	1	Cytotoxic	LOC106995452
0.00389141	0.263882	0.407	0.351	1	Cytotoxic	KIDINS220
0.00410797	0.27649	0.419	0.372	1	Cytotoxic	EFCAB14
0.00495814	0.267494	0.286	0.231	1	Cytotoxic	PHF12
0.0050089	0.263527	0.661	0.633	1	Cytotoxic	KDM4C
0.00516984	0.42706	0.619	0.536	1	Cytotoxic	IFI6
0.00526096	0.255177	0.375	0.311	1	Cytotoxic	SACM1L
0.00544177	0.259813	0.375	0.32	1	Cytotoxic	DCTN2
0.00556372	0.412315	0.425	0.375	1	Cytotoxic	CAPN7
0.00648176	0.286554	0.265	0.207	1	Cytotoxic	EXT2
0.00705986	0.268631	0.572	0.526	1	Cytotoxic	STX8
0.00783537	0.265399	0.487	0.44	1	Cytotoxic	ACTB

## Sheet: EM or TRM
p_val	avg_log2FC	pct.1	pct.2	p_val_adj	cluster	gene
1.95538e-31	1.42444	0.355	0.071	6.88685e-27	EM/TRM	AHR
2.79261e-30	1.37561	0.635	0.304	9.83557e-26	EM/TRM	ICOS
4.15662e-29	1.04845	0.369	0.084	1.46396e-24	EM/TRM	ARHGAP10
9.05138e-28	1.01991	0.543	0.206	3.1879e-23	EM/TRM	GPRIN3
1.75176e-27	1.29862	0.379	0.098	6.16971e-23	EM/TRM	ALCAM
2.54899e-26	1.37105	0.504	0.203	8.97755e-22	EM/TRM	RUNX2
6.37829e-26	1.47541	0.645	0.336	2.24643e-21	EM/TRM	NFKB1
6.85596e-26	1.14326	0.546	0.236	2.41467e-21	EM/TRM	GPR183
1.26731e-24	1.45813	0.539	0.24	4.46346e-20	EM/TRM	FOS
1.78313e-24	0.929971	0.709	0.388	6.28019e-20	EM/TRM	SPOCK2
5.94414e-23	1.40114	0.461	0.183	2.09353e-18	EM/TRM	FOSB
1.21709e-21	1.46948	0.72	0.475	4.2866e-17	EM/TRM	BICDL1
1.54101e-21	0.69809	0.426	0.148	5.42744e-17	EM/TRM	CD28
1.85651e-20	0.784656	0.794	0.486	6.53864e-16	EM/TRM	PAG1
5.05769e-20	0.940859	0.826	0.656	1.78132e-15	EM/TRM	MGAT5
9.3275e-19	1.63728	0.606	0.37	3.28515e-14	EM/TRM	KEG06-p04
1.65162e-18	0.816768	0.316	0.101	5.817e-14	EM/TRM	CSRNP1
5.3686e-17	0.798418	0.695	0.421	1.89082e-12	EM/TRM	ZEB1
5.61147e-17	0.950699	0.858	0.73	1.97636e-12	EM/TRM	FAM107B
5.7606e-17	0.746974	0.858	0.646	2.02888e-12	EM/TRM	LTB
6.57106e-17	0.679327	0.28	0.081	2.31433e-12	EM/TRM	ITGA1
1.01089e-16	1.29183	0.89	0.799	3.56037e-12	EM/TRM	SIK3
2.57277e-16	0.864881	0.436	0.202	9.06129e-12	EM/TRM	GRAMD1B
7.40016e-16	0.888892	0.975	0.939	2.60634e-11	EM/TRM	LOC708686
8.36174e-16	0.822285	0.355	0.145	2.945e-11	EM/TRM	MPZL3
5.22943e-15	1.03	0.369	0.161	1.84181e-10	EM/TRM	ELL2
5.3847e-15	0.673064	0.479	0.249	1.89649e-10	EM/TRM	ZC3H12D
8.79767e-15	0.62844	0.504	0.266	3.09854e-10	EM/TRM	NFKBIZ
1.43185e-14	1.01095	0.67	0.448	5.04296e-10	EM/TRM	CHN2
3.89046e-14	1.00803	0.277	0.094	1.37022e-09	EM/TRM	LMNA
5.48434e-14	1.1696	0.691	0.516	1.93159e-09	EM/TRM	ZFP36
6.20338e-14	0.995572	0.72	0.579	2.18483e-09	EM/TRM	DDX3X
7.86349e-14	0.876924	0.858	0.798	2.76952e-09	EM/TRM	PABPC1
1.8363e-13	0.639926	0.284	0.102	6.46744e-09	EM/TRM	DUSP2
4.0775e-13	0.774699	0.404	0.199	1.43609e-08	EM/TRM	NEDD4L
5.75732e-13	0.728433	0.333	0.142	2.02773e-08	EM/TRM	GADD45B
6.4323e-13	0.879562	0.688	0.502	2.26545e-08	EM/TRM	PDE4B
7.48473e-13	0.516686	0.855	0.727	2.63612e-08	EM/TRM	NDFIP1
8.08391e-13	0.900986	0.709	0.535	2.84715e-08	EM/TRM	HSPA5
1.18925e-12	1.07411	0.624	0.472	4.18854e-08	EM/TRM	ARHGAP26
1.25828e-12	1.75496	0.585	0.403	4.43168e-08	EM/TRM	RPS15A
1.56154e-12	0.647165	0.344	0.154	5.49976e-08	EM/TRM	DUSP5
1.61359e-12	0.679857	0.5	0.275	5.68306e-08	EM/TRM	GALM
1.79155e-12	0.710776	0.33	0.144	6.30984e-08	EM/TRM	KDM6B
2.124e-12	0.587875	0.826	0.72	7.48073e-08	EM/TRM	CDC14A
4.0778e-12	0.801355	0.521	0.334	1.4362e-07	EM/TRM	USP36
5.45601e-12	0.384878	0.294	0.112	1.92161e-07	EM/TRM	DPEP2
8.66986e-12	0.72735	0.56	0.371	3.05352e-07	EM/TRM	PELI1
1.7844e-11	0.733868	0.691	0.518	6.28465e-07	EM/TRM	TTC39C
1.80642e-11	0.724572	0.262	0.102	6.36222e-07	EM/TRM	CD83
2.21302e-11	0.714392	0.809	0.676	7.79427e-07	EM/TRM	BCL2
2.70384e-11	0.674355	0.277	0.115	9.52293e-07	EM/TRM	GPR65
3.30139e-11	0.497008	0.979	0.949	1.16275e-06	EM/TRM	CHD2
3.6021e-11	1.20113	0.479	0.312	1.26866e-06	EM/TRM	NR4A2
3.73676e-11	0.844311	0.809	0.698	1.31609e-06	EM/TRM	ARIH1
6.22979e-11	0.628923	0.287	0.129	2.19413e-06	EM/TRM	STX3
6.47548e-11	0.62354	0.89	0.811	2.28066e-06	EM/TRM	ELMO1
8.82859e-11	0.551679	0.762	0.644	3.10943e-06	EM/TRM	CCNL1
9.30171e-11	0.639651	0.326	0.161	3.27606e-06	EM/TRM	SLC7A5
1.16848e-10	0.627792	0.266	0.112	4.11539e-06	EM/TRM	TFRC
1.24038e-10	0.746964	0.752	0.613	4.36862e-06	EM/TRM	JUNB
1.26993e-10	0.705906	0.78	0.642	4.47271e-06	EM/TRM	DIP2B
1.65752e-10	0.797363	0.816	0.738	5.83778e-06	EM/TRM	EZR
1.81091e-10	0.806927	0.773	0.683	6.37801e-06	EM/TRM	INPP4B
2.08142e-10	0.964667	0.762	0.664	7.33074e-06	EM/TRM	RGCC
2.56471e-10	0.66902	0.511	0.329	9.03292e-06	EM/TRM	PTGER4
3.02071e-10	0.584232	1	1	1.0639e-05	EM/TRM	KEG06-r01
4.32063e-10	0.556486	0.301	0.138	1.52173e-05	EM/TRM	DUSP10
4.68705e-10	0.471123	0.365	0.185	1.65078e-05	EM/TRM	NABP1
5.8035e-10	0.536391	0.922	0.9	2.04399e-05	EM/TRM	VIM
6.54159e-10	0.592251	0.436	0.257	2.30395e-05	EM/TRM	GATA3
7.18084e-10	0.813412	0.55	0.368	2.52909e-05	EM/TRM	SLC2A3
9.68968e-10	1.3543	0.936	0.952	3.41271e-05	EM/TRM	KEG06-r02
1.1675e-09	1.03079	0.592	0.45	4.11195e-05	EM/TRM	LOC114674108
1.20681e-09	0.796989	0.677	0.528	4.25039e-05	EM/TRM	NFKBIA
1.29717e-09	0.524719	0.858	0.804	4.56862e-05	EM/TRM	YWHAZ
2.0981e-09	0.730461	0.599	0.445	7.38949e-05	EM/TRM	REL
2.45139e-09	0.491928	0.532	0.344	8.63378e-05	EM/TRM	PPP1R15A
2.49173e-09	0.713803	0.468	0.304	8.77589e-05	EM/TRM	LMBR1
3.65958e-09	0.591524	0.848	0.765	0.00012889	EM/TRM	KMT2E
4.00728e-09	0.848071	0.89	0.794	0.000141136	EM/TRM	CD44
4.83205e-09	0.651911	0.45	0.286	0.000170185	EM/TRM	PER1
5.49792e-09	0.685942	0.461	0.299	0.000193637	EM/TRM	IVNS1ABP
6.15133e-09	0.658752	0.851	0.747	0.00021665	EM/TRM	KLF6
6.40288e-09	0.78246	0.496	0.349	0.000225509	EM/TRM	SUCO
6.94786e-09	0.606496	0.379	0.219	0.000244704	EM/TRM	CCDC97
8.84384e-09	1.43089	0.429	0.275	0.00031148	EM/TRM	GAS7
1.00987e-08	0.401313	0.309	0.149	0.000355675	EM/TRM	TNFSF10
1.02162e-08	0.654847	0.433	0.265	0.000359815	EM/TRM	SKI
1.27205e-08	0.548684	0.298	0.151	0.000448015	EM/TRM	TNFRSF10D
1.7096e-08	0.632541	0.528	0.376	0.000602123	EM/TRM	RBPJ
2.30179e-08	0.852426	0.635	0.511	0.00081069	EM/TRM	TENT5C
2.98956e-08	0.504361	0.305	0.161	0.00105292	EM/TRM	ELL
4.43384e-08	0.903865	0.812	0.728	0.0015616	EM/TRM	DENND4A
4.52258e-08	0.390836	0.291	0.144	0.00159285	EM/TRM	FAM102A
5.2678e-08	0.7462	0.351	0.201	0.00185532	EM/TRM	ZSWIM4
5.48185e-08	0.62072	0.436	0.273	0.00193071	EM/TRM	BTG2
6.37737e-08	0.711982	0.55	0.403	0.00224611	EM/TRM	LOC708994
6.96799e-08	0.384862	0.723	0.559	0.00245413	EM/TRM	LOC106999943
7.74195e-08	0.813491	0.638	0.506	0.00272672	EM/TRM	RAB8B
7.99099e-08	0.398464	0.642	0.472	0.00281443	EM/TRM	PPP4R3A
9.38401e-08	0.423075	0.691	0.515	0.00330505	EM/TRM	AFF1
1.09484e-07	0.941177	0.461	0.323	0.00385602	EM/TRM	FAM129A
1.16007e-07	0.348348	0.599	0.411	0.00408577	EM/TRM	LOC114674016
1.20302e-07	0.519493	0.716	0.589	0.00423705	EM/TRM	TOP1
1.6883e-07	0.283367	0.369	0.198	0.00594618	EM/TRM	TNFSF8
1.98667e-07	0.644721	0.482	0.33	0.00699707	EM/TRM	SYNE2
2.5723e-07	0.399507	0.337	0.181	0.00905964	EM/TRM	IL6R
2.69689e-07	0.495205	0.652	0.511	0.00949843	EM/TRM	ARF4
2.71742e-07	0.64492	0.316	0.183	0.00957076	EM/TRM	RNF19B
2.74771e-07	0.469124	0.355	0.206	0.00967743	EM/TRM	DAAM1
2.98832e-07	0.524119	0.631	0.523	0.0105249	EM/TRM	TAB2
3.10187e-07	0.530643	0.638	0.492	0.0109248	EM/TRM	AKT3
3.43787e-07	0.634603	0.624	0.528	0.0121082	EM/TRM	YPEL5
3.61197e-07	0.375513	0.319	0.182	0.0127213	EM/TRM	KIRREL3
4.3887e-07	0.555222	0.73	0.629	0.015457	EM/TRM	MAMU-A3
4.45212e-07	0.500855	0.858	0.863	0.0156804	EM/TRM	JMJD1C
5.72769e-07	0.831138	0.422	0.286	0.0201729	EM/TRM	EXT1
6.4799e-07	0.444955	0.851	0.792	0.0228222	EM/TRM	KAT6A
6.57747e-07	0.513675	0.684	0.555	0.0231659	EM/TRM	ATXN7
6.78557e-07	0.490732	0.83	0.808	0.0238988	EM/TRM	NCOA3
7.1712e-07	0.532144	0.429	0.29	0.025257	EM/TRM	SUSD6
7.18233e-07	0.439356	0.677	0.576	0.0252962	EM/TRM	CYLD
7.56528e-07	0.549886	0.351	0.215	0.0266449	EM/TRM	IFRD1
9.01088e-07	1.28134	0.582	0.452	0.0317363	EM/TRM	TUBA4A
9.30043e-07	0.534104	0.411	0.27	0.0327561	EM/TRM	RYBP
1.08984e-06	0.559919	0.699	0.58	0.0383842	EM/TRM	LOC713490
1.11953e-06	0.6688	0.348	0.218	0.03943	EM/TRM	DOCK9
1.1279e-06	0.46383	0.383	0.245	0.0397246	EM/TRM	SREBF2
1.13593e-06	0.415788	0.844	0.835	0.0400075	EM/TRM	CYTH1
1.2875e-06	0.56198	0.621	0.502	0.0453457	EM/TRM	IER2
1.39779e-06	0.380302	0.67	0.543	0.0492301	EM/TRM	YTHDC1
1.51562e-06	0.547846	0.791	0.716	0.0533802	EM/TRM	SLC38A1
1.96717e-06	0.393011	0.645	0.529	0.0692836	EM/TRM	ALDOA
2.01466e-06	0.616766	0.638	0.575	0.0709564	EM/TRM	G3BP2
2.01626e-06	0.463845	0.518	0.383	0.0710126	EM/TRM	GSPT1
2.09832e-06	0.320817	0.972	0.982	0.0739029	EM/TRM	MBNL1
2.13351e-06	0.559216	0.713	0.659	0.0751424	EM/TRM	ASAP1
2.20381e-06	0.310042	0.291	0.159	0.077618	EM/TRM	GRAMD4
2.32214e-06	0.589186	0.482	0.337	0.0817859	EM/TRM	TSC22D2
2.33677e-06	0.359116	0.848	0.842	0.0823011	EM/TRM	ESYT2
2.49284e-06	0.733399	0.638	0.509	0.0877978	EM/TRM	JUN
2.72646e-06	0.385838	0.28	0.149	0.0960258	EM/TRM	PTMS
2.93886e-06	0.578324	0.351	0.225	0.103507	EM/TRM	SERTAD1
3.28112e-06	0.516527	0.273	0.156	0.115561	EM/TRM	RASGEF1B
3.43421e-06	0.443002	0.589	0.488	0.120953	EM/TRM	ATF4
3.46267e-06	0.405204	0.365	0.236	0.121955	EM/TRM	PTP4A1
3.50405e-06	0.65033	0.684	0.615	0.123413	EM/TRM	LOC694372
3.97755e-06	0.671424	0.489	0.364	0.140089	EM/TRM	HSPH1
4.01895e-06	0.539461	0.496	0.385	0.141548	EM/TRM	TRAF3
4.06945e-06	0.529269	0.645	0.538	0.143326	EM/TRM	NUP98
4.16975e-06	0.526837	0.351	0.228	0.146858	EM/TRM	SIK1
4.35552e-06	0.52847	0.766	0.666	0.153401	EM/TRM	RFX3
4.35977e-06	0.532323	0.972	0.979	0.153551	EM/TRM	KEG06-p11
4.76283e-06	0.446366	0.475	0.35	0.167747	EM/TRM	RPS6KB1
4.81931e-06	0.500785	0.44	0.321	0.169736	EM/TRM	LPXN
4.82206e-06	0.476179	0.691	0.603	0.169833	EM/TRM	GLS
4.87904e-06	0.719372	0.83	0.734	0.17184	EM/TRM	CHST11
6.30827e-06	0.786133	0.553	0.457	0.222177	EM/TRM	JARID2
6.31421e-06	0.413012	0.387	0.255	0.222386	EM/TRM	SNX25
6.511e-06	0.613652	0.518	0.417	0.229317	EM/TRM	NUFIP2
7.00921e-06	0.446657	0.553	0.425	0.246865	EM/TRM	C20H16orf72
7.47921e-06	0.771118	0.752	0.683	0.263418	EM/TRM	ADGRE5
7.70299e-06	0.583276	0.358	0.235	0.271299	EM/TRM	TSPAN5
8.04238e-06	0.550825	0.312	0.198	0.283252	EM/TRM	TOB1
8.38398e-06	0.56277	0.574	0.452	0.295284	EM/TRM	PPP1R16B
8.98704e-06	0.437228	0.67	0.542	0.316524	EM/TRM	LOC697476
1.0214e-05	0.354511	0.323	0.195	0.359736	EM/TRM	LDLRAD4
1.11456e-05	0.581571	0.348	0.218	0.392548	EM/TRM	VAV3
1.19573e-05	0.475607	0.447	0.33	0.421135	EM/TRM	KCNA3
1.20325e-05	0.423037	0.528	0.414	0.423783	EM/TRM	LRIG1
1.34885e-05	0.583139	0.571	0.464	0.475065	EM/TRM	GLUD1
1.6004e-05	0.365121	0.287	0.175	0.563662	EM/TRM	LST1
1.65587e-05	0.39277	0.645	0.549	0.583196	EM/TRM	SMAP1
1.68247e-05	0.466542	0.465	0.329	0.592565	EM/TRM	UBR4
1.70113e-05	0.349043	0.351	0.219	0.599139	EM/TRM	PCNX2
1.70816e-05	0.864038	0.738	0.724	0.601613	EM/TRM	ZFP36L2
1.7171e-05	0.498329	0.621	0.495	0.604762	EM/TRM	ELOVL5
1.77246e-05	0.411789	0.691	0.586	0.624259	EM/TRM	DHX9
1.77898e-05	0.491109	0.28	0.165	0.626555	EM/TRM	MYO1D
1.79154e-05	0.520449	0.635	0.541	0.630981	EM/TRM	USP9X
1.89029e-05	0.334693	0.936	0.979	0.665762	EM/TRM	EIF1
1.97149e-05	0.582895	0.521	0.378	0.694358	EM/TRM	BTBD11
2.08147e-05	0.569187	0.514	0.424	0.733094	EM/TRM	DUSP1
2.13341e-05	0.327879	0.255	0.142	0.751387	EM/TRM	APP
2.17371e-05	0.315765	0.319	0.195	0.765581	EM/TRM	SKIL
2.53776e-05	0.439197	0.738	0.676	0.893797	EM/TRM	GPBP1
2.62362e-05	0.387642	0.259	0.152	0.924039	EM/TRM	TIPARP
2.62927e-05	0.455844	0.415	0.29	0.926027	EM/TRM	HNRNPLL
2.6416e-05	0.468195	0.635	0.553	0.930373	EM/TRM	EIF4G2
2.91772e-05	0.411495	0.837	0.794	1	EM/TRM	HNRNPC
3.01865e-05	0.365525	0.83	0.805	1	EM/TRM	SARAF
3.4059e-05	0.703647	0.628	0.525	1	EM/TRM	SPAG9
3.55823e-05	0.427215	0.362	0.243	1	EM/TRM	BIRC3
4.25991e-05	0.380485	0.543	0.42	1	EM/TRM	ATP1A1
4.27303e-05	0.53794	0.603	0.543	1	EM/TRM	CNOT2
4.4896e-05	0.258746	0.858	0.822	1	EM/TRM	PRRC2C
4.55019e-05	0.37907	0.287	0.178	1	EM/TRM	LOC722929
4.95784e-05	0.337261	0.482	0.346	1	EM/TRM	MAF
5.01314e-05	0.316307	0.394	0.27	1	EM/TRM	AGO2
5.19902e-05	0.446896	0.426	0.299	1	EM/TRM	BCL2A1
5.29224e-05	0.419742	0.596	0.484	1	EM/TRM	STK24
5.45962e-05	0.312404	0.411	0.293	1	EM/TRM	CORO7
5.46251e-05	0.451643	0.738	0.691	1	EM/TRM	SETD2
5.76037e-05	0.366556	0.635	0.526	1	EM/TRM	CHD1
6.01848e-05	0.39401	0.922	0.893	1	EM/TRM	ANKRD11
6.08911e-05	0.400465	0.968	0.979	1	EM/TRM	KEG06-p13
6.18274e-05	0.326751	0.426	0.293	1	EM/TRM	SESN1
6.46171e-05	0.484469	0.383	0.28	1	EM/TRM	HERPUD1
8.01168e-05	0.288118	0.801	0.76	1	EM/TRM	RNF213
8.11209e-05	0.421936	0.546	0.434	1	EM/TRM	WDR26
9.01234e-05	0.427794	0.809	0.799	1	EM/TRM	KMT2C
9.08754e-05	0.592788	0.333	0.228	1	EM/TRM	STAT5A
0.000103779	0.293509	0.904	0.903	1	EM/TRM	STK17B
0.000116707	0.406145	0.351	0.242	1	EM/TRM	HEXIM1
0.000118848	0.646442	0.617	0.535	1	EM/TRM	AHI1
0.000123856	0.257995	0.309	0.198	1	EM/TRM	MOB3A
0.000128749	0.331063	0.918	0.935	1	EM/TRM	ANKRD12
0.000130238	0.470999	0.358	0.245	1	EM/TRM	PDZRN3
0.00013143	0.487853	0.333	0.236	1	EM/TRM	PRMT9
0.000132771	0.371035	0.521	0.413	1	EM/TRM	STAU1
0.000137175	0.400375	0.578	0.489	1	EM/TRM	N4BP1
0.000138638	0.283461	0.305	0.198	1	EM/TRM	RBM38
0.000141529	0.340359	0.252	0.156	1	EM/TRM	UGCG
0.000142123	0.330153	0.904	0.861	1	EM/TRM	RBM39
0.00014639	0.330353	0.426	0.314	1	EM/TRM	TXLNG
0.000147989	0.452179	0.844	0.836	1	EM/TRM	FYN
0.000149163	0.28412	0.259	0.158	1	EM/TRM	SLC25A25
0.000149486	0.560455	0.45	0.346	1	EM/TRM	IRAK2
0.000150727	0.323485	0.599	0.514	1	EM/TRM	CTNNB1
0.000151883	0.4553	0.379	0.276	1	EM/TRM	SMURF2
0.00015419	0.451399	0.493	0.397	1	EM/TRM	RLF
0.000155509	0.306693	0.273	0.169	1	EM/TRM	PRNP
0.000156133	0.323083	0.372	0.259	1	EM/TRM	BZW2
0.000158237	0.471632	0.383	0.27	1	EM/TRM	NRIP1
0.000158385	0.481583	0.652	0.58	1	EM/TRM	GOLGA4
0.000160165	0.921198	0.55	0.504	1	EM/TRM	TNFAIP3
0.000176006	0.369233	0.855	0.828	1	EM/TRM	ARID4B
0.00018185	0.369394	0.702	0.651	1	EM/TRM	PUM1
0.000196815	0.486967	0.337	0.242	1	EM/TRM	NAMPT
0.000217103	0.36707	0.691	0.62	1	EM/TRM	LOC694823
0.000235539	0.352059	0.291	0.189	1	EM/TRM	RAB11FIP1
0.000260706	0.362385	0.628	0.546	1	EM/TRM	ERO1B
0.000271421	0.305782	0.511	0.378	1	EM/TRM	INO80D
0.000272056	0.378348	0.695	0.609	1	EM/TRM	RHOH
0.00029293	0.423434	0.741	0.708	1	EM/TRM	DNAJB6
0.000307912	0.306719	0.262	0.165	1	EM/TRM	POC1B
0.000315338	0.427347	0.578	0.486	1	EM/TRM	BRD2
0.000327869	0.346575	0.699	0.629	1	EM/TRM	MCL1
0.000334525	0.297116	0.34	0.229	1	EM/TRM	RO60
0.000355038	0.316985	0.418	0.31	1	EM/TRM	UHRF1BP1L
0.000367699	0.299754	0.262	0.169	1	EM/TRM	PRKCI
0.000373368	0.295868	0.819	0.797	1	EM/TRM	MATR3
0.000377738	0.393232	0.418	0.307	1	EM/TRM	HERC6
0.0003851	0.492985	0.266	0.176	1	EM/TRM	ISG15
0.00042511	0.303508	0.578	0.455	1	EM/TRM	RAB1A
0.000425529	0.485723	0.454	0.351	1	EM/TRM	LOC706619
0.000442952	0.308041	0.553	0.467	1	EM/TRM	FLT3LG
0.000462543	0.320815	0.748	0.706	1	EM/TRM	RPL39
0.000469841	0.365991	0.468	0.357	1	EM/TRM	ATP2A2
0.000480716	0.335433	0.266	0.175	1	EM/TRM	NAF1
0.000488121	0.273296	0.681	0.607	1	EM/TRM	AFF4
0.000490993	0.330947	0.461	0.357	1	EM/TRM	BTAF1
0.000538333	0.29284	0.589	0.477	1	EM/TRM	TMEM123
0.000541709	0.353737	0.496	0.388	1	EM/TRM	MYADM
0.000543762	0.511195	0.755	0.745	1	EM/TRM	S100A6
0.00059037	0.346997	0.379	0.282	1	EM/TRM	TP53BP1
0.000642597	0.376589	0.397	0.294	1	EM/TRM	CSNK1G3
0.000647871	0.312639	0.443	0.329	1	EM/TRM	IL6ST
0.000709769	0.364862	0.738	0.68	1	EM/TRM	HIVEP2
0.000726018	0.353373	0.337	0.245	1	EM/TRM	RELB
0.000754409	0.383687	0.528	0.418	1	EM/TRM	NUP153
0.000759283	0.401101	0.684	0.597	1	EM/TRM	SCAF8
0.000816694	0.370893	0.376	0.289	1	EM/TRM	MFHAS1
0.000843835	0.364731	0.567	0.465	1	EM/TRM	PTPN2
0.000850409	0.357228	0.525	0.442	1	EM/TRM	H2AFJ
0.000866198	0.384594	0.489	0.408	1	EM/TRM	JMY
0.000905113	0.383904	0.66	0.595	1	EM/TRM	MAP4K4
0.000920493	0.808908	0.695	0.677	1	EM/TRM	CD69
0.000923334	0.599639	0.706	0.656	1	EM/TRM	KDM6A
0.000925607	0.257891	0.528	0.417	1	EM/TRM	RANBP9
0.000952167	0.305593	0.365	0.276	1	EM/TRM	ZFAND5
0.000962063	0.494401	0.422	0.346	1	EM/TRM	ZRANB1
0.000975821	0.388075	0.585	0.499	1	EM/TRM	CREM
0.00100231	0.334398	0.369	0.279	1	EM/TRM	C18H18orf25
0.00101998	0.29655	0.915	0.906	1	EM/TRM	SMCHD1
0.00104298	0.331302	0.287	0.195	1	EM/TRM	KLHL18
0.00105924	0.268796	0.273	0.182	1	EM/TRM	LOC114675937
0.00107004	0.502562	0.291	0.215	1	EM/TRM	SMAD7
0.00108509	0.363092	0.528	0.445	1	EM/TRM	LIMS1
0.0011084	0.321046	0.546	0.479	1	EM/TRM	CYB5A
0.00111701	0.425463	0.67	0.612	1	EM/TRM	STAT5B
0.00112207	0.407244	0.539	0.471	1	EM/TRM	PSME4
0.00113581	0.372112	0.652	0.597	1	EM/TRM	FOXO1
0.00120796	0.319274	0.5	0.424	1	EM/TRM	CARD11
0.00123154	0.406739	0.277	0.198	1	EM/TRM	TATDN2
0.00123269	0.315947	0.571	0.468	1	EM/TRM	INTS6
0.00125878	0.499463	0.411	0.324	1	EM/TRM	IFI27
0.00126639	0.592334	0.617	0.569	1	EM/TRM	CDK17
0.00126977	0.265259	0.709	0.65	1	EM/TRM	TLK1
0.00133574	0.293735	0.316	0.228	1	EM/TRM	SH3GL1
0.00144004	0.265981	0.621	0.542	1	EM/TRM	ABI1
0.00144609	0.392202	0.337	0.25	1	EM/TRM	ZNF267
0.0014548	0.297695	0.323	0.238	1	EM/TRM	TNIP1
0.00145584	0.536466	0.77	0.73	1	EM/TRM	PREX1
0.00150232	0.284719	0.362	0.266	1	EM/TRM	FAM168B
0.00153289	0.516531	0.606	0.555	1	EM/TRM	MAP3K2
0.00171973	0.496156	0.564	0.515	1	EM/TRM	SQSTM1
0.00174212	0.379147	0.642	0.579	1	EM/TRM	REV3L
0.00185264	0.361394	0.674	0.626	1	EM/TRM	TMEM131L
0.00186153	0.344722	0.255	0.169	1	EM/TRM	PDE8A
0.0019783	0.258255	0.493	0.394	1	EM/TRM	CNN2
0.00199465	0.291741	0.716	0.634	1	EM/TRM	SSBP2
0.00204052	0.326992	0.365	0.276	1	EM/TRM	MEF2D
0.00214056	0.337556	0.411	0.32	1	EM/TRM	PPP1R10
0.00228182	0.342968	0.351	0.265	1	EM/TRM	NF1
0.00236217	0.276309	0.39	0.302	1	EM/TRM	SYAP1
0.00236982	0.459633	0.358	0.277	1	EM/TRM	FRMD4B
0.00242035	0.319442	0.528	0.452	1	EM/TRM	AMD1
0.0026149	0.411235	0.667	0.605	1	EM/TRM	ARAP2
0.00266335	0.450716	0.479	0.407	1	EM/TRM	GABPB1
0.0026757	0.460582	0.333	0.266	1	EM/TRM	CASK
0.00269175	0.300008	0.426	0.336	1	EM/TRM	SAFB2
0.00270278	0.29781	0.635	0.539	1	EM/TRM	STAT3
0.00271609	0.324741	0.489	0.411	1	EM/TRM	CUL1
0.00271739	0.295286	0.255	0.169	1	EM/TRM	WARS2
0.00289935	0.409309	0.291	0.213	1	EM/TRM	SLC35D1
0.00291966	0.373893	0.472	0.39	1	EM/TRM	MDFIC
0.00295553	0.661048	0.567	0.532	1	EM/TRM	ITGB1
0.00303434	0.411463	0.599	0.535	1	EM/TRM	FBXO11
0.00314189	0.374227	0.383	0.296	1	EM/TRM	VPS54
0.00322094	0.523287	0.539	0.477	1	EM/TRM	CMIP
0.00323482	0.314134	0.28	0.193	1	EM/TRM	PDLIM5
0.00341932	0.298669	0.369	0.293	1	EM/TRM	LEPROTL1
0.00362711	0.47752	0.472	0.413	1	EM/TRM	BHLHE40
0.00369144	0.308337	0.78	0.747	1	EM/TRM	OSBPL8
0.00383509	0.320086	0.387	0.303	1	EM/TRM	PNPLA8
0.00391093	0.427251	0.897	0.937	1	EM/TRM	JUND
0.00396888	0.3398	0.415	0.34	1	EM/TRM	CCNH
0.00397425	0.333948	0.855	0.815	1	EM/TRM	SRSF7
0.00406854	0.283749	0.709	0.651	1	EM/TRM	FUS
0.00413426	0.310177	0.305	0.226	1	EM/TRM	ZNF331
0.00416894	0.406877	0.617	0.573	1	EM/TRM	SLC9A9
0.00420106	0.435955	0.543	0.465	1	EM/TRM	IMMP2L
0.00454011	0.331011	0.436	0.361	1	EM/TRM	POLR2A
0.00457087	0.354297	0.457	0.366	1	EM/TRM	HPCAL1
0.00485044	0.336497	0.298	0.215	1	EM/TRM	PLCL1
0.00504045	0.318565	0.447	0.37	1	EM/TRM	DDX21
0.00521579	0.536702	0.848	0.802	1	EM/TRM	GNG2
0.00524203	0.255864	0.723	0.653	1	EM/TRM	RERE
0.00529214	0.267947	0.571	0.498	1	EM/TRM	CCDC91
0.00531869	0.359171	0.521	0.451	1	EM/TRM	AHCTF1
0.00540942	0.34387	0.348	0.265	1	EM/TRM	ABCC1
0.0056676	0.342115	0.411	0.349	1	EM/TRM	RILPL2
0.00598327	0.372352	0.652	0.617	1	EM/TRM	BCLAF1
0.00605442	0.504739	0.621	0.559	1	EM/TRM	BTBD9
0.00605497	0.262566	0.309	0.232	1	EM/TRM	NDEL1
0.00608666	0.258499	0.27	0.198	1	EM/TRM	IGF2R
0.00613224	0.258306	0.326	0.245	1	EM/TRM	CHMP7
0.00659799	0.283746	0.667	0.61	1	EM/TRM	SMARCA5
0.00696569	0.302952	0.305	0.232	1	EM/TRM	TGFBR1
0.00735672	0.334248	0.656	0.58	1	EM/TRM	RHEB
0.00755459	0.275253	0.418	0.336	1	EM/TRM	SUPT5H
0.00830136	0.692668	0.482	0.435	1	EM/TRM	ZSWIM6
0.00850073	0.299531	0.511	0.467	1	EM/TRM	RHOF
0.00856075	0.326845	0.394	0.323	1	EM/TRM	UBAP1
0.00867281	0.326051	0.688	0.644	1	EM/TRM	LOC698045
0.00869394	0.258441	0.83	0.832	1	EM/TRM	ARL4C
0.00874061	0.535704	0.429	0.385	1	EM/TRM	RGS1
0.00894127	0.422172	0.294	0.225	1	EM/TRM	DUSP16
0.00903773	0.359745	0.294	0.228	1	EM/TRM	ARHGAP17
0.00911794	0.298353	0.287	0.216	1	EM/TRM	BRWD3
0.00922216	0.25005	0.394	0.316	1	EM/TRM	RALA
0.00955125	0.263013	0.738	0.714	1	EM/TRM	SFPQ
0.00973831	0.261643	0.624	0.596	1	EM/TRM	FGFR1OP2

## Sheet: Naive
p_val	avg_log2FC	pct.1	pct.2	p_val_adj	cluster	gene
3.14673e-104	1.79369	0.785	0.1	1.10828e-99	Naïve	RFLNB
3.06171e-102	2.11849	0.942	0.211	1.07833e-97	Naïve	LEF1
7.50764e-101	1.91035	0.855	0.145	2.64419e-96	Naïve	CA6
9.40775e-100	1.7023	0.756	0.094	3.31341e-95	Naïve	SELL
1.70181e-94	1.75592	0.835	0.166	5.99378e-90	Naïve	CERS6
1.71294e-89	2.02621	0.81	0.16	6.03299e-85	Naïve	GPHN
3.24107e-88	1.71375	0.719	0.098	1.14151e-83	Naïve	RASGRF2
9.61757e-88	1.8448	0.876	0.245	3.38731e-83	Naïve	PECAM1
1.63163e-84	1.05036	0.992	0.96	5.7466e-80	Naïve	RPL30
5.25323e-84	1.11927	0.983	0.953	1.85019e-79	Naïve	RPS27A-1
9.63689e-81	1.94101	0.905	0.283	3.39411e-76	Naïve	BACH2
1.02435e-78	1.02447	0.983	0.933	3.60776e-74	Naïve	RPL9
1.09949e-78	1.16923	0.983	0.948	3.87241e-74	Naïve	RPL10A
2.34312e-78	1.02347	0.971	0.956	8.25248e-74	Naïve	RPL22
2.72616e-76	1.3441	0.674	0.102	9.60155e-72	Naïve	SFRP5
3.63194e-76	1.17434	0.975	0.939	1.27917e-71	Naïve	LOC703455
1.92995e-75	1.06516	0.979	0.926	6.79727e-71	Naïve	RPS13
1.60966e-74	1.04579	0.975	0.931	5.66924e-70	Naïve	RPL35A
5.40071e-74	0.93787	0.983	0.952	1.90213e-69	Naïve	RPL6
1.11517e-73	1.00369	0.983	0.965	3.92762e-69	Naïve	RPS8
1.19748e-73	1.49056	0.839	0.242	4.21754e-69	Naïve	RCAN3
8.86802e-72	0.994751	0.971	0.941	3.12332e-67	Naïve	RPL34
4.79784e-71	1.10071	0.983	0.925	1.6898e-66	Naïve	RPS25
5.42987e-70	1.69484	0.686	0.131	1.9124e-65	Naïve	KCNQ5
8.80487e-70	1.42684	0.785	0.206	3.10108e-65	Naïve	ITGA6
1.1504e-69	0.94584	0.979	0.946	4.05171e-65	Naïve	RPS28
2.43471e-69	0.927473	0.983	0.945	8.57506e-65	Naïve	RPL5
2.94378e-69	1.56996	0.893	0.381	1.0368e-64	Naïve	SATB1
4.27356e-69	1.40179	0.835	0.24	1.50515e-64	Naïve	CD7
6.2282e-69	0.783968	0.983	0.965	2.19357e-64	Naïve	RPS15
9.88359e-69	0.894691	0.975	0.935	3.481e-64	Naïve	RPL24
1.83106e-66	0.825847	0.983	0.965	6.44898e-62	Naïve	RPS7
5.51151e-66	0.851481	0.983	0.943	1.94115e-61	Naïve	RPS23
8.59884e-66	0.82624	0.988	0.972	3.02851e-61	Naïve	RPS12
4.40415e-65	1.51429	0.756	0.19	1.55114e-60	Naïve	PLAC8
4.9739e-65	0.729126	0.988	0.958	1.75181e-60	Naïve	RPS10
7.5222e-65	0.860487	0.983	0.956	2.64932e-60	Naïve	RPL28
9.75791e-65	1.4635	0.835	0.311	3.43673e-60	Naïve	PDK1
1.12704e-64	0.801117	0.979	0.958	3.96944e-60	Naïve	RPS16
1.26034e-64	0.800682	0.979	0.956	4.43891e-60	Naïve	RPS21
2.53041e-64	0.960024	0.975	0.949	8.9121e-60	Naïve	RPL23
2.68529e-64	1.47814	0.661	0.132	9.45758e-60	Naïve	AFF3
3.00619e-63	1.33314	0.963	0.773	1.05878e-58	Naïve	LOC702677
3.18164e-63	1.19557	0.967	0.896	1.12057e-58	Naïve	RPL32
5.25462e-63	0.72195	0.996	0.98	1.85068e-58	Naïve	RPS18
7.26745e-63	0.921234	0.971	0.943	2.5596e-58	Naïve	RPL37A-1
7.34726e-63	0.923266	0.979	0.941	2.5877e-58	Naïve	NACA
8.28124e-63	0.897023	0.988	0.943	2.91665e-58	Naïve	RPL12
1.32152e-61	0.853671	0.983	0.941	4.65439e-57	Naïve	RPL21
3.34553e-61	1.29183	0.789	0.26	1.1783e-56	Naïve	TCF7
4.31893e-61	1.14493	0.971	0.871	1.52113e-56	Naïve	RPL37A
2.23999e-60	0.892813	0.979	0.956	7.88925e-56	Naïve	RPL38
1.22493e-59	0.794965	0.975	0.954	4.3142e-55	Naïve	RPL27A
1.738e-59	0.720587	0.992	0.957	6.12123e-55	Naïve	RPL18
1.71853e-58	0.767834	0.983	0.957	6.05266e-54	Naïve	RPS5
2.41724e-58	1.13788	0.715	0.215	8.51351e-54	Naïve	RGS10
2.79644e-56	0.685919	0.983	0.965	9.84906e-52	Naïve	RPLP1
6.06816e-56	1.27873	0.963	0.867	2.13721e-51	Naïve	FOXP1
1.49182e-55	1.32784	0.959	0.624	5.25419e-51	Naïve	LTB
1.83064e-55	0.785833	0.983	0.943	6.44752e-51	Naïve	RPS27
2.53657e-55	1.50098	0.579	0.109	8.93379e-51	Naïve	ST6GALNAC5
4.3825e-55	1.47283	0.909	0.478	1.54352e-50	Naïve	MAML2
1.31653e-54	1.03836	0.401	0.03	4.63682e-50	Naïve	SNED1
1.7493e-54	0.665388	0.992	0.976	6.16102e-50	Naïve	RPL13
2.01682e-54	1.27418	0.971	0.873	7.10325e-50	Naïve	EEF1A1
6.6024e-54	0.754276	0.983	0.966	2.32537e-49	Naïve	TPT1
1.05331e-53	0.728	0.983	0.952	3.70977e-49	Naïve	RPS26
1.4922e-53	1.19496	0.603	0.128	5.25553e-49	Naïve	2024-03-03
1.56354e-52	0.702714	0.988	0.956	5.5068e-48	Naïve	RPS4X
2.0176e-52	0.687221	0.992	0.97	7.10599e-48	Naïve	RPL13A
4.66204e-52	1.18965	0.95	0.723	1.64197e-47	Naïve	LOC107000809
4.85185e-52	0.733855	0.983	0.969	1.70882e-47	Naïve	RPL8
8.50791e-52	0.679866	0.975	0.968	2.99649e-47	Naïve	RPL41
4.39351e-51	1.0939	0.963	0.895	1.54739e-46	Naïve	RPL14
2.19128e-49	1.08938	0.736	0.24	7.71769e-45	Naïve	IL6ST
4.35558e-49	1.09504	0.942	0.81	1.53403e-44	Naïve	LOC114669857
8.53598e-48	1.21793	0.587	0.125	3.00637e-43	Naïve	PLCL1
1.19019e-47	1.18557	0.483	0.081	4.19186e-43	Naïve	UBE2E2
1.97777e-47	0.663215	0.983	0.958	6.9657e-43	Naïve	RPS14
8.09413e-47	0.635716	0.983	0.952	2.85075e-42	Naïve	RPLP2
4.08098e-46	0.720226	0.355	0.028	1.43732e-41	Naïve	TMIGD2
4.57389e-45	0.646558	0.971	0.941	1.61092e-40	Naïve	RPL19
6.89249e-45	0.621428	0.971	0.956	2.42753e-40	Naïve	RPL11
1.49713e-44	1.04051	0.541	0.132	5.27287e-40	Naïve	RETREG1
2.06776e-44	0.982812	0.583	0.153	7.28266e-40	Naïve	TESPA1
2.12578e-44	0.858167	0.967	0.926	7.48699e-40	Naïve	RPS24
1.53741e-43	0.882923	0.992	0.935	5.41474e-39	Naïve	RPS20
2.32439e-42	0.804282	0.426	0.067	8.18651e-38	Naïve	GSTT1
2.73697e-42	1.08849	0.649	0.222	9.6396e-38	Naïve	OXR1
7.00997e-42	1.17105	0.479	0.1	2.46891e-37	Naïve	MAML3
9.66609e-42	0.679375	0.967	0.939	3.4044e-37	Naïve	LOC712274
1.27031e-41	0.821888	0.959	0.919	4.47404e-37	Naïve	BTG1
1.50558e-41	0.620288	0.975	0.954	5.30265e-37	Naïve	RPSA
2.32442e-41	0.657219	0.983	0.943	8.1866e-37	Naïve	RPL15
3.22219e-41	0.888387	0.277	0.012	1.13486e-36	Naïve	SOX4
1.46922e-40	0.943055	0.975	0.879	5.1746e-36	Naïve	CAMK4
9.12006e-39	0.742675	0.393	0.062	3.21208e-34	Naïve	DIP2C
1.68728e-38	0.683299	0.988	0.938	5.9426e-34	Naïve	RPS2
1.82436e-38	1.02977	0.521	0.133	6.42539e-34	Naïve	NBEA
2.86754e-38	0.856438	0.971	0.922	1.00995e-33	Naïve	RPL37
5.09715e-38	0.571189	0.983	0.954	1.79522e-33	Naïve	RPS3
5.45422e-38	0.542377	0.983	0.962	1.92097e-33	Naïve	RPL3
5.6575e-38	0.731014	0.963	0.781	1.99257e-33	Naïve	RPS4Y1
2.32704e-37	0.56737	0.983	0.95	8.19582e-33	Naïve	RPL27
4.90001e-37	0.656647	0.979	0.949	1.72578e-32	Naïve	RACK1
5.04088e-37	0.621198	0.979	0.954	1.7754e-32	Naïve	RPLP0
6.00237e-37	1.15103	0.777	0.439	2.11403e-32	Naïve	LOC698383
9.71624e-37	0.528824	0.983	0.961	3.42206e-32	Naïve	RPL10
2.63635e-36	1.05555	0.818	0.489	9.28524e-32	Naïve	ADD3
4.31727e-36	0.9042	0.599	0.213	1.52054e-31	Naïve	FCMR
1.03834e-35	0.675569	0.963	0.906	3.65702e-31	Naïve	EEF1G
1.29871e-35	0.881081	0.942	0.712	4.57405e-31	Naïve	LOC106996680
1.36014e-35	0.904783	0.446	0.1	4.7904e-31	Naïve	LOC106997133
3.4072e-35	1.03085	0.417	0.087	1.20002e-30	Naïve	BMPR1B
6.86055e-35	0.98115	0.752	0.392	2.41629e-30	Naïve	LOC696998
1.14124e-34	0.569209	0.983	0.945	4.01943e-30	Naïve	RPL7A
1.55001e-34	0.627463	0.967	0.925	5.45915e-30	Naïve	TOMM7
5.5076e-34	0.710375	0.942	0.878	1.93978e-29	Naïve	RPL7
1.26667e-33	0.612182	0.975	0.938	4.46122e-29	Naïve	RPL17
1.58643e-33	0.882672	0.938	0.782	5.58742e-29	Naïve	CCND3
2.53189e-33	0.830575	0.979	0.821	8.91731e-29	Naïve	GIMAP7
3.54083e-33	0.577986	0.992	0.956	1.24708e-28	Naïve	RPS9
6.15079e-33	0.502632	0.988	0.957	2.16631e-28	Naïve	UBA52
9.34684e-33	0.725378	0.401	0.085	3.29196e-28	Naïve	GPR155
1.4575e-32	0.965609	0.88	0.626	5.13331e-28	Naïve	PCED1B
3.39187e-32	0.701039	0.355	0.063	1.19462e-27	Naïve	PRAG1
1.35505e-31	0.907492	0.669	0.303	4.7725e-27	Naïve	DGKA
2.22457e-31	0.911256	0.57	0.219	7.83495e-27	Naïve	RPIA
2.42972e-31	0.769988	0.426	0.105	8.55746e-27	Naïve	CTSH
8.50463e-31	0.818624	0.723	0.358	2.99533e-26	Naïve	IPCEF1
3.58851e-28	0.904701	0.69	0.314	1.26387e-23	Naïve	TXK
4.11808e-28	0.605027	0.983	0.953	1.45039e-23	Naïve	RPS29
5.69916e-28	0.876128	0.459	0.139	2.00724e-23	Naïve	NR3C2
6.44442e-28	0.852235	0.901	0.692	2.26972e-23	Naïve	RAPGEF6
7.8328e-28	0.681693	0.475	0.144	2.75871e-23	Naïve	IL6R
9.57499e-28	0.725671	0.95	0.859	3.37231e-23	Naïve	IKZF1
1.36599e-27	0.65009	0.959	0.896	4.81103e-23	Naïve	RPL26
1.76821e-27	0.726827	0.595	0.217	6.22763e-23	Naïve	DNM3
2.0393e-27	0.662234	0.942	0.826	7.18241e-23	Naïve	EIF3E
2.33702e-27	0.758651	0.388	0.093	8.23097e-23	Naïve	EVA1C
6.11431e-27	0.705541	0.975	0.863	2.15346e-22	Naïve	BCL11B
1.15421e-26	0.942673	0.517	0.203	4.06511e-22	Naïve	ATF7IP2
1.16569e-26	0.773689	0.826	0.439	4.10556e-22	Naïve	AKT3
1.40026e-26	0.751096	0.835	0.575	4.93173e-22	Naïve	LOC114679035
1.81341e-26	0.850179	0.612	0.284	6.38684e-22	Naïve	SLC30A7
2.58789e-26	0.380222	0.992	0.966	9.11456e-22	Naïve	RPS19
3.47787e-26	0.793457	0.876	0.688	1.2249e-21	Naïve	NSA2
5.67644e-26	0.62669	0.955	0.895	1.99924e-21	Naïve	NME2
6.66556e-26	0.734775	0.343	0.077	2.34761e-21	Naïve	TANC1
8.36357e-26	0.600995	0.384	0.105	2.94565e-21	Naïve	ACTN1
8.58401e-26	0.760627	0.446	0.141	3.02329e-21	Naïve	PATJ
8.87692e-26	0.685216	0.401	0.113	3.12645e-21	Naïve	PITPNM2
9.29703e-26	0.732383	0.343	0.078	3.27441e-21	Naïve	TMEM117
1.01145e-25	0.698302	0.847	0.486	3.56233e-21	Naïve	PAG1
2.77548e-25	0.55467	0.579	0.213	9.77524e-21	Naïve	NRIP1
2.91318e-25	0.686324	0.492	0.178	1.02602e-20	Naïve	SPTBN1
3.2287e-25	0.976589	0.504	0.191	1.13715e-20	Naïve	CHMP7
5.1627e-25	1	0.781	0.546	1.8183e-20	Naïve	LOC114674318
6.27896e-25	0.508687	0.975	0.939	2.21145e-20	Naïve	RPL23A
7.30903e-25	0.569252	0.963	0.904	2.57424e-20	Naïve	RPL4
9.21859e-25	0.699703	0.905	0.694	3.24679e-20	Naïve	SEPTIN6
1.82177e-24	0.538271	0.302	0.061	6.41628e-20	Naïve	HMGN3
2.46022e-24	0.759585	0.492	0.18	8.66489e-20	Naïve	PCNX2
3.48405e-24	0.578995	0.967	0.934	1.22708e-19	Naïve	RPL35
5.5979e-24	0.564305	0.963	0.884	1.97158e-19	Naïve	EIF3K
8.78311e-24	0.603769	0.397	0.12	3.09341e-19	Naïve	TMEM63A
4.79893e-23	0.69524	0.471	0.174	1.69018e-18	Naïve	TNFSF8
5.69537e-23	0.566622	0.355	0.094	2.00591e-18	Naïve	RALGPS2
1.06704e-22	0.904922	0.682	0.373	3.75813e-18	Naïve	ST6GAL1
2.92988e-22	0.677596	0.566	0.268	1.0319e-17	Naïve	PIK3IP1
6.10767e-22	0.712319	0.76	0.466	2.15112e-17	Naïve	RPL22L1
6.73048e-22	0.682219	0.74	0.459	2.37048e-17	Naïve	TMEM243
6.97705e-22	0.70287	0.884	0.707	2.45732e-17	Naïve	DOCK10
1.07123e-21	0.606404	0.351	0.108	3.77286e-17	Naïve	PRDX2
1.79058e-21	0.435483	0.971	0.956	6.30641e-17	Naïve	RPS11
2.30716e-20	0.532826	0.302	0.077	8.12581e-16	Naïve	PPFIBP2
3.40367e-20	0.726665	0.256	0.054	1.19877e-15	Naïve	TTC28
6.74137e-20	0.547566	0.347	0.102	2.37431e-15	Naïve	ZFYVE9
1.28039e-19	0.474909	0.971	0.923	4.50955e-15	Naïve	ITM2B
1.59935e-19	0.638373	0.612	0.342	5.6329e-15	Naïve	DYRK2
2.0183e-19	0.618406	0.909	0.808	7.10844e-15	Naïve	HNRNPA1
3.32359e-19	0.540741	0.413	0.162	1.17057e-14	Naïve	LOC100430028
3.48633e-19	0.492074	0.942	0.917	1.22789e-14	Naïve	SRSF5
3.50471e-19	0.520912	0.331	0.097	1.23436e-14	Naïve	KLF7
7.80433e-19	0.711524	0.814	0.642	2.74869e-14	Naïve	LOC704147
1.33353e-18	0.58932	0.355	0.12	4.69669e-14	Naïve	SLC22A23
1.43046e-18	0.489748	0.306	0.083	5.03807e-14	Naïve	SNX9
1.89998e-18	0.506796	0.988	0.81	6.69173e-14	Naïve	LOC114673210
2.82411e-18	0.577101	0.715	0.441	9.9465e-14	Naïve	MCUB
4.01136e-18	0.605722	0.508	0.234	1.4128e-13	Naïve	S1PR1
4.63018e-18	0.595795	0.459	0.192	1.63075e-13	Naïve	LOC106993394
8.94631e-18	0.503483	0.971	0.939	3.15089e-13	Naïve	EEF1B2
1.08179e-17	0.596537	0.752	0.513	3.81007e-13	Naïve	GYPC
1.37454e-17	1.41129	0.533	0.331	4.84114e-13	Naïve	LOC114672793
1.39547e-17	0.450462	0.731	0.398	4.91485e-13	Naïve	SPOCK2
1.62962e-17	0.586903	0.897	0.747	5.73953e-13	Naïve	CCNI
1.92169e-17	0.69608	0.632	0.371	6.7682e-13	Naïve	LOC100499503
2.21537e-17	0.763015	0.727	0.513	7.80252e-13	Naïve	AFF1
2.49935e-17	0.408775	0.252	0.062	8.80272e-13	Naïve	BEX4
2.60039e-17	0.663852	0.504	0.223	9.15856e-13	Naïve	FAM117B
3.90451e-17	0.558173	0.938	0.701	1.37517e-12	Naïve	IL7R
4.00448e-17	0.619459	0.88	0.744	1.41038e-12	Naïve	EPB41
5.55506e-17	0.47925	0.302	0.09	1.95649e-12	Naïve	MYC
6.26053e-17	0.547505	0.769	0.563	2.20496e-12	Naïve	MAP4K4
1.08752e-16	0.730917	0.347	0.121	3.83026e-12	Naïve	ADAMTS6
1.25055e-16	0.797816	0.364	0.137	4.40443e-12	Naïve	SBF2
1.28205e-16	0.660135	0.628	0.376	4.51538e-12	Naïve	ARHGEF7
1.32029e-16	0.394353	0.967	0.934	4.65006e-12	Naïve	PFDN5
1.41356e-16	0.631222	0.562	0.322	4.97857e-12	Naïve	LOC719242
1.49317e-16	0.424511	0.983	0.977	5.25896e-12	Naïve	MBNL1
2.51101e-16	0.658438	0.851	0.707	8.84377e-12	Naïve	TNFAIP8
2.57109e-16	0.484164	0.587	0.328	9.05539e-12	Naïve	HPCAL1
4.4062e-16	0.552117	0.835	0.711	1.55186e-11	Naïve	RSL24D1
4.75861e-16	0.531445	0.835	0.642	1.67598e-11	Naïve	LIMD2
5.60163e-16	0.556589	0.69	0.45	1.97289e-11	Naïve	TMEM123
1.38688e-15	0.521242	0.847	0.721	4.88457e-11	Naïve	NOP53
1.57782e-15	0.537206	0.917	0.813	5.55709e-11	Naïve	ARID1B
1.60711e-15	0.453281	0.955	0.914	5.66024e-11	Naïve	RPS17
2.01662e-15	0.599819	0.558	0.307	7.10253e-11	Naïve	ANKH
5.33628e-15	0.469137	0.926	0.795	1.87944e-10	Naïve	BTF3
6.29667e-15	0.506165	0.665	0.444	2.21769e-10	Naïve	CYB5A
6.92374e-15	0.575512	0.479	0.248	2.43854e-10	Naïve	LOC114678346
8.34476e-15	0.511791	0.921	0.789	2.93903e-10	Naïve	TXNIP
9.15921e-15	0.514647	0.545	0.307	3.22587e-10	Naïve	PDCD4
9.39696e-15	0.507115	0.897	0.806	3.30961e-10	Naïve	UBE2D2
1.16134e-14	0.482057	0.335	0.131	4.09023e-10	Naïve	TMEM204
1.78644e-14	0.595122	0.698	0.419	6.29185e-10	Naïve	IMMP2L
2.55927e-14	0.596664	0.645	0.406	9.01376e-10	Naïve	LOC114674016
3.43727e-14	0.484569	0.269	0.087	1.21061e-09	Naïve	LOC114676947
3.972e-14	0.510668	0.459	0.237	1.39894e-09	Naïve	FUOM
4.12285e-14	0.508131	0.421	0.206	1.45207e-09	Naïve	GRAP
4.6557e-14	0.604272	0.707	0.458	1.63974e-09	Naïve	CCDC91
5.0145e-14	0.372855	0.335	0.122	1.76611e-09	Naïve	APP
7.123e-14	0.540443	0.698	0.517	2.50872e-09	Naïve	ATM
1.54072e-13	0.602103	0.661	0.467	5.42642e-09	Naïve	SLC12A6
1.57967e-13	0.61805	0.744	0.534	5.56359e-09	Naïve	ARHGEF18
1.68755e-13	0.547873	0.843	0.701	5.94356e-09	Naïve	ATP10A
1.89179e-13	0.482204	0.43	0.213	6.66288e-09	Naïve	SUSD3
2.17194e-13	0.564187	0.488	0.253	7.64958e-09	Naïve	ERC1
2.19943e-13	0.666088	0.773	0.585	7.7464e-09	Naïve	MLLT3
2.73131e-13	0.50202	0.727	0.526	9.61968e-09	Naïve	RPS4Y2
2.94237e-13	0.419278	0.814	0.638	1.0363e-08	Naïve	DIP2B
3.16229e-13	0.533276	0.397	0.183	1.11376e-08	Naïve	KIAA0355
3.49679e-13	0.505339	0.326	0.132	1.23157e-08	Naïve	LOC702760
3.5444e-13	0.549334	0.607	0.381	1.24834e-08	Naïve	LOC114677645
4.09697e-13	0.478695	0.917	0.825	1.44295e-08	Naïve	ATP5MC2
5.65923e-13	0.502508	0.847	0.719	1.99318e-08	Naïve	LOC716530
6.89152e-13	0.390588	0.326	0.135	2.42719e-08	Naïve	FCGRT-1
7.6221e-13	0.488637	0.384	0.174	2.6845e-08	Naïve	GLCE
9.39174e-13	0.485081	0.905	0.721	3.30777e-08	Naïve	BMT2
1.35338e-12	0.544761	0.537	0.336	4.76661e-08	Naïve	CRLF3
1.57478e-12	0.570607	0.843	0.697	5.54637e-08	Naïve	LOC697687
1.63731e-12	0.488323	0.731	0.557	5.76659e-08	Naïve	PPP1CC
1.66919e-12	0.502906	0.872	0.763	5.87889e-08	Naïve	TOMM20
1.84566e-12	1.091	0.517	0.367	6.50041e-08	Naïve	LOC693820
2.04112e-12	0.551892	0.335	0.14	7.18881e-08	Naïve	TIAM1
2.61451e-12	0.653765	0.537	0.345	9.20829e-08	Naïve	OTUD5
3.42615e-12	0.47655	0.731	0.583	1.20669e-07	Naïve	LOC705400
3.63117e-12	0.43648	0.682	0.44	1.2789e-07	Naïve	ZEB1
3.97369e-12	0.539022	0.583	0.382	1.39953e-07	Naïve	SNX29
4.12163e-12	0.422765	0.979	0.934	1.45164e-07	Naïve	RPL36
5.46396e-12	0.367832	0.293	0.113	1.92441e-07	Naïve	STRBP
5.93591e-12	0.458886	0.847	0.729	2.09063e-07	Naïve	KLF13
6.85685e-12	0.428947	0.277	0.109	2.41498e-07	Naïve	LDLRAP1
7.67376e-12	0.454107	0.798	0.624	2.7027e-07	Naïve	TLK1
8.43983e-12	0.57027	0.545	0.343	2.97251e-07	Naïve	HACE1
8.92009e-12	0.421396	0.43	0.223	3.14166e-07	Naïve	DENND2D
9.956e-12	0.502676	0.781	0.622	3.5065e-07	Naïve	GLG1
1.07848e-11	0.526545	0.355	0.164	3.7984e-07	Naïve	LOC702071
1.20954e-11	0.391903	0.293	0.12	4.25999e-07	Naïve	LOC114676998
1.38731e-11	0.49578	0.686	0.487	4.88611e-07	Naïve	LOC106998573
1.55168e-11	0.37064	0.252	0.087	5.465e-07	Naïve	LOC106997195
1.60159e-11	0.593123	0.55	0.381	5.6408e-07	Naïve	LOC693947
1.66421e-11	0.508477	0.723	0.564	5.86134e-07	Naïve	CHD3
2.02442e-11	0.620288	0.731	0.567	7.13001e-07	Naïve	DTNBP1
2.12656e-11	0.507493	0.748	0.595	7.48975e-07	Naïve	KRAS
2.66646e-11	0.31634	0.975	0.942	9.39128e-07	Naïve	EEF1D
2.76909e-11	0.47487	0.541	0.335	9.75272e-07	Naïve	DDT
3.25499e-11	0.481503	0.368	0.183	1.14641e-06	Naïve	CHD7
3.32029e-11	0.486567	0.62	0.423	1.1694e-06	Naïve	PIK3CD
3.82926e-11	0.435588	0.868	0.77	1.34866e-06	Naïve	EIF3H
4.54164e-11	0.405353	0.421	0.217	1.59956e-06	Naïve	INPP5A
5.47916e-11	0.538001	0.256	0.096	1.92976e-06	Naïve	PRKN
5.93598e-11	0.43938	0.793	0.615	2.09065e-06	Naïve	TRAF3IP3
6.31625e-11	0.754809	0.26	0.094	2.22458e-06	Naïve	TSHZ2
6.82599e-11	0.566171	0.364	0.178	2.40411e-06	Naïve	SCMH1
7.49446e-11	0.592296	0.595	0.432	2.63955e-06	Naïve	EEA1
7.75202e-11	0.323959	0.731	0.486	2.73026e-06	Naïve	COTL1
1.21876e-10	0.414311	0.364	0.18	4.29249e-06	Naïve	TRIM44
1.27701e-10	0.475475	0.62	0.428	4.49764e-06	Naïve	LOC114679371
1.37634e-10	0.345554	0.438	0.225	4.84747e-06	Naïve	BIRC3
1.51316e-10	0.480317	0.715	0.575	5.32937e-06	Naïve	RBIS
1.53792e-10	0.402495	0.281	0.114	5.41655e-06	Naïve	IFNGR2
1.79098e-10	0.478431	0.566	0.378	6.30782e-06	Naïve	UBALD2
1.87873e-10	0.433118	0.682	0.509	6.6169e-06	Naïve	SEPTIN1
1.89261e-10	0.424603	0.372	0.187	6.66577e-06	Naïve	MRTFB
1.95679e-10	0.499566	0.306	0.136	6.8918e-06	Naïve	AIG1
3.38176e-10	0.686312	0.541	0.357	1.19106e-05	Naïve	LOC705327
4.39211e-10	0.434837	0.409	0.23	1.5469e-05	Naïve	LOC699779
4.39888e-10	0.418057	0.38	0.192	1.54928e-05	Naïve	DNMT3A
4.44139e-10	0.465744	0.463	0.285	1.56426e-05	Naïve	GTF2E2
4.7563e-10	0.462505	0.674	0.55	1.67517e-05	Naïve	EIF3M
6.21978e-10	0.575105	0.769	0.622	2.19061e-05	Naïve	SSBP2
7.90792e-10	0.390624	0.43	0.25	2.78517e-05	Naïve	AKAP17A
1.15405e-09	0.489304	0.574	0.415	4.06458e-05	Naïve	RELL1
1.26789e-09	0.357167	0.256	0.105	4.4655e-05	Naïve	CLIP4
1.32634e-09	0.437834	0.727	0.594	4.67138e-05	Naïve	EIF4B
1.36319e-09	0.340327	0.632	0.431	4.80117e-05	Naïve	AOPEP
1.54532e-09	0.414393	0.727	0.565	5.44262e-05	Naïve	CYLD
1.66452e-09	0.42706	0.657	0.48	5.86244e-05	Naïve	SIPA1L1
1.94894e-09	0.470814	0.645	0.503	6.86416e-05	Naïve	PPP1R2
2.09213e-09	0.445022	0.81	0.693	7.36849e-05	Naïve	STK38
2.16197e-09	0.344216	0.897	0.822	7.61447e-05	Naïve	PNRC1
2.4119e-09	0.462895	0.731	0.595	8.49473e-05	Naïve	SP110
2.53517e-09	0.373997	0.351	0.179	8.92888e-05	Naïve	HIPK2
3.57727e-09	0.252179	1	0.989	0.000125991	Naïve	KEG06-p07
4.45862e-09	0.346622	0.917	0.873	0.000157033	Naïve	LOC106998836
4.84935e-09	0.405511	0.876	0.79	0.000170794	Naïve	PNISR
5.04072e-09	0.580692	0.459	0.31	0.000177534	Naïve	KLHL5
5.28702e-09	0.336445	0.463	0.295	0.000186209	Naïve	LOC710293
6.68238e-09	0.360991	0.665	0.507	0.000235354	Naïve	VAMP8
7.71544e-09	0.461077	0.628	0.436	0.000271738	Naïve	MAN2A1
8.36382e-09	0.352073	0.748	0.596	0.000294574	Naïve	RHOH
8.54147e-09	0.362692	0.843	0.748	0.000300831	Naïve	NPM1
9.86349e-09	0.310261	0.384	0.205	0.000347392	Naïve	ZNF331
1.18129e-08	0.390458	0.764	0.664	0.000416051	Naïve	SEC62
1.40694e-08	0.393813	0.752	0.658	0.000495525	Naïve	ERBIN
1.47633e-08	0.386633	0.595	0.431	0.000519962	Naïve	FARS2
1.53359e-08	0.341611	0.281	0.137	0.000540131	Naïve	LOC106993990
1.5864e-08	0.398217	0.525	0.382	0.00055873	Naïve	THYN1
1.63146e-08	0.375008	0.335	0.174	0.0005746	Naïve	NFATC1
1.64207e-08	0.398122	0.86	0.716	0.000578336	Naïve	GPSM3
1.64849e-08	0.405291	0.355	0.191	0.000580597	Naïve	LDLRAD4
1.77902e-08	0.34326	0.285	0.135	0.000626572	Naïve	APBA2
1.86553e-08	0.533344	0.802	0.709	0.000657038	Naïve	CAMK2D
1.92e-08	0.41304	0.529	0.388	0.000676223	Naïve	LOC714598
2.0172e-08	0.345278	0.785	0.647	0.000710457	Naïve	TRMT112
2.21374e-08	0.517653	0.591	0.45	0.000779678	Naïve	NRROS
2.56717e-08	0.395983	0.921	0.837	0.000904159	Naïve	KLF2
3.03705e-08	0.325953	0.744	0.567	0.00106965	Naïve	RBPMS
3.05382e-08	0.411892	0.748	0.614	0.00107556	Naïve	YPEL3
4.25885e-08	0.343634	0.81	0.688	0.00149997	Naïve	RPL39
4.76754e-08	0.322169	0.86	0.75	0.00167913	Naïve	TRA2B
4.80414e-08	0.379394	0.347	0.188	0.00169202	Naïve	RNF138
4.82145e-08	0.387637	0.764	0.63	0.00169812	Naïve	UTY
5.12625e-08	0.349532	0.492	0.342	0.00180547	Naïve	LOC698942
5.12894e-08	0.394644	0.719	0.606	0.00180641	Naïve	C3H7orf50
5.13263e-08	0.404252	0.326	0.175	0.00180771	Naïve	KANSL1L
5.32947e-08	0.376607	0.661	0.541	0.00187704	Naïve	PGK1
5.56317e-08	0.600677	0.748	0.622	0.00195935	Naïve	JUNB
6.28458e-08	0.401241	0.264	0.121	0.00221343	Naïve	SORBS1
6.52483e-08	0.361517	0.884	0.822	0.00229804	Naïve	CYTH1
7.20389e-08	0.341396	0.905	0.801	0.00253721	Naïve	EIF4A2
7.48339e-08	0.400621	0.314	0.166	0.00263565	Naïve	LOC114671073
8.56609e-08	0.333675	0.488	0.322	0.00301698	Naïve	MRPS6
9.31719e-08	0.394921	0.397	0.238	0.00328151	Naïve	FBXO25
1.00789e-07	0.344105	0.376	0.231	0.00354978	Naïve	LDHB
1.02787e-07	0.437159	0.504	0.35	0.00362018	Naïve	LOC114677679
1.34711e-07	0.319678	0.917	0.856	0.00474454	Naïve	CD247
1.45567e-07	0.403401	0.335	0.201	0.00512686	Naïve	HDAC2
1.74553e-07	0.304928	0.938	0.894	0.00614777	Naïve	RPL36AL
1.80339e-07	0.291559	0.252	0.117	0.00635156	Naïve	TRIB2
1.99813e-07	0.394205	0.45	0.307	0.00703741	Naïve	LOC701369
2.29307e-07	0.391791	0.442	0.301	0.0080762	Naïve	LOC717246
2.30267e-07	0.342349	0.665	0.526	0.00811002	Naïve	ST13
2.30794e-07	0.422429	0.529	0.378	0.00812856	Naïve	ME2
2.39017e-07	0.433693	0.496	0.351	0.00841818	Naïve	NOSIP
2.52749e-07	0.285844	0.558	0.396	0.00890181	Naïve	LOC719811
2.96162e-07	0.414422	0.479	0.314	0.0104308	Naïve	PLEKHG1
3.09665e-07	0.283013	0.971	0.915	0.0109064	Naïve	LOC703365
3.32717e-07	0.330676	0.806	0.732	0.0117183	Naïve	UBAC2
3.40299e-07	0.443279	0.293	0.148	0.0119853	Naïve	ADAMTS17
3.74403e-07	0.338827	0.434	0.284	0.0131865	Naïve	MGAT4A
3.75659e-07	0.30406	0.26	0.132	0.0132307	Naïve	CDIP1
3.98879e-07	0.301311	0.76	0.643	0.0140485	Naïve	RNF145
4.19734e-07	0.305151	0.975	0.79	0.014783	Naïve	LOC114673461
4.39249e-07	0.342939	0.401	0.248	0.0154703	Naïve	LPAR6
4.42409e-07	0.289896	0.289	0.152	0.0155816	Naïve	FAM102A
4.56926e-07	0.371621	0.649	0.524	0.0160929	Naïve	BRWD1
5.01105e-07	0.327957	0.302	0.167	0.0176489	Naïve	USP20
5.20104e-07	0.348396	0.318	0.18	0.0183181	Naïve	ADSL
5.42215e-07	0.364826	0.326	0.183	0.0190968	Naïve	TNFRSF25
6.40981e-07	0.364228	0.64	0.511	0.0225754	Naïve	CUTA
6.46141e-07	0.360166	0.281	0.153	0.0227571	Naïve	LOC107000845
6.86723e-07	0.319346	0.537	0.38	0.0241864	Naïve	ECHDC1
7.04179e-07	0.312866	0.913	0.883	0.0248012	Naïve	SSH2
7.65588e-07	0.353345	0.669	0.525	0.026964	Naïve	RBMS1
7.90927e-07	0.336302	0.372	0.226	0.0278564	Naïve	KLHL6
8.46552e-07	0.26106	0.946	0.856	0.0298155	Naïve	SMDT1
8.89145e-07	0.355115	0.855	0.787	0.0313157	Naïve	STK4
8.96183e-07	0.359336	0.421	0.28	0.0315636	Naïve	ANKZF1
1.00993e-06	0.337157	0.421	0.287	0.0355697	Naïve	BTF3L4
1.09688e-06	0.307438	0.711	0.567	0.0386322	Naïve	LOC712543
1.1132e-06	0.333819	0.36	0.217	0.0392069	Naïve	LOC693848
1.30876e-06	0.376211	0.682	0.545	0.0460946	Naïve	MAP3K1
1.51374e-06	0.282293	0.934	0.869	0.0533139	Naïve	TNRC6B
1.66795e-06	0.339184	0.289	0.153	0.0587453	Naïve	FBXW8
1.73925e-06	0.319141	0.293	0.17	0.0612562	Naïve	MMD
1.84615e-06	0.302419	0.43	0.293	0.0650214	Naïve	GPR18
1.85361e-06	0.332611	0.521	0.378	0.0652842	Naïve	MDFIC
2.22485e-06	0.298478	0.736	0.608	0.0783592	Naïve	ITPR2
2.2408e-06	0.357171	0.343	0.21	0.0789208	Naïve	SHLD1
3.58497e-06	0.346658	0.537	0.402	0.126263	Naïve	WWP1
3.58794e-06	0.347031	0.698	0.612	0.126367	Naïve	CIRBP
3.59931e-06	0.292596	0.496	0.362	0.126768	Naïve	ATXN7L3B
4.42692e-06	0.346819	0.322	0.197	0.155916	Naïve	CYB5D2
4.50353e-06	0.341662	0.665	0.521	0.158614	Naïve	HERC3
4.55456e-06	0.341364	0.343	0.222	0.160411	Naïve	LOC708815
4.55464e-06	0.325671	0.438	0.314	0.160415	Naïve	TFAM
4.67296e-06	0.291154	0.26	0.145	0.164582	Naïve	CTDSP2
4.89666e-06	0.316213	0.351	0.225	0.17246	Naïve	ADI1
5.20393e-06	0.37899	0.74	0.615	0.183282	Naïve	GIMAP1
5.33366e-06	0.347864	0.417	0.288	0.187852	Naïve	ICAM2
5.43736e-06	0.267669	0.277	0.156	0.191504	Naïve	CRTC3
5.67921e-06	0.341684	0.442	0.301	0.200022	Naïve	LOC695533
5.78684e-06	0.270221	0.322	0.194	0.203812	Naïve	LOC100427254
6.21522e-06	0.327466	0.351	0.227	0.2189	Naïve	RPL31
6.48564e-06	0.2906	0.252	0.136	0.228424	Naïve	DPEP2
6.83722e-06	0.296686	0.397	0.26	0.240807	Naïve	SFMBT1
7.64678e-06	0.311964	0.252	0.136	0.26932	Naïve	ENO2
8.12338e-06	0.253119	0.405	0.269	0.286106	Naïve	RPS27A
8.36351e-06	0.325233	0.417	0.289	0.294563	Naïve	FAM200B
8.41391e-06	0.322196	0.273	0.156	0.296338	Naïve	LOC698297
8.85269e-06	0.318732	0.764	0.708	0.311792	Naïve	LOC107000401
9.70285e-06	0.33625	0.624	0.528	0.341734	Naïve	EIF3G
9.98177e-06	0.271782	0.289	0.163	0.351558	Naïve	LOC114675993
1.25471e-05	0.392029	0.512	0.39	0.441909	Naïve	SCFD2
1.41484e-05	0.275203	0.603	0.487	0.498308	Naïve	STK24
1.44856e-05	0.312338	0.521	0.401	0.510184	Naïve	C1QBP
1.74921e-05	0.425473	0.409	0.283	0.616073	Naïve	PLEKHM3
1.91319e-05	0.379514	0.583	0.486	0.673827	Naïve	GTF2I
2.04843e-05	0.273957	0.347	0.226	0.721457	Naïve	MSL3
2.62072e-05	0.330771	0.401	0.273	0.923018	Naïve	RFTN1
2.68832e-05	0.351149	0.521	0.394	0.946827	Naïve	SPATA5
3.031e-05	0.359174	0.393	0.273	1	Naïve	FAM162A
3.13859e-05	0.26741	0.252	0.145	1	Naïve	SETD1B
3.17539e-05	0.301075	0.587	0.463	1	Naïve	PRKACB
4.1295e-05	0.305878	0.769	0.678	1	Naïve	MACF1
4.15333e-05	0.256146	0.471	0.331	1	Naïve	LOC106995407
4.18756e-05	0.328817	0.558	0.458	1	Naïve	ZMYND8
4.3041e-05	0.299293	0.322	0.201	1	Naïve	SKIL
4.41625e-05	0.269073	0.384	0.262	1	Naïve	LOC106997006
4.75606e-05	0.340236	0.36	0.242	1	Naïve	HELQ
5.29051e-05	0.35735	0.397	0.3	1	Naïve	NSMCE1
5.31056e-05	0.352263	0.343	0.229	1	Naïve	LOC711798
5.85289e-05	0.266788	0.269	0.164	1	Naïve	NT5C3B
6.19853e-05	0.302351	0.831	0.728	1	Naïve	TCF12
7.6161e-05	0.283778	0.591	0.521	1	Naïve	ARHGAP45
7.70563e-05	0.272742	0.657	0.537	1	Naïve	MALT1
9.44451e-05	0.255436	0.289	0.186	1	Naïve	CFP
9.50672e-05	0.276028	0.281	0.18	1	Naïve	ZNF160
9.72799e-05	0.304042	0.467	0.363	1	Naïve	DPP4
9.82262e-05	0.258496	0.496	0.373	1	Naïve	MXI1
0.000101261	0.303112	0.649	0.55	1	Naïve	CREB1
0.000104938	0.284355	0.384	0.279	1	Naïve	MTIF3
0.000105718	0.281438	0.793	0.724	1	Naïve	SSB
0.000107748	0.288671	0.417	0.318	1	Naïve	TMEM87B
0.000109717	0.269237	0.74	0.643	1	Naïve	PLAAT4
0.000110264	0.276723	0.277	0.174	1	Naïve	TARSL2
0.000135798	0.295544	0.64	0.572	1	Naïve	SF1
0.000143266	1.07511	0.38	0.351	1	Naïve	LOC707085
0.000143752	0.266855	0.38	0.268	1	Naïve	MIGA1
0.000146076	0.318052	0.719	0.633	1	Naïve	SENP7
0.000152816	0.261041	0.616	0.525	1	Naïve	CASP12
0.000159397	0.286893	0.455	0.347	1	Naïve	LOC718556
0.000159728	0.253085	0.405	0.31	1	Naïve	SYPL1
0.000186357	0.344627	0.306	0.209	1	Naïve	NUP50
0.000199571	0.279542	0.335	0.227	1	Naïve	HIF1A
0.000206376	0.258756	0.269	0.174	1	Naïve	STYX
0.000213182	0.345622	0.368	0.265	1	Naïve	TMEM238
0.000219963	0.331383	0.31	0.206	1	Naïve	CTDP1
0.000237337	0.272098	0.628	0.541	1	Naïve	LOC700087
0.000242727	0.288528	0.64	0.577	1	Naïve	KTN1
0.000329506	0.260517	0.343	0.249	1	Naïve	LOC704394
0.000334974	0.291436	0.455	0.357	1	Naïve	TMC8
0.000341307	0.339454	0.376	0.269	1	Naïve	AHCYL2
0.000407917	0.276363	0.442	0.35	1	Naïve	ZNF107
0.000415587	0.264289	0.426	0.33	1	Naïve	LOC699375
0.000425571	0.34031	0.36	0.261	1	Naïve	CYSLTR1
0.00044025	0.277893	0.657	0.549	1	Naïve	RCSD1
0.00052128	0.27521	0.264	0.178	1	Naïve	KEG06-p03
0.000561025	0.253241	0.574	0.51	1	Naïve	POLR1D
0.000564139	0.319328	0.537	0.429	1	Naïve	EXOC6
0.000588429	0.275567	0.888	0.853	1	Naïve	TBC1D5
0.000608703	0.262736	0.318	0.23	1	Naïve	XPA
0.000873667	0.274797	0.281	0.199	1	Naïve	MFSD10
0.000983129	0.269417	0.401	0.316	1	Naïve	CCDC59
0.00138602	0.254769	0.322	0.245	1	Naïve	CTSZ
0.00138784	0.276472	0.252	0.178	1	Naïve	LIMK2
0.00194519	0.281097	0.62	0.561	1	Naïve	RASSF3
0.00196788	0.298235	0.769	0.696	1	Naïve	BCL2
0.00208453	0.258864	0.57	0.507	1	Naïve	DDX18
0.00226644	0.353028	0.38	0.3	1	Naïve	NOL8
0.00246861	0.279179	0.31	0.222	1	Naïve	LOC106997709
0.00293848	0.267012	0.426	0.347	1	Naïve	LOC716637
0.00517127	0.278561	0.322	0.248	1	Naïve	ABCG2
0.00667821	0.317088	0.512	0.444	1	Naïve	STMN3
0.00668536	0.254806	0.525	0.459	1	Naïve	IGBP1
0.00681102	0.250851	0.475	0.396	1	Naïve	ATE1

## Sheet: Proliferating
p_val	avg_log2FC	pct.1	pct.2	p_val_adj	cluster	gene
6.59901e-72	3.67788	0.984	0.413	2.32417e-67	Proliferating	STMN1
1.9842e-28	3.03603	0.77	0.353	6.98837e-24	Proliferating	LOC114677671
4.75904e-56	2.94002	0.967	0.531	1.67613e-51	Proliferating	TUBA1B
1.02965e-65	2.62488	0.984	0.463	3.62643e-61	Proliferating	HMGB2
1.38149e-47	2.59185	0.91	0.468	4.86562e-43	Proliferating	TUBB
3.59052e-26	2.34427	0.541	0.166	1.26458e-21	Proliferating	HIST1H1D
1.57048e-98	2.12478	0.779	0.06	5.53125e-94	Proliferating	MKI67
3.83255e-145	2.10344	0.795	0.015	1.34982e-140	Proliferating	DIAPH3
1.80298e-146	1.99665	0.803	0.016	6.35009e-142	Proliferating	PCLAF
6.80175e-76	1.97108	0.893	0.187	2.39557e-71	Proliferating	PCNA
1.14601e-67	1.89073	0.984	0.336	4.03624e-63	Proliferating	LOC106996415
1.42355e-98	1.70994	0.607	0.02	5.01376e-94	Proliferating	TOP2A
2.12928e-115	1.69895	0.795	0.043	7.49931e-111	Proliferating	CENPP
7.07077e-101	1.67318	0.615	0.02	2.49032e-96	Proliferating	RRM2
1.52501e-68	1.66339	0.836	0.165	5.3711e-64	Proliferating	ATAD2
1.8104e-42	1.66309	0.975	0.708	6.37623e-38	Proliferating	H2AFZ
1.10529e-68	1.61541	0.77	0.125	3.89284e-64	Proliferating	CKS2
1.3873e-72	1.56737	0.828	0.141	4.88609e-68	Proliferating	CKS1B
1.21385e-49	1.56664	0.951	0.387	4.27519e-45	Proliferating	C11H12orf75
2.62854e-42	1.51266	0.885	0.489	9.25773e-38	Proliferating	RPA3
2.91914e-105	1.50916	0.615	0.015	1.02812e-100	Proliferating	NUSAP1
1.84839e-80	1.5007	0.672	0.058	6.51001e-76	Proliferating	BRCA1
1.45721e-115	1.49233	0.721	0.027	5.13229e-111	Proliferating	CDK1
2.37106e-87	1.47014	0.803	0.094	8.35088e-83	Proliferating	MCM7
3.11453e-68	1.46969	0.82	0.153	1.09694e-63	Proliferating	LMNB1
2.83748e-93	1.46913	0.828	0.088	9.9936e-89	Proliferating	ITGB3BP
4.76863e-41	1.46359	0.877	0.322	1.67951e-36	Proliferating	SMC4
2.39821e-58	1.44356	0.697	0.111	8.44651e-54	Proliferating	RFC3
6.38878e-57	1.43991	0.828	0.205	2.25013e-52	Proliferating	HELLS
4.28207e-107	1.43125	0.615	0.014	1.50815e-102	Proliferating	KIF11
1.51617e-11	1.40957	0.59	0.326	5.33995e-07	Proliferating	HIST2H2AC
8.13565e-131	1.37721	0.762	0.021	2.86537e-126	Proliferating	CDT1
1.94075e-69	1.37118	0.811	0.124	6.83531e-65	Proliferating	POLA1
2.32497e-37	1.36444	0.893	0.409	8.18856e-33	Proliferating	DUT
6.56286e-88	1.35964	0.656	0.039	2.31144e-83	Proliferating	BRIP1
1.46637e-91	1.35719	0.746	0.063	5.16456e-87	Proliferating	SMC2
4.7701e-57	1.3307	0.73	0.129	1.68003e-52	Proliferating	H2AFX
1.8859e-131	1.32858	0.672	0.005	6.64213e-127	Proliferating	SPC25
4.09321e-35	1.31819	0.893	0.362	1.44163e-30	Proliferating	RAD51B
1.50124e-26	1.31064	0.754	0.322	5.28737e-22	Proliferating	TUBB4B
7.69221e-113	1.30819	0.77	0.038	2.7092e-108	Proliferating	MCM3
5.44e-25	1.28865	0.828	0.424	1.91597e-20	Proliferating	LAMP3
3.14823e-57	1.28562	0.967	0.275	1.10881e-52	Proliferating	DNMT1
4.01868e-23	1.2847	0.607	0.211	1.41538e-18	Proliferating	LOC696872
3.56273e-93	1.27811	0.689	0.042	1.25479e-88	Proliferating	ZGRF1
3.81237e-33	1.27772	0.984	0.856	1.34272e-28	Proliferating	HMGB1
2.41679e-32	1.26685	0.975	0.801	8.51193e-28	Proliferating	LOC705636
1.71783e-106	1.26578	0.607	0.013	6.05019e-102	Proliferating	KIF15
2.29961e-42	1.26072	0.893	0.34	8.09923e-38	Proliferating	SLBP
7.71174e-43	1.2494	0.811	0.227	2.71607e-38	Proliferating	PTTG1
8.36187e-44	1.24785	0.984	0.616	2.94505e-39	Proliferating	DEK
2.96729e-49	1.2453	0.869	0.251	1.04508e-44	Proliferating	EZH2
1.26571e-109	1.24511	0.623	0.013	4.45782e-105	Proliferating	TYMS
6.88122e-25	1.24074	0.836	0.38	2.42357e-20	Proliferating	WWOX
9.6783e-72	1.24046	0.779	0.11	3.4087e-67	Proliferating	FANCI
1.36099e-66	1.23347	0.664	0.075	4.79341e-62	Proliferating	MMS22L
2.65625e-101	1.2256	0.639	0.022	9.35531e-97	Proliferating	NUF2
6.03012e-106	1.22178	0.607	0.013	2.12381e-101	Proliferating	BRCA2
1.30264e-89	1.21615	0.582	0.023	4.58788e-85	Proliferating	NCAPG
3.20161e-91	1.21496	0.639	0.031	1.12761e-86	Proliferating	CENPU
2.66439e-102	1.21362	0.631	0.02	9.38398e-98	Proliferating	CENPW
1.66766e-84	1.20548	0.492	0.01	5.87351e-80	Proliferating	ASPM
8.64257e-41	1.20477	0.836	0.3	3.04391e-36	Proliferating	SIVA1
4.20214e-34	1.18505	0.549	0.115	1.48e-29	Proliferating	CENPF
7.78512e-20	1.17914	0.607	0.239	2.74192e-15	Proliferating	LOC696005
5.05768e-94	1.17488	0.713	0.048	1.78132e-89	Proliferating	NCAPG2
1.84253e-87	1.17412	0.574	0.023	6.48939e-83	Proliferating	CIT
2.13033e-30	1.1722	0.877	0.344	7.50302e-26	Proliferating	LOC114671905
3.9708e-37	1.16682	0.951	0.696	1.39852e-32	Proliferating	SNRPB
1.8371e-86	1.15303	0.705	0.054	6.47027e-82	Proliferating	CHEK1
1.44009e-32	1.14987	0.926	0.477	5.07199e-28	Proliferating	LOC706608
2.81651e-86	1.14734	0.689	0.051	9.91974e-82	Proliferating	MCM5
1.55702e-33	1.14203	0.984	0.789	5.48383e-29	Proliferating	GPX4
1.66535e-124	1.1357	0.639	0.005	5.86536e-120	Proliferating	RAD51AP1
3.94891e-34	1.13468	0.844	0.315	1.39081e-29	Proliferating	PRIM2
2.84434e-39	1.13284	0.82	0.276	1.00178e-34	Proliferating	CENPX
1.85093e-67	1.12829	0.689	0.087	6.51897e-63	Proliferating	CENPO
9.36871e-100	1.12572	0.623	0.02	3.29966e-95	Proliferating	DTL
9.62245e-36	1.1245	0.877	0.364	3.38903e-31	Proliferating	TMPO
6.66376e-34	1.11978	0.975	0.933	2.34698e-29	Proliferating	PTMA
7.65564e-101	1.11115	0.607	0.017	2.69632e-96	Proliferating	CENPM
2.35753e-75	1.11093	0.549	0.03	8.30324e-71	Proliferating	POLE
1.38366e-30	1.10869	0.984	0.943	4.87326e-26	Proliferating	LOC705671
8.10266e-27	1.10145	0.861	0.418	2.85376e-22	Proliferating	CALM3
2.3048e-97	1.10116	0.672	0.032	8.11749e-93	Proliferating	MCM4
5.48439e-47	1.09335	0.828	0.211	1.9316e-42	Proliferating	NSD2
1.82112e-26	1.06502	0.951	0.481	6.41399e-22	Proliferating	TGFBR3
1.03293e-29	1.06167	0.951	0.736	3.63798e-25	Proliferating	ANP32B
2.16952e-33	1.05553	0.918	0.384	7.64104e-29	Proliferating	LOC106993126
2.95631e-107	1.05471	0.607	0.012	1.04121e-102	Proliferating	CLSPN
3.72617e-51	1.05107	0.672	0.115	1.31236e-46	Proliferating	WDR76
1.77071e-34	1.04972	0.869	0.336	6.23645e-30	Proliferating	FANCC
1.38506e-43	1.04454	0.787	0.219	4.87819e-39	Proliferating	TMSB15B
1.45386e-96	1.03839	0.59	0.017	5.12049e-92	Proliferating	KNTC1
7.17136e-106	1.03395	0.598	0.012	2.52575e-101	Proliferating	E2F1
3.69228e-29	1.03375	0.975	0.759	1.30042e-24	Proliferating	PSMB9
3.78962e-23	1.02445	0.975	0.67	1.3347e-18	Proliferating	S100A4
8.91773e-31	1.02391	0.869	0.422	3.14083e-26	Proliferating	PPDPF
1.65911e-24	1.02173	0.975	0.873	5.84338e-20	Proliferating	CRIP1
5.22081e-32	1.01612	0.967	0.912	1.83877e-27	Proliferating	PFN1
5.25688e-39	1.00767	0.811	0.267	1.85147e-34	Proliferating	LSM2
2.89804e-78	0.993444	0.656	0.051	1.02069e-73	Proliferating	LOC716070
2.79381e-60	0.992415	0.59	0.06	9.83979e-56	Proliferating	WDHD1
4.70264e-28	0.992193	0.705	0.267	1.65627e-23	Proliferating	HMGN2
4.59084e-27	0.985913	0.975	0.893	1.61689e-22	Proliferating	GAPDH
8.56107e-31	0.980661	0.885	0.331	3.01521e-26	Proliferating	APOBEC3G
1.95491e-82	0.979937	0.746	0.068	6.88521e-78	Proliferating	MCM6
9.44776e-52	0.975744	0.59	0.078	3.3275e-47	Proliferating	KIFC1
5.32617e-52	0.969494	0.59	0.076	1.87588e-47	Proliferating	KNL1
3.25676e-56	0.962598	0.369	0.014	1.14703e-51	Proliferating	HIST1H1B
7.2755e-30	0.959009	0.82	0.346	2.56243e-25	Proliferating	RANBP1
5.86851e-31	0.956961	0.664	0.189	2.06689e-26	Proliferating	KIF20B
2.77675e-34	0.953744	0.443	0.07	9.7797e-30	Proliferating	LOC701826
6.90532e-25	0.952939	0.533	0.146	2.43205e-20	Proliferating	STK3
8.13905e-103	0.952869	0.574	0.009	2.86657e-98	Proliferating	MELK
3.1318e-55	0.952244	0.607	0.079	1.10302e-50	Proliferating	KIF22
5.6328e-81	0.948907	0.475	0.01	1.98387e-76	Proliferating	BUB1B
6.66022e-30	0.94371	0.82	0.311	2.34573e-25	Proliferating	SYNE2
1.8185e-18	0.940947	0.943	0.696	6.40476e-14	Proliferating	CALM2
1.9163e-25	0.935689	0.975	0.664	6.7492e-21	Proliferating	NUCKS1
2.34989e-20	0.932709	0.861	0.479	8.27632e-16	Proliferating	BAX
5.0728e-21	0.932454	0.648	0.272	1.78664e-16	Proliferating	CEP192
1.77397e-58	0.923898	0.598	0.067	6.24791e-54	Proliferating	RNASEH2A
1.62182e-28	0.922551	0.787	0.276	5.71206e-24	Proliferating	CEP128
5.73867e-93	0.920768	0.467	0.001	2.02116e-88	Proliferating	BIRC5
2.94512e-23	0.920684	0.811	0.345	1.03727e-18	Proliferating	MAMU-DRB1
8.42086e-69	0.919843	0.361	0.002	2.96583e-64	Proliferating	UBE2C
7.68143e-38	0.912676	0.803	0.231	2.7054e-33	Proliferating	SLC2A4RG
6.85159e-79	0.900538	0.426	0.005	2.41313e-74	Proliferating	MND1
1.90497e-29	0.892852	0.877	0.378	6.70932e-25	Proliferating	LSM3
9.76735e-51	0.890425	0.607	0.086	3.44006e-46	Proliferating	NDC80
4.81565e-92	0.887605	0.5	0.006	1.69607e-87	Proliferating	TK1
8.47641e-36	0.883979	0.713	0.182	2.98539e-31	Proliferating	MIS18BP1
4.07853e-69	0.883117	0.623	0.054	1.43646e-64	Proliferating	GMNN
1.97432e-29	0.880337	0.73	0.236	6.95354e-25	Proliferating	NCAPD3
3.19857e-18	0.880026	0.984	0.538	1.12654e-13	Proliferating	GZMB
2.08665e-86	0.872486	0.5	0.01	7.34918e-82	Proliferating	UHRF1
1.7032e-28	0.869067	0.82	0.334	5.99866e-24	Proliferating	RRM1
1.51862e-12	0.868954	0.402	0.156	5.34857e-08	Proliferating	LOC704341
1.94622e-24	0.865259	0.82	0.37	6.85458e-20	Proliferating	SNRPD1
4.39792e-30	0.861323	0.689	0.205	1.54895e-25	Proliferating	ALYREF
3.41499e-38	0.858418	0.713	0.17	1.20276e-33	Proliferating	LIN54
5.8349e-56	0.856824	0.41	0.022	2.05505e-51	Proliferating	CCNA2
3.55667e-30	0.855613	0.82	0.294	1.25266e-25	Proliferating	CENPK
3.11011e-17	0.853513	0.893	0.555	1.09538e-12	Proliferating	RPS27L
5.38062e-57	0.852621	0.631	0.08	1.89505e-52	Proliferating	ZNF367
5.58561e-41	0.852378	0.607	0.105	1.96725e-36	Proliferating	CLIC4
6.15773e-77	0.85152	0.59	0.035	2.16875e-72	Proliferating	POLQ
4.4728e-57	0.849668	0.59	0.066	1.57532e-52	Proliferating	ATAD5
1.88169e-26	0.849346	0.975	0.908	6.62733e-22	Proliferating	CFL1
9.56761e-26	0.848318	0.975	0.72	3.36971e-21	Proliferating	HNRNPA3
5.33204e-18	0.847984	0.975	0.547	1.87795e-13	Proliferating	NKG7
1.43923e-40	0.846853	0.623	0.121	5.06897e-36	Proliferating	LIG1
6.14319e-23	0.845252	0.869	0.439	2.16363e-18	Proliferating	IDH2
6.8692e-94	0.842439	0.516	0.007	2.41933e-89	Proliferating	SLC29A1
1.24121e-27	0.842283	0.721	0.232	4.37153e-23	Proliferating	MAST2
4.30336e-21	0.841163	0.877	0.546	1.51564e-16	Proliferating	ERH
1.75683e-55	0.839923	0.475	0.037	6.18754e-51	Proliferating	CCNE2
6.13338e-22	0.839263	0.811	0.387	2.16018e-17	Proliferating	SUZ12
3.80772e-59	0.838087	0.484	0.035	1.34108e-54	Proliferating	TPX2
6.24861e-20	0.835021	0.975	0.863	2.20076e-15	Proliferating	S100A10
1.07395e-56	0.824746	0.557	0.058	3.78246e-52	Proliferating	FBXO5
1.50462e-67	0.823464	0.41	0.01	5.29926e-63	Proliferating	LOC106994082
2.87924e-26	0.823459	0.836	0.357	1.01407e-21	Proliferating	VRK1
5.35535e-55	0.823094	0.566	0.06	1.88615e-50	Proliferating	POLA2
2.79952e-26	0.8202	0.959	0.882	9.8599e-22	Proliferating	EMP3
2.76134e-20	0.81942	0.77	0.378	9.72545e-16	Proliferating	SUPT16H
8.93869e-26	0.812893	0.902	0.453	3.14821e-21	Proliferating	SNRPG
2.65131e-27	0.811313	0.689	0.216	9.33793e-23	Proliferating	TACC3
4.23752e-24	0.81067	0.893	0.426	1.49245e-19	Proliferating	SMC3
2.09386e-18	0.809205	0.951	0.506	7.37456e-14	Proliferating	ZEB2
2.92858e-22	0.808373	0.885	0.618	1.03144e-17	Proliferating	RAN
1.13153e-25	0.807176	0.77	0.304	3.98526e-21	Proliferating	ANAPC11
1.62012e-14	0.804976	0.918	0.677	5.70608e-10	Proliferating	FAF1
3.91207e-44	0.802654	0.754	0.162	1.37783e-39	Proliferating	DNAJC9
1.1753e-19	0.789469	0.861	0.46	4.13942e-15	Proliferating	PLP2
1.51646e-25	0.788766	0.844	0.388	5.34097e-21	Proliferating	NDUFB6
8.11118e-20	0.787328	0.91	0.601	2.85676e-15	Proliferating	TPI1
1.52755e-19	0.785699	0.967	0.786	5.38005e-15	Proliferating	SET
2.94361e-24	0.780726	0.869	0.408	1.03674e-19	Proliferating	HNRNPAB
3.25326e-88	0.776695	0.525	0.013	1.1458e-83	Proliferating	GINS2
4.97954e-84	0.775238	0.492	0.01	1.7538e-79	Proliferating	GTSE1
4.62003e-22	0.774964	0.959	0.717	1.62718e-17	Proliferating	COX8A
1.89296e-38	0.774696	0.41	0.046	6.667e-34	Proliferating	CENPE
2.94608e-19	0.774435	0.902	0.574	1.03761e-14	Proliferating	BANF1
2.52294e-35	0.773664	0.836	0.251	8.8858e-31	Proliferating	RNASEH2B
1.28292e-10	0.769283	0.746	0.445	4.51844e-06	Proliferating	ARL6IP1
7.07054e-26	0.768147	0.746	0.268	2.49024e-21	Proliferating	USP1
7.00566e-33	0.76767	0.77	0.228	2.46739e-28	Proliferating	C5H4orf27
4.47576e-85	0.765971	0.566	0.022	1.57636e-80	Proliferating	POLE2
5.41168e-34	0.765111	0.672	0.169	1.90599e-29	Proliferating	CDK4
6.35486e-31	0.764121	0.672	0.184	2.23818e-26	Proliferating	CBX5
2.65167e-37	0.763959	0.607	0.123	9.33919e-33	Proliferating	SKA2
6.299e-75	0.757929	0.467	0.014	2.21851e-70	Proliferating	MXD3
1.80182e-23	0.756849	0.902	0.518	6.346e-19	Proliferating	PSMB6
4.51699e-45	0.754789	0.467	0.05	1.59089e-40	Proliferating	DDX11
7.17165e-25	0.751353	0.885	0.445	2.52585e-20	Proliferating	NASP
1.08268e-16	0.747965	0.844	0.467	3.8132e-12	Proliferating	NUCB2
8.45248e-68	0.747795	0.41	0.01	2.97696e-63	Proliferating	CDCA2
2.25769e-21	0.7466	0.648	0.227	7.95158e-17	Proliferating	ZRANB3
1.85278e-21	0.746007	0.959	0.773	6.52549e-17	Proliferating	SUMO2
6.67777e-75	0.74263	0.541	0.027	2.35191e-70	Proliferating	BARD1
1.52285e-64	0.739988	0.434	0.017	5.36348e-60	Proliferating	DLGAP5
1.48705e-24	0.739616	0.926	0.407	5.23738e-20	Proliferating	TESC
1.14636e-17	0.738724	0.959	0.689	4.0375e-13	Proliferating	LY6E-1
2.20108e-44	0.738606	0.656	0.116	7.7522e-40	Proliferating	DTYMK
2.1163e-27	0.735547	0.623	0.18	7.45362e-23	Proliferating	DCTPP1
3.54965e-66	0.734351	0.484	0.025	1.25019e-61	Proliferating	CDC45
1.87011e-47	0.733996	0.41	0.032	6.58653e-43	Proliferating	CDKN3
1.82891e-65	0.733448	0.385	0.008	6.44142e-61	Proliferating	RAD54L
8.8503e-28	0.731699	0.443	0.085	3.11707e-23	Proliferating	C1H1orf21
6.14817e-20	0.73011	0.877	0.526	2.16538e-15	Proliferating	VDAC3
2.94256e-18	0.729872	0.762	0.327	1.03637e-13	Proliferating	SPN
1.65242e-17	0.729623	0.615	0.236	5.81983e-13	Proliferating	KLRF1
3.7808e-21	0.72955	0.91	0.596	1.3316e-16	Proliferating	COX6B1
1.22175e-12	0.729176	0.664	0.356	4.30299e-08	Proliferating	TUBA1A
7.7176e-21	0.728604	0.787	0.343	2.71814e-16	Proliferating	ANP32E
5.69084e-22	0.728271	0.721	0.29	2.00431e-17	Proliferating	RBL1
5.12484e-18	0.727349	0.934	0.725	1.80497e-13	Proliferating	NDUFB1
5.9077e-15	0.727315	0.697	0.345	2.08069e-10	Proliferating	MAZ
7.10659e-16	0.727299	0.902	0.554	2.50294e-11	Proliferating	YWHAQ
2.24208e-16	0.7247	0.893	0.591	7.8966e-12	Proliferating	TXN
1.80563e-22	0.72444	0.844	0.389	6.35942e-18	Proliferating	IER3IP1
5.93218e-31	0.724117	0.713	0.202	2.08931e-26	Proliferating	BCAP29
1.41906e-35	0.723372	0.705	0.173	4.99794e-31	Proliferating	TFDP1
2.93066e-65	0.723223	0.451	0.02	1.03218e-60	Proliferating	MCM10
1.25682e-52	0.722761	0.451	0.035	4.42654e-48	Proliferating	HMGB3
5.94384e-18	0.721803	0.828	0.469	2.09342e-13	Proliferating	H2AFY
8.72627e-28	0.719347	0.664	0.195	3.07339e-23	Proliferating	FDPS
2.40682e-89	0.716712	0.451	0.001	8.47681e-85	Proliferating	PKMYT1
1.87662e-14	0.715395	0.73	0.342	6.60944e-10	Proliferating	CD74
4.34944e-22	0.714981	0.91	0.569	1.53187e-17	Proliferating	HNRNPR
9.15279e-22	0.714284	0.951	0.553	3.22361e-17	Proliferating	RHEB
2.44735e-28	0.712947	0.713	0.216	8.61956e-24	Proliferating	SDF2L1
9.79984e-17	0.712808	0.967	0.824	3.4515e-12	Proliferating	STAG1
2.27974e-65	0.70961	0.361	0.005	8.02925e-61	Proliferating	SGO2
2.6625e-21	0.709598	0.967	0.622	9.37733e-17	Proliferating	UCP2
3.63541e-17	0.708892	0.607	0.241	1.28039e-12	Proliferating	UBE2S
4.3007e-15	0.706227	0.918	0.463	1.51471e-10	Proliferating	RAP1GAP2
2.31962e-20	0.704108	0.967	0.764	8.16971e-16	Proliferating	YBX1
4.33656e-18	0.702357	0.844	0.458	1.52734e-13	Proliferating	DDX39A
1.82757e-20	0.699207	0.918	0.448	6.4367e-16	Proliferating	HOPX
5.38029e-18	0.698204	0.803	0.41	1.89494e-13	Proliferating	CENPC
3.12279e-56	0.697339	0.557	0.056	1.09985e-51	Proliferating	CHAF1A
7.73529e-15	0.697173	0.967	0.66	2.72437e-10	Proliferating	PDE3B
5.41341e-22	0.695213	0.689	0.251	1.9066e-17	Proliferating	PBX3
2.4269e-45	0.694853	0.508	0.063	8.54755e-41	Proliferating	ORC6
8.13067e-15	0.693329	0.877	0.462	2.86362e-10	Proliferating	GZMM
2.55909e-25	0.692375	0.73	0.244	9.01313e-21	Proliferating	HPRT1
4.26638e-19	0.682472	0.967	0.673	1.50262e-14	Proliferating	GLIPR2
4.2582e-41	0.68123	0.393	0.037	1.49974e-36	Proliferating	CDKN2C
8.58494e-47	0.678923	0.484	0.052	3.02361e-42	Proliferating	ARHGAP11A
1.22288e-19	0.678481	0.926	0.642	4.30698e-15	Proliferating	GNG5
8.21968e-19	0.678081	0.959	0.917	2.89497e-14	Proliferating	UBB
8.55197e-20	0.674763	0.951	0.428	3.012e-15	Proliferating	GZMH
4.1666e-62	0.673818	0.41	0.015	1.46748e-57	Proliferating	LOC106999862
7.98438e-19	0.673243	0.82	0.411	2.8121e-14	Proliferating	RNASEH2C
1.64521e-14	0.673009	0.861	0.579	5.79441e-10	Proliferating	NDUFB11
2.9526e-72	0.670764	0.434	0.01	1.03991e-67	Proliferating	KIF4A
5.08924e-14	0.67038	0.984	0.896	1.79243e-09	Proliferating	VIM
4.23979e-49	0.669911	0.484	0.048	1.49325e-44	Proliferating	GINS1
1.25852e-75	0.669722	0.516	0.022	4.4325e-71	Proliferating	POC1A
1.50278e-68	0.669475	0.451	0.016	5.2928e-64	Proliferating	MYBL2
3.13281e-11	0.668991	0.91	0.626	1.10338e-06	Proliferating	PBRM1
7.15021e-69	0.668835	0.451	0.016	2.5183e-64	Proliferating	RAD51
2.97762e-13	0.668125	0.91	0.671	1.04872e-08	Proliferating	LOC694887
9.28909e-24	0.666332	0.787	0.293	3.27162e-19	Proliferating	CCDC167
7.46469e-30	0.665198	0.566	0.132	2.62906e-25	Proliferating	PRIM1
6.79488e-42	0.664367	0.574	0.093	2.39316e-37	Proliferating	BRI3BP
5.55442e-14	0.663951	0.918	0.63	1.95627e-09	Proliferating	SRSF2
3.50228e-59	0.663496	0.402	0.016	1.2335e-54	Proliferating	TTK
8.59557e-23	0.662274	0.689	0.236	3.02736e-18	Proliferating	RAD50
8.79964e-37	0.659325	0.574	0.11	3.09923e-32	Proliferating	RFC4
1.75444e-16	0.657456	0.984	0.876	6.17912e-12	Proliferating	HSPA8
1.47772e-27	0.654436	0.689	0.204	5.20454e-23	Proliferating	RPA1
4.64849e-18	0.654279	0.762	0.317	1.6372e-13	Proliferating	CX3CR1
6.83931e-15	0.650942	0.811	0.448	2.40881e-10	Proliferating	TFDP2
3.04748e-23	0.649609	0.623	0.197	1.07332e-18	Proliferating	TUBGCP3
2.0745e-40	0.649371	0.557	0.088	7.30638e-36	Proliferating	LOC719437
1.80496e-20	0.649013	0.836	0.386	6.35706e-16	Proliferating	P4HB
2.75139e-19	0.648848	0.828	0.38	9.69041e-15	Proliferating	LOC696959
7.26405e-26	0.648536	0.631	0.183	2.5584e-21	Proliferating	POLD3
5.47195e-25	0.647883	0.582	0.154	1.92722e-20	Proliferating	SPINK2
3.38835e-23	0.647533	1	0.913	1.19338e-18	Proliferating	HNRNPA2B1
5.25574e-20	0.646048	0.926	0.559	1.85107e-15	Proliferating	SNRPD3
5.45123e-19	0.645531	0.721	0.28	1.91992e-14	Proliferating	LOC114669810
4.75252e-44	0.644915	0.492	0.06	1.67384e-39	Proliferating	NCAPD2
2.01082e-18	0.640935	0.525	0.166	7.0821e-14	Proliferating	TRIM37
3.27795e-17	0.640084	0.902	0.487	1.1545e-12	Proliferating	SSBP4
2.34663e-45	0.638486	0.533	0.068	8.26484e-41	Proliferating	NCAPH2
8.39197e-17	0.637469	0.566	0.196	2.95565e-12	Proliferating	CD8A
1.08029e-26	0.636199	0.533	0.129	3.80478e-22	Proliferating	HBA1
1.24598e-13	0.636029	0.926	0.647	4.38835e-09	Proliferating	TAF15
3.06806e-21	0.63599	0.951	0.622	1.08057e-16	Proliferating	PSMA2
5.53087e-25	0.635447	0.795	0.3	1.94797e-20	Proliferating	RBBP7
4.81013e-17	0.633263	0.549	0.19	1.69413e-12	Proliferating	LIN52
1.54554e-73	0.631317	0.508	0.022	5.44338e-69	Proliferating	CENPN
1.1165e-40	0.630283	0.402	0.041	3.93233e-36	Proliferating	PRC1
3.83588e-62	0.627742	0.328	0.002	1.351e-57	Proliferating	NEIL3
1.46593e-22	0.626897	0.639	0.205	5.16299e-18	Proliferating	SMC6
3.58215e-22	0.62567	0.746	0.29	1.26163e-17	Proliferating	TOPBP1
9.53141e-25	0.625147	0.459	0.105	3.35696e-20	Proliferating	MPHOSPH9
2.42692e-30	0.625126	0.631	0.148	8.5476e-26	Proliferating	DSN1
2.88361e-26	0.623493	0.508	0.119	1.01561e-21	Proliferating	AURKB
8.48149e-14	0.620674	0.795	0.415	2.98718e-09	Proliferating	TMTC2
4.06018e-16	0.620056	0.967	0.817	1.42999e-11	Proliferating	PSMA7
1.21495e-20	0.617544	0.787	0.314	4.27906e-16	Proliferating	RABL6
1.70494e-17	0.615738	0.91	0.552	6.00481e-13	Proliferating	PPP1CA
4.69337e-11	0.614533	0.779	0.483	1.653e-06	Proliferating	PDS5B
1.71079e-16	0.614517	0.77	0.348	6.0254e-12	Proliferating	CLEC12A
9.04929e-72	0.614344	0.41	0.007	3.18716e-67	Proliferating	CDC6
9.85092e-33	0.612812	0.492	0.088	3.46949e-28	Proliferating	FANCA
2.16378e-19	0.612767	0.656	0.231	7.62083e-15	Proliferating	SRGAP2
3.03598e-64	0.610883	0.451	0.02	1.06927e-59	Proliferating	CENPJ
1.40335e-28	0.610553	0.639	0.177	4.94258e-24	Proliferating	PHF19
1.17682e-35	0.610529	0.639	0.134	4.14477e-31	Proliferating	SSRP1
7.43441e-71	0.609415	0.475	0.019	2.6184e-66	Proliferating	FEN1
2.07463e-14	0.607058	0.926	0.713	7.30684e-10	Proliferating	RBM3
3.29343e-14	0.60651	0.77	0.395	1.15995e-09	Proliferating	DCTN3
2.64717e-36	0.605303	0.615	0.124	9.32332e-32	Proliferating	LOC107000378
7.67628e-38	0.604703	0.393	0.043	2.70359e-33	Proliferating	WDR62
2.52657e-65	0.603573	0.451	0.02	8.89859e-61	Proliferating	MCM2
2.82348e-65	0.60196	0.352	0.003	9.94429e-61	Proliferating	SKA3
3.01698e-20	0.60173	0.77	0.317	1.06258e-15	Proliferating	SUMO3
1.39014e-24	0.599798	0.615	0.174	4.89607e-20	Proliferating	PDZD11
6.0886e-26	0.599243	0.631	0.175	2.1444e-21	Proliferating	RECQL
6.63632e-24	0.598474	0.697	0.22	2.33731e-19	Proliferating	FAM111A
1.57687e-14	0.597036	0.852	0.454	5.55372e-10	Proliferating	PKM
9.94016e-20	0.595966	0.607	0.192	3.50092e-15	Proliferating	MCMBP
5.14576e-40	0.595413	0.557	0.088	1.81234e-35	Proliferating	HIRIP3
9.36055e-14	0.595264	0.943	0.641	3.29679e-09	Proliferating	HNRNPD
1.83587e-20	0.595249	0.623	0.209	6.46594e-16	Proliferating	TMEM109
1.49872e-15	0.592251	0.623	0.255	5.27851e-11	Proliferating	ALMS1
7.45835e-13	0.591446	0.918	0.677	2.62683e-08	Proliferating	NDUFB2
2.10633e-14	0.58921	0.885	0.541	7.4185e-10	Proliferating	NDUFB7
1.09156e-14	0.588535	0.902	0.599	3.84449e-10	Proliferating	SLC25A5
2.3511e-14	0.58378	0.811	0.417	8.28056e-10	Proliferating	POLE4
1.47057e-13	0.583297	0.975	0.941	5.17934e-09	Proliferating	ACTG1
3.99953e-36	0.583275	0.492	0.078	1.40863e-31	Proliferating	LOC710110
1.42752e-71	0.582147	0.402	0.006	5.02773e-67	Proliferating	KIF23
1.5769e-75	0.581752	0.41	0.005	5.55383e-71	Proliferating	SPC24
2.63159e-15	0.581179	0.943	0.659	9.26848e-11	Proliferating	HMGN1
1.78895e-14	0.58107	0.902	0.616	6.30069e-10	Proliferating	RBX1
4.07226e-13	0.58083	0.91	0.608	1.43425e-08	Proliferating	ITGB2
1.82079e-70	0.580706	0.377	0.003	6.41282e-66	Proliferating	CENPH
5.78714e-15	0.580663	0.943	0.687	2.03823e-10	Proliferating	SRSF10
2.41149e-15	0.580157	0.77	0.362	8.49327e-11	Proliferating	CISD3
4.36688e-17	0.579187	0.967	0.905	1.53801e-12	Proliferating	LOC694289
1.77993e-14	0.57865	0.959	0.657	6.26891e-10	Proliferating	ANXA2
1.95963e-15	0.578408	0.967	0.812	6.9018e-11	Proliferating	RHOA
1.46903e-12	0.577177	0.746	0.352	5.17393e-08	Proliferating	LSM8
1.48063e-22	0.575901	0.82	0.291	5.21476e-18	Proliferating	DOCK5
4.879e-19	0.574589	0.762	0.317	1.71839e-14	Proliferating	NUP210
4.38235e-32	0.573077	0.459	0.074	1.54346e-27	Proliferating	STIL
1.8315e-13	0.572106	0.902	0.533	6.45053e-09	Proliferating	PRKDC
2.64213e-18	0.571526	0.787	0.371	9.30558e-14	Proliferating	NDUFA12
6.17445e-15	0.570776	0.984	0.781	2.17464e-10	Proliferating	TPM3
5.85679e-14	0.570234	0.77	0.39	2.06276e-09	Proliferating	BAZ1B
4.53307e-29	0.568995	0.443	0.076	1.59655e-24	Proliferating	WEE1
7.77808e-14	0.568371	0.549	0.207	2.73944e-09	Proliferating	RPA2
4.41316e-20	0.567703	0.566	0.169	1.55432e-15	Proliferating	ACOT7
9.7074e-13	0.566815	0.926	0.73	3.41895e-08	Proliferating	TAGLN2
2.3225e-23	0.566127	0.516	0.134	8.17985e-19	Proliferating	ACYP1
1.30909e-12	0.565298	0.992	0.964	4.61062e-08	Proliferating	CD52
2.02185e-53	0.563735	0.402	0.022	7.12097e-49	Proliferating	UBE2T
2.60415e-13	0.560588	0.943	0.771	9.17182e-09	Proliferating	MYL12B
3.87733e-14	0.560363	0.656	0.293	1.36559e-09	Proliferating	HEBP2
8.34231e-05	0.560353	0.279	0.138	1	Proliferating	LOC720538
6.07871e-18	0.559036	0.426	0.115	2.14092e-13	Proliferating	PDLIM1
6.211e-18	0.559025	0.762	0.304	2.18751e-13	Proliferating	GOLIM4
4.40549e-15	0.558994	0.68	0.308	1.55161e-10	Proliferating	SMC1A
7.07461e-17	0.55737	0.648	0.248	2.49168e-12	Proliferating	CDK5RAP2
7.67213e-15	0.55674	0.656	0.265	2.70213e-10	Proliferating	TBX21
2.80064e-13	0.556593	0.869	0.474	9.86384e-09	Proliferating	RAB27A
9.07326e-37	0.556409	0.467	0.065	3.1956e-32	Proliferating	ANKRD9
9.0441e-25	0.556336	0.672	0.198	3.18533e-20	Proliferating	PGP
4.06936e-18	0.556192	0.73	0.293	1.43323e-13	Proliferating	NAA38
1.71537e-12	0.55619	0.902	0.692	6.04153e-08	Proliferating	COX7B
1.17738e-21	0.555014	0.639	0.209	4.14674e-17	Proliferating	BOLA3
2.15814e-42	0.554974	0.459	0.052	7.60098e-38	Proliferating	ASF1B
1.36313e-14	0.554856	0.943	0.619	4.80094e-10	Proliferating	CAP1
2.8878e-10	0.554738	0.844	0.565	1.01708e-05	Proliferating	APRT
2.10803e-35	0.553947	0.467	0.068	7.42447e-31	Proliferating	RBBP8
7.06404e-20	0.55349	0.549	0.171	2.48796e-15	Proliferating	AKR7A2
5.1317e-13	0.552927	0.885	0.587	1.80739e-08	Proliferating	SNRPD2
6.02545e-12	0.552523	0.926	0.68	2.12217e-07	Proliferating	PSIP1
6.33617e-15	0.551671	0.869	0.553	2.2316e-10	Proliferating	MGST3
1.29438e-05	0.550878	0.877	0.635	0.455881	Proliferating	H1FX
1.9298e-20	0.550846	0.557	0.168	6.79675e-16	Proliferating	E2F3
1.97297e-14	0.550008	0.754	0.374	6.94881e-10	Proliferating	MPC2
2.58007e-26	0.549274	0.615	0.163	9.08699e-22	Proliferating	INTS7
1.56786e-10	0.549126	0.77	0.503	5.52199e-06	Proliferating	RAD21
4.61222e-20	0.548962	0.582	0.182	1.62442e-15	Proliferating	TRIOBP
1.28768e-33	0.547319	0.492	0.081	4.53519e-29	Proliferating	CDCA4
1.89297e-06	0.547306	0.951	0.819	0.0666703	Proliferating	LOC114673461
3.48401e-50	0.547103	0.385	0.022	1.22707e-45	Proliferating	CKAP2L
3.2703e-09	0.546987	0.541	0.279	0.00011518	Proliferating	LOC114676051
1.47403e-16	0.546305	0.77	0.355	5.19153e-12	Proliferating	SNRPF
1.2481e-27	0.546236	0.533	0.119	4.39581e-23	Proliferating	POLD2
4.56874e-10	0.544031	0.926	0.677	1.60911e-05	Proliferating	LOC106993196
1.26838e-11	0.543892	0.902	0.65	4.46724e-07	Proliferating	LOC696956
2.25985e-14	0.543384	0.91	0.61	7.9592e-10	Proliferating	XRCC5
1.13972e-13	0.542243	0.91	0.613	4.01408e-09	Proliferating	CBX3
8.96601e-64	0.542231	0.336	0.002	3.15783e-59	Proliferating	FOXM1
7.11336e-16	0.541782	0.631	0.251	2.50533e-11	Proliferating	C1H1orf35
6.01125e-21	0.540831	0.541	0.16	2.11716e-16	Proliferating	TRNAU1AP
1.62732e-17	0.540601	0.418	0.11	5.73143e-13	Proliferating	THY1
2.65457e-18	0.540223	0.508	0.148	9.3494e-14	Proliferating	ST8SIA1
1.38966e-36	0.54013	0.287	0.017	4.89439e-32	Proliferating	CDC25A
4.75134e-14	0.539569	0.918	0.546	1.67342e-09	Proliferating	PSME2
2.35982e-12	0.539399	0.926	0.632	8.31128e-08	Proliferating	NEDD8
7.48612e-15	0.537904	0.77	0.386	2.63661e-10	Proliferating	NDUFS8
1.1475e-15	0.537715	0.762	0.357	4.0415e-11	Proliferating	LAGE3
9.40964e-13	0.536614	0.861	0.48	3.31407e-08	Proliferating	SRP9
7.76334e-18	0.533302	0.73	0.301	2.73425e-13	Proliferating	HINT2
4.11132e-15	0.533171	0.508	0.183	1.44801e-10	Proliferating	CKAP5
1.7787e-65	0.532976	0.352	0.003	6.26457e-61	Proliferating	E2F8
2.17827e-74	0.532728	0.369	0	7.67186e-70	Proliferating	CDCA5
4.81356e-12	0.532306	0.951	0.698	1.69534e-07	Proliferating	GNAI2
3.07139e-07	0.5308	0.73	0.46	0.0108174	Proliferating	LOC114678430
3.37246e-14	0.530784	0.787	0.368	1.18778e-09	Proliferating	CLIC5
7.95365e-13	0.530122	0.959	0.803	2.80128e-08	Proliferating	IFI16
1.61621e-16	0.529953	0.803	0.371	5.69228e-12	Proliferating	SNF8
4.14165e-13	0.529112	0.885	0.584	1.45869e-08	Proliferating	ATP5IF1
5.62628e-18	0.52793	0.566	0.187	1.98158e-13	Proliferating	TRAPPC6A
8.16515e-12	0.527786	0.811	0.428	2.87577e-07	Proliferating	RB1
4.00083e-29	0.527483	0.459	0.081	1.40909e-24	Proliferating	CDC7
6.95125e-12	0.527363	0.902	0.568	2.44823e-07	Proliferating	DDX46
3.50557e-46	0.526105	0.418	0.034	1.23466e-41	Proliferating	CIP2A
1.26848e-18	0.52585	0.533	0.166	4.46759e-14	Proliferating	PCNT
1.73519e-19	0.523863	0.574	0.184	6.11133e-15	Proliferating	AHSA2P
2.92018e-12	0.52304	0.697	0.321	1.02849e-07	Proliferating	UBAP2
3.28633e-38	0.522722	0.418	0.049	1.15744e-33	Proliferating	NRM
3.84215e-18	0.522285	0.631	0.225	1.35321e-13	Proliferating	HDGF
3.92334e-12	0.52162	0.967	0.837	1.3818e-07	Proliferating	RAC2
8.15127e-12	0.521069	0.885	0.57	2.87088e-07	Proliferating	ARHGDIA
1.92145e-10	0.520942	0.967	0.818	6.76733e-06	Proliferating	UBL5
9.07929e-26	0.517324	0.533	0.124	3.19772e-21	Proliferating	SNRPA
1.86885e-34	0.517261	0.484	0.076	6.5821e-30	Proliferating	LOC719262
6.46312e-50	0.517004	0.361	0.017	2.27631e-45	Proliferating	NCAPH
1.76853e-62	0.516487	0.32	0.001	6.22877e-58	Proliferating	FAM111B
2.86078e-22	0.516319	0.598	0.173	1.00757e-17	Proliferating	SAE1
2.63588e-10	0.515898	0.787	0.466	9.28359e-06	Proliferating	YWHAH
1.96382e-11	0.515365	0.697	0.345	6.91659e-07	Proliferating	PYCARD
1.74755e-43	0.515357	0.303	0.014	6.15488e-39	Proliferating	HJURP
4.47967e-08	0.515023	0.836	0.575	0.00157774	Proliferating	SMYD3
2.63454e-15	0.514301	0.689	0.279	9.27886e-11	Proliferating	ACP1
2.55203e-16	0.513554	0.803	0.351	8.98824e-12	Proliferating	NKG2D
8.89899e-25	0.512351	0.41	0.079	3.13423e-20	Proliferating	LIN9
5.93056e-12	0.511528	0.762	0.394	2.08874e-07	Proliferating	MRPL34
1.085e-11	0.511489	0.91	0.644	3.82138e-07	Proliferating	NDUFA11
2.38385e-12	0.511063	0.943	0.774	8.39593e-08	Proliferating	HNRNPF
3.58521e-31	0.510945	0.492	0.09	1.26271e-26	Proliferating	CCP110
2.15717e-14	0.50916	0.852	0.502	7.59754e-10	Proliferating	TALDO1
5.52433e-14	0.508644	0.68	0.292	1.94567e-09	Proliferating	LOC100427190
4.38187e-19	0.508502	0.631	0.213	1.5433e-14	Proliferating	TSPAN2
8.35226e-54	0.507815	0.336	0.009	2.94167e-49	Proliferating	CENPI
4.88973e-26	0.506767	0.295	0.035	1.72216e-21	Proliferating	MASTL
8.13068e-10	0.506265	0.967	0.933	2.86362e-05	Proliferating	SH3BGRL3
1.47276e-17	0.5058	0.992	0.904	5.18707e-13	Proliferating	HSP90AA1
1.26184e-11	0.503315	0.713	0.346	4.4442e-07	Proliferating	BUB3
6.46408e-12	0.502835	0.836	0.48	2.27665e-07	Proliferating	LBR
3.35743e-13	0.502416	0.721	0.345	1.18249e-08	Proliferating	RAB4A
5.27755e-11	0.501034	0.475	0.197	1.85875e-06	Proliferating	ITPK1
1.17265e-11	0.500966	0.967	0.913	4.13007e-07	Proliferating	ARPC2
9.20444e-11	0.500636	0.648	0.313	3.2418e-06	Proliferating	COX20
2.03178e-19	0.500356	0.664	0.228	7.15594e-15	Proliferating	PAGR1
4.3341e-12	0.499981	0.475	0.183	1.52647e-07	Proliferating	PRDX3
2.1783e-26	0.499656	0.451	0.089	7.67197e-22	Proliferating	SAMD1
1.22491e-20	0.497977	0.598	0.181	4.31413e-16	Proliferating	STARD7
1.16498e-09	0.496475	0.918	0.688	4.10307e-05	Proliferating	ANXA1
4.2822e-32	0.496469	0.451	0.071	1.50819e-27	Proliferating	LMNB2
2.69756e-12	0.495399	0.77	0.401	9.50081e-08	Proliferating	ANXA5
6.00343e-10	0.495385	0.795	0.472	2.11441e-05	Proliferating	PSMA5
5.14716e-43	0.494983	0.27	0.008	1.81283e-38	Proliferating	LOC695427
5.93406e-11	0.49448	0.959	0.853	2.08998e-06	Proliferating	ATP5MPL
2.80268e-19	0.494214	0.508	0.152	9.87104e-15	Proliferating	C6orf125
1.57194e-13	0.492875	0.598	0.239	5.53637e-09	Proliferating	CLECL1
1.4778e-11	0.492685	0.852	0.509	5.20481e-07	Proliferating	DAD1
1.41212e-19	0.492246	0.311	0.057	4.97349e-15	Proliferating	LOC697805
1.77867e-14	0.491246	0.721	0.329	6.26448e-10	Proliferating	RIF1
1.26555e-60	0.490596	0.369	0.009	4.45726e-56	Proliferating	PARPBP
6.1599e-07	0.490488	0.754	0.48	0.0216952	Proliferating	KIAA1328
1.74936e-13	0.490451	0.516	0.197	6.16126e-09	Proliferating	DERA
4.31208e-20	0.490375	0.639	0.212	1.51872e-15	Proliferating	NUDT1
2.88317e-12	0.490272	0.689	0.327	1.01545e-07	Proliferating	SPECC1L
5.56762e-18	0.490167	0.598	0.204	1.96092e-13	Proliferating	NELFE
2.50119e-15	0.489752	0.385	0.11	8.80918e-11	Proliferating	SPATS2L
2.84694e-37	0.489556	0.475	0.064	1.00269e-32	Proliferating	SASS6
7.28428e-16	0.488447	0.623	0.227	2.56552e-11	Proliferating	LMO4
1.46529e-14	0.48673	0.607	0.243	5.16076e-10	Proliferating	PFKL
1.01411e-17	0.48657	0.631	0.216	3.57168e-13	Proliferating	APMAP
7.40429e-15	0.484945	0.639	0.25	2.60779e-10	Proliferating	PMVK
8.185e-24	0.484416	0.656	0.187	2.88276e-19	Proliferating	POLE3
3.86821e-12	0.484385	0.885	0.555	1.36238e-07	Proliferating	COPE
3.04298e-10	0.484039	0.631	0.313	1.07174e-05	Proliferating	FKBP2
1.818e-12	0.482968	0.648	0.298	6.40301e-08	Proliferating	B3GLCT
9.92635e-36	0.482681	0.303	0.022	3.49606e-31	Proliferating	LOC709988
3.81321e-11	0.482227	0.77	0.409	1.34301e-06	Proliferating	ATR
5.85098e-35	0.481526	0.393	0.046	2.06072e-30	Proliferating	MTFR2
9.83452e-15	0.481521	0.992	0.964	3.46372e-10	Proliferating	CALM1
5.28588e-13	0.481472	0.746	0.35	1.86169e-08	Proliferating	AP2S1
2.01113e-40	0.481052	0.385	0.035	7.08319e-36	Proliferating	ZWILCH
1.71776e-13	0.480844	0.803	0.426	6.04994e-09	Proliferating	CDK2AP2
2.41739e-11	0.478667	0.615	0.264	8.51406e-07	Proliferating	MAMU-DRA
4.11804e-13	0.477431	0.672	0.304	1.45038e-08	Proliferating	IPO9
4.83288e-16	0.477191	0.836	0.368	1.70214e-11	Proliferating	SEPTIN11
2.01217e-22	0.476411	0.516	0.132	7.08687e-18	Proliferating	MAD2L2
1.86056e-13	0.475792	0.754	0.351	6.55289e-09	Proliferating	TPM4
2.37109e-12	0.475752	0.672	0.307	8.35097e-08	Proliferating	ARL2
1.31559e-48	0.475659	0.328	0.013	4.6335e-44	Proliferating	KNSTRN
2.57056e-21	0.475125	0.516	0.138	9.05351e-17	Proliferating	MZT1
1.23179e-11	0.474927	0.861	0.492	4.33835e-07	Proliferating	RTN3
3.53453e-12	0.474427	0.705	0.348	1.24486e-07	Proliferating	CBX1
3.72878e-14	0.473773	0.73	0.343	1.31328e-09	Proliferating	MRPL57
3.16681e-11	0.473119	0.869	0.547	1.11535e-06	Proliferating	RALY
6.94056e-20	0.472951	0.549	0.158	2.44446e-15	Proliferating	TRIAP1
4.94229e-13	0.472908	0.557	0.222	1.74067e-08	Proliferating	ST3GAL3
1.62006e-08	0.471791	0.754	0.441	0.000570584	Proliferating	TTC3
4.7841e-13	0.471661	0.598	0.235	1.68496e-08	Proliferating	ACAT2
3.45329e-13	0.471224	0.557	0.22	1.21625e-08	Proliferating	IFT88
2.54875e-06	0.471222	0.664	0.4	0.089767	Proliferating	COMMD10
1.32722e-22	0.471177	0.492	0.119	4.67447e-18	Proliferating	RAD51C
1.47623e-13	0.470887	0.459	0.151	5.1993e-09	Proliferating	COPRS
1.32806e-15	0.470654	0.697	0.28	4.67742e-11	Proliferating	DYNLL2
1.88994e-24	0.469404	0.369	0.064	6.65638e-20	Proliferating	MTBP
4.86689e-12	0.468794	0.877	0.483	1.71412e-07	Proliferating	SNRPE
5.6718e-12	0.468318	0.959	0.803	1.99761e-07	Proliferating	YWHAB
8.01317e-09	0.468195	0.836	0.548	0.000282224	Proliferating	LSM7
1.72712e-38	0.467998	0.344	0.028	6.08292e-34	Proliferating	INCENP
1.43975e-09	0.467928	0.877	0.584	5.07078e-05	Proliferating	STK39
8.84109e-66	0.467899	0.336	0.001	3.11383e-61	Proliferating	ESCO2
1.57203e-20	0.466853	0.566	0.165	5.53669e-16	Proliferating	AKT1
2.86169e-13	0.466617	0.68	0.306	1.00789e-08	Proliferating	PSMG2
2.86743e-11	0.466521	0.926	0.667	1.00991e-06	Proliferating	LDHA
1.06408e-10	0.465592	0.836	0.495	3.74771e-06	Proliferating	MYO1G
1.89305e-38	0.46505	0.262	0.01	6.6673e-34	Proliferating	KIF14
1.46592e-27	0.464646	0.336	0.045	5.16298e-23	Proliferating	FANCL
1.42782e-28	0.464412	0.311	0.036	5.02878e-24	Proliferating	CKAP2
4.12106e-18	0.464383	0.533	0.167	1.45144e-13	Proliferating	CEP78
6.64951e-07	0.464037	0.73	0.492	0.0234196	Proliferating	SPIDR
1.82244e-17	0.463296	0.713	0.262	6.41863e-13	Proliferating	ITGB1BP1
2.02519e-08	0.463004	0.803	0.487	0.000713271	Proliferating	SRSF9
2.33129e-19	0.462194	0.492	0.138	8.2108e-15	Proliferating	FGFBP2
4.70132e-22	0.461439	0.475	0.112	1.6558e-17	Proliferating	PAXIP1
1.33422e-50	0.460537	0.27	0.002	4.69913e-46	Proliferating	ANLN
4.28071e-08	0.460445	0.672	0.387	0.00150767	Proliferating	SLC20A1
2.3868e-14	0.459969	0.5	0.174	8.40633e-10	Proliferating	RFWD3
2.2324e-62	0.459658	0.32	0.001	7.8625e-58	Proliferating	CDCA3
5.1323e-08	0.459339	0.803	0.514	0.0018076	Proliferating	UBE2I
5.61839e-07	0.457541	0.861	0.642	0.019788	Proliferating	LOC106997893
5.74222e-09	0.456239	0.484	0.219	0.000202241	Proliferating	ACER3
3.20465e-11	0.455565	0.902	0.486	1.12868e-06	Proliferating	RGS9
3.64747e-10	0.455128	0.811	0.455	1.28464e-05	Proliferating	RPS6KA5
1.93532e-33	0.454874	0.361	0.041	6.8162e-29	Proliferating	MCM8
1.15928e-24	0.454774	0.443	0.09	4.08297e-20	Proliferating	MGME1
6.13236e-10	0.453102	0.41	0.16	2.15982e-05	Proliferating	WDR63
1.86058e-10	0.4531	0.869	0.584	6.55297e-06	Proliferating	DBI
5.85827e-11	0.453084	0.803	0.462	2.06328e-06	Proliferating	PA2G4
9.49267e-08	0.453046	0.943	0.746	0.00334332	Proliferating	DOCK2
4.90287e-09	0.452032	0.746	0.432	0.000172679	Proliferating	CEBPB
3.73102e-22	0.451306	0.68	0.209	1.31407e-17	Proliferating	CMAS
3.22511e-32	0.451244	0.402	0.054	1.13588e-27	Proliferating	WDR34
6.34177e-09	0.45037	0.508	0.231	0.000223357	Proliferating	CDK19
2.73424e-17	0.449667	0.566	0.19	9.63001e-13	Proliferating	HMGXB4
2.95344e-08	0.449211	0.467	0.212	0.0010402	Proliferating	TTLL5
2.14517e-17	0.448848	0.582	0.198	7.55529e-13	Proliferating	ATP13A3
6.06714e-25	0.448504	0.303	0.041	2.13685e-20	Proliferating	CCDC34
6.09916e-10	0.448193	0.91	0.664	2.14813e-05	Proliferating	PCBP1
1.14998e-08	0.447802	0.926	0.813	0.000405024	Proliferating	S100A11
2.06411e-47	0.447607	0.361	0.02	7.26978e-43	Proliferating	TCF19
2.12723e-09	0.447298	0.918	0.724	7.49212e-05	Proliferating	NDUFA3
6.26566e-13	0.447026	0.82	0.384	2.20676e-08	Proliferating	APOBEC3H
3.22407e-09	0.446683	0.959	0.864	0.000113552	Proliferating	CBLB
2.02283e-10	0.44639	0.705	0.384	7.12441e-06	Proliferating	PDCD5
9.30167e-37	0.44633	0.311	0.022	3.27605e-32	Proliferating	SPDL1
1.78481e-60	0.445687	0.369	0.009	6.28611e-56	Proliferating	ZWINT
7.57178e-21	0.444664	0.393	0.087	2.66678e-16	Proliferating	TEX30
5.15573e-42	0.444482	0.369	0.028	1.81585e-37	Proliferating	CDCA8
2.62409e-20	0.443717	0.516	0.143	9.24205e-16	Proliferating	NUP155
4.12778e-22	0.443524	0.533	0.139	1.4538e-17	Proliferating	TPRKB
2.44487e-42	0.442323	0.32	0.017	8.61083e-38	Proliferating	RDM1
4.31444e-11	0.442314	0.664	0.319	1.51955e-06	Proliferating	PRELID1
1.41204e-11	0.442015	0.492	0.183	4.97321e-07	Proliferating	FAM50A
1.2499e-13	0.441485	0.467	0.161	4.40217e-09	Proliferating	C7H15orf41
1.37e-17	0.441283	0.484	0.144	4.82512e-13	Proliferating	RBM15
4.26458e-11	0.440745	0.77	0.397	1.50199e-06	Proliferating	PHACTR2
7.19192e-12	0.439549	0.738	0.375	2.53299e-07	Proliferating	RNF167
4.45526e-21	0.439463	0.328	0.058	1.56914e-16	Proliferating	EPB41L2
6.31708e-11	0.439379	0.82	0.45	2.22488e-06	Proliferating	NDUFS6
4.36388e-11	0.439311	0.836	0.479	1.53696e-06	Proliferating	MRPL41
1.41038e-08	0.439074	0.762	0.437	0.000496737	Proliferating	DHRS7
3.17493e-11	0.438836	0.639	0.293	1.11821e-06	Proliferating	GPR141
8.92343e-13	0.438413	0.869	0.496	3.14283e-08	Proliferating	ITGB1
3.95588e-09	0.43793	0.869	0.579	0.000139326	Proliferating	LOC699443
3.35033e-08	0.437919	0.861	0.537	0.00117999	Proliferating	NDUFB10
1.31574e-16	0.437736	0.631	0.224	4.63403e-12	Proliferating	FIBP
3.55852e-11	0.437345	0.787	0.402	1.25331e-06	Proliferating	PPP2R2B
1.20077e-09	0.436887	0.672	0.345	4.22912e-05	Proliferating	CEP57
1.91845e-12	0.43667	0.779	0.367	6.75679e-08	Proliferating	PRF1
5.40732e-16	0.436431	0.434	0.127	1.90446e-11	Proliferating	IQCB1
2.76141e-24	0.43609	0.484	0.107	9.72569e-20	Proliferating	IKBIP
7.50531e-09	0.435913	0.877	0.606	0.000264337	Proliferating	LOC717879
4.4052e-09	0.435841	0.967	0.839	0.000155151	Proliferating	SEPTIN7
1.6468e-15	0.43468	0.615	0.224	5.80002e-11	Proliferating	MFSD14B
1.39544e-11	0.43464	0.91	0.542	4.91474e-07	Proliferating	AP1S2
2.2212e-09	0.434556	0.566	0.279	7.82306e-05	Proliferating	POLR2I
2.46346e-14	0.433209	0.713	0.3	8.67629e-10	Proliferating	EBP
4.22543e-52	0.432394	0.287	0.003	1.4882e-47	Proliferating	EXO1
8.84768e-11	0.432192	0.992	0.717	3.11615e-06	Proliferating	LCP1
3.94814e-08	0.431392	0.877	0.62	0.00139053	Proliferating	MZT2B
1.80739e-10	0.431048	0.943	0.628	6.36564e-06	Proliferating	PPP3CA
1.05438e-11	0.430718	0.754	0.363	3.71354e-07	Proliferating	USP37
9.81866e-43	0.430501	0.344	0.022	3.45813e-38	Proliferating	GEN1
1.71588e-09	0.430498	0.484	0.21	6.04334e-05	Proliferating	POT1
5.17029e-47	0.430145	0.32	0.013	1.82098e-42	Proliferating	LOC114674393
1.8693e-06	0.429221	0.762	0.534	0.0658367	Proliferating	SMARCC1
8.46805e-16	0.428999	0.639	0.234	2.98245e-11	Proliferating	AP1M1
4.98302e-48	0.426869	0.32	0.012	1.75502e-43	Proliferating	HMMR
1.3655e-06	0.426398	0.951	0.784	0.0480929	Proliferating	HCST
0.000185032	0.426079	0.434	0.24	1	Proliferating	SUCLA2
1.47059e-12	0.425897	0.639	0.285	5.1794e-08	Proliferating	PPP1R12B
7.28333e-09	0.42585	0.852	0.633	0.000256519	Proliferating	TMEM258
1.85895e-09	0.42583	0.738	0.371	6.54721e-05	Proliferating	JAKMIP2
8.21791e-10	0.425602	0.713	0.4	2.89435e-05	Proliferating	XPO1
3.50844e-21	0.425058	0.426	0.097	1.23567e-16	Proliferating	HAUS4
5.81102e-10	0.424923	0.779	0.43	2.04664e-05	Proliferating	RFC1
4.69915e-30	0.424387	0.361	0.046	1.65504e-25	Proliferating	FADS1
1.77512e-18	0.423277	0.369	0.082	6.25197e-14	Proliferating	CD109
2.3647e-42	0.423222	0.262	0.007	8.32847e-38	Proliferating	CCDC150
3.9073e-60	0.422975	0.328	0.003	1.37615e-55	Proliferating	SGO1
8.29921e-08	0.42278	0.861	0.659	0.00292298	Proliferating	ATP5PF
1.63095e-11	0.422447	0.877	0.458	5.7442e-07	Proliferating	MYO1F
4.65473e-46	0.421867	0.328	0.015	1.6394e-41	Proliferating	CENPT
2.47865e-06	0.420972	0.934	0.706	0.0872981	Proliferating	GABARAP
5.31541e-09	0.419711	0.902	0.692	0.000187209	Proliferating	ATP5MF
3.25736e-12	0.419659	0.705	0.314	1.14724e-07	Proliferating	TPD52
5.85551e-13	0.417746	0.664	0.286	2.06231e-08	Proliferating	CIAO2A
7.80309e-08	0.417041	0.934	0.733	0.00274825	Proliferating	SLCO3A1
3.08221e-13	0.416909	0.492	0.182	1.08556e-08	Proliferating	OXCT1
8.48365e-08	0.416716	0.803	0.512	0.00298794	Proliferating	GLCCI1
1.55165e-09	0.416297	0.852	0.498	5.4649e-05	Proliferating	PARK7
5.81449e-18	0.416294	0.434	0.118	2.04786e-13	Proliferating	MIS18A
2.14566e-09	0.415958	0.648	0.337	7.557e-05	Proliferating	CNIH4
4.3493e-08	0.415831	0.738	0.467	0.00153182	Proliferating	CSTB
2.28797e-09	0.41574	0.762	0.458	8.05824e-05	Proliferating	PSMD13
8.6382e-49	0.414043	0.262	0.002	3.04237e-44	Proliferating	CEP55
4.00548e-09	0.413694	0.91	0.589	0.000141073	Proliferating	PTPN22
1.02447e-43	0.412996	0.311	0.014	3.60818e-39	Proliferating	HBQ1
1.35143e-20	0.412798	0.566	0.163	4.75972e-16	Proliferating	HDAC3
2.58492e-32	0.412037	0.336	0.035	9.10407e-28	Proliferating	ARHGAP19
6.92548e-09	0.411644	0.959	0.789	0.000243915	Proliferating	ELOB
3.47477e-19	0.411506	0.361	0.079	1.22381e-14	Proliferating	RANGRF
1.59029e-31	0.411204	0.352	0.041	5.60101e-27	Proliferating	TIPIN
9.01923e-54	0.41109	0.287	0.002	3.17657e-49	Proliferating	PBK
1.47564e-40	0.410857	0.344	0.024	5.19721e-36	Proliferating	PLK4
8.63771e-06	0.410786	0.943	0.809	0.30422	Proliferating	LOC106996627
1.3181e-32	0.410494	0.361	0.041	4.64235e-28	Proliferating	CEP152
3.57119e-10	0.410446	0.73	0.386	1.25777e-05	Proliferating	COX17
6.06816e-49	0.408916	0.311	0.009	2.13721e-44	Proliferating	EME1
3.47486e-13	0.408718	0.738	0.341	1.22385e-08	Proliferating	SNRNP25
1.41665e-07	0.408552	0.877	0.641	0.00498943	Proliferating	NAP1L1
1.55203e-12	0.408164	0.697	0.311	5.46623e-08	Proliferating	SLAMF6
2.78792e-13	0.407986	0.492	0.178	9.81906e-09	Proliferating	SCCPDH
3.63583e-11	0.407728	0.533	0.231	1.28054e-06	Proliferating	C2CD3
9.2963e-09	0.407665	0.934	0.764	0.000327416	Proliferating	ENO1
1.01364e-14	0.407616	0.672	0.265	3.57004e-10	Proliferating	HAT1
8.54711e-09	0.407349	0.566	0.273	0.000301029	Proliferating	ANKRD28
3.287e-34	0.406253	0.352	0.036	1.15768e-29	Proliferating	TTF2
3.69641e-11	0.406089	0.861	0.447	1.30187e-06	Proliferating	LGALS3
1.82126e-10	0.40523	0.574	0.267	6.41447e-06	Proliferating	BOLA2B
7.64242e-14	0.405185	0.484	0.169	2.69166e-09	Proliferating	ZDHHC12
4.6557e-11	0.404685	0.689	0.338	1.63974e-06	Proliferating	RAB11A
7.5307e-44	0.40467	0.328	0.017	2.65231e-39	Proliferating	ERCC6L
4.27823e-09	0.404596	0.967	0.766	0.000150679	Proliferating	MSN
1.6216e-07	0.40452	0.475	0.221	0.00571128	Proliferating	MESD
3.40618e-09	0.404135	0.623	0.314	0.000119966	Proliferating	CBFB
3.26848e-05	0.403966	0.82	0.625	1	Proliferating	HSPE1
2.11289e-10	0.403959	0.787	0.414	7.44161e-06	Proliferating	STUB1
1.39961e-08	0.403413	0.844	0.533	0.000492942	Proliferating	SRI
1.76612e-06	0.403209	0.861	0.623	0.0622026	Proliferating	HP1BP3
4.93807e-21	0.403201	0.451	0.105	1.73919e-16	Proliferating	MTHFD1
2.90656e-15	0.403114	0.41	0.119	1.02369e-10	Proliferating	MSH2
4.94316e-10	0.403075	0.803	0.475	1.74098e-05	Proliferating	NUDC
1.11387e-17	0.401934	0.311	0.064	3.92306e-13	Proliferating	SLC16A4
3.16521e-13	0.401883	0.648	0.27	1.11479e-08	Proliferating	LPGAT1
1.52411e-10	0.401286	0.803	0.446	5.36791e-06	Proliferating	PPM1G
7.5193e-11	0.4011	0.721	0.351	2.6483e-06	Proliferating	GMPS
2.36772e-14	0.400938	0.492	0.163	8.33912e-10	Proliferating	DNAJC21
1.03699e-08	0.4008	0.508	0.243	0.000365229	Proliferating	LOC716589
1.37024e-42	0.40031	0.262	0.007	4.826e-38	Proliferating	BUB1
5.44775e-09	0.399381	0.885	0.599	0.00019187	Proliferating	SPCS2
3.77395e-10	0.399264	0.828	0.48	1.32919e-05	Proliferating	PSMA6
1.85993e-11	0.398058	0.656	0.302	6.55067e-07	Proliferating	TACC1
2.26219e-06	0.397746	0.607	0.338	0.0796745	Proliferating	TMEM14C
1.82454e-18	0.397705	0.344	0.075	6.42604e-14	Proliferating	SAC3D1
2.57921e-09	0.397094	0.295	0.103	9.08396e-05	Proliferating	LOC697721
2.75249e-10	0.396814	0.541	0.231	9.69426e-06	Proliferating	IL18
1.91328e-09	0.396561	0.959	0.853	6.73856e-05	Proliferating	ARPC3
1.53651e-13	0.396232	0.533	0.199	5.41159e-09	Proliferating	LOC712324
2.17457e-12	0.395853	0.697	0.299	7.65884e-08	Proliferating	ARL6IP6
0.000664437	0.394958	0.803	0.527	1	Proliferating	GHITM
4.19958e-13	0.394732	0.475	0.163	1.47909e-08	Proliferating	CCDC88A
1.43735e-11	0.394531	0.672	0.309	5.06234e-07	Proliferating	JPT1
9.6329e-28	0.39439	0.352	0.049	3.39271e-23	Proliferating	LRR1
3.72277e-10	0.39429	0.738	0.407	1.31116e-05	Proliferating	EIF4A3
5.53372e-10	0.393946	0.844	0.467	1.94898e-05	Proliferating	LSM6
1.59588e-07	0.393229	0.828	0.521	0.0056207	Proliferating	BSG
1.30387e-11	0.392908	0.697	0.306	4.59223e-07	Proliferating	VDAC1
7.19158e-08	0.392429	0.926	0.68	0.00253288	Proliferating	LRRC8C
9.0163e-12	0.392415	0.738	0.356	3.17554e-07	Proliferating	DPY30
5.13277e-07	0.391919	0.967	0.812	0.0180776	Proliferating	IQGAP2
2.64678e-09	0.39091	0.943	0.738	9.32197e-05	Proliferating	SRSF3
2.96647e-16	0.390546	0.451	0.133	1.04479e-11	Proliferating	PTS
8.89443e-13	0.390479	0.607	0.246	3.13262e-08	Proliferating	IL7
2.44785e-08	0.39022	0.77	0.443	0.000862134	Proliferating	UQCRC1
2.23192e-10	0.390102	0.779	0.395	7.86082e-06	Proliferating	MAPRE1
4.19961e-14	0.389563	0.492	0.17	1.4791e-09	Proliferating	SRBD1
1.72624e-53	0.389131	0.295	0.003	6.07983e-49	Proliferating	E2F7
8.4814e-10	0.388453	0.68	0.317	2.98715e-05	Proliferating	TRAPPC1
1.12963e-06	0.388421	0.746	0.479	0.0397854	Proliferating	ATP9B
4.54704e-09	0.387389	0.697	0.337	0.000160147	Proliferating	ADRM1
5.62451e-10	0.387303	0.869	0.521	1.98095e-05	Proliferating	ARF6
7.05176e-10	0.387082	0.795	0.402	2.48363e-05	Proliferating	POMP
1.16972e-13	0.386863	0.533	0.197	4.11974e-09	Proliferating	POLR3K
3.14524e-25	0.386601	0.311	0.042	1.10775e-20	Proliferating	LOC696808
8.85314e-11	0.385645	0.59	0.255	3.11808e-06	Proliferating	C7H15orf61
3.50812e-11	0.385309	0.705	0.34	1.23556e-06	Proliferating	VPS29
1.1993e-08	0.385094	0.959	0.537	0.000422394	Proliferating	CST7
1.69771e-10	0.384916	0.754	0.381	5.97935e-06	Proliferating	BCL7C
5.05762e-24	0.38435	0.41	0.078	1.78129e-19	Proliferating	LOC711440
5.34851e-06	0.384272	0.959	0.769	0.188375	Proliferating	CLEC2D
3.85857e-07	0.384044	0.418	0.2	0.0135899	Proliferating	MAMU-DQA1
2.4676e-08	0.384041	0.926	0.63	0.00086909	Proliferating	PTPRJ
7.27272e-10	0.383491	0.672	0.34	2.56145e-05	Proliferating	HMGA1
8.21521e-16	0.383136	0.672	0.249	2.8934e-11	Proliferating	C16H17orf49
1.32181e-38	0.382982	0.262	0.01	4.65542e-34	Proliferating	LOC705469
9.2264e-08	0.382867	0.951	0.886	0.00324954	Proliferating	CORO1A
4.75348e-08	0.382228	0.787	0.408	0.00167418	Proliferating	LMAN2
3.17801e-11	0.382085	0.689	0.326	1.1193e-06	Proliferating	LSM5
5.61137e-44	0.381822	0.254	0.005	1.97632e-39	Proliferating	CENPQ
1.20752e-11	0.3817	0.639	0.28	4.25288e-07	Proliferating	GLMN
3.9026e-08	0.381514	0.844	0.534	0.00137449	Proliferating	AP2M1
2.30598e-15	0.381337	0.336	0.083	8.12166e-11	Proliferating	GPR153
2.05709e-19	0.380726	0.336	0.066	7.24508e-15	Proliferating	RAD18
1.18497e-14	0.380388	0.615	0.229	4.17346e-10	Proliferating	IMMT
6.59957e-10	0.379977	0.803	0.467	2.32437e-05	Proliferating	GNB2
1.92586e-07	0.379556	0.902	0.687	0.00678286	Proliferating	UQCRQ
6.48644e-13	0.379335	0.566	0.222	2.28452e-08	Proliferating	COPS3
7.01781e-09	0.379193	0.77	0.453	0.000247167	Proliferating	CNTRL
7.9343e-20	0.377709	0.352	0.071	2.79446e-15	Proliferating	FSD1L
2.61057e-19	0.377638	0.377	0.085	9.19442e-15	Proliferating	CFAP20
2.41718e-34	0.376949	0.303	0.023	8.5133e-30	Proliferating	SLC1A4
2.67523e-14	0.376867	0.5	0.169	9.42218e-10	Proliferating	CTPS1
1.9173e-50	0.376543	0.287	0.005	6.75272e-46	Proliferating	SHCBP1
5.16056e-14	0.376439	0.672	0.28	1.81755e-09	Proliferating	BLVRB
2.671e-11	0.376411	0.336	0.109	9.40728e-07	Proliferating	CEP57L1
9.46961e-08	0.376272	0.811	0.517	0.0033352	Proliferating	NSMCE2
6.8179e-08	0.375903	0.918	0.74	0.00240127	Proliferating	ATP5ME
7.65441e-11	0.375796	0.664	0.304	2.69588e-06	Proliferating	ILF2
2.32916e-10	0.375579	0.713	0.345	8.20331e-06	Proliferating	AKR1A1
6.48842e-10	0.37529	0.73	0.351	2.28522e-05	Proliferating	PIN1
1.50543e-10	0.375271	0.484	0.188	5.30213e-06	Proliferating	APOL5
3.94739e-11	0.374722	0.877	0.489	1.39027e-06	Proliferating	PSMA1
4.87915e-13	0.373847	0.434	0.148	1.71844e-08	Proliferating	SMS
3.21545e-05	0.372822	0.623	0.408	1	Proliferating	ELP4
1.21969e-22	0.371981	0.352	0.063	4.29575e-18	Proliferating	RFC2
7.45715e-12	0.371205	0.451	0.163	2.62641e-07	Proliferating	DLD
2.25093e-08	0.371099	0.336	0.127	0.000792778	Proliferating	PRPS2
8.87999e-08	0.370803	0.73	0.411	0.00312753	Proliferating	MAP4
2.31416e-22	0.370765	0.352	0.061	8.15046e-18	Proliferating	GGH
1.08382e-06	0.370714	0.926	0.728	0.0381723	Proliferating	LOC707227
7.91941e-15	0.370188	0.459	0.141	2.78922e-10	Proliferating	DPM2
1.41959e-10	0.369844	0.795	0.408	4.99978e-06	Proliferating	ACTB
2.94712e-07	0.369525	0.607	0.328	0.0103798	Proliferating	CHD9
6.50327e-08	0.368938	0.73	0.407	0.00229045	Proliferating	MRPL20
2.31866e-13	0.368648	0.377	0.112	8.16633e-09	Proliferating	FOXD1
1.88759e-08	0.368401	0.697	0.373	0.000664811	Proliferating	ERGIC2
4.30901e-23	0.367519	0.434	0.092	1.51763e-18	Proliferating	TADA2A
9.62762e-12	0.366984	0.41	0.146	3.39085e-07	Proliferating	POLR3H
3.59464e-06	0.366819	0.467	0.235	0.126603	Proliferating	IL12RB2
1.45119e-12	0.36661	0.344	0.1	5.1111e-08	Proliferating	TOX2
1.45153e-07	0.366605	0.779	0.459	0.00511229	Proliferating	ATOX1
1.99833e-11	0.36656	0.656	0.287	7.03813e-07	Proliferating	HTATSF1
9.63628e-10	0.365806	0.344	0.118	3.3939e-05	Proliferating	AP1B1
2.13323e-08	0.365077	0.5	0.239	0.000751322	Proliferating	LOC701439
6.39758e-07	0.365039	0.73	0.47	0.0225323	Proliferating	CTCF
2.2487e-11	0.363547	0.549	0.221	7.91993e-07	Proliferating	GPATCH11
1.48333e-12	0.363473	0.533	0.199	5.2243e-08	Proliferating	LOC106995333
2.74841e-09	0.363279	0.631	0.316	9.6799e-05	Proliferating	SLF1
8.87536e-09	0.363072	0.779	0.452	0.00031259	Proliferating	MYO5A
3.30938e-11	0.36274	0.664	0.301	1.16556e-06	Proliferating	NAA10
2.10385e-07	0.362259	0.918	0.711	0.00740977	Proliferating	ARPC5
1.98626e-35	0.362081	0.27	0.015	6.99561e-31	Proliferating	CENPA
2.68736e-08	0.361736	0.828	0.552	0.000946487	Proliferating	DDOST
1.52156e-33	0.361121	0.27	0.017	5.35894e-29	Proliferating	ORC1
1.84074e-07	0.360952	0.893	0.65	0.00648307	Proliferating	CD47
1.87442e-08	0.360801	0.91	0.605	0.000660172	Proliferating	SRRM1
7.42585e-16	0.360413	0.328	0.078	2.61538e-11	Proliferating	LOC699195
2.37628e-06	0.360166	0.934	0.673	0.0836925	Proliferating	TMEM59
1.40328e-09	0.360159	0.508	0.231	4.94236e-05	Proliferating	NUP205
3.63696e-07	0.36015	0.787	0.501	0.0128094	Proliferating	CWC15
5.45517e-44	0.359359	0.27	0.007	1.92131e-39	Proliferating	KIF24
1.01779e-14	0.359298	0.434	0.132	3.58467e-10	Proliferating	TCIRG1
1.26715e-10	0.359122	0.369	0.131	4.4629e-06	Proliferating	SLC11A1
4.21167e-05	0.359091	0.418	0.234	1	Proliferating	CDKN2D
4.99144e-10	0.359052	0.615	0.298	1.75799e-05	Proliferating	GTF3C6
0.000181167	0.358481	0.648	0.389	1	Proliferating	POLR2F
6.43061e-08	0.358376	0.885	0.644	0.00226486	Proliferating	XRCC6
1.28744e-10	0.358271	0.541	0.228	4.53435e-06	Proliferating	HIP1
8.07658e-10	0.358015	0.516	0.228	2.84457e-05	Proliferating	UBE2E3
1.79873e-19	0.357166	0.393	0.088	6.33513e-15	Proliferating	ACTL6A
5.77192e-11	0.357142	0.557	0.232	2.03287e-06	Proliferating	TMX1
1.046e-10	0.357113	0.443	0.169	3.684e-06	Proliferating	MT1M
5.34446e-08	0.357052	0.803	0.44	0.00188232	Proliferating	ENY2
1.61756e-13	0.356777	0.402	0.123	5.69705e-09	Proliferating	UBR7
4.81007e-07	0.356196	0.402	0.181	0.0169411	Proliferating	FRY
9.51518e-09	0.356178	0.697	0.351	0.000335125	Proliferating	COX19
6.6382e-09	0.355294	0.402	0.165	0.000233797	Proliferating	MAMU-DRB5
7.73423e-13	0.355001	0.525	0.191	2.72399e-08	Proliferating	MAMU-DQB1
1.13822e-08	0.354535	0.336	0.122	0.00040088	Proliferating	FABP5
1.79473e-09	0.354393	0.631	0.304	6.32103e-05	Proliferating	PFKP
6.2159e-11	0.354244	0.68	0.314	2.18924e-06	Proliferating	RBBP4
2.36602e-16	0.353723	0.352	0.085	8.33311e-12	Proliferating	SQLE
4.91423e-08	0.352945	0.754	0.433	0.00173079	Proliferating	HDAC1
4.28823e-14	0.35291	0.672	0.262	1.51031e-09	Proliferating	CD58
0.000118153	0.352704	0.893	0.673	1	Proliferating	PRKCA
5.95285e-07	0.35249	0.787	0.483	0.0209659	Proliferating	COX5A
9.38399e-07	0.352404	0.811	0.526	0.0330504	Proliferating	ASCC3
2.25232e-21	0.352386	0.311	0.051	7.93269e-17	Proliferating	CGAS
1.4465e-07	0.352053	0.869	0.546	0.00509456	Proliferating	MICU2
2.25414e-15	0.351978	0.426	0.125	7.93907e-11	Proliferating	EXOSC8
2.90458e-10	0.351777	0.541	0.234	1.02299e-05	Proliferating	LOC106998762
2.65112e-06	0.351322	0.516	0.272	0.0933723	Proliferating	SLC10A7
5.23401e-11	0.351302	0.648	0.298	1.84342e-06	Proliferating	ATL3
1.10211e-24	0.350594	0.328	0.048	3.88164e-20	Proliferating	CEP85
5.24886e-07	0.350107	0.738	0.452	0.0184865	Proliferating	ELF2
0.000308469	0.348894	0.451	0.285	1	Proliferating	ULK4
1.94879e-14	0.348833	0.451	0.144	6.86364e-10	Proliferating	RGS3
8.23691e-49	0.348819	0.262	0.002	2.90104e-44	Proliferating	DSCC1
7.53182e-07	0.348586	0.828	0.513	0.0265271	Proliferating	LOC106992647
3.51259e-14	0.348376	0.443	0.139	1.23713e-09	Proliferating	ERI1
7.50257e-09	0.348313	0.475	0.199	0.00026424	Proliferating	EMSY
1.31013e-11	0.348253	0.566	0.225	4.61427e-07	Proliferating	NELFB
2.33051e-17	0.346765	0.418	0.109	8.20804e-13	Proliferating	RETREG2
1.20684e-11	0.34666	0.475	0.178	4.25048e-07	Proliferating	MCRIP1
4.27379e-20	0.34661	0.352	0.07	1.50523e-15	Proliferating	APOBEC3D
1.37973e-07	0.346228	0.828	0.527	0.00485943	Proliferating	FKBP1A
2.12203e-17	0.345667	0.418	0.11	7.4738e-13	Proliferating	RNF168
2.48206e-08	0.345594	0.607	0.314	0.000874181	Proliferating	LOC100427957
7.82553e-07	0.345555	0.746	0.484	0.0275615	Proliferating	NDUFA6
1.52446e-07	0.34478	0.631	0.341	0.00536915	Proliferating	KATNBL1
3.69912e-11	0.344702	0.631	0.282	1.30283e-06	Proliferating	PANK2
5.10693e-09	0.344504	0.73	0.425	0.000179866	Proliferating	LOC713572
7.9789e-18	0.344068	0.393	0.096	2.81017e-13	Proliferating	CLN6
5.23253e-10	0.343756	0.59	0.262	1.8429e-05	Proliferating	RASGEF1A
4.53205e-06	0.343754	0.623	0.351	0.159619	Proliferating	MAPK14
5.98783e-11	0.342972	0.467	0.184	2.10891e-06	Proliferating	NEDD4
9.3605e-11	0.342768	0.574	0.247	3.29677e-06	Proliferating	HNRNPUL2
2.20014e-07	0.342756	0.705	0.414	0.0077489	Proliferating	DNAJC8
1.50107e-06	0.342604	0.967	0.839	0.0528678	Proliferating	ATP5F1D
1.73855e-09	0.342374	0.73	0.387	6.12316e-05	Proliferating	RPN2
1.00577e-07	0.341664	0.959	0.773	0.00354234	Proliferating	ACTR3
5.58024e-06	0.340722	0.467	0.233	0.196536	Proliferating	CNIH1
2.14891e-10	0.34016	0.5	0.205	7.56844e-06	Proliferating	ZCCHC17
2.19002e-11	0.339755	0.533	0.217	7.71325e-07	Proliferating	HPSE
1.00485e-12	0.33943	0.492	0.175	3.53908e-08	Proliferating	TP53
2.28976e-17	0.339254	0.566	0.173	8.06452e-13	Proliferating	CMA1
1.22831e-18	0.338915	0.352	0.075	4.32612e-14	Proliferating	SFR1
5.5699e-12	0.338203	0.475	0.175	1.96172e-07	Proliferating	HIVEP3
8.47283e-08	0.338133	0.803	0.467	0.00298413	Proliferating	RER1
1.36709e-12	0.337325	0.402	0.13	4.8149e-08	Proliferating	RDX
1.72245e-16	0.33673	0.492	0.147	6.06648e-12	Proliferating	MSH6
5.16247e-16	0.33619	0.549	0.174	1.81822e-11	Proliferating	MATK
3.3518e-12	0.335984	0.336	0.1	1.1805e-07	Proliferating	LOC708492
5.01241e-07	0.335839	0.844	0.525	0.0176537	Proliferating	TMEM160
2.67749e-11	0.335599	0.336	0.104	9.43013e-07	Proliferating	TXNDC16
4.08711e-13	0.335474	0.475	0.16	1.43948e-08	Proliferating	KEAP1
4.78614e-08	0.33546	0.566	0.265	0.00168568	Proliferating	MRPL52
3.57343e-06	0.335456	0.861	0.541	0.125856	Proliferating	TCEA1
9.90911e-09	0.335005	0.82	0.466	0.000348999	Proliferating	SLC9A3R1
5.08576e-13	0.333992	0.361	0.105	1.7912e-08	Proliferating	THOC6
2.05066e-06	0.333908	0.721	0.432	0.0722242	Proliferating	SLK
3.60546e-15	0.333822	0.426	0.123	1.26984e-10	Proliferating	PRDX4
8.80059e-08	0.333552	0.803	0.498	0.00309957	Proliferating	NDUFC2
4.39781e-12	0.333541	0.623	0.249	1.54891e-07	Proliferating	PHB
1.87178e-06	0.333147	0.68	0.394	0.0659241	Proliferating	GNAQ
2.24228e-10	0.333139	0.574	0.25	7.8973e-06	Proliferating	ASB8
2.20023e-09	0.33298	0.484	0.205	7.74919e-05	Proliferating	CRYL1
1.22173e-06	0.332749	0.885	0.613	0.0430294	Proliferating	SEM1
1.9147e-05	0.332616	0.459	0.254	0.674359	Proliferating	ZNF438
2.52138e-14	0.332077	0.721	0.286	8.8803e-10	Proliferating	ODC1
2.12425e-08	0.33159	0.779	0.431	0.000748162	Proliferating	ATP5F1C
8.32452e-08	0.331461	0.672	0.377	0.0029319	Proliferating	PTBP1
8.51774e-19	0.331431	0.287	0.05	2.99995e-14	Proliferating	PASK
5.46273e-07	0.331261	0.787	0.457	0.0192397	Proliferating	RAD23A
2.21341e-15	0.331097	0.32	0.075	7.79562e-11	Proliferating	FN3KRP
8.34435e-10	0.330849	0.697	0.336	2.93888e-05	Proliferating	PTPMT1
7.18017e-07	0.330588	0.639	0.336	0.0252886	Proliferating	MYO9A
2.86907e-06	0.329516	0.91	0.756	0.101049	Proliferating	GSTP1
7.41129e-44	0.329269	0.262	0.006	2.61025e-39	Proliferating	E2F2
6.06085e-10	0.329265	0.705	0.343	2.13463e-05	Proliferating	MRPS15
1.54469e-11	0.328896	0.311	0.092	5.44038e-07	Proliferating	CPNE4
1.68443e-05	0.328257	0.934	0.74	0.593256	Proliferating	PSMB8
2.27398e-07	0.328225	0.943	0.732	0.00800897	Proliferating	NDUFA1
2.96236e-07	0.328223	0.369	0.149	0.0104334	Proliferating	DNAJC5
8.07756e-09	0.328223	0.393	0.16	0.000284492	Proliferating	GALK1
7.65522e-09	0.327948	0.697	0.352	0.000269617	Proliferating	AURKAIP1
1.66534e-10	0.327846	0.525	0.219	5.86533e-06	Proliferating	SPTSSA
2.10253e-08	0.327447	0.451	0.194	0.000740512	Proliferating	RCN2
1.51594e-08	0.327319	0.623	0.315	0.000533916	Proliferating	TRIM28
2.44218e-20	0.327069	0.369	0.076	8.60137e-16	Proliferating	DDB2
1.77289e-08	0.326525	0.77	0.415	0.000624411	Proliferating	ATP5MC1
7.2567e-08	0.326447	0.943	0.694	0.00255581	Proliferating	FLNA
8.71339e-05	0.32627	0.967	0.827	1	Proliferating	ADORA2B
1.32487e-07	0.326157	0.91	0.663	0.00466619	Proliferating	NDUFB4
1.78163e-05	0.32604	0.5	0.275	0.627491	Proliferating	MCU
7.61934e-06	0.325553	0.311	0.148	0.268353	Proliferating	BICD1
1.99562e-05	0.325355	0.738	0.486	0.702857	Proliferating	NDUFA7
5.3956e-09	0.324971	0.598	0.29	0.000190033	Proliferating	DHX15
2.05575e-09	0.324667	0.59	0.278	7.24036e-05	Proliferating	PSMB2
8.98804e-20	0.323346	0.254	0.036	3.16559e-15	Proliferating	PHLDA3
4.71993e-11	0.323298	0.549	0.217	1.66236e-06	Proliferating	SETD3
0.000578219	0.32321	0.82	0.63	1	Proliferating	CAMK1D
5.60015e-07	0.323139	0.689	0.373	0.0197237	Proliferating	UBA2
3.39627e-47	0.323131	0.27	0.005	1.19617e-42	Proliferating	TRIP13
2.28728e-16	0.323013	0.295	0.06	8.05581e-12	Proliferating	YEATS4
5.22569e-09	0.323004	0.713	0.397	0.000184049	Proliferating	MAGOH
1.61045e-07	0.32269	0.943	0.761	0.005672	Proliferating	CAPZA1
2.24161e-10	0.322497	0.656	0.304	7.89494e-06	Proliferating	OTULIN
3.29192e-06	0.322442	0.91	0.73	0.115941	Proliferating	ROMO1
4.19548e-06	0.322317	0.525	0.283	0.147765	Proliferating	BTBD10
1.38358e-08	0.321949	0.475	0.212	0.000487297	Proliferating	MCPH1
1.09384e-17	0.321873	0.303	0.06	3.85251e-13	Proliferating	PPIL1
2.03598e-10	0.321791	0.418	0.156	7.17074e-06	Proliferating	HSPB11
1.35667e-06	0.321779	0.443	0.224	0.047782	Proliferating	PLEKHA5
1.75363e-06	0.32147	0.705	0.374	0.0617628	Proliferating	NDUFAB1
2.49308e-08	0.321278	0.639	0.326	0.000878063	Proliferating	USP48
2.37393e-11	0.321019	0.385	0.13	8.36099e-07	Proliferating	TTC21B
3.90152e-14	0.32093	0.287	0.066	1.37412e-09	Proliferating	CEP89
2.61097e-12	0.320836	0.697	0.299	9.19582e-08	Proliferating	CLTB
8.83228e-08	0.320653	0.721	0.384	0.00311073	Proliferating	MRPS16
2.6721e-12	0.320369	0.459	0.154	9.41115e-08	Proliferating	BLOC1S5
8.5813e-12	0.3203	0.541	0.211	3.02233e-07	Proliferating	SLF2
5.58561e-17	0.320274	0.467	0.127	1.96725e-12	Proliferating	STT3A
4.75648e-06	0.32003	0.877	0.605	0.167523	Proliferating	OSTF1
9.00034e-06	0.319814	0.746	0.489	0.316992	Proliferating	FUT8
3.43089e-10	0.319709	0.582	0.251	1.20836e-05	Proliferating	PAXX
3.9581e-20	0.319613	0.361	0.072	1.39404e-15	Proliferating	LRRC42
1.73157e-18	0.31936	0.508	0.141	6.09859e-14	Proliferating	MTHFD2
2.74874e-05	0.319043	0.82	0.584	0.968106	Proliferating	WDR70
1.14698e-09	0.318736	0.615	0.291	4.03968e-05	Proliferating	NOP56
2.2483e-07	0.318047	0.656	0.399	0.0079185	Proliferating	STRN
4.6502e-10	0.317888	0.361	0.129	1.6378e-05	Proliferating	VPS45
2.4772e-08	0.3175	0.82	0.473	0.000872468	Proliferating	CPD
3.1458e-13	0.317285	0.557	0.2	1.10795e-08	Proliferating	CENPB
3.42466e-06	0.316705	0.795	0.559	0.120617	Proliferating	CFDP1
2.09311e-06	0.316504	0.975	0.902	0.0737194	Proliferating	ARPC1B
8.46553e-05	0.316191	0.943	0.784	1	Proliferating	TMA7
2.2336e-13	0.316107	0.459	0.151	7.86674e-09	Proliferating	MLEC
2.43164e-07	0.316035	0.77	0.453	0.00856424	Proliferating	OPTN
7.14621e-07	0.315556	0.705	0.399	0.0251689	Proliferating	SEPTIN2
2.46063e-09	0.315549	0.385	0.146	8.66633e-05	Proliferating	FAM210B
1.14766e-08	0.315228	0.467	0.204	0.000404205	Proliferating	PPM1D
9.0287e-08	0.314931	0.672	0.356	0.00317991	Proliferating	PI4K2B
2.31599e-06	0.314699	0.762	0.477	0.0815693	Proliferating	ATP6V1F
9.36254e-13	0.314457	0.566	0.216	3.29749e-08	Proliferating	SAR1A
0.000515415	0.314237	0.803	0.52	1	Proliferating	RTF1
2.57991e-05	0.313967	0.508	0.264	0.908645	Proliferating	EIF2S1
3.0267e-06	0.31328	0.393	0.178	0.106601	Proliferating	SRRT
1.01713e-14	0.312935	0.344	0.089	3.58233e-10	Proliferating	VEGFB
2.15632e-06	0.312832	0.885	0.688	0.0759456	Proliferating	THRAP3
0.00010941	0.312588	0.91	0.729	1	Proliferating	SLIRP
1.10497e-16	0.312489	0.41	0.108	3.8917e-12	Proliferating	SLX1A
2.01557e-05	0.312424	0.918	0.757	0.709885	Proliferating	LOC114669847
1.75211e-25	0.31241	0.303	0.038	6.17094e-21	Proliferating	DNA2
3.23277e-16	0.31224	0.41	0.11	1.13858e-11	Proliferating	RHNO1
3.32708e-11	0.31208	0.385	0.136	1.1718e-06	Proliferating	LOC707459
5.14456e-11	0.311897	0.5	0.198	1.81191e-06	Proliferating	CISD2
1.71991e-07	0.311364	0.631	0.326	0.00605753	Proliferating	KLHDC2
1.38772e-15	0.310927	0.287	0.06	4.88756e-11	Proliferating	CHAC2
1.17969e-06	0.310859	0.336	0.139	0.0415487	Proliferating	UBL4A
2.30606e-08	0.310393	0.721	0.367	0.000812193	Proliferating	PSMD4
1.0573e-11	0.309965	0.459	0.165	3.7238e-07	Proliferating	PCYT2
4.41482e-11	0.309116	0.533	0.217	1.5549e-06	Proliferating	PSMC3
2.64488e-08	0.309045	0.746	0.411	0.000931527	Proliferating	KPNB1
2.18526e-16	0.308594	0.303	0.064	7.69649e-12	Proliferating	LOC711523
1.85641e-06	0.308548	0.82	0.568	0.0653826	Proliferating	BRK1
3.9417e-06	0.308241	0.648	0.363	0.138827	Proliferating	CDC5L
1.15092e-08	0.308205	0.713	0.375	0.000405353	Proliferating	ABCF1
1.12806e-08	0.30772	0.607	0.282	0.000397302	Proliferating	PPIH
8.52384e-07	0.307665	0.779	0.438	0.030021	Proliferating	LOC705095
4.07044e-37	0.307633	0.254	0.01	1.43361e-32	Proliferating	DHFR
1.57563e-09	0.307586	0.516	0.228	5.54936e-05	Proliferating	GLE1
3.44718e-07	0.307067	0.402	0.176	0.012141	Proliferating	UBXN2A
9.25585e-06	0.306866	0.984	0.897	0.325991	Proliferating	RABGAP1L
3.43933e-06	0.306844	0.582	0.337	0.121133	Proliferating	LARP7
3.38534e-08	0.306736	0.525	0.249	0.00119232	Proliferating	PPP1R14B
3.39823e-08	0.306707	0.525	0.24	0.00119686	Proliferating	EEFSEC
2.59132e-16	0.306621	0.27	0.051	9.12662e-12	Proliferating	CHPT1
1.29885e-06	0.306616	0.795	0.492	0.0457456	Proliferating	GRK5
1.89727e-13	0.306536	0.41	0.126	6.68218e-09	Proliferating	LMF2
2.90675e-07	0.306205	0.803	0.546	0.0102376	Proliferating	TPR
3.65421e-08	0.306049	0.623	0.313	0.00128701	Proliferating	DAZAP1
2.02148e-10	0.305705	0.738	0.36	7.11964e-06	Proliferating	ARRB2
1.77274e-06	0.305663	0.926	0.633	0.062436	Proliferating	ATP2B4
3.03922e-05	0.304496	0.328	0.159	1	Proliferating	CMSS1
8.48899e-06	0.304447	0.549	0.312	0.298982	Proliferating	LOC694064
1.2534e-23	0.304242	0.27	0.032	4.41448e-19	Proliferating	CHEK2
1.10949e-43	0.304191	0.303	0.013	3.90761e-39	Proliferating	SLC25A10
2.37477e-07	0.304081	0.451	0.213	0.00836396	Proliferating	OSBPL11
7.79057e-16	0.303907	0.426	0.116	2.74384e-11	Proliferating	GUSBA
5.00968e-09	0.3039	0.402	0.156	0.000176441	Proliferating	FRG1-1
4.85823e-07	0.3034	0.738	0.44	0.0171107	Proliferating	SNTB1
2.88775e-10	0.303102	0.5	0.2	1.01707e-05	Proliferating	AIDA
1.94789e-08	0.302913	0.393	0.158	0.000686047	Proliferating	ACAP3
7.98544e-06	0.302879	0.738	0.441	0.281247	Proliferating	GMCL1
8.51992e-08	0.302852	0.574	0.273	0.00300071	Proliferating	UBE2M
1.85332e-05	0.302784	0.967	0.881	0.652741	Proliferating	MYL6
1.5065e-10	0.302657	0.418	0.152	5.3059e-06	Proliferating	RFX2
9.10847e-11	0.302621	0.533	0.207	3.208e-06	Proliferating	FOXRED1
2.31343e-11	0.302545	0.574	0.239	8.14791e-07	Proliferating	FAM102B
3.02792e-13	0.302378	0.574	0.211	1.06643e-08	Proliferating	RTTN
1.06817e-06	0.302268	0.467	0.235	0.0376208	Proliferating	C2CD5
1.47627e-10	0.302219	0.549	0.225	5.19941e-06	Proliferating	LOC106994675
2.03607e-08	0.302188	0.598	0.287	0.000717103	Proliferating	MRPL27
5.63009e-08	0.301854	0.631	0.319	0.00198292	Proliferating	FNTA
1.26844e-06	0.301842	0.754	0.476	0.0446743	Proliferating	TMOD3
9.48384e-08	0.301408	0.754	0.401	0.00334021	Proliferating	SPCS3
4.86632e-13	0.301324	0.549	0.2	1.71392e-08	Proliferating	LCLAT1
2.70858e-20	0.301281	0.32	0.056	9.53963e-16	Proliferating	HAUS8
4.41906e-12	0.301114	0.352	0.109	1.55639e-07	Proliferating	DPYSL2
9.90862e-08	0.300934	0.82	0.472	0.00348982	Proliferating	DYM
2.43405e-06	0.300864	0.902	0.694	0.0857274	Proliferating	PSMB1
4.85357e-08	0.300832	0.541	0.258	0.00170943	Proliferating	SFMBT1
6.92616e-09	0.300783	0.713	0.377	0.000243939	Proliferating	SNTB2
5.65026e-08	0.300547	0.615	0.311	0.00199002	Proliferating	PSENEN
7.13499e-05	0.299867	0.467	0.271	1	Proliferating	SP4
5.34756e-05	0.299788	0.32	0.151	1	Proliferating	PHB2
1.67078e-06	0.29937	0.746	0.461	0.0588447	Proliferating	DRAP1
7.54621e-06	0.299309	0.934	0.876	0.265778	Proliferating	ATP5MG
1.74864e-19	0.298906	0.328	0.061	6.1587e-15	Proliferating	DPF3
1.00537e-13	0.298579	0.402	0.117	3.54093e-09	Proliferating	PTPA
1.49074e-06	0.29844	0.557	0.285	0.0525038	Proliferating	SLX4IP
5.39458e-07	0.298139	0.533	0.269	0.0189997	Proliferating	TIMP1
1.20145e-10	0.297616	0.598	0.248	4.2315e-06	Proliferating	CEP295
2.33211e-14	0.297355	0.418	0.124	8.21369e-10	Proliferating	CREBZF
3.94775e-11	0.297238	0.41	0.146	1.3904e-06	Proliferating	SETBP1
3.81432e-11	0.296763	0.41	0.146	1.34341e-06	Proliferating	BBS7
7.66565e-08	0.296573	0.295	0.11	0.00269984	Proliferating	CCDC7
3.25502e-07	0.296366	0.656	0.35	0.0114642	Proliferating	MT2A
1.20172e-11	0.295969	0.311	0.09	4.23245e-07	Proliferating	WRAP53
2.87026e-07	0.295951	0.787	0.443	0.0101091	Proliferating	ATP5PB
1.54106e-11	0.295413	0.385	0.126	5.4276e-07	Proliferating	NUBP1
3.29717e-08	0.29477	0.607	0.298	0.00116126	Proliferating	NAPA
3.80691e-06	0.294724	0.385	0.174	0.134079	Proliferating	RNASE4
2.21865e-08	0.294689	0.721	0.37	0.000781408	Proliferating	CANX
6.65746e-10	0.294684	0.426	0.161	2.34476e-05	Proliferating	ALOX5AP
7.88611e-10	0.294003	0.443	0.17	2.77749e-05	Proliferating	VMA21
1.24813e-08	0.293757	0.557	0.25	0.000439591	Proliferating	HSBP1
1.20485e-07	0.293731	0.967	0.735	0.00424349	Proliferating	U2AF1
5.69818e-08	0.293414	0.672	0.337	0.0020069	Proliferating	CSK
1.31328e-07	0.292891	0.697	0.386	0.00462536	Proliferating	TAP1
8.20378e-05	0.292817	0.893	0.824	1	Proliferating	COX6C
6.69481e-07	0.292466	0.689	0.374	0.0235791	Proliferating	MANF
3.22345e-07	0.291161	0.582	0.284	0.011353	Proliferating	SHARPIN
6.56626e-13	0.291154	0.385	0.118	2.31264e-08	Proliferating	COMTD1
4.84018e-05	0.290974	0.721	0.46	1	Proliferating	DGKZ
1.85308e-11	0.290585	0.566	0.221	6.52655e-07	Proliferating	MRPS27
3.09052e-07	0.290566	0.508	0.247	0.0108848	Proliferating	RNF144A
2.4005e-07	0.290441	0.713	0.39	0.00845455	Proliferating	KCNAB2
4.60634e-17	0.290254	0.295	0.058	1.62235e-12	Proliferating	C15H9orf40
2.98286e-11	0.29022	0.402	0.138	1.05056e-06	Proliferating	FOPNL
8.47683e-14	0.290164	0.32	0.081	2.98554e-09	Proliferating	DPY19L1
3.29663e-10	0.290008	0.369	0.129	1.16107e-05	Proliferating	PLCG2
5.45188e-07	0.289941	0.607	0.322	0.0192015	Proliferating	RNPS1
1.24157e-07	0.289441	0.787	0.45	0.00437281	Proliferating	PSMD14
3.07698e-09	0.289194	0.484	0.2	0.000108371	Proliferating	LNPK
2.32825e-06	0.28911	0.697	0.431	0.0820009	Proliferating	LOC701223
1.06213e-07	0.288685	0.967	0.674	0.00374083	Proliferating	DNAJC1
1.01863e-18	0.288605	0.328	0.065	3.5876e-14	Proliferating	LOC717656
3.65825e-05	0.288604	0.811	0.537	1	Proliferating	COX14
3.44674e-11	0.288373	0.32	0.097	1.21394e-06	Proliferating	KATNAL1
2.10281e-09	0.288351	0.574	0.257	7.40609e-05	Proliferating	VEZF1
7.61998e-06	0.288319	0.836	0.564	0.268376	Proliferating	CLTA
5.30869e-07	0.288252	0.951	0.935	0.0186972	Proliferating	SERF2
2.56148e-11	0.288211	0.508	0.198	9.02153e-07	Proliferating	JAKMIP1
4.17543e-09	0.287811	0.639	0.305	0.000147059	Proliferating	ZFP91
4.72608e-09	0.287652	0.451	0.189	0.000166453	Proliferating	UPF3A
2.17583e-10	0.287624	0.541	0.221	7.66328e-06	Proliferating	IAH1
2.03767e-28	0.287315	0.262	0.022	7.17667e-24	Proliferating	SKA1
2.22871e-06	0.287169	0.705	0.415	0.0784951	Proliferating	SCLT1
2.34331e-13	0.287016	0.303	0.076	8.25315e-09	Proliferating	HBA
2.10666e-06	0.286966	0.779	0.467	0.0741967	Proliferating	TXNL4A
1.87418e-06	0.286701	0.68	0.395	0.0660087	Proliferating	PSMA4
1.37531e-11	0.28561	0.369	0.117	4.84385e-07	Proliferating	ZFYVE21
2.03076e-07	0.285315	0.656	0.353	0.00715235	Proliferating	POLR2K
7.08218e-07	0.285136	0.762	0.44	0.0249434	Proliferating	CYC1
7.12364e-12	0.284873	0.385	0.124	2.50895e-07	Proliferating	EIF4EBP1
1.20388e-06	0.284814	0.664	0.346	0.0424008	Proliferating	WASHC3
3.59778e-05	0.284614	0.992	0.898	1	Proliferating	KLF12
9.57022e-09	0.284438	0.426	0.174	0.000337063	Proliferating	MRPL46
0.000265463	0.284263	0.746	0.484	1	Proliferating	EIF5A
1.72347e-05	0.284041	0.902	0.723	0.607007	Proliferating	PET100
2.54904e-08	0.283929	0.443	0.194	0.000897771	Proliferating	POLH
5.09813e-12	0.283892	0.369	0.114	1.79556e-07	Proliferating	KHSRP
4.74238e-16	0.283838	0.32	0.07	1.67027e-11	Proliferating	ETV7
7.65883e-08	0.283644	0.639	0.32	0.00269744	Proliferating	HSD17B10
5.85165e-11	0.283439	0.377	0.125	2.06095e-06	Proliferating	NFYB
1.28995e-06	0.28342	0.393	0.185	0.0454321	Proliferating	NBN
3.11673e-11	0.283297	0.664	0.284	1.09771e-06	Proliferating	NDUFV1
2.58434e-07	0.283283	0.582	0.293	0.00910205	Proliferating	SIN3A
3.61735e-10	0.283205	0.443	0.173	1.27403e-05	Proliferating	EMD
9.17889e-05	0.282701	0.877	0.644	1	Proliferating	KLF3
2.00615e-12	0.282455	0.475	0.17	7.06566e-08	Proliferating	PIGF
3.17406e-08	0.281973	0.516	0.236	0.0011179	Proliferating	NUTF2
1.44144e-09	0.281368	0.623	0.268	5.07676e-05	Proliferating	D2HGDH
1.04834e-10	0.281275	0.525	0.207	3.69225e-06	Proliferating	DCXR
7.29219e-13	0.281141	0.32	0.087	2.56831e-08	Proliferating	C5H4orf46
6.32628e-15	0.28108	0.311	0.073	2.22812e-10	Proliferating	BORA
1.73576e-08	0.281079	0.459	0.195	0.000611335	Proliferating	MAMU-DPB
1.65826e-11	0.280998	0.467	0.173	5.84039e-07	Proliferating	TPGS2
2.06118e-06	0.280741	0.582	0.298	0.0725949	Proliferating	SYPL1
1.18884e-06	0.280695	0.795	0.495	0.0418709	Proliferating	FCHSD2
3.47581e-08	0.280667	0.73	0.384	0.00122418	Proliferating	PSMB3
1.7172e-06	0.28064	0.639	0.357	0.0604796	Proliferating	FERMT3
8.98714e-05	0.280464	0.852	0.665	1	Proliferating	DYNLRB1
4.93347e-08	0.28044	0.557	0.251	0.00173757	Proliferating	MRPL33
1.57197e-05	0.2804	0.352	0.167	0.553647	Proliferating	COPG2
8.24105e-08	0.280116	0.557	0.272	0.0029025	Proliferating	ADCY9
1.1489e-11	0.280048	0.385	0.125	4.04643e-07	Proliferating	KMT5A
1.2135e-05	0.279893	0.779	0.47	0.427395	Proliferating	PSMD8
1.63642e-07	0.279697	0.434	0.199	0.00576347	Proliferating	LOC694417
1.5942e-13	0.279361	0.385	0.112	5.61477e-09	Proliferating	MAGOHB
9.19874e-09	0.278693	0.369	0.144	0.000323979	Proliferating	SPOPL
1.07334e-07	0.278194	0.557	0.268	0.00378032	Proliferating	GLRX3
7.10137e-07	0.277926	0.639	0.36	0.025011	Proliferating	TCERG1
4.07751e-08	0.27784	0.549	0.254	0.0014361	Proliferating	ARL2BP
6.47405e-14	0.277829	0.279	0.064	2.28016e-09	Proliferating	SCLY
0.00197285	0.277099	0.869	0.638	1	Proliferating	EIF4A1
3.48098e-09	0.276988	0.623	0.28	0.0001226	Proliferating	AP1S1
2.48389e-33	0.276815	0.254	0.014	8.74828e-29	Proliferating	ARHGAP33
2.96547e-05	0.276321	0.795	0.593	1	Proliferating	MRPL51
9.75601e-05	0.276184	0.877	0.714	1	Proliferating	LOC720636
1.39405e-10	0.27593	0.475	0.183	4.90984e-06	Proliferating	RCC2
1.57031e-07	0.275578	0.787	0.428	0.00553062	Proliferating	MADD
1.06166e-07	0.274771	0.508	0.242	0.00373916	Proliferating	ESD
7.28868e-06	0.27477	0.352	0.158	0.256707	Proliferating	CEP250
7.43853e-07	0.274267	0.549	0.273	0.0261985	Proliferating	GTF2F2
5.97566e-09	0.273793	0.746	0.379	0.000210463	Proliferating	ACTN4
1.26584e-07	0.273638	0.754	0.404	0.00445828	Proliferating	NDUFS7
1.8077e-07	0.273445	0.557	0.277	0.0063667	Proliferating	PRR5
3.31235e-06	0.273007	0.631	0.359	0.116661	Proliferating	CMC2
6.60288e-06	0.272943	0.787	0.503	0.232554	Proliferating	FAR1
3.2746e-08	0.272489	0.434	0.183	0.00115331	Proliferating	ABHD3
0.00100072	0.272429	0.32	0.173	1	Proliferating	POLB
5.86538e-16	0.272413	0.32	0.072	2.06579e-11	Proliferating	TIMM21
2.34525e-14	0.272185	0.295	0.068	8.25995e-10	Proliferating	MRNIP
3.15315e-06	0.272031	0.795	0.494	0.111054	Proliferating	RAC1
1.0887e-09	0.272019	0.844	0.467	3.8344e-05	Proliferating	ARPC5L
3.92602e-06	0.271813	0.664	0.403	0.138275	Proliferating	MBD2
1.03327e-17	0.271696	0.287	0.053	3.63917e-13	Proliferating	IMPA2
1.81579e-10	0.271159	0.402	0.143	6.39523e-06	Proliferating	FBXO22
5.65897e-06	0.271085	0.746	0.474	0.199309	Proliferating	RBM8A
2.56334e-07	0.27088	0.648	0.358	0.0090281	Proliferating	CSNK2B
5.10832e-15	0.270251	0.369	0.095	1.79915e-10	Proliferating	ERAL1
3.80155e-11	0.270238	0.402	0.138	1.3389e-06	Proliferating	NUP107
0.000947466	0.270156	0.73	0.565	1	Proliferating	RAPGEF2
2.98779e-08	0.269675	0.918	0.519	0.0010523	Proliferating	TNFRSF1B
2.38976e-07	0.269636	0.475	0.228	0.00841674	Proliferating	CTBP1
5.41417e-10	0.269532	0.467	0.183	1.90687e-05	Proliferating	IPO5
8.87643e-05	0.269282	0.795	0.55	1	Proliferating	ARF5
2.18459e-08	0.269228	0.459	0.199	0.000769414	Proliferating	SFXN1
1.54042e-08	0.268692	0.877	0.481	0.000542536	Proliferating	SYTL2
4.7971e-14	0.268577	0.303	0.074	1.68954e-09	Proliferating	BNIP1
6.7283e-09	0.268573	0.352	0.13	0.000236971	Proliferating	PRPF3
1.80769e-13	0.26857	0.336	0.09	6.36668e-09	Proliferating	TOP3A
4.01579e-12	0.268377	0.295	0.08	1.41436e-07	Proliferating	LOC710897
1.24811e-09	0.268303	0.525	0.226	4.39584e-05	Proliferating	SAMD3
2.03509e-07	0.26809	0.467	0.217	0.00716758	Proliferating	SIK2
5.08328e-08	0.267903	0.5	0.22	0.00179033	Proliferating	DMAC1
9.14124e-09	0.267866	0.434	0.177	0.000321954	Proliferating	ARL3
3.29615e-07	0.267618	0.656	0.345	0.011609	Proliferating	SNRNP200
2.79749e-11	0.267147	0.41	0.139	9.85276e-07	Proliferating	MTA2
9.24149e-09	0.266804	0.377	0.151	0.000325485	Proliferating	S100PBP
1.65536e-08	0.26653	0.418	0.171	0.000583018	Proliferating	SPG21
9.84615e-11	0.266487	0.434	0.158	3.46781e-06	Proliferating	DCPS
0.000106052	0.266289	0.549	0.356	1	Proliferating	WRN
0.000770224	0.266239	0.68	0.426	1	Proliferating	SF3B5
9.51518e-07	0.265797	0.844	0.538	0.0335125	Proliferating	LSM4
1.05729e-07	0.265769	0.721	0.374	0.00372378	Proliferating	BCL7B
5.44683e-07	0.265342	0.557	0.272	0.0191837	Proliferating	ELAVL1
7.23774e-06	0.265337	0.631	0.356	0.254913	Proliferating	SEC11C
6.06803e-17	0.265091	0.32	0.067	2.13716e-12	Proliferating	ZW10
1.35443e-09	0.264723	0.434	0.169	4.7703e-05	Proliferating	SFI1
3.95158e-06	0.264376	0.393	0.192	0.139175	Proliferating	KLRG1
1.09692e-06	0.264321	0.656	0.342	0.0386334	Proliferating	PFDN6
4.21644e-10	0.264219	0.508	0.2	1.48503e-05	Proliferating	CDC34
3.27555e-10	0.263166	0.295	0.092	1.15365e-05	Proliferating	SETDB2
3.24109e-08	0.263023	0.279	0.094	0.00114151	Proliferating	TSFM
0.000120608	0.26286	0.861	0.641	1	Proliferating	EDF1
1.20682e-08	0.26271	0.311	0.111	0.000425041	Proliferating	RAD9A
1.64856e-08	0.262548	0.27	0.089	0.000580622	Proliferating	RNF157
2.76909e-09	0.262346	0.443	0.182	9.75272e-05	Proliferating	UCHL5
0.000112586	0.262019	0.803	0.552	1	Proliferating	ARPC4
8.61808e-07	0.262017	0.721	0.432	0.0303529	Proliferating	CTDSPL2
1.2917e-07	0.261621	0.541	0.254	0.00454937	Proliferating	ADA
2.36375e-17	0.26146	0.27	0.048	8.32514e-13	Proliferating	REEP4
3.92058e-19	0.261328	0.328	0.063	1.38083e-14	Proliferating	DONSON
1.42169e-07	0.261159	0.615	0.313	0.00500718	Proliferating	SF3B3
4.19555e-06	0.261145	0.746	0.438	0.147767	Proliferating	CPLANE1
2.13266e-06	0.26031	0.27	0.11	0.0751124	Proliferating	NFIA
1.24147e-10	0.260269	0.311	0.095	4.37244e-06	Proliferating	TMEM214
5.94929e-06	0.259948	0.828	0.531	0.209534	Proliferating	COMT
4.23619e-07	0.25984	0.566	0.279	0.0149199	Proliferating	MTX2
6.53041e-06	0.259781	0.77	0.488	0.230001	Proliferating	FAM49B
1.38742e-05	0.259398	0.68	0.416	0.488651	Proliferating	BMP2K
1.06093e-06	0.259257	0.418	0.196	0.037366	Proliferating	LOC693477
8.75161e-15	0.259037	0.369	0.095	3.08232e-10	Proliferating	NCR3
2.23663e-10	0.258737	0.434	0.161	7.8774e-06	Proliferating	TP53I13
7.05592e-12	0.258724	0.303	0.083	2.48509e-07	Proliferating	CPSF4
1.43434e-06	0.258678	0.811	0.494	0.0505176	Proliferating	ATP5MC3
2.13036e-09	0.258636	0.418	0.162	7.50314e-05	Proliferating	ING2
0.000158942	0.258228	0.82	0.564	1	Proliferating	PPIA
2.11792e-06	0.258047	0.598	0.319	0.0745933	Proliferating	GPS2
5.92668e-08	0.257937	0.623	0.299	0.00208738	Proliferating	DCTN2
1.45439e-06	0.257872	0.803	0.508	0.0512236	Proliferating	MRPL23
2.54141e-07	0.257723	0.762	0.402	0.00895085	Proliferating	NONO
5.11887e-09	0.257414	0.377	0.145	0.000180286	Proliferating	NUDT5
4.99466e-06	0.257179	0.959	0.709	0.175912	Proliferating	LSP1
3.35371e-10	0.256819	0.336	0.109	1.18118e-05	Proliferating	KIF1BP
0.000632149	0.256801	0.426	0.239	1	Proliferating	PHF10
8.72243e-14	0.256649	0.41	0.121	3.07204e-09	Proliferating	LOC707869
4.19964e-06	0.256478	0.254	0.1	0.147911	Proliferating	GZMA
0.000108997	0.256024	0.754	0.577	1	Proliferating	CD63
1.38315e-12	0.256006	0.475	0.156	4.87145e-08	Proliferating	E2F4
4.21875e-06	0.255942	0.762	0.448	0.148584	Proliferating	IQGAP1
2.17112e-07	0.255806	0.574	0.277	0.0076467	Proliferating	PLEKHG3
5.49384e-09	0.255677	0.533	0.234	0.000193493	Proliferating	PXN
5.74216e-07	0.255669	0.344	0.151	0.0202239	Proliferating	CNNM2
1.65053e-14	0.255549	0.262	0.054	5.81315e-10	Proliferating	ACOT2
8.02258e-10	0.255522	0.262	0.078	2.82555e-05	Proliferating	SPECC1
1.48697e-07	0.255276	0.607	0.297	0.00523711	Proliferating	ILRUN
2.8601e-08	0.254955	0.451	0.189	0.00100733	Proliferating	LOC705546
3.67041e-12	0.254756	0.311	0.085	1.29272e-07	Proliferating	LOC114677344
5.42344e-08	0.254355	0.385	0.156	0.00191013	Proliferating	POLR2G
1.14715e-11	0.254213	0.254	0.064	4.04026e-07	Proliferating	CNTROB
8.52483e-06	0.254112	0.934	0.803	0.300245	Proliferating	HNRNPU
1.98585e-08	0.254109	0.451	0.19	0.000699415	Proliferating	RMND5B
1.13001e-09	0.253939	0.426	0.166	3.97991e-05	Proliferating	UBAC1
5.47454e-07	0.253644	0.615	0.327	0.0192813	Proliferating	UFD1
9.90948e-07	0.253594	0.73	0.409	0.0349012	Proliferating	PSMA3
6.73794e-08	0.253293	0.328	0.127	0.0023731	Proliferating	METAP1
7.43283e-06	0.253095	0.32	0.149	0.261784	Proliferating	AKIP1
0.000114044	0.253091	0.434	0.239	1	Proliferating	NDUFA10
9.89676e-08	0.253064	0.418	0.183	0.00348564	Proliferating	EIF4G1
3.07823e-05	0.252993	0.885	0.66	1	Proliferating	CAST
0.000584607	0.252974	0.631	0.401	1	Proliferating	QKI
4.20773e-08	0.252878	0.639	0.328	0.00148196	Proliferating	PSMD1
5.07083e-08	0.252734	0.525	0.235	0.00178595	Proliferating	VBP1
1.36209e-05	0.252685	0.598	0.34	0.479727	Proliferating	GSDMD
0.00287652	0.25268	0.762	0.543	1	Proliferating	RAP1GDS1
1.54636e-07	0.252566	0.549	0.258	0.00544627	Proliferating	TAF12
5.69293e-06	0.252498	0.352	0.166	0.200505	Proliferating	CYB561D2
5.66727e-05	0.252343	0.975	0.876	1	Proliferating	HINT1
2.90822e-09	0.252253	0.648	0.297	0.000102427	Proliferating	CKLF
0.000723305	0.252235	0.615	0.374	1	Proliferating	PUF60
4.87215e-05	0.252	0.877	0.62	1	Proliferating	FRYL
3.33844e-07	0.251723	0.697	0.37	0.011758	Proliferating	EFHD2
1.58096e-07	0.251601	0.484	0.228	0.00556813	Proliferating	PARP1
8.81106e-08	0.25137	0.557	0.278	0.00310326	Proliferating	FAM126A
1.21321e-23	0.251188	0.254	0.028	4.27291e-19	Proliferating	TIMELESS
1.9121e-05	0.250976	0.541	0.306	0.673443	Proliferating	ATF1
8.41186e-07	0.250748	0.574	0.293	0.0296266	Proliferating	KPNA3
2.86485e-10	0.250681	0.41	0.147	1.009e-05	Proliferating	NSL1
2.06958e-06	0.250659	0.689	0.389	0.0728906	Proliferating	RBM17
3.3621e-19	0.250471	0.254	0.037	1.18413e-14	Proliferating	TMEM97
