# Supplementary material for: T cell-mediated SIV dissemination into the CNS: a single-cell transcriptomic analysis
Source: Research Square preprint supplement (doi:10.21203/rs.3.rs-6537361/v1), 2025-05-09
Supplement: Supplementary file 3 [file 29d8a1e8189c43b8cf3b3e65.xlsx]

## Sheet: Cluster 0
p_val	avg_log2FC	pct.1	pct.2	p_val_adj	cluster	gene
0	1.55631	0.819	0.333	0	0	LTB
0	1.32586	0.457	0.132	0	0	ANK3
0	1.19009	0.771	0.538	0	0	RPS15A
0	1.05354	0.591	0.306	0	0	AKT3
0	0.989352	0.523	0.301	0	0	GZMK
0	0.986049	0.422	0.122	0	0	ITGA1
0	0.943492	0.637	0.436	0	0	RBPJ
0	0.94276	0.843	0.556	0	0	PAG1
0	0.934389	0.817	0.659	0	0	INPP4B
0	0.912527	0.661	0.343	0	0	IL7R
0	0.891564	0.905	0.774	0	0	BTG1
0	0.886644	0.355	0.085	0	0	PCNX2
0	0.886244	0.505	0.251	0	0	MYO1D
0	0.877452	0.781	0.598	0	0	PDE7A
0	0.876436	0.568	0.338	0	0	ANTXR2
0	0.862248	0.498	0.25	0	0	MPZL3
0	0.861443	0.797	0.624	0	0	THEMIS
0	0.858065	0.594	0.342	0	0	PLEKHG1
0	0.85548	0.524	0.318	0	0	CTSW
0	0.828124	0.53	0.259	0	0	DPP4
0	0.807242	0.953	0.843	0	0	RPL37A-1
0	0.803054	0.637	0.433	0	0	NEDD4L
0	0.791428	0.625	0.354	0	0	ZEB1
0	0.789576	0.986	0.907	0	0	RPS14
0	0.784593	0.896	0.752	0	0	CAMK4
0	0.76445	0.971	0.895	0	0	RPS29
0	0.742031	0.983	0.913	0	0	RPL30
0	0.707885	0.988	0.909	0	0	RPLP1
0	0.697959	0.384	0.145	0	0	ITGA6
0	0.680316	0.973	0.867	0	0	RPS28
0	0.678437	0.308	0.088	0	0	SEL1L3
0	0.671201	0.984	0.907	0	0	RPS16
0	0.647839	0.385	0.156	0	0	STX3
0	0.647294	0.406	0.167	0	0	SLAMF1
0	0.642129	0.289	0.1	0	0	ARHGAP10
0	0.639144	0.54	0.331	0	0	KCNA3
0	0.631903	0.98	0.899	0	0	RPS5
0	0.631206	0.958	0.864	0	0	RPL34
0	0.628802	0.978	0.902	0	0	RPL27A
0	0.624621	0.966	0.904	0	0	RPS26
0	0.621954	0.984	0.908	0	0	RPS10
0	0.621756	0.812	0.663	0	0	TC2N
0	0.621132	0.964	0.878	0	0	RPL23A
0	0.618315	0.96	0.857	0	0	RPS13
0	0.616519	0.927	0.818	0	0	TOMM7
0	0.614119	0.975	0.902	0	0	RPLP2
0	0.612222	0.982	0.92	0	0	TPT1
0	0.604222	0.988	0.909	0	0	RPS7
0	0.601308	0.963	0.891	0	0	RPL38
0	0.60106	0.96	0.865	0	0	RPL9
0	0.594159	0.985	0.921	0	0	RPS8
0	0.59065	0.992	0.944	0	0	RPL13
0	0.590626	0.987	0.925	0	0	RPL41
0	0.585633	0.916	0.888	0	0	FYB1
0	0.583513	0.695	0.445	0	0	COTL1
0	0.581695	0.967	0.877	0	0	RPL10A
0	0.568434	0.987	0.916	0	0	RPL18
0	0.562862	0.98	0.884	0	0	RPL7A
0	0.559405	0.994	0.942	0	0	RPS18
0	0.559175	0.271	0.091	0	0	RCAN3
0	0.553934	0.983	0.901	0	0	RPS27A-1
0	0.550233	0.979	0.898	0	0	RPL6
0	0.54926	0.973	0.884	0	0	RPL12
0	0.542826	0.968	0.894	0	0	RPS11
0	0.522763	0.951	0.889	0	0	RPL23
0	0.510562	0.981	0.915	0	0	RPS9
0	0.498147	0.323	0.122	0	0	FAM102A
0	0.493481	0.988	0.913	0	0	RPL10
0	0.491094	0.99	0.936	0	0	RPL13A
0	0.315227	0.312	0.094	0	0	LOC100423131
2.85007e-306	0.506818	0.98	0.904	1.0038e-301	0	RPS23
6.20579e-303	0.513451	0.919	0.814	2.18568e-298	0	RPS17
4.1241e-301	0.581013	0.944	0.856	1.45251e-296	0	RPS27
7.3133e-301	0.631216	0.417	0.206	2.57574e-296	0	ZNF618
2.51194e-297	0.508319	0.985	0.918	8.84705e-293	0	RPL8
7.36669e-292	0.668716	0.725	0.569	2.59455e-287	0	LOC114674108
6.51742e-291	0.57291	0.961	0.858	2.29544e-286	0	RPL24
7.18454e-288	0.542822	0.959	0.894	2.5304e-283	0	RPL11
1.86091e-284	0.496437	0.3	0.119	6.55413e-280	0	TCF7
2.85982e-283	0.768889	0.432	0.221	1.00723e-278	0	NR3C2
4.93819e-283	0.646373	0.681	0.515	1.73923e-278	0	ERN1
7.04762e-271	0.51559	0.956	0.874	2.48217e-266	0	RPL22
1.04624e-270	0.423082	0.978	0.913	3.68486e-266	0	RPS3
3.94366e-268	0.519543	0.866	0.737	1.38896e-263	0	RPL14
3.99842e-268	0.651425	0.761	0.688	1.40824e-263	0	RBMS1
5.08647e-267	0.880562	0.601	0.413	1.79146e-262	0	IMMP2L
2.5297e-265	0.542277	0.284	0.111	8.90959e-261	0	ANKRD6
2.46883e-258	0.516409	0.973	0.898	8.69522e-254	0	RPS21
3.00522e-258	0.537325	0.594	0.402	1.05844e-253	0	LOC716034
2.18726e-254	0.539835	0.413	0.229	7.70354e-250	0	SPINT2
5.22642e-249	0.534649	0.801	0.582	1.84075e-244	0	LOC697476
3.10398e-248	0.701046	0.63	0.466	1.09322e-243	0	SFMBT2
7.69661e-246	0.49822	0.398	0.215	2.71075e-241	0	DENND2D
1.53842e-245	0.572061	0.814	0.755	5.4183e-241	0	MGAT5
1.42074e-240	0.586944	0.829	0.792	5.00383e-236	0	SOS1
3.84967e-238	0.490522	0.851	0.678	1.35586e-233	0	LOC114669857
1.6631e-237	0.460623	0.251	0.102	5.85743e-233	0	CD9-1
6.37684e-234	0.470283	0.969	0.89	2.24592e-229	0	RPL27
6.58754e-232	0.391531	0.952	0.956	2.32013e-227	0	SKAP1
2.09377e-228	0.472219	0.963	0.892	7.37427e-224	0	RPL28
7.43324e-226	0.416605	0.992	0.94	2.61799e-221	0	RPS19
2.09708e-224	0.763122	0.628	0.481	7.38592e-220	0	FOS
5.06918e-224	0.484041	0.883	0.756	1.78536e-219	0	MYL12A
3.46875e-213	0.52813	0.734	0.621	1.22169e-208	0	TTC39C
1.83684e-212	0.419459	0.979	0.899	6.46934e-208	0	RPS20
6.22818e-212	0.72772	0.565	0.397	2.19357e-207	0	CD96
2.19645e-211	0.45004	0.851	0.821	7.7359e-207	0	MYCBP2
6.98177e-211	0.567849	0.611	0.464	2.45898e-206	0	NCOA7
3.64366e-210	0.599324	0.63	0.456	1.2833e-205	0	ADAM23
4.46723e-210	0.413463	0.967	0.901	1.57336e-205	0	RACK1
6.98157e-209	0.417164	0.966	0.868	2.45891e-204	0	RPS4X
5.84192e-207	0.55148	0.614	0.454	2.05752e-202	0	ST6GAL1
3.26599e-204	0.51271	0.271	0.121	1.15028e-199	0	AHR
6.13586e-204	0.506152	0.464	0.294	2.16105e-199	0	LOC114679625
3.37831e-197	0.629995	0.811	0.739	1.18984e-192	0	CD69
4.41354e-196	0.468116	0.787	0.688	1.55445e-191	0	EEF1A1
1.85089e-195	0.446893	0.56	0.364	6.51882e-191	0	BTBD11
1.06286e-194	0.57394	0.64	0.482	3.74338e-190	0	GNAQ
1.3968e-194	0.413885	0.742	0.574	4.91954e-190	0	PLAAT3
4.57739e-193	0.617321	0.284	0.14	1.61216e-188	0	LOC114676384
3.77487e-192	0.398431	0.983	0.917	1.32951e-187	0	RPS12
8.77524e-190	0.39757	0.933	0.838	3.09064e-185	0	RPS4Y1
1.19064e-188	0.520357	0.396	0.229	4.19343e-184	0	ZNF827
1.6656e-187	0.468407	0.358	0.2	5.86624e-183	0	INPP5A
6.30179e-187	0.47516	0.93	0.834	2.21949e-182	0	RPL35A
1.17481e-184	0.479526	0.401	0.247	4.13769e-180	0	TUBA4A
9.71359e-184	0.495511	0.81	0.69	3.42113e-179	0	S100A6
7.17802e-181	0.413489	0.926	0.843	2.5281e-176	0	EEF1B2
3.94277e-178	0.477563	0.58	0.418	1.38864e-173	0	RUNX2
2.30836e-177	0.417121	0.837	0.77	8.13005e-173	0	PNRC1
1.01696e-176	0.578369	0.717	0.646	3.58174e-172	0	TENT5C
1.24813e-176	0.478153	0.276	0.137	4.3959e-172	0	ARHGAP5
6.48953e-175	0.380732	0.956	0.867	2.28561e-170	0	RPL15
3.96952e-174	0.435508	0.929	0.834	1.39806e-169	0	RPL36
1.75086e-171	0.472429	0.365	0.212	6.16653e-167	0	CRIM1
5.2065e-171	0.444983	0.954	0.877	1.83373e-166	0	LOC703455
1.74073e-170	0.473211	0.283	0.14	6.13087e-166	0	SPOCK2
9.019e-168	0.385647	0.964	0.878	3.17649e-163	0	NACA
3.96966e-167	0.351346	0.984	0.912	1.39811e-162	0	RPL3
1.06546e-166	0.48158	0.67	0.579	3.75256e-162	0	SENP7
2.41637e-166	0.433702	0.83	0.798	8.51046e-162	0	DOCK10
1.35002e-165	0.558566	0.66	0.538	4.75476e-161	0	CHN2
1.26238e-164	0.404012	0.754	0.671	4.4461e-160	0	NDFIP1
2.28428e-164	0.388315	0.977	0.908	8.04523e-160	0	UBA52
7.42895e-164	0.435153	0.398	0.25	2.61648e-159	0	CYB5A
7.57492e-164	0.544693	0.579	0.43	2.66789e-159	0	MPP7
4.21082e-163	0.570354	0.763	0.663	1.48305e-158	0	BCL2
8.42918e-159	0.518341	0.728	0.625	2.96876e-154	0	JUN
1.07379e-158	0.499373	0.758	0.699	3.78187e-154	0	ST8SIA4
1.29285e-158	0.520824	0.665	0.554	4.55342e-154	0	FOSB
5.06932e-158	0.31401	0.915	0.818	1.78541e-153	0	VIM
2.7539e-157	0.355257	0.899	0.814	9.69924e-153	0	LOC710951
4.3847e-155	0.54266	0.927	0.925	1.54429e-150	0	LOC708686
7.71545e-154	0.481107	0.535	0.394	2.71738e-149	0	LOC114674016
2.6989e-153	0.450759	0.773	0.692	9.50552e-149	0	ARHGAP26
3.24235e-150	0.363808	0.965	0.868	1.14196e-145	0	RPLP0
3.33369e-149	0.462102	0.431	0.283	1.17412e-144	0	GRAMD1B
1.55029e-148	0.756552	0.597	0.501	5.46012e-144	0	JUNB
1.52382e-147	0.451792	0.909	0.877	5.36691e-143	0	JUND
7.27263e-147	0.538997	0.535	0.41	2.56142e-142	0	GALM
4.69488e-145	0.424442	0.876	0.767	1.65354e-140	0	RPS25
4.59804e-144	0.371697	0.346	0.205	1.61943e-139	0	DHRS3
1.44597e-143	0.420766	0.665	0.552	5.09271e-139	0	CARD11
3.91594e-143	0.365011	0.82	0.787	1.37919e-138	0	STK4
2.22953e-142	0.466235	0.65	0.541	7.8524e-138	0	CCDC91
3.09462e-142	0.369819	0.919	0.84	1.08992e-137	0	PFDN5
9.55883e-142	0.503269	0.669	0.581	3.36662e-137	0	GRAP2
7.34853e-141	0.38704	0.966	0.883	2.58815e-136	0	RPL19
2.48613e-140	0.300831	0.969	0.976	8.75614e-136	0	MBNL1
2.7042e-140	0.335034	0.98	0.913	9.52418e-136	0	FAU
7.12405e-140	0.589783	0.558	0.438	2.50909e-135	0	FAM129A
1.03953e-139	0.426729	0.396	0.251	3.66122e-135	0	MFHAS1
1.1388e-139	0.418536	0.699	0.615	4.01086e-135	0	ATM
5.91857e-139	0.665345	0.38	0.247	2.08452e-134	0	LOC704510
1.29264e-138	0.440767	0.812	0.687	4.55267e-134	0	RPL32
3.51695e-136	0.443661	0.522	0.407	1.23867e-131	0	SEPTIN1
2.28809e-135	0.352552	0.835	0.804	8.05866e-131	0	CCND3
2.94112e-135	0.443799	0.404	0.276	1.03586e-130	0	NABP1
3.38592e-135	0.357477	0.874	0.867	1.19252e-130	0	ANKRD12
1.1515e-133	0.356375	0.958	0.876	4.05559e-129	0	LOC712274
7.04786e-132	0.540855	0.735	0.608	2.48226e-127	0	RPL37A
1.89087e-131	0.398088	0.799	0.7	6.65964e-127	0	SMDT1
4.26143e-130	0.367991	0.323	0.196	1.50088e-125	0	LOC106994447
6.27636e-128	0.411709	0.696	0.615	2.21054e-123	0	TNFAIP8
6.62763e-128	0.341431	0.841	0.744	2.33425e-123	0	RPL26
1.37405e-127	0.416749	0.746	0.653	4.83941e-123	0	COMMD6
1.44929e-126	0.384227	0.41	0.282	5.10439e-122	0	PDCD4
1.08215e-125	0.378623	0.293	0.172	3.81132e-121	0	ARHGEF33
3.55562e-123	0.405115	0.809	0.798	1.25229e-118	0	SCAPER
4.74441e-118	0.373256	0.65	0.559	1.67098e-113	0	SEPTIN6
6.41278e-118	0.56041	0.351	0.23	2.25858e-113	0	ST8SIA1
3.87225e-115	0.396066	0.709	0.622	1.36381e-110	0	DUSP1
6.12497e-115	0.375543	0.352	0.228	2.15721e-110	0	MAN1C1
1.47478e-114	0.484448	0.449	0.335	5.19417e-110	0	MDFIC
1.23017e-112	0.319972	0.278	0.165	4.33267e-108	0	ATP8B2
1.08736e-111	0.59984	0.485	0.373	3.82969e-107	0	EXT1
3.78725e-111	0.35444	0.72	0.615	1.33387e-106	0	CD3E
2.04726e-110	0.46417	0.527	0.435	7.21043e-106	0	COA1
1.62588e-108	0.444003	0.549	0.455	5.72634e-104	0	RASA1
2.56022e-108	0.376565	0.338	0.214	9.0171e-104	0	CSF1
3.64683e-108	0.410946	0.729	0.639	1.28441e-103	0	LOC106992647
5.10627e-106	0.346188	0.311	0.189	1.79843e-101	0	RETREG1
3.03497e-103	0.256447	0.892	0.826	1.06892e-98	0	HSP90AB1
2.32039e-102	0.33563	0.408	0.293	8.17242e-98	0	SEPTIN9
3.58989e-100	0.351307	0.844	0.787	1.26436e-95	0	GIMAP7
4.1104e-100	0.392551	0.467	0.36	1.44768e-95	0	LOC114677708
4.36438e-99	0.355733	0.441	0.326	1.53714e-94	0	KIAA1671
1.00452e-98	0.371582	0.496	0.399	3.53793e-94	0	TNKS2
1.96878e-98	0.36351	0.876	0.892	6.93403e-94	0	SIK3
2.8607e-98	0.334925	0.857	0.791	1.00754e-93	0	EIF3K
4.57081e-98	0.435133	0.347	0.242	1.60984e-93	0	TOB1
8.57207e-97	0.351035	0.746	0.693	3.01908e-92	0	LOC106999939
1.3339e-96	0.387401	0.465	0.364	4.69801e-92	0	CKLF
3.05064e-96	0.541674	0.426	0.32	1.07444e-91	0	RASGEF1B
3.48868e-96	0.337654	0.296	0.186	1.22871e-91	0	MCF2L
8.75771e-95	0.46611	0.549	0.458	3.08447e-90	0	SLC2A3
2.96598e-94	0.361994	0.87	0.785	1.04462e-89	0	RPS24
8.85737e-94	0.350505	0.428	0.32	3.11957e-89	0	LY9
1.92681e-92	0.287692	0.782	0.748	6.78624e-88	0	EVL
3.91923e-92	0.475015	0.669	0.601	1.38035e-87	0	PPP2R2B
7.56802e-92	0.351713	0.576	0.497	2.66546e-87	0	CD2
8.41124e-92	0.400738	0.45	0.349	2.96244e-87	0	SAMD3
5.51803e-91	0.271461	0.945	0.888	1.94345e-86	0	EIF1
7.7782e-90	0.375485	0.645	0.597	2.73948e-85	0	PCNX1
1.16504e-88	0.341795	0.286	0.175	4.10325e-84	0	LOC704083
1.28639e-88	0.426482	0.535	0.467	4.53068e-84	0	RBL2
1.59539e-88	0.364182	0.485	0.39	5.61896e-84	0	LOC114671323
1.99948e-88	0.318166	0.846	0.772	7.04216e-84	0	EEF1G
3.796e-88	0.4174	0.654	0.576	1.33695e-83	0	LOC716530
4.5369e-88	0.369152	0.436	0.342	1.59789e-83	0	TMEM14C
1.12873e-87	0.334635	0.336	0.233	3.9754e-83	0	ARSG
2.09984e-87	0.295726	0.274	0.173	7.39562e-83	0	CCDC50
4.91781e-87	0.276208	0.96	0.899	1.73205e-82	0	RPL21
6.26149e-87	0.380186	0.472	0.355	2.2053e-82	0	GPRIN3
1.17573e-86	0.264034	0.988	0.938	4.14092e-82	0	RPS15
1.2952e-86	0.346539	0.38	0.281	4.56169e-82	0	FLT3LG
1.93368e-86	0.334045	0.339	0.236	6.81041e-82	0	GATA3
7.43783e-86	0.395302	0.729	0.708	2.6196e-81	0	NEK7
1.09854e-85	0.26406	0.862	0.87	3.86904e-81	0	TNRC6B
3.3817e-85	0.344122	0.321	0.226	1.19103e-80	0	DGKA
7.97764e-85	0.251913	0.923	0.92	2.80973e-80	0	STK17B
2.34446e-80	0.291201	0.882	0.797	8.25718e-76	0	NME2
2.36757e-80	0.512127	0.684	0.622	8.33858e-76	0	LOC701976
6.56981e-80	0.263026	0.858	0.867	2.31389e-75	0	PIP4K2A
6.70954e-80	0.337148	0.289	0.198	2.3631e-75	0	DDT
5.33611e-79	0.357611	0.803	0.765	1.87938e-74	0	TOX
6.04488e-79	0.338744	0.349	0.254	2.12901e-74	0	MGAT4A
1.58695e-78	0.351533	0.359	0.261	5.58925e-74	0	SLC16A7
4.52536e-78	0.34301	0.647	0.565	1.59383e-73	0	OST4
1.11346e-77	0.359224	0.675	0.625	3.92162e-73	0	JAZF1
4.45773e-77	0.299278	0.321	0.221	1.57001e-72	0	PLXNC1
1.8036e-75	0.389664	0.618	0.542	6.3523e-71	0	GZMM
2.78367e-75	0.318916	0.267	0.179	9.80407e-71	0	RNASE4
3.71143e-74	0.454579	0.569	0.494	1.30717e-69	0	BICDL1
6.7552e-74	0.309131	0.774	0.755	2.37918e-69	0	ZNF609
1.42185e-73	0.27683	0.281	0.188	5.00775e-69	0	LOC114675937
1.51743e-73	0.350401	0.296	0.207	5.34439e-69	0	KANSL1L
8.03792e-72	0.494586	0.408	0.326	2.83096e-67	0	CASK
2.06539e-71	0.315915	0.681	0.608	7.27431e-67	0	MIF
2.52872e-70	0.314271	0.841	0.879	8.90615e-66	0	PARP8
3.97775e-70	0.288551	0.264	0.175	1.40096e-65	0	C14H11orf65
9.92286e-70	0.290047	0.627	0.578	3.49483e-65	0	NFATC2
1.11472e-69	0.285165	0.698	0.669	3.92604e-65	0	PSIP1
6.28584e-69	0.291191	0.736	0.721	2.21387e-64	0	RASGRP1
2.55052e-68	0.263356	0.899	0.847	8.98293e-64	0	EEF1D
5.47783e-68	0.312994	0.286	0.199	1.92929e-63	0	RYK
1.18329e-66	0.314311	0.672	0.627	4.16756e-62	0	TOMM20
5.13838e-66	0.257876	0.755	0.737	1.80974e-61	0	PABPC1
1.04681e-64	0.286535	0.284	0.199	3.68688e-60	0	FCMR
1.58283e-64	0.264694	0.717	0.691	5.57472e-60	0	CCNL1
1.63087e-64	0.313471	0.73	0.714	5.74391e-60	0	PACS1
1.80001e-64	0.321693	0.327	0.244	6.33963e-60	0	FUOM
1.89637e-64	0.328778	0.499	0.434	6.67902e-60	0	WWP1
2.14638e-64	0.308476	0.66	0.616	7.55956e-60	0	FUT8
3.55296e-64	0.36627	0.526	0.446	1.25135e-59	0	LOC702677
3.76539e-64	0.283139	0.296	0.215	1.32617e-59	0	RPL31
5.71129e-64	0.345338	0.375	0.292	2.01152e-59	0	ARHGAP18
6.36746e-64	0.285004	0.546	0.489	2.24262e-59	0	LOC720413
1.12888e-63	0.360022	0.494	0.434	3.97591e-59	0	REX1BD
1.94856e-63	0.304604	0.501	0.433	6.86283e-59	0	GIMAP5
9.53972e-63	0.325896	0.739	0.735	3.35989e-58	0	ARIH1
2.53597e-62	0.296946	0.735	0.673	8.9317e-58	0	EIF3F
2.62507e-62	0.261618	0.762	0.758	9.24549e-58	0	KMT2A
4.73613e-62	0.291637	0.546	0.458	1.66807e-57	0	PDE4B
6.093e-62	0.288134	0.692	0.653	2.14595e-57	0	SLC4A7
6.4639e-62	0.26739	0.677	0.623	2.27659e-57	0	ARL6IP5
6.99806e-62	0.353634	0.615	0.578	2.46472e-57	0	ASAP1
4.21367e-61	0.293522	0.343	0.265	1.48406e-56	0	TMC8
1.52902e-60	0.266636	0.352	0.272	5.3852e-56	0	DYRK2
3.06833e-60	0.335871	0.284	0.205	1.08066e-55	0	CEP112
1.9905e-59	0.254761	0.284	0.202	7.01054e-55	0	SYNE3
2.0043e-59	0.27653	0.514	0.458	7.05914e-55	0	RAP1A
2.39131e-59	0.365782	0.489	0.422	8.42219e-55	0	NT5DC1
8.76028e-58	0.287187	0.78	0.71	3.08537e-53	0	LOC106998836
1.41933e-57	0.305357	0.348	0.256	4.99888e-53	0	ICOS
1.73607e-56	0.31086	0.519	0.461	6.11443e-52	0	GYPC
8.353e-56	0.283659	0.529	0.475	2.94193e-51	0	CYLD
1.3216e-55	0.28522	0.801	0.729	4.65469e-51	0	LOC703365
1.38632e-55	0.284563	0.653	0.625	4.88261e-51	0	TMEM131L
4.81898e-55	0.274897	0.638	0.591	1.69725e-50	0	RESF1
1.67223e-54	0.297448	0.38	0.303	5.88958e-50	0	CNN2
7.14667e-54	0.310763	0.51	0.449	2.51706e-49	0	VAMP8
8.02475e-54	0.278141	0.614	0.574	2.82632e-49	0	KTN1
1.69309e-53	0.270492	0.47	0.394	5.96307e-49	0	LRIG1
2.08552e-53	0.257602	0.651	0.613	7.34521e-49	0	NPM1
3.4948e-53	0.334751	0.332	0.255	1.23087e-48	0	VWA8
4.57195e-53	0.274743	0.439	0.372	1.61024e-48	0	TMEM87B
4.72595e-53	0.310587	0.634	0.568	1.66448e-48	0	BTF3
7.06979e-52	0.330283	0.491	0.428	2.48998e-47	0	ALDOA
1.32721e-51	0.291198	0.369	0.296	4.67444e-47	0	RFTN1
2.18726e-51	0.2898	0.706	0.707	7.70354e-47	0	DENND1B
2.89827e-51	0.28118	0.493	0.423	1.02077e-46	0	LOC107000013
4.27578e-51	0.260254	0.252	0.178	1.50593e-46	0	LOC114676952
1.04107e-50	0.325852	0.569	0.514	3.66665e-46	0	RPL29
8.04794e-50	0.296671	0.596	0.546	2.83448e-45	0	C19H19orf53
1.4233e-49	0.299716	0.263	0.192	5.01286e-45	0	DMXL2
9.56349e-49	0.562679	0.438	0.375	3.36826e-44	0	ZSWIM4
8.7272e-48	0.27343	0.707	0.644	3.07372e-43	0	KRTCAP2
1.71996e-47	0.309995	0.379	0.299	6.05771e-43	0	LOC714964
3.46286e-47	0.270734	0.634	0.609	1.21962e-42	0	CASC4
4.62695e-47	0.287027	0.655	0.638	1.62961e-42	0	CEP85L
5.60052e-47	0.563983	0.55	0.522	1.9725e-42	0	ITGB1
1.11183e-45	0.261205	0.472	0.404	3.91585e-41	0	SATB1
3.35828e-44	0.27198	0.665	0.655	1.18279e-39	0	GOLGA4
6.81193e-44	0.306672	0.383	0.322	2.39916e-39	0	CUTA
1.24214e-43	0.278158	0.401	0.329	4.37481e-39	0	SYNE2
1.22993e-42	0.297547	0.353	0.283	4.33181e-38	0	PECAM1
2.56532e-42	0.28023	0.364	0.307	9.03504e-38	0	RPS27A
7.08361e-42	0.296124	0.477	0.417	2.49485e-37	0	GAS7
1.65967e-41	0.300523	0.677	0.648	5.84535e-37	0	ZFP36
2.42029e-40	0.278536	0.687	0.633	8.52426e-36	0	RPL36AL
2.42961e-40	0.267879	0.623	0.607	8.5571e-36	0	TUT4
3.03617e-40	0.258051	0.525	0.463	1.06934e-35	0	RGS1
6.04372e-40	0.311292	0.733	0.711	2.1286e-35	0	MAMU-A3
3.41965e-39	0.258796	0.458	0.4	1.2044e-34	0	LOC705946
3.84621e-39	0.30894	0.277	0.213	1.35463e-34	0	MAGED1
2.52376e-38	0.256174	0.538	0.502	8.88869e-34	0	STIM2
3.44837e-38	0.263455	0.558	0.518	1.21452e-33	0	NME3
3.7784e-38	0.279403	0.66	0.64	1.33075e-33	0	EXOC6B
2.60068e-37	0.250006	0.475	0.415	9.15958e-33	0	PLP2
2.96738e-37	0.254835	0.363	0.306	1.04511e-32	0	CD244
6.7399e-37	0.259013	0.396	0.345	2.37379e-32	0	PSTPIP1
7.33819e-37	0.260491	0.711	0.663	2.58451e-32	0	ATP5MC2
9.97646e-37	0.283613	0.402	0.347	3.51371e-32	0	LMBR1
1.18735e-36	0.315835	0.596	0.575	4.18185e-32	0	SUPT3H
1.61146e-36	0.264876	0.36	0.309	5.67557e-32	0	EVI2B
1.9946e-36	0.299228	0.293	0.228	7.02499e-32	0	GPR183
2.31562e-36	0.268634	0.621	0.571	8.15562e-32	0	LOC106996680
9.92015e-36	0.274177	0.356	0.298	3.49388e-31	0	NFKBIZ
2.65893e-35	0.310658	0.251	0.192	9.36477e-31	0	CYSLTR1
1.07968e-34	0.288037	0.341	0.293	3.80263e-30	0	LOC698942
1.44593e-34	0.29108	0.339	0.286	5.09255e-30	0	TMEM123
4.51817e-34	0.293883	0.274	0.22	1.5913e-29	0	PDK1
4.89414e-34	0.267317	0.579	0.557	1.72372e-29	0	ATP8A1
1.17398e-32	0.282251	0.279	0.22	4.13477e-28	0	AHCYL2
1.43519e-32	0.25615	0.392	0.331	5.05473e-28	0	CPQ
6.00302e-32	0.257033	0.526	0.493	2.11426e-27	0	TNFSF4
6.3406e-32	0.272929	0.305	0.248	2.23316e-27	0	ERC1
9.02151e-32	0.253916	0.294	0.24	3.17738e-27	0	SOCS1
9.16878e-32	0.259115	0.444	0.406	3.22924e-27	0	GIMAP6
4.27284e-31	0.272167	0.371	0.317	1.50489e-26	0	TSPAN5
1.06187e-30	0.25657	0.267	0.217	3.73989e-26	0	LOC114679035
1.0713e-30	0.26767	0.528	0.489	3.77313e-26	0	DIPK1A
1.31588e-28	0.268922	0.296	0.251	4.63453e-24	0	LYAR
1.39278e-28	0.268696	0.516	0.494	4.90536e-24	0	TAB2
1.59206e-27	0.274256	0.387	0.348	5.60724e-23	0	LOC114674318
8.93437e-27	0.284619	0.404	0.368	3.14669e-22	0	TSPO
4.71824e-23	0.251366	0.594	0.606	1.66176e-18	0	TLK1
7.24689e-22	0.392878	0.592	0.598	2.55235e-17	0	CDC14A
9.49308e-21	0.250087	0.529	0.529	3.34346e-16	0	SUCLG2
2.05064e-15	0.271079	0.506	0.498	7.22236e-11	0	MAMU-A

## Sheet: Cluster 1
p_val	avg_log2FC	pct.1	pct.2	p_val_adj	cluster	gene
0	1.28535	0.584	0.139	0	1	NHSL2
0	1.21045	0.538	0.22	0	1	ROR2
0	1.10639	0.989	0.79	0	1	S100A10
0	1.08571	0.967	0.66	0	1	ZEB2
0	1.06833	0.41	0.146	0	1	ARHGAP32
0	1.06147	0.741	0.383	0	1	CLIC5
0	1.03447	0.483	0.138	0	1	FRY
0	1.01476	0.648	0.24	0	1	GPR141
0	1.00478	0.934	0.628	0	1	RGS9
0	0.972739	0.779	0.419	0	1	KLF3
0	0.968844	0.325	0.069	0	1	NTN4
0	0.955709	0.439	0.13	0	1	TNFRSF18
0	0.953848	0.906	0.585	0	1	TGFBR3
0	0.909354	0.533	0.218	0	1	IL7
0	0.904418	0.895	0.505	0	1	KLF2
0	0.899206	0.718	0.439	0	1	CD226
0	0.896328	0.952	0.574	0	1	GZMH
0	0.896032	0.887	0.468	0	1	RAP1GAP2
0	0.892861	0.774	0.35	0	1	CX3CR1
0	0.871082	0.785	0.573	0	1	RAPGEF2
0	0.861252	0.893	0.729	0	1	PIK3R5
0	0.853837	0.584	0.304	0	1	ITM2A
0	0.833577	0.883	0.717	0	1	ATP2B4
0	0.819068	0.933	0.79	0	1	ITGA4
0	0.813225	0.923	0.758	0	1	BABAM2
0	0.785261	0.938	0.792	0	1	AHNAK
0	0.78263	0.465	0.18	0	1	LOC106999823
0	0.772417	0.701	0.462	0	1	TMTC2
0	0.766264	0.555	0.289	0	1	LOC114677679
0	0.754929	0.987	0.926	0	1	RIPOR2
0	0.753042	0.996	0.876	0	1	S100A4
0	0.74686	0.668	0.361	0	1	JAKMIP2
0	0.735683	0.902	0.773	0	1	SYNE1
0	0.727819	0.617	0.335	0	1	CLEC12A
0	0.719604	0.632	0.357	0	1	GOLIM4
0	0.704398	0.771	0.545	0	1	CD84
0	0.702078	0.707	0.442	0	1	DOCK5
0	0.702076	0.688	0.398	0	1	CD6
0	0.70072	0.537	0.278	0	1	PRR5L
0	0.696589	0.755	0.535	0	1	MTPN
0	0.695637	0.735	0.529	0	1	FAR1
0	0.676935	0.443	0.176	0	1	KLRG1
0	0.676483	0.736	0.501	0	1	STK38
0	0.673435	0.996	0.902	0	1	CD52
0	0.669665	0.952	0.77	0	1	CD3G
0	0.646983	0.882	0.619	0	1	FLNA
0	0.645933	0.993	0.888	0	1	SH3BGRL3
0	0.641101	0.908	0.731	0	1	SLCO3A1
0	0.609325	0.991	0.821	0	1	NKG7
0	0.607627	0.454	0.196	0	1	TSPAN2
0	0.581993	0.467	0.225	0	1	PLEKHG3
0	0.52822	0.987	0.918	0	1	RAP1B
0	0.485819	0.779	0.456	0	1	C11H12orf75
0	0.388865	0.993	0.659	0	1	GZMB
1.16442e-304	0.640259	0.711	0.449	4.1011e-300	1	LOC114675357
5.42374e-304	0.603691	0.923	0.799	1.91024e-299	1	PTPRJ
3.86087e-303	0.669131	0.712	0.476	1.3598e-298	1	ATXN7L1
6.01643e-299	0.44867	1	0.982	2.11899e-294	1	B2M
3.92696e-295	0.708171	0.754	0.506	1.38307e-290	1	KLRD1
1.24014e-294	0.636397	0.575	0.309	4.36778e-290	1	CAPG
2.7123e-293	0.53512	0.357	0.142	9.55271e-289	1	LOC107000655
9.75549e-288	0.578797	0.904	0.736	3.43588e-283	1	ANXA1
4.19757e-285	0.580371	0.667	0.433	1.47838e-280	1	ISCA1
6.20499e-283	0.65692	0.833	0.596	2.1854e-278	1	LOC701976
1.71447e-273	0.665284	0.714	0.486	6.03837e-269	1	CEMIP2
4.94227e-271	0.646675	0.882	0.747	1.74067e-266	1	FKBP5
5.38088e-269	0.587093	0.541	0.315	1.89515e-264	1	CERKL
6.03199e-269	0.586186	0.959	0.907	2.12447e-264	1	KLF12
1.19484e-268	0.355339	0.994	0.978	4.20823e-264	1	PTPRC
2.88635e-268	0.518882	0.92	0.836	1.01657e-263	1	DIAPH1
3.013e-262	0.722259	0.585	0.367	1.06118e-257	1	TTC3
3.19629e-261	0.553188	0.917	0.751	1.12573e-256	1	LOC114669767
7.64545e-253	0.536187	0.964	0.914	2.69273e-248	1	RABGAP1L
3.29829e-251	0.642552	0.563	0.334	1.16166e-246	1	AGPAT4
1.21825e-249	0.544373	0.847	0.636	4.29069e-245	1	TSC22D3
5.1035e-246	0.576899	0.866	0.746	1.79745e-241	1	ARHGEF3
5.56739e-238	0.484276	0.806	0.58	1.96084e-233	1	ANXA2
5.95408e-238	0.651542	0.573	0.367	2.09703e-233	1	LOC701439
6.45024e-236	0.656338	0.408	0.196	2.27177e-231	1	C1H1orf21
1.4726e-234	0.623182	0.408	0.2	5.18651e-230	1	RHOBTB3
7.75323e-230	0.655425	0.649	0.471	2.73069e-225	1	OXSR1
1.26799e-228	0.519728	0.769	0.596	4.46587e-224	1	CPD
4.71109e-220	0.555011	0.429	0.225	1.65925e-215	1	SLCO4C1
2.1185e-218	0.511729	0.657	0.463	7.46136e-214	1	RUNX3
6.21967e-218	0.553796	0.786	0.612	2.19057e-213	1	SYTL2
6.27323e-217	0.460496	0.955	0.893	2.20943e-212	1	TNIK
1.42476e-216	0.5198	0.546	0.32	5.01802e-212	1	KLRF1
1.64799e-214	0.421355	0.957	0.91	5.80421e-210	1	PPP1R12A
7.62825e-214	0.425865	0.931	0.758	2.68667e-209	1	EMP3
1.45088e-211	0.400769	0.973	0.81	5.10998e-207	1	CD3D
1.02811e-207	0.471193	0.821	0.646	3.62102e-203	1	ITGB2
2.75093e-204	0.547742	0.881	0.748	9.68878e-200	1	RORA
3.69575e-204	0.461952	0.857	0.743	1.30164e-199	1	RNF149
1.39752e-202	0.491861	0.971	0.842	4.92205e-198	1	CRIP1
2.49151e-199	0.43239	0.369	0.179	8.7751e-195	1	ADGRG1
2.72578e-199	0.560472	0.532	0.329	9.60021e-195	1	TMEM156
9.32175e-198	0.472214	0.54	0.337	3.28312e-193	1	TBX21
8.36451e-197	0.465256	0.873	0.713	2.94598e-192	1	TXNIP
1.79031e-194	0.516679	0.929	0.825	6.30549e-190	1	LOC703029
1.682e-188	0.386643	0.897	0.805	5.92401e-184	1	SORL1
6.2214e-185	0.373594	0.952	0.891	2.19118e-180	1	MBP
6.26932e-185	0.661644	0.61	0.426	2.20805e-180	1	TFDP2
2.56567e-181	0.343066	0.788	0.559	9.0363e-177	1	PRF1
9.88201e-179	0.512039	0.668	0.49	3.48044e-174	1	HEG1
1.11081e-178	0.432124	0.349	0.179	3.91229e-174	1	SYT11
1.42134e-178	0.344884	0.987	0.922	5.00596e-174	1	CALM1
1.00545e-177	0.401493	0.95	0.783	3.54119e-173	1	CST7
1.57733e-176	0.469637	0.482	0.297	5.55536e-172	1	USP28
1.49436e-174	0.457159	0.278	0.123	5.26313e-170	1	ABCA1
3.5699e-174	0.576924	0.859	0.769	1.25732e-169	1	LRRC8C
8.09653e-174	0.455444	0.982	0.884	2.8516e-169	1	CD48
1.19255e-172	0.416848	0.889	0.79	4.20016e-168	1	NR3C1
1.59478e-172	0.439408	0.644	0.45	5.61681e-168	1	SSBP4
6.15012e-172	0.501012	0.75	0.604	2.16607e-167	1	LOC106992273
1.57645e-171	0.388412	0.329	0.161	5.55224e-167	1	CD5
6.74941e-170	0.399943	0.931	0.855	2.37714e-165	1	IQGAP2
1.13174e-166	0.442037	0.79	0.673	3.98598e-162	1	RAB27A
1.54321e-166	0.473502	0.586	0.411	5.43518e-162	1	SLAMF6
6.48171e-166	0.472299	0.419	0.242	2.28286e-161	1	MAMU-DQB1
1.5687e-165	0.47897	0.693	0.542	5.52496e-161	1	SERPINB9
2.95649e-165	0.484769	0.885	0.793	1.04127e-160	1	FBXW7
6.33955e-165	0.373863	0.798	0.58	2.23279e-160	1	PPP2R2B
3.30692e-162	0.403753	0.39	0.219	1.1647e-157	1	LOC107000617
4.88645e-162	0.42588	0.766	0.653	1.72101e-157	1	SPATA13
1.88226e-161	0.377811	0.988	0.887	6.62932e-157	1	MAMU-AG
1.98996e-161	0.392414	0.746	0.604	7.00864e-157	1	MOB2
3.80209e-159	0.601796	0.675	0.487	1.33909e-154	1	LOC114677644
2.53292e-156	0.374284	0.849	0.678	8.92094e-152	1	LOC106993196
1.85563e-155	0.387809	0.971	0.915	6.53552e-151	1	PRKCH
4.17264e-155	0.348639	0.985	0.949	1.4696e-150	1	LOC707383
6.42529e-155	0.410045	0.285	0.137	2.26299e-150	1	CMA1
1.06299e-154	0.344754	0.961	0.917	3.74386e-150	1	AKAP13
1.3012e-153	0.416078	0.906	0.807	4.58283e-149	1	DNAJC1
2.4644e-150	0.386476	0.78	0.632	8.67962e-146	1	GLIPR2
3.10074e-148	0.416015	0.706	0.548	1.09208e-143	1	ZBTB38
6.43035e-148	0.417127	0.42	0.254	2.26477e-143	1	P2RY8
6.68123e-148	0.457051	0.696	0.547	2.35313e-143	1	ATP2B1
3.3089e-147	0.419375	0.719	0.576	1.16539e-142	1	TMEM50A
3.49551e-147	0.39034	0.494	0.319	1.23112e-142	1	PLEK
8.01392e-147	0.417085	0.579	0.411	2.8225e-142	1	REXO2
8.49776e-146	0.449801	0.637	0.461	2.99291e-141	1	TPD52
4.1859e-144	0.394961	0.638	0.488	1.47427e-139	1	MADD
7.10534e-144	0.418702	0.575	0.404	2.5025e-139	1	C15H9orf16
2.85781e-143	0.426643	0.734	0.623	1.00652e-138	1	NLRC5
7.67173e-143	0.335997	0.941	0.876	2.70198e-138	1	ETS1
8.98673e-140	0.425985	0.432	0.259	3.16513e-135	1	CLECL1
6.48997e-138	0.40513	0.621	0.477	2.28577e-133	1	KIAA0040
5.13034e-135	0.40022	0.474	0.313	1.80691e-130	1	GLRX
1.50379e-132	0.419301	0.324	0.184	5.29635e-128	1	GDE1
3.01484e-132	0.362887	0.895	0.738	1.06183e-127	1	LOC114669738
4.32395e-131	0.523614	0.566	0.402	1.5229e-126	1	LOC114671905
4.84339e-131	0.408713	0.685	0.554	1.70584e-126	1	TMEM181
1.5012e-130	0.378257	0.341	0.19	5.28722e-126	1	SERPINA1
5.81628e-130	0.48317	0.842	0.74	2.04849e-125	1	PDE3B
4.22639e-129	0.487439	0.584	0.445	1.48853e-124	1	AP1S2
1.73782e-127	0.393803	0.605	0.46	6.12062e-123	1	IDS
4.11457e-127	0.419442	0.889	0.83	1.44915e-122	1	PPP3CA
2.58494e-125	0.318647	0.909	0.821	9.10415e-121	1	SYTL3
2.0195e-123	0.409564	0.622	0.482	7.11269e-119	1	KIAA1257
1.42664e-122	0.316712	0.955	0.912	5.02461e-118	1	SH3KBP1
1.72006e-122	0.432008	0.785	0.661	6.05805e-118	1	SNTB1
5.73976e-121	0.38197	0.843	0.686	2.02154e-116	1	LOC705095
2.02584e-120	0.364753	0.386	0.235	7.13503e-116	1	LOC106997848
7.4699e-120	0.352653	0.653	0.493	2.6309e-115	1	ARID5B
7.55156e-120	0.369948	0.484	0.322	2.65966e-115	1	FAM49A
2.1421e-119	0.501773	0.553	0.394	7.54447e-115	1	APBB2
3.89569e-119	0.329344	0.845	0.749	1.37206e-114	1	BIN2
1.18642e-117	0.332242	0.785	0.663	4.17857e-113	1	TNFRSF1B
7.66809e-117	0.335879	0.679	0.547	2.7007e-112	1	KLF13
1.85695e-115	0.255457	0.996	0.921	6.54018e-111	1	TMSB10
3.60448e-115	0.410347	0.536	0.395	1.2695e-110	1	NRROS
9.68467e-115	0.524068	0.566	0.427	3.41094e-110	1	PTMS
1.52407e-114	0.405518	0.718	0.591	5.36778e-110	1	ISG20
1.17027e-113	0.371047	0.686	0.566	4.12168e-109	1	BRD7
1.57883e-113	0.341508	0.752	0.589	5.56064e-109	1	PLAAT3
1.19296e-111	0.320056	0.636	0.49	4.20159e-107	1	MYO1G
1.23638e-111	0.422348	0.534	0.398	4.35453e-107	1	TMEM154
1.1142e-110	0.284407	0.964	0.924	3.92422e-106	1	EML4
2.34335e-110	0.331048	0.43	0.283	8.25328e-106	1	RASGRP2
1.2182e-109	0.547993	0.264	0.142	4.2905e-105	1	CDKL5
1.38006e-109	0.320666	0.251	0.128	4.86055e-105	1	ZFYVE28
7.84848e-109	0.366958	0.731	0.625	2.76424e-104	1	SNRK
1.15168e-108	0.334718	0.868	0.779	4.05621e-104	1	AAK1
5.7127e-108	0.427125	0.512	0.371	2.01201e-103	1	FNDC3B
1.21484e-107	0.297477	0.913	0.779	4.27865e-103	1	SELENOW
1.71757e-106	0.319026	0.792	0.656	6.04929e-102	1	NKG2D
2.41991e-106	0.319574	0.758	0.616	8.52294e-102	1	ABRACL
4.20209e-106	0.310015	0.949	0.794	1.47998e-101	1	HCST
1.27704e-104	0.316922	0.788	0.693	4.49774e-100	1	TLN1
1.72175e-104	0.380023	0.533	0.4	6.064e-100	1	ILRUN
1.77582e-104	0.323177	0.637	0.487	6.25442e-100	1	DYNLL1
7.43186e-103	0.343098	0.588	0.456	2.6175e-98	1	EFCC1
1.28299e-102	0.38475	0.777	0.689	4.51871e-98	1	XYLT1
7.18742e-102	0.517011	0.423	0.29	2.53141e-97	1	DISP1
1.35334e-101	0.278856	0.263	0.145	4.76645e-97	1	LOC114677617
5.23194e-101	0.317515	0.619	0.472	1.84269e-96	1	BHLHE40
1.49581e-100	0.370638	0.636	0.513	5.26824e-96	1	CCSER2
2.09292e-100	0.335745	0.269	0.148	7.37126e-96	1	SLC11A1
4.05819e-100	0.329415	0.398	0.265	1.4293e-95	1	PRR5
6.97608e-100	0.32751	0.631	0.497	2.45698e-95	1	MGST3
7.78211e-100	0.334803	0.636	0.502	2.74086e-95	1	RABAC1
4.0599e-99	0.312004	0.765	0.664	1.4299e-94	1	CYTH1
7.06575e-99	0.355749	0.317	0.193	2.48856e-94	1	CEP78
5.67804e-97	0.349903	0.454	0.318	1.9998e-92	1	SH3BP5
9.88247e-97	0.547801	0.331	0.208	3.4806e-92	1	EFCAB11
1.36047e-96	0.393212	0.495	0.374	4.79158e-92	1	PTTG1IP
1.84919e-96	0.303405	0.873	0.792	6.51283e-92	1	MAPRE2
2.59869e-96	0.311699	0.788	0.707	9.1526e-92	1	PPP3CC
1.14284e-93	0.329185	0.875	0.812	4.02507e-89	1	PRKCA
1.77208e-93	0.346933	0.719	0.635	6.24125e-89	1	AGPS
1.31308e-92	0.35229	0.781	0.71	4.62466e-88	1	UBE2H
1.49015e-92	0.400189	0.266	0.149	5.2483e-88	1	IL15
5.58628e-92	0.367199	0.87	0.812	1.96749e-87	1	GNG2
6.56459e-92	0.333714	0.533	0.4	2.31205e-87	1	CIB1
8.63882e-92	0.258802	0.813	0.719	3.04259e-87	1	ITGAL
1.46359e-91	0.261027	0.712	0.581	5.15475e-87	1	RGCC
1.85174e-91	0.302785	0.883	0.83	6.52181e-87	1	INPP4A
2.33092e-91	0.280096	0.691	0.554	8.20951e-87	1	TESC
3.63079e-91	0.320346	0.708	0.596	1.27877e-86	1	OSTF1
1.34051e-90	0.352824	0.296	0.172	4.72127e-86	1	FGFBP2
1.65786e-90	0.325807	0.626	0.506	5.83897e-86	1	SMAD3
3.10085e-89	0.315063	0.85	0.77	1.09212e-84	1	SRPK2
2.07563e-88	0.311858	0.694	0.599	7.31037e-84	1	XPO6
2.08187e-87	0.308829	0.448	0.315	7.33236e-83	1	RASA3
5.26281e-87	0.321126	0.476	0.352	1.85356e-82	1	PXN
4.07655e-86	0.342567	0.7	0.599	1.43576e-81	1	ABLIM1
7.08068e-86	0.327583	0.57	0.434	2.49382e-81	1	PDZD8
1.32895e-85	0.355952	0.478	0.35	4.68058e-81	1	TUBA1A
1.74616e-85	0.322079	0.377	0.256	6.14997e-81	1	ENPP4
8.7634e-85	0.473944	0.516	0.41	3.08647e-80	1	EMB
1.31995e-84	0.371717	0.677	0.566	4.64887e-80	1	C11H12orf57
2.22202e-83	0.269621	0.98	0.958	7.82594e-79	1	ANKRD44
4.17311e-83	0.316471	0.408	0.288	1.46977e-78	1	POM121C
2.11577e-82	0.300191	0.563	0.444	7.45173e-78	1	FAM53B
3.97814e-82	0.295991	0.56	0.437	1.4011e-77	1	SLC25A4
2.27443e-81	0.392769	0.424	0.301	8.01054e-77	1	CRY1
1.01761e-80	0.37114	0.499	0.384	3.58403e-76	1	UBL3
1.81919e-80	0.322309	0.363	0.242	6.40718e-76	1	CMAH
2.6994e-80	0.296174	0.431	0.294	9.50729e-76	1	MAMU-DRB1
3.3341e-80	0.313745	0.308	0.182	1.17427e-75	1	LOC704083
1.03115e-79	0.314273	0.371	0.249	3.63172e-75	1	LOC106997006
1.45963e-77	0.275615	0.721	0.61	5.1408e-73	1	TRPS1
8.35847e-77	0.319308	0.478	0.352	2.94385e-72	1	GALNT3
1.22456e-76	0.271749	0.794	0.685	4.3129e-72	1	LYST
2.65891e-76	0.291098	0.357	0.242	9.36469e-72	1	NISCH
6.83165e-76	0.252065	0.633	0.486	2.40611e-71	1	LOC106993126
1.58659e-75	0.301489	0.697	0.599	5.58798e-71	1	TRERF1
1.98215e-75	0.294862	0.79	0.724	6.98114e-71	1	CAST
8.18174e-75	0.370127	0.455	0.334	2.88161e-70	1	DAPK2
9.77594e-74	0.29267	0.506	0.395	3.44309e-69	1	CAPN2
1.78115e-73	0.290423	0.393	0.282	6.27319e-69	1	SRM
2.63186e-73	0.275306	0.313	0.201	9.26942e-69	1	CA5B
2.71089e-73	0.276396	0.752	0.676	9.54776e-69	1	LNPEP
3.4769e-73	0.27085	0.695	0.597	1.22456e-68	1	KAT2B
1.86909e-72	0.274352	0.831	0.777	6.58292e-68	1	HERC1
3.46529e-72	0.26118	0.918	0.88	1.22048e-67	1	VPS13B
9.24468e-72	0.34676	0.597	0.494	3.25597e-67	1	LOC695267
1.9638e-71	0.270294	0.793	0.652	6.91649e-67	1	S100A11
1.1483e-70	0.269376	0.363	0.252	4.04433e-66	1	SPN
1.64692e-70	0.272919	0.354	0.246	5.80044e-66	1	BCL9L
8.6418e-68	0.27421	0.83	0.773	3.04364e-63	1	STK39
2.00127e-67	0.262231	0.809	0.746	7.04846e-63	1	MPZL1
2.62089e-67	0.283438	0.554	0.458	9.23079e-63	1	HECA
1.54799e-66	0.308181	0.489	0.372	5.45202e-62	1	LOC708994
2.5291e-66	0.350895	0.514	0.403	8.9075e-62	1	MYO9A
2.10818e-65	0.268134	0.799	0.751	7.425e-61	1	DOCK11
2.95185e-64	0.269264	0.762	0.641	1.03964e-59	1	LOC106992647
4.65439e-64	0.408224	0.32	0.214	1.63927e-59	1	ADAM12
7.15982e-64	0.275753	0.691	0.615	2.52169e-59	1	UBR5
1.94196e-63	0.271858	0.691	0.618	6.83957e-59	1	URI1
3.66854e-63	0.367252	0.344	0.246	1.29206e-58	1	INPP5F
5.12149e-62	0.264798	0.558	0.438	1.80379e-57	1	PDE4D
7.0147e-62	0.292971	0.442	0.338	2.47058e-57	1	ULK2
1.56899e-61	0.287708	0.343	0.238	5.52599e-57	1	RNF144A
2.63064e-61	0.288347	0.444	0.343	9.26511e-57	1	VOPP1
4.54586e-61	0.29386	0.555	0.462	1.60105e-56	1	STAT5B
2.49643e-60	0.26431	0.799	0.749	8.79241e-56	1	LRRFIP1
5.8621e-60	0.426185	0.553	0.43	2.06463e-55	1	LOC100426197
1.39706e-59	0.265787	0.711	0.646	4.92044e-55	1	MARK3
2.45405e-59	0.344227	0.389	0.283	8.64316e-55	1	FER
4.20058e-59	0.291774	0.362	0.258	1.47944e-54	1	MXI1
9.39047e-59	0.299833	0.742	0.662	3.30732e-54	1	GLCCI1
1.06719e-58	0.3537	0.63	0.546	3.75864e-54	1	EHBP1
2.71578e-58	0.263144	0.301	0.204	9.56496e-54	1	MAMU-DPB
3.53292e-57	0.372716	0.609	0.534	1.24429e-52	1	LOC114671808
4.81994e-57	0.251268	0.442	0.348	1.69758e-52	1	CDC42SE1
1.47735e-55	0.274027	0.27	0.179	5.20323e-51	1	STAMBPL1
4.07067e-55	0.308357	0.568	0.481	1.43369e-50	1	RSU1
2.65768e-53	0.331357	0.684	0.607	9.36034e-49	1	BCAS3
8.09877e-53	0.317982	0.585	0.518	2.85239e-48	1	EHMT1
1.4812e-52	0.25412	0.747	0.678	5.21679e-48	1	KAT6B
2.32989e-51	0.291553	0.384	0.283	8.20587e-47	1	PLEKHA5
9.77258e-51	0.292935	0.483	0.39	3.4419e-46	1	KIF1B
1.55145e-50	0.271435	0.433	0.345	5.46421e-46	1	WDFY1
1.81119e-50	0.260457	0.57	0.497	6.379e-46	1	GNAI3
3.7172e-50	0.273294	0.467	0.374	1.3092e-45	1	RNF125
4.60059e-50	0.272675	0.53	0.442	1.62033e-45	1	APC
8.63981e-50	0.266852	0.372	0.286	3.04294e-45	1	TBPL1
9.02685e-49	0.302141	0.518	0.434	3.17926e-44	1	CSPP1
1.95678e-48	0.270567	0.625	0.546	6.89179e-44	1	HIVEP1
1.03004e-47	0.261882	0.45	0.362	3.62779e-43	1	TSPO
2.76376e-47	0.257846	0.279	0.198	9.73396e-43	1	SERTAD3
2.04762e-45	0.253867	0.81	0.761	7.21172e-41	1	ARL15
4.29104e-45	0.306011	0.448	0.356	1.5113e-40	1	HLCS
5.78859e-45	0.268855	0.718	0.657	2.03874e-40	1	FBXL17
1.21451e-44	0.277628	0.327	0.247	4.27749e-40	1	CCDC167
1.31424e-44	0.284519	0.403	0.32	4.62875e-40	1	ADIPOR2
3.23942e-44	0.279916	0.658	0.587	1.14093e-39	1	BTBD9
3.99017e-44	0.258954	0.603	0.527	1.40534e-39	1	RASSF3
2.04118e-41	0.258798	0.618	0.552	7.18903e-37	1	RB1
1.63548e-39	0.283963	0.461	0.388	5.76016e-35	1	MSH3
1.47652e-38	0.263147	0.362	0.275	5.20029e-34	1	PAM
4.41026e-36	0.285667	0.47	0.404	1.55329e-31	1	LOC705946
7.97639e-33	0.338559	0.521	0.462	2.80928e-28	1	CAMKMT
6.60998e-31	0.318608	0.604	0.563	2.32803e-26	1	RRAS2
5.50222e-20	0.263248	0.295	0.24	1.93788e-15	1	MAMU-DRA

## Sheet: Cluster 2
p_val	avg_log2FC	pct.1	pct.2	p_val_adj	cluster	gene
0	3.11539	0.862	0.182	0	2	STMN1
0	2.84265	0.728	0.186	0	2	LOC114677671
0	2.70735	0.83	0.075	0	2	MKI67
0	2.56647	0.929	0.489	0	2	HMGB2
0	2.41903	0.781	0.252	0	2	HIST1H1D
0	2.22459	0.891	0.564	0	2	TUBA1B
0	2.03838	0.884	0.353	0	2	LOC114673461
0	1.98171	0.826	0.403	0	2	TUBB
0	1.89961	0.598	0.042	0	2	TOP2A
0	1.8962	0.656	0.023	0	2	DIAPH3
0	1.80151	0.882	0.365	0	2	ADORA2B
0	1.76949	0.719	0.304	0	2	GZMA
0	1.76631	0.599	0.025	0	2	RRM2
0	1.74397	0.811	0.585	0	2	H2AFZ
0	1.72072	0.519	0.015	0	2	ASPM
0	1.69971	0.613	0.019	0	2	PCLAF
0	1.69643	0.629	0.129	0	2	CENPF
0	1.6814	0.856	0.386	0	2	SMC4
0	1.66621	0.534	0.041	0	2	HIST1H1B
0	1.66009	0.669	0.141	0	2	CKS2
0	1.62266	0.898	0.371	0	2	LOC114673210
0	1.58531	0.645	0.048	0	2	CENPP
0	1.52212	0.703	0.206	0	2	PCNA
0	1.5198	0.573	0.028	0	2	CIT
0	1.5183	0.578	0.028	0	2	NUSAP1
0	1.51488	0.79	0.232	0	2	EZH2
0	1.4679	0.588	0.12	0	2	LOC114678430
0	1.41234	0.583	0.026	0	2	KIF11
0	1.40494	0.844	0.337	0	2	LOC106996415
0	1.39566	0.62	0.214	0	2	LAMP3
0	1.38392	0.835	0.453	0	2	BMT2
0	1.38204	0.892	0.69	0	2	LOC705636
0	1.36929	0.75	0.166	0	2	LMNB1
0	1.35496	0.733	0.231	0	2	ATAD2
0	1.35408	0.656	0.236	0	2	TUBB4B
0	1.33756	0.821	0.357	0	2	TMPO
0	1.33619	0.666	0.391	0	2	HIST2H2AC
0	1.33326	0.556	0.061	0	2	CENPE
0	1.33065	0.681	0.077	0	2	SMC2
0	1.32684	0.574	0.014	0	2	SPC25
0	1.30617	0.901	0.715	0	2	HMGB1
0	1.30498	0.501	0.02	0	2	TYMS
0	1.28055	0.581	0.125	0	2	H2AFX
0	1.27786	0.582	0.042	0	2	KNL1
0	1.26736	0.785	0.475	0	2	RAN
0	1.25125	0.506	0.1	0	2	LOC701826
0	1.24927	0.561	0.025	0	2	BRCA2
0	1.24367	0.869	0.56	0	2	ANP32B
0	1.23468	0.787	0.499	0	2	SNRPB
0	1.22461	0.632	0.166	0	2	POLA1
0	1.22264	0.599	0.104	0	2	RFC3
0	1.20684	0.518	0.028	0	2	CDK1
0	1.2066	0.708	0.368	0	2	DUT
0	1.20613	0.746	0.269	0	2	NSD2
0	1.20269	0.543	0.018	0	2	KIF15
0	1.1988	0.871	0.614	0	2	ENO1
0	1.1886	0.633	0.073	0	2	NCAPG2
0	1.17938	0.596	0.071	0	2	MCM7
0	1.16915	0.855	0.459	0	2	C11H12orf75
0	1.15617	0.71	0.423	0	2	SLC25A5
0	1.14731	0.547	0.106	0	2	CKS1B
0	1.14016	0.956	0.68	0	2	GZMB
0	1.13836	0.606	0.224	0	2	UBE2S
0	1.12799	0.659	0.312	0	2	RPA3
0	1.12415	0.465	0.013	0	2	DLGAP5
0	1.11424	0.75	0.359	0	2	CALM3
0	1.11144	0.643	0.147	0	2	TACC3
0	1.10696	0.668	0.142	0	2	FANCI
0	1.10357	0.537	0.024	0	2	NUF2
0	1.10352	0.738	0.444	0	2	LOC696005
0	1.1007	0.558	0.025	0	2	KNTC1
0	1.09575	0.543	0.043	0	2	NCAPG
0	1.0927	0.638	0.182	0	2	HELLS
0	1.09126	0.902	0.785	0	2	GAPDH
0	1.08931	0.618	0.112	0	2	BRCA1
0	1.08864	0.505	0.026	0	2	DTL
0	1.0854	0.522	0.036	0	2	TPX2
0	1.08245	0.497	0.027	0	2	CENPW
0	1.06297	0.488	0.017	0	2	MELK
0	1.06015	0.862	0.548	0	2	DEK
0	1.05527	0.93	0.804	0	2	HSPA8
0	1.04803	0.49	0.106	0	2	LOC704341
0	1.03975	0.592	0.08	0	2	ITGB3BP
0	1.03652	0.512	0.054	0	2	BRIP1
0	1.03367	0.328	0.008	0	2	UBE2C
0	1.03171	0.559	0.221	0	2	PTTG1
0	1.03061	0.504	0.015	0	2	CLSPN
0	1.03025	0.53	0.045	0	2	MCM3
0	1.03022	0.746	0.304	0	2	DNMT1
0	1.02474	0.588	0.201	0	2	IFI27
0	1.00307	0.55	0.077	0	2	NCAPD2
0	0.998644	0.459	0.021	0	2	GTSE1
0	0.994194	0.407	0.024	0	2	LOC695427
0	0.986026	0.878	0.626	0	2	NUCKS1
0	0.980442	0.653	0.291	0	2	H2AFJ
0	0.980159	0.535	0.083	0	2	MMS22L
0	0.979424	0.514	0.05	0	2	POLQ
0	0.977922	0.445	0.012	0	2	BIRC5
0	0.977888	0.632	0.182	0	2	RBPMS
0	0.97362	0.727	0.402	0	2	WWOX
0	0.972269	0.495	0.021	0	2	CENPM
0	0.97151	0.425	0.015	0	2	SGO2
0	0.97078	0.442	0.027	0	2	CCNA2
0	0.968875	0.497	0.047	0	2	ZGRF1
0	0.966358	0.965	0.93	0	2	TMSB10
0	0.959303	0.527	0.066	0	2	ATAD5
0	0.953668	0.467	0.02	0	2	BUB1B
0	0.947738	0.718	0.265	0	2	RRM1
0	0.942366	0.525	0.068	0	2	KIF22
0	0.935976	0.588	0.226	0	2	SIVA1
0	0.935479	0.564	0.253	0	2	LOC706608
0	0.931096	0.531	0.068	0	2	KIFC1
0	0.924426	0.467	0.014	0	2	RAD51AP1
0	0.921197	0.488	0.122	0	2	LOC114679643
0	0.917906	0.91	0.883	0	2	PTMA
0	0.913012	0.499	0.064	0	2	NDC80
0	0.90877	0.405	0.012	0	2	KIF4A
0	0.907854	0.458	0.053	0	2	PRC1
0	0.906317	0.482	0.07	0	2	FBXO5
0	0.90144	0.529	0.076	0	2	CENPO
0	0.900223	0.477	0.018	0	2	CDT1
0	0.897302	0.635	0.234	0	2	HMGN2
0	0.897207	0.497	0.044	0	2	CHEK1
0	0.887153	0.479	0.028	0	2	CENPU
0	0.885602	0.633	0.219	0	2	CD38
0	0.883914	0.385	0.015	0	2	CDCA2
0	0.864846	0.598	0.191	0	2	KIF20B
0	0.863369	0.633	0.193	0	2	NCAPD3
0	0.860063	0.463	0.048	0	2	ARHGAP11A
0	0.85832	0.7	0.379	0	2	PSME2
0	0.856101	0.48	0.047	0	2	BARD1
0	0.853664	0.516	0.066	0	2	WDHD1
0	0.852976	0.451	0.052	0	2	MCM5
0	0.852237	0.602	0.17	0	2	LOC106998573
0	0.851707	0.697	0.337	0	2	SLBP
0	0.85076	0.647	0.346	0	2	SERPINB1
0	0.841401	0.604	0.255	0	2	RANBP1
0	0.831148	0.832	0.461	0	2	LOC106993126
0	0.828896	0.692	0.378	0	2	ANP32E
0	0.825958	0.739	0.431	0	2	IDH2
0	0.822946	0.549	0.115	0	2	WDR76
0	0.822821	0.593	0.194	0	2	MIS18BP1
0	0.820991	0.434	0.04	0	2	POLE
0	0.820073	0.924	0.82	0	2	CORO1A
0	0.816925	0.388	0.031	0	2	CDKN3
0	0.814213	0.814	0.534	0	2	UCP2
0	0.812352	0.752	0.38	0	2	RAD51B
0	0.807329	0.912	0.86	0	2	CFL1
0	0.798833	0.395	0.019	0	2	MXD3
0	0.794779	0.71	0.31	0	2	RNASEH2B
0	0.792524	0.631	0.279	0	2	LSM3
0	0.79242	0.552	0.146	0	2	ZNF367
0	0.789795	0.774	0.436	0	2	NASP
0	0.78464	0.422	0.034	0	2	MCM4
0	0.778541	0.453	0.035	0	2	UHRF1
0	0.77713	0.671	0.345	0	2	CEP192
0	0.77552	0.793	0.469	0	2	LBR
0	0.77304	0.689	0.342	0	2	SNRPD1
0	0.771523	0.319	0.018	0	2	CCNB2
0	0.769284	0.93	0.856	0	2	HSP90AA1
0	0.768355	0.778	0.5	0	2	RAD21
0	0.767468	0.457	0.081	0	2	STIL
0	0.760967	0.752	0.364	0	2	PRIM2
0	0.751556	0.791	0.505	0	2	PPP1CA
0	0.749263	0.613	0.219	0	2	LIN54
0	0.747469	0.395	0.012	0	2	MYBL2
0	0.747406	0.38	0.026	0	2	HMGB3
0	0.747343	0.549	0.247	0	2	LSM2
0	0.745541	0.45	0.041	0	2	CHAF1A
0	0.735789	0.478	0.068	0	2	LOC716070
0	0.733217	0.614	0.269	0	2	CENPX
0	0.728714	0.451	0.104	0	2	AURKB
0	0.727756	0.731	0.398	0	2	SMC3
0	0.723858	0.472	0.076	0	2	FANCA
0	0.721103	0.751	0.451	0	2	HNRNPAB
0	0.707106	0.397	0.019	0	2	RAD51
0	0.703934	0.309	0.011	0	2	KIF14
0	0.696375	0.457	0.088	0	2	MCM6
0	0.690302	0.331	0.01	0	2	TK1
0	0.688829	0.373	0.026	0	2	CDCA8
0	0.68812	0.39	0.13	0	2	HAVCR2
0	0.687023	0.321	0.013	0	2	HMMR
0	0.686323	0.648	0.281	0	2	CEP128
0	0.680444	0.465	0.071	0	2	DTYMK
0	0.680424	0.36	0.009	0	2	FOXM1
0	0.679253	0.379	0.039	0	2	INCENP
0	0.673095	0.373	0.023	0	2	TTK
0	0.672308	0.38	0.043	0	2	CKAP2L
0	0.671928	0.415	0.056	0	2	NCAPH
0	0.670014	0.496	0.153	0	2	ALYREF
0	0.669282	0.354	0.017	0	2	KIF23
0	0.668677	0.343	0.012	0	2	PARPBP
0	0.666958	0.578	0.185	0	2	CBX5
0	0.66641	0.351	0.071	0	2	LOC697977
0	0.659917	0.343	0.031	0	2	LOC705469
0	0.659618	0.562	0.18	0	2	SAE1
0	0.659386	0.503	0.111	0	2	TFDP1
0	0.657455	0.376	0.039	0	2	CIP2A
0	0.657014	0.374	0.064	0	2	ARHGAP19
0	0.655701	0.632	0.242	0	2	CENPK
0	0.655235	0.416	0.044	0	2	CENPN
0	0.654128	0.47	0.089	0	2	SASS6
0	0.651116	0.572	0.195	0	2	LOC114679371
0	0.648408	0.355	0.018	0	2	CDC6
0	0.647969	0.532	0.149	0	2	PHF19
0	0.647798	0.328	0.008	0	2	ANLN
0	0.645229	0.387	0.095	0	2	LOC710110
0	0.64138	0.333	0.022	0	2	HJURP
0	0.64121	0.428	0.108	0	2	CLIC4
0	0.627142	0.358	0.023	0	2	MCM10
0	0.626038	0.364	0.044	0	2	WDR62
0	0.625869	0.437	0.077	0	2	GMNN
0	0.617125	0.387	0.056	0	2	RNASEH2A
0	0.614406	0.37	0.037	0	2	CENPJ
0	0.613119	0.362	0.063	0	2	LOC704664
0	0.612787	0.341	0.014	0	2	E2F1
0	0.609536	0.523	0.159	0	2	DNAJC9
0	0.606911	0.43	0.095	0	2	MPHOSPH9
0	0.605892	0.295	0.033	0	2	ECT2
0	0.602075	0.42	0.093	0	2	LIG1
0	0.601242	0.543	0.191	0	2	NUDT1
0	0.597655	0.333	0.009	0	2	SGO1
0	0.596909	0.429	0.077	0	2	ORC6
0	0.596151	0.331	0.037	0	2	CCNE2
0	0.595482	0.339	0.009	0	2	SHCBP1
0	0.595173	0.614	0.279	0	2	MAZ
0	0.59435	0.38	0.049	0	2	DDX11
0	0.589406	0.336	0.024	0	2	GEN1
0	0.586981	0.289	0.017	0	2	CENPA
0	0.58609	0.345	0.019	0	2	CDC45
0	0.584696	0.481	0.192	0	2	TMSB15B
0	0.58395	0.589	0.25	0	2	USP1
0	0.583651	0.425	0.09	0	2	SKA2
0	0.58271	0.285	0.018	0	2	KNSTRN
0	0.578737	0.282	0.013	0	2	BUB1
0	0.576524	0.525	0.218	0	2	LSM5
0	0.575544	0.331	0.017	0	2	GINS2
0	0.57425	0.31	0.007	0	2	E2F8
0	0.573587	0.516	0.154	0	2	PGP
0	0.573463	0.319	0.007	0	2	CDCA5
0	0.573308	0.43	0.154	0	2	DCTPP1
0	0.568003	0.356	0.039	0	2	POLE2
0	0.565073	0.417	0.098	0	2	ISG15
0	0.56383	0.491	0.16	0	2	HDGF
0	0.56063	0.303	0.019	0	2	UBE2T
0	0.558644	0.289	0.011	0	2	ERCC6L
0	0.552358	0.425	0.114	0	2	CDC25B
0	0.551119	0.334	0.011	0	2	SPC24
0	0.549428	0.301	0.01	0	2	MND1
0	0.546297	0.286	0.007	0	2	CEP55
0	0.545094	0.355	0.027	0	2	POC1A
0	0.543386	0.289	0.01	0	2	KIF2C
0	0.542082	0.51	0.182	0	2	FDPS
0	0.541036	0.302	0.033	0	2	HIST1H2AD
0	0.538582	0.297	0.025	0	2	KIF18A
0	0.537355	0.44	0.11	0	2	PRIM1
0	0.537315	0.564	0.213	0	2	CCDC167
0	0.535765	0.396	0.074	0	2	NCAPH2
0	0.535294	0.398	0.074	0	2	LOC107000378
0	0.533206	0.378	0.059	0	2	GINS1
0	0.532497	0.393	0.078	0	2	LMNB2
0	0.530844	0.272	0.02	0	2	DEPDC1B
0	0.53016	0.415	0.089	0	2	RFC4
0	0.519198	0.26	0.007	0	2	NEIL3
0	0.513	0.265	0.009	0	2	CDC25C
0	0.512139	0.408	0.107	0	2	RBBP8
0	0.509151	0.289	0.007	0	2	ESCO2
0	0.507557	0.257	0.007	0	2	CDCA3
0	0.503982	0.361	0.092	0	2	HBA1
0	0.503398	0.279	0.012	0	2	TROAP
0	0.502799	0.291	0.008	0	2	PKMYT1
0	0.497121	0.379	0.064	0	2	HIRIP3
0	0.490039	0.372	0.07	0	2	LIN9
0	0.489671	0.339	0.085	0	2	LOC696808
0	0.489412	0.25	0.013	0	2	PRR11
0	0.488425	0.286	0.008	0	2	SPAG5
0	0.484663	0.326	0.068	0	2	LOC701574
0	0.482239	0.298	0.043	0	2	CKAP2
0	0.480758	0.294	0.02	0	2	RACGAP1
0	0.476657	0.266	0.016	0	2	CCDC150
0	0.47312	0.385	0.084	0	2	POLA2
0	0.469929	0.269	0.017	0	2	CENPI
0	0.460433	0.279	0.033	0	2	SLC29A1
0	0.459394	0.257	0.008	0	2	SKA3
0	0.454717	0.261	0.036	0	2	LOC106994082
0	0.451549	0.283	0.043	0	2	LOC705220
0	0.451035	0.255	0.007	0	2	E2F7
0	0.449382	0.299	0.06	0	2	CDKN2C
0	0.447192	0.342	0.085	0	2	CCDC18
0	0.44656	0.399	0.115	0	2	SSRP1
0	0.446352	0.307	0.043	0	2	LRR1
0	0.445429	0.442	0.155	0	2	FIBP
0	0.444653	0.382	0.084	0	2	LOC719437
0	0.4399	0.25	0.015	0	2	KIF24
0	0.43552	0.263	0.021	0	2	MCM2
0	0.415665	0.263	0.036	0	2	CCDC34
0	0.410947	0.446	0.16	0	2	DSN1
0	0.408548	0.318	0.079	0	2	MTBP
0	0.40762	0.305	0.085	0	2	RNF157
0	0.402976	0.31	0.054	0	2	CEP152
0	0.401158	0.314	0.06	0	2	WDR34
0	0.395651	0.313	0.062	0	2	MTFR2
0	0.391313	0.284	0.038	0	2	PLK4
0	0.390083	0.256	0.029	0	2	MASTL
0	0.385728	0.314	0.057	0	2	ZWILCH
0	0.382861	0.313	0.085	0	2	WEE1
0	0.382029	0.339	0.08	0	2	RAD18
0	0.379108	0.282	0.051	0	2	CHEK2
0	0.379071	0.259	0.019	0	2	FEN1
0	0.378364	0.295	0.059	0	2	ASF1B
0	0.376458	0.304	0.076	0	2	POLD2
0	0.372274	0.285	0.048	0	2	TTF2
0	0.37045	0.356	0.088	0	2	MIS18A
0	0.37019	0.328	0.088	0	2	HAUS4
0	0.366568	0.371	0.114	0	2	TPRKB
0	0.36578	0.309	0.082	0	2	LOC719262
0	0.353099	0.325	0.078	0	2	TEX30
0	0.339419	0.267	0.049	0	2	MCM8
0	0.338861	0.256	0.053	0	2	CEP85
0	0.334495	0.312	0.083	0	2	CDCA4
0	0.334286	0.336	0.09	0	2	MAD2L2
0	0.326443	0.254	0.045	0	2	NRM
0	0.308709	0.262	0.056	0	2	SAMD1
0	0.304011	0.291	0.075	0	2	APOBEC3D
7.17424e-308	0.430203	0.516	0.204	2.52677e-303	2	BCAP29
1.63348e-307	0.500615	0.466	0.18	5.75313e-303	2	RBM15
9.27676e-305	0.388643	0.377	0.124	3.26727e-300	2	DPM2
1.99552e-303	0.707086	0.697	0.372	7.02822e-299	2	FANCC
2.68079e-303	0.475373	0.506	0.203	9.44174e-299	2	C1H1orf35
1.29912e-301	0.261218	0.252	0.06	4.57551e-297	2	PDLIM7
1.02004e-300	0.607789	0.527	0.228	3.59259e-296	2	HMGA1
1.35769e-296	0.568206	0.614	0.296	4.78177e-292	2	CYC1
1.49696e-294	0.729266	0.655	0.379	5.2723e-290	2	ERH
3.94045e-294	0.395212	0.438	0.161	1.38783e-289	2	LOC114677681
4.65527e-294	0.52692	0.633	0.3	1.63959e-289	2	RABL6
1.34398e-293	0.756149	0.791	0.563	4.73349e-289	2	RBM3
3.52114e-293	0.639694	0.735	0.382	1.24014e-288	2	LOC114671905
4.8178e-293	0.738934	0.869	0.724	1.69683e-288	2	GPX4
1.74762e-291	0.640871	0.542	0.246	6.15512e-287	2	CKAP5
3.03818e-291	0.424534	0.496	0.199	1.07005e-286	2	RCC2
4.01153e-291	0.518307	0.95	0.926	1.41286e-286	2	HNRNPA2B1
1.62928e-290	1.00328	0.482	0.209	5.73832e-286	2	PLAC8
6.75031e-290	0.655748	0.62	0.329	2.37746e-285	2	NDUFB6
4.418e-289	0.3904	0.4	0.142	1.55602e-284	2	BRI3BP
2.26533e-288	0.412818	0.445	0.165	7.97848e-284	2	MTHFD2
1.28608e-287	0.469656	0.512	0.214	4.52958e-283	2	POLD3
7.34414e-287	0.624967	0.753	0.452	2.58661e-282	2	PKM
5.26352e-286	0.560531	0.625	0.304	1.85381e-281	2	RBL1
7.97131e-286	0.514271	0.617	0.295	2.8075e-281	2	RBBP7
5.41425e-285	0.32727	0.366	0.121	1.9069e-280	2	SNRPA
1.1233e-284	0.364926	0.46	0.175	3.95628e-280	2	PSMC3
2.32303e-284	0.668272	0.669	0.383	8.18172e-280	2	LOC694887
2.32927e-284	0.300432	0.26	0.068	8.20368e-280	2	NET1
8.3305e-283	0.388131	0.473	0.187	2.934e-278	2	C5H4orf27
9.29844e-283	0.321699	0.359	0.117	3.27491e-278	2	MRPL28
9.58904e-281	0.475489	0.433	0.166	3.37726e-276	2	TRAPPC6A
1.39768e-280	0.640341	0.742	0.429	4.92264e-276	2	SUZ12
7.13232e-279	0.395052	0.367	0.125	2.512e-274	2	CDK4
3.4515e-277	0.653621	0.768	0.527	1.21562e-272	2	CBX3
5.80644e-277	0.387759	0.386	0.137	2.04503e-272	2	MZT1
8.16793e-271	0.744709	0.71	0.43	2.87674e-266	2	APRT
3.85599e-270	0.419175	0.469	0.189	1.35808e-265	2	ILF2
8.83016e-270	0.624321	0.823	0.575	3.10998e-265	2	SRSF10
4.99686e-269	0.661441	0.853	0.704	1.75989e-264	2	ATP5F1D
9.83224e-269	0.486227	0.33	0.111	3.46292e-264	2	LOC722929
2.02938e-268	0.544079	0.584	0.268	7.14749e-264	2	PBX3
7.79616e-268	0.52692	0.503	0.216	2.74581e-263	2	SDF2L1
2.05308e-267	0.522642	0.623	0.315	7.23096e-263	2	UQCRC1
3.41684e-266	0.340109	0.327	0.104	1.20341e-261	2	CDC7
3.78848e-266	0.674236	0.581	0.285	1.3343e-261	2	LOC694372
1.5173e-265	0.48232	0.509	0.223	5.34392e-261	2	PCNT
4.22984e-265	0.517979	0.586	0.278	1.48975e-260	2	NDUFS8
2.66408e-264	0.625339	0.633	0.339	9.3829e-260	2	PSMA4
2.31729e-263	0.639238	0.604	0.329	8.1615e-259	2	SNRPG
3.35451e-263	0.401639	0.42	0.16	1.18146e-258	2	PAGR1
3.96259e-263	0.648105	0.612	0.338	1.39562e-258	2	RNASEH2C
1.15434e-262	0.373558	0.417	0.158	4.0656e-258	2	SLC2A4RG
4.20023e-260	0.533259	0.639	0.324	1.47932e-255	2	NUP210
6.17543e-260	0.794714	0.956	0.93	2.17499e-255	2	LOC705671
9.3366e-260	0.384644	0.384	0.139	3.28835e-255	2	SMS
3.54761e-259	0.464055	0.621	0.304	1.24947e-254	2	TOPBP1
1.57671e-257	0.42591	0.472	0.196	5.55316e-253	2	HPRT1
1.6978e-257	0.411648	0.461	0.188	5.97965e-253	2	ACOT7
6.27475e-256	0.628049	0.632	0.352	2.20997e-251	2	RBM8A
1.57331e-255	0.310766	0.327	0.107	5.54119e-251	2	EXOSC8
2.07675e-254	0.295293	0.345	0.116	7.3143e-250	2	PTPA
4.17557e-254	0.782557	0.926	0.899	1.47064e-249	2	PFN1
6.47814e-254	0.457728	0.296	0.095	2.2816e-249	2	RFX2
1.56542e-252	0.372388	0.373	0.135	5.51342e-248	2	ZDHHC12
6.52542e-252	0.427846	0.501	0.218	2.29825e-247	2	CEP295
1.35702e-251	0.358025	0.415	0.158	4.77941e-247	2	DBF4
8.70058e-251	0.587165	0.665	0.366	3.06434e-246	2	CENPC
9.03797e-251	0.394452	0.464	0.191	3.18317e-246	2	HMGXB4
6.53662e-249	0.344497	0.38	0.14	2.3022e-244	2	ACYP1
2.9737e-248	0.467216	0.575	0.279	1.04734e-243	2	SUMO3
3.26464e-248	0.281725	0.284	0.086	1.14981e-243	2	USP18
1.42392e-247	0.272955	0.263	0.075	5.01505e-243	2	HAUS8
3.32043e-246	0.291762	0.372	0.134	1.16946e-241	2	MGME1
3.30927e-244	0.56305	0.691	0.406	1.16552e-239	2	NDUFB7
5.61051e-244	0.698893	0.665	0.42	1.97602e-239	2	PSMB6
6.58038e-243	0.63491	0.69	0.434	2.31761e-238	2	ATP5IF1
2.30189e-242	0.864158	0.922	0.831	8.10725e-238	2	VIM
1.53291e-240	0.440872	0.569	0.27	5.39889e-236	2	RAD50
1.73009e-240	0.798444	0.901	0.851	6.09339e-236	2	UBB
2.3913e-240	0.33905	0.401	0.155	8.42217e-236	2	TRNAU1AP
2.78926e-239	0.665205	0.798	0.615	9.82376e-235	2	YBX1
4.76975e-239	0.278489	0.348	0.121	1.67991e-234	2	RAD51C
2.23263e-238	0.532309	0.696	0.408	7.86334e-234	2	TPM4
1.0568e-237	0.317211	0.275	0.085	3.72204e-233	2	FANCL
4.12724e-237	0.770653	0.733	0.511	1.45361e-232	2	LDHA
4.16446e-237	0.325204	0.406	0.159	1.46672e-232	2	MPDU1
4.75219e-236	0.517636	0.645	0.347	1.67372e-231	2	NDUFS6
5.34436e-236	0.623762	0.678	0.429	1.88228e-231	2	VDAC3
1.21402e-235	0.529458	0.618	0.321	4.27577e-231	2	LMO4
7.95807e-235	0.446606	0.583	0.283	2.80283e-230	2	B3GLCT
1.05332e-234	0.583337	0.581	0.311	3.70978e-230	2	DCTN3
6.20637e-234	0.599635	0.863	0.634	2.18589e-229	2	FLNA
1.59048e-232	0.408627	0.478	0.207	5.60167e-228	2	TUFM
2.32199e-232	0.614495	0.835	0.629	8.17804e-228	2	LSP1
1.20858e-231	0.264624	0.298	0.098	4.2566e-227	2	LMF2
2.19578e-231	0.624267	0.82	0.649	7.73352e-227	2	SET
2.89275e-231	0.365018	0.422	0.171	1.01883e-226	2	CTPS1
6.60956e-228	0.311618	0.434	0.174	2.32789e-223	2	LOC705327
1.44869e-227	0.452345	0.555	0.27	5.1023e-223	2	MRPS15
1.98614e-227	0.384457	0.43	0.177	6.99518e-223	2	ADA
1.88622e-226	0.517833	0.522	0.248	6.64327e-222	2	PRELID1
1.48009e-225	0.332351	0.41	0.163	5.21288e-221	2	BOLA3
1.62454e-225	0.511861	0.301	0.103	5.72161e-221	2	FABP5
1.69773e-223	0.384029	0.45	0.192	5.9794e-219	2	NDUFV1
5.91926e-223	0.490858	0.517	0.245	2.08476e-218	2	THY1
7.69786e-223	0.386256	0.443	0.19	2.71119e-218	2	PFKL
1.02799e-222	0.372729	0.475	0.209	3.6206e-218	2	FAM111A
2.22064e-221	0.294225	0.387	0.15	7.82111e-217	2	POLE3
5.67768e-221	0.314016	0.41	0.166	1.99968e-216	2	MTHFD1
1.01716e-220	0.521772	0.332	0.128	3.58245e-216	2	CDKN2D
4.74243e-220	0.485407	0.629	0.338	1.67028e-215	2	SMC1A
6.17938e-220	0.357948	0.451	0.196	2.17638e-215	2	AHSA2P
8.18506e-220	0.368809	0.477	0.209	2.88278e-215	2	INTS7
1.60575e-219	0.575314	0.776	0.533	5.65546e-215	2	RHEB
1.79563e-219	0.503386	0.599	0.323	6.32419e-215	2	IER3IP1
2.07441e-219	0.518415	0.761	0.492	7.30607e-215	2	DDX39A
3.73828e-219	0.291605	0.314	0.11	1.31662e-214	2	RANGAP1
4.50508e-219	0.486777	0.661	0.367	1.58669e-214	2	PPM1G
5.93893e-219	0.335689	0.419	0.171	2.09169e-214	2	CMAS
7.1555e-219	0.539364	0.77	0.526	2.52017e-214	2	HNRNPR
9.78991e-219	0.399603	0.526	0.245	3.44801e-214	2	HAT1
1.35285e-218	0.649607	0.831	0.664	4.76475e-214	2	PSMB8
1.69421e-218	0.924692	0.76	0.557	5.967e-214	2	LOC696872
2.66776e-218	0.29875	0.326	0.117	9.39586e-214	2	MSH2
2.10006e-217	0.432536	0.587	0.3	7.3964e-213	2	PTBP1
3.48137e-217	0.523217	0.545	0.28	1.22614e-212	2	LAGE3
4.36223e-217	0.328677	0.309	0.108	1.53638e-212	2	NME1
9.2042e-217	0.285711	0.318	0.112	3.24172e-212	2	CNP
1.6227e-216	0.418436	0.557	0.269	5.71514e-212	2	RASGRP2
5.2534e-216	0.471666	0.717	0.406	1.85025e-211	2	PSMD14
4.50245e-215	0.288748	0.303	0.104	1.58576e-210	2	CCP110
1.864e-214	0.349217	0.49	0.222	6.56502e-210	2	SNRPF
1.55929e-213	0.335657	0.453	0.195	5.49181e-209	2	LIN52
1.75298e-213	0.402063	0.516	0.243	6.17401e-209	2	AURKAIP1
2.81574e-213	0.293388	0.404	0.163	9.91704e-209	2	NELFE
3.57678e-212	0.409925	0.575	0.284	1.25974e-207	2	SLF1
1.31209e-211	0.769145	0.797	0.708	4.62118e-207	2	PSMB9
5.76435e-211	0.609342	0.553	0.276	2.0302e-206	2	IL12RB2
1.03759e-210	0.96627	0.951	0.911	3.65439e-206	2	ACTG1
2.99732e-209	0.491053	0.712	0.428	1.05566e-204	2	H2AFY
1.65397e-208	0.28533	0.363	0.14	5.82529e-204	2	RNF168
5.09267e-208	0.408376	0.559	0.282	1.79364e-203	2	AKR1A1
2.85892e-207	0.406749	0.528	0.253	1.00691e-202	2	AP2S1
3.24356e-207	0.65683	0.765	0.542	1.14238e-202	2	TPI1
2.17892e-206	0.347301	0.357	0.14	7.67417e-202	2	AKR7A2
7.868e-205	0.370581	0.442	0.194	2.77111e-200	2	TMEM109
2.33593e-204	0.28596	0.36	0.14	8.22714e-200	2	AKT1
4.58276e-203	0.561901	0.776	0.575	1.61405e-198	2	PCBP1
6.52177e-203	0.342496	0.469	0.212	2.29697e-198	2	CIAO2A
1.37643e-202	0.345089	0.412	0.177	4.8478e-198	2	BOLA2B
1.98307e-202	0.271924	0.281	0.096	6.98438e-198	2	ANAPC15
1.09862e-201	0.512393	0.7	0.432	3.86933e-197	2	ARHGDIA
1.27141e-201	0.320113	0.379	0.152	4.47789e-197	2	RAB24
2.08302e-201	0.500173	0.728	0.45	7.33639e-197	2	YWHAQ
4.65022e-201	0.268791	0.343	0.132	1.63781e-196	2	KMT5A
8.24644e-201	0.256956	0.273	0.092	2.9044e-196	2	TMEM70
2.52546e-199	0.295471	0.367	0.147	8.89465e-195	2	NUP155
3.27773e-199	0.471083	0.594	0.313	1.15441e-194	2	UBAP2
1.20413e-198	0.454252	0.569	0.302	4.24095e-194	2	CNIH4
1.76502e-198	0.518328	0.576	0.319	6.21641e-194	2	LOC696959
2.09314e-197	0.335803	0.453	0.202	7.37203e-193	2	COPS3
5.0532e-197	0.511055	0.649	0.383	1.77974e-192	2	PSMD8
3.11954e-196	0.387042	0.496	0.237	1.0987e-191	2	PSMB2
3.25105e-196	0.414105	0.623	0.337	1.14502e-191	2	RBM17
4.3964e-196	0.279554	0.349	0.136	1.54841e-191	2	DCPS
1.38061e-194	0.600915	0.798	0.592	4.86252e-190	2	ANXA2
2.50167e-194	0.556885	0.623	0.367	8.81089e-190	2	POMP
1.24964e-193	0.612174	0.686	0.478	4.40123e-189	2	NDUFB1
1.92621e-193	0.494709	0.68	0.42	6.78412e-189	2	NUDC
4.51734e-193	0.477257	0.586	0.307	1.59101e-188	2	NRIP1
8.74798e-193	0.340561	0.455	0.204	3.08104e-188	2	PMVK
1.17714e-192	0.416327	0.294	0.111	4.1459e-188	2	LOC114673092
1.27046e-192	0.393718	0.566	0.29	4.47455e-188	2	DAZAP1
4.28103e-192	0.379719	0.485	0.232	1.50778e-187	2	C16H17orf49
8.69391e-192	0.569732	0.696	0.439	3.06199e-187	2	CD74
1.34565e-191	0.361159	0.413	0.18	4.7394e-187	2	PHB
2.68313e-191	0.357104	0.499	0.239	9.45e-187	2	MRPL27
3.72237e-191	0.534082	0.814	0.624	1.31102e-186	2	SERBP1
3.9858e-191	0.34216	0.414	0.181	1.4038e-186	2	LOC712324
6.08279e-191	0.427335	0.604	0.329	2.14236e-186	2	SNF8
1.62445e-190	0.315865	0.293	0.108	5.7213e-186	2	BORA
4.14653e-190	0.426838	0.677	0.397	1.46041e-185	2	TMEM160
9.74249e-190	0.455902	0.886	0.759	3.4313e-185	2	RHOA
2.12089e-189	0.495186	0.636	0.37	7.46978e-185	2	PA2G4
2.25447e-189	0.347623	0.451	0.206	7.94025e-185	2	NAA38
2.85338e-189	0.378478	0.504	0.245	1.00496e-184	2	PTPMT1
3.2708e-189	0.292346	0.368	0.15	1.15197e-184	2	RRP7A
6.34295e-189	0.574491	0.709	0.508	2.23399e-184	2	COX6B1
9.00727e-189	0.29384	0.41	0.177	3.17236e-184	2	PAXX
2.34766e-188	0.405865	0.578	0.302	8.26846e-184	2	DDHD1
2.54932e-188	0.377533	0.491	0.238	8.97872e-184	2	PSMG2
9.80986e-188	0.632456	0.718	0.517	3.45503e-183	2	PSMA2
1.10442e-187	0.581478	0.622	0.4	3.88978e-183	2	NDUFB11
3.68352e-187	0.421421	0.534	0.271	1.29734e-182	2	PIN1
8.30282e-187	0.280577	0.345	0.135	2.92425e-182	2	CCDC124
9.54509e-186	0.278711	0.324	0.125	3.36178e-181	2	SLX1A
1.60741e-185	0.39401	0.383	0.164	5.66131e-181	2	FGFBP2
1.82123e-185	0.626641	0.824	0.682	6.41438e-181	2	LY6E-1
3.27649e-185	0.303981	0.454	0.21	1.15398e-180	2	TRIOBP
4.63463e-185	0.470782	0.558	0.302	1.63232e-180	2	NDUFA12
1.62311e-184	0.552547	0.584	0.331	5.71659e-180	2	BAX
1.65517e-184	0.454154	0.598	0.336	5.8295e-180	2	SNRNP25
4.33126e-184	0.504243	0.639	0.381	1.52547e-179	2	PPDPF
5.50856e-184	0.251804	0.29	0.105	1.94012e-179	2	UBR7
2.95778e-183	0.317526	0.428	0.192	1.04173e-178	2	ANKRD39
1.05354e-181	0.25273	0.31	0.117	3.71059e-177	2	MRPS11
1.56345e-181	0.463897	0.86	0.607	5.50647e-177	2	GZMH
3.93199e-181	0.311522	0.413	0.185	1.38485e-176	2	MRPL52
6.65801e-181	0.336201	0.395	0.175	2.34495e-176	2	POLH
1.08331e-180	0.375082	0.374	0.162	3.81542e-176	2	MRPL12
3.86789e-180	0.381664	0.51	0.258	1.36227e-175	2	MRPL13
4.93455e-180	0.369839	0.54	0.272	1.73795e-175	2	SMC6
5.22531e-180	0.322254	0.473	0.225	1.84035e-175	2	TRIM28
1.0702e-179	0.290528	0.312	0.121	3.76924e-175	2	EIF4EBP1
4.89572e-179	0.609428	0.673	0.481	1.72427e-174	2	SNRPD3
1.00882e-178	0.413133	0.591	0.32	3.55306e-174	2	USP37
3.54593e-178	0.345037	0.385	0.168	1.24888e-173	2	TRIM37
7.81668e-178	0.477341	0.608	0.366	2.75303e-173	2	SNRPE
1.73762e-177	0.588893	0.422	0.211	6.11989e-173	2	LOC697721
1.86599e-177	0.410065	0.616	0.345	6.57201e-173	2	PDAP1
9.09148e-177	0.266621	0.403	0.176	3.20202e-172	2	RECQL
1.69111e-176	0.396704	0.437	0.206	5.9561e-172	2	HEBP2
5.95718e-176	0.449188	0.543	0.292	2.09812e-171	2	UBALD2
2.00611e-175	0.278468	0.349	0.144	7.06551e-171	2	LOC716589
2.40215e-175	0.379539	0.553	0.289	8.46039e-171	2	BUD31
3.10658e-175	0.565751	0.643	0.414	1.09414e-170	2	MRPL51
8.12324e-175	0.325479	0.472	0.225	2.861e-170	2	ITGB1BP1
1.85152e-174	0.269912	0.416	0.185	6.52105e-170	2	PSMC1
4.87516e-174	0.426471	0.733	0.449	1.71703e-169	2	VRK1
8.71484e-174	0.400804	0.441	0.208	3.06937e-169	2	SFMBT1
1.85908e-173	0.293205	0.39	0.171	6.54766e-169	2	POLR3K
2.26403e-173	0.453167	0.609	0.35	7.97391e-169	2	CCT5
2.68737e-173	0.597561	0.563	0.314	9.46491e-169	2	SYNE2
3.01442e-173	0.387092	0.471	0.234	1.06168e-168	2	HINT2
7.57661e-173	0.442977	0.747	0.479	2.66848e-168	2	MYO1G
1.19374e-172	0.315727	0.423	0.194	4.20434e-168	2	RPA2
1.46514e-172	0.325469	0.571	0.302	5.16024e-168	2	ARPP19
2.44309e-172	0.492538	0.447	0.218	8.60457e-168	2	MAMU-DRA
4.29063e-172	0.319384	0.473	0.229	1.51116e-167	2	MFSD14B
2.6317e-171	0.419259	0.613	0.352	9.26885e-167	2	SUPT16H
4.28043e-171	0.314384	0.517	0.258	1.50757e-166	2	TUBGCP3
3.28295e-170	0.707514	0.77	0.626	1.15626e-165	2	TAGLN2
3.34982e-170	0.460529	0.602	0.352	1.17981e-165	2	ATP5F1C
3.40635e-170	0.338717	0.467	0.228	1.19972e-165	2	HSBP1
5.17734e-170	0.400188	0.49	0.249	1.82346e-165	2	GTF3C6
7.13926e-170	0.476924	0.884	0.808	2.51445e-165	2	LOC694289
1.01014e-169	0.257713	0.36	0.154	3.55771e-165	2	GUSBA
2.99676e-169	0.512082	0.73	0.526	1.05546e-164	2	RBX1
3.05786e-169	0.436899	0.705	0.454	1.07698e-164	2	GNB2
3.72532e-169	0.54234	0.537	0.289	1.31206e-164	2	JPT1
7.27276e-169	0.26881	0.366	0.156	2.56147e-164	2	EBNA1BP2
9.63932e-168	0.25602	0.351	0.148	3.39497e-163	2	LOC106994091
1.00471e-167	0.349047	0.448	0.215	3.5386e-163	2	SPATS2L
1.38044e-167	0.390071	0.672	0.392	4.8619e-163	2	RFC1
1.57751e-167	0.336535	0.392	0.175	5.556e-163	2	STOML2
3.60276e-167	0.403616	0.603	0.341	1.26889e-162	2	NDUFS7
4.13579e-167	0.478817	0.714	0.491	1.45662e-162	2	HMGN1
4.74545e-167	0.457572	0.551	0.309	1.67135e-162	2	PHPT1
2.64966e-166	0.253549	0.354	0.149	9.33211e-162	2	BTG3
3.22009e-166	0.449621	0.636	0.373	1.13411e-161	2	P4HB
6.16675e-166	0.523128	0.726	0.514	2.17193e-161	2	SRSF2
1.98474e-165	0.508975	0.706	0.481	6.99025e-161	2	MZT2B
2.65691e-165	0.293182	0.398	0.181	9.35763e-161	2	ACAT2
4.44909e-165	0.283776	0.378	0.165	1.56697e-160	2	PDZD11
1.29311e-164	0.269221	0.349	0.148	4.55435e-160	2	SLC16A3
4.28359e-164	0.367123	0.55	0.295	1.50868e-159	2	PSMB10
4.61371e-164	0.378	0.479	0.243	1.62495e-159	2	HIST1H2AC
6.48721e-164	0.513223	0.675	0.437	2.2848e-159	2	CLTA
1.47837e-163	0.251687	0.357	0.153	5.20682e-159	2	LOC100427190
2.18701e-163	0.318979	0.481	0.239	7.70263e-159	2	NUDT21
5.66143e-163	0.435601	0.561	0.313	1.99396e-158	2	PSMB3
8.02318e-163	0.367176	0.467	0.23	2.82577e-158	2	ZRANB3
1.55482e-162	0.496543	0.699	0.481	5.47608e-158	2	SNRPD2
1.68501e-162	0.305257	0.474	0.235	5.93462e-158	2	NOP56
2.62167e-162	0.333787	0.493	0.246	9.23352e-158	2	NDUFS2
6.89606e-162	0.283237	0.363	0.158	2.42879e-157	2	GLRX5
1.22312e-161	0.379477	0.567	0.305	4.30784e-157	2	MAST2
2.38426e-161	0.515493	0.926	0.891	8.39735e-157	2	ARPC2
2.83386e-161	0.303383	0.435	0.209	9.98087e-157	2	HAUS6
4.41976e-161	0.735343	0.664	0.5	1.55664e-156	2	TXN
5.03257e-161	0.547362	0.702	0.471	1.77247e-156	2	H1FX
6.62721e-161	0.402371	0.478	0.246	2.3341e-156	2	MRPL57
7.12286e-161	0.30801	0.433	0.206	2.50867e-156	2	PRDX3
1.96464e-160	0.506163	0.795	0.503	6.91946e-156	2	RAP1GAP2
1.42104e-159	0.436943	0.772	0.535	5.0049e-155	2	YWHAE
1.56108e-159	0.375755	0.621	0.353	5.49812e-155	2	RPN2
4.78156e-159	0.422614	0.481	0.254	1.68407e-154	2	COX20
7.35555e-158	0.341672	0.518	0.27	2.59063e-153	2	RPA1
2.19796e-157	0.260264	0.437	0.205	7.74122e-153	2	C7H15orf41
2.20695e-157	0.526108	0.721	0.559	7.77289e-153	2	COX7B
3.68031e-157	0.46826	0.831	0.682	1.2962e-152	2	HNRNPA3
4.67819e-157	0.310812	0.429	0.204	1.64766e-152	2	MRPL22
1.2818e-156	0.25595	0.434	0.204	4.5145e-152	2	LCLAT1
1.56537e-155	0.412477	0.592	0.34	5.51325e-151	2	PSMA6
2.08511e-155	0.255023	0.334	0.142	7.34376e-151	2	MED30
4.32143e-155	0.424105	0.676	0.44	1.52201e-150	2	NDUFA3
9.52409e-155	0.556542	0.296	0.121	3.35438e-150	2	LOC693820
1.2883e-154	0.434447	0.66	0.402	4.5374e-150	2	LRMP
4.068e-154	0.353959	0.341	0.153	1.43275e-149	2	MAMU-DRB5
9.52211e-154	0.445462	0.705	0.478	3.35369e-149	2	COPE
2.76471e-153	0.347385	0.408	0.195	9.73731e-149	2	CD7
2.49941e-152	0.266901	0.435	0.207	8.80293e-148	2	MRPL42
4.07097e-151	0.311571	0.464	0.233	1.4338e-146	2	ACP1
1.54053e-150	0.721146	0.779	0.647	5.42574e-146	2	CALM2
4.65448e-150	0.537541	0.744	0.567	1.63931e-145	2	LOC707227
5.27566e-150	0.308255	0.413	0.198	1.85809e-145	2	RFWD3
6.03397e-150	0.278529	0.435	0.212	2.12516e-145	2	TSPAN2
6.53605e-150	0.386848	0.605	0.354	2.302e-145	2	WDR1
1.52256e-149	0.327193	0.472	0.239	5.36244e-145	2	ADRM1
3.31374e-149	0.327774	0.573	0.314	1.1671e-144	2	PPP4C
1.57098e-148	0.310578	0.512	0.267	5.53299e-144	2	UFD1
2.21121e-148	0.408335	0.721	0.467	7.78788e-144	2	RTN3
2.43182e-148	0.428196	0.564	0.323	8.56487e-144	2	HSPD1
3.75246e-148	0.373063	0.53	0.284	1.32162e-143	2	CARHSP1
1.54422e-147	0.360715	0.603	0.357	5.43873e-143	2	LOC701223
1.76775e-147	0.293082	0.551	0.298	6.22601e-143	2	ZFP91
3.52167e-147	0.498492	0.644	0.418	1.24033e-142	2	PYCARD
1.07563e-146	0.346077	0.467	0.236	3.78838e-142	2	NDUFS3
1.77274e-145	0.469127	0.794	0.569	6.24358e-141	2	PRF1
1.82043e-145	0.403837	0.617	0.375	6.41156e-141	2	MRPL23
9.12654e-145	0.396327	0.527	0.297	3.21437e-140	2	PHF5A
4.78485e-144	0.308467	0.543	0.296	1.68522e-139	2	PSMD4
7.10054e-144	0.265805	0.4	0.191	2.50081e-139	2	APOL5
1.35433e-143	0.413874	0.551	0.323	4.76995e-139	2	ANAPC11
1.83244e-143	0.264518	0.416	0.201	6.45384e-139	2	TXN2
3.34793e-143	0.447368	0.793	0.608	1.17914e-138	2	U2AF1
8.90803e-143	0.379487	0.901	0.808	3.13741e-138	2	IFI16
1.37509e-142	0.322407	0.484	0.255	4.84306e-138	2	HSD17B10
2.13262e-142	0.563299	0.843	0.781	7.5111e-138	2	EMP3
3.33723e-142	0.277566	0.505	0.265	1.17537e-137	2	GSDMD
3.76351e-142	0.383491	0.738	0.487	1.32551e-137	2	XPO1
8.05632e-142	0.300162	0.41	0.199	2.83744e-137	2	MLEC
2.44953e-141	0.439823	0.74	0.546	8.62725e-137	2	NDUFA1
3.198e-140	0.274559	0.403	0.193	1.12634e-135	2	MRPL47
6.21134e-140	0.266418	0.423	0.21	2.18764e-135	2	MCMBP
8.66281e-140	0.392054	0.502	0.273	3.05104e-135	2	NHP2
7.65848e-139	0.37874	0.482	0.264	2.69732e-134	2	TRAPPC1
1.59471e-138	0.444143	0.831	0.648	5.61657e-134	2	HNRNPD
1.92492e-138	0.278607	0.481	0.249	6.77958e-134	2	PSMD2
1.98415e-138	0.313815	0.54	0.302	6.98819e-134	2	DHX15
3.33364e-138	0.267049	0.387	0.185	1.17411e-133	2	MRPS14
5.44781e-138	0.340027	0.519	0.284	1.91872e-133	2	NAA10
6.63814e-138	0.488311	0.546	0.34	2.33795e-133	2	ATP5MC3
8.15782e-138	0.262891	0.444	0.22	2.87318e-133	2	UBE2E3
1.44759e-137	0.344109	0.551	0.315	5.0984e-133	2	EIF4A3
1.50906e-137	0.428194	0.868	0.763	5.31491e-133	2	YWHAB
1.74482e-137	0.309731	0.591	0.339	6.14526e-133	2	CMC2
1.50406e-136	0.257395	0.333	0.149	5.2973e-132	2	RBFA
1.51201e-136	0.342428	0.629	0.378	5.32529e-132	2	HDAC1
2.15662e-136	0.265763	0.428	0.215	7.59561e-132	2	MPST
2.65029e-136	0.317053	0.557	0.311	9.33431e-132	2	PSMC5
3.8595e-136	0.384366	0.564	0.323	1.35932e-131	2	CDK5RAP2
1.6051e-135	0.275672	0.434	0.217	5.65315e-131	2	MAP7D1
1.85624e-135	0.5852	0.726	0.618	6.53768e-131	2	SUMO2
3.3238e-135	0.273206	0.441	0.222	1.17064e-130	2	PPIH
1.71009e-134	0.27412	0.486	0.255	6.02294e-130	2	RBBP4
1.86732e-134	0.281911	0.39	0.193	6.57669e-130	2	VPS37B
2.04511e-134	0.4006	0.605	0.379	7.20289e-130	2	TALDO1
2.67375e-134	0.444681	0.81	0.619	9.41695e-130	2	CLEC2B
3.34644e-134	0.346291	0.613	0.37	1.17862e-129	2	BUB3
4.83504e-134	0.368403	0.605	0.368	1.7029e-129	2	MDH1
4.86136e-134	0.449694	0.758	0.527	1.71217e-129	2	PDS5B
2.01577e-133	0.427153	0.71	0.487	7.09953e-129	2	ARPC5L
3.05841e-132	0.416605	0.708	0.467	1.07717e-127	2	BAZ1B
1.50422e-131	0.265462	0.382	0.184	5.29785e-127	2	MRPS18C
3.99966e-131	0.257574	0.479	0.252	1.40868e-126	2	NMI
4.6141e-131	0.250985	0.498	0.266	1.62508e-126	2	NAPA
6.41223e-131	0.309508	0.51	0.285	2.25839e-126	2	LSM8
7.23208e-131	0.317897	0.461	0.242	2.54714e-126	2	EBP
1.26142e-130	0.327876	0.465	0.246	4.44271e-126	2	TRAPPC5
2.20331e-130	0.334674	0.582	0.344	7.76005e-126	2	PSMD13
9.27245e-130	0.312478	0.666	0.417	3.26576e-125	2	YWHAH
3.77565e-129	0.293828	0.567	0.323	1.32979e-124	2	CSK
4.07275e-129	0.463557	0.624	0.409	1.43442e-124	2	COX5A
4.25125e-129	0.292084	0.42	0.215	1.49729e-124	2	DUSP5
4.31265e-129	0.482709	0.631	0.425	1.51891e-124	2	LSM4
5.263e-129	0.413995	0.621	0.401	1.85363e-124	2	SRSF9
2.06997e-128	0.340525	0.662	0.412	7.29042e-124	2	LOC719250
3.6309e-128	0.277372	0.313	0.144	1.2788e-123	2	ITGB7
5.43614e-128	0.288189	0.553	0.312	1.91461e-123	2	TAP1
5.82923e-127	0.399208	0.845	0.676	2.05306e-122	2	TRA2B
2.60169e-126	0.328452	0.619	0.377	9.16314e-122	2	ABHD17A
3.36311e-126	0.29424	0.561	0.321	1.18449e-121	2	MRPS16
5.47256e-126	0.367989	0.643	0.426	1.92744e-121	2	PTPRCAP
3.45799e-125	0.251319	0.44	0.228	1.2179e-120	2	GLE1
5.6546e-125	0.377305	0.694	0.486	1.99155e-120	2	ATP5ME
7.58859e-125	0.295351	0.484	0.26	2.6727e-120	2	ALMS1
2.40961e-124	0.445911	0.658	0.44	8.48665e-120	2	EIF4A1
1.02922e-123	0.319809	0.604	0.363	3.62491e-119	2	ILF3
1.38964e-123	0.345013	0.576	0.347	4.89433e-119	2	SMIM7
2.17484e-123	0.317937	0.577	0.335	7.65979e-119	2	UBE2N
2.76293e-123	0.568653	0.65	0.51	9.73104e-119	2	BANF1
4.2938e-123	0.422446	0.627	0.416	1.51228e-118	2	APOBEC3G
4.99761e-123	0.31751	0.327	0.157	1.76016e-118	2	STX2
1.66358e-122	0.259202	0.51	0.28	5.85911e-118	2	RNPS1
1.66684e-122	0.322018	0.703	0.454	5.87061e-118	2	ATP1B3
2.0076e-122	0.360427	0.625	0.395	7.07077e-118	2	ATP5F1B
2.15373e-122	0.382141	0.645	0.414	7.58545e-118	2	VDAC2
2.87477e-122	0.300726	0.557	0.322	1.01249e-117	2	BID
1.05473e-121	0.268178	0.489	0.267	3.71476e-117	2	PFDN6
1.23417e-121	0.317248	0.641	0.396	4.34675e-117	2	NONO
1.45001e-121	0.291769	0.567	0.328	5.10695e-117	2	IPO9
4.61264e-121	0.340613	0.641	0.404	1.62457e-116	2	IRF3
1.87021e-120	0.561035	0.794	0.728	6.58686e-116	2	PSMA7
1.12964e-119	0.267509	0.46	0.245	3.9786e-115	2	ELAVL1
7.45425e-119	0.487297	0.66	0.501	2.62539e-114	2	NDUFB4
1.14581e-118	0.3755	0.546	0.333	4.03555e-114	2	MPC2
1.15983e-118	0.490794	0.93	0.904	4.08491e-114	2	ARHGDIB
1.23476e-118	0.400087	0.584	0.365	4.34882e-114	2	PSMA3
1.27574e-118	0.397045	0.609	0.397	4.49316e-114	2	LSM7
1.61512e-118	0.322309	0.425	0.228	5.68844e-114	2	MT2A
1.70217e-118	0.271546	0.437	0.228	5.99503e-114	2	S1PR4
4.43982e-118	0.415022	0.595	0.384	1.5637e-113	2	PARK7
6.18113e-118	0.34362	0.573	0.343	2.17699e-113	2	GALNT3
8.48937e-118	0.257843	0.436	0.227	2.98996e-113	2	TIMM17A
1.3227e-117	0.388185	0.845	0.72	4.65853e-113	2	HNRNPF
2.88315e-117	0.25074	0.493	0.273	1.01544e-112	2	AP1M1
5.00922e-117	0.647287	0.641	0.452	1.76425e-112	2	RPL22L1
2.05963e-116	0.327325	0.643	0.414	7.25403e-112	2	IFI6
2.13077e-116	0.348943	0.602	0.368	7.50458e-112	2	TXNL4A
2.71595e-116	0.336633	0.658	0.441	9.56558e-112	2	LOC699443
4.2624e-116	0.326321	0.495	0.283	1.50122e-111	2	MRPS12
5.68757e-116	0.375545	0.8	0.599	2.00316e-111	2	CYTIP
1.29795e-115	0.328136	0.587	0.348	4.57139e-111	2	ANKRD28
2.302e-115	0.282141	0.56	0.326	8.10766e-111	2	RAD23A
2.87361e-115	0.337787	0.685	0.453	1.01208e-110	2	SSBP4
4.05011e-115	0.290744	0.542	0.312	1.42645e-110	2	GUK1
1.48072e-114	0.38699	0.597	0.384	5.21511e-110	2	SRP9
2.20531e-114	0.259944	0.55	0.312	7.7671e-110	2	PSMD1
2.965e-114	0.348036	0.653	0.417	1.04427e-109	2	SCLT1
3.5827e-114	0.407137	0.748	0.522	1.26183e-109	2	CTCF
4.61465e-114	0.350245	0.598	0.365	1.62528e-109	2	LMAN2
6.41577e-114	0.511323	0.703	0.605	2.25963e-109	2	COX8A
1.1749e-113	0.290549	0.612	0.378	4.138e-109	2	UBE2L3
3.20425e-113	0.403692	0.638	0.436	1.12854e-108	2	RTRAF
1.33742e-112	0.498476	0.914	0.832	4.71041e-108	2	STAG1
1.50921e-112	0.399021	0.698	0.523	5.31544e-108	2	ROMO1
2.06844e-112	0.416799	0.607	0.407	7.28504e-108	2	MRPL41
4.34998e-112	0.282664	0.568	0.34	1.53206e-107	2	ELOC
5.79286e-112	0.279234	0.645	0.405	2.04024e-107	2	HNRNPL
1.6352e-111	0.339582	0.609	0.384	5.75917e-107	2	EIF5A
7.15145e-111	0.264695	0.532	0.307	2.51874e-106	2	CBX1
3.46146e-110	0.280907	0.604	0.367	1.21912e-105	2	SRPK1
5.03042e-110	0.320896	0.581	0.362	1.77171e-105	2	NDUFA6
1.32659e-109	0.276692	0.477	0.273	4.67224e-105	2	POLR2K
2.24832e-109	0.46905	0.795	0.672	7.9186e-105	2	ARPC5
3.04531e-109	0.405444	0.763	0.583	1.07256e-104	2	PSMB7
4.61269e-109	0.269316	0.489	0.272	1.62459e-104	2	PUF60
7.936e-109	0.328473	0.681	0.446	2.79506e-104	2	KPNB1
8.14776e-109	0.250039	0.485	0.271	2.86964e-104	2	SETBP1
4.98275e-108	0.364135	0.805	0.615	1.75492e-103	2	XRCC5
9.22158e-107	0.307193	0.482	0.277	3.24784e-102	2	RGS3
2.51517e-106	0.757561	0.671	0.493	8.85843e-102	2	ARL6IP1
6.16305e-106	0.257554	0.546	0.325	2.17063e-101	2	APMAP
1.62584e-105	0.293674	0.569	0.353	5.72622e-101	2	MAGOH
1.65213e-105	0.27137	0.601	0.368	5.81882e-101	2	SNX3
2.95097e-105	0.307327	0.602	0.384	1.03933e-100	2	POLR2J
4.81799e-105	0.320515	0.459	0.261	1.6969e-100	2	PRDX1
6.36787e-105	0.391541	0.837	0.71	2.24276e-100	2	LOC696748
7.90897e-104	0.269023	0.492	0.279	2.78554e-99	2	UQCC3
1.47456e-103	0.291069	0.29	0.141	5.19338e-99	2	STK3
3.99612e-103	0.305772	0.592	0.37	1.40743e-98	2	SLC20A1
6.16658e-103	0.263621	0.573	0.346	2.17187e-98	2	SMARCE1
3.21402e-102	0.323244	0.57	0.352	1.13198e-97	2	LOC713572
4.50323e-102	0.31362	0.387	0.21	1.58604e-97	2	LARGE1
7.408e-102	0.280434	0.661	0.432	2.6091e-97	2	MAPRE1
3.83514e-101	0.412912	0.781	0.688	1.35074e-96	2	IFI27L2
8.09615e-101	0.459615	0.72	0.581	2.85146e-96	2	DBI
2.3189e-100	0.42432	0.683	0.527	8.16718e-96	2	SEM1
2.79625e-100	0.307613	0.563	0.348	9.84839e-96	2	FKBP2
2.56671e-99	0.287989	0.633	0.402	9.03996e-95	2	CBFB
3.95661e-99	0.34281	0.576	0.366	1.39352e-94	2	EIF3I
9.14766e-99	0.350353	0.653	0.452	3.22181e-94	2	UBE2I
1.03205e-98	0.298699	0.552	0.345	3.63489e-94	2	COX17
1.10201e-98	0.257107	0.479	0.277	3.88129e-94	2	ABHD17B
9.81567e-98	0.266855	0.48	0.28	3.45708e-93	2	PDCD5
2.47151e-97	0.467924	0.548	0.371	8.70467e-93	2	NUCB2
3.10078e-97	0.456703	0.748	0.662	1.0921e-92	2	ATP5MPL
2.05624e-96	0.305628	0.519	0.32	7.24208e-92	2	MRPL34
2.90213e-96	0.364844	0.715	0.545	1.02213e-91	2	EDF1
2.10038e-95	0.253632	0.436	0.245	7.39755e-91	2	SPN
2.4469e-95	0.297954	0.562	0.348	8.61797e-91	2	CCDC85B
6.15756e-95	0.271367	0.555	0.343	2.16869e-90	2	UFC1
8.6331e-95	0.283842	0.604	0.384	3.04058e-90	2	ATP2A3
1.31714e-94	0.259439	0.708	0.481	4.63898e-90	2	PSMA1
1.52254e-94	0.274312	0.705	0.473	5.3624e-90	2	EWSR1
1.62076e-94	0.25209	0.423	0.237	5.70831e-90	2	AP1S1
1.21086e-93	0.27588	0.5	0.295	4.26465e-89	2	LOC100427957
1.41032e-93	0.261688	0.641	0.422	4.96715e-89	2	BSG
2.47629e-93	0.361992	0.59	0.406	8.72149e-89	2	NDUFC2
4.47733e-93	0.343219	0.874	0.762	1.57692e-88	2	TPM3
4.9412e-93	0.306769	0.601	0.393	1.74029e-88	2	ENY2
1.10614e-91	0.426276	0.686	0.546	3.89584e-87	2	NEDD8
1.11151e-91	0.35022	0.606	0.395	3.91474e-87	2	LOC694064
3.21029e-91	0.25504	0.495	0.296	1.13066e-86	2	TRAPPC4
5.2869e-91	0.274534	0.594	0.382	1.86205e-86	2	CCT2
7.44525e-91	0.425005	0.641	0.5	2.62222e-86	2	ATP5MF
2.15213e-90	0.416555	0.69	0.541	7.57981e-86	2	PSMB1
6.9077e-90	0.281668	0.548	0.343	2.43289e-85	2	ANXA5
2.68226e-89	0.252117	0.555	0.342	9.44694e-85	2	SRSF1
5.76019e-89	0.345064	0.59	0.395	2.02874e-84	2	CDK2AP2
9.55219e-89	0.323255	0.622	0.43	3.36428e-84	2	DDOST
2.67398e-88	0.313089	0.323	0.172	9.41777e-84	2	PPP1R14B
3.26071e-88	0.311001	0.416	0.24	1.14842e-83	2	C1QBP
8.30513e-88	0.328127	0.715	0.556	2.92507e-83	2	ELOB
1.04572e-87	0.557467	0.878	0.863	3.68302e-83	2	CRIP1
3.86955e-87	0.356011	0.613	0.417	1.36285e-82	2	ATP5PB
1.49195e-86	0.309792	0.622	0.419	5.25466e-82	2	CCT3
1.53301e-86	0.497433	0.586	0.437	5.39926e-82	2	HSPE1
2.21967e-86	0.533734	0.948	0.946	7.81768e-82	2	KEG06-p11
2.35692e-86	0.399346	0.289	0.156	8.30108e-82	2	MAMU-DQA1
4.54776e-86	0.297391	0.716	0.513	1.60172e-81	2	ARPC4
1.02534e-85	0.289941	0.772	0.557	3.61125e-81	2	RALY
6.5757e-84	0.277927	0.663	0.473	2.31596e-79	2	PET100
8.04722e-84	0.254288	0.476	0.291	2.83423e-79	2	NDUFAB1
2.13143e-83	0.313376	0.532	0.344	7.50689e-79	2	TAF10
6.09116e-83	0.258557	0.58	0.381	2.14531e-78	2	EFHD2
9.42518e-83	0.41284	0.751	0.656	3.31955e-78	2	UQCRH
1.04e-82	0.333124	0.712	0.502	3.66288e-78	2	GRK5
1.04189e-82	0.275989	0.481	0.297	3.66954e-78	2	CNN2
1.2985e-82	0.261872	0.458	0.277	4.5733e-78	2	SRM
1.40313e-82	0.324352	0.764	0.556	4.94181e-78	2	DDX46
4.2983e-82	0.379691	0.775	0.606	1.51386e-77	2	HP1BP3
2.96219e-81	0.253314	0.5	0.305	1.04328e-76	2	MRPS26
6.8408e-81	0.299541	0.661	0.469	2.40933e-76	2	NDUFA13
1.83559e-80	0.467592	0.898	0.844	6.46496e-76	2	NKG7
2.13355e-80	0.341783	0.587	0.414	7.51435e-76	2	DAD1
3.62153e-80	0.384522	0.542	0.361	1.2755e-75	2	GPRIN3
6.77099e-80	0.283653	0.778	0.605	2.38474e-75	2	XRCC6
2.03329e-79	0.431792	0.597	0.431	7.16124e-75	2	RPS27L
2.04755e-79	0.260656	0.763	0.559	7.21148e-75	2	BRD7
4.72735e-79	0.274214	0.627	0.424	1.66497e-74	2	PPP1CC
7.05887e-79	0.485238	0.785	0.768	2.48613e-74	2	HINT1
1.45775e-78	0.366107	0.712	0.551	5.1342e-74	2	SLC25A3
1.58024e-78	0.268591	0.517	0.332	5.5656e-74	2	POLE4
5.03081e-78	0.277686	0.733	0.531	1.77185e-73	2	PTP4A2
1.06978e-77	0.442752	0.819	0.783	3.76778e-73	2	MYL6
1.51266e-77	0.253036	0.7	0.478	5.32759e-73	2	SARNP
6.54773e-77	0.358418	0.455	0.297	2.30611e-72	2	MAMU-DRB1
1.40815e-76	0.307975	0.928	0.894	4.9595e-72	2	LOC704104
2.79633e-75	0.27578	0.547	0.368	9.84868e-71	2	NDUFA7
5.32038e-75	0.250186	0.435	0.265	1.87384e-70	2	G2E3
5.54633e-75	0.45118	0.661	0.596	1.95342e-70	2	GNG5
2.92025e-74	0.305322	0.58	0.402	1.02851e-69	2	LSM6
4.85028e-74	0.292599	0.748	0.548	1.70827e-69	2	KLF2
5.64244e-74	0.283315	0.641	0.437	1.98727e-69	2	CREM
1.57296e-73	0.323632	0.705	0.57	5.53995e-69	2	NDUFB2
5.89284e-73	0.274191	0.492	0.311	2.07546e-68	2	MRPL20
1.93655e-72	0.313061	0.656	0.465	6.82052e-68	2	FBXO33
2.29608e-72	0.400866	0.651	0.539	8.08681e-68	2	LOC696956
3.23525e-72	0.371348	0.409	0.26	1.13945e-67	2	ICOS
9.62884e-72	0.262034	0.505	0.331	3.39128e-67	2	ATP5MC1
1.42902e-71	0.375019	0.872	0.863	5.033e-67	2	OAZ1
2.39137e-71	0.363497	0.746	0.572	8.42242e-67	2	SPAG9
6.82927e-71	0.321312	0.651	0.504	2.40527e-66	2	UQCRQ
6.89472e-70	0.381634	0.844	0.707	2.42832e-65	2	FAF1
3.11666e-69	0.422727	0.533	0.364	1.09769e-64	2	PGK1
3.32641e-69	0.445363	0.754	0.642	1.17156e-64	2	HOPX
1.09155e-68	0.259772	0.752	0.572	3.84446e-64	2	ARF6
3.65164e-68	0.445427	0.826	0.656	1.28611e-63	2	GNLY
1.13207e-67	0.383264	0.983	0.983	3.98716e-63	2	KEG06-p07
1.69967e-67	0.497555	0.995	0.999	5.98624e-63	2	LOC109910387
2.58907e-67	0.251943	0.535	0.358	9.11869e-63	2	ATP6V1F
3.53599e-67	0.281164	0.598	0.413	1.24537e-62	2	AP2M1
3.44529e-66	0.310812	0.614	0.467	1.21343e-61	2	TMEM258
3.1568e-65	0.314667	0.787	0.673	1.11182e-60	2	CAP1
1.45417e-64	0.301395	0.585	0.431	5.12158e-60	2	ARF5
2.42204e-64	0.284258	0.482	0.321	8.53042e-60	2	LOC720132
3.4202e-64	0.267437	0.532	0.369	1.2046e-59	2	LOC717879
4.05327e-64	0.267293	0.754	0.565	1.42756e-59	2	SRSF4
7.52324e-64	0.329562	0.662	0.526	2.64968e-59	2	ATP5PF
1.75914e-63	0.437534	0.755	0.695	6.19571e-59	2	GSTP1
4.4142e-63	0.411172	0.817	0.8	1.55468e-58	2	RAC2
5.6296e-63	0.38427	0.656	0.51	1.98274e-58	2	LOC114677140
2.48314e-62	0.265292	0.648	0.487	8.74563e-58	2	SLIRP
7.68178e-62	0.399194	0.741	0.711	2.70552e-57	2	ATP5MG
1.44119e-60	0.301317	0.759	0.609	5.07586e-56	2	GNAI2
2.70468e-60	0.32277	0.705	0.605	9.52588e-56	2	COPS9
3.22509e-58	0.30576	0.794	0.7	1.13588e-53	2	TRIR
1.31743e-57	0.310532	0.63	0.463	4.64e-53	2	NDUFB10
1.40688e-57	0.275997	0.732	0.555	4.95504e-53	2	PRKDC
9.5333e-57	0.278481	0.663	0.519	3.35763e-52	2	TMA7
1.33863e-56	0.420284	0.95	0.927	4.71466e-52	2	KEG06-p13
3.49819e-56	0.324425	0.317	0.196	1.23206e-51	2	TIMP1
6.43703e-56	0.308339	0.635	0.498	2.26712e-51	2	NDUFB9
1.19323e-55	0.337904	0.701	0.551	4.20256e-51	2	ATP5F1A
5.17722e-55	0.360331	0.875	0.865	1.82342e-50	2	GMFG
1.72194e-52	0.257255	0.66	0.492	6.06468e-48	2	CACYBP
8.34411e-52	0.280701	0.611	0.468	2.9388e-47	2	SEC61G
2.39949e-51	0.255106	0.614	0.468	8.45101e-47	2	SAP18
1.01311e-48	0.550018	0.594	0.499	3.56818e-44	2	COTL1
9.48187e-47	0.281064	0.829	0.777	3.33951e-42	2	SUB1
1.0659e-46	0.257116	0.687	0.558	3.75409e-42	2	HNRNPA1
7.35374e-46	0.348869	0.842	0.833	2.58999e-41	2	ARPC1B
3.53007e-45	0.351953	0.938	0.924	1.24329e-40	2	RPSA
3.80482e-45	0.302839	0.926	0.935	1.34006e-40	2	CALM1
2.6248e-44	0.261102	0.665	0.551	9.24454e-40	2	NDUFA11
6.30733e-44	0.695341	0.268	0.179	2.22144e-39	2	KLRC3
6.44441e-44	0.559555	0.779	0.764	2.26972e-39	2	LOC114669738
9.58547e-44	0.250611	0.846	0.736	3.376e-39	2	TAF15
1.02366e-42	0.361102	0.838	0.824	3.60533e-38	2	S100A10
3.9719e-39	0.334476	0.801	0.805	1.3989e-34	2	ARPC3
1.12354e-36	0.641671	0.985	0.996	3.95711e-32	2	LOC114674534
7.85744e-36	0.360202	0.667	0.627	2.76739e-31	2	NDUFA4
7.31355e-35	0.270317	0.709	0.682	2.57583e-30	2	UBL5
5.06334e-34	0.269828	0.772	0.751	1.78331e-29	2	SRP14
2.41499e-30	0.262521	0.602	0.491	8.50561e-26	2	LGALS3
5.8415e-28	0.367518	0.88	0.895	2.05738e-23	2	RPS2
1.74113e-25	0.265531	0.328	0.246	6.13224e-21	2	PRSS57
1.49233e-24	0.259025	0.664	0.594	5.25598e-20	2	SEC61B
2.9062e-19	0.279438	0.933	0.939	1.02356e-14	2	KEG06-p12
3.41241e-18	0.253788	0.586	0.503	1.20185e-13	2	DYNLL1
4.86368e-17	0.338033	0.997	0.997	1.71299e-12	2	KEG06-r01
4.83804e-09	0.292567	0.369	0.466	0.000170396	2	LOC100426197

## Sheet: Cluster 3
p_val	avg_log2FC	pct.1	pct.2	p_val_adj	cluster	gene
0	1.91279	0.547	0.138	0	3	KLRC3
0	1.91263	0.987	0.634	0	3	GNLY
0	1.89794	0.88	0.306	0	3	MYO1E
0	1.87359	0.792	0.118	0	3	FCGR3
0	1.67431	0.974	0.634	0	3	CCL5
0	1.5944	0.788	0.495	0	3	LOC100430627
0	1.57769	0.833	0.262	0	3	TXK
0	1.49626	0.894	0.519	0	3	UBASH3B
0	1.47723	0.758	0.183	0	3	PRSS57
0	1.4419	0.54	0.16	0	3	PDGFD
0	1.35315	0.979	0.591	0	3	GZMH
0	1.22135	0.503	0.108	0	3	CLNK
0	1.20547	0.693	0.354	0	3	IKZF2
0	1.19846	0.997	0.677	0	3	GZMB
0	1.15386	0.399	0.098	0	3	KLRC2
0	1.13038	0.929	0.494	0	3	KLRD1
0	1.11638	0.606	0.252	0	3	PLCB1
0	1.09253	0.961	0.762	0	3	BABAM2
0	1.0822	0.344	0.077	0	3	COL11A1
0	1.07894	0.551	0.113	0	3	AFAP1L2
0	1.05632	0.983	0.676	0	3	ZEB2
0	1.02923	0.994	0.83	0	3	NKG7
0	1.0234	0.917	0.619	0	3	HOPX
0	1.01738	0.474	0.153	0	3	FGFBP2
0	1.00628	0.601	0.228	0	3	ROR2
0	1.00567	0.757	0.487	0	3	ARID5B
0	0.938345	0.659	0.305	0	3	FAM49A
0	0.937935	0.743	0.375	0	3	APBB2
0	0.902771	0.883	0.558	0	3	PRF1
0	0.902538	0.958	0.642	0	3	RGS9
0	0.898467	0.523	0.128	0	3	LAT2
0	0.878065	0.679	0.259	0	3	GPR141
0	0.870052	0.731	0.415	0	3	RIN3
0	0.8642	0.541	0.188	0	3	C1H1orf21
0	0.861733	0.644	0.272	0	3	RHOC
0	0.786973	0.992	0.946	0	3	PITPNC1
0	0.763901	0.522	0.225	0	3	CMAH
0	0.75465	0.786	0.482	0	3	HEG1
0	0.751952	0.824	0.531	0	3	SERPINB9
0	0.711603	0.714	0.309	0	3	GZMA
0	0.704868	0.484	0.193	0	3	LOC106999823
0	0.695971	0.958	0.738	0	3	ANXA1
0	0.681088	0.856	0.497	0	3	RAP1GAP2
0	0.679635	0.977	0.788	0	3	CST7
0	0.669917	0.31	0.068	0	3	SPRY2
0	0.64891	0.779	0.373	0	3	CX3CR1
0	0.648533	0.505	0.198	0	3	RHOBTB3
0	0.648174	0.886	0.646	0	3	ITGB2
0	0.647766	0.877	0.53	0	3	KLF2
0	0.647512	0.984	0.802	0	3	S100A10
0	0.64377	0.467	0.176	0	3	ADGRG1
0	0.631513	0.363	0.097	0	3	ITGAX
0	0.606701	0.317	0.084	0	3	RAB27B
3.57883e-305	0.629616	0.455	0.184	1.26046e-300	3	NCR3
1.58807e-304	0.728775	0.535	0.235	5.59318e-300	3	IL7
9.57982e-300	0.749856	0.913	0.684	3.37401e-295	3	LOC705095
2.68011e-298	0.774067	0.878	0.654	9.43936e-294	3	SNTB1
2.19449e-291	0.634734	0.889	0.633	7.72901e-287	3	FLNA
1.94411e-285	0.947705	0.291	0.083	6.84715e-281	3	CHSY3
5.28348e-281	1.00438	0.618	0.332	1.86084e-276	3	KLRB1
1.88199e-280	0.48817	0.999	0.983	6.62835e-276	3	B2M
3.5072e-279	0.687412	0.55	0.264	1.23524e-274	3	SETBP1
3.35814e-269	0.632707	0.661	0.368	1.18274e-264	3	GOLIM4
8.09057e-269	0.510077	0.99	0.913	2.8495e-264	3	SRGN
2.19186e-267	0.567553	0.36	0.134	7.71971e-263	3	CMA1
8.3835e-267	0.682092	0.31	0.1	2.95267e-262	3	MAMLD1
2.69118e-259	0.589542	0.494	0.236	9.47834e-255	3	METRNL
1.79358e-246	0.416122	0.287	0.093	6.317e-242	3	GPR153
1.06012e-244	0.586642	0.91	0.679	3.73374e-240	3	LOC106993196
1.59734e-244	0.659362	0.39	0.155	5.62584e-240	3	TNFRSF18
4.20063e-243	0.7478	0.843	0.608	1.47946e-238	3	LOC701976
2.39478e-242	0.560376	0.61	0.324	8.4344e-238	3	KLRF1
6.48156e-242	0.586529	0.781	0.548	2.28281e-237	3	TESC
1.30136e-240	0.650541	0.838	0.614	4.58338e-236	3	SYTL2
3.68829e-231	0.638363	0.688	0.455	1.29902e-226	3	IDS
5.59219e-230	0.49867	0.95	0.815	1.96957e-225	3	MSN
2.86422e-225	0.483387	0.582	0.316	1.00878e-220	3	PLEK
6.84637e-224	0.567158	0.359	0.136	2.41129e-219	3	LOC711031
1.3377e-220	0.426222	0.988	0.921	4.71139e-216	3	RAP1B
4.66811e-220	0.526009	0.715	0.466	1.64411e-215	3	RUNX3
9.32306e-218	0.576845	0.982	0.916	3.28358e-213	3	PRKCH
6.47101e-209	0.59214	0.592	0.343	2.27909e-204	3	AGPAT4
1.00109e-207	0.694188	0.57	0.329	3.52585e-203	3	FAM102B
5.7679e-206	0.590983	0.69	0.442	2.03145e-201	3	PIK3AP1
1.93317e-204	0.492847	0.691	0.443	6.80861e-200	3	ISCA1
2.87907e-200	1.13887	0.665	0.429	1.01401e-195	3	LOC100426632
4.55166e-200	0.527717	0.634	0.393	1.60309e-195	3	CIB1
8.04837e-200	0.396835	0.777	0.475	2.83464e-195	3	C11H12orf75
3.36277e-193	0.573166	0.942	0.789	1.18437e-188	3	ID2
1.9553e-192	0.36992	0.255	0.088	6.88658e-188	3	SEMA3G
1.21774e-190	0.50014	0.966	0.801	4.28886e-186	3	HCST
1.65916e-190	0.579964	0.799	0.605	5.84356e-186	3	LOC106992273
1.25308e-189	0.541325	0.413	0.19	4.41334e-185	3	NHSL2
5.72664e-187	0.487576	0.452	0.228	2.01692e-182	3	RNF144A
1.56172e-185	0.508235	0.907	0.742	5.50038e-181	3	SLCO3A1
2.71601e-184	0.521193	0.537	0.313	9.56579e-180	3	GLRX
5.43436e-183	0.474327	0.716	0.489	1.91398e-178	3	ARPC5L
1.28775e-181	0.511704	0.733	0.501	4.53545e-177	3	GRK5
1.51254e-181	0.420345	0.362	0.161	5.32716e-177	3	ITGAM
2.78956e-180	0.45185	0.954	0.816	9.82483e-176	3	ARPC1B
1.04718e-176	0.489498	0.639	0.404	3.68818e-172	3	C15H9orf16
1.81351e-175	0.630968	0.47	0.255	6.3872e-171	3	HIVEP3
2.95825e-174	0.443554	0.745	0.494	1.0419e-169	3	CEMIP2
1.63458e-173	0.555732	0.715	0.521	5.75698e-169	3	CCND2
3.0058e-172	0.47128	0.451	0.233	1.05864e-167	3	SLCO4C1
2.44093e-171	0.47528	0.425	0.215	8.59695e-167	3	TSPAN2
4.07877e-171	0.544131	0.993	0.884	1.43654e-166	3	S100A4
2.1857e-167	0.456952	0.946	0.821	7.69802e-163	3	SYTL3
4.00425e-166	0.507196	0.786	0.592	1.4103e-161	3	ABLIM1
2.40156e-163	0.419049	0.994	0.908	8.4583e-159	3	CD52
4.32262e-161	0.389797	0.967	0.842	1.52243e-156	3	UBB
1.06916e-159	0.459268	0.926	0.767	3.76557e-155	3	MYL6
1.45616e-158	0.441106	0.857	0.69	5.12858e-154	3	FXYD5
1.11545e-157	0.438674	0.749	0.555	3.92861e-153	3	SRI
1.28884e-156	0.50444	0.32	0.151	4.53929e-152	3	FAM3C
1.60513e-155	0.518363	0.315	0.141	5.65327e-151	3	CDKL5
3.67575e-155	0.487347	0.503	0.304	1.2946e-150	3	PTPN6
7.51064e-155	0.532387	0.462	0.256	2.64525e-150	3	THY1
3.13568e-154	0.54815	0.834	0.683	1.10439e-149	3	CDK17
3.20671e-152	0.463449	0.585	0.383	1.1294e-147	3	EFHD2
5.28822e-150	0.384154	0.674	0.428	1.86251e-145	3	PDE4D
2.24419e-149	0.456738	0.497	0.301	7.90405e-145	3	GTF3C1
7.98061e-149	0.360934	0.988	0.925	2.81077e-144	3	CALM1
1.12554e-147	0.521664	0.768	0.58	3.96416e-143	3	CD63
1.67832e-147	0.404987	0.682	0.454	5.91104e-143	3	KLF3
2.8691e-147	0.467282	0.835	0.663	1.0105e-142	3	TNFRSF1B
4.21648e-147	0.456721	0.627	0.435	1.48504e-142	3	SFT2D1
5.52572e-146	0.501543	0.824	0.616	1.94616e-141	3	VAV3
6.39622e-146	0.442363	0.967	0.909	2.25275e-141	3	KLF12
4.06285e-145	0.400625	0.786	0.606	1.43094e-140	3	MOB2
1.05386e-144	0.43831	0.667	0.458	3.71168e-140	3	SSBP4
1.20974e-144	0.522865	0.877	0.757	4.26069e-140	3	PTPN22
9.23401e-144	0.415156	0.898	0.789	3.25222e-139	3	CD3G
5.5102e-143	0.41644	0.801	0.594	1.94069e-138	3	ANXA2
6.91893e-142	0.395759	0.841	0.666	2.43685e-137	3	CAP1
2.19073e-140	0.432851	0.701	0.491	7.71576e-136	3	ATXN7L1
4.96416e-140	0.447059	0.967	0.85	1.74838e-135	3	CRIP1
2.06746e-137	0.414288	0.99	0.894	7.28161e-133	3	SH3BGRL3
2.57261e-137	0.527893	0.966	0.886	9.06073e-133	3	CBLB
2.86787e-137	0.408809	0.505	0.297	1.01006e-132	3	PRR5L
1.43311e-135	0.528645	0.862	0.701	5.04743e-131	3	S100A6
3.98246e-135	0.406692	0.475	0.285	1.40262e-130	3	POM121C
1.57622e-134	1.3522	0.424	0.271	5.55145e-130	3	TYROBP
2.18512e-132	0.954897	0.306	0.152	7.69598e-128	3	FCER1G
3.63927e-131	0.385559	0.99	0.893	1.28175e-126	3	MAMU-AG
3.72766e-130	0.455232	0.622	0.434	1.31288e-125	3	SLC25A4
3.89881e-130	0.777986	0.578	0.376	1.37316e-125	3	CCL4L1
2.83191e-129	0.523825	0.49	0.304	9.97397e-125	3	TIGIT
1.98416e-128	0.368236	0.549	0.348	6.98822e-124	3	TBX21
5.40339e-128	0.372206	0.734	0.551	1.90307e-123	3	MTPN
5.69752e-128	0.34247	0.351	0.181	2.00667e-123	3	TM6SF1
3.16911e-127	0.390414	0.499	0.305	1.11616e-122	3	USP28
3.71311e-124	0.394943	0.695	0.502	1.30776e-119	3	DHRS7
6.00709e-123	0.398072	0.804	0.622	2.1157e-118	3	TAGLN2
9.05713e-123	0.340331	0.759	0.545	3.18992e-118	3	UCP2
1.02912e-120	0.713818	0.348	0.193	3.62456e-116	3	TIMP1
1.66514e-120	0.464652	0.901	0.83	5.86461e-116	3	CD3D
6.22452e-120	0.409134	0.644	0.466	2.19227e-115	3	TPST2
1.18547e-119	0.341246	0.782	0.566	4.17522e-115	3	CD8A
1.77944e-119	0.478063	0.83	0.654	6.26718e-115	3	S100A11
3.8042e-119	0.419425	0.912	0.794	1.33984e-114	3	FBXW7
8.25777e-119	0.38859	0.325	0.166	2.90838e-114	3	GK5
2.50354e-117	0.395205	0.538	0.36	8.81748e-113	3	PDAP1
4.87509e-117	0.435781	0.87	0.742	1.71701e-112	3	PIK3R5
9.8299e-117	0.368214	0.923	0.769	3.46209e-112	3	EMP3
2.46401e-114	0.32905	0.925	0.802	8.67826e-110	3	AHNAK
2.97365e-114	0.366824	0.789	0.621	1.04732e-109	3	BZW1
2.29164e-113	0.29935	0.735	0.5	8.07117e-109	3	LOC114677140
6.01193e-113	0.361674	0.767	0.594	2.1174e-108	3	OSTF1
2.40632e-112	0.271255	0.981	0.873	8.47505e-108	3	PTMA
2.59515e-110	0.467522	0.44	0.277	9.14013e-106	3	UBE2F
2.84613e-108	0.352711	0.704	0.518	1.00241e-103	3	LDHA
6.08522e-108	0.542325	0.351	0.191	2.14321e-103	3	LOC100426537
9.48124e-108	0.483326	0.426	0.255	3.33929e-103	3	CD38
5.94132e-107	0.441289	0.454	0.292	2.09253e-102	3	LFNG
7.77738e-107	0.332606	0.888	0.722	2.73919e-102	3	MYL12B
2.98427e-106	0.361341	0.445	0.275	1.05106e-101	3	UBE2Q2
1.15046e-104	0.386124	0.731	0.564	4.05193e-100	3	C11H12orf57
1.66641e-104	0.352191	0.523	0.352	5.8691e-100	3	PXN
1.76026e-104	0.354646	0.841	0.685	6.19964e-100	3	LYST
2.77264e-104	0.356574	0.66	0.494	9.76524e-100	3	MADD
7.47121e-102	0.269901	0.996	0.924	2.63136e-97	3	LOC705671
8.49545e-101	0.340509	0.293	0.151	2.9921e-96	3	SLC11A1
4.53233e-100	0.339501	0.556	0.393	1.59629e-95	3	CTSA
6.15251e-100	0.356172	0.408	0.251	2.16691e-95	3	SPN
6.01097e-99	0.345998	0.415	0.253	2.11706e-94	3	MAMU-DQB1
1.51493e-97	0.307063	0.767	0.581	5.33558e-93	3	GNG5
2.32289e-97	0.365926	0.87	0.723	8.18121e-93	3	TXNIP
4.47819e-97	0.346355	0.562	0.393	1.57722e-92	3	PLEKHA1
7.0797e-97	0.290338	0.914	0.802	2.49347e-92	3	ACTR3
1.33532e-96	0.336835	0.761	0.607	4.703e-92	3	CYTIP
1.71687e-96	0.298777	0.669	0.494	6.04683e-92	3	MYO1G
4.86378e-95	0.340033	0.655	0.484	1.71302e-90	3	LGALS3
5.80406e-95	0.290548	0.672	0.47	2.04419e-90	3	LOC114675357
9.8341e-95	0.424572	0.483	0.324	3.46357e-90	3	ME2
2.43249e-94	0.487145	0.898	0.747	8.56724e-90	3	LOC114669738
2.68184e-94	0.345691	0.546	0.373	9.44544e-90	3	NUCB2
1.37612e-93	0.305027	0.96	0.85	4.84669e-89	3	OAZ1
2.26853e-92	0.303913	0.978	0.931	7.98975e-88	3	RIPOR2
4.17302e-92	0.327809	0.905	0.826	1.46974e-87	3	PPP2R5C
7.25101e-92	0.345505	0.811	0.661	2.5538e-87	3	LOC719702
1.68604e-91	0.660533	0.622	0.482	5.93824e-87	3	MAMU-A
3.8635e-91	0.403168	0.295	0.157	1.36073e-86	3	MAMU-DQA1
3.92111e-91	0.316342	0.403	0.248	1.38102e-86	3	MATK
1.05053e-90	0.384954	0.41	0.257	3.69996e-86	3	BCL2A1
1.74208e-90	0.303182	0.897	0.763	6.1356e-86	3	LOC114669767
2.18714e-90	0.343254	0.349	0.208	7.70311e-86	3	ACOT7
2.36073e-90	0.32467	0.564	0.399	8.31449e-86	3	PRDM1
8.3838e-90	0.303118	0.736	0.581	2.95277e-85	3	TMEM50A
1.64556e-89	0.379974	0.905	0.82	5.79566e-85	3	CD247
1.64981e-89	0.303197	0.881	0.734	5.81062e-85	3	SRP14
3.69822e-89	0.362406	0.705	0.559	1.30251e-84	3	TMEM181
5.60889e-89	0.307348	0.864	0.749	1.97545e-84	3	RNF149
8.92423e-88	0.293021	0.584	0.42	3.14311e-83	3	REXO2
1.85274e-87	0.398372	0.298	0.161	6.52536e-83	3	FAR2
8.68967e-87	0.303259	0.993	0.904	3.0605e-82	3	RPL21
1.75584e-86	0.320852	0.546	0.391	6.18406e-82	3	ABHD17A
3.31162e-86	0.333819	0.736	0.589	1.16635e-81	3	IL2RG
3.57151e-86	0.258681	0.945	0.846	1.25789e-81	3	SEPTIN7
4.25913e-86	0.360501	0.7	0.551	1.50006e-81	3	BST2
6.74803e-86	0.319853	0.835	0.716	2.37666e-81	3	PTPRA
2.34853e-85	0.473707	0.311	0.176	8.27151e-81	3	ARHGAP32
7.25673e-85	0.302314	0.618	0.459	2.55582e-80	3	EFCC1
1.16309e-84	0.32738	0.807	0.677	4.09642e-80	3	RAB27A
2.07856e-84	0.309967	0.534	0.38	7.3207e-80	3	DERL1
4.5876e-83	0.281793	0.82	0.652	1.61575e-78	3	TSC22D3
5.35724e-83	0.298967	0.817	0.694	1.88682e-78	3	TLN1
6.30123e-83	0.395635	0.291	0.165	2.21929e-78	3	STX2
5.83945e-82	0.340807	0.781	0.644	2.05666e-77	3	CALR
8.04816e-82	0.316884	0.57	0.415	2.83456e-77	3	DRAP1
1.51704e-81	0.25811	0.922	0.785	5.34301e-77	3	SELENOW
1.5323e-81	0.318272	0.42	0.274	5.39676e-77	3	TSPAN32
2.01628e-81	0.305757	0.35	0.213	7.10134e-77	3	STX11
1.10753e-80	0.311349	0.839	0.72	3.90072e-76	3	CAST
1.16235e-80	0.344988	0.703	0.55	4.09381e-76	3	RRAS2
1.32897e-80	0.295403	0.461	0.314	4.68062e-76	3	SLC44A2
1.35834e-80	0.299799	0.53	0.376	4.78408e-76	3	PTTG1IP
1.39172e-80	0.275901	0.794	0.639	4.90163e-76	3	GLIPR2
1.96579e-80	0.288961	0.522	0.367	6.92353e-76	3	SERPINB1
1.33713e-79	0.301438	0.698	0.547	4.70937e-75	3	FAR1
1.65394e-79	0.258734	0.443	0.289	5.82516e-75	3	RASGRP2
2.85666e-79	0.379483	0.614	0.47	1.00611e-74	3	CD226
3.94744e-79	0.365144	0.599	0.438	1.39029e-74	3	TFDP2
9.09431e-79	0.29012	0.433	0.286	3.20301e-74	3	RGS3
9.17132e-79	0.301349	0.678	0.53	3.23014e-74	3	SELENOT
1.33139e-78	0.385325	0.509	0.352	4.68916e-74	3	HLCS
1.95515e-77	0.260403	0.748	0.579	6.88605e-73	3	DBI
1.58744e-76	0.293452	0.903	0.792	5.59096e-72	3	MAPRE2
2.73988e-76	0.311195	0.365	0.23	9.64987e-72	3	ICAM2
8.20768e-76	0.302836	0.371	0.236	2.89074e-71	3	CASP10
1.4963e-75	0.267915	0.828	0.664	5.26996e-71	3	UBL5
1.54805e-75	0.611284	0.332	0.209	5.45223e-71	3	CD7
6.77279e-75	0.265886	0.699	0.557	2.38538e-70	3	CCDC69
1.70564e-73	0.338648	0.824	0.682	6.00728e-69	3	IFI27L2
2.93226e-73	0.503318	0.6	0.477	1.03274e-68	3	ITPKB
4.98964e-73	0.29357	0.878	0.768	1.75735e-68	3	ARAP2
7.73278e-73	0.297459	0.465	0.318	2.72348e-68	3	LOC114677679
3.20706e-72	0.310544	0.51	0.363	1.12953e-67	3	GPR174
5.11175e-72	0.356211	0.624	0.487	1.80036e-67	3	FAM126A
7.48956e-72	0.299908	0.794	0.674	2.63782e-67	3	LNPEP
8.17146e-72	0.316333	0.971	0.86	2.87799e-67	3	RPL17
1.00435e-71	0.293254	0.637	0.468	3.53733e-67	3	DOCK5
1.67448e-71	0.289018	0.872	0.785	5.89753e-67	3	SYNE1
5.66529e-71	0.331519	0.419	0.289	1.99531e-66	3	CARD16
6.64586e-71	0.318055	0.74	0.591	2.34067e-66	3	RAPGEF2
1.69812e-70	0.320423	0.933	0.816	5.98077e-66	3	SERF2
3.15882e-70	0.331814	0.571	0.428	1.11254e-65	3	LOC719250
1.05735e-69	0.251908	0.467	0.326	3.72398e-65	3	GUK1
1.35247e-69	0.255754	0.36	0.232	4.76341e-65	3	UCHL5
3.02124e-69	0.293344	0.578	0.44	1.06408e-64	3	PRKAR1A
3.99953e-69	0.293934	0.484	0.344	1.40863e-64	3	LMO4
1.1341e-67	0.277663	0.464	0.324	3.99431e-63	3	SH3BP5
1.45478e-67	0.254274	0.847	0.732	5.12373e-63	3	ATP2B4
2.21446e-67	0.263567	0.951	0.883	7.79933e-63	3	JAK1
3.30847e-67	0.284532	0.709	0.581	1.16524e-62	3	PDIA3
3.39329e-67	0.288316	0.711	0.573	1.19512e-62	3	LOC707227
2.79135e-66	0.321449	0.35	0.225	9.83113e-62	3	LOC107000335
4.52046e-66	0.282706	0.697	0.568	1.59211e-61	3	C6H5orf56
1.95594e-65	0.330977	0.458	0.326	6.88883e-61	3	DGKD
2.8153e-65	0.356636	0.631	0.486	9.91549e-61	3	TMTC2
4.3636e-65	0.339597	0.372	0.247	1.53686e-60	3	INPP5F
1.10403e-64	0.258849	0.473	0.338	3.88839e-60	3	APMAP
1.28506e-64	0.272343	0.845	0.749	4.52598e-60	3	RAPGEF1
1.82647e-64	0.258917	0.694	0.552	6.43283e-60	3	GABARAPL2
9.49104e-64	0.252199	0.82	0.684	3.34275e-59	3	LY6E-1
1.60456e-63	0.267064	0.389	0.261	5.65126e-59	3	ENPP4
1.7981e-63	0.556028	0.427	0.305	6.33291e-59	3	LOC714964
2.13312e-63	0.255816	0.679	0.537	7.51283e-59	3	SEPTIN11
2.19296e-63	0.254752	0.818	0.701	7.7236e-59	3	MAMU-A3
5.60211e-63	0.255087	0.563	0.419	1.97306e-58	3	LRMP
3.16364e-62	0.259549	0.754	0.628	1.11423e-57	3	SNRK
1.00552e-61	0.403189	0.576	0.434	3.54143e-57	3	LOC100426197
1.0699e-61	0.270467	0.466	0.334	3.7682e-57	3	LOC114679577
1.7568e-61	0.298834	0.361	0.237	6.18745e-57	3	VCL
4.15161e-61	0.274055	0.547	0.41	1.4622e-56	3	LOC106997893
4.8408e-61	0.272483	0.561	0.428	1.70493e-56	3	APOBEC3G
2.43194e-60	0.251664	0.474	0.349	8.56528e-56	3	CDC42SE1
3.4933e-60	0.294502	0.621	0.495	1.23034e-55	3	DNAJB14
1.15349e-57	0.250491	0.613	0.477	4.06258e-53	3	KIF13B
3.58233e-57	0.256922	0.405	0.285	1.2617e-52	3	SERTAD1
2.8176e-56	0.252787	0.525	0.398	9.9236e-52	3	CISD3
8.20573e-56	0.27329	0.968	0.916	2.89006e-51	3	RABGAP1L
1.56085e-55	0.274813	0.783	0.658	5.4973e-51	3	ATP5MPL
4.32875e-55	0.280587	0.525	0.397	1.52459e-50	3	PARK7
4.45931e-55	0.277426	0.475	0.339	1.57057e-50	3	CAPG
1.22264e-54	0.277721	0.287	0.179	4.30615e-50	3	LOC114669810
1.53652e-54	0.264261	0.401	0.283	5.41163e-50	3	RNF11
4.62264e-53	0.250303	0.389	0.272	1.62809e-48	3	PDE4A
2.34188e-51	0.254541	0.482	0.357	8.24809e-47	3	ABCC1
2.34569e-51	0.274814	0.556	0.427	8.26153e-47	3	MCTP2
3.08542e-51	0.269847	0.427	0.302	1.08668e-46	3	MAMU-DRB1
8.36368e-51	0.258379	0.553	0.43	2.94569e-46	3	IFI6
2.2134e-50	0.26914	0.665	0.548	7.79561e-46	3	RB1
2.24858e-50	0.334547	0.311	0.207	7.91951e-46	3	IL21R
1.25479e-49	0.273097	0.511	0.391	4.41939e-45	3	KIF1B
7.1388e-49	0.275206	0.892	0.777	2.51428e-44	3	RPL35
9.26986e-49	0.270737	0.91	0.836	3.26484e-44	3	SCML4
3.15833e-47	0.265648	0.615	0.508	1.11236e-42	3	PYHIN1
5.0867e-42	0.251372	0.679	0.572	1.79154e-37	3	ZHX2
8.06148e-42	0.292224	0.274	0.185	2.83925e-37	3	RELB
9.39587e-42	0.290438	0.589	0.486	3.30922e-37	3	NR4A2
1.39673e-41	0.412279	0.596	0.518	4.91928e-37	3	SMAD3
2.18331e-39	0.267498	0.395	0.295	7.68963e-35	3	LOC106995452
5.04668e-36	0.295766	0.729	0.701	1.77744e-31	3	KEG06-p04
1.79154e-33	0.765729	0.333	0.267	6.3098e-29	3	CMC1
2.6051e-33	0.254643	0.464	0.37	9.17517e-29	3	MCOLN2
2.70811e-31	0.380252	0.594	0.51	9.53796e-27	3	LOC114677644
1.87625e-29	0.25658	0.481	0.394	6.60815e-25	3	OSBPL3
5.94977e-23	0.32316	0.294	0.226	2.09551e-18	3	LARGE1
2.83517e-22	0.266119	0.381	0.305	9.98549e-18	3	IL12RB2
9.2555e-22	0.258945	0.555	0.482	3.25979e-17	3	JARID2
3.96277e-20	0.266888	0.737	0.672	1.39569e-15	3	DLG1
4.75906e-17	0.264054	0.613	0.548	1.67614e-12	3	MAML2
1.56471e-13	0.273769	0.331	0.278	5.51092e-09	3	WDR63

## Sheet: Cluster 4
p_val	avg_log2FC	pct.1	pct.2	p_val_adj	cluster	gene
5.8816e-269	0.885741	0.998	0.997	2.0715e-264	4	KEG06-r01
8.69295e-183	1.40037	0.622	0.424	3.06166e-178	4	LOC114673210
4.02333e-172	0.721244	0.901	0.859	1.41702e-167	4	ATXN1
1.15938e-168	0.762556	0.926	0.949	4.08335e-164	4	KEG06-p11
3.82287e-143	1.01218	0.59	0.408	1.34641e-138	4	LOC114673461
2.57951e-141	0.620176	0.915	0.903	9.08502e-137	4	TNIK
1.87223e-133	0.642911	0.92	0.931	6.594e-129	4	KEG06-p13
1.53175e-131	0.620425	0.903	0.897	5.39484e-127	4	ANKRD11
1.39063e-128	0.655134	0.848	0.811	4.89779e-124	4	BCL11B
2.44905e-120	0.446487	0.977	0.974	8.62555e-116	4	MBNL1
5.49747e-115	0.853993	0.596	0.419	1.93621e-110	4	ADORA2B
5.47485e-113	0.955341	0.611	0.495	1.92824e-108	4	BMT2
1.79556e-110	0.695958	0.766	0.698	6.32395e-106	4	LYST
3.69493e-104	0.744092	0.687	0.586	1.30135e-99	4	CDC14A
5.59935e-101	0.646357	0.854	0.817	1.97209e-96	4	PTPRJ
2.37507e-100	0.787857	0.735	0.632	8.36498e-96	4	TGFBR3
1.87749e-99	1.22135	0.409	0.251	6.61252e-95	4	PDZRN3
1.2914e-94	0.725743	0.752	0.7	4.54831e-90	4	XYLT1
2.68829e-91	0.637354	0.849	0.82	9.46815e-87	4	PRKCA
2.11556e-89	0.539973	0.319	0.17	7.451e-85	4	LOC114678430
4.7857e-87	0.426846	0.959	0.956	1.68552e-82	4	ARHGAP15
2.81123e-86	0.624835	0.833	0.815	9.90116e-82	4	FOXP1
1.28332e-85	0.828965	0.564	0.399	4.51986e-81	4	BTBD11
2.08073e-84	0.658235	0.414	0.265	7.32832e-80	4	ICOS
7.23769e-82	0.535391	0.973	0.984	2.54912e-77	4	KEG06-p07
1.88301e-79	0.425724	0.962	0.961	6.63198e-75	4	ANKRD44
2.80306e-78	0.486742	0.925	0.94	9.87238e-74	4	KEG06-p12
3.19154e-76	0.662275	0.372	0.233	1.12406e-71	4	LOC114679371
1.1909e-72	0.515542	0.837	0.832	4.19433e-68	4	ZC3HAV1
2.59923e-72	0.535509	0.748	0.62	9.15449e-68	4	PAG1
1.90166e-70	0.602432	0.757	0.696	6.69766e-66	4	TC2N
6.50872e-69	0.398563	0.945	0.951	2.29237e-64	4	FNBP1
6.70498e-69	0.658045	0.702	0.621	2.36149e-64	4	TRPS1
8.22631e-68	1.1624	0.988	0.995	2.89731e-63	4	LOC114674534
4.23329e-67	0.627997	0.681	0.646	1.49097e-62	4	PCED1B
7.87153e-67	0.436003	0.89	0.898	2.77235e-62	4	CBLB
2.83394e-66	0.408094	0.948	0.955	9.98112e-62	4	SKAP1
6.08567e-66	0.534439	0.773	0.707	2.14337e-61	4	ARHGAP26
6.83947e-66	0.59883	0.751	0.661	2.40886e-61	4	THEMIS
6.75574e-64	1.03801	0.354	0.235	2.37937e-59	4	PLAC8
3.22814e-63	0.517108	0.828	0.823	1.13695e-58	4	STK10
2.94035e-62	0.515174	0.87	0.864	1.03559e-57	4	CHST11
2.0508e-61	0.473501	0.827	0.815	7.22293e-57	4	ITGA4
1.30398e-60	0.48448	0.268	0.154	4.59262e-56	4	HAVCR2
1.32315e-59	0.639328	0.332	0.207	4.66013e-55	4	BACH2
4.85638e-59	0.619853	0.672	0.614	1.71042e-54	4	HIVEP2
8.45139e-59	0.512777	0.797	0.786	2.97658e-54	4	ITCH
2.12416e-58	0.491076	0.801	0.813	7.4813e-54	4	SMCHD1
9.33237e-56	0.407864	0.845	0.853	3.28686e-51	4	ITK
1.72535e-54	0.39181	0.89	0.886	6.07667e-50	4	VPS13B
4.16076e-53	0.357342	0.911	0.93	1.46542e-48	4	CELF2
1.08628e-52	0.459744	0.851	0.783	3.82587e-48	4	CAMK4
1.22086e-52	0.519288	0.789	0.768	4.29988e-48	4	ARL15
2.02298e-52	0.372215	0.923	0.925	7.12493e-48	4	PRKCH
1.02786e-51	0.643548	0.496	0.405	3.62011e-47	4	LRIG1
4.99804e-47	0.547923	0.701	0.673	1.76031e-42	4	GLCCI1
7.41032e-46	0.610944	0.389	0.292	2.60992e-41	4	PECAM1
2.87919e-45	0.652309	0.509	0.43	1.01405e-40	4	ARHGEF18
3.59982e-44	0.466318	0.757	0.775	1.26786e-39	4	ATRX
6.72171e-44	0.494308	0.338	0.234	2.36739e-39	4	RBPMS
9.61081e-44	0.505166	0.482	0.375	3.38493e-39	4	GPRIN3
1.74239e-43	0.414463	0.797	0.8	6.13669e-39	4	PRKCQ
3.76662e-42	0.35254	0.934	0.937	1.3266e-37	4	RIPOR2
2.00084e-41	0.546843	0.629	0.577	7.04694e-37	4	CARD11
2.52415e-40	0.386654	0.811	0.825	8.89007e-36	4	WNK1
6.87314e-40	0.428551	0.808	0.83	2.42072e-35	4	SEMA4D
1.44507e-39	0.338169	0.806	0.866	5.08955e-35	4	STK17A
3.35749e-39	0.339663	0.891	0.918	1.18251e-34	4	CDC42SE2
6.37854e-39	0.435496	0.811	0.825	2.24652e-34	4	KANSL1
1.77741e-38	0.344588	0.894	0.922	6.26005e-34	4	SH3KBP1
2.7999e-38	0.466803	0.768	0.76	9.86124e-34	4	RAPGEF1
3.87837e-38	0.508466	0.729	0.733	1.36596e-33	4	MYO1F
3.88452e-38	0.549813	0.451	0.349	1.36813e-33	4	GZMK
4.12741e-38	0.553472	0.655	0.625	1.45367e-33	4	FUT8
8.89222e-37	0.59976	0.318	0.225	3.13184e-32	4	LARGE1
1.38446e-36	0.299604	0.95	0.952	4.87608e-32	4	PITPNC1
1.88241e-35	0.40854	0.761	0.774	6.62985e-31	4	ZNF292
2.08388e-35	0.26269	0.937	0.958	7.33942e-31	4	LOC707383
4.90062e-35	0.461017	0.313	0.22	1.726e-30	4	LOC106998573
5.08529e-35	0.513824	0.619	0.594	1.79104e-30	4	TBC1D1
5.70595e-35	0.43069	0.781	0.797	2.00963e-30	4	AAK1
1.89e-34	0.478108	0.765	0.759	6.65659e-30	4	ZNF609
8.54134e-34	0.378424	0.834	0.836	3.00826e-29	4	LRBA
1.37918e-33	0.340177	0.923	0.933	4.85747e-29	4	EML4
2.24442e-33	0.346149	0.25	0.164	7.90484e-29	4	LOC114679643
4.96194e-33	0.348103	0.803	0.82	1.74759e-28	4	USP15
9.81819e-33	0.450806	0.759	0.782	3.45797e-28	4	NFATC3
6.44392e-32	0.741358	0.324	0.248	2.26955e-27	4	IFI27
6.54967e-32	0.484204	0.685	0.682	2.30679e-27	4	CYTH1
6.59119e-32	0.512261	0.391	0.316	2.32142e-27	4	SEPTIN9
8.3527e-31	0.340609	0.839	0.855	2.94182e-26	4	PRKCB
3.01908e-30	0.414267	0.724	0.723	1.06332e-25	4	UBE2H
3.41041e-30	0.398975	0.321	0.236	1.20115e-25	4	GPR183
3.9657e-30	0.3635	0.806	0.81	1.39672e-25	4	FBXW7
1.22493e-29	0.415114	0.769	0.757	4.31419e-25	4	PDE3B
1.55297e-29	0.416031	0.742	0.759	5.46957e-25	4	MPZL1
1.70962e-29	0.495082	0.556	0.532	6.02127e-25	4	SAMHD1
7.03751e-29	0.332976	0.852	0.869	2.47861e-24	4	PICALM
6.63737e-28	0.307312	0.906	0.935	2.33768e-23	4	IKZF1
8.0874e-28	0.37749	0.818	0.842	2.84838e-23	4	INPP4A
2.25976e-27	0.313634	0.832	0.845	7.95887e-23	4	FYN
1.78642e-26	0.414185	0.731	0.734	6.29176e-22	4	SETD2
2.02704e-26	0.356309	0.817	0.829	7.13923e-22	4	MED13L
2.35503e-26	0.471256	0.639	0.6	8.29441e-22	4	GRAP2
2.69e-26	0.426527	0.732	0.756	9.47417e-22	4	EPB41
3.8927e-26	0.301635	0.759	0.774	1.37101e-21	4	RORA
5.43725e-26	0.448433	0.284	0.214	1.915e-21	4	BCL2L11
1.10612e-25	0.456752	0.656	0.658	3.89576e-21	4	MARK3
1.29987e-25	0.399073	0.282	0.213	4.57814e-21	4	VPS37B
1.7334e-25	0.446366	0.411	0.339	6.10505e-21	4	NRIP1
1.97836e-25	0.783733	0.997	0.998	6.96777e-21	4	LOC109910387
9.15956e-25	0.379391	0.828	0.861	3.226e-20	4	PREX1
1.03114e-24	0.357953	0.771	0.784	3.63167e-20	4	ARAP2
1.42312e-24	0.363652	0.813	0.822	5.01222e-20	4	ARID1B
2.07859e-24	0.416319	0.705	0.723	7.3208e-20	4	CCM2
2.10203e-24	0.475812	0.719	0.725	7.40336e-20	4	MSI2
1.68117e-23	0.480052	0.526	0.488	5.92109e-19	4	JARID2
3.31573e-23	0.421519	0.649	0.636	1.1678e-18	4	PHF21A
3.58182e-23	0.484078	0.552	0.51	1.26152e-18	4	BICDL1
7.85934e-23	0.405258	0.727	0.743	2.76806e-18	4	UBAC2
1.62718e-22	0.456177	0.61	0.588	5.73093e-18	4	ABR
2.29601e-22	0.429666	0.668	0.687	8.08656e-18	4	RNF213
4.3617e-22	0.364095	0.721	0.739	1.53619e-17	4	GSK3B
7.10133e-22	0.434525	0.618	0.619	2.50109e-17	4	PSME4
2.99184e-21	0.494643	0.539	0.511	1.05373e-16	4	RFX7
3.23561e-21	0.418187	0.663	0.669	1.13958e-16	4	ATP10A
3.87687e-21	0.349238	0.76	0.787	1.36543e-16	4	ARID4B
4.19005e-21	0.478619	0.547	0.515	1.47574e-16	4	ATXN7L1
8.18825e-21	0.380334	0.751	0.783	2.8839e-16	4	CAB39
1.17333e-20	0.512733	0.579	0.54	4.13246e-16	4	RAP1GAP2
3.56412e-20	0.507801	0.488	0.459	1.25528e-15	4	SSBP3
9.33784e-20	0.270434	0.903	0.928	3.28879e-15	4	AKAP13
1.46315e-19	0.332126	0.263	0.201	5.15322e-15	4	ABHD6
1.50528e-19	0.354336	0.738	0.763	5.3016e-15	4	ATF7IP
1.68314e-19	0.297838	0.744	0.837	5.92802e-15	4	LCK
1.7768e-19	0.345579	0.798	0.819	6.25788e-15	4	ZFAND3
2.42802e-19	0.410591	0.404	0.351	8.55148e-15	4	E2F3
3.48538e-19	0.290586	0.807	0.801	1.22755e-14	4	ELMO1
3.92466e-19	0.275303	0.908	0.917	1.38226e-14	4	KLF12
5.88999e-19	0.302566	0.852	0.871	2.07445e-14	4	PARP8
7.35964e-19	0.320125	0.337	0.27	2.59207e-14	4	CD38
7.37321e-19	0.432898	0.639	0.644	2.59684e-14	4	NLRC5
8.75964e-19	0.385888	0.774	0.796	3.08515e-14	4	ASH1L
1.45705e-18	0.343528	0.765	0.779	5.13175e-14	4	DYRK1A
1.27887e-17	0.310288	0.848	0.871	4.50418e-13	4	IQGAP2
1.31215e-17	0.384391	0.821	0.846	4.62139e-13	4	RUNX1
1.45706e-17	0.340504	0.708	0.746	5.13175e-13	4	CLEC2D
1.9466e-17	0.350413	0.752	0.786	6.85591e-13	4	NCOA3
2.26867e-17	0.278713	0.848	0.866	7.99027e-13	4	UTRN
3.80169e-17	0.377486	0.707	0.707	1.33896e-12	4	DENND1B
4.73701e-17	0.466838	0.548	0.526	1.66838e-12	4	SMAD3
5.78213e-17	0.330735	0.701	0.74	2.03646e-12	4	ITGAL
6.16626e-17	0.455602	0.523	0.484	2.17176e-12	4	NEDD4L
6.79548e-17	0.320269	0.769	0.818	2.39337e-12	4	DDX17
1.09533e-16	0.395436	0.499	0.444	3.85774e-12	4	CD6
1.11691e-16	0.330991	0.538	0.507	3.93374e-12	4	CD8B
1.24627e-16	0.443426	0.506	0.492	4.38937e-12	4	GPR107
2.30866e-16	0.422291	0.562	0.57	8.1311e-12	4	FGD3
2.44233e-16	0.401559	0.71	0.733	8.6019e-12	4	ZCCHC7
5.92596e-16	0.398026	0.599	0.61	2.08712e-11	4	RAP1GDS1
7.13978e-16	0.309533	0.846	0.87	2.51463e-11	4	TNRC6B
1.24093e-15	0.303702	0.739	0.76	4.37054e-11	4	RASA2
3.80482e-15	0.329783	0.686	0.699	1.34006e-10	4	COP1
4.53848e-15	0.415637	0.597	0.605	1.59845e-10	4	NSF
5.85796e-15	0.255057	0.802	0.84	2.06318e-10	4	PPP2R5C
8.49001e-15	0.267326	0.814	0.826	2.99018e-10	4	DNAJC1
1.1508e-14	0.414075	0.576	0.584	4.05311e-10	4	OGT
1.23664e-14	0.300471	0.832	0.868	4.35545e-10	4	PIP4K2A
2.5306e-14	0.408062	0.577	0.592	8.91278e-10	4	TASOR
3.10595e-14	0.710899	0.399	0.358	1.09391e-09	4	GZMA
4.48424e-14	0.31778	0.518	0.511	1.57935e-09	4	COTL1
1.01433e-13	0.393133	0.546	0.551	3.57247e-09	4	N4BP1
2.14197e-13	0.371129	0.585	0.587	7.54402e-09	4	RHOH
2.35815e-13	0.304677	0.792	0.825	8.30539e-09	4	USP34
2.57783e-13	0.364162	0.565	0.56	9.07912e-09	4	HIVEP1
3.62956e-13	0.293494	0.732	0.769	1.27833e-08	4	WAC
3.83956e-13	0.413766	0.615	0.624	1.35229e-08	4	FOXO1
6.59897e-13	0.413939	0.587	0.586	2.32416e-08	4	ZHX2
7.67702e-13	0.385446	0.654	0.681	2.70385e-08	4	NSD1
1.04764e-12	0.394516	0.583	0.589	3.68979e-08	4	GLG1
1.477e-12	0.411753	0.577	0.577	5.202e-08	4	ZNF407
2.42029e-12	0.429597	0.492	0.482	8.52426e-08	4	TBL1X
2.67121e-12	0.329744	0.713	0.762	9.40801e-08	4	EVL
3.97814e-12	0.373192	0.692	0.725	1.4011e-07	4	PPP3CC
4.67853e-12	0.343201	0.651	0.65	1.64778e-07	4	MAP3K5
5.84553e-12	0.37533	0.564	0.57	2.0588e-07	4	LRCH3
6.02415e-12	0.332633	0.653	0.646	2.12171e-07	4	PDE7A
8.99898e-12	0.37166	0.566	0.562	3.16944e-07	4	ATP8A1
9.66937e-12	0.352166	0.725	0.746	3.40555e-07	4	VTI1A
1.70309e-11	0.31796	0.744	0.772	5.99829e-07	4	KAT6A
1.91156e-11	0.465533	0.84	0.895	6.73252e-07	4	KEG06-p08
2.15929e-11	0.350273	0.41	0.379	7.60501e-07	4	TET2
2.3312e-11	0.357636	0.575	0.584	8.21049e-07	4	SEPTIN6
2.45286e-11	0.298729	0.726	0.777	8.63898e-07	4	CNOT6L
2.54414e-11	0.347963	0.716	0.744	8.96047e-07	4	TBL1XR1
2.76195e-11	0.377427	0.476	0.471	9.7276e-07	4	ZMYND8
3.93282e-11	0.457524	0.362	0.338	1.38514e-06	4	NBEAL1
4.14736e-11	0.280725	0.79	0.834	1.4607e-06	4	MYCBP2
4.55664e-11	0.338625	0.669	0.691	1.60485e-06	4	UTY
4.60564e-11	0.282659	0.794	0.827	1.62211e-06	4	BIRC6
4.60815e-11	0.359822	0.282	0.248	1.62299e-06	4	ELL
4.62179e-11	0.278795	0.772	0.785	1.6278e-06	4	STK39
5.1204e-11	0.344606	0.695	0.736	1.80341e-06	4	PPP6R3
6.47248e-11	0.295417	0.782	0.819	2.27961e-06	4	NCOA2
6.70121e-11	0.356047	0.58	0.57	2.36017e-06	4	CHN2
7.65736e-11	0.311001	0.545	0.554	2.69692e-06	4	LOC707555
7.9028e-11	0.346056	0.459	0.423	2.78337e-06	4	ZEB1
9.17378e-11	0.383369	0.408	0.378	3.23101e-06	4	ANKRD28
9.6598e-11	0.426029	0.418	0.397	3.40218e-06	4	TULP4
1.48599e-10	0.341432	0.626	0.633	5.23365e-06	4	TMEM131L
1.55211e-10	0.315304	0.612	0.715	5.46652e-06	4	KEG06-p04
2.10479e-10	0.352582	0.757	0.787	7.41309e-06	4	SRPK2
2.28693e-10	0.370068	0.511	0.522	8.05456e-06	4	MARK2
2.42617e-10	0.32432	0.365	0.338	8.54499e-06	4	DDHD1
2.63052e-10	0.26607	0.721	0.749	9.26468e-06	4	ATP2B4
2.91392e-10	0.257426	0.84	0.87	1.02628e-05	4	DOCK2
3.1074e-10	0.385216	0.431	0.415	1.09442e-05	4	ARNTL
4.49969e-10	0.322074	0.713	0.741	1.58479e-05	4	CAMK2D
6.07505e-10	0.358186	0.601	0.627	2.13963e-05	4	OGA
1.03563e-09	0.338044	0.647	0.673	3.64748e-05	4	STIM1
1.86266e-09	0.316088	0.514	0.52	6.56028e-05	4	CASP8
1.87705e-09	0.361076	0.446	0.437	6.61097e-05	4	HDAC4
2.01755e-09	0.325756	0.303	0.276	7.1058e-05	4	PLCG1
2.16682e-09	0.319542	0.335	0.302	7.63153e-05	4	ABHD17B
2.84715e-09	0.333175	0.506	0.513	0.000100277	4	LOC106993126
2.91859e-09	0.378081	0.392	0.373	0.000102793	4	GALNT3
5.28989e-09	0.433693	0.428	0.4	0.00018631	4	EXT1
5.54009e-09	0.322493	0.6	0.634	0.000195122	4	BAZ1A
1.01697e-08	0.313643	0.66	0.685	0.000358179	4	EIF4G3
1.2008e-08	0.335728	0.575	0.593	0.000422921	4	CSNK1G1
1.28641e-08	0.339509	0.276	0.247	0.000453072	4	LOC107000617
1.73364e-08	0.323438	0.676	0.72	0.000610587	4	SETX
1.86186e-08	0.330653	0.672	0.703	0.000655746	4	KDM4C
2.11257e-08	0.30399	0.668	0.697	0.000744047	4	RAB27A
2.64275e-08	0.392269	0.586	0.614	0.000930776	4	GATAD2B
4.0473e-08	0.349774	0.683	0.723	0.00142546	4	GNB1
5.33671e-08	0.396179	0.466	0.471	0.00187959	4	GBF1
5.62883e-08	0.4376	0.384	0.372	0.00198247	4	FAM222B
6.92956e-08	0.361355	0.454	0.455	0.00244059	4	ATF2
8.65215e-08	0.313286	0.605	0.631	0.00304729	4	UBR5
8.72539e-08	0.331766	0.624	0.654	0.00307308	4	KDM6A
1.65112e-07	0.34653	0.686	0.722	0.00581525	4	PACS1
2.18521e-07	0.335856	0.49	0.489	0.0076963	4	FAM214A
2.32138e-07	0.26368	0.681	0.721	0.00817592	4	SLC38A1
2.70529e-07	0.252767	0.679	0.705	0.00952803	4	CDK17
3.50018e-07	0.336969	0.596	0.623	0.0123276	4	IKZF3
3.70173e-07	0.359725	0.502	0.515	0.0130375	4	CNST
4.05289e-07	0.294293	0.348	0.33	0.0142743	4	LOC100425941
4.46893e-07	0.278373	0.679	0.742	0.0157396	4	PNISR
4.74782e-07	0.298056	0.731	0.772	0.0167218	4	ARHGEF3
4.80078e-07	0.318232	0.45	0.429	0.0169083	4	LOC114671905
7.94475e-07	0.298537	0.346	0.323	0.0279814	4	HNRNPLL
8.19441e-07	0.318735	0.615	0.646	0.0288607	4	CEP85L
1.05356e-06	0.409753	0.307	0.277	0.0371064	4	FHIT
1.13865e-06	0.263439	0.718	0.773	0.0401032	4	BPTF
1.24024e-06	0.271507	0.668	0.711	0.0436812	4	RICTOR
1.35292e-06	0.372908	0.593	0.623	0.0476497	4	SMG6

## Sheet: Cluster 5
p_val	avg_log2FC	pct.1	pct.2	p_val_adj	cluster	gene
0	2.04585	0.657	0.054	0	5	ZBTB16
0	1.74598	0.951	0.384	0	5	IL7R
0	1.68573	0.611	0.265	0	5	LOC720538
0	1.67378	0.522	0.135	0	5	LOC711031
0	1.54699	0.681	0.174	0	5	DOCK3
0	1.51472	0.544	0.127	0	5	NCALD
0	1.46798	0.522	0.016	0	5	IL23R
0	1.46508	0.438	0.091	0	5	TMEM117
0	1.44741	0.74	0.252	0	5	MFHAS1
0	1.40273	0.795	0.499	0	5	TNFAIP3
0	1.38835	0.943	0.758	0	5	RORA
0	1.35922	0.335	0.05	0	5	AFF3
0	1.3495	0.665	0.244	0	5	NR3C2
0	1.32601	0.261	0.01	0	5	TMEM132C
0	1.31416	0.824	0.388	0	5	SATB1
0	1.30237	0.479	0.127	0	5	MED12L
0	1.26202	0.326	0.022	0	5	PTPN13
0	1.23783	0.516	0.029	0	5	CCR6
0	1.22467	0.473	0.085	0	5	PAK3
0	1.21661	0.65	0.198	0	5	ADAM12
0	1.18365	0.838	0.429	0	5	RUNX2
0	1.1781	0.585	0.193	0	5	KLRG1
0	1.17791	0.31	0.061	0	5	NCAM1
0	1.16641	0.744	0.296	0	5	DPP4
0	1.15811	0.902	0.425	0	5	LTB
0	1.1221	0.764	0.349	0	5	AKT3
0	1.08914	0.896	0.631	0	5	TTC39C
0	1.03363	0.942	0.607	0	5	PAG1
0	0.977486	0.525	0.126	0	5	ANKRD6
0	0.970683	0.424	0.071	0	5	IL18RAP
0	0.957981	0.577	0.22	0	5	PLXNC1
0	0.947506	0.412	0.037	0	5	LOC100427702
0	0.928087	0.687	0.256	0	5	CYB5A
0	0.894452	0.416	0.074	0	5	JAML
0	0.874342	0.528	0.149	0	5	SPOCK2
0	0.868802	0.289	0.035	0	5	P2RY14
0	0.852083	0.36	0.021	0	5	GLT1D1
0	0.841002	0.313	0.053	0	5	PELI2
0	0.803111	0.322	0.072	0	5	MAST4
0	0.764316	0.274	0.039	0	5	STAP1
0	0.763937	0.294	0.042	0	5	KIAA1217
0	0.685071	0.309	0.06	0	5	HHAT
0	0.545223	0.251	0.046	0	5	TNFSF13B
1.34589e-299	0.977981	0.513	0.175	4.74022e-295	5	ITGA1
2.27303e-288	1.16242	0.839	0.535	8.0056e-284	5	ERN1
6.7109e-288	1.11866	0.643	0.295	2.36358e-283	5	GRAMD1B
7.93844e-288	0.980508	0.552	0.219	2.79592e-283	5	GPR183
1.57908e-283	0.953654	0.82	0.483	5.56154e-279	5	SFMBT2
6.54321e-282	1.03419	0.878	0.625	2.30452e-277	5	DUSP1
1.73181e-272	0.985282	0.591	0.239	6.09944e-268	5	PDZRN3
1.4285e-270	0.915848	0.896	0.692	5.03119e-266	5	RBMS1
9.67166e-259	0.559542	0.351	0.099	3.40636e-254	5	KDM5B
1.69908e-257	1.10303	0.78	0.479	5.98414e-253	5	ADAM23
1.08786e-255	0.625434	0.384	0.12	3.83144e-251	5	SETD7
1.5354e-249	0.864446	0.752	0.388	5.40766e-245	5	BTBD11
1.59844e-241	0.711154	0.974	0.926	5.62969e-237	5	RPLP1
2.99624e-239	0.94049	0.767	0.458	1.05528e-234	5	PDE4B
1.77736e-237	0.558605	0.437	0.153	6.25987e-233	5	FAM102A
2.03155e-237	0.480961	0.266	0.063	7.15514e-233	5	CEBPD
8.85135e-228	0.729716	0.404	0.137	3.11745e-223	5	ADAM19
1.62779e-223	0.662045	0.348	0.107	5.73306e-219	5	PATJ
7.23227e-221	0.595034	0.416	0.15	2.54721e-216	5	IL18R1
7.50827e-216	0.667963	0.491	0.207	2.64441e-211	5	LOC106994447
1.22165e-215	0.806886	0.557	0.264	4.30266e-211	5	SNX25
3.92105e-215	0.658413	0.291	0.082	1.38099e-210	5	LOC114676382
5.63921e-215	0.625161	0.51	0.207	1.98613e-210	5	SLAMF1
5.72765e-215	0.559077	0.252	0.06	2.01728e-210	5	CST6
8.82617e-215	0.559645	0.969	0.925	3.10858e-210	5	RPS14
3.58117e-211	0.8848	0.813	0.564	1.26129e-206	5	FOSB
5.13834e-210	0.812407	0.598	0.292	1.80972e-205	5	MPZL3
3.58379e-207	0.618751	0.334	0.105	1.26221e-202	5	KLRC1
7.5415e-200	0.759097	0.869	0.628	2.65611e-195	5	PDE7A
5.11084e-199	0.663322	0.971	0.934	1.80004e-194	5	TPT1
5.19018e-195	0.655824	0.53	0.24	1.82798e-190	5	ZNF618
1.42007e-192	0.568458	0.286	0.085	5.00149e-188	5	LOC106997133
1.111e-189	0.623511	0.46	0.188	3.91294e-185	5	ITGA6
1.65897e-189	0.612981	0.367	0.133	5.84289e-185	5	SNX30
9.33223e-189	0.878392	0.849	0.636	3.28681e-184	5	JUN
7.38987e-186	0.751229	0.587	0.307	2.60271e-181	5	MSRA
4.47167e-184	0.8166	0.565	0.292	1.57492e-179	5	NFKBIZ
1.02163e-183	0.750958	0.263	0.077	3.59818e-179	5	PARD3
4.35241e-182	0.694278	0.703	0.372	1.53292e-177	5	IKZF2
4.36251e-181	0.628501	0.572	0.294	1.53648e-176	5	PDCD4
1.92158e-180	0.772113	0.888	0.699	6.76779e-176	5	ARHGAP26
2.95723e-178	0.892017	0.759	0.5	1.04154e-173	5	FOS
3.02686e-175	1.0529	0.708	0.463	1.06606e-170	5	SLC2A3
2.10301e-170	0.838855	0.912	0.79	7.40681e-166	5	STAT4
5.6848e-169	0.662813	0.502	0.232	2.00219e-164	5	CRIM1
1.50752e-162	0.672299	0.416	0.182	5.30947e-158	5	CCDC50
2.47653e-162	0.848892	0.812	0.582	8.72234e-158	5	RPS15A
4.52083e-161	0.744708	0.677	0.423	1.59224e-156	5	GALM
5.90538e-159	0.682506	0.794	0.564	2.07987e-154	5	CARD11
4.06658e-156	0.631706	0.695	0.404	1.43225e-151	5	ZEB1
1.44324e-155	0.856524	0.694	0.463	5.08308e-151	5	AOPEP
1.25772e-153	1.08238	0.606	0.349	4.4297e-149	5	KLRB1
2.4772e-153	0.577511	0.514	0.259	8.72469e-149	5	MGAT4A
9.13994e-153	0.579805	0.957	0.896	3.21909e-148	5	RPL10A
2.42091e-152	0.635973	0.849	0.685	8.52643e-148	5	CCNL1
5.22762e-152	0.439772	0.376	0.149	1.84117e-147	5	TCF7
8.11662e-151	0.822237	0.978	0.921	2.85867e-146	5	LOC708686
1.13771e-149	0.747471	0.358	0.146	4.00701e-145	5	TNF
3.39823e-149	0.751234	0.862	0.675	1.19686e-144	5	BCL2
1.67194e-148	0.960801	0.689	0.451	5.88856e-144	5	FAM129A
1.20278e-147	0.899373	0.546	0.295	4.23619e-143	5	IL12RB2
1.88024e-146	0.524492	0.308	0.115	6.6222e-142	5	MICU3
4.0604e-145	0.979365	0.787	0.612	1.43007e-140	5	IER2
8.38604e-141	0.536578	0.427	0.198	2.95356e-136	5	IFNAR2
1.66685e-139	0.62288	0.712	0.449	5.87064e-135	5	MPP7
3.47352e-139	0.518063	0.864	0.678	1.22337e-134	5	NDFIP1
9.14062e-138	0.839404	0.693	0.443	3.21933e-133	5	IMMP2L
2.85391e-136	0.435513	0.967	0.918	1.00515e-131	5	RPL27A
3.93465e-134	0.589779	0.902	0.759	1.38579e-129	5	MGAT5
3.9559e-134	0.571314	0.947	0.862	1.39327e-129	5	PARP8
1.8971e-133	0.60483	0.29	0.112	6.6816e-129	5	GNAL
3.81557e-133	0.515707	0.965	0.936	1.34384e-128	5	RPS8
1.67531e-132	0.505898	0.966	0.928	5.90045e-128	5	RPL30
1.97071e-132	0.502797	0.842	0.6	6.94083e-128	5	PLAAT3
3.79648e-132	0.66574	0.539	0.304	1.33712e-127	5	IRAK2
2.09088e-128	0.682292	0.742	0.549	7.3641e-124	5	G3BP2
3.66429e-126	0.472714	0.369	0.163	1.29056e-121	5	LOC114676384
6.8954e-125	0.494154	0.964	0.911	2.42856e-120	5	RPS29
7.23254e-125	0.653094	0.825	0.662	2.5473e-120	5	RPS6KA3
3.21852e-124	0.970483	0.592	0.377	1.13356e-119	5	NFKBIA
3.38258e-121	0.566138	0.708	0.486	1.19134e-116	5	NCOA7
7.87833e-121	0.477776	0.612	0.368	2.77475e-116	5	KCNA3
9.70244e-118	0.578886	0.804	0.622	3.4172e-113	5	TNFAIP8
1.0593e-117	0.478951	0.688	0.433	3.73084e-113	5	LOC716034
5.12126e-116	0.322136	0.255	0.093	1.80371e-111	5	DPEP2
1.45547e-115	0.471082	0.425	0.204	5.12615e-111	5	RETREG1
3.52272e-115	0.489891	0.776	0.567	1.2407e-110	5	SEPTIN6
5.52186e-115	0.522552	0.874	0.738	1.9448e-110	5	MACF1
1.29696e-114	0.488421	0.98	0.916	4.56791e-110	5	STK17B
2.38762e-113	0.469212	0.431	0.223	8.40919e-109	5	GRAMD4
5.16528e-113	0.56005	0.742	0.559	1.81921e-108	5	CLINT1
8.38346e-113	0.393939	0.955	0.901	2.95265e-108	5	RPL23
1.1644e-112	0.67251	0.27	0.108	4.10101e-108	5	DST
3.12662e-109	0.542834	0.798	0.646	1.10119e-104	5	GOLGA4
5.01989e-109	0.454657	0.923	0.799	1.76801e-104	5	BTG1
6.77045e-109	0.359548	0.268	0.105	2.38455e-104	5	LOC106998533
6.99908e-109	0.44363	0.273	0.108	2.46508e-104	5	ZFYVE9
1.62684e-108	0.543325	0.608	0.368	5.72972e-104	5	GPRIN3
1.34816e-106	0.495876	0.617	0.381	4.74823e-102	5	ANTXR2
1.53865e-106	0.389084	0.412	0.2	5.41912e-102	5	STX3
3.48196e-106	0.437099	0.951	0.886	1.22635e-101	5	RPL9
1.62797e-105	0.836415	0.58	0.376	5.7337e-101	5	ZSWIM4
1.94047e-105	0.379158	0.324	0.145	6.83434e-101	5	GPR65
4.27204e-105	0.634654	0.752	0.54	1.50461e-100	5	MAML2
5.08017e-105	0.556485	0.868	0.72	1.78924e-100	5	FAM107B
2.64413e-104	0.970659	0.836	0.752	9.31264e-100	5	CD69
5.70788e-103	0.718577	0.538	0.332	2.01032e-98	5	RASGEF1B
1.04365e-102	0.638609	0.549	0.329	3.67574e-98	5	NRIP1
3.04481e-102	0.398489	0.966	0.918	1.07238e-97	5	RPLP2
3.62072e-102	0.575277	0.466	0.268	1.27522e-97	5	ARL5B
1.96103e-101	0.436889	0.968	0.917	6.90675e-97	5	RPS26
6.8939e-100	0.420242	0.395	0.207	2.42803e-95	5	SLC15A4
4.41643e-99	0.428412	0.86	0.731	1.55547e-94	5	PABPC1
1.07557e-98	0.464434	0.852	0.702	3.78816e-94	5	EEF1A1
1.56048e-97	0.423097	0.973	0.952	5.496e-93	5	RPS19
3.72926e-97	0.447144	0.408	0.215	1.31345e-92	5	FBXW8
4.79579e-97	0.480352	0.447	0.246	1.68908e-92	5	MAN1C1
1.0155e-96	0.515588	0.549	0.351	3.57658e-92	5	USP36
7.41693e-96	0.488049	0.536	0.323	2.61224e-91	5	SESN1
1.54724e-95	0.526671	0.804	0.653	5.44937e-91	5	TENT5C
1.27639e-94	0.77707	0.686	0.513	4.49544e-90	5	JUNB
3.28581e-94	0.363463	0.974	0.955	1.15726e-89	5	RPL13
9.0187e-94	0.484587	0.96	0.896	3.17639e-89	5	RPL23A
1.98527e-93	0.596595	0.51	0.308	6.99213e-89	5	CRY1
4.27511e-93	0.469314	0.953	0.878	1.50569e-88	5	RPS13
1.02121e-92	0.456992	0.862	0.689	3.5967e-88	5	TC2N
9.7078e-92	0.448656	0.599	0.405	3.41909e-87	5	PER1
1.31041e-90	0.417269	0.937	0.862	4.61526e-86	5	TNRC6B
2.71511e-90	0.450829	0.516	0.309	9.56261e-86	5	HNRNPLL
4.80626e-89	0.432626	0.973	0.939	1.69276e-84	5	RPL41
6.61009e-89	0.45109	0.853	0.692	2.32807e-84	5	KEG06-p04
1.60739e-88	0.465633	0.949	0.881	5.66122e-84	5	JUND
1.75612e-88	0.420534	0.927	0.779	6.18506e-84	5	CAMK4
3.31878e-88	0.3691	0.927	0.836	1.16887e-83	5	HSP90AB1
5.39574e-88	0.528707	0.531	0.34	1.90038e-83	5	ZNF652
8.90662e-88	0.487819	0.399	0.203	3.13691e-83	5	ANK3
1.24283e-87	0.446562	0.35	0.179	4.37726e-83	5	TET1
1.54144e-87	0.409787	0.331	0.161	5.42896e-83	5	ARHGAP5
1.98064e-87	0.337195	0.306	0.142	6.97581e-83	5	TNFRSF10D
2.35939e-87	0.390234	0.93	0.834	8.30979e-83	5	RPS17
2.38602e-85	0.562124	0.787	0.605	8.40355e-81	5	PPP2R2B
5.51925e-85	0.40381	0.31	0.144	1.94388e-80	5	PCNX2
4.85875e-84	0.7026	0.773	0.646	1.71125e-79	5	ZFP36
8.07409e-84	0.394639	0.971	0.926	2.84369e-79	5	RPS7
1.48523e-83	0.499108	0.672	0.494	5.23099e-79	5	PCGF5
4.04337e-83	0.464925	0.724	0.508	1.42407e-78	5	GNAQ
5.02771e-83	0.456338	0.736	0.556	1.77076e-78	5	CCDC91
7.80818e-83	0.477665	0.74	0.575	2.75004e-78	5	ASAP1
3.5391e-82	0.386639	0.482	0.296	1.24647e-77	5	CERK
3.69481e-82	0.458858	0.972	0.928	1.30131e-77	5	EML4
1.2347e-80	0.429366	0.918	0.86	4.34862e-76	5	PIP4K2A
7.4449e-80	0.413775	0.404	0.23	2.62209e-75	5	SH2D2A
1.93961e-79	0.421003	0.755	0.591	6.83129e-75	5	SENP7
4.96755e-79	0.381922	0.561	0.343	1.74957e-74	5	GZMK
8.83061e-78	0.39079	0.888	0.761	3.11014e-73	5	RPL14
2.68505e-77	0.398026	0.566	0.376	9.45674e-73	5	CKLF
4.22308e-77	0.38678	0.895	0.779	1.48737e-72	5	PNRC1
7.20969e-77	0.379595	0.965	0.925	2.53925e-72	5	RPS16
1.02957e-76	0.379161	0.945	0.827	3.62613e-72	5	LOC710951
1.423e-76	0.484948	0.761	0.597	5.01179e-72	5	LOC114674108
5.61245e-75	0.349965	0.431	0.252	1.97671e-70	5	FUOM
1.05468e-74	0.324681	0.434	0.249	3.71459e-70	5	DENND2D
5.00017e-74	0.406477	0.477	0.296	1.76106e-69	5	NABP1
6.96626e-74	0.384289	0.834	0.624	2.45352e-69	5	LOC697476
2.40223e-73	0.412427	0.633	0.426	8.46064e-69	5	CD96
2.54223e-73	0.464726	0.803	0.661	8.95373e-69	5	RERE
3.09839e-73	0.442249	0.45	0.273	1.09125e-68	5	SLC16A7
5.31531e-73	0.405377	0.576	0.399	1.87205e-68	5	HDLBP
1.88956e-72	0.378282	0.471	0.293	6.65503e-68	5	SIK1
2.34929e-72	0.29751	0.251	0.115	8.27421e-68	5	CDC42EP3
4.12043e-72	0.381798	0.971	0.955	1.45122e-67	5	RPS18
7.26251e-72	0.368762	0.869	0.761	2.55786e-67	5	PAK2
8.77564e-72	0.427429	0.351	0.195	3.09078e-67	5	UGCG
9.26726e-72	0.36543	0.961	0.91	3.26393e-67	5	RPS11
9.43338e-72	0.379895	0.898	0.805	3.32243e-67	5	CCND3
1.44096e-71	0.413455	0.607	0.417	5.07505e-67	5	LOC114674016
1.49436e-71	0.280266	0.272	0.128	5.26315e-67	5	RCAN3
2.22988e-71	0.373345	0.964	0.916	7.85362e-67	5	RPL6
5.661e-71	0.388077	0.964	0.919	1.9938e-66	5	RPS27A-1
6.19427e-71	0.653065	0.375	0.223	2.18162e-66	5	DUSP16
6.30175e-70	0.377741	0.952	0.889	2.21948e-65	5	RPS4X
6.47159e-70	0.37662	0.591	0.393	2.27929e-65	5	PLEKHG1
6.58979e-70	0.450358	0.835	0.728	2.32092e-65	5	ARIH1
7.00074e-70	0.551898	0.584	0.426	2.46566e-65	5	PTPN9
9.82228e-70	0.495535	0.49	0.304	3.45941e-65	5	MYO1D
1.53979e-69	0.384182	0.354	0.196	5.42315e-65	5	KIAA0355
2.66015e-69	0.357343	0.966	0.925	9.36905e-65	5	RPS10
6.35375e-69	0.423685	0.537	0.365	2.23779e-64	5	TMEM71
1.94406e-68	0.40608	0.79	0.64	6.84698e-64	5	RAPGEF6
2.34283e-68	0.375615	0.956	0.904	8.25145e-64	5	RPL12
3.3187e-68	0.550448	0.396	0.235	1.16885e-63	5	CSF1
4.81243e-68	0.433339	0.523	0.348	1.69494e-63	5	LMBR1
1.03303e-67	0.4132	0.954	0.883	3.63832e-63	5	RPL34
1.16265e-67	0.3499	0.446	0.264	4.09484e-63	5	SIPA1L2
1.10397e-66	0.270404	0.262	0.126	3.88817e-62	5	PVRIG
1.34203e-66	0.383522	0.894	0.799	4.72662e-62	5	DOCK10
1.54978e-66	0.348518	0.931	0.859	5.45833e-62	5	EEF1B2
9.92928e-66	0.513526	0.529	0.346	3.49709e-61	5	ZC3H12B
1.51905e-65	0.363296	0.96	0.906	5.35009e-61	5	RPL38
2.16741e-65	0.252097	0.263	0.128	7.63363e-61	5	ENO2
3.06357e-65	0.319169	0.937	0.858	1.07899e-60	5	LCP1
6.93449e-65	0.428431	0.743	0.6	2.44233e-60	5	TUT4
8.57875e-65	0.45626	0.268	0.134	3.02144e-60	5	CD28
1.01745e-64	0.363879	0.306	0.164	3.58345e-60	5	LST1
1.35407e-64	0.390051	0.741	0.577	4.76903e-60	5	LOC106999943
1.99242e-64	0.470905	0.592	0.425	7.01729e-60	5	MAP2K6
2.03098e-64	0.354451	0.562	0.377	7.1531e-60	5	TGFBR1
2.41074e-64	0.397083	0.957	0.893	8.49061e-60	5	LOC703455
1.32089e-63	0.364999	0.96	0.921	4.65217e-59	5	RPS23
1.76425e-63	0.385683	0.528	0.371	6.21367e-59	5	ELK3
3.41009e-63	0.680382	0.284	0.151	1.20103e-58	5	UBE2E2
6.01084e-63	0.398165	0.25	0.122	2.11702e-58	5	NBEA
7.05746e-63	0.328677	0.949	0.918	2.48564e-58	5	RPS5
9.09803e-63	0.322803	0.322	0.176	3.20433e-58	5	NOL4L
9.63913e-63	0.322298	0.926	0.837	3.3949e-58	5	FYN
1.59085e-62	0.401716	0.67	0.514	5.60298e-58	5	SNTB2
4.21197e-62	0.347375	0.963	0.917	1.48345e-57	5	RPS20
7.39487e-62	0.43059	0.725	0.583	2.60447e-57	5	AFF1
9.84921e-62	0.453848	0.507	0.34	3.46889e-57	5	FOXO3
2.67237e-61	0.367763	0.957	0.89	9.41209e-57	5	RPS28
4.54476e-61	0.345609	0.965	0.932	1.60066e-56	5	RPL18
4.83681e-61	0.396072	0.276	0.14	1.70352e-56	5	ARHGAP10
1.05115e-60	0.326963	0.391	0.23	3.70215e-56	5	INPP5A
1.87836e-60	0.470239	0.351	0.202	6.61557e-56	5	ATF3
1.09853e-59	0.359306	0.459	0.296	3.86901e-55	5	RAB11FIP1
2.25152e-59	0.329359	0.359	0.208	7.92984e-55	5	KLHL6
2.92781e-59	0.367738	0.963	0.932	1.03117e-54	5	RPS12
2.94275e-59	0.329373	0.456	0.294	1.03644e-54	5	FLT3LG
2.06289e-58	0.424212	0.404	0.252	7.26549e-54	5	GATA3
2.90614e-58	0.471231	0.732	0.594	1.02354e-53	5	RGCC
6.64807e-58	0.343203	0.967	0.931	2.34145e-53	5	RPL10
8.86124e-58	0.520022	0.452	0.303	3.12093e-53	5	ARHGAP18
2.33096e-57	0.329756	0.864	0.712	8.20963e-53	5	LOC114669857
2.33722e-57	0.34956	0.566	0.404	8.23171e-53	5	ARNTL
2.6009e-57	0.308216	0.282	0.15	9.16039e-53	5	IQCN
3.57404e-57	0.370881	0.502	0.335	1.25878e-52	5	SYNE2
5.71451e-57	0.295882	0.254	0.13	2.01265e-52	5	TNFSF8
5.73777e-57	0.307103	0.957	0.906	2.02084e-52	5	RPL7A
7.26681e-57	0.368449	0.41	0.258	2.55937e-52	5	TOB1
1.58495e-56	0.366712	0.96	0.891	5.58218e-52	5	RPL22
2.62558e-56	0.376852	0.944	0.883	9.2473e-52	5	SIK3
4.47524e-56	0.326524	0.722	0.579	1.57618e-51	5	IL10RB
5.90012e-56	0.412742	0.57	0.422	2.07802e-51	5	TMEM164
6.03923e-56	0.302739	0.373	0.225	2.12702e-51	5	RPL31
6.13052e-56	0.292974	0.366	0.218	2.15917e-51	5	SMCO4
6.14012e-56	0.287107	0.307	0.167	2.16255e-51	5	CHD7
6.19114e-56	0.369757	0.95	0.88	2.18052e-51	5	RPL24
6.6811e-56	0.276121	0.297	0.164	2.35308e-51	5	PDIA4
9.73499e-56	0.278584	0.39	0.23	3.42866e-51	5	DHRS3
2.73756e-55	0.551621	0.882	0.803	9.64168e-51	5	ID2
5.75058e-55	0.380967	0.672	0.531	2.02535e-50	5	TNRC6C
5.82575e-55	0.290915	0.876	0.789	2.05183e-50	5	STK4
1.93504e-54	0.268081	0.26	0.136	6.81521e-50	5	PAOX
6.36714e-54	0.597811	0.588	0.449	2.24251e-49	5	JMY
1.03124e-53	0.36048	0.709	0.576	3.63202e-49	5	HSP90B1
1.23408e-53	0.313597	0.394	0.243	4.34644e-49	5	SOCS1
1.30811e-53	0.344556	0.754	0.628	4.60716e-49	5	ATM
5.08721e-53	0.349757	0.647	0.5	1.79172e-48	5	STIM2
8.17092e-53	0.297339	0.282	0.157	2.8778e-48	5	IER5
1.0416e-52	0.340098	0.648	0.484	3.66852e-48	5	ST6GAL1
1.19644e-52	0.414033	0.482	0.329	4.21385e-48	5	NF1
1.31257e-52	0.331348	0.351	0.212	4.62288e-48	5	IFFO2
1.42462e-52	0.282625	0.412	0.264	5.01752e-48	5	HPCAL1
1.60534e-52	0.311566	0.957	0.888	5.65399e-48	5	RPLP0
2.22258e-52	0.336331	0.279	0.156	7.82793e-48	5	BCL6
2.28874e-52	0.343503	0.514	0.366	8.06093e-48	5	ECHDC1
3.73007e-52	0.291647	0.807	0.691	1.31373e-47	5	SRSF3
1.01695e-51	0.305633	0.774	0.656	3.5817e-47	5	FUS
3.31011e-51	0.330082	0.751	0.622	1.16582e-46	5	TMEM131L
6.99716e-51	0.387908	0.39	0.249	2.4644e-46	5	PER3
7.73406e-50	0.2548	0.634	0.465	2.72394e-45	5	RPL22L1
9.54342e-50	0.343534	0.695	0.569	3.36119e-45	5	ARHGEF6
1.90134e-49	0.356363	0.416	0.275	6.6965e-45	5	RCHY1
2.49002e-49	0.565377	0.756	0.642	8.76986e-45	5	DENND4A
3.16747e-49	0.284719	0.382	0.243	1.11558e-44	5	IFNAR1
8.49319e-49	0.630664	0.524	0.394	2.9913e-44	5	NFKB1
1.25419e-48	0.342532	0.693	0.573	4.41726e-44	5	SND1
7.49905e-48	0.363093	0.289	0.168	2.64116e-43	5	STRBP
1.01826e-47	0.416363	0.539	0.391	3.58632e-43	5	EXT1
1.07899e-47	0.345068	0.729	0.586	3.80019e-43	5	LOC716530
1.11663e-47	0.376152	0.699	0.579	3.93278e-43	5	YPEL5
4.54934e-47	0.288567	0.391	0.249	1.60228e-42	5	ARSG
6.55182e-46	0.290132	0.448	0.303	2.30755e-41	5	GADD45B
7.51314e-46	0.442898	0.303	0.183	2.64613e-41	5	MAP3K8
1.04966e-45	0.349806	0.469	0.327	3.69689e-41	5	CLOCK
1.05212e-45	0.357013	0.491	0.35	3.70556e-41	5	REPS1
1.49831e-45	0.250328	0.949	0.896	5.27706e-41	5	NACA
1.69226e-45	0.253458	0.96	0.93	5.96014e-41	5	RPS9
1.97477e-45	0.311019	0.942	0.867	6.95514e-41	5	RPL37A-1
2.90613e-45	0.288755	0.499	0.351	1.02354e-40	5	LOC696998
1.09061e-44	0.349847	0.963	0.914	3.84114e-40	5	RPS21
1.18371e-44	0.298472	0.741	0.613	4.16904e-40	5	NPM1
1.88441e-44	0.319398	0.579	0.448	6.6369e-40	5	SPTAN1
1.95713e-44	0.257103	0.268	0.152	6.89301e-40	5	FGFR1OP
2.05704e-44	0.319652	0.7	0.595	7.24488e-40	5	SMAP1
2.55797e-44	0.287484	0.922	0.841	9.00916e-40	5	TOMM7
2.83318e-44	0.34187	0.749	0.622	9.97847e-40	5	HSPA5
3.3904e-44	0.319526	0.552	0.41	1.1941e-39	5	NR1D2
5.09139e-44	0.314489	0.363	0.232	1.79319e-39	5	ALPK1
6.09973e-44	0.317964	0.415	0.272	2.14832e-39	5	THY1
8.40258e-44	0.262537	0.345	0.213	2.95939e-39	5	SYNE3
9.14698e-44	0.262559	0.419	0.283	3.22157e-39	5	DYRK2
1.15892e-43	0.264202	0.409	0.267	4.08173e-39	5	SPINT2
1.79715e-43	0.334079	0.954	0.907	6.32955e-39	5	RPL28
1.83228e-43	0.313275	0.867	0.796	6.45329e-39	5	SCAPER
2.6726e-43	0.308473	0.629	0.493	9.41289e-39	5	LPIN1
3.14254e-43	0.279105	0.456	0.309	1.1068e-38	5	LOC714964
3.23195e-43	0.323811	0.375	0.247	1.13829e-38	5	TRIM44
8.24719e-43	0.262205	0.409	0.262	2.90466e-38	5	ZNF827
1.59699e-42	0.346767	0.352	0.228	5.62461e-38	5	PHTF2
1.84021e-42	0.299522	0.281	0.165	6.48122e-38	5	ZNF331
2.45962e-42	0.32318	0.656	0.524	8.6628e-38	5	PPP1R16B
2.86716e-42	0.333318	0.48	0.349	1.00981e-37	5	STARD3NL
2.86805e-42	0.343292	0.588	0.455	1.01013e-37	5	CDYL
2.97519e-42	0.324089	0.349	0.22	1.04786e-37	5	MAGED1
3.04723e-42	0.354342	0.435	0.302	1.07323e-37	5	ABCG2
7.56681e-42	0.346199	0.292	0.179	2.66503e-37	5	ITGAE
1.03507e-41	0.293153	0.855	0.778	3.64552e-37	5	HNRNPC
1.37445e-41	0.259095	0.317	0.197	4.8408e-37	5	MMD
1.46901e-41	0.283562	0.836	0.733	5.17385e-37	5	TBL1XR1
2.5774e-41	0.34702	0.466	0.336	9.07762e-37	5	MAP2K1
4.04801e-41	0.279273	0.822	0.717	1.42571e-36	5	RASGRP1
5.50608e-41	0.280438	0.353	0.228	1.93924e-36	5	SINHCAF
6.16728e-41	0.305554	0.836	0.763	2.17212e-36	5	COG5
6.59032e-41	0.322443	0.667	0.547	2.32111e-36	5	REL
6.6686e-41	0.27428	0.333	0.213	2.34868e-36	5	SLC7A6
7.3646e-41	0.374076	0.697	0.594	2.59381e-36	5	TLK1
7.36527e-41	0.30316	0.728	0.617	2.59405e-36	5	SMARCA2
1.25394e-40	0.296535	0.29	0.176	4.41638e-36	5	ARMC2
1.49198e-40	0.267654	0.893	0.831	5.25476e-36	5	LRBA
1.8438e-40	0.295602	0.719	0.595	6.49387e-36	5	GRAP2
2.0054e-40	0.322189	0.352	0.233	7.06303e-36	5	GLB1
3.40658e-40	0.28854	0.397	0.266	1.1998e-35	5	RREB1
3.88241e-40	0.300164	0.848	0.752	1.36738e-35	5	ZNF609
4.18966e-40	0.353545	0.477	0.348	1.4756e-35	5	IFRD1
1.30332e-39	0.337572	0.263	0.155	4.5903e-35	5	SCMH1
1.35145e-39	0.305938	0.708	0.613	4.7598e-35	5	HELZ
1.38417e-39	0.3729	0.769	0.668	4.87503e-35	5	GLS
2.30903e-39	0.260929	0.972	0.931	8.13241e-35	5	KEG06-r02
4.12116e-39	0.301815	0.549	0.424	1.45147e-34	5	LPXN
1.7104e-38	0.404514	0.25	0.147	6.02402e-34	5	ADAMTS6
2.41789e-38	0.307973	0.352	0.235	8.51582e-34	5	DUSP5
2.85572e-38	0.37007	0.856	0.76	1.00578e-33	5	EZR
3.47751e-38	0.25976	0.567	0.427	1.22478e-33	5	SEPTIN1
4.65739e-38	0.283718	0.68	0.566	1.64033e-33	5	SYNRG
9.88103e-38	0.307138	0.476	0.337	3.4801e-33	5	CPQ
1.03264e-37	0.261627	0.879	0.813	3.63695e-33	5	USP15
2.10172e-37	0.281338	0.911	0.856	7.40226e-33	5	YWHAZ
3.29649e-37	0.293773	0.564	0.431	1.16102e-32	5	LOC107000013
5.48136e-37	0.315759	0.315	0.204	1.93053e-32	5	SLC7A5
6.49448e-37	0.338712	0.511	0.383	2.28736e-32	5	BTG2
7.85582e-37	0.33972	0.587	0.461	2.76682e-32	5	SIPA1L1
1.25218e-36	0.294215	0.279	0.175	4.41019e-32	5	FOSL2
1.89145e-36	0.286626	0.623	0.491	6.6617e-32	5	TNFSF4
2.63169e-36	0.279518	0.547	0.42	9.26881e-32	5	EMB
2.78707e-36	0.333799	0.836	0.711	9.81607e-32	5	RPL32
2.79287e-36	0.255661	0.951	0.886	9.83649e-32	5	RPL15
3.33638e-36	0.283978	0.551	0.422	1.17507e-31	5	PRKD3
5.13012e-36	0.322987	0.251	0.151	1.80683e-31	5	TRIO
5.17153e-36	0.365246	0.612	0.489	1.82141e-31	5	SKAP2
7.8312e-36	0.337106	0.76	0.674	2.75815e-31	5	PTPN1
1.05004e-35	0.257356	0.325	0.206	3.69824e-31	5	MCF2L
1.70991e-35	0.325734	0.31	0.2	6.02232e-31	5	SPECC1
1.94723e-35	0.264559	0.585	0.458	6.85815e-31	5	USP44
2.00514e-35	0.332211	0.628	0.523	7.06211e-31	5	PCCA
3.07131e-35	0.268417	0.337	0.228	1.08172e-30	5	ARL3
3.54363e-35	0.287552	0.957	0.907	1.24807e-30	5	RPL11
7.49013e-35	0.25946	0.944	0.894	2.63802e-30	5	LOC712274
2.8319e-34	0.250335	0.426	0.305	9.97396e-30	5	D2HGDH
5.96291e-34	0.286039	0.771	0.662	2.10014e-29	5	DDX3X
8.43555e-34	0.295195	0.887	0.788	2.971e-29	5	RPS25
1.10001e-33	0.332357	0.603	0.494	3.87425e-29	5	SLC12A6
2.06923e-33	0.274626	0.935	0.853	7.28782e-29	5	RPL36
6.50307e-33	0.338637	0.539	0.43	2.29038e-28	5	PPP1R15A
7.18941e-33	0.30444	0.571	0.449	2.53211e-28	5	PDZD8
8.81247e-33	0.30772	0.934	0.853	3.10375e-28	5	RPL35A
1.28437e-32	0.304374	0.313	0.207	4.52354e-28	5	PRMT9
5.48666e-32	0.331184	0.316	0.209	1.9324e-27	5	SBF2
8.5611e-32	0.295049	0.757	0.673	3.01522e-27	5	RAB8B
1.41564e-31	0.263043	0.451	0.33	4.9859e-27	5	PRKAG2
1.4316e-31	0.25547	0.804	0.711	5.04209e-27	5	PACS1
2.33314e-31	0.306026	0.772	0.686	8.21732e-27	5	MAN1A1
3.65072e-31	0.267144	0.737	0.635	1.28578e-26	5	CEP85L
4.21495e-31	0.29617	0.762	0.676	1.48451e-26	5	FNDC3A
4.81706e-31	0.256303	0.734	0.646	1.69657e-26	5	BCLAF1
5.66905e-31	0.272107	0.775	0.682	1.99664e-26	5	ZFP36L2
7.39035e-31	0.258185	0.469	0.346	2.60288e-26	5	DAPK2
1.06716e-30	0.262862	0.583	0.471	3.75852e-26	5	NCK2
1.93256e-30	0.300823	0.313	0.211	6.80648e-26	5	RNF24
2.12089e-30	0.257714	0.351	0.248	7.46977e-26	5	FBXO7
2.35391e-30	0.371766	0.895	0.843	8.29047e-26	5	CD44
2.64313e-30	0.259796	0.537	0.426	9.3091e-26	5	SPECC1L
4.12475e-30	0.275971	0.727	0.629	1.45274e-25	5	GTDC1
8.22813e-30	0.272753	0.451	0.339	2.89795e-25	5	SREBF2
9.86292e-30	0.276577	0.677	0.562	3.47372e-25	5	CHN2
1.20847e-29	0.283003	0.622	0.512	4.25624e-25	5	INTS6
1.63845e-29	0.336316	0.634	0.54	5.77064e-25	5	NUFIP2
1.78037e-29	0.299727	0.549	0.43	6.27046e-25	5	CUX1
3.4227e-29	0.276316	0.925	0.864	1.20547e-24	5	ANKRD12
6.40431e-29	0.251521	0.534	0.423	2.2556e-24	5	ZZEF1
7.73165e-29	0.290736	0.314	0.212	2.72309e-24	5	BACH2
2.21671e-28	0.261667	0.456	0.349	7.80725e-24	5	NDEL1
2.36829e-28	0.332155	0.446	0.339	8.34113e-24	5	CASK
3.16605e-28	0.309431	0.597	0.49	1.11508e-23	5	RNF19A
5.34555e-28	0.253169	0.648	0.539	1.8827e-23	5	ARF4
1.61782e-27	0.251612	0.694	0.6	5.69797e-23	5	RPS6KA5
2.09662e-27	0.255296	0.862	0.797	7.38428e-23	5	SOS1
7.40959e-26	0.253374	0.329	0.228	2.60966e-21	5	AHCYL2
1.01644e-25	0.267583	0.266	0.179	3.57991e-21	5	EHD4
2.2137e-24	0.304107	0.704	0.623	7.79665e-20	5	SMYD3
6.05273e-24	0.267057	0.895	0.832	2.13177e-19	5	SYTL3
8.06298e-24	0.268506	0.273	0.188	2.83978e-19	5	MTHFD1L
9.90671e-24	0.302261	0.546	0.454	3.48914e-19	5	ATP1A1
1.65114e-23	0.260009	0.769	0.709	5.81532e-19	5	FNIP1
1.6682e-23	0.265854	0.3	0.214	5.87542e-19	5	CCDC97
3.49359e-22	0.295869	0.622	0.533	1.23044e-17	5	SQSTM1
1.75639e-21	0.257216	0.256	0.176	6.18599e-17	5	FAM117B
3.42391e-21	0.253733	0.545	0.464	1.2059e-16	5	HECTD4
1.15869e-19	0.252072	0.298	0.218	4.08092e-15	5	SLC35D1
1.94948e-19	0.265257	0.583	0.492	6.86608e-15	5	BHLHE40
8.00144e-19	0.26196	0.768	0.712	2.81811e-14	5	SLC38A1
1.5218e-14	0.47331	0.804	0.784	5.35979e-10	5	ADGRE5
1.68994e-14	0.259128	0.398	0.336	5.95196e-10	5	ANO10
1.32186e-13	0.325388	0.343	0.277	4.65558e-09	5	LOC704510
1.91579e-13	0.270894	0.262	0.2	6.74741e-09	5	LOC704083
6.41615e-11	0.333413	0.31	0.25	2.25977e-06	5	HDAC9
3.13345e-08	0.254663	0.613	0.58	0.0011036	5	GLUD1

## Sheet: Cluster 6
p_val	avg_log2FC	pct.1	pct.2	p_val_adj	cluster	gene
0	4.1552	0.953	0.274	0	6	PLXDC2
0	3.87705	0.817	0.142	0	6	APOE
0	3.71286	0.92	0.211	0	6	ST6GALNAC3
0	3.53923	0.923	0.159	0	6	DOCK4
0	3.50898	0.92	0.141	0	6	MEF2C
0	3.43277	0.879	0.139	0	6	C1QB
0	3.36563	0.883	0.134	0	6	C1QA
0	3.26146	0.901	0.116	0	6	LOC716834
0	3.24899	0.863	0.097	0	6	C1QC
0	3.12998	0.902	0.142	0	6	SLC8A1
0	3.11533	0.881	0.11	0	6	ASTN2
0	3.04559	0.885	0.122	0	6	FRMD4A
0	2.99427	0.864	0.091	0	6	MARCKS
0	2.87432	0.862	0.128	0	6	KCNQ3
0	2.86215	0.899	0.171	0	6	CC2D2B
0	2.85665	0.871	0.117	0	6	P2RY12
0	2.85591	0.89	0.162	0	6	GAB2
0	2.84864	0.885	0.091	0	6	C3
0	2.81301	0.872	0.115	0	6	TMCC3
0	2.80267	0.841	0.096	0	6	CFD
0	2.79311	0.921	0.411	0	6	RNASET2
0	2.72764	0.861	0.085	0	6	HTRA1
0	2.7228	0.94	0.477	0	6	SRGAP2
0	2.7077	0.879	0.071	0	6	CSF1R
0	2.62561	0.866	0.054	0	6	MS4A7
0	2.61228	0.857	0.076	0	6	NAV3
0	2.59915	0.834	0.089	0	6	MERTK
0	2.56915	0.839	0.09	0	6	GPR34
0	2.54344	0.875	0.226	0	6	CD83
0	2.52852	0.847	0.069	0	6	LGMN
0	2.50004	0.801	0.078	0	6	VMO1
0	2.49903	0.852	0.061	0	6	ARHGAP22
0	2.49433	0.69	0.082	0	6	CDH13
0	2.46689	0.878	0.261	0	6	AUTS2
0	2.38866	0.831	0.062	0	6	NCKAP5
0	2.38379	0.868	0.158	0	6	EPB41L2
0	2.35049	0.814	0.086	0	6	LRMDA
0	2.34633	0.847	0.118	0	6	LDLRAD4
0	2.28231	0.817	0.061	0	6	SH3RF3
0	2.27162	0.761	0.066	0	6	ARHGAP24
0	2.25783	0.839	0.065	0	6	PALD1
0	2.20957	0.804	0.041	0	6	P2RY13
0	2.20369	0.483	0.043	0	6	SPP1
0	2.19381	0.808	0.047	0	6	GUCY1A1
0	2.18589	0.873	0.212	0	6	CTSB
0	2.16469	0.845	0.137	0	6	RGS10
0	2.15186	0.921	0.529	0	6	MEF2A
0	2.11498	0.803	0.064	0	6	FGD4
0	2.10461	0.861	0.209	0	6	MTSS1
0	2.1045	0.796	0.047	0	6	LTC4S
0	2.10336	0.929	0.532	0	6	QKI
0	2.09884	0.789	0.375	0	6	CCL4L1
0	2.08117	0.564	0.097	0	6	HSPA1A
0	2.06889	0.799	0.075	0	6	LOC703641
0	2.05848	0.777	0.044	0	6	PLD1
0	2.04382	0.775	0.055	0	6	BNC2
0	2.03624	0.758	0.033	0	6	ADAM28
0	2.02949	0.743	0.044	0	6	SLC1A3
0	2.01649	0.779	0.04	0	6	BHLHE41
0	2.00738	0.844	0.164	0	6	DNM3
0	1.98613	0.627	0.033	0	6	SYNDIG1
0	1.98095	0.772	0.034	0	6	CTTNBP2
0	1.98082	0.794	0.046	0	6	MNDA
0	1.97627	0.799	0.05	0	6	FAM149A
0	1.97002	0.844	0.309	0	6	SAT1
0	1.96189	0.841	0.229	0	6	IFNGR1
0	1.95987	0.827	0.149	0	6	ABCC4
0	1.93977	0.771	0.026	0	6	TLR4
0	1.92717	0.912	0.523	0	6	ZSWIM6
0	1.90531	0.892	0.424	0	6	SNX29
0	1.88803	0.916	0.597	0	6	ZFP36L1
0	1.87799	0.804	0.056	0	6	ZFHX3
0	1.87489	0.741	0.08	0	6	SOCS6
0	1.87043	0.786	0.119	0	6	ITM2C
0	1.86833	0.762	0.045	0	6	RBM47
0	1.8374	0.695	0.049	0	6	CACNB4
0	1.82987	0.775	0.087	0	6	CREG1
0	1.80578	0.863	0.294	0	6	PSAP
0	1.79619	0.702	0.024	0	6	LOC106999008
0	1.79038	0.849	0.214	0	6	LYN
0	1.78891	0.638	0.026	0	6	TNFAIP8L3
0	1.78012	0.685	0.038	0	6	TNFRSF21
0	1.77804	0.798	0.07	0	6	IFNGR2
0	1.75943	0.885	0.452	0	6	RGS1
0	1.74999	0.77	0.037	0	6	FGFR1
0	1.74621	0.734	0.038	0	6	AIF1
0	1.7457	0.779	0.045	0	6	SLCO2B1
0	1.74503	0.741	0.068	0	6	ARHGAP21
0	1.74464	0.847	0.239	0	6	SIPA1L2
0	1.72027	0.86	0.409	0	6	PELI1
0	1.71965	0.792	0.099	0	6	LRP11
0	1.71436	0.77	0.039	0	6	WDFY3
0	1.70139	0.774	0.038	0	6	PRCP
0	1.69767	0.746	0.037	0	6	IL13RA1
0	1.69403	0.738	0.038	0	6	ITGB5
0	1.68815	0.711	0.037	0	6	DEPTOR
0	1.68271	0.655	0.03	0	6	CST3
0	1.6815	0.467	0.07	0	6	PLD5
0	1.6674	0.938	0.661	0	6	SLC9A9
0	1.65937	0.858	0.448	0	6	CD74
0	1.65791	0.732	0.028	0	6	RUBCNL
0	1.63198	0.683	0.03	0	6	MTUS1
0	1.62995	0.75	0.036	0	6	SLC2A5
0	1.62559	0.718	0.018	0	6	TREML1
0	1.62096	0.789	0.13	0	6	FCER1G
0	1.60729	0.82	0.258	0	6	BIN1
0	1.60722	0.692	0.142	0	6	TEX14
0	1.60194	0.787	0.171	0	6	SESN3
0	1.5997	0.68	0.102	0	6	RHOB
0	1.5965	0.726	0.045	0	6	LHFPL2
0	1.59569	0.777	0.083	0	6	FMNL3
0	1.59239	0.749	0.087	0	6	IGSF6
0	1.57402	0.818	0.261	0	6	IL18
0	1.57263	0.715	0.025	0	6	TREM2
0	1.5712	0.785	0.118	0	6	UBE2E2
0	1.56763	0.726	0.068	0	6	SLC2A13
0	1.56435	0.777	0.105	0	6	GNG7
0	1.56188	0.804	0.14	0	6	TLN2
0	1.55876	0.698	0.021	0	6	OLFML3
0	1.55842	0.66	0.02	0	6	PLA2G4A
0	1.55714	0.708	0.027	0	6	PLA2R1
0	1.53962	0.573	0.069	0	6	SDK1
0	1.53633	0.782	0.218	0	6	HDAC9
0	1.52769	0.719	0.057	0	6	CTSH
0	1.51532	0.908	0.604	0	6	FCHSD2
0	1.51034	0.707	0.069	0	6	CLCN5
0	1.50647	0.856	0.424	0	6	YWHAH
0	1.50558	0.723	0.024	0	6	LY86
0	1.50067	0.839	0.395	0	6	FRMD4B
0	1.50054	0.672	0.026	0	6	TBXAS1
0	1.49345	0.827	0.335	0	6	SELPLG
0	1.49272	0.807	0.186	0	6	AP1B1
0	1.48858	0.879	0.54	0	6	SMAP2
0	1.48811	0.905	0.569	0	6	ABR
0	1.478	0.69	0.058	0	6	TBC1D4
0	1.47717	0.78	0.137	0	6	CHD7
0	1.47621	0.692	0.025	0	6	PLEKHH2
0	1.45568	0.74	0.108	0	6	MAML3
0	1.45009	0.639	0.061	0	6	KCNK13
0	1.43858	0.824	0.273	0	6	MAF
0	1.43134	0.612	0.184	0	6	LOC100426537
0	1.43058	0.877	0.251	0	6	TYROBP
0	1.42487	0.665	0.039	0	6	SPRED1
0	1.42231	0.726	0.245	0	6	HIST1H2AC
0	1.42073	0.633	0.027	0	6	RIN2
0	1.41706	0.732	0.04	0	6	CYFIP1
0	1.41349	0.711	0.039	0	6	SCN1B
0	1.408	0.788	0.241	0	6	LOC695533
0	1.4072	0.657	0.043	0	6	TANC1
0	1.40591	0.726	0.054	0	6	RAB31
0	1.40153	0.665	0.038	0	6	ATP6V0A1
0	1.40099	0.253	0.016	0	6	APOC1
0	1.39015	0.674	0.034	0	6	TBC1D12
0	1.38953	0.843	0.37	0	6	APLP2
0	1.38917	0.861	0.396	0	6	CX3CR1
0	1.38695	0.951	0.692	0	6	LOC106993196
0	1.3621	0.674	0.034	0	6	BLNK
0	1.35993	0.612	0.052	0	6	FMNL2
0	1.34734	0.677	0.071	0	6	LOC701504
0	1.34722	0.557	0.029	0	6	RGL1
0	1.33872	0.577	0.021	0	6	OLR1
0	1.33618	0.82	0.308	0	6	OXR1
0	1.33442	0.52	0.017	0	6	RARRES2
0	1.33238	0.787	0.178	0	6	RNF130
0	1.32972	0.64	0.014	0	6	FCGR1A
0	1.32888	0.585	0.022	0	6	JDP2
0	1.32559	0.657	0.023	0	6	SELENOP
0	1.31559	0.81	0.364	0	6	BTG2
0	1.3131	0.739	0.106	0	6	APP
0	1.31134	0.681	0.049	0	6	2024-03-01
0	1.30955	0.668	0.02	0	6	PTAFR
0	1.30853	0.585	0.026	0	6	TBC1D9
0	1.30621	0.637	0.024	0	6	RASL10A
0	1.30431	0.682	0.287	0	6	RTTN
0	1.29638	0.64	0.021	0	6	LPCAT2
0	1.29209	0.789	0.258	0	6	SSH1
0	1.29196	0.665	0.221	0	6	MAMU-DRA
0	1.28819	0.686	0.041	0	6	PMEPA1
0	1.28794	0.696	0.114	0	6	NPC2
0	1.28529	0.618	0.037	0	6	ETV5
0	1.27922	0.68	0.02	0	6	LRP1
0	1.27239	0.615	0.021	0	6	MRC1
0	1.27172	0.634	0.023	0	6	ASTN1
0	1.27098	0.622	0.015	0	6	C3AR1
0	1.26605	0.641	0.109	0	6	RGS2
0	1.25968	0.708	0.128	0	6	CHKA
0	1.2548	0.545	0.021	0	6	RASGEF1C
0	1.24987	0.616	0.079	0	6	TTC28
0	1.24856	0.651	0.039	0	6	OSBPL1A
0	1.24341	0.608	0.026	0	6	LOC718454
0	1.24223	0.643	0.026	0	6	TCF4
0	1.23906	0.954	0.852	0	6	FTL
0	1.23868	0.624	0.018	0	6	GAS6
0	1.2336	0.665	0.019	0	6	SIRPA
0	1.22607	0.741	0.167	0	6	ATP8B4
0	1.21642	0.722	0.112	0	6	DRAM2
0	1.21264	0.931	0.814	0	6	SORL1
0	1.21142	0.408	0.018	0	6	MSR1
0	1.20893	0.657	0.038	0	6	MVB12B
0	1.20263	0.646	0.025	0	6	KCTD12
0	1.2023	0.631	0.017	0	6	C5AR1
0	1.19464	0.75	0.18	0	6	SBF2
0	1.19006	0.483	0.019	0	6	EDA
0	1.18913	0.517	0.021	0	6	CALCRL
0	1.18574	0.589	0.045	0	6	PTPRM
0	1.18471	0.629	0.022	0	6	SLC15A2
0	1.18343	0.564	0.045	0	6	CEBPD
0	1.17854	0.637	0.025	0	6	DAB2
0	1.17848	0.64	0.023	0	6	CTNND1
0	1.1649	0.704	0.144	0	6	NINJ1
0	1.16324	0.677	0.142	0	6	PEAK1
0	1.16012	0.634	0.02	0	6	CXCL16
0	1.15759	0.615	0.022	0	6	CEBPA
0	1.15234	0.649	0.097	0	6	KCNQ1
0	1.14892	0.611	0.017	0	6	TMEM176B
0	1.14867	0.733	0.305	0	6	CTSC
0	1.14571	0.552	0.017	0	6	GNB4
0	1.1448	0.665	0.089	0	6	ALOX5AP
0	1.14458	0.658	0.057	0	6	OGFRL1
0	1.14252	0.571	0.032	0	6	GPX1
0	1.14234	0.571	0.024	0	6	FMN1
0	1.14057	0.79	0.293	0	6	OSBPL11
0	1.14023	0.716	0.154	0	6	AOAH
0	1.13867	0.61	0.034	0	6	AZIN2
0	1.13835	0.698	0.154	0	6	NFIC
0	1.13581	0.612	0.025	0	6	TNS3
0	1.13554	0.366	0.012	0	6	LOC114671761
0	1.13417	0.484	0.028	0	6	ESRRG
0	1.12401	0.524	0.011	0	6	LOC106999905
0	1.1207	0.651	0.107	0	6	TRAK1
0	1.11705	0.93	0.793	0	6	ELMO1
0	1.11668	0.497	0.02	0	6	CD14
0	1.11505	0.606	0.043	0	6	PGM5
0	1.11255	0.748	0.237	0	6	CTSZ
0	1.11127	0.641	0.088	0	6	ASAH1
0	1.10655	0.74	0.148	0	6	CD4
0	1.10437	0.657	0.132	0	6	HAVCR2
0	1.10376	0.734	0.236	0	6	BRI3
0	1.09791	0.568	0.017	0	6	CCR1
0	1.09566	0.641	0.044	0	6	CTBP2
0	1.09467	0.545	0.017	0	6	CD163
0	1.09353	0.814	0.314	0	6	NRIP1
0	1.0822	0.856	0.556	0	6	CD81
0	1.07276	0.58	0.016	0	6	HCK
0	1.07057	0.566	0.007	0	6	LOC114669903
0	1.06584	0.578	0.036	0	6	FCGRT-1
0	1.06548	0.622	0.031	0	6	LPAR5
0	1.06458	0.453	0.015	0	6	RASAL2
0	1.06428	0.627	0.131	0	6	SCMH1
0	1.06162	0.719	0.109	0	6	SYK
0	1.0599	0.807	0.363	0	6	TGFBR1
0	1.05828	0.573	0.037	0	6	STOM
0	1.05675	0.599	0.021	0	6	AXL
0	1.05485	0.624	0.085	0	6	IRF8
0	1.05383	0.699	0.231	0	6	FAM13A
0	1.05278	0.347	0.023	0	6	HS3ST4
0	1.0492	0.592	0.102	0	6	SLC43A2
0	1.04898	0.709	0.151	0	6	ITGAM
0	1.04794	0.736	0.174	0	6	ARRB1
0	1.04617	0.531	0.013	0	6	ST3GAL6
0	1.04467	0.496	0.067	0	6	LOC106993838
0	1.03907	0.365	0.015	0	6	ZNF804A
0	1.03827	0.332	0.024	0	6	NAV2
0	1.03576	0.582	0.021	0	6	WDFY4
0	1.03492	0.711	0.168	0	6	SORT1
0	1.02832	0.694	0.158	0	6	BAZ2B
0	1.02738	0.645	0.053	0	6	IL6R
0	1.02663	0.578	0.016	0	6	TAL1
0	1.02482	0.605	0.021	0	6	SPI1
0	1.02373	0.576	0.017	0	6	EPB41L3
0	1.02211	0.476	0.06	0	6	CCL3
0	1.01893	0.933	0.817	0	6	INPP5D
0	1.01824	0.496	0.017	0	6	LOC106999016
0	1.01725	0.67	0.141	0	6	NFIA
0	1.01643	0.718	0.218	0	6	SLC49A4
0	1.01441	0.47	0.013	0	6	HS3ST1
0	1.00573	0.493	0.02	0	6	HK2
0	1.00559	0.816	0.382	0	6	OTULINL
0	1.00478	0.656	0.16	0	6	MAP3K8
0	0.999823	0.677	0.148	0	6	HEXB
0	0.998989	0.615	0.061	0	6	NEK6
0	0.9928	0.537	0.018	0	6	PXDC1
0	0.991558	0.396	0.015	0	6	SLC7A8
0	0.987487	0.466	0.022	0	6	VWF
0	0.986395	0.606	0.065	0	6	LRRK1
0	0.98472	0.564	0.02	0	6	CYP27A1
0	0.977408	0.49	0.013	0	6	SLC37A2
0	0.976979	0.574	0.019	0	6	CYBB
0	0.975372	0.612	0.059	0	6	MAN2B1
0	0.972676	0.542	0.015	0	6	ADAP2
0	0.97008	0.469	0.018	0	6	BCAR3
0	0.964625	0.546	0.021	0	6	SWAP70
0	0.963144	0.757	0.269	0	6	TNRC18
0	0.957878	0.617	0.122	0	6	MED12L
0	0.957017	0.516	0.022	0	6	FNBP1L
0	0.956121	0.534	0.017	0	6	KYNU
0	0.947542	0.588	0.068	0	6	HMGN3
0	0.946247	0.629	0.152	0	6	RNASE6
0	0.939906	0.722	0.266	0	6	ATP6V0B
0	0.937144	0.605	0.069	0	6	TRAF3IP1
0	0.936997	0.582	0.033	0	6	SIGLEC14
0	0.933564	0.545	0.014	0	6	LMO2
0	0.923096	0.692	0.175	0	6	SPECC1
0	0.922135	0.578	0.138	0	6	PI4K2A
0	0.922071	0.45	0.018	0	6	LOC709175
0	0.920373	0.518	0.024	0	6	RAPH1
0	0.919939	0.544	0.07	0	6	IFI30
0	0.919371	0.472	0.01	0	6	NRP2
0	0.918163	0.547	0.05	0	6	GLUL
0	0.918014	0.36	0.008	0	6	CALCR
0	0.91759	0.691	0.185	0	6	SERPINA1
0	0.914159	0.623	0.098	0	6	IDH1
0	0.912481	0.546	0.023	0	6	IRAK3
0	0.910392	0.711	0.226	0	6	ZNF710
0	0.909849	0.688	0.203	0	6	IL6ST
0	0.907528	0.34	0.007	0	6	PDK4
0	0.904058	0.514	0.062	0	6	SOBP
0	0.90391	0.573	0.109	0	6	ITGAV
0	0.9027	0.475	0.018	0	6	EPS8
0	0.90071	0.514	0.015	0	6	LRRK2
0	0.899072	0.469	0.055	0	6	OTUD1
0	0.897316	0.675	0.169	0	6	SLC25A37
0	0.897114	0.562	0.039	0	6	NINJ2
0	0.896884	0.506	0.017	0	6	SERPINF1
0	0.896313	0.621	0.122	0	6	MKNK1
0	0.895376	0.523	0.018	0	6	MPEG1
0	0.894299	0.719	0.275	0	6	VDAC1
0	0.89128	0.477	0.014	0	6	NUPR1
0	0.888094	0.409	0.01	0	6	TLR2
0	0.886021	0.482	0.01	0	6	ARHGAP29
0	0.883981	0.517	0.018	0	6	SOGA1
0	0.874857	0.683	0.191	0	6	PFKFB3
0	0.874104	0.507	0.027	0	6	BATF3
0	0.874098	0.631	0.126	0	6	TRIO
0	0.866676	0.562	0.135	0	6	DENND3
0	0.866062	0.657	0.152	0	6	SKIL
0	0.863161	0.443	0.013	0	6	SHTN1
0	0.862477	0.74	0.273	0	6	CPEB3
0	0.861293	0.484	0.014	0	6	BCO2
0	0.861281	0.554	0.043	0	6	TMEM231
0	0.860895	0.645	0.126	0	6	MANBA
0	0.856823	0.504	0.005	0	6	LOC106992911
0	0.855559	0.7	0.21	0	6	STX7
0	0.855489	0.669	0.19	0	6	TBC1D14
0	0.8546	0.486	0.026	0	6	JAM3
0	0.852412	0.394	0.013	0	6	FOLR2
0	0.849321	0.678	0.172	0	6	CNPY3
0	0.848784	0.685	0.191	0	6	USP6NL
0	0.847159	0.671	0.2	0	6	SNX18
0	0.845425	0.563	0.07	0	6	TIAM1
0	0.843428	0.424	0.014	0	6	LOC114676845
0	0.840128	0.777	0.342	0	6	PACSIN2
0	0.839987	0.735	0.278	0	6	PTPN12
0	0.838429	0.532	0.063	0	6	RECK
0	0.836108	0.654	0.177	0	6	HPS3
0	0.833646	0.619	0.107	0	6	SUSD3
0	0.829905	0.735	0.305	0	6	HERPUD1
0	0.825918	0.476	0.013	0	6	RGS18
0	0.819373	0.495	0.067	0	6	HMOX1
0	0.814599	0.442	0.01	0	6	TMEM144
0	0.813984	0.472	0.024	0	6	STAB1
0	0.812822	0.487	0.008	0	6	ADORA3
0	0.802646	0.555	0.092	0	6	GSAP
0	0.798221	0.629	0.15	0	6	PCYOX1
0	0.797525	0.456	0.011	0	6	LOC718403
0	0.794632	0.477	0.013	0	6	CTTNBP2NL
0	0.789045	0.569	0.115	0	6	TCF7L2
0	0.786611	0.627	0.141	0	6	GRN
0	0.786186	0.432	0.008	0	6	LOC106998259
0	0.784965	0.436	0.01	0	6	BASP1
0	0.782109	0.473	0.014	0	6	TNFSF13
0	0.776096	0.654	0.172	0	6	TM6SF1
0	0.775914	0.501	0.027	0	6	MRC2
0	0.775585	0.462	0.031	0	6	ZNRF1
0	0.775071	0.329	0.01	0	6	MAFB
0	0.771822	0.512	0.037	0	6	MAP4K3
0	0.76985	0.439	0.006	0	6	LOC106995137
0	0.768353	0.625	0.187	0	6	MCF2L
0	0.767909	0.414	0.02	0	6	SAMD4A
0	0.7628	0.462	0.016	0	6	RASGRP3
0	0.76032	0.484	0.025	0	6	SLC7A7
0	0.75881	0.642	0.198	0	6	KLHL5
0	0.756014	0.433	0.007	0	6	P2RY6
0	0.755907	0.672	0.235	0	6	MINK1
0	0.755626	0.513	0.049	0	6	MBOAT7
0	0.755497	0.621	0.209	0	6	PHC2
0	0.7522	0.596	0.145	0	6	LST1
0	0.749554	0.533	0.087	0	6	FAM89A
0	0.749056	0.624	0.181	0	6	FCHO2
0	0.746964	0.347	0.017	0	6	LOC114673087
0	0.742707	0.627	0.179	0	6	PPT1
0	0.741934	0.44	0.016	0	6	CMKLR1
0	0.740625	0.647	0.19	0	6	BMPR2
0	0.740234	0.486	0.012	0	6	TLR1
0	0.737012	0.581	0.178	0	6	MTHFD2
0	0.735531	0.335	0.009	0	6	RAB20
0	0.734958	0.419	0.021	0	6	DISC1
0	0.734261	0.405	0.057	0	6	DUSP6
0	0.730187	0.438	0.009	0	6	HHEX
0	0.729772	0.379	0.01	0	6	LOC114676844
0	0.729583	0.35	0.011	0	6	IGF1
0	0.727298	0.432	0.009	0	6	SALL1
0	0.724468	0.604	0.15	0	6	LAT2
0	0.72406	0.426	0.01	0	6	C1QTNF3
0	0.722278	0.555	0.118	0	6	MGST2
0	0.720806	0.459	0.074	0	6	SUSD4
0	0.719544	0.439	0.009	0	6	TMEM176A
0	0.716869	0.451	0.014	0	6	SIRPB2
0	0.715177	0.455	0.018	0	6	HVCN1
0	0.714966	0.367	0.009	0	6	PDPN
0	0.714899	0.289	0.011	0	6	NRP1
0	0.711023	0.352	0.029	0	6	RTN1
0	0.709696	0.357	0.014	0	6	MAP2
0	0.707815	0.543	0.113	0	6	TSPAN3
0	0.707213	0.536	0.1	0	6	PLCB2
0	0.705274	0.437	0.012	0	6	PAK1
0	0.704349	0.763	0.211	0	6	PLAC8
0	0.704096	0.44	0.011	0	6	MILR1
0	0.703628	0.445	0.021	0	6	DSE
0	0.702139	0.484	0.041	0	6	SCARB1
0	0.700976	0.626	0.178	0	6	SGPP1
0	0.700678	0.327	0.009	0	6	LPL
0	0.699309	0.432	0.01	0	6	NLRP1
0	0.69928	0.441	0.018	0	6	CD86
0	0.699117	0.41	0.009	0	6	BRINP2
0	0.69805	0.446	0.008	0	6	FGD2
0	0.692931	0.39	0.031	0	6	KLF4
0	0.692724	0.442	0.011	0	6	HACD1
0	0.687137	0.563	0.114	0	6	DPYSL2
0	0.686667	0.442	0.015	0	6	SPNS2
0	0.68383	0.421	0.028	0	6	LILRB1
0	0.683352	0.434	0.022	0	6	SLC18B1
0	0.683352	0.3	0.02	0	6	BEND5
0	0.681878	0.566	0.138	0	6	PPARD
0	0.681827	0.388	0.022	0	6	FRMD3
0	0.680037	0.443	0.012	0	6	PLVAP
0	0.680025	0.411	0.008	0	6	TLR7
0	0.674853	0.467	0.084	0	6	2024-03-03
0	0.674407	0.479	0.058	0	6	LOC693992
0	0.673425	0.422	0.008	0	6	POPDC3
0	0.668445	0.416	0.006	0	6	PLD4
0	0.665751	0.4	0.022	0	6	MAP3K20
0	0.664372	0.449	0.05	0	6	GCNT2
0	0.663613	0.395	0.028	0	6	ST5
0	0.662079	0.507	0.091	0	6	TMEM117
0	0.660216	0.688	0.232	0	6	MAN1C1
0	0.659668	0.467	0.047	0	6	CAMSAP2
0	0.654588	0.502	0.067	0	6	WWC2
0	0.653692	0.39	0.016	0	6	CD68
0	0.649398	0.54	0.114	0	6	EVI5
0	0.648862	0.459	0.067	0	6	NPL
0	0.647962	0.341	0.009	0	6	PRTFDC1
0	0.647467	0.496	0.114	0	6	LIPA
0	0.645384	0.446	0.078	0	6	LOC716161
0	0.638981	0.566	0.158	0	6	MAGED2
0	0.638859	0.368	0.039	0	6	MAMU-DMA
0	0.636169	0.308	0.014	0	6	HPGDS
0	0.635658	0.333	0.008	0	6	ENPEP
0	0.634346	0.34	0.011	0	6	PCOLCE2
0	0.633761	0.409	0.02	0	6	TJP1
0	0.627188	0.514	0.077	0	6	SPNS3
0	0.625942	0.391	0.01	0	6	TMEM86A
0	0.624973	0.429	0.033	0	6	PLA2G15
0	0.619334	0.656	0.213	0	6	DENND5A
0	0.61869	0.383	0.024	0	6	SCML1
0	0.617714	0.422	0.024	0	6	GATM
0	0.617297	0.39	0.011	0	6	RAB39A
0	0.617241	0.372	0.007	0	6	LOC107000533
0	0.616847	0.499	0.097	0	6	SLC39A13
0	0.612844	0.529	0.143	0	6	ABI3
0	0.611996	0.354	0.005	0	6	LOC114670015
0	0.607797	0.378	0.024	0	6	FSCN1
0	0.607485	0.568	0.148	0	6	LOC703700
0	0.60613	0.469	0.076	0	6	TPCN1
0	0.60497	0.59	0.177	0	6	GNS
0	0.604963	0.526	0.107	0	6	UNC93B1
0	0.603866	0.449	0.048	0	6	NCF2
0	0.602258	0.383	0.016	0	6	ARHGEF11
0	0.601948	0.314	0.042	0	6	RNLS
0	0.600867	0.388	0.011	0	6	NLRP3
0	0.600602	0.407	0.009	0	6	TFEC
0	0.599532	0.423	0.017	0	6	CDC42BPB
0	0.59804	0.335	0.005	0	6	LOC106998842
0	0.596523	0.376	0.015	0	6	CLEC4A
0	0.596318	0.423	0.031	0	6	ANXA4
0	0.596271	0.421	0.072	0	6	POU2F2
0	0.595606	0.318	0.012	0	6	RASSF8
0	0.59557	0.455	0.058	0	6	LYL1
0	0.594463	0.357	0.025	0	6	ITGA9
0	0.594371	0.337	0.033	0	6	SGK1
0	0.594274	0.339	0.019	0	6	RAMP1
0	0.592799	0.555	0.131	0	6	MFSD1
0	0.590418	0.254	0.02	0	6	KCNIP1
0	0.589274	0.299	0.017	0	6	PPARG
0	0.586915	0.584	0.181	0	6	SVBP
0	0.586456	0.441	0.047	0	6	TMEM268
0	0.584615	0.431	0.058	0	6	LAPTM4B
0	0.581859	0.382	0.054	0	6	CPOX
0	0.58164	0.405	0.015	0	6	LOC106995967
0	0.581297	0.517	0.129	0	6	RHBDF2
0	0.580485	0.368	0.006	0	6	SSPN
0	0.580382	0.365	0.015	0	6	MGLL
0	0.580222	0.487	0.096	0	6	DST
0	0.580062	0.496	0.09	0	6	CTNNA1
0	0.579382	0.51	0.128	0	6	LARP1B
0	0.579223	0.48	0.112	0	6	PITPNM2
0	0.579058	0.267	0.012	0	6	GABRA3
0	0.578997	0.485	0.082	0	6	ALDH2
0	0.575051	0.381	0.017	0	6	CD72
0	0.574883	0.401	0.012	0	6	PLXNB2
0	0.574842	0.481	0.097	0	6	EPN2
0	0.570639	0.419	0.045	0	6	ZNF532
0	0.570063	0.378	0.019	0	6	SLC25A29
0	0.56758	0.314	0.009	0	6	CKB
0	0.565783	0.258	0.012	0	6	KCTD16
0	0.565639	0.299	0.05	0	6	HIST1H2BJ
0	0.563998	0.315	0.016	0	6	CPED1
0	0.563945	0.351	0.019	0	6	BAIAP2
0	0.562333	0.32	0.014	0	6	CNTLN
0	0.561743	0.354	0.009	0	6	ALOX5
0	0.561454	0.388	0.041	0	6	SNX9
0	0.558114	0.366	0.005	0	6	FPR1
0	0.557255	0.391	0.014	0	6	CUX2
0	0.556252	0.339	0.012	0	6	CABLES1
0	0.554928	0.455	0.09	0	6	NCF4
0	0.55315	0.356	0.01	0	6	LOXHD1
0	0.551906	0.312	0.011	0	6	HRH1
0	0.547521	0.38	0.018	0	6	KCNMB1
0	0.547514	0.36	0.016	0	6	APCDD1
0	0.547025	0.277	0.011	0	6	LOC106993624
0	0.546435	0.354	0.029	0	6	KBTBD8
0	0.545113	0.408	0.054	0	6	AIG1
0	0.543547	0.458	0.101	0	6	LOC106996934
0	0.54353	0.479	0.122	0	6	RHOQ
0	0.543466	0.384	0.013	0	6	TMIGD3
0	0.542785	0.431	0.056	0	6	PAQR8
0	0.541619	0.376	0.035	0	6	SLC36A4
0	0.541376	0.304	0.008	0	6	AMOTL1
0	0.539803	0.357	0.01	0	6	BACE2
0	0.538213	0.38	0.037	0	6	WIPI1
0	0.537635	0.354	0.018	0	6	LUZP1
0	0.535831	0.319	0.017	0	6	IFI44L
0	0.53436	0.344	0.011	0	6	RAB11FIP5
0	0.532345	0.373	0.023	0	6	CD276
0	0.527569	0.361	0.007	0	6	CD180
0	0.525533	0.313	0.024	0	6	MAMU-DMB
0	0.520563	0.449	0.085	0	6	PIK3CB
0	0.520172	0.346	0.021	0	6	SFXN5
0	0.519554	0.332	0.002	0	6	LOC114671936
0	0.519469	0.361	0.043	0	6	RGS12
0	0.51898	0.417	0.057	0	6	TMEM273
0	0.518486	0.316	0.005	0	6	PDGFB
0	0.517756	0.352	0.033	0	6	ARHGEF40
0	0.514826	0.328	0.007	0	6	SNX7
0	0.512778	0.407	0.058	0	6	WDR91
0	0.51235	0.306	0.009	0	6	SCIN
0	0.510926	0.364	0.078	0	6	LOC107000817
0	0.509896	0.446	0.091	0	6	PALLD
0	0.507407	0.315	0.012	0	6	NAV1
0	0.506711	0.384	0.073	0	6	PLXNA2
0	0.506505	0.257	0.006	0	6	TSPAN7
0	0.503528	0.35	0.007	0	6	UPK3A
0	0.503403	0.298	0.05	0	6	NR4A1
0	0.501426	0.336	0.018	0	6	ERV3-1
0	0.499694	0.347	0.046	0	6	PKD2
0	0.498657	0.273	0.005	0	6	LOC106993226
0	0.496466	0.305	0.016	0	6	HES6
0	0.494293	0.256	0.017	0	6	MLF1
0	0.492505	0.482	0.112	0	6	HSPBAP1
0	0.492296	0.252	0.003	0	6	LOC100423855
0	0.491984	0.313	0.007	0	6	PTGDR2
0	0.491716	0.3	0.004	0	6	LOC722780
0	0.491443	0.335	0.008	0	6	MAG
0	0.48899	0.289	0.009	0	6	RNF217
0	0.488931	0.47	0.111	0	6	ZNF330
0	0.488904	0.297	0.016	0	6	PTK2
0	0.482921	0.422	0.076	0	6	RILPL1
0	0.480003	0.299	0.013	0	6	PLBD1
0	0.476267	0.253	0.008	0	6	P3H2
0	0.475611	0.346	0.017	0	6	TRPM2
0	0.475016	0.285	0.022	0	6	KBTBD12
0	0.472672	0.425	0.081	0	6	TEP1
0	0.469674	0.338	0.047	0	6	RNF122
0	0.466309	0.282	0.014	0	6	PLAT
0	0.46391	0.268	0.013	0	6	DERL3
0	0.458409	0.274	0.009	0	6	GASK1B
0	0.455208	0.312	0.015	0	6	LOXL3
0	0.455054	0.351	0.037	0	6	WFS1
0	0.454441	0.41	0.085	0	6	C10H20orf194
0	0.45312	0.29	0.006	0	6	PKDCC
0	0.452739	0.394	0.056	0	6	CD300A
0	0.452676	0.278	0.004	0	6	FRRS1L
0	0.452551	0.283	0.016	0	6	CELF4
0	0.451686	0.293	0.011	0	6	GARNL3
0	0.451371	0.428	0.09	0	6	LOC706568
0	0.4506	0.299	0.005	0	6	B3GNT5
0	0.450375	0.538	0.141	0	6	SLC24A3
0	0.449653	0.351	0.025	0	6	PTGS1
0	0.448705	0.371	0.038	0	6	CNDP2
0	0.447821	0.406	0.061	0	6	PRKCD
0	0.446742	0.356	0.04	0	6	TRPM8
0	0.446094	0.292	0.006	0	6	INTU
0	0.445643	0.259	0.007	0	6	GAB1
0	0.445204	0.31	0.007	0	6	TIMP2
0	0.444742	0.322	0.05	0	6	SLC29A1
0	0.443375	0.258	0.007	0	6	CPNE5
0	0.443345	0.271	0.005	0	6	RASA4B
0	0.442181	0.293	0.007	0	6	LRP6
0	0.442116	0.395	0.064	0	6	C9orf72
0	0.441634	0.266	0.01	0	6	EML1
0	0.441081	0.327	0.02	0	6	PHKG1
0	0.439045	0.414	0.088	0	6	RPS6KA4
0	0.436897	0.31	0.02	0	6	ERMAP
0	0.436151	0.29	0.005	0	6	TMEM158
0	0.43601	0.277	0.006	0	6	C1H1orf162
0	0.435501	0.313	0.011	0	6	GNA15
0	0.432722	0.33	0.056	0	6	PELI2
0	0.429419	0.394	0.067	0	6	PRAG1
0	0.428991	0.311	0.012	0	6	VASH1
0	0.428463	0.376	0.045	0	6	P2RX7
0	0.427279	0.286	0.004	0	6	ACSM5
0	0.427152	0.277	0.032	0	6	TBC1D8
0	0.426874	0.272	0.005	0	6	TDRP
0	0.426802	0.272	0.004	0	6	ELAVL4
0	0.426464	0.291	0.007	0	6	SLFN11
0	0.425755	0.391	0.067	0	6	ARHGAP31
0	0.422538	0.272	0.008	0	6	CD300LF
0	0.421451	0.331	0.04	0	6	CRYBG3
0	0.419176	0.31	0.006	0	6	BTK
0	0.414267	0.327	0.041	0	6	LOC107000077
0	0.413435	0.268	0.005	0	6	LOC114677495
0	0.409729	0.268	0.007	0	6	SYT6
0	0.408615	0.411	0.085	0	6	PSPH
0	0.408086	0.303	0.014	0	6	STAC3
0	0.407994	0.277	0.004	0	6	LOC106999262
0	0.40717	0.278	0.006	0	6	CUEDC1
0	0.403571	0.31	0.037	0	6	TTC7B
0	0.40218	0.312	0.047	0	6	SLC31A2
0	0.399211	0.375	0.068	0	6	GALNS
0	0.39735	0.261	0.004	0	6	LOC114676463
0	0.396776	0.264	0.007	0	6	CNRIP1
0	0.396244	0.26	0.006	0	6	RAB3IL1
0	0.396207	0.312	0.041	0	6	NUDT14
0	0.39585	0.257	0.005	0	6	SPATA6
0	0.394556	0.32	0.046	0	6	GRASP
0	0.394191	0.285	0.011	0	6	MLXIPL
0	0.392901	0.36	0.059	0	6	RASSF4
0	0.392714	0.324	0.053	0	6	PASK
0	0.392101	0.323	0.06	0	6	ZNF821
0	0.391915	0.316	0.055	0	6	LHFPL1
0	0.390875	0.299	0.051	0	6	UST
0	0.389934	0.263	0.007	0	6	SLC15A3
0	0.385202	0.295	0.048	0	6	SLC1A4
0	0.384867	0.25	0.017	0	6	CXHXorf21
0	0.384002	0.358	0.073	0	6	PARD3
0	0.383415	0.26	0.004	0	6	SLC46A1
0	0.383316	0.292	0.028	0	6	CTSL
0	0.383171	0.274	0.005	0	6	BVES
0	0.379022	0.282	0.01	0	6	C2
0	0.375573	0.307	0.045	0	6	PLPP1
0	0.375033	0.31	0.051	0	6	DNASE2
0	0.373841	0.345	0.039	0	6	LOC722148
0	0.373193	0.313	0.052	0	6	PARVB
0	0.372681	0.254	0.028	0	6	KIF13A
0	0.369513	0.268	0.01	0	6	IRF5
0	0.367225	0.281	0.02	0	6	FAM228B
0	0.365065	0.254	0.004	0	6	LOC106997485
0	0.364939	0.278	0.028	0	6	SGCB
0	0.364709	0.359	0.073	0	6	NCKAP5L
0	0.359701	0.261	0.02	0	6	NAIP
0	0.357842	0.312	0.044	0	6	LACTB2
0	0.353747	0.301	0.04	0	6	CSNK1E
0	0.351045	0.328	0.043	0	6	ZSCAN18
0	0.350517	0.262	0.012	0	6	FES
0	0.34267	0.322	0.051	0	6	NOD1
0	0.340549	0.303	0.041	0	6	PROS1
0	0.328269	0.293	0.05	0	6	KIAA0930
0	0.323096	0.312	0.05	0	6	KCNK6
0	0.322414	0.308	0.051	0	6	SUMF2
0	0.319702	0.263	0.017	0	6	SPTB
0	0.318979	0.316	0.053	0	6	WDSUB1
0	0.318557	0.262	0.027	0	6	CHPT1
0	0.313216	0.268	0.032	0	6	CLN8
0	0.310109	0.255	0.028	0	6	PLAG1
0	0.304915	0.296	0.05	0	6	MYO15B
0	0.298384	0.275	0.038	0	6	TLR6
0	0.295922	0.258	0.026	0	6	C14H11orf24
0	0.293196	0.274	0.043	0	6	PLCL1
0	0.281351	0.268	0.032	0	6	SLC29A3
2.17491e-307	0.504573	0.582	0.174	7.66003e-303	6	CCDC50
3.64971e-307	0.667561	0.656	0.233	1.28543e-302	6	LPAR6
1.90816e-306	0.928294	0.813	0.412	6.72053e-302	6	ATP2C1
2.66838e-305	0.699718	0.652	0.237	9.39804e-301	6	SNX5
2.02867e-303	1.22412	0.91	0.625	7.14496e-299	6	VAV3
5.08304e-302	0.512505	0.531	0.158	1.79025e-297	6	FUCA1
8.73564e-302	0.257561	0.251	0.039	3.07669e-297	6	LOC106997223
2.62721e-301	0.408885	0.393	0.089	9.25302e-297	6	PLEKHO1
1.44122e-295	1.26273	0.895	0.629	5.07599e-291	6	MAP4K4
1.90578e-295	0.397639	0.377	0.085	6.71214e-291	6	DOK1
6.84654e-295	1.15853	0.87	0.505	2.41135e-290	6	SSBP2
2.37626e-293	0.320988	0.313	0.061	8.3692e-289	6	VEGFB
2.72756e-292	0.979584	0.652	0.25	9.60646e-288	6	HIF1A
8.52704e-292	0.501834	0.511	0.146	3.00322e-287	6	RCBTB2
3.30738e-291	0.575038	0.537	0.165	1.16486e-286	6	IKBIP
5.03732e-290	0.721626	0.705	0.28	1.77414e-285	6	NAA20
8.57412e-290	0.311314	0.265	0.045	3.0198e-285	6	CMTR2
9.10878e-288	0.796117	0.749	0.317	3.20811e-283	6	ANKS1A
1.92769e-287	0.692851	0.69	0.265	6.78932e-283	6	CEPT1
5.58143e-287	0.385074	0.313	0.064	1.96578e-282	6	LOC106997853
9.63441e-287	0.583556	0.615	0.208	3.39324e-282	6	NFE2L2
2.49851e-285	0.54318	0.549	0.166	8.79975e-281	6	CD2AP
4.50194e-285	0.909769	0.746	0.336	1.58558e-280	6	CEBPB
2.3744e-283	0.280468	0.29	0.054	8.36264e-279	6	SH3TC1
4.70053e-283	0.624684	0.663	0.236	1.65553e-278	6	ERC1
1.56035e-282	0.648942	0.657	0.239	5.49554e-278	6	RRBP1
1.037e-280	0.303349	0.254	0.043	3.65233e-276	6	LOC114672574
7.71471e-279	0.421043	0.496	0.138	2.71712e-274	6	STK3
3.92585e-278	0.421688	0.429	0.112	1.38268e-273	6	CDK2AP1
3.81525e-277	0.579964	0.622	0.215	1.34373e-272	6	HEXA
3.71246e-274	0.876412	0.861	0.474	1.30753e-269	6	SKAP2
1.65772e-273	0.274455	0.287	0.054	5.83848e-269	6	CLSTN3
1.76871e-273	0.707926	0.749	0.312	6.2294e-269	6	NF1
3.59901e-273	0.831214	0.657	0.259	1.26757e-268	6	TRIM24
1.98195e-272	0.368237	0.428	0.109	6.98041e-268	6	MICU3
7.60707e-272	0.556247	0.535	0.167	2.67921e-267	6	DNAJB4
2.32356e-271	0.289303	0.281	0.053	8.18359e-267	6	WDR81
2.22017e-270	0.461346	0.527	0.16	7.81944e-266	6	CD302
8.08273e-270	0.431597	0.325	0.071	2.84674e-265	6	MX1
1.53667e-269	0.627626	0.58	0.195	5.41214e-265	6	CDC14B
2.00339e-268	0.441639	0.46	0.126	7.05593e-264	6	SCARB2
3.82535e-268	0.410133	0.313	0.067	1.34729e-263	6	LOC107000823
2.3288e-266	0.524494	0.525	0.164	8.20202e-262	6	ATP6AP1
2.34185e-266	0.482433	0.47	0.134	8.248e-262	6	CASP7
1.83327e-265	0.871905	0.825	0.48	6.45678e-261	6	C4H6orf62
1.999e-264	0.575887	0.639	0.233	7.04047e-260	6	SH2B3
1.84988e-262	0.499241	0.493	0.147	6.51529e-258	6	KRT10
2.22047e-262	0.647109	0.701	0.278	7.82048e-258	6	SDCCAG8
6.62683e-262	0.784015	0.789	0.381	2.33397e-257	6	LPIN2
4.86868e-260	0.525729	0.349	0.084	1.71475e-255	6	CACNA1A
1.01072e-259	0.492785	0.488	0.145	3.55975e-255	6	TNFRSF1A
3.82953e-259	0.899313	0.847	0.496	1.34876e-254	6	RTN4
9.76267e-259	0.496041	0.544	0.174	3.43841e-254	6	ATP7A
8.72063e-257	0.261125	0.285	0.056	3.07141e-252	6	ABCA3
1.69562e-256	0.898705	0.88	0.582	5.97197e-252	6	DIP2B
3.2498e-256	0.383558	0.425	0.115	1.14458e-251	6	C10H20orf27
1.22894e-255	0.459105	0.529	0.165	4.32833e-251	6	FNIP2
2.71198e-255	0.808528	0.678	0.264	9.5516e-251	6	PHLPP1
3.38568e-255	0.694874	0.722	0.298	1.19244e-250	6	WDFY2
1.19681e-254	0.414876	0.419	0.113	4.21518e-250	6	PRKN
8.19065e-254	0.270785	0.281	0.055	2.88475e-249	6	FAM135A
7.25722e-253	0.558129	0.602	0.214	2.55599e-248	6	SYPL1
5.04799e-252	0.752095	0.728	0.326	1.7779e-247	6	ERICH1
1.56978e-251	0.297663	0.298	0.062	5.52875e-247	6	ADARB1
6.81701e-250	0.502104	0.473	0.143	2.40095e-245	6	TCIRG1
3.67604e-249	0.672835	0.729	0.323	1.2947e-244	6	IKBKB
1.21321e-248	0.332754	0.336	0.077	4.27292e-244	6	DOCK7
4.81788e-248	0.556511	0.555	0.186	1.69686e-243	6	CCDC88A
5.77583e-246	0.396915	0.415	0.112	2.03425e-241	6	ADAM9
1.13612e-244	0.429754	0.303	0.068	4.0014e-240	6	LOC114672064
3.1039e-244	0.318713	0.355	0.087	1.09319e-239	6	CTBS
4.60853e-244	0.279636	0.301	0.065	1.62313e-239	6	MIER2
4.67853e-244	0.96063	0.736	0.363	1.64778e-239	6	PMAIP1
2.83361e-243	0.377578	0.399	0.106	9.97999e-239	6	ACSF2
4.2093e-243	0.815266	0.839	0.516	1.48251e-238	6	CTSS
5.44028e-243	0.503772	0.527	0.171	1.91607e-238	6	MTHFD1L
4.69115e-242	0.515143	0.543	0.185	1.65222e-237	6	INKA1
5.14135e-242	0.706778	0.764	0.35	1.81078e-237	6	PLCG2
2.44057e-240	0.484586	0.533	0.175	8.59568e-236	6	PRNP
3.38774e-237	0.297681	0.296	0.065	1.19316e-232	6	USP46
3.90867e-237	0.85485	0.779	0.405	1.37663e-232	6	IPCEF1
1.23956e-236	0.766256	0.928	0.809	4.36574e-232	6	CAPZB
2.90412e-236	0.276755	0.257	0.05	1.02283e-231	6	ZNF362
1.4753e-234	0.47357	0.496	0.161	5.19602e-230	6	GUSBA
8.76868e-234	0.366318	0.414	0.115	3.08833e-229	6	ABI2
8.82469e-234	0.64979	0.689	0.297	3.10806e-229	6	TRIM38
1.13634e-232	0.329081	0.409	0.113	4.0022e-228	6	GGA2
1.55664e-232	0.355505	0.273	0.058	5.48247e-228	6	MYC
1.61301e-232	0.25573	0.288	0.062	5.68102e-228	6	SLC12A9
3.31968e-232	0.482025	0.548	0.184	1.16919e-227	6	CYSLTR1
3.93504e-232	0.871279	0.912	0.715	1.38592e-227	6	LOC696748
4.25839e-232	0.421919	0.458	0.138	1.49981e-227	6	SEC14L1
4.36408e-232	0.742389	0.793	0.419	1.53703e-227	6	NCKAP1L
4.39061e-232	0.664695	0.732	0.339	1.54637e-227	6	SCAMP2
2.46743e-231	0.714627	0.961	0.92	8.69028e-227	6	SRGN
2.71855e-231	0.334656	0.305	0.071	9.57473e-227	6	MAP3K13
9.56833e-231	0.805315	0.759	0.394	3.36997e-226	6	LOC718777
1.27014e-230	0.590242	0.647	0.258	4.47344e-226	6	HIVEP3
3.29058e-230	0.918179	0.89	0.636	1.15894e-225	6	JUN
2.80638e-229	0.269744	0.264	0.054	9.88408e-225	6	GKAP1
1.89875e-228	0.749814	0.663	0.28	6.68739e-224	6	APPL2
1.73789e-227	0.310932	0.383	0.103	6.12086e-223	6	SLC11A2
2.66615e-227	0.440995	0.418	0.12	9.39018e-223	6	TNFSF8
2.9446e-227	0.618858	0.65	0.272	1.03709e-222	6	ATP6AP2
1.42772e-226	0.564129	0.443	0.136	5.02844e-222	6	DDIT4
5.87232e-226	0.467267	0.494	0.163	2.06823e-221	6	YIPF5
1.39598e-225	0.590887	0.7	0.305	4.91663e-221	6	FEZ2
1.4693e-225	0.288508	0.336	0.083	5.17487e-221	6	ERF
7.03729e-225	0.710139	0.743	0.361	2.47853e-220	6	TSPAN14
6.68363e-223	0.7983	0.822	0.494	2.35398e-218	6	LRCH1
6.7505e-222	0.263943	0.281	0.062	2.37753e-217	6	IRF2BPL
1.02746e-220	0.991422	0.874	0.629	3.61871e-216	6	DUSP1
7.43761e-219	0.575586	0.571	0.218	2.61952e-214	6	ETS2
1.79522e-215	0.472929	0.462	0.147	6.32277e-211	6	SOCS5
3.16006e-215	0.468786	0.535	0.184	1.11297e-210	6	HIPK2
3.40543e-215	0.342914	0.353	0.095	1.19939e-210	6	TMEM94
3.5193e-215	0.750894	0.931	0.821	1.2395e-210	6	MED13L
8.41388e-215	0.498652	0.584	0.222	2.96337e-210	6	TAF1D
1.26001e-214	1.41583	0.805	0.515	4.43775e-210	6	LOC100430627
2.98318e-214	0.446833	0.484	0.161	1.05068e-209	6	FARP2
1.26259e-213	0.354458	0.465	0.147	4.44685e-209	6	SPIN1
7.39214e-213	0.272098	0.271	0.061	2.60351e-208	6	YIF1B
7.43801e-213	0.388071	0.498	0.165	2.61967e-208	6	RNFT1
5.21125e-211	0.78528	0.716	0.355	1.8354e-206	6	PITPNA
5.87343e-211	0.429638	0.446	0.141	2.06862e-206	6	MAFG
7.10254e-211	0.385504	0.448	0.14	2.50152e-206	6	GMFB
8.09418e-211	0.581268	0.693	0.299	2.85077e-206	6	GNPTAB
2.58238e-208	0.479898	0.595	0.224	9.09515e-204	6	KIF16B
2.06993e-207	0.477884	0.675	0.275	7.29031e-203	6	SETBP1
5.21336e-207	0.312751	0.429	0.131	1.83615e-202	6	MFSD11
2.68185e-206	0.380886	0.361	0.101	9.44547e-202	6	MAGI3
4.09297e-205	0.254233	0.251	0.054	1.44154e-200	6	NFKBIE
4.33567e-205	0.372454	0.347	0.095	1.52702e-200	6	MX2
8.1792e-205	0.520378	0.61	0.239	2.88072e-200	6	GALNT10
1.02615e-204	0.507744	0.541	0.199	3.61409e-200	6	MAT2A
2.42209e-204	0.443868	0.553	0.203	8.53061e-200	6	LAMP2
2.26428e-203	0.552555	0.669	0.291	7.97478e-199	6	RGS19
2.28177e-203	0.283072	0.34	0.091	8.0364e-199	6	QSOX1
2.21821e-202	0.749075	0.807	0.455	7.81254e-198	6	BMP2K
3.25236e-202	0.250493	0.37	0.103	1.14548e-197	6	SEMA4A
4.36914e-202	0.555472	0.65	0.269	1.53881e-197	6	ACER3
6.4798e-202	0.332055	0.415	0.127	2.28219e-197	6	HAAO
1.21051e-201	0.47824	0.491	0.17	4.26341e-197	6	IPMK
1.33629e-201	0.275823	0.279	0.066	4.70641e-197	6	ADRB1
1.43708e-201	0.521933	0.476	0.162	5.06141e-197	6	FAM117B
2.29152e-200	0.342635	0.504	0.172	8.07072e-196	6	ZFYVE16
4.32663e-200	0.375374	0.448	0.146	1.52384e-195	6	SLC25A33
6.33923e-200	0.533485	0.62	0.249	2.23268e-195	6	ATG7
5.479e-199	0.303106	0.326	0.086	1.9297e-194	6	IFI44
1.46371e-198	0.367385	0.44	0.141	5.15518e-194	6	SYNGR2
2.91228e-198	0.356802	0.323	0.086	1.02571e-193	6	PRDX4
3.13879e-198	0.326417	0.301	0.076	1.10548e-193	6	GANC
5.85076e-198	0.904122	0.963	0.895	2.06064e-193	6	LOC704104
1.5853e-197	0.36241	0.436	0.138	5.58343e-193	6	LOC703857
2.33692e-196	0.254605	0.284	0.069	8.23063e-192	6	COLGALT1
1.16237e-195	0.346175	0.472	0.157	4.09388e-191	6	STRBP
3.65729e-195	0.559423	0.68	0.304	1.2881e-190	6	DPP7
3.71197e-195	0.34184	0.395	0.119	1.30736e-190	6	STX6
1.40633e-194	0.299779	0.342	0.095	4.95308e-190	6	PSMB5
1.95387e-193	0.382145	0.306	0.082	6.88152e-189	6	HIST1H2BK
3.80684e-193	0.793827	0.894	0.666	1.34077e-188	6	DIAPH2
6.78128e-192	0.381463	0.499	0.177	2.38837e-187	6	AKR1B1
5.37514e-191	0.428734	0.436	0.148	1.89312e-186	6	MGME1
1.00385e-190	0.388028	0.496	0.176	3.53555e-186	6	NAGK
1.84029e-190	0.373825	0.47	0.16	6.48149e-186	6	PEPD
2.82582e-190	0.646756	0.787	0.447	9.95252e-186	6	WSB1
7.31432e-190	0.269712	0.328	0.09	2.57611e-185	6	TNFAIP8L2
4.04377e-189	0.425575	0.569	0.215	1.42421e-184	6	SMURF1
4.41405e-188	0.780514	0.885	0.675	1.55463e-183	6	ZFP36L2
4.00802e-187	0.506755	0.561	0.225	1.41162e-182	6	DR1
1.30925e-186	0.255173	0.263	0.063	4.6112e-182	6	NFKBID
1.35161e-185	0.303901	0.381	0.116	4.76037e-181	6	HSD17B12
1.54366e-185	0.310449	0.418	0.135	5.43677e-181	6	FGL2
1.68732e-185	0.281593	0.284	0.072	5.94273e-181	6	MBD6
1.26733e-184	0.519601	0.639	0.275	4.46355e-180	6	SDCBP
2.97747e-183	0.333871	0.395	0.124	1.04867e-178	6	NADK
4.31414e-183	0.665056	0.941	0.852	1.51944e-178	6	FOXN3
8.86759e-183	0.409459	0.483	0.172	3.12317e-178	6	B3GALNT2
1.03392e-182	0.273674	0.332	0.093	3.64145e-178	6	UHRF1BP1
1.193e-182	0.286443	0.366	0.11	4.20176e-178	6	SLC2A11
3.71765e-182	0.324048	0.37	0.112	1.30935e-177	6	TGIF2
1.2865e-180	1.50237	0.724	0.441	4.53106e-176	6	LOC100426632
2.01692e-180	0.368156	0.333	0.096	7.10359e-176	6	ACSL1
1.45934e-179	0.813038	0.88	0.659	5.13979e-175	6	ITPR2
2.00667e-179	0.334359	0.393	0.125	7.06749e-175	6	ARHGAP27
2.94866e-179	0.778078	0.828	0.533	1.03852e-174	6	FTH1
1.76871e-177	0.895659	0.721	0.384	6.2294e-173	6	HSPH1
2.47747e-177	0.52978	0.449	0.16	8.72566e-173	6	MAMU-DRB5
2.50295e-177	0.461916	0.4	0.132	8.8154e-173	6	PANX1
4.87288e-177	0.735036	0.486	0.192	1.71623e-172	6	CITED2
1.269e-176	0.405466	0.515	0.193	4.46941e-172	6	ADGRG1
2.28706e-176	0.64691	0.791	0.46	8.05503e-172	6	RAC1
3.06018e-176	0.50482	0.642	0.282	1.0778e-171	6	M6PR
6.92708e-175	0.485045	0.704	0.323	2.43972e-170	6	CASK
7.59005e-175	0.593256	0.781	0.409	2.67322e-170	6	GAS7
8.87453e-174	0.358785	0.436	0.15	3.12561e-169	6	BACH1
1.64326e-173	0.413878	0.612	0.253	5.78755e-169	6	RREB1
1.68197e-173	0.314295	0.317	0.089	5.92389e-169	6	LOC106997387
2.294e-173	0.497699	0.574	0.239	8.07947e-169	6	SLC39A10
5.67131e-172	0.607834	0.649	0.301	1.99744e-167	6	JPT1
8.57638e-171	0.553726	0.494	0.199	3.0206e-166	6	NMD3
3.63522e-170	0.692208	0.686	0.34	1.28032e-165	6	HMOX2
4.77695e-170	0.320348	0.424	0.145	1.68244e-165	6	NMRAL1
9.32964e-170	0.322784	0.449	0.157	3.2859e-165	6	TNFSF12
1.20866e-169	0.413918	0.575	0.238	4.25691e-165	6	NIPA2
4.27726e-168	0.311436	0.435	0.147	1.50645e-163	6	ARHGAP6
9.81005e-168	0.550916	0.774	0.398	3.4551e-163	6	ETV6
3.76374e-167	0.564577	0.726	0.358	1.32559e-162	6	ADK
7.08981e-167	0.341048	0.494	0.184	2.49703e-162	6	GATAD1
7.13981e-167	0.412789	0.508	0.198	2.51464e-162	6	FHOD1
3.16114e-165	0.629493	0.922	0.868	1.11335e-160	6	ITM2B
4.15647e-165	0.464884	0.565	0.235	1.46391e-160	6	FLOT1
6.19068e-165	0.259737	0.378	0.123	2.18036e-160	6	PRKACA
3.72641e-164	0.365331	0.406	0.139	1.31244e-159	6	CASS4
5.54768e-164	0.480604	0.653	0.297	1.95389e-159	6	SNX2
1.0812e-163	0.296969	0.324	0.096	3.80797e-159	6	TECPR2
2.19508e-163	0.620969	0.802	0.474	7.73108e-159	6	SH3BGRL
2.46066e-163	0.648655	0.888	0.693	8.66646e-159	6	LAPTM5
3.33423e-163	0.254857	0.303	0.086	1.17431e-158	6	CLCN6
2.57459e-162	0.267705	0.312	0.091	9.0677e-158	6	PQLC1
2.93102e-162	0.508574	0.733	0.37	1.0323e-157	6	NFKBIA
1.93834e-161	0.251207	0.291	0.082	6.82685e-157	6	NUDT8
4.1819e-160	0.575171	0.759	0.417	1.47287e-155	6	CEP170
1.21857e-159	0.259279	0.323	0.097	4.29181e-155	6	LIMK1
7.12312e-159	0.389462	0.54	0.217	2.50876e-154	6	PHTF2
9.12192e-159	0.565558	0.757	0.413	3.21274e-154	6	SUSD6
2.19515e-158	0.279132	0.309	0.091	7.7313e-154	6	TOR3A
9.12913e-156	0.327517	0.411	0.146	3.21528e-151	6	SLC39A1
8.66834e-155	0.395003	0.584	0.251	3.05299e-150	6	APAF1
9.88373e-155	0.704428	0.628	0.297	3.48105e-150	6	MAMU-DRB1
3.10943e-154	0.461065	0.666	0.311	1.09514e-149	6	REEP3
3.24306e-154	0.380332	0.548	0.225	1.14221e-149	6	CARD19
6.6049e-154	0.687995	0.924	0.815	2.32624e-149	6	SSH2
1.32058e-152	0.731534	0.539	0.236	4.6511e-148	6	MDM2
1.1885e-151	0.687188	0.849	0.587	4.18589e-147	6	CD63
2.74042e-151	0.419134	0.404	0.146	9.65176e-147	6	TNF
3.42743e-151	0.414613	0.678	0.325	1.20714e-146	6	LOC100425242
3.0831e-150	0.43814	0.631	0.284	1.08587e-145	6	KDM7A
3.36411e-150	0.342615	0.535	0.22	1.18484e-145	6	GLTP
3.84227e-150	0.437647	0.643	0.292	1.35325e-145	6	D2HGDH
5.48314e-150	0.650675	0.828	0.551	1.93116e-145	6	RAB1A
9.80184e-150	0.292503	0.423	0.151	3.45221e-145	6	TFEB
1.5575e-149	0.326373	0.466	0.178	5.48551e-145	6	RDX
1.72964e-149	0.301904	0.369	0.125	6.09179e-145	6	CDKL3
4.01642e-149	0.25617	0.412	0.145	1.41458e-144	6	SAT2
1.24927e-148	0.299972	0.438	0.163	4.39991e-144	6	PTPN18
4.10625e-148	0.310616	0.388	0.136	1.44622e-143	6	NPC1
9.95027e-148	0.268498	0.277	0.08	3.50448e-143	6	CD80
1.00386e-147	0.714213	0.883	0.68	3.53558e-143	6	MAN1A1
1.16482e-145	0.445386	0.629	0.294	4.10248e-141	6	ARHGAP17
1.5399e-145	0.283984	0.394	0.139	5.42353e-141	6	TMEM106A
5.14765e-145	0.439813	0.429	0.166	1.813e-140	6	DNAJB1
1.79962e-144	0.263948	0.402	0.142	6.33826e-140	6	LOC720035
9.30379e-144	0.250027	0.301	0.092	3.2768e-139	6	DPY19L3
1.88618e-143	0.32396	0.442	0.167	6.64312e-139	6	RTCB
7.49405e-142	0.269787	0.424	0.155	2.6394e-137	6	RALGPS1
1.21885e-141	0.568355	0.787	0.47	4.29278e-137	6	NUDT3
3.78678e-141	0.349028	0.561	0.243	1.3337e-136	6	EPS15L1
1.12195e-140	0.291892	0.487	0.198	3.95151e-136	6	SERTAD2
3.04062e-140	0.319681	0.434	0.165	1.07091e-135	6	RIPK2
6.68663e-140	0.394477	0.61	0.28	2.35503e-135	6	FDX1
1.15068e-139	0.374663	0.629	0.289	4.05268e-135	6	UBE2E1
1.33717e-139	0.693189	0.861	0.642	4.70952e-135	6	ZFP36
1.50766e-139	0.343038	0.53	0.222	5.30999e-135	6	ALPK1
1.66432e-139	0.460816	0.748	0.39	5.86175e-135	6	TMCC1
2.09946e-139	0.650766	0.758	0.439	7.39429e-135	6	RANBP9
2.43563e-139	0.604232	0.862	0.614	8.57829e-135	6	GNAI2
5.3228e-139	0.48301	0.524	0.233	1.87469e-134	6	LOC699110
2.3223e-138	0.29207	0.472	0.187	8.17916e-134	6	HMG20A
4.29534e-138	0.280615	0.376	0.133	1.51282e-133	6	EBPL
9.75056e-138	0.322857	0.48	0.195	3.43415e-133	6	ATF3
3.21038e-137	0.255234	0.368	0.13	1.13069e-132	6	PCYT1A
4.98281e-137	0.355568	0.552	0.237	1.75495e-132	6	LRRC8D
1.27435e-136	0.253318	0.305	0.097	4.48824e-132	6	KDSR
9.00696e-136	0.344272	0.554	0.239	3.17225e-131	6	DTD1
1.35088e-135	0.307848	0.333	0.114	4.7578e-131	6	LOC722294
2.85664e-135	0.585149	0.681	0.359	1.00611e-130	6	B4GALT1
7.18321e-135	0.424956	0.419	0.163	2.52993e-130	6	CD55
3.37602e-134	0.553718	0.667	0.341	1.18903e-129	6	TSC22D2
1.09521e-133	0.718801	0.875	0.689	3.85731e-129	6	GNA13
2.04338e-133	0.272451	0.34	0.117	7.19678e-129	6	EEF2K
2.78752e-133	0.327641	0.401	0.152	9.81765e-129	6	LOC106994057
7.36429e-133	0.304351	0.439	0.172	2.5937e-128	6	MRPS23
1.53434e-132	0.338425	0.407	0.153	5.40394e-128	6	SLC11A1
4.14959e-132	0.591805	0.856	0.658	1.46149e-127	6	SARAF
5.399e-132	0.552289	0.6	0.294	1.90153e-127	6	GADD45B
6.8662e-132	0.444706	0.56	0.253	2.41828e-127	6	DDIT3
1.71144e-131	0.345345	0.466	0.19	6.02768e-127	6	MGAT1
1.9804e-131	0.277798	0.358	0.129	6.97498e-127	6	LOC114680080
1.23697e-130	0.288827	0.527	0.223	4.3566e-126	6	CERS6
1.34587e-130	0.266258	0.452	0.179	4.74016e-126	6	TPP1
3.33166e-130	0.262811	0.351	0.123	1.17341e-125	6	KDM6B
1.72424e-129	0.264068	0.352	0.124	6.07277e-125	6	DNAJC10
2.99113e-129	0.268105	0.521	0.217	1.05348e-124	6	SIL1
1.28602e-128	0.321364	0.38	0.141	4.52935e-124	6	GPAA1
4.55692e-128	0.280245	0.508	0.212	1.60495e-123	6	KANSL1L
1.09739e-127	0.3435	0.557	0.247	3.86502e-123	6	MVB12A
2.56198e-126	0.443758	0.743	0.405	9.0233e-122	6	LOC114673461
4.98766e-126	0.334505	0.554	0.249	1.75665e-121	6	IRF2BP2
5.51423e-126	0.37516	0.665	0.324	1.94211e-121	6	MAP2K1
5.73085e-126	0.615925	0.827	0.574	2.01841e-121	6	GPCPD1
7.11226e-126	0.36858	0.66	0.317	2.50494e-121	6	PRKAG2
7.53255e-126	0.272758	0.402	0.154	2.65296e-121	6	ARID5A
3.01774e-125	0.253719	0.291	0.095	1.06285e-120	6	SPIRE1
1.69667e-124	0.413032	0.623	0.3	5.97569e-120	6	AKR1A1
1.79792e-124	0.339008	0.521	0.228	6.33228e-120	6	SPATS2L
1.11373e-123	0.427652	0.714	0.381	3.92254e-119	6	CAMTA1
1.6816e-123	0.568185	0.784	0.493	5.92261e-119	6	PSMA1
1.81024e-123	0.376087	0.6	0.284	6.37567e-119	6	USP22
2.40941e-123	0.417456	0.605	0.285	8.48596e-119	6	CARD16
2.09672e-122	0.358823	0.693	0.348	7.38466e-118	6	DHRSX
9.40542e-122	0.257251	0.349	0.126	3.31259e-117	6	RRP1
1.23493e-121	0.272488	0.358	0.13	4.34942e-117	6	ZMAT1
1.32903e-121	0.390444	0.762	0.417	4.68086e-117	6	CUX1
1.33305e-121	0.319731	0.496	0.213	4.69498e-117	6	CCDC47
7.23296e-121	0.497265	0.719	0.399	2.54745e-116	6	GAB3
1.06404e-120	0.262643	0.415	0.162	3.74755e-116	6	KIAA1147
6.15392e-120	0.254976	0.481	0.2	2.16741e-115	6	YPEL2
1.01881e-119	0.360888	0.632	0.308	3.58826e-115	6	SPTLC2
1.07517e-119	0.263478	0.386	0.148	3.78674e-115	6	C16H17orf62
1.60823e-119	0.584362	0.737	0.444	5.66417e-115	6	ARRDC3
5.90423e-119	0.349446	0.541	0.246	2.07947e-114	6	ATP6V0D1
2.13001e-118	0.391045	0.62	0.303	7.50191e-114	6	SLC6A6
7.91712e-118	0.534109	0.859	0.642	2.78841e-113	6	VPS13C
4.54834e-117	0.38331	0.79	0.438	1.60193e-112	6	RUNX2
4.67406e-117	0.621366	0.806	0.56	1.6462e-112	6	AIM2
6.10107e-116	0.357884	0.613	0.297	2.1488e-111	6	GALNT2
2.4334e-115	0.440582	0.75	0.422	8.57045e-111	6	DTNBP1
3.86021e-115	0.369454	0.568	0.269	1.35956e-110	6	PRDX1
4.08041e-115	0.330313	0.504	0.223	1.43712e-110	6	DERA
7.05568e-115	0.3999	0.657	0.347	2.48501e-110	6	XBP1
8.13788e-115	0.560503	0.835	0.624	2.86616e-110	6	ARL6IP5
3.39293e-114	0.258698	0.393	0.157	1.19499e-109	6	ATRAID
1.31245e-113	0.376328	0.602	0.294	4.62246e-109	6	EYA3
1.37606e-113	0.356549	0.605	0.3	4.84648e-109	6	SEL1L
2.06916e-113	0.280774	0.425	0.178	7.28758e-109	6	TOP1MT
3.70665e-113	0.521258	0.79	0.516	1.30548e-108	6	TMBIM6
5.10163e-113	0.353211	0.667	0.335	1.79679e-108	6	SLC38A9
8.70548e-113	0.289625	0.573	0.267	3.06607e-108	6	SGPL1
2.60289e-112	0.257188	0.454	0.191	9.16739e-108	6	COMMD3
4.32989e-112	0.32506	0.673	0.343	1.52499e-107	6	DIP2A
2.57006e-111	0.495674	0.865	0.655	9.05176e-107	6	WASF2
2.96251e-111	0.303288	0.53	0.243	1.0434e-106	6	HSBP1
5.44751e-111	0.386967	0.581	0.28	1.91861e-106	6	PSENEN
2.44409e-110	0.41397	0.632	0.324	8.6081e-106	6	NUMA1
5.08699e-110	0.269363	0.472	0.205	1.79164e-105	6	SLC7A6
5.55145e-110	0.353301	0.628	0.313	1.95522e-105	6	GALNT7
9.63607e-110	0.2999	0.499	0.221	3.39382e-105	6	LOC106997895
1.31978e-109	0.336645	0.49	0.218	4.64825e-105	6	SOAT1
4.54521e-109	0.272317	0.435	0.183	1.60082e-104	6	TMEM107
1.0317e-108	0.275026	0.484	0.215	3.63365e-104	6	P2RX4
1.32527e-108	0.294451	0.64	0.318	4.66759e-104	6	UBE2W
3.31455e-108	0.498548	0.721	0.404	1.16739e-103	6	LOC694064
8.83322e-108	0.262526	0.407	0.168	3.11106e-103	6	RAB24
1.33962e-107	0.353944	0.629	0.313	4.71814e-103	6	PANK2
2.80908e-107	0.388597	0.667	0.354	9.89358e-103	6	PLD3
3.52432e-107	0.439139	0.754	0.455	1.24126e-102	6	DNM2
3.5515e-107	0.280781	0.55	0.258	1.25084e-102	6	LENG8
4.40614e-107	0.251628	0.268	0.093	1.55184e-102	6	LOC701574
5.03899e-107	0.397269	0.598	0.3	1.77473e-102	6	P4HA1
5.60109e-107	0.266405	0.534	0.244	1.9727e-102	6	MTMR14
1.1374e-106	0.368425	0.61	0.305	4.00594e-102	6	B3GLCT
6.17804e-106	0.396261	0.664	0.345	2.17591e-101	6	RNASEH2B
8.53865e-106	0.269232	0.547	0.256	3.00731e-101	6	TET3
1.18547e-105	0.254564	0.379	0.153	4.17522e-101	6	TMEM127
3.34264e-105	0.296127	0.542	0.257	1.17728e-100	6	ABHD18
4.74428e-105	0.540964	0.921	0.833	1.67093e-100	6	JMJD1C
2.64498e-104	0.427579	0.783	0.499	9.3156e-100	6	ARL6IP1
5.82575e-104	0.29545	0.477	0.213	2.05183e-99	6	RNF138
5.98563e-104	0.36665	0.692	0.377	2.10814e-99	6	ATF6
8.06393e-104	0.394475	0.536	0.261	2.84012e-99	6	ATP13A3
2.12591e-103	0.534799	0.846	0.628	7.48746e-99	6	CD46
3.92139e-103	0.313392	0.581	0.285	1.38111e-98	6	N4BP2L1
7.73687e-103	0.3081	0.612	0.304	2.72492e-98	6	FKBP15
1.5713e-102	0.258035	0.342	0.134	5.53413e-98	6	ACAA2
2.19741e-102	0.322501	0.583	0.286	7.73927e-98	6	RPS19BP1
3.53543e-102	0.361979	0.64	0.333	1.24518e-97	6	FOXO3
4.29705e-102	0.441217	0.848	0.61	1.51342e-97	6	GRB2
5.16796e-102	0.415342	0.69	0.376	1.82016e-97	6	FNDC3B
6.56623e-102	0.422698	0.74	0.432	2.31262e-97	6	NUMB
2.18283e-101	0.264494	0.382	0.155	7.68794e-97	6	CARS
5.73527e-101	0.457808	0.764	0.465	2.01996e-96	6	EPSTI1
6.7106e-101	0.423708	0.721	0.422	2.36347e-96	6	METTL9
7.45771e-101	0.285188	0.617	0.31	2.62661e-96	6	PTPN6
1.74833e-100	0.558883	0.847	0.557	6.15762e-96	6	KLF2
7.94432e-100	0.425984	0.759	0.45	2.79799e-95	6	CLTA
9.22009e-100	0.361776	0.709	0.401	3.24732e-95	6	NRROS
1.32102e-99	0.564092	0.925	0.863	4.65262e-95	6	PICALM
6.79649e-99	0.444101	0.791	0.534	2.39372e-94	6	MOB1A
1.39332e-98	0.478474	0.883	0.686	4.90727e-94	6	CAMK1D
2.25181e-98	0.468616	0.832	0.604	7.93088e-94	6	CD37
3.34914e-98	0.416702	0.715	0.423	1.17957e-93	6	LOC107000013
6.59356e-98	0.31342	0.547	0.262	2.32225e-93	6	KDELR1
2.88753e-96	0.292086	0.615	0.312	1.01699e-91	6	ATP11A
6.29814e-96	0.4033	0.733	0.417	2.2182e-91	6	ADORA2B
1.33958e-95	0.290088	0.74	0.427	4.71802e-91	6	WWOX
1.45679e-95	0.38153	0.753	0.455	5.13081e-91	6	CHD9
2.80564e-95	0.265143	0.525	0.251	9.88147e-91	6	USF2
3.26331e-95	0.264605	0.596	0.296	1.14934e-90	6	VPS39
6.84568e-95	0.333916	0.619	0.32	2.41105e-90	6	RASA3
1.01738e-94	0.309355	0.458	0.213	3.58321e-90	6	MLEC
1.05396e-94	0.268871	0.373	0.156	3.71205e-90	6	TMEM35B
3.73481e-94	0.443784	0.721	0.422	1.3154e-89	6	ARL5A
8.02395e-94	0.289021	0.682	0.369	2.82604e-89	6	USP32
1.97011e-93	0.482712	0.868	0.714	6.93873e-89	6	CD53
1.1051e-92	0.401459	0.744	0.429	3.89215e-88	6	PYCARD
3.27072e-92	0.299718	0.671	0.363	1.15195e-87	6	WASHC4
4.61565e-92	0.603395	0.692	0.429	1.62563e-87	6	IFI6
6.87735e-92	0.277887	0.629	0.325	2.4222e-87	6	ME2
3.35968e-91	0.414713	0.663	0.378	1.18328e-86	6	RALGAPA2
6.04036e-91	0.402852	0.794	0.526	2.12741e-86	6	GTF2I
1.36225e-90	0.255453	0.523	0.25	4.79783e-86	6	GRAMD1A
1.62869e-90	0.317002	0.538	0.265	5.73626e-86	6	SIPA1
1.76227e-90	0.333104	0.581	0.3	6.20671e-86	6	LAPTM4A
2.45219e-90	0.268361	0.462	0.213	8.63661e-86	6	MTCH1
7.41998e-90	0.262429	0.529	0.257	2.61332e-85	6	DBNL
1.10161e-89	0.431391	0.779	0.509	3.87989e-85	6	JUNB
4.39645e-89	0.493882	0.864	0.675	1.54843e-84	6	PIK3R1
2.3285e-88	0.305671	0.534	0.27	8.20098e-84	6	SKI
4.57873e-88	0.377533	0.641	0.353	1.61263e-83	6	ANXA5
6.51598e-88	0.281445	0.612	0.319	2.29493e-83	6	DOP1A
1.50735e-87	0.267652	0.376	0.164	5.3089e-83	6	LOC106994055
2.542e-87	0.501087	0.782	0.531	8.95293e-83	6	ARF4
3.10156e-87	0.269581	0.321	0.134	1.09237e-82	6	POLG2
5.03408e-87	0.49817	0.92	0.846	1.773e-82	6	KLF6
8.95515e-87	0.315281	0.663	0.363	3.15401e-82	6	CBL
9.26461e-87	0.263679	0.356	0.152	3.263e-82	6	BCL6
2.73869e-86	0.505813	0.699	0.443	9.64567e-82	6	PDE4D
2.77289e-86	0.280311	0.628	0.335	9.76613e-82	6	ADCY7
9.2733e-86	0.36118	0.507	0.256	3.26606e-81	6	RNF19B
1.35787e-85	0.280982	0.613	0.326	4.78243e-81	6	MAP3K3
6.15253e-85	0.264831	0.46	0.218	2.16692e-80	6	PTPRE
1.68401e-84	0.304972	0.656	0.363	5.93108e-80	6	RHOG
9.87873e-84	0.467051	0.819	0.615	3.47929e-79	6	GABARAP
1.30819e-83	0.40592	0.868	0.67	4.60744e-79	6	EIF4G3
1.84869e-83	0.276067	0.538	0.277	6.51108e-79	6	C2CD5
2.02225e-83	0.319743	0.684	0.385	7.12236e-79	6	WBP1L
3.48708e-82	0.438606	0.825	0.578	1.22815e-77	6	AFF1
1.90948e-81	0.375644	0.762	0.504	6.72519e-77	6	FOS
9.30342e-81	0.274007	0.55	0.284	3.27666e-76	6	SLC3A2
9.63634e-81	0.363466	0.745	0.451	3.39392e-76	6	EIF4A1
2.30735e-80	0.338448	0.722	0.418	8.12649e-76	6	LRMP
2.74641e-80	0.277367	0.591	0.311	9.67284e-76	6	LAP3
4.07937e-80	0.305376	0.657	0.363	1.43675e-75	6	TET2
8.56862e-80	0.263538	0.641	0.351	3.01787e-75	6	SNX1
9.81956e-80	0.357059	0.677	0.403	3.45845e-75	6	ATF4
2.66174e-79	0.322209	0.578	0.312	9.37466e-75	6	CORO7
3.38687e-79	0.259621	0.554	0.283	1.19285e-74	6	ADAM17
4.22342e-79	0.561872	0.777	0.539	1.48749e-74	6	TUT7
1.13921e-78	0.3702	0.834	0.594	4.0123e-74	6	RCSD1
1.568e-78	0.250805	0.525	0.266	5.52249e-74	6	ATXN2L
3.37852e-78	0.40423	0.811	0.583	1.18991e-73	6	TRIM22
3.9079e-78	0.405082	0.872	0.658	1.37636e-73	6	RERE
6.48927e-78	0.346341	0.665	0.389	2.28552e-73	6	PKN1
1.72434e-77	0.303541	0.707	0.416	6.07314e-73	6	RPS6KA1
1.10122e-76	0.349861	0.689	0.405	3.87851e-72	6	LAMP1
2.28376e-76	0.354833	0.759	0.482	8.04339e-72	6	TAB2
4.596e-76	0.553256	0.579	0.335	1.61871e-71	6	PLEK
5.79793e-76	0.336281	0.679	0.407	2.04203e-71	6	LAMTOR4
1.40783e-75	0.4026	0.797	0.551	4.95838e-71	6	SP110
2.71801e-75	0.252066	0.496	0.252	9.57282e-71	6	TLE3
3.85595e-75	0.26983	0.484	0.245	1.35807e-70	6	DYNC1LI1
5.35198e-75	0.282887	0.402	0.197	1.88497e-70	6	LOC705327
1.19412e-74	0.3508	0.957	0.956	4.20569e-70	6	LOC707383
8.00628e-73	0.272179	0.674	0.392	2.81981e-68	6	ROCK2
3.50555e-72	0.303456	0.65	0.372	1.23465e-67	6	LOC706619
7.61786e-72	0.295704	0.481	0.237	2.68301e-67	6	CRIM1
1.81017e-71	0.320088	0.637	0.363	6.37542e-67	6	LOC106999151
7.78469e-71	0.469281	0.832	0.659	2.74177e-66	6	DDX3X
3.45868e-70	0.259848	0.533	0.279	1.21815e-65	6	STX12
1.15958e-69	0.361764	0.709	0.448	4.08403e-65	6	FAM53B
3.45517e-69	0.354996	0.737	0.47	1.21691e-64	6	ATP6V0C
5.67494e-68	0.290907	0.596	0.333	1.99871e-63	6	TMED9
9.31648e-68	0.276421	0.643	0.372	3.28126e-63	6	MXD4
4.19928e-67	0.294668	0.664	0.383	1.47899e-62	6	MDH1
1.49277e-66	0.30591	0.685	0.41	5.25754e-62	6	ARHGAP12
1.58967e-66	0.388539	0.88	0.736	5.59883e-62	6	ARGLU1
2.57569e-66	0.375909	0.617	0.376	9.07159e-62	6	ZSWIM4
5.30768e-66	0.304546	0.773	0.51	1.86936e-61	6	NKTR
1.28393e-64	0.303764	0.811	0.568	4.52199e-60	6	FOSB
4.38264e-64	0.297365	0.674	0.408	1.54357e-59	6	ABHD12
5.73881e-64	0.372229	0.842	0.653	2.02121e-59	6	CALM2
2.17789e-63	0.29404	0.832	0.594	7.67053e-59	6	TUBA1B
3.48869e-63	0.315497	0.711	0.448	1.22872e-58	6	CREM
2.55391e-62	0.278738	0.577	0.332	8.99488e-58	6	RASGEF1B
7.74774e-62	0.350684	0.762	0.513	2.72875e-57	6	RNASEK
2.82162e-60	0.252341	0.728	0.462	9.93774e-56	6	NCK2
4.65387e-59	0.292217	0.765	0.51	1.63909e-54	6	CAPZA2
1.1049e-57	0.263756	0.647	0.383	3.89146e-53	6	GALNT1
9.5949e-57	0.264265	0.698	0.432	3.37932e-52	6	MYDGF
1.84237e-55	0.257797	0.574	0.332	6.48883e-51	6	MYLIP
1.18821e-54	0.311532	0.819	0.612	4.18487e-50	6	UVRAG
5.1341e-54	0.350282	0.714	0.468	1.80823e-49	6	PPP3R1
7.69519e-54	0.256871	0.254	0.12	2.71025e-49	6	PLEKHG2
1.20951e-53	0.283627	0.606	0.368	4.2599e-49	6	ODC1
1.23038e-53	0.344469	0.794	0.572	4.3334e-49	6	HSP90B1
1.2869e-52	0.33729	0.861	0.673	4.53245e-48	6	TNFRSF1B
1.23987e-51	0.297876	0.802	0.584	4.36682e-47	6	AFF4
2.50101e-51	0.283793	0.693	0.439	8.80857e-47	6	IL10RA
8.03581e-51	0.323435	0.766	0.534	2.83021e-46	6	CMTM6
2.30983e-50	0.342523	0.848	0.651	8.13521e-46	6	SLC4A7
5.7374e-50	0.274005	0.751	0.504	2.02071e-45	6	USP24
3.48529e-47	0.273044	0.772	0.548	1.22752e-42	6	FAM49B
4.35266e-45	0.287945	0.778	0.556	1.53301e-40	6	GABARAPL2
1.0784e-44	0.289304	0.856	0.683	3.79811e-40	6	MTDH
1.04822e-42	0.288891	0.873	0.726	3.69184e-38	6	PNISR
1.22447e-42	0.272298	0.818	0.623	4.31258e-38	6	ATP6V0E1
5.2114e-40	0.297599	0.853	0.716	1.83545e-35	6	EPS15
1.78883e-39	0.288478	0.814	0.636	6.30026e-35	6	TMBIM4
1.28185e-37	0.273952	0.753	0.54	4.51467e-33	6	DNAJA1
1.86262e-37	0.263347	0.887	0.752	6.56016e-33	6	TCF12
1.41853e-36	0.263339	0.716	0.49	4.99607e-32	6	FAM126A
3.64399e-32	0.257822	0.834	0.689	1.28341e-27	6	CCNL1
1.56511e-31	0.265695	0.804	0.625	5.51232e-27	6	ABI1

## Sheet: Cluster 7
p_val	avg_log2FC	pct.1	pct.2	p_val_adj	cluster	gene
0	1.76649	0.504	0.104	0	7	RPS6KA2
0	1.68413	0.344	0.026	0	7	LDB2
0	1.63204	0.749	0.169	0	7	KLRC3
0	1.59013	0.597	0.131	0	7	SYK
0	1.5401	0.817	0.318	0	7	TXK
0	1.26284	0.311	0.034	0	7	PRKD1
0	1.16129	0.315	0.032	0	7	BANK1
0	0.691183	0.279	0.033	0	7	CCNJL
7.02037e-299	1.21364	0.528	0.122	2.47257e-294	7	KLRC2
2.05038e-286	1.29531	0.365	0.064	7.22143e-282	7	ITGAD
2.27395e-267	1.36202	0.578	0.175	8.00884e-263	7	AOAH
2.98496e-242	2.11517	0.515	0.153	1.0513e-237	7	SLC24A3
1.5651e-209	1.15507	0.419	0.111	5.51229e-205	7	KLRC1
4.25545e-202	1.22808	0.512	0.159	1.49877e-197	7	FCER1G
4.17622e-195	0.892014	0.511	0.151	1.47087e-190	7	LOC711031
9.80179e-184	1.39913	0.66	0.277	3.45219e-179	7	TYROBP
2.58452e-183	1.46958	0.732	0.355	9.10269e-179	7	KLRB1
2.45962e-172	1.11688	0.778	0.443	8.66278e-168	7	RIN3
6.23876e-171	1.22717	0.69	0.364	2.19729e-166	7	PLCG2
7.39133e-171	1.0448	0.991	0.95	2.60323e-166	7	PITPNC1
6.28688e-163	0.957992	0.351	0.091	2.21424e-158	7	ZBTB16
1.7985e-149	1.14925	0.494	0.192	6.3343e-145	7	ATP8B4
1.63962e-147	1.25559	0.63	0.285	5.77474e-143	7	PLCB1
7.68736e-145	1.06118	0.924	0.828	2.70749e-140	7	CD247
1.12018e-143	1.06697	0.521	0.213	3.94527e-139	7	CD7
2.05621e-140	1.43481	0.7	0.368	7.24198e-136	7	MYO1E
3.18239e-139	0.925244	0.416	0.142	1.12084e-134	7	LOC100423131
1.76161e-138	1.39097	0.267	0.065	6.2044e-134	7	AFF3
1.08522e-137	0.882242	0.506	0.216	3.82215e-133	7	IL2RB
5.45529e-124	1.19971	0.467	0.183	1.92135e-119	7	KCNQ5
1.2397e-117	1.5047	0.47	0.199	4.36624e-113	7	PDGFD
4.67543e-114	1.02394	0.555	0.266	1.64669e-109	7	CD38
4.01628e-113	0.902568	0.552	0.246	1.41453e-108	7	PRSS57
3.55082e-110	1.0505	0.4	0.15	1.2506e-105	7	CLNK
1.12512e-106	1.19898	0.26	0.073	3.96268e-102	7	NCAM1
1.7589e-105	0.711756	0.423	0.17	6.19485e-101	7	LAT2
4.08171e-101	0.90459	0.492	0.208	1.43758e-96	7	ANK3
4.27973e-99	0.467471	0.258	0.076	1.50732e-94	7	FGR
6.44507e-99	0.792203	0.584	0.31	2.26995e-94	7	CD244
1.32975e-97	1.10598	0.57	0.305	4.68337e-93	7	IL12RB2
1.60751e-97	1.21325	0.854	0.673	5.66164e-93	7	GNLY
2.11636e-94	0.879837	0.507	0.245	7.45383e-90	7	LYN
2.18978e-81	0.719628	0.886	0.768	7.71241e-77	7	PTPN22
1.38442e-78	0.644436	0.964	0.894	4.87593e-74	7	CBLB
3.30023e-78	0.642769	0.316	0.124	1.16234e-73	7	ITGAX
1.48537e-76	0.793208	0.735	0.541	5.23148e-72	7	SLA2
2.60546e-76	0.766029	0.663	0.435	9.17644e-72	7	MCTP2
7.43121e-74	0.537543	0.311	0.123	2.61727e-69	7	MICU3
1.89801e-73	0.794565	0.451	0.234	6.68479e-69	7	CERS6
6.6167e-72	0.592559	0.94	0.861	2.3304e-67	7	UTRN
3.51551e-71	0.791952	0.654	0.388	1.23816e-66	7	IKZF2
3.92771e-66	0.749349	0.702	0.528	1.38334e-61	7	SAMHD1
5.3502e-64	0.719196	0.816	0.636	1.88434e-59	7	VAV3
1.17828e-62	0.878802	0.739	0.549	4.14991e-58	7	MAML2
5.2027e-61	0.709199	0.411	0.209	1.83239e-56	7	SBF2
2.0772e-60	0.714686	0.775	0.624	7.3159e-56	7	LOC106992273
1.63277e-59	0.942477	0.289	0.126	5.7506e-55	7	PRKN
8.75217e-59	0.607162	0.265	0.108	3.08252e-54	7	TTC28
5.38287e-57	0.516235	0.944	0.889	1.89585e-52	7	JAK1
2.10003e-56	0.759471	0.588	0.373	7.39629e-52	7	AKT3
1.16399e-54	0.63785	0.488	0.3	4.09958e-50	7	PTPN12
1.17222e-51	0.509931	0.912	0.862	4.12855e-47	7	PIP4K2A
2.85548e-51	0.707388	0.849	0.772	1.0057e-46	7	TOX
1.21331e-50	1.04293	0.699	0.562	4.27329e-46	7	UBASH3B
1.51153e-50	0.576145	0.96	0.923	5.32362e-46	7	PRKCH
6.53863e-50	0.634096	0.35	0.187	2.30291e-45	7	TOP1MT
1.17214e-47	0.841901	0.312	0.154	4.12826e-43	7	NCALD
4.34034e-47	0.471131	0.968	0.937	1.52867e-42	7	KEG06-p12
8.30925e-47	0.553559	0.955	0.915	2.92652e-42	7	KLF12
1.06435e-46	0.508393	0.852	0.745	3.74863e-42	7	MACF1
2.00595e-46	0.60237	0.351	0.186	7.06497e-42	7	MAP3K8
8.15926e-46	0.448717	0.288	0.136	2.87369e-41	7	TEC
1.56598e-45	0.769469	0.594	0.436	5.51538e-41	7	CD96
5.45998e-45	0.497687	0.901	0.866	1.92301e-40	7	DOCK2
3.09374e-44	0.422092	0.297	0.14	1.08962e-39	7	SEL1L3
1.01619e-43	0.417524	0.313	0.15	3.57903e-39	7	ANKRD6
1.46893e-43	0.614617	0.815	0.678	5.17358e-39	7	SNTB1
1.47737e-42	0.489084	0.842	0.756	5.2033e-38	7	ZNF609
6.52831e-42	0.623791	0.609	0.44	2.29927e-37	7	HIP1
6.34737e-41	0.421434	0.317	0.161	2.23554e-36	7	TCF7
2.07192e-40	0.406488	0.918	0.866	7.2973e-36	7	TNRC6B
2.32123e-39	0.55502	0.891	0.819	8.17536e-35	7	SSH2
1.23538e-38	0.498483	0.71	0.605	4.35102e-34	7	RCSD1
3.32494e-36	0.427691	0.845	0.785	1.17104e-31	7	ITCH
5.31587e-36	0.716749	0.654	0.517	1.87225e-31	7	HEG1
1.6292e-35	0.425269	0.524	0.339	5.73804e-31	7	NRIP1
7.95481e-35	0.423236	0.291	0.154	2.80169e-30	7	GPR65
2.09603e-33	0.922918	0.543	0.411	7.38223e-29	7	BTBD11
2.95169e-33	0.612063	0.618	0.487	1.03959e-28	7	JARID2
6.12398e-33	0.400786	0.862	0.804	2.15687e-28	7	DOCK10
1.94744e-32	0.557082	0.498	0.356	6.85888e-28	7	KLRF1
2.45964e-32	0.534657	0.443	0.306	8.66283e-28	7	ITPR1
4.81863e-32	0.67832	0.69	0.582	1.69712e-27	7	ZHX2
6.43179e-32	0.530741	0.44	0.285	2.26528e-27	7	PHLPP1
1.09179e-31	0.430408	0.902	0.843	3.84527e-27	7	SCML4
1.68301e-31	0.936953	0.396	0.271	5.92757e-27	7	CMC1
1.9934e-31	0.433782	0.983	0.983	7.02075e-27	7	KEG06-p07
8.69682e-31	0.590726	0.501	0.368	3.06302e-26	7	ABCC1
1.27305e-30	0.432364	0.77	0.668	4.4837e-26	7	RERE
4.73035e-30	0.461171	0.389	0.252	1.66603e-25	7	TRIM44
6.86642e-30	0.513758	0.833	0.781	2.41835e-25	7	STK39
8.30693e-30	0.3924	0.905	0.856	2.9257e-25	7	PREX1
1.27659e-29	0.597485	0.464	0.313	4.49615e-25	7	MYO1D
1.46451e-29	0.657082	0.867	0.784	5.15799e-25	7	BABAM2
2.0094e-29	0.485182	0.403	0.27	7.0771e-25	7	HPCAL1
2.28155e-29	0.297609	0.975	0.954	8.03562e-25	7	SKAP1
2.80678e-29	0.435302	0.847	0.78	9.88549e-25	7	ARAP2
3.48609e-29	0.451907	0.436	0.3	1.2278e-24	7	RGS3
5.69617e-29	0.497281	0.75	0.667	2.00619e-24	7	STIM1
7.00092e-29	0.402048	0.897	0.851	2.46572e-24	7	PRKCB
1.966e-28	0.425143	0.763	0.687	6.92426e-24	7	LNPEP
2.44909e-28	0.571226	0.831	0.784	8.62571e-24	7	ADGRE5
2.65686e-28	0.611938	0.492	0.355	9.35747e-24	7	FAM102B
3.20122e-28	0.443476	0.306	0.183	1.12747e-23	7	NOL4L
4.85856e-28	0.465626	0.717	0.634	1.71118e-23	7	ATM
5.57469e-28	0.394671	0.399	0.263	1.9634e-23	7	MATK
5.85996e-28	0.422735	0.848	0.777	2.06388e-23	7	NFATC3
1.37664e-27	0.351571	0.374	0.244	4.84852e-23	7	ARHGAP9
3.18378e-27	0.388696	0.962	0.929	1.12133e-22	7	KEG06-p13
6.33945e-27	0.337162	0.95	0.922	2.23275e-22	7	RABGAP1L
7.56537e-27	0.356989	0.876	0.822	2.66452e-22	7	INPP5D
9.60384e-27	0.443759	0.88	0.838	3.38247e-22	7	INPP4A
1.84371e-26	0.338936	0.958	0.927	6.49355e-22	7	CELF2
7.51634e-26	0.370959	0.355	0.232	2.64725e-21	7	PNPLA7
1.06609e-25	0.477348	0.883	0.835	3.75477e-21	7	SYTL3
2.31183e-25	0.377978	0.801	0.718	8.14226e-21	7	LPP
2.66246e-25	0.601998	0.594	0.489	9.37719e-21	7	ITPKB
3.27106e-25	0.448588	0.64	0.53	1.15207e-20	7	PPP1R16B
3.36745e-25	0.263866	0.279	0.157	1.18602e-20	7	ITM2C
4.54753e-25	0.273869	0.974	0.961	1.60164e-20	7	ANKRD44
7.643e-25	0.659914	0.725	0.676	2.69187e-20	7	CCL5
1.78385e-24	0.3974	0.755	0.699	6.28274e-20	7	MAPK1
2.41895e-24	0.374413	0.832	0.793	8.51956e-20	7	ASH1L
4.86768e-24	0.463793	0.614	0.488	1.7144e-19	7	TPD52
6.29675e-24	0.413501	0.694	0.617	2.21772e-19	7	IKZF3
9.94318e-24	0.458081	0.645	0.559	3.50199e-19	7	ATP8A1
1.18981e-23	0.471765	0.752	0.681	4.19051e-19	7	CMIP
1.69094e-23	0.417608	0.475	0.352	5.95549e-19	7	KIAA1671
3.29229e-23	0.420869	0.757	0.688	1.15954e-18	7	KAT6B
3.32852e-23	0.465214	0.596	0.499	1.17231e-18	7	ELF2
3.67639e-23	0.432404	0.302	0.19	1.29482e-18	7	MTHFD1L
5.03396e-23	0.470591	0.648	0.557	1.77296e-18	7	RPS6KC1
5.61372e-23	0.373988	0.762	0.702	1.97715e-18	7	PRRC2B
6.5053e-23	0.329177	0.871	0.834	2.29117e-18	7	LRBA
7.03958e-23	0.393632	0.543	0.425	2.47934e-18	7	IPCEF1
9.51645e-23	0.600335	0.482	0.368	3.3517e-18	7	CTSW
1.16302e-22	0.388968	0.377	0.257	4.09615e-18	7	ERMP1
1.61114e-22	0.569958	0.761	0.68	5.67443e-18	7	RGS9
2.03137e-22	0.2971	0.708	0.545	7.15449e-18	7	KLRD1
2.46805e-22	0.26942	0.916	0.867	8.69248e-18	7	PARP8
4.38378e-22	0.387564	0.64	0.538	1.54397e-17	7	TNRC6C
9.48444e-22	0.378276	0.478	0.36	3.34042e-17	7	PTK2B
1.09324e-21	0.343747	0.384	0.257	3.8504e-17	7	ZNF618
1.18209e-21	0.503752	0.536	0.428	4.16331e-17	7	SCFD2
1.19316e-21	0.34532	0.764	0.677	4.2023e-17	7	NKG2D
1.53711e-21	0.433882	0.553	0.43	5.41369e-17	7	ADCY9
2.16925e-21	0.40534	0.703	0.611	7.64009e-17	7	SGMS1
2.39689e-21	0.3897	0.669	0.557	8.44184e-17	7	EHBP1
2.97296e-21	0.328464	0.915	0.886	1.04708e-16	7	VPS13B
3.03064e-21	0.355084	0.817	0.77	1.06739e-16	7	CNOT6L
3.77551e-21	0.294944	0.877	0.852	1.32973e-16	7	DOCK8
1.0313e-20	0.397056	0.667	0.566	3.63222e-16	7	RRAS2
1.05932e-20	0.475494	0.54	0.436	3.73093e-16	7	CUX1
1.06353e-20	0.288165	0.871	0.82	3.74574e-16	7	USP34
1.78546e-20	0.480177	0.974	0.973	6.28837e-16	7	KEG06-p10
8.91714e-20	0.361717	0.847	0.811	3.14062e-15	7	CCND3
9.6707e-20	0.315497	0.726	0.649	3.40602e-15	7	RAPGEF6
1.48408e-19	0.355368	0.283	0.183	5.22692e-15	7	GSN
1.56531e-19	0.312537	0.816	0.768	5.51302e-15	7	MGAT5
2.39383e-19	0.582313	0.359	0.247	8.43106e-15	7	MTSS1
3.4462e-19	0.299385	0.867	0.819	1.21375e-14	7	ARID1B
3.92092e-19	0.382841	0.447	0.342	1.38095e-14	7	NSMAF
5.02909e-19	0.469417	0.66	0.582	1.77124e-14	7	MLLT3
5.78671e-19	0.395479	0.547	0.455	2.03808e-14	7	GAK
7.90409e-19	0.422386	0.575	0.492	2.78382e-14	7	KIF13B
8.5804e-19	0.350029	0.747	0.675	3.02202e-14	7	NSD1
8.82092e-19	0.369283	0.386	0.271	3.10673e-14	7	VWA8
8.85892e-19	0.429148	0.619	0.529	3.12011e-14	7	MBD5
1.34477e-18	0.328766	0.297	0.199	4.73629e-14	7	UBXN2B
1.58306e-18	0.309729	0.656	0.572	5.57553e-14	7	SYNRG
1.75781e-18	0.364136	0.406	0.303	6.19101e-14	7	SIK1
2.2398e-18	0.368507	0.786	0.727	7.88857e-14	7	EXOC4
2.53782e-18	0.340359	0.864	0.815	8.93819e-14	7	ZFAND3
2.58061e-18	0.357715	0.738	0.69	9.0889e-14	7	CCDC88C
2.95109e-18	0.442734	0.364	0.25	1.03937e-13	7	HDAC9
3.19475e-18	0.288535	0.844	0.8	1.12519e-13	7	FAM172A
3.28442e-18	0.380534	0.391	0.272	1.15677e-13	7	NR3C2
3.63455e-18	0.461189	0.913	0.888	1.28009e-13	7	KEG06-p08
3.73672e-18	0.303601	0.753	0.697	1.31607e-13	7	KDM4C
3.78625e-18	0.341683	0.761	0.69	1.33352e-13	7	MAN1A1
4.06362e-18	0.349331	0.404	0.303	1.43121e-13	7	GSE1
4.86063e-18	0.39595	0.587	0.499	1.71191e-13	7	SLC12A6
6.34804e-18	0.317391	0.712	0.66	2.23578e-13	7	USP47
6.57192e-18	0.372452	0.623	0.544	2.31463e-13	7	PRKACB
1.69684e-17	0.351161	0.759	0.717	5.97626e-13	7	PACS1
1.93795e-17	0.3401	0.736	0.66	6.82546e-13	7	BBX
2.19589e-17	0.445542	0.441	0.346	7.73392e-13	7	FOCAD
3.39858e-17	0.326407	0.655	0.592	1.19698e-12	7	AFF1
3.51297e-17	0.549036	0.269	0.179	1.23727e-12	7	PDE8A
3.91516e-17	0.313067	0.851	0.813	1.37892e-12	7	NCOA2
5.80924e-17	0.322284	0.803	0.751	2.04602e-12	7	EPB41
6.63423e-17	0.350266	0.671	0.597	2.33657e-12	7	ATAD2B
7.62088e-17	0.661938	0.512	0.419	2.68408e-12	7	APBB2
9.12931e-17	0.301599	0.598	0.505	3.21534e-12	7	SNX14
1.12986e-16	0.313813	0.421	0.312	3.97937e-12	7	MPZL3
1.28917e-16	0.301355	0.784	0.731	4.54045e-12	7	SETD2
2.31547e-16	0.387938	0.379	0.288	8.15509e-12	7	KDM4B
3.46911e-16	0.303353	0.832	0.794	1.22182e-11	7	KMT2E
4.09299e-16	0.479507	0.535	0.457	1.44155e-11	7	JMY
4.63547e-16	0.358968	0.855	0.815	1.63261e-11	7	FOXP1
4.71576e-16	0.351712	0.552	0.462	1.66089e-11	7	CDYL
4.84754e-16	0.32669	0.53	0.428	1.7073e-11	7	LOC114674016
5.58835e-16	0.313947	0.326	0.227	1.96822e-11	7	TTC39B
6.09456e-16	0.256115	0.318	0.218	2.1465e-11	7	FCMR
6.8075e-16	0.389178	0.789	0.756	2.3976e-11	7	MPZL1
7.10735e-16	0.274754	0.77	0.736	2.50321e-11	7	PUM2
7.36104e-16	0.33672	0.719	0.663	2.59256e-11	7	TENT5C
7.86458e-16	0.300187	0.921	0.896	2.76991e-11	7	ANKRD11
8.17815e-16	0.31284	0.574	0.501	2.88034e-11	7	LPIN1
1.00962e-15	0.367957	0.702	0.661	3.5559e-11	7	ZNF148
1.15744e-15	0.334209	0.742	0.694	4.07652e-11	7	FLI1
1.2851e-15	0.281114	0.756	0.697	4.52611e-11	7	SENP6
1.53148e-15	0.303964	0.875	0.842	5.39387e-11	7	FYN
1.92588e-15	0.361618	0.657	0.567	6.78294e-11	7	CHN2
2.04342e-15	0.329701	0.753	0.705	7.19692e-11	7	LOC106999939
2.57595e-15	0.390289	0.745	0.687	9.0725e-11	7	BCL2
2.95291e-15	0.299959	0.669	0.609	1.04001e-10	7	RBM26
4.5452e-15	0.2764	0.729	0.671	1.60082e-10	7	ITPR2
5.66279e-15	0.344513	0.728	0.666	1.99444e-10	7	FBXL17
8.29488e-15	0.293492	0.732	0.678	2.92146e-10	7	RFX3
9.74106e-15	0.262739	0.316	0.222	3.4308e-10	7	LOC710876
1.09273e-14	0.394771	0.573	0.499	3.8486e-10	7	TNFSF4
1.09662e-14	0.266019	0.947	0.936	3.86229e-10	7	RIPOR2
1.15844e-14	0.453492	0.337	0.258	4.08001e-10	7	OTUD5
1.26538e-14	0.642109	0.259	0.184	4.45668e-10	7	GK5
1.30068e-14	0.266379	0.794	0.758	4.58099e-10	7	LCP2
1.30956e-14	0.364706	0.265	0.185	4.61229e-10	7	ITGAE
1.64398e-14	0.282218	0.885	0.839	5.79008e-10	7	PPP3CA
2.23693e-14	0.300718	0.97	0.946	7.87845e-10	7	KEG06-p11
2.98827e-14	0.381435	0.464	0.377	1.05247e-09	7	JAKMIP1
3.03136e-14	0.351317	0.5	0.422	1.06764e-09	7	PREP
3.07478e-14	0.284767	0.751	0.713	1.08294e-09	7	ST8SIA4
3.43001e-14	0.288358	0.896	0.863	1.20805e-09	7	CHST11
5.84014e-14	0.341226	0.631	0.577	2.0569e-09	7	PPP2R5E
6.01328e-14	0.326451	0.393	0.305	2.11788e-09	7	RAB11FIP1
7.05359e-14	0.389856	0.864	0.835	2.48427e-09	7	PPP2R5C
7.2931e-14	0.389682	0.629	0.582	2.56863e-09	7	FOSB
1.18591e-13	0.30883	0.532	0.448	4.17677e-09	7	WWP1
1.22117e-13	0.449463	0.392	0.309	4.30098e-09	7	PBX3
1.22784e-13	0.279449	0.542	0.465	4.32446e-09	7	USP44
1.31775e-13	0.436218	0.546	0.472	4.6411e-09	7	PIK3AP1
1.36275e-13	0.367268	0.48	0.396	4.7996e-09	7	TULP4
1.64075e-13	0.323273	0.615	0.567	5.7787e-09	7	FGD3
2.01069e-13	0.341254	0.666	0.596	7.08165e-09	7	PLCL2
2.50736e-13	0.392593	0.551	0.485	8.83092e-09	7	STAU2
2.66186e-13	0.346066	0.756	0.701	9.37507e-09	7	CDK17
2.74571e-13	0.335166	0.691	0.636	9.67038e-09	7	PHF21A
3.4581e-13	0.437467	0.5	0.436	1.21794e-08	7	LRMP
3.79765e-13	0.284719	0.265	0.184	1.33753e-08	7	ZNF395
3.90336e-13	0.441279	0.368	0.289	1.37476e-08	7	TIPARP
4.69286e-13	0.34916	0.407	0.319	1.65282e-08	7	MYO6
9.32291e-13	0.349278	0.599	0.535	3.28353e-08	7	FBXL20
9.39134e-13	0.348832	0.629	0.587	3.30763e-08	7	YPEL5
1.10237e-12	0.584978	0.712	0.704	3.88253e-08	7	KEG06-p04
1.31797e-12	0.29663	0.738	0.685	4.64188e-08	7	PIK3R1
1.32795e-12	0.716289	0.344	0.28	4.67703e-08	7	HIVEP3
1.54683e-12	0.299657	0.646	0.595	5.44795e-08	7	DCAF5
1.67436e-12	0.467471	0.997	0.994	5.89709e-08	7	LOC114674534
2.14876e-12	0.47821	0.719	0.704	7.56794e-08	7	LYST
2.41525e-12	0.316428	0.476	0.399	8.5065e-08	7	EEA1
4.17306e-12	0.275648	0.586	0.496	1.46975e-07	7	SKAP2
4.54656e-12	0.321828	0.654	0.587	1.6013e-07	7	LOC106999943
4.76836e-12	0.288615	0.309	0.227	1.67942e-07	7	PPP1R13B
4.8394e-12	0.385173	0.281	0.211	1.70444e-07	7	PAFAH2
4.88906e-12	0.369234	0.548	0.48	1.72193e-07	7	TBL1X
5.21576e-12	0.27845	0.665	0.615	1.83699e-07	7	ZNF638
5.41262e-12	0.297334	0.376	0.299	1.90633e-07	7	AXIN1
5.58321e-12	0.335864	0.606	0.568	1.96641e-07	7	KEG06-p06
6.23749e-12	0.310963	0.587	0.531	2.19684e-07	7	SOS2
6.38595e-12	0.31177	0.273	0.197	2.24913e-07	7	MRTFB
6.45539e-12	0.258559	0.357	0.273	2.27359e-07	7	RREB1
7.32534e-12	0.315675	0.656	0.609	2.57998e-07	7	GATAD2B
8.00234e-12	0.400032	0.277	0.204	2.81842e-07	7	HIPK2
9.48076e-12	0.316247	0.634	0.583	3.33912e-07	7	C6H5orf56
9.98528e-12	0.318564	0.53	0.469	3.51682e-07	7	ZMYND8
1.1854e-11	0.325839	0.29	0.219	4.17498e-07	7	SLC15A4
1.2582e-11	0.292293	0.738	0.681	4.43139e-07	7	EIF4G3
1.86012e-11	0.27223	0.764	0.726	6.55135e-07	7	CDKAL1
2.31017e-11	0.289924	0.39	0.313	8.13642e-07	7	RFTN1
2.33197e-11	0.296835	0.513	0.423	8.21321e-07	7	ZEB1
3.03284e-11	0.325203	0.406	0.333	1.06817e-06	7	SMURF2
3.05912e-11	0.27327	0.564	0.499	1.07742e-06	7	FAM13B
3.27773e-11	0.419405	0.584	0.535	1.15442e-06	7	MTMR12
3.37809e-11	0.297715	0.567	0.509	1.18976e-06	7	DNAJB14
3.40464e-11	0.362972	0.45	0.376	1.19911e-06	7	BBS9
3.68311e-11	0.291396	0.317	0.237	1.29719e-06	7	KIFAP3
4.54442e-11	0.274435	0.659	0.605	1.60055e-06	7	RPS6KA5
5.69546e-11	0.340578	0.43	0.35	2.00594e-06	7	FOXO3
5.9682e-11	0.293863	0.616	0.58	2.102e-06	7	USP9Y
6.23711e-11	0.288147	0.504	0.433	2.19671e-06	7	SUSD6
6.45614e-11	0.276187	0.509	0.438	2.27385e-06	7	STK24
6.81951e-11	0.405012	0.317	0.251	2.40183e-06	7	CASP10
7.12604e-11	0.270555	0.608	0.553	2.50979e-06	7	SEPTIN11
8.17643e-11	0.267073	0.36	0.283	2.87974e-06	7	RCHY1
8.37356e-11	0.347481	0.43	0.353	2.94917e-06	7	DAPK2
9.37036e-11	0.305493	0.601	0.531	3.30024e-06	7	DENND1A
1.06932e-10	0.349503	0.464	0.402	3.76613e-06	7	TASP1
1.22668e-10	0.34483	0.559	0.512	4.32036e-06	7	CNST
1.38932e-10	0.330276	0.534	0.477	4.89317e-06	7	AUH
1.91779e-10	0.300614	0.277	0.208	6.75446e-06	7	CAMSAP1
1.95968e-10	0.350685	0.538	0.487	6.90201e-06	7	TPST2
2.2099e-10	0.397047	0.473	0.401	7.78328e-06	7	NFKB1
2.50374e-10	0.267231	0.581	0.53	8.81818e-06	7	PLEKHA2
2.72053e-10	0.265618	0.286	0.209	9.5817e-06	7	KEG06-p05
3.10652e-10	0.294613	0.567	0.511	1.09412e-05	7	TASOR2
3.73097e-10	0.257785	0.593	0.534	1.31405e-05	7	LOC712543
3.88052e-10	0.479669	0.562	0.521	1.36672e-05	7	ARID5B
6.17357e-10	0.281374	0.349	0.275	2.17433e-05	7	LOC106995407
6.27487e-10	0.254496	0.797	0.757	2.21001e-05	7	PIK3R5
6.49561e-10	0.291248	0.595	0.551	2.28775e-05	7	CLASP2
6.61925e-10	0.320482	0.498	0.442	2.3313e-05	7	PPP1R10
8.96945e-10	0.309714	0.645	0.615	3.15904e-05	7	XPO6
9.12504e-10	0.260785	0.75	0.719	3.21384e-05	7	PAN3
9.4906e-10	0.310502	0.603	0.551	3.34259e-05	7	LOC707555
1.06773e-09	0.570425	0.564	0.53	3.76056e-05	7	GRK5
1.50084e-09	0.285618	0.464	0.411	5.28595e-05	7	HDLBP
1.77718e-09	0.257487	0.727	0.694	6.25924e-05	7	CDK13
1.98792e-09	0.268646	0.535	0.48	7.00147e-05	7	UXS1
2.08776e-09	0.288253	0.613	0.559	7.35308e-05	7	GATAD2A
2.46301e-09	0.289999	0.572	0.529	8.67471e-05	7	PIK3CD
2.5711e-09	0.366238	0.348	0.281	9.05542e-05	7	THY1
2.79265e-09	0.253346	0.308	0.239	9.83572e-05	7	LOC107000335
2.91975e-09	0.288163	0.509	0.455	0.000102834	7	FARS2
3.04166e-09	0.340726	0.527	0.457	0.000107127	7	PDE4D
3.17956e-09	0.341454	0.403	0.341	0.000111984	7	DGKD
3.47756e-09	0.353617	0.608	0.578	0.00012248	7	STAT3
3.78248e-09	0.260543	0.62	0.571	0.000133219	7	TNKS
4.62813e-09	0.339532	0.577	0.539	0.000163003	7	SQSTM1
4.90313e-09	0.251422	0.632	0.602	0.000172688	7	TRIP12
5.08349e-09	0.264849	0.77	0.735	0.000179041	7	GSK3B
5.51807e-09	0.291901	0.404	0.337	0.000194346	7	PRKAG2
5.57409e-09	0.261263	0.261	0.201	0.00019632	7	TM6SF1
5.64775e-09	0.255198	0.698	0.667	0.000198914	7	ATP10A
7.06895e-09	0.425563	0.435	0.373	0.000248968	7	AGPAT4
1.09559e-08	0.260525	0.593	0.551	0.000385868	7	PTPN2
1.17789e-08	0.282814	0.613	0.58	0.000414852	7	TBC1D22A
1.18314e-08	0.250692	0.608	0.582	0.000416701	7	OGT
1.54393e-08	0.270321	0.744	0.727	0.000543774	7	KDM2A
1.61766e-08	0.273951	0.736	0.732	0.000569739	7	MYO1F
1.83102e-08	0.329748	0.385	0.331	0.000644884	7	SLC44A2
1.95565e-08	0.345311	0.659	0.62	0.000688778	7	BCAS3
3.01332e-08	0.27193	0.563	0.513	0.00106129	7	LRCH1
3.05855e-08	0.280424	0.654	0.621	0.00107722	7	ANKRD17
5.11952e-08	0.310623	0.26	0.204	0.0018031	7	KSR1
5.43995e-08	0.2762	0.729	0.692	0.00191595	7	RAB27A
5.44253e-08	0.4423	0.504	0.457	0.00191686	7	TFDP2
5.45421e-08	0.25041	0.384	0.321	0.00192097	7	FBXL4
6.04686e-08	0.270788	0.565	0.521	0.0021297	7	MED13
7.17846e-08	0.281314	0.626	0.578	0.00252826	7	SUPT3H
7.22307e-08	0.269153	0.45	0.403	0.00254396	7	KIZ
7.97699e-08	0.291125	0.731	0.698	0.0028095	7	CAMK1D
8.22616e-08	0.326708	0.522	0.482	0.00289725	7	MNAT1
8.47221e-08	0.258452	0.473	0.423	0.00298391	7	FBXW4
8.49383e-08	0.262949	0.622	0.577	0.00299153	7	TESC
9.52844e-08	0.265968	0.448	0.396	0.00335592	7	RIF1
1.0671e-07	0.250454	0.26	0.202	0.00375833	7	SIDT1
1.09094e-07	0.254921	0.258	0.198	0.00384228	7	CRACR2A
1.63862e-07	0.300792	0.921	0.935	0.00577121	7	KEG06-r02
1.73034e-07	0.40794	0.401	0.349	0.00609426	7	FAM49A
1.93146e-07	0.288691	0.441	0.395	0.00680262	7	ARHGEF7
1.97785e-07	0.255907	0.647	0.598	0.00696597	7	BTBD9
2.22769e-07	0.259684	0.637	0.601	0.00784592	7	DYM
2.28239e-07	0.263583	0.375	0.315	0.00803857	7	GALNT2
2.59547e-07	0.254774	0.563	0.537	0.00914124	7	SPEN
2.66991e-07	0.308002	0.305	0.245	0.00940343	7	PLXNC1
2.72891e-07	0.26732	0.408	0.357	0.00961123	7	STARD3NL
2.79069e-07	0.293664	0.474	0.43	0.0098288	7	TLK2
2.91124e-07	0.273823	0.457	0.412	0.0102534	7	SH2D1A
2.97001e-07	0.340162	0.401	0.355	0.0104604	7	E2F3
4.63393e-07	0.279819	0.578	0.545	0.0163207	7	CCND2
5.7005e-07	0.293353	0.325	0.269	0.0200771	7	LOC106996755
5.75573e-07	0.264167	0.332	0.271	0.0202717	7	ZNF827
6.09025e-07	0.258686	0.517	0.484	0.0214499	7	RNF115
6.29423e-07	0.256625	0.614	0.576	0.0221683	7	TMEM181
6.78318e-07	0.265115	0.534	0.488	0.0238904	7	FAM214A
8.09858e-07	0.295022	0.297	0.245	0.0285232	7	SPATS2L
1.31501e-06	0.28772	0.488	0.44	0.0463145	7	LOC107000013
1.3318e-06	0.258325	0.491	0.44	0.0469061	7	LCORL
