# Supplementary material for: T cell-mediated SIV dissemination into the CNS: a single-cell transcriptomic analysis
Source: Research Square preprint supplement (doi:10.21203/rs.3.rs-6537361/v1), 2025-05-09
Supplement: Supplementary file 4 [file 31d004a060be024b60faff04.xlsx]

## Sheet: Mac_T vs macrophage clusters
	Cluster	ID	Description	GeneRatio	BgRatio	pvalue	p.adjust	qvalue	geneID	Count
1	SPP1_Mac	GO:0055094	response to lipoprotein particle	9/156	39/18870	2.45127e-11	7.75092e-08	5.65857e-08	4023/54209/3689/348/10628/948/928/2207/5468	9
2	SPP1_Mac	GO:0071402	cellular response to lipoprotein particle stimulus	9/156	42/18870	5.05004e-11	7.98411e-08	5.82881e-08	4023/54209/3689/348/10628/948/928/2207/5468	9
3	SPP1_Mac	GO:0051235	maintenance of location	19/156	350/18870	9.38799e-11	9.89494e-08	7.22381e-08	4023/6280/2934/54209/348/6546/4481/55704/3988/7114/808/948/10062/2495/5552/2316/811/5468/2760	19
4	SPP1_Mac	GO:0071404	cellular response to low-density lipoprotein particle stimulus	8/156	38/18870	7.21839e-10	5.70614e-07	4.16577e-07	4023/54209/3689/10628/948/928/2207/5468	8
5	SPP1_Mac	GO:0010878	cholesterol storage	7/156	25/18870	9.78016e-10	5.89919e-07	4.30671e-07	4023/54209/4481/3988/948/10062/5468	7
6	SPP1_Mac	GO:0045730	respiratory burst	8/156	40/18870	1.11939e-09	5.89919e-07	4.30671e-07	1043/54209/5880/1536/3988/6556/56833/4688	8
7	SPP1_Mac	GO:0007229	integrin-mediated signaling pathway	11/156	111/18870	2.01105e-09	9.0842e-07	6.63193e-07	3689/8829/3675/7791/3693/3687/3987/3655/3684/2268/2316	11
8	SPP1_Mac	GO:0010885	regulation of cholesterol storage	6/156	19/18870	7.19607e-09	2.84425e-06	2.07644e-06	4023/54209/4481/948/10062/5468	6
9	SPP1_Mac	GO:0006909	phagocytosis	14/156	237/18870	1.08589e-08	3.81509e-06	2.78521e-06	2934/54209/3689/4481/6556/948/2207/10062/11031/4688/3684/2268/811/10417	14
10	SPP1_Mac	GO:0034381	plasma lipoprotein particle clearance	8/156	55/18870	1.59589e-08	5.0462e-06	3.68398e-06	54209/348/4481/302/3988/948/57552/341	8
11	SPP1_Mac	GO:0097242	amyloid-beta clearance	7/156	39/18870	2.84022e-08	8.16435e-06	5.96039e-06	54209/3689/348/4481/948/3459/3684	7
12	SPP1_Mac	GO:0052547	regulation of peptidase activity	15/156	312/18870	4.99016e-08	1.31491e-05	9.5995e-06	4318/6280/2934/1476/10134/960/7805/444/1893/2876/5329/4217/1514/5468/7078	15
13	SPP1_Mac	GO:0097006	regulation of plasma lipoprotein particle levels	9/156	91/18870	6.29039e-08	1.53002e-05	1.11699e-05	4023/54209/348/4481/302/3988/948/57552/341	9
14	SPP1_Mac	GO:0002573	myeloid leukocyte differentiation	13/156	235/18870	8.03376e-08	1.76206e-05	1.28639e-05	4318/54209/302/81501/4286/29887/7351/84293/10370/6688/2124/10312/5468	13
15	SPP1_Mac	GO:0019915	lipid storage	9/156	94/18870	8.35891e-08	1.76206e-05	1.28639e-05	4023/54209/348/4481/3988/948/10062/5468/2760	9
16	SPP1_Mac	GO:0002274	myeloid leukocyte activation	13/156	241/18870	1.07777e-07	2.12995e-05	1.55497e-05	54209/3689/5880/81501/6556/2207/10062/3459/3606/11326/6688/3684/2268	13
17	SPP1_Mac	GO:0006911	phagocytosis, engulfment	7/156	49/18870	1.48019e-07	2.75315e-05	2.00994e-05	2934/54209/3689/4481/948/11031/3684	7
18	SPP1_Mac	GO:0006869	lipid transport	17/156	453/18870	2.21522e-07	3.8914e-05	2.84092e-05	6696/2171/54209/348/366/4481/302/1382/3988/79895/948/10062/8714/341/5468/2760/2167	17
19	SPP1_Mac	GO:0010743	regulation of macrophage derived foam cell differentiation	6/156	33/18870	2.66982e-07	4.3639e-05	3.18587e-05	4023/4481/948/10062/3606/5468	6
20	SPP1_Mac	GO:0031589	cell-substrate adhesion	15/156	356/18870	2.76021e-07	4.3639e-05	3.18587e-05	3689/8829/5880/960/948/3675/7791/3693/3687/87/3987/3655/3684/2316/811	15
21	SPP1_Mac	GO:1905954	positive regulation of lipid localization	9/156	111/18870	3.52415e-07	5.30637e-05	3.87392e-05	6696/4023/54209/348/4481/302/948/10062/5468	9
22	SPP1_Mac	GO:0099024	plasma membrane invagination	7/156	58/18870	4.86847e-07	6.77429e-05	4.94558e-05	2934/54209/3689/4481/948/11031/3684	7
23	SPP1_Mac	GO:0050727	regulation of inflammatory response	16/156	425/18870	4.92754e-07	6.77429e-05	4.94558e-05	4023/4318/6280/54209/348/7114/3957/10062/3606/23765/283131/56833/2876/2268/5468/2167	16
24	SPP1_Mac	GO:0030099	myeloid cell differentiation	16/156	430/18870	5.75444e-07	7.58148e-05	5.53486e-05	4318/54209/302/81501/3988/4286/29887/87/7351/84293/10370/6688/2124/2316/10312/5468	16
25	SPP1_Mac	GO:0051651	maintenance of location in cell	12/156	237/18870	6.66108e-07	8.31688e-05	6.07175e-05	6280/2934/348/6546/55704/7114/808/2495/5552/2316/811/2760	12
26	SPP1_Mac	GO:2000116	regulation of cysteine-type endopeptidase activity	11/156	195/18870	6.83867e-07	8.31688e-05	6.07175e-05	4318/6280/2934/10134/960/7805/444/2876/5329/4217/5468	11
27	SPP1_Mac	GO:0007160	cell-matrix adhesion	12/156	239/18870	7.28181e-07	8.52781e-05	6.22573e-05	3689/8829/960/948/3675/7791/3693/3687/87/3987/3655/3684	12
28	SPP1_Mac	GO:0010742	macrophage derived foam cell differentiation	6/156	40/18870	8.82127e-07	9.96173e-05	7.27257e-05	4023/4481/948/10062/3606/5468	6
29	SPP1_Mac	GO:0090077	foam cell differentiation	6/156	41/18870	1.02633e-06	0.000109551	7.99779e-05	4023/4481/948/10062/3606/5468	6
30	SPP1_Mac	GO:0043281	regulation of cysteine-type endopeptidase activity involved in apoptotic process	10/156	163/18870	1.04162e-06	0.000109551	7.99779e-05	4318/6280/2934/10134/960/7805/2876/5329/4217/5468	10
31	SPP1_Mac	GO:0010324	membrane invagination	7/156	65/18870	1.07403e-06	0.000109551	7.99779e-05	2934/54209/3689/4481/948/11031/3684	7
32	SPP1_Mac	GO:0061572	actin filament bundle organization	10/156	165/18870	1.16431e-06	0.000113065	8.2543e-05	28984/8829/55704/7791/3693/3936/87/2316/57698/389	10
33	SPP1_Mac	GO:0030301	cholesterol transport	9/156	128/18870	1.17999e-06	0.000113065	8.2543e-05	54209/348/4481/302/3988/948/10062/341/5468	9
34	SPP1_Mac	GO:1901654	response to ketone	11/156	208/18870	1.29222e-06	0.000120177	8.7735e-05	6696/2203/2230/1536/3988/10628/2/1545/10062/978/811	11
35	SPP1_Mac	GO:0007015	actin filament organization	16/156	464/18870	1.56101e-06	0.000141026	0.000102956	2934/28984/8829/5880/55704/7114/10095/7791/4643/3693/3936/4542/87/2316/57698/389	16
36	SPP1_Mac	GO:0006898	receptor-mediated endocytosis	12/156	258/18870	1.62791e-06	0.000142985	0.000104386	3689/348/4481/302/948/928/2207/8650/11031/341/3684/1514	12
37	SPP1_Mac	GO:0006935	chemotaxis	16/156	468/18870	1.74477e-06	0.000149107	0.000108856	6280/54209/3689/8829/5880/4046/7114/6275/23768/2207/5872/23765/56833/5329/6688/811	16
38	SPP1_Mac	GO:0042330	taxis	16/156	470/18870	1.84377e-06	0.000153421	0.000112005	6280/54209/3689/8829/5880/4046/7114/6275/23768/2207/5872/23765/56833/5329/6688/811	16
39	SPP1_Mac	GO:0015918	sterol transport	9/156	141/18870	2.64317e-06	0.000209958	0.00015328	54209/348/4481/302/3988/948/10062/341/5468	9
40	SPP1_Mac	GO:0010631	epithelial cell migration	14/156	372/18870	2.65601e-06	0.000209958	0.00015328	6678/4318/6280/28984/348/8829/7114/152007/3675/1545/5872/2876/811/5468	14
41	SPP1_Mac	GO:0090132	epithelium migration	14/156	375/18870	2.91546e-06	0.000223608	0.000163245	6678/4318/6280/28984/348/8829/7114/152007/3675/1545/5872/2876/811/5468	14
42	SPP1_Mac	GO:1905952	regulation of lipid localization	10/156	183/18870	2.97012e-06	0.000223608	0.000163245	6696/4023/54209/348/4481/302/948/10062/341/5468	10
43	SPP1_Mac	GO:0048771	tissue remodeling	10/156	184/18870	3.11878e-06	0.000229339	0.000167429	6696/5880/81501/3988/4286/3606/29887/2316/10312/5468	10
44	SPP1_Mac	GO:0090130	tissue migration	14/156	380/18870	3.39842e-06	0.000244223	0.000178295	6678/4318/6280/28984/348/8829/7114/152007/3675/1545/5872/2876/811/5468	14
45	SPP1_Mac	GO:0001819	positive regulation of cytokine production	16/156	499/18870	3.9735e-06	0.000279205	0.000203834	1116/4023/54209/28984/1536/6556/7805/948/1545/10159/2207/3459/3606/23765/2268/10417	16
46	SPP1_Mac	GO:0052548	regulation of endopeptidase activity	12/156	288/18870	5.0657e-06	0.000348211	0.000254212	4318/6280/2934/10134/960/7805/444/2876/5329/4217/5468/7078	12
47	SPP1_Mac	GO:0010883	regulation of lipid storage	6/156	54/18870	5.3957e-06	0.000363005	0.000265012	4023/54209/4481/948/10062/5468	6
48	SPP1_Mac	GO:0030100	regulation of endocytosis	12/156	291/18870	5.62967e-06	0.000370854	0.000270743	54209/348/302/6556/948/2207/10062/8650/11031/341/2268/811	12
49	SPP1_Mac	GO:1990748	cellular detoxification	8/156	119/18870	6.57831e-06	0.000424502	0.000309908	6280/348/4257/6556/948/2876/84293/4259	8
50	SPP1_Mac	GO:0051017	actin filament bundle assembly	9/156	161/18870	7.83467e-06	0.000495464	0.000361714	28984/8829/55704/7791/3693/3936/87/2316/389	9
51	SPP1_Mac	GO:0050777	negative regulation of immune response	10/156	205/18870	8.13563e-06	0.000498524	0.000363948	54209/2/10062/11326/25939/56833/2876/6688/2268/5468	10
52	SPP1_Mac	GO:0034383	low-density lipoprotein particle clearance	5/156	34/18870	8.3026e-06	0.000498524	0.000363948	54209/302/3988/948/57552	5
53	SPP1_Mac	GO:0033627	cell adhesion mediated by integrin	7/156	88/18870	8.35603e-06	0.000498524	0.000363948	3689/3675/1545/3693/3687/3655/3684	7
54	SPP1_Mac	GO:0015850	organic hydroxy compound transport	12/156	308/18870	9.99388e-06	0.000585197	0.000427224	6696/54209/348/366/4481/302/3988/948/10062/8714/341/5468	12
55	SPP1_Mac	GO:0032102	negative regulation of response to external stimulus	15/156	481/18870	1.12456e-05	0.000636025	0.000464331	6696/54209/348/8829/302/2/928/10062/11326/25939/56833/2876/5329/2268/5468	15
56	SPP1_Mac	GO:0097237	cellular response to toxic substance	8/156	128/18870	1.12642e-05	0.000636025	0.000464331	6280/348/4257/6556/948/2876/84293/4259	8
57	SPP1_Mac	GO:0032373	positive regulation of sterol transport	5/156	38/18870	1.45831e-05	0.000795032	0.000580414	54209/348/302/10062/5468	5
58	SPP1_Mac	GO:0032376	positive regulation of cholesterol transport	5/156	38/18870	1.45831e-05	0.000795032	0.000580414	54209/348/302/10062/5468	5
59	SPP1_Mac	GO:0002283	neutrophil activation involved in immune response	4/156	19/18870	1.58142e-05	0.000833406	0.000608429	3689/2207/6688/3684	4
60	SPP1_Mac	GO:0010744	positive regulation of macrophage derived foam cell differentiation	4/156	19/18870	1.58142e-05	0.000833406	0.000608429	4023/4481/948/3606	4
61	SPP1_Mac	GO:0002275	myeloid cell activation involved in immune response	7/156	98/18870	1.69966e-05	0.000881035	0.000643201	54209/3689/5880/2207/6688/3684/2268	7
62	SPP1_Mac	GO:0098869	cellular oxidant detoxification	7/156	99/18870	1.81642e-05	0.000926374	0.0006763	6280/348/4257/948/2876/84293/4259	7
63	SPP1_Mac	GO:0050764	regulation of phagocytosis	7/156	100/18870	1.93973e-05	0.000973558	0.000710747	54209/6556/948/2207/11031/2268/811	7
64	SPP1_Mac	GO:0002697	regulation of immune effector process	13/156	389/18870	2.16531e-05	0.0010698	0.000781006	54209/3689/5880/2/7805/948/3606/11326/56833/6688/3684/2268/10417	13
65	SPP1_Mac	GO:0042119	neutrophil activation	5/156	42/18870	2.40654e-05	0.00117069	0.000854661	3689/2207/3606/6688/3684	5
66	SPP1_Mac	GO:0043542	endothelial cell migration	11/156	284/18870	2.49911e-05	0.0011973	0.000874091	6678/6280/28984/348/8829/7114/1545/5872/2876/811/5468	11
67	SPP1_Mac	GO:0072593	reactive oxygen species metabolic process	10/156	234/18870	2.56199e-05	0.00120911	0.000882709	3689/5880/1536/3988/948/1545/2876/4688/7351/3684	10
68	SPP1_Mac	GO:0050900	leukocyte migration	13/156	396/18870	2.60771e-05	0.00121259	0.00088525	6280/54209/3689/5880/3675/928/2207/23765/1893/56833/6688/3655/811	13
69	SPP1_Mac	GO:0006641	triglyceride metabolic process	7/156	106/18870	2.8335e-05	0.00127993	0.000934414	4023/348/3988/84803/10062/2876/341	7
70	SPP1_Mac	GO:0030316	osteoclast differentiation	7/156	106/18870	2.8335e-05	0.00127993	0.000934414	54209/302/81501/4286/29887/84293/10312	7
71	SPP1_Mac	GO:0050766	positive regulation of phagocytosis	6/156	72/18870	2.88808e-05	0.00128562	0.000938567	54209/6556/948/2207/11031/811	6
72	SPP1_Mac	GO:0097062	dendritic spine maintenance	4/156	22/18870	2.9274e-05	0.00128562	0.000938567	54209/348/3675/91752	4
73	SPP1_Mac	GO:0033344	cholesterol efflux	6/156	73/18870	3.12541e-05	0.00135378	0.000988325	54209/348/3988/10062/341/5468	6
74	SPP1_Mac	GO:0038061	non-canonical NF-kappaB signal transduction	8/156	148/18870	3.2287e-05	0.00137961	0.00100719	1116/54209/7114/7805/3606/3987/6688/811	8
75	SPP1_Mac	GO:0042116	macrophage activation	7/156	110/18870	3.59939e-05	0.0015121	0.00110391	54209/3689/6556/10062/3459/11326/3684	7
76	SPP1_Mac	GO:0046942	carboxylic acid transport	12/156	351/18870	3.6344e-05	0.0015121	0.00110391	2171/348/366/1382/6556/948/126321/8714/6507/7351/5468/2167	12
77	SPP1_Mac	GO:0015849	organic acid transport	12/156	352/18870	3.73617e-05	0.00153426	0.00112008	2171/348/366/1382/6556/948/126321/8714/6507/7351/5468/2167	12
78	SPP1_Mac	GO:0050729	positive regulation of inflammatory response	8/156	152/18870	3.90701e-05	0.00158384	0.00115629	4023/6280/54209/3957/3606/23765/283131/2167	8
79	SPP1_Mac	GO:0043300	regulation of leukocyte degranulation	5/156	47/18870	4.19753e-05	0.00168008	0.00122654	3689/5880/6688/3684/2268	5
80	SPP1_Mac	GO:1901222	regulation of non-canonical NF-kappaB signal transduction	7/156	113/18870	4.27909e-05	0.00169131	0.00123474	54209/7114/7805/3606/3987/6688/811	7
81	SPP1_Mac	GO:0007584	response to nutrient	8/156	155/18870	4.49052e-05	0.00173159	0.00126415	6696/4023/1536/3988/2/1545/2876/5468	8
82	SPP1_Mac	GO:0045807	positive regulation of endocytosis	8/156	155/18870	4.49052e-05	0.00173159	0.00126415	54209/348/302/6556/948/2207/11031/811	8
83	SPP1_Mac	GO:0042060	wound healing	13/156	423/18870	5.14283e-05	0.00191214	0.00139596	348/302/6556/960/948/928/2207/26509/2876/5329/2316/389/5468	13
84	SPP1_Mac	GO:0098754	detoxification	8/156	158/18870	5.14502e-05	0.00191214	0.00139596	6280/348/4257/6556/948/2876/84293/4259	8
85	SPP1_Mac	GO:0036230	granulocyte activation	5/156	49/18870	5.14915e-05	0.00191214	0.00139596	3689/2207/3606/6688/3684	5
86	SPP1_Mac	GO:0032371	regulation of sterol transport	6/156	80/18870	5.26109e-05	0.00191214	0.00139596	54209/348/302/10062/341/5468	6
87	SPP1_Mac	GO:0032374	regulation of cholesterol transport	6/156	80/18870	5.26109e-05	0.00191214	0.00139596	54209/348/302/10062/341/5468	6
88	SPP1_Mac	GO:0150076	neuroinflammatory response	6/156	82/18870	6.04792e-05	0.00217313	0.00158649	4318/54209/3689/3459/3606/3684	6
89	SPP1_Mac	GO:0001667	ameboidal-type cell migration	14/156	497/18870	6.73394e-05	0.0023894	0.00174438	6678/4318/6280/28984/348/8829/7114/152007/3675/1545/5872/2876/811/5468	14
90	SPP1_Mac	GO:0010875	positive regulation of cholesterol efflux	4/156	27/18870	6.80094e-05	0.0023894	0.00174438	54209/348/10062/5468	4
91	SPP1_Mac	GO:0097193	intrinsic apoptotic signaling pathway	11/156	319/18870	7.16518e-05	0.0024897	0.00181761	4318/6280/54209/10134/960/597/1545/2876/23612/5329/4217	11
92	SPP1_Mac	GO:0010811	positive regulation of cell-substrate adhesion	7/156	123/18870	7.34635e-05	0.00252491	0.00184331	8829/948/3675/3987/3655/2316/811	7
93	SPP1_Mac	GO:0032370	positive regulation of lipid transport	6/156	86/18870	7.90306e-05	0.00268704	0.00196168	6696/54209/348/302/10062/5468	6
94	SPP1_Mac	GO:0015711	organic anion transport	13/156	443/18870	8.20778e-05	0.00275428	0.00201076	2171/348/366/4257/1382/6556/948/126321/8714/6507/7351/5468/2167	13
95	SPP1_Mac	GO:0060326	cell chemotaxis	11/156	325/18870	8.45843e-05	0.00275428	0.00201076	6280/3689/8829/5880/7114/2207/5872/23765/56833/6688/811	11
96	SPP1_Mac	GO:0002699	positive regulation of immune effector process	10/156	270/18870	8.54272e-05	0.00275428	0.00201076	54209/3689/5880/7805/948/3606/6688/3684/2268/10417	10
97	SPP1_Mac	GO:0051346	negative regulation of hydrolase activity	9/156	218/18870	8.54367e-05	0.00275428	0.00201076	4318/1476/2644/960/1893/2876/341/5329/7078	9
98	SPP1_Mac	GO:0010952	positive regulation of peptidase activity	8/156	170/18870	8.61259e-05	0.00275428	0.00201076	6280/2934/10134/7805/444/4217/1514/5468	8
99	SPP1_Mac	GO:0010887	negative regulation of cholesterol storage	3/156	11/18870	8.71056e-05	0.00275428	0.00201076	54209/10062/5468	3
100	SPP1_Mac	GO:2000644	regulation of receptor catabolic process	3/156	11/18870	8.71056e-05	0.00275428	0.00201076	348/302/7805	3
101	SPP1_Mac	GO:0031623	receptor internalization	7/156	128/18870	9.44661e-05	0.00293833	0.00214513	3689/302/948/928/2207/8650/11031	7
102	SPP1_Mac	GO:0001960	negative regulation of cytokine-mediated signaling pathway	6/156	89/18870	9.57141e-05	0.00293833	0.00214513	54209/3557/10062/25939/1893/5468	6
103	SPP1_Mac	GO:0046849	bone remodeling	6/156	89/18870	9.57141e-05	0.00293833	0.00214513	6696/5880/81501/4286/29887/10312	6
104	SPP1_Mac	GO:2001056	positive regulation of cysteine-type endopeptidase activity	7/156	129/18870	9.9202e-05	0.00301612	0.00220192	6280/2934/10134/7805/444/4217/5468	7
105	SPP1_Mac	GO:0050866	negative regulation of cell activation	9/156	223/18870	0.000101567	0.00305784	0.00223238	54209/348/4332/7805/928/10062/11326/6688/2268	9
106	SPP1_Mac	GO:0010975	regulation of neuron projection development	13/156	453/18870	0.00010262	0.00305784	0.00223238	6696/6280/348/6383/8829/55704/1382/7431/3675/91752/3655/2316/57698	13
107	SPP1_Mac	GO:0090382	phagosome maturation	4/156	30/18870	0.00010417	0.00305784	0.00223238	55686/11031/56833/10312	4
108	SPP1_Mac	GO:0055088	lipid homeostasis	8/156	175/18870	0.000105409	0.00305784	0.00223238	4023/54209/348/3988/10062/3606/5468/2167	8
109	SPP1_Mac	GO:1902905	positive regulation of supramolecular fiber organization	8/156	175/18870	0.000105409	0.00305784	0.00223238	2934/28984/348/8829/55704/2876/2316/389	8
110	SPP1_Mac	GO:0060612	adipose tissue development	5/156	57/18870	0.000107212	0.00308185	0.00224991	4023/3988/9462/6688/5468	5
111	SPP1_Mac	GO:0045824	negative regulation of innate immune response	6/156	91/18870	0.000108311	0.00308541	0.00225251	2/10062/11326/25939/56833/5468	6
112	SPP1_Mac	GO:0043312	neutrophil degranulation	3/156	12/18870	0.000115436	0.00320184	0.00233751	3689/6688/3684	3
113	SPP1_Mac	GO:2000508	regulation of dendritic cell chemotaxis	3/156	12/18870	0.000115436	0.00320184	0.00233751	56833/6688/811	3
114	SPP1_Mac	GO:2001267	regulation of cysteine-type endopeptidase activity involved in apoptotic signaling pathway	3/156	12/18870	0.000115436	0.00320184	0.00233751	4318/2934/5329	3
115	SPP1_Mac	GO:2001233	regulation of apoptotic signaling pathway	12/156	398/18870	0.000120485	0.00331281	0.00241852	4318/6280/54209/8829/10134/960/2876/5329/3655/8682/1514/7078	12
116	SPP1_Mac	GO:0015718	monocarboxylic acid transport	8/156	179/18870	0.000123294	0.00336083	0.00245358	2171/348/366/1382/948/8714/5468/2167	8
117	SPP1_Mac	GO:0006639	acylglycerol metabolic process	7/156	134/18870	0.000125873	0.00338975	0.00247469	4023/348/3988/84803/10062/2876/341	7
118	SPP1_Mac	GO:0002886	regulation of myeloid leukocyte mediated immunity	5/156	59/18870	0.000126499	0.00338975	0.00247469	3689/5880/6688/3684/2268	5
119	SPP1_Mac	GO:0060761	negative regulation of response to cytokine stimulus	6/156	94/18870	0.000129641	0.00344475	0.00251485	54209/3557/10062/25939/1893/5468	6
120	SPP1_Mac	GO:0006638	neutral lipid metabolic process	7/156	135/18870	0.000131847	0.00347418	0.00253633	4023/348/3988/84803/10062/2876/341	7
121	SPP1_Mac	GO:0010466	negative regulation of peptidase activity	7/156	137/18870	0.000144488	0.00377309	0.00275455	4318/1476/960/1893/2876/5329/7078	7
122	SPP1_Mac	GO:0032233	positive regulation of actin filament bundle assembly	5/156	61/18870	0.000148338	0.00377309	0.00275455	28984/8829/55704/2316/389	5
123	SPP1_Mac	GO:0060100	positive regulation of phagocytosis, engulfment	3/156	13/18870	0.000149158	0.00377309	0.00275455	54209/948/11031	3
124	SPP1_Mac	GO:0070486	leukocyte aggregation	3/156	13/18870	0.000149158	0.00377309	0.00275455	6280/5880/960	3
125	SPP1_Mac	GO:1905155	positive regulation of membrane invagination	3/156	13/18870	0.000149158	0.00377309	0.00275455	54209/948/11031	3
126	SPP1_Mac	GO:0045766	positive regulation of angiogenesis	8/156	185/18870	0.000154769	0.00385337	0.00281316	1116/8829/1536/694/1545/3687/1893/2022	8
127	SPP1_Mac	GO:1904018	positive regulation of vasculature development	8/156	185/18870	0.000154769	0.00385337	0.00281316	1116/8829/1536/694/1545/3687/1893/2022	8
128	SPP1_Mac	GO:0045765	regulation of angiogenesis	11/156	349/18870	0.000158256	0.00390942	0.00285408	1116/6678/28984/8829/1536/694/1545/3687/1893/2022/5468	11
129	SPP1_Mac	GO:0045862	positive regulation of proteolysis	11/156	350/18870	0.000162244	0.00397687	0.00290332	6280/2934/54209/348/302/10134/7805/444/4217/1514/5468	11
130	SPP1_Mac	GO:0010632	regulation of epithelial cell migration	10/156	295/18870	0.000176287	0.00428783	0.00313034	6678/4318/28984/348/8829/7114/152007/3675/811/5468	10
131	SPP1_Mac	GO:1901342	regulation of vasculature development	11/156	354/18870	0.000179063	0.00432212	0.00315536	1116/6678/28984/8829/1536/694/1545/3687/1893/2022/5468	11
132	SPP1_Mac	GO:0031346	positive regulation of cell projection organization	11/156	355/18870	0.000183492	0.00439546	0.00320891	6280/348/8829/5880/55704/1382/3675/91752/3655/2316/57698	11
133	SPP1_Mac	GO:0097529	myeloid leukocyte migration	9/156	242/18870	0.000188084	0.00441946	0.00322643	6280/54209/3689/5880/928/2207/23765/56833/6688	9
134	SPP1_Mac	GO:0034341	response to type II interferon	7/156	143/18870	0.000188421	0.00441946	0.00322643	2934/7431/6556/7791/10062/3459/5468	7
135	SPP1_Mac	GO:0140052	cellular response to oxidised low-density lipoprotein particle stimulus	3/156	14/18870	0.000188687	0.00441946	0.00322643	54209/10628/948	3
136	SPP1_Mac	GO:0045453	bone resorption	5/156	65/18870	0.000200563	0.00466309	0.0034043	6696/5880/81501/29887/10312	5
137	SPP1_Mac	GO:0010038	response to metal ion	11/156	359/18870	0.000202149	0.00466566	0.00340617	2203/4318/1536/10628/6556/808/4048/7351/10312/811/2167	11
138	SPP1_Mac	GO:0002366	leukocyte activation involved in immune response	10/156	301/18870	0.000207361	0.00475127	0.00346867	54209/3689/5880/6556/2207/3936/3606/6688/3684/2268	10
139	SPP1_Mac	GO:0045088	regulation of innate immune response	12/156	425/18870	0.000221228	0.00503253	0.003674	54209/348/4332/2/948/10062/11326/25939/56833/6688/2268/5468	12
140	SPP1_Mac	GO:0099173	postsynapse organization	8/156	196/18870	0.000229628	0.00507717	0.00370659	54209/348/8829/50807/3675/5552/87/91752	8
141	SPP1_Mac	GO:0002263	cell activation involved in immune response	10/156	305/18870	0.000230537	0.00507717	0.00370659	54209/3689/5880/6556/2207/3936/3606/6688/3684/2268	10
142	SPP1_Mac	GO:0015909	long-chain fatty acid transport	5/156	67/18870	0.000231414	0.00507717	0.00370659	2171/348/948/5468/2167	5
143	SPP1_Mac	GO:0010889	regulation of sequestering of triglyceride	3/156	15/18870	0.00023443	0.00507717	0.00370659	4023/54209/5468	3
144	SPP1_Mac	GO:0060099	regulation of phagocytosis, engulfment	3/156	15/18870	0.00023443	0.00507717	0.00370659	54209/948/11031	3
145	SPP1_Mac	GO:1902563	regulation of neutrophil activation	3/156	15/18870	0.00023443	0.00507717	0.00370659	3689/6688/3684	3
146	SPP1_Mac	GO:1905153	regulation of membrane invagination	3/156	15/18870	0.00023443	0.00507717	0.00370659	54209/948/11031	3
147	SPP1_Mac	GO:0031667	response to nutrient levels	13/156	495/18870	0.000245022	0.00527047	0.00384771	6696/2203/4023/348/1536/3988/2/9462/1545/2876/7351/4217/5468	13
148	SPP1_Mac	GO:0030193	regulation of blood coagulation	5/156	68/18870	0.000248131	0.00530128	0.0038702	348/302/948/928/5329	5
149	SPP1_Mac	GO:0032963	collagen metabolic process	6/156	106/18870	0.000250423	0.00531434	0.00387974	4318/28984/7431/1508/1514/2022	6
150	SPP1_Mac	GO:0002832	negative regulation of response to biotic stimulus	7/156	150/18870	0.000252707	0.00532707	0.00388903	54209/2/10062/11326/25939/56833/5468	7
151	SPP1_Mac	GO:1901224	positive regulation of non-canonical NF-kappaB signal transduction	5/156	69/18870	0.000265749	0.00556489	0.00406265	54209/7805/3606/3987/811	5
152	SPP1_Mac	GO:0009410	response to xenobiotic stimulus	12/156	434/18870	0.000267838	0.00557174	0.00406765	2203/1536/3988/10628/3675/1545/57552/8714/6507/2876/2022/811	12
153	SPP1_Mac	GO:1900046	regulation of hemostasis	5/156	70/18870	0.000284301	0.00581285	0.00424367	348/302/948/928/5329	5
154	SPP1_Mac	GO:0032368	regulation of lipid transport	7/156	153/18870	0.000285173	0.00581285	0.00424367	6696/54209/348/302/10062/341/5468	7
155	SPP1_Mac	GO:0002679	respiratory burst involved in defense response	3/156	16/18870	0.000286782	0.00581285	0.00424367	54209/3988/56833	3
156	SPP1_Mac	GO:1904177	regulation of adipose tissue development	3/156	16/18870	0.000286782	0.00581285	0.00424367	4023/6688/5468	3
157	SPP1_Mac	GO:0009636	response to toxic substance	9/156	258/18870	0.000302129	0.00601027	0.00438781	6280/348/4257/6556/948/1545/2876/84293/4259	9
158	SPP1_Mac	GO:0048002	antigen processing and presentation of peptide antigen	5/156	71/18870	0.00030382	0.00601027	0.00438781	54209/6556/2207/1514/811	5
159	SPP1_Mac	GO:0002444	myeloid leukocyte mediated immunity	6/156	110/18870	0.000306026	0.00601027	0.00438781	3689/5880/6688/3684/2268/10417	6
160	SPP1_Mac	GO:0030038	contractile actin filament bundle assembly	6/156	110/18870	0.000306026	0.00601027	0.00438781	28984/8829/55704/7791/3693/389	6
161	SPP1_Mac	GO:0043149	stress fiber assembly	6/156	110/18870	0.000306026	0.00601027	0.00438781	28984/8829/55704/7791/3693/389	6
162	SPP1_Mac	GO:0000302	response to reactive oxygen species	8/156	205/18870	0.000310971	0.0060697	0.00443119	4318/348/10628/948/1545/2876/7351/4217	8
163	SPP1_Mac	GO:0010950	positive regulation of endopeptidase activity	7/156	156/18870	0.000320911	0.00619546	0.004523	6280/2934/10134/7805/444/4217/5468	7
164	SPP1_Mac	GO:0043280	positive regulation of cysteine-type endopeptidase activity involved in apoptotic process	6/156	111/18870	0.000321333	0.00619546	0.004523	6280/2934/10134/7805/4217/5468	6
165	SPP1_Mac	GO:0006801	superoxide metabolic process	5/156	72/18870	0.000324338	0.00621549	0.00453763	3689/1536/948/4688/3684	5
166	SPP1_Mac	GO:0050818	regulation of coagulation	5/156	73/18870	0.000345888	0.00637309	0.00465268	348/302/948/928/5329	5
167	SPP1_Mac	GO:0032488	Cdc42 protein signal transduction	3/156	17/18870	0.000346127	0.00637309	0.00465268	348/8829/57698	3
168	SPP1_Mac	GO:0036005	response to macrophage colony-stimulating factor	3/156	17/18870	0.000346127	0.00637309	0.00465268	6696/54209/81501	3
169	SPP1_Mac	GO:1900120	regulation of receptor binding	3/156	17/18870	0.000346127	0.00637309	0.00465268	4318/8829/302	3
170	SPP1_Mac	GO:1903729	regulation of plasma membrane organization	3/156	17/18870	0.000346127	0.00637309	0.00465268	2934/302/50807	3
171	SPP1_Mac	GO:0031348	negative regulation of defense response	10/156	321/18870	0.000346191	0.00637309	0.00465268	54209/348/2/10062/11326/25939/56833/2876/2268/5468	10
172	SPP1_Mac	GO:0010976	positive regulation of neuron projection development	7/156	158/18870	0.000346671	0.00637309	0.00465268	6280/348/8829/3675/91752/3655/2316	7
173	SPP1_Mac	GO:0042554	superoxide anion generation	4/156	41/18870	0.000358696	0.00655606	0.00478626	3689/1536/4688/3684	4
174	SPP1_Mac	GO:0071216	cellular response to biotic stimulus	9/156	265/18870	0.000367501	0.00667838	0.00487556	4318/54209/7431/10628/948/10062/6688/978/10417	9
175	SPP1_Mac	GO:1900026	positive regulation of substrate adhesion-dependent cell spreading	4/156	42/18870	0.000393921	0.00707715	0.00516668	8829/3987/2316/811	4
176	SPP1_Mac	GO:1990000	amyloid fibril formation	4/156	42/18870	0.000393921	0.00707715	0.00516668	2934/54209/348/948	4
177	SPP1_Mac	GO:0015908	fatty acid transport	6/156	116/18870	0.000407101	0.00727262	0.00530938	2171/348/1382/948/5468/2167	6
178	SPP1_Mac	GO:0030730	sequestering of triglyceride	3/156	18/18870	0.00041284	0.00729273	0.00532406	4023/54209/5468	3
179	SPP1_Mac	GO:0033194	response to hydroperoxide	3/156	18/18870	0.00041284	0.00729273	0.00532406	4257/948/2876	3
180	SPP1_Mac	GO:0042742	defense response to bacterium	10/156	330/18870	0.000430225	0.00745659	0.00544369	4069/6280/54209/6556/948/2207/3606/56833/2268/10417	10
181	SPP1_Mac	GO:0014002	astrocyte development	4/156	43/18870	0.000431548	0.00745659	0.00544369	6280/54209/7431/3459	4
182	SPP1_Mac	GO:0055090	acylglycerol homeostasis	4/156	43/18870	0.000431548	0.00745659	0.00544369	4023/348/10062/3606	4
183	SPP1_Mac	GO:0070328	triglyceride homeostasis	4/156	43/18870	0.000431548	0.00745659	0.00544369	4023/348/10062/3606	4
184	SPP1_Mac	GO:0071346	cellular response to type II interferon	6/156	120/18870	0.000487796	0.00838267	0.00611977	2934/7431/7791/10062/3459/5468	6
185	SPP1_Mac	GO:0010810	regulation of cell-substrate adhesion	8/156	220/18870	0.000497869	0.00850952	0.00621238	8829/5880/948/3675/3987/3655/2316/811	8
186	SPP1_Mac	GO:1990845	adaptive thermogenesis	7/156	168/18870	0.000501476	0.00852509	0.00622375	2171/3988/948/10062/3606/7351/2167	7
187	SPP1_Mac	GO:0062012	regulation of small molecule metabolic process	10/156	337/18870	0.000506761	0.00856887	0.00625571	2203/2171/54209/348/7114/4199/10062/341/978/5468	10
188	SPP1_Mac	GO:0002437	inflammatory response to antigenic stimulus	5/156	80/18870	0.000528534	0.00888949	0.00648978	54209/3557/2/2876/2268	5
189	SPP1_Mac	GO:0001959	regulation of cytokine-mediated signaling pathway	7/156	171/18870	0.000557329	0.0092188	0.0067302	54209/3557/7805/10062/25939/1893/5468	7
190	SPP1_Mac	GO:0051897	positive regulation of phosphatidylinositol 3-kinase/protein kinase B signal transduction	7/156	171/18870	0.000557329	0.0092188	0.0067302	1116/54209/10870/3606/2876/2268/2022	7
191	SPP1_Mac	GO:0043299	leukocyte degranulation	5/156	81/18870	0.000559593	0.0092188	0.0067302	3689/5880/6688/3684/2268	5
192	SPP1_Mac	GO:0042789	mRNA transcription by RNA polymerase II	4/156	46/18870	0.000559776	0.0092188	0.0067302	302/10062/2316/5468	4
193	SPP1_Mac	GO:0042953	lipoprotein transport	3/156	20/18870	0.000569807	0.00928726	0.00678018	4481/948/5468	3
194	SPP1_Mac	GO:1900221	regulation of amyloid-beta clearance	3/156	20/18870	0.000569807	0.00928726	0.00678018	54209/348/3459	3
195	SPP1_Mac	GO:1903034	regulation of response to wounding	7/156	173/18870	0.000597237	0.00968443	0.00707013	6696/348/302/948/928/5329/2316	7
196	SPP1_Mac	GO:0006690	icosanoid metabolic process	6/156	125/18870	0.000605603	0.00976998	0.00713259	2171/1545/2876/4048/4259/2681	6
197	SPP1_Mac	GO:0061448	connective tissue development	9/156	285/18870	0.000621344	0.00997305	0.00728084	1116/4023/3988/960/9462/1893/6688/5468/7045	9
198	SPP1_Mac	GO:0031214	biomineral tissue development	7/156	175/18870	0.000639385	0.010102	0.00737497	6696/6546/29887/1893/5552/2268/10312	7
199	SPP1_Mac	GO:0071560	cellular response to transforming growth factor beta stimulus	9/156	287/18870	0.000653138	0.010102	0.00737497	81501/3675/7791/3693/3987/10370/6688/2022/5468	9
200	SPP1_Mac	GO:0031349	positive regulation of defense response	12/156	480/18870	0.000658163	0.010102	0.00737497	4023/6280/54209/4332/948/3957/10062/3606/23765/283131/6688/2167	12
201	SPP1_Mac	GO:0043086	negative regulation of catalytic activity	12/156	480/18870	0.000658163	0.010102	0.00737497	4318/348/6546/1476/2644/960/1893/2876/341/5329/5468/7078	12
202	SPP1_Mac	GO:0051099	positive regulation of binding	6/156	127/18870	0.000658467	0.010102	0.00737497	4318/348/8829/302/5329/5468	6
203	SPP1_Mac	GO:0030195	negative regulation of blood coagulation	4/156	48/18870	0.000658979	0.010102	0.00737497	348/302/928/5329	4
204	SPP1_Mac	GO:0002888	positive regulation of myeloid leukocyte mediated immunity	3/156	21/18870	0.000660757	0.010102	0.00737497	3689/6688/3684	3
205	SPP1_Mac	GO:0019370	leukotriene biosynthetic process	3/156	21/18870	0.000660757	0.010102	0.00737497	4048/4259/2681	3
206	SPP1_Mac	GO:0044872	lipoprotein localization	3/156	21/18870	0.000660757	0.010102	0.00737497	4481/948/5468	3
207	SPP1_Mac	GO:0010634	positive regulation of epithelial cell migration	7/156	176/18870	0.000661326	0.010102	0.00737497	6678/4318/8829/7114/152007/3675/811	7
208	SPP1_Mac	GO:0009743	response to carbohydrate	8/156	230/18870	0.000666768	0.0101362	0.00739991	2203/4023/54209/10628/9462/4199/2876/7351	8
209	SPP1_Mac	GO:0045785	positive regulation of cell adhesion	12/156	482/18870	0.000682539	0.0103263	0.0075387	3689/8829/960/948/3675/3606/3987/10370/5329/3655/2316/811	12
210	SPP1_Mac	GO:0050808	synapse organization	12/156	483/18870	0.000695009	0.0104649	0.00763987	54209/348/8829/2239/50807/3675/23768/5552/87/91752/3684/2316	12
211	SPP1_Mac	GO:1901136	carbohydrate derivative catabolic process	7/156	178/18870	0.000706999	0.0104858	0.00765513	1116/1118/960/25939/978/1514/2760	7
212	SPP1_Mac	GO:0001774	microglial cell activation	4/156	49/18870	0.000712978	0.0104858	0.00765513	54209/3689/3459/3684	4
213	SPP1_Mac	GO:0006140	regulation of nucleotide metabolic process	4/156	49/18870	0.000712978	0.0104858	0.00765513	54209/7114/4199/978	4
214	SPP1_Mac	GO:0010543	regulation of platelet activation	4/156	49/18870	0.000712978	0.0104858	0.00765513	348/928/2207/2316	4
215	SPP1_Mac	GO:1900047	negative regulation of hemostasis	4/156	49/18870	0.000712978	0.0104858	0.00765513	348/302/928/5329	4
216	SPP1_Mac	GO:0071559	response to transforming growth factor beta	9/156	293/18870	0.000756598	0.0109639	0.00800418	81501/3675/7791/3693/3987/10370/6688/2022/5468	9
217	SPP1_Mac	GO:0010888	negative regulation of lipid storage	3/156	22/18870	0.000760465	0.0109639	0.00800418	54209/10062/5468	3
218	SPP1_Mac	GO:0030449	regulation of complement activation	3/156	22/18870	0.000760465	0.0109639	0.00800418	54209/2/11326	3
219	SPP1_Mac	GO:0045861	negative regulation of proteolysis	8/156	235/18870	0.000767067	0.0109639	0.00800418	4318/1476/960/10062/1893/2876/5329/7078	8
220	SPP1_Mac	GO:0009299	mRNA transcription	4/156	50/18870	0.000770034	0.0109639	0.00800418	302/10062/2316/5468	4
221	SPP1_Mac	GO:0071320	cellular response to cAMP	4/156	50/18870	0.000770034	0.0109639	0.00800418	2203/2230/366/1545	4
222	SPP1_Mac	GO:0010232	vascular transport	5/156	87/18870	0.000775635	0.0109639	0.00800418	2171/348/948/8714/6507	5
223	SPP1_Mac	GO:0150104	transport across blood-brain barrier	5/156	87/18870	0.000775635	0.0109639	0.00800418	2171/348/948/8714/6507	5
224	SPP1_Mac	GO:0043534	blood vessel endothelial cell migration	7/156	181/18870	0.000780161	0.0109639	0.00800418	28984/348/8829/7114/1545/2876/5468	7
225	SPP1_Mac	GO:1905475	regulation of protein localization to membrane	7/156	181/18870	0.000780161	0.0109639	0.00800418	2934/54209/3689/2239/3675/8650/3684	7
226	SPP1_Mac	GO:0007264	small GTPase mediated signal transduction	12/156	491/18870	0.000801825	0.0112185	0.00819005	2203/348/1795/8829/5880/55704/23362/3988/3675/121512/57698/389	12
227	SPP1_Mac	GO:0051496	positive regulation of stress fiber assembly	4/156	51/18870	0.000830242	0.0114499	0.00835902	28984/8829/55704/389	4
228	SPP1_Mac	GO:0001659	temperature homeostasis	7/156	183/18870	0.000832174	0.0114499	0.00835902	2171/948/10062/3606/2876/7351/2167	7
229	SPP1_Mac	GO:0060759	regulation of response to cytokine stimulus	7/156	183/18870	0.000832174	0.0114499	0.00835902	54209/3557/7805/10062/25939/1893/5468	7
230	SPP1_Mac	GO:0071356	cellular response to tumor necrosis factor	8/156	238/18870	0.000832852	0.0114499	0.00835902	1116/81501/7114/7805/1545/3987/4217/2167	8
231	SPP1_Mac	GO:0043171	peptide catabolic process	3/156	23/18870	0.000869253	0.0118986	0.00868659	10404/4048/290	3
232	SPP1_Mac	GO:0030595	leukocyte chemotaxis	8/156	240/18870	0.000879175	0.011974	0.00874164	6280/3689/5880/2207/23765/56833/6688/811	8
233	SPP1_Mac	GO:0002269	leukocyte activation involved in inflammatory response	4/156	52/18870	0.000893696	0.011974	0.00874164	54209/3689/3459/3684	4
234	SPP1_Mac	GO:0006968	cellular defense response	4/156	52/18870	0.000893696	0.011974	0.00874164	4332/4046/4688/10312	4
235	SPP1_Mac	GO:0043154	negative regulation of cysteine-type endopeptidase activity involved in apoptotic process	4/156	52/18870	0.000893696	0.011974	0.00874164	4318/960/2876/5329	4
236	SPP1_Mac	GO:0050819	negative regulation of coagulation	4/156	52/18870	0.000893696	0.011974	0.00874164	348/302/928/5329	4
237	SPP1_Mac	GO:0042445	hormone metabolic process	8/156	241/18870	0.0009031	0.012049	0.00879635	6696/2230/1382/1508/1545/10159/10404/1514	8
238	SPP1_Mac	GO:0007565	female pregnancy	7/156	186/18870	0.000915292	0.0121603	0.00887764	6696/4318/1508/3675/7351/10370/811	7
239	SPP1_Mac	GO:0035357	peroxisome proliferator activated receptor signaling pathway	3/156	24/18870	0.000987435	0.0130095	0.00949756	2171/10370/5468	3
240	SPP1_Mac	GO:0060907	positive regulation of macrophage cytokine production	3/156	24/18870	0.000987435	0.0130095	0.00949756	7805/948/10417	3
241	SPP1_Mac	GO:0010874	regulation of cholesterol efflux	4/156	54/18870	0.00103072	0.0134828	0.00984312	54209/348/10062/5468	4
242	SPP1_Mac	GO:0017157	regulation of exocytosis	7/156	190/18870	0.00103615	0.0134828	0.00984312	3689/5880/302/5872/6688/3684/2268	7
243	SPP1_Mac	GO:2001242	regulation of intrinsic apoptotic signaling pathway	7/156	190/18870	0.00103615	0.0134828	0.00984312	4318/6280/54209/10134/960/2876/5329	7
244	SPP1_Mac	GO:0045185	maintenance of protein location	5/156	93/18870	0.00104859	0.0135887	0.00992041	2934/55704/7114/5552/2316	5
245	SPP1_Mac	GO:0031099	regeneration	7/156	191/18870	0.00106825	0.0137869	0.0100651	6696/928/3936/10404/2876/7351/2316	7
246	SPP1_Mac	GO:0051896	regulation of phosphatidylinositol 3-kinase/protein kinase B signal transduction	8/156	248/18870	0.0010856	0.0139539	0.0101871	1116/54209/10870/3606/2876/23612/2268/2022	8
247	SPP1_Mac	GO:0051452	intracellular pH reduction	4/156	55/18870	0.00110448	0.0141392	0.0103223	6556/10159/56833/10312	4
248	SPP1_Mac	GO:0043302	positive regulation of leukocyte degranulation	3/156	25/18870	0.00111531	0.0141631	0.0103398	3689/3684/2268	3
249	SPP1_Mac	GO:0046697	decidualization	3/156	25/18870	0.00111531	0.0141631	0.0103398	6696/1508/10370	3
250	SPP1_Mac	GO:0001836	release of cytochrome c from mitochondria	4/156	56/18870	0.00118187	0.0148887	0.0108695	4318/597/2876/5329	4
251	SPP1_Mac	GO:0050832	defense response to fungus	4/156	56/18870	0.00118187	0.0148887	0.0108695	6280/23765/6688/10417	4
252	SPP1_Mac	GO:0002407	dendritic cell chemotaxis	3/156	26/18870	0.00125318	0.0155814	0.0113752	56833/6688/811	3
253	SPP1_Mac	GO:0032967	positive regulation of collagen biosynthetic process	3/156	26/18870	0.00125318	0.0155814	0.0113752	28984/7431/2022	3
254	SPP1_Mac	GO:0060333	type II interferon-mediated signaling pathway	3/156	26/18870	0.00125318	0.0155814	0.0113752	10062/3459/5468	3
255	SPP1_Mac	GO:0043113	receptor clustering	4/156	57/18870	0.00126298	0.0155814	0.0113752	2934/3689/348/2316	4
256	SPP1_Mac	GO:0061900	glial cell activation	4/156	57/18870	0.00126298	0.0155814	0.0113752	54209/3689/3459/3684	4
257	SPP1_Mac	GO:1903035	negative regulation of response to wounding	5/156	97/18870	0.00126642	0.0155814	0.0113752	6696/348/302/928/5329	5
258	SPP1_Mac	GO:0050921	positive regulation of chemotaxis	6/156	145/18870	0.00131152	0.0160737	0.0117346	54209/8829/5880/7114/6688/811	6
259	SPP1_Mac	GO:0071248	cellular response to metal ion	7/156	200/18870	0.00139361	0.0168479	0.0122999	2203/4318/1536/6556/7351/811/2167	7
260	SPP1_Mac	GO:0006959	humoral immune response	8/156	258/18870	0.00139629	0.0168479	0.0122999	4069/6280/54209/28984/2/6556/11326/10417	8
261	SPP1_Mac	GO:0010714	positive regulation of collagen metabolic process	3/156	27/18870	0.00140133	0.0168479	0.0122999	28984/7431/2022	3
262	SPP1_Mac	GO:0010884	positive regulation of lipid storage	3/156	27/18870	0.00140133	0.0168479	0.0122999	4023/4481/948	3
263	SPP1_Mac	GO:0045742	positive regulation of epidermal growth factor receptor signaling pathway	3/156	27/18870	0.00140133	0.0168479	0.0122999	4318/55704/5329	3
264	SPP1_Mac	GO:0034612	response to tumor necrosis factor	8/156	259/18870	0.00143088	0.0170147	0.0124216	1116/81501/7114/7805/1545/3987/4217/2167	8
265	SPP1_Mac	GO:0030198	extracellular matrix organization	9/156	321/18870	0.0014313	0.0170147	0.0124216	4318/28984/302/1545/23768/4643/3936/2022/7045	9
266	SPP1_Mac	GO:0031638	zymogen activation	4/156	59/18870	0.00143672	0.0170147	0.0124216	302/444/5329/1514	4
267	SPP1_Mac	GO:0060135	maternal process involved in female pregnancy	4/156	59/18870	0.00143672	0.0170147	0.0124216	6696/1508/3675/10370	4
268	SPP1_Mac	GO:0042632	cholesterol homeostasis	5/156	100/18870	0.0014505	0.0171137	0.0124939	4023/348/10062/3606/2167	5
269	SPP1_Mac	GO:0043062	extracellular structure organization	9/156	322/18870	0.00146225	0.0171883	0.0125483	4318/28984/302/1545/23768/4643/3936/2022/7045	9
270	SPP1_Mac	GO:0001935	endothelial cell proliferation	7/156	202/18870	0.00147544	0.0172153	0.012568	6678/28984/348/8829/3988/1893/5468	7
271	SPP1_Mac	GO:0050728	negative regulation of inflammatory response	7/156	202/18870	0.00147544	0.0172153	0.012568	54209/348/10062/56833/2876/2268/5468	7
272	SPP1_Mac	GO:0045229	external encapsulating structure organization	9/156	323/18870	0.00149374	0.0173648	0.0126772	4318/28984/302/1545/23768/4643/3936/2022/7045	9
273	SPP1_Mac	GO:1902903	regulation of supramolecular fiber organization	10/156	389/18870	0.00150595	0.0174315	0.0127259	2934/54209/28984/348/8829/55704/7114/2876/2316/389	10
274	SPP1_Mac	GO:0055092	sterol homeostasis	5/156	101/18870	0.00151602	0.0174315	0.0127259	4023/348/10062/3606/2167	5
275	SPP1_Mac	GO:0120162	positive regulation of cold-induced thermogenesis	5/156	101/18870	0.00151602	0.0174315	0.0127259	2171/948/3606/7351/2167	5
276	SPP1_Mac	GO:0120161	regulation of cold-induced thermogenesis	6/156	150/18870	0.00155968	0.017808	0.0130007	2171/948/10062/3606/7351/2167	6
277	SPP1_Mac	GO:0032801	receptor catabolic process	3/156	28/18870	0.00156003	0.017808	0.0130007	348/302/7805	3
278	SPP1_Mac	GO:0106106	cold-induced thermogenesis	6/156	151/18870	0.00161333	0.0182374	0.0133142	2171/948/10062/3606/7351/2167	6
279	SPP1_Mac	GO:0032092	positive regulation of protein binding	4/156	61/18870	0.00162648	0.0182374	0.0133142	4318/348/8829/302	4
280	SPP1_Mac	GO:0034113	heterotypic cell-cell adhesion	4/156	61/18870	0.00162648	0.0182374	0.0133142	3689/3557/960/3687	4
281	SPP1_Mac	GO:0046456	icosanoid biosynthetic process	4/156	61/18870	0.00162648	0.0182374	0.0133142	2171/4048/4259/2681	4
282	SPP1_Mac	GO:1900024	regulation of substrate adhesion-dependent cell spreading	4/156	61/18870	0.00162648	0.0182374	0.0133142	8829/3987/2316/811	4
283	SPP1_Mac	GO:0044703	multi-organism reproductive process	7/156	206/18870	0.00165033	0.0184394	0.0134617	6696/4318/1508/3675/7351/10370/811	7
284	SPP1_Mac	GO:0006910	phagocytosis, recognition	3/156	29/18870	0.00172955	0.0191889	0.0140089	54209/948/10417	3
285	SPP1_Mac	GO:1901186	positive regulation of ERBB signaling pathway	3/156	29/18870	0.00172955	0.0191889	0.0140089	4318/55704/5329	3
286	SPP1_Mac	GO:0055074	calcium ion homeostasis	9/156	331/18870	0.00176583	0.0195229	0.0142527	348/6546/808/10134/29887/64072/2316/10312/811	9
287	SPP1_Mac	GO:0008037	cell recognition	6/156	154/18870	0.00178272	0.019641	0.0143389	54209/8829/948/928/10417/23022	6
288	SPP1_Mac	GO:0051051	negative regulation of transport	11/156	469/18870	0.00183005	0.0198491	0.0144909	2171/4318/348/302/808/948/10062/341/7351/6688/8682	11
289	SPP1_Mac	GO:0000768	syncytium formation by plasma membrane fusion	4/156	63/18870	0.001833	0.0198491	0.0144909	54209/81501/928/51177	4
290	SPP1_Mac	GO:0008631	intrinsic apoptotic signaling pathway in response to oxidative stress	4/156	63/18870	0.001833	0.0198491	0.0144909	54209/1545/2876/4217	4
291	SPP1_Mac	GO:0021545	cranial nerve development	4/156	63/18870	0.001833	0.0198491	0.0144909	8829/6507/10370/10312	4
292	SPP1_Mac	GO:0140253	cell-cell fusion	4/156	63/18870	0.001833	0.0198491	0.0144909	54209/81501/928/51177	4
293	SPP1_Mac	GO:0002532	production of molecular mediator involved in inflammatory response	5/156	106/18870	0.00187679	0.0201154	0.0146852	54209/3988/948/23765/56833	5
294	SPP1_Mac	GO:0032760	positive regulation of tumor necrosis factor production	5/156	106/18870	0.00187679	0.0201154	0.0146852	4023/1536/948/3459/10417	5
295	SPP1_Mac	GO:0016042	lipid catabolic process	9/156	334/18870	0.00187756	0.0201154	0.0146852	6696/4023/348/3988/1545/57552/341/79887/2760	9
296	SPP1_Mac	GO:0006631	fatty acid metabolic process	10/156	401/18870	0.00188303	0.0201154	0.0146852	2171/4023/3988/948/1545/10062/2876/341/4259/5468	10
297	SPP1_Mac	GO:0046718	viral entry into host cell	6/156	156/18870	0.00190293	0.0201915	0.0147408	2934/8829/1508/3693/290/1514	6
298	SPP1_Mac	GO:0097530	granulocyte migration	6/156	156/18870	0.00190293	0.0201915	0.0147408	6280/3689/5880/2207/23765/56833	6
299	SPP1_Mac	GO:0060142	regulation of syncytium formation by plasma membrane fusion	3/156	30/18870	0.00191015	0.0202003	0.0147472	54209/81501/51177	3
300	SPP1_Mac	GO:0032231	regulation of actin filament bundle assembly	5/156	107/18870	0.00195587	0.0206148	0.0150499	28984/8829/55704/2316/389	5
301	SPP1_Mac	GO:0009612	response to mechanical stimulus	7/156	213/18870	0.00199482	0.0208869	0.0152485	1116/2934/6546/10628/6507/10370/2022	7
302	SPP1_Mac	GO:0033674	positive regulation of kinase activity	9/156	337/18870	0.00199489	0.0208869	0.0152485	1116/54209/28984/55704/6556/808/3606/2268/4217	9
303	SPP1_Mac	GO:0032507	maintenance of protein location in cell	4/156	65/18870	0.00205702	0.0213957	0.01562	2934/55704/7114/5552	4
304	SPP1_Mac	GO:2000117	negative regulation of cysteine-type endopeptidase activity	4/156	65/18870	0.00205702	0.0213957	0.01562	4318/960/2876/5329	4
305	SPP1_Mac	GO:0035767	endothelial cell chemotaxis	3/156	31/18870	0.00210207	0.0217214	0.0158577	8829/7114/5872	3
306	SPP1_Mac	GO:0090322	regulation of superoxide metabolic process	3/156	31/18870	0.00210207	0.0217214	0.0158577	3689/948/3684	3
307	SPP1_Mac	GO:0061387	regulation of extent of cell growth	5/156	109/18870	0.0021213	0.0218487	0.0159507	6696/348/8829/1382/57698	5
308	SPP1_Mac	GO:0044706	multi-multicellular organism process	7/156	216/18870	0.00215846	0.0221593	0.0161774	6696/4318/1508/3675/7351/10370/811	7
309	SPP1_Mac	GO:1905953	negative regulation of lipid localization	4/156	66/18870	0.00217582	0.0222652	0.0162547	54209/10062/341/5468	4
310	SPP1_Mac	GO:1903557	positive regulation of tumor necrosis factor superfamily cytokine production	5/156	110/18870	0.00220775	0.022519	0.01644	4023/1536/948/3459/10417	5
311	SPP1_Mac	GO:0070374	positive regulation of ERK1 and ERK2 cascade	7/156	218/18870	0.0022732	0.0229348	0.0167435	1116/54209/348/8829/960/152007/948	7
312	SPP1_Mac	GO:0001894	tissue homeostasis	8/156	279/18870	0.00227818	0.0229348	0.0167435	6696/4069/5880/81501/3988/29887/64072/10312	8
313	SPP1_Mac	GO:0060249	anatomical structure homeostasis	8/156	279/18870	0.00227818	0.0229348	0.0167435	6696/4069/5880/81501/3988/29887/64072/10312	8
314	SPP1_Mac	GO:0098742	cell-cell adhesion via plasma-membrane adhesion molecules	8/156	279/18870	0.00227818	0.0229348	0.0167435	214/3689/3557/2239/3675/64072/3684/23022	8
315	SPP1_Mac	GO:0006949	syncytium formation	4/156	67/18870	0.00229928	0.0229348	0.0167435	54209/81501/928/51177	4
316	SPP1_Mac	GO:0006956	complement activation	4/156	67/18870	0.00229928	0.0229348	0.0167435	54209/28984/2/11326	4
317	SPP1_Mac	GO:0009620	response to fungus	4/156	67/18870	0.00229928	0.0229348	0.0167435	6280/23765/6688/10417	4
318	SPP1_Mac	GO:0044409	entry into host	6/156	163/18870	0.00237252	0.0235343	0.0171813	2934/8829/1508/3693/290/1514	6
319	SPP1_Mac	GO:0051347	positive regulation of transferase activity	10/156	414/18870	0.00237427	0.0235343	0.0171813	1116/54209/28984/348/55704/6556/808/3606/2268/4217	10
320	SPP1_Mac	GO:2000379	positive regulation of reactive oxygen species metabolic process	4/156	68/18870	0.00242747	0.0239865	0.0175114	3689/948/1545/3684	4
321	SPP1_Mac	GO:0032496	response to lipopolysaccharide	9/156	348/18870	0.00247618	0.0243761	0.0177958	4318/6280/54209/7431/6556/948/10062/6688/10417	9
322	SPP1_Mac	GO:0032355	response to estradiol	5/156	113/18870	0.00248249	0.0243761	0.0177958	10628/10095/1545/2876/811	5
323	SPP1_Mac	GO:0001558	regulation of cell growth	10/156	417/18870	0.00250112	0.0243761	0.0177958	6696/2203/6280/348/8829/81501/1382/694/978/57698	10
324	SPP1_Mac	GO:0002862	negative regulation of inflammatory response to antigenic stimulus	3/156	33/18870	0.00252087	0.0243761	0.0177958	54209/2876/2268	3
325	SPP1_Mac	GO:0034368	protein-lipid complex remodeling	3/156	33/18870	0.00252087	0.0243761	0.0177958	4023/348/341	3
326	SPP1_Mac	GO:0034369	plasma lipoprotein particle remodeling	3/156	33/18870	0.00252087	0.0243761	0.0177958	4023/348/341	3
327	SPP1_Mac	GO:0036336	dendritic cell migration	3/156	33/18870	0.00252087	0.0243761	0.0177958	56833/6688/811	3
328	SPP1_Mac	GO:0018958	phenol-containing compound metabolic process	5/156	114/18870	0.00257935	0.0248655	0.0181531	3689/1508/126321/10404/3684	5
329	SPP1_Mac	GO:0007596	blood coagulation	7/156	224/18870	0.00264585	0.0254291	0.0185646	348/302/948/928/2207/5329/2316	7
330	SPP1_Mac	GO:0043473	pigmentation	5/156	115/18870	0.00267892	0.025669	0.0187397	348/55686/4286/10159/126321	5
331	SPP1_Mac	GO:0022407	regulation of cell-cell adhesion	11/156	493/18870	0.00269314	0.0257272	0.0187822	3689/28984/3557/960/7805/928/3606/11326/10370/5329/6688	11
332	SPP1_Mac	GO:0006026	aminoglycan catabolic process	3/156	34/18870	0.0027482	0.0260174	0.018994	1116/1118/960	3
333	SPP1_Mac	GO:0006691	leukotriene metabolic process	3/156	34/18870	0.0027482	0.0260174	0.018994	4048/4259/2681	3
334	SPP1_Mac	GO:0007035	vacuolar acidification	3/156	34/18870	0.0027482	0.0260174	0.018994	6556/10159/10312	3
335	SPP1_Mac	GO:1903532	positive regulation of secretion by cell	8/156	288/18870	0.00276926	0.0260188	0.018995	6696/54209/3689/28984/302/3684/2268/5468	8
336	SPP1_Mac	GO:0040013	negative regulation of locomotion	10/156	423/18870	0.00277115	0.0260188	0.018995	28984/348/8829/4286/1545/56833/10370/2022/811/5468	10
337	SPP1_Mac	GO:0033157	regulation of intracellular protein transport	7/156	226/18870	0.00277997	0.0260188	0.018995	3689/5880/10134/948/3936/3684/2316	7
338	SPP1_Mac	GO:0019882	antigen processing and presentation	5/156	116/18870	0.00278126	0.0260188	0.018995	54209/6556/2207/1514/811	5
339	SPP1_Mac	GO:1903317	regulation of protein maturation	4/156	71/18870	0.00284142	0.0264165	0.0192854	2934/302/9462/5329	4
340	SPP1_Mac	GO:0016049	cell growth	11/156	497/18870	0.00286468	0.0264165	0.0192854	6696/2203/6280/214/348/8829/81501/1382/694/978/57698	11
341	SPP1_Mac	GO:0043491	phosphatidylinositol 3-kinase/protein kinase B signal transduction	8/156	290/18870	0.00288886	0.0264165	0.0192854	1116/54209/10870/3606/2876/23612/2268/2022	8
342	SPP1_Mac	GO:0007009	plasma membrane organization	6/156	170/18870	0.00292451	0.0264165	0.0192854	6280/2934/302/50807/928/26509	6
343	SPP1_Mac	GO:0061299	retina vasculature morphogenesis in camera-type eye	2/156	10/18870	0.00292573	0.0264165	0.0192854	8829/1545	2
344	SPP1_Mac	GO:0070391	response to lipoteichoic acid	2/156	10/18870	0.00292573	0.0264165	0.0192854	54209/948	2
345	SPP1_Mac	GO:0071223	cellular response to lipoteichoic acid	2/156	10/18870	0.00292573	0.0264165	0.0192854	54209/948	2
346	SPP1_Mac	GO:1904179	positive regulation of adipose tissue development	2/156	10/18870	0.00292573	0.0264165	0.0192854	4023/5468	2
347	SPP1_Mac	GO:2000510	positive regulation of dendritic cell chemotaxis	2/156	10/18870	0.00292573	0.0264165	0.0192854	6688/811	2
348	SPP1_Mac	GO:0001893	maternal placenta development	3/156	35/18870	0.00298777	0.0264165	0.0192854	6696/1508/10370	3
349	SPP1_Mac	GO:0002021	response to dietary excess	3/156	35/18870	0.00298777	0.0264165	0.0192854	348/3988/9462	3
350	SPP1_Mac	GO:0002446	neutrophil mediated immunity	3/156	35/18870	0.00298777	0.0264165	0.0192854	3689/6688/3684	3
351	SPP1_Mac	GO:0002495	antigen processing and presentation of peptide antigen via MHC class II	3/156	35/18870	0.00298777	0.0264165	0.0192854	54209/2207/1514	3
352	SPP1_Mac	GO:0034367	protein-containing complex remodeling	3/156	35/18870	0.00298777	0.0264165	0.0192854	4023/348/341	3
353	SPP1_Mac	GO:0061081	positive regulation of myeloid leukocyte cytokine production involved in immune response	3/156	35/18870	0.00298777	0.0264165	0.0192854	7805/948/10417	3
354	SPP1_Mac	GO:0043954	cellular component maintenance	4/156	72/18870	0.00298948	0.0264165	0.0192854	54209/348/3675/91752	4
355	SPP1_Mac	GO:0007179	transforming growth factor beta receptor signaling pathway	7/156	229/18870	0.00299086	0.0264165	0.0192854	3675/7791/3693/10370/6688/2022/5468	7
356	SPP1_Mac	GO:0050817	coagulation	7/156	229/18870	0.00299086	0.0264165	0.0192854	348/302/948/928/2207/5329/2316	7
357	SPP1_Mac	GO:0071241	cellular response to inorganic substance	7/156	229/18870	0.00299086	0.0264165	0.0192854	2203/4318/1536/6556/7351/811/2167	7
358	SPP1_Mac	GO:0097191	extrinsic apoptotic signaling pathway	7/156	229/18870	0.00299086	0.0264165	0.0192854	8829/597/2876/6688/3655/8682/7078	7
359	SPP1_Mac	GO:0002685	regulation of leukocyte migration	7/156	230/18870	0.00306381	0.0269854	0.0197007	54209/5880/928/1893/56833/6688/811	7
360	SPP1_Mac	GO:0007599	hemostasis	7/156	231/18870	0.00313812	0.0274868	0.0200668	348/302/948/928/2207/5329/2316	7
361	SPP1_Mac	GO:0010594	regulation of endothelial cell migration	7/156	231/18870	0.00313812	0.0274868	0.0200668	6678/28984/348/8829/7114/811/5468	7
362	SPP1_Mac	GO:0050920	regulation of chemotaxis	7/156	232/18870	0.0032138	0.0280719	0.0204939	54209/8829/5880/7114/56833/6688/811	7
363	SPP1_Mac	GO:0010984	regulation of lipoprotein particle clearance	3/156	36/18870	0.0032398	0.0282211	0.0206028	54209/302/341	3
364	SPP1_Mac	GO:0061045	negative regulation of wound healing	4/156	75/18870	0.00346515	0.0299492	0.0218644	348/302/928/5329	4
365	SPP1_Mac	GO:0002504	antigen processing and presentation of peptide or polysaccharide antigen via MHC class II	3/156	37/18870	0.00350449	0.0299492	0.0218644	54209/2207/1514	3
366	SPP1_Mac	GO:0010934	macrophage cytokine production	3/156	37/18870	0.00350449	0.0299492	0.0218644	7805/948/10417	3
367	SPP1_Mac	GO:0010935	regulation of macrophage cytokine production	3/156	37/18870	0.00350449	0.0299492	0.0218644	7805/948/10417	3
368	SPP1_Mac	GO:0044319	wound healing, spreading of cells	3/156	37/18870	0.00350449	0.0299492	0.0218644	960/2316/389	3
369	SPP1_Mac	GO:0071276	cellular response to cadmium ion	3/156	37/18870	0.00350449	0.0299492	0.0218644	4318/1536/6556	3
370	SPP1_Mac	GO:0090505	epiboly involved in wound healing	3/156	37/18870	0.00350449	0.0299492	0.0218644	960/2316/389	3
371	SPP1_Mac	GO:0010986	positive regulation of lipoprotein particle clearance	2/156	11/18870	0.00355654	0.0300689	0.0219518	54209/302	2
372	SPP1_Mac	GO:0042989	sequestering of actin monomers	2/156	11/18870	0.00355654	0.0300689	0.0219518	2934/7114	2
373	SPP1_Mac	GO:0070778	L-aspartate transmembrane transport	2/156	11/18870	0.00355654	0.0300689	0.0219518	6507/7351	2
374	SPP1_Mac	GO:2001171	positive regulation of ATP biosynthetic process	2/156	11/18870	0.00355654	0.0300689	0.0219518	54209/7114	2
375	SPP1_Mac	GO:0030282	bone mineralization	5/156	123/18870	0.00357849	0.0301738	0.0220284	6546/29887/1893/5552/2268	5
376	SPP1_Mac	GO:0002237	response to molecule of bacterial origin	9/156	369/18870	0.00364874	0.0306843	0.0224011	4318/6280/54209/7431/6556/948/10062/6688/10417	9
377	SPP1_Mac	GO:0002761	regulation of myeloid leukocyte differentiation	5/156	124/18870	0.00370445	0.0310702	0.0226829	54209/81501/4286/84293/2124	5
378	SPP1_Mac	GO:0032965	regulation of collagen biosynthetic process	3/156	38/18870	0.00378203	0.0314815	0.0229831	28984/7431/2022	3
379	SPP1_Mac	GO:0090504	epiboly	3/156	38/18870	0.00378203	0.0314815	0.0229831	960/2316/389	3
380	SPP1_Mac	GO:0071219	cellular response to molecule of bacterial origin	7/156	239/18870	0.00378336	0.0314815	0.0229831	4318/54209/7431/948/10062/6688/10417	7
381	SPP1_Mac	GO:0001937	negative regulation of endothelial cell proliferation	4/156	77/18870	0.00380936	0.0316147	0.0230803	6678/28984/348/5468	4
382	SPP1_Mac	GO:0030336	negative regulation of cell migration	9/156	373/18870	0.00391477	0.0324044	0.0236569	28984/348/4286/1545/56833/10370/2022/811/5468	9
383	SPP1_Mac	GO:0001936	regulation of endothelial cell proliferation	6/156	181/18870	0.00397906	0.0326837	0.0238608	6678/28984/348/8829/1893/5468	6
384	SPP1_Mac	GO:1901653	cellular response to peptide	9/156	374/18870	0.00398359	0.0326837	0.0238608	2203/54209/7431/948/1545/5872/11031/7351/5468	9
385	SPP1_Mac	GO:0045921	positive regulation of exocytosis	4/156	78/18870	0.00398985	0.0326837	0.0238608	3689/302/3684/2268	4
386	SPP1_Mac	GO:0097009	energy homeostasis	4/156	78/18870	0.00398985	0.0326837	0.0238608	348/3988/948/9462	4
387	SPP1_Mac	GO:1903305	regulation of regulated secretory pathway	5/156	127/18870	0.00410144	0.033511	0.0244647	3689/5880/6688/3684/2268	5
388	SPP1_Mac	GO:2001234	negative regulation of apoptotic signaling pathway	7/156	243/18870	0.00414156	0.0337139	0.0246128	4318/8829/960/2876/5329/3655/8682	7
389	SPP1_Mac	GO:0006874	intracellular calcium ion homeostasis	8/156	308/18870	0.00415601	0.0337139	0.0246128	348/6546/808/10134/64072/2316/10312/811	8
390	SPP1_Mac	GO:0007409	axonogenesis	10/156	448/18870	0.00415826	0.0337139	0.0246128	6696/214/348/8829/334/1382/23768/8650/57698/23022	10
391	SPP1_Mac	GO:0050807	regulation of synapse organization	7/156	244/18870	0.00423499	0.0338084	0.0246818	54209/348/2239/50807/23768/5552/91752	7
392	SPP1_Mac	GO:0010951	negative regulation of endopeptidase activity	5/156	128/18870	0.00424027	0.0338084	0.0246818	4318/960/2876/5329/7078	5
393	SPP1_Mac	GO:0034370	triglyceride-rich lipoprotein particle remodeling	2/156	12/18870	0.00424476	0.0338084	0.0246818	4023/348	2
394	SPP1_Mac	GO:0034372	very-low-density lipoprotein particle remodeling	2/156	12/18870	0.00424476	0.0338084	0.0246818	4023/348	2
395	SPP1_Mac	GO:0051238	sequestering of metal ion	2/156	12/18870	0.00424476	0.0338084	0.0246818	6280/2495	2
396	SPP1_Mac	GO:1903580	positive regulation of ATP metabolic process	2/156	12/18870	0.00424476	0.0338084	0.0246818	54209/7114	2
397	SPP1_Mac	GO:2001046	positive regulation of integrin-mediated signaling pathway	2/156	12/18870	0.00424476	0.0338084	0.0246818	3987/2316	2
398	SPP1_Mac	GO:0051495	positive regulation of cytoskeleton organization	6/156	184/18870	0.0043101	0.0342288	0.0249888	2934/28984/8829/55704/2316/389	6
399	SPP1_Mac	GO:0051047	positive regulation of secretion	8/156	310/18870	0.00431972	0.0342288	0.0249888	6696/54209/3689/28984/302/3684/2268/5468	8
400	SPP1_Mac	GO:0016485	protein processing	7/156	245/18870	0.00433002	0.0342288	0.0249888	2934/302/10159/444/5552/5329/1514	7
401	SPP1_Mac	GO:0048844	artery morphogenesis	4/156	80/18870	0.00436801	0.0343	0.0250408	348/8829/10370/2022	4
402	SPP1_Mac	GO:0097061	dendritic spine organization	4/156	80/18870	0.00436801	0.0343	0.0250408	54209/348/3675/91752	4
403	SPP1_Mac	GO:0032570	response to progesterone	3/156	40/18870	0.0043764	0.0343	0.0250408	10628/1545/10062	3
404	SPP1_Mac	GO:1990266	neutrophil migration	5/156	129/18870	0.00438242	0.0343	0.0250408	6280/3689/5880/2207/56833	5
405	SPP1_Mac	GO:0007162	negative regulation of cell adhesion	8/156	312/18870	0.00448835	0.0350424	0.0255827	28984/3557/7805/1545/928/11326/6688/7045	8
406	SPP1_Mac	GO:0045926	negative regulation of growth	7/156	247/18870	0.00452491	0.0351132	0.0256344	6696/2203/8829/81501/694/10370/978	7
407	SPP1_Mac	GO:0071621	granulocyte chemotaxis	5/156	130/18870	0.00452794	0.0351132	0.0256344	6280/3689/5880/2207/23765	5
408	SPP1_Mac	GO:0032640	tumor necrosis factor production	6/156	186/18870	0.00454183	0.0351132	0.0256344	4023/54209/1536/948/3459/10417	6
409	SPP1_Mac	GO:0032680	regulation of tumor necrosis factor production	6/156	186/18870	0.00454183	0.0351132	0.0256344	4023/54209/1536/948/3459/10417	6
410	SPP1_Mac	GO:0002720	positive regulation of cytokine production involved in immune response	4/156	81/18870	0.00456585	0.0351939	0.0256933	7805/948/3606/10417	4
411	SPP1_Mac	GO:0070372	regulation of ERK1 and ERK2 cascade	8/156	313/18870	0.00457454	0.0351939	0.0256933	1116/54209/348/8829/960/152007/948/7078	8
412	SPP1_Mac	GO:0043388	positive regulation of DNA binding	3/156	41/18870	0.00469359	0.035935	0.0262343	4318/5329/5468	3
413	SPP1_Mac	GO:0150077	regulation of neuroinflammatory response	3/156	41/18870	0.00469359	0.035935	0.0262343	4318/54209/3606	3
414	SPP1_Mac	GO:0002703	regulation of leukocyte mediated immunity	7/156	249/18870	0.00472636	0.0360985	0.0263537	54209/3689/5880/3606/6688/3684/2268	7
415	SPP1_Mac	GO:0044000	movement in host	6/156	188/18870	0.00478263	0.0364402	0.0266032	2934/8829/1508/3693/290/1514	6
416	SPP1_Mac	GO:0050803	regulation of synapse structure or activity	7/156	250/18870	0.00482959	0.0366896	0.0267853	54209/348/2239/50807/23768/5552/91752	7
417	SPP1_Mac	GO:0030308	negative regulation of cell growth	6/156	189/18870	0.00490649	0.0366896	0.0267853	6696/2203/8829/81501/694/978	6
418	SPP1_Mac	GO:0001570	vasculogenesis	4/156	83/18870	0.00497945	0.0366896	0.0267853	8829/4643/10370/2022	4
419	SPP1_Mac	GO:0030048	actin filament-based movement	5/156	133/18870	0.00498514	0.0366896	0.0267853	2934/4643/4542/2316/57698	5
420	SPP1_Mac	GO:0061041	regulation of wound healing	5/156	133/18870	0.00498514	0.0366896	0.0267853	348/302/948/928/5329	5
421	SPP1_Mac	GO:0002357	defense response to tumor cell	2/156	13/18870	0.00498941	0.0366896	0.0267853	7805/6688	2
422	SPP1_Mac	GO:0036006	cellular response to macrophage colony-stimulating factor stimulus	2/156	13/18870	0.00498941	0.0366896	0.0267853	54209/81501	2
423	SPP1_Mac	GO:0036462	TRAIL-activated apoptotic signaling pathway	2/156	13/18870	0.00498941	0.0366896	0.0267853	6688/7078	2
424	SPP1_Mac	GO:0045916	negative regulation of complement activation	2/156	13/18870	0.00498941	0.0366896	0.0267853	2/11326	2
425	SPP1_Mac	GO:0051764	actin crosslink formation	2/156	13/18870	0.00498941	0.0366896	0.0267853	3936/2316	2
426	SPP1_Mac	GO:0070278	extracellular matrix constituent secretion	2/156	13/18870	0.00498941	0.0366896	0.0267853	28984/2022	2
427	SPP1_Mac	GO:0071285	cellular response to lithium ion	2/156	13/18870	0.00498941	0.0366896	0.0267853	811/2167	2
428	SPP1_Mac	GO:0071801	regulation of podosome assembly	2/156	13/18870	0.00498941	0.0366896	0.0267853	2934/3936	2
429	SPP1_Mac	GO:1902950	regulation of dendritic spine maintenance	2/156	13/18870	0.00498941	0.0366896	0.0267853	348/91752	2
430	SPP1_Mac	GO:1905907	negative regulation of amyloid fibril formation	2/156	13/18870	0.00498941	0.0366896	0.0267853	54209/348	2
431	SPP1_Mac	GO:0030851	granulocyte differentiation	3/156	42/18870	0.00502434	0.0367753	0.0268479	10370/6688/2124	3
432	SPP1_Mac	GO:0030866	cortical actin cytoskeleton organization	3/156	42/18870	0.00502434	0.0367753	0.0268479	3936/5872/811	3
433	SPP1_Mac	GO:2000146	negative regulation of cell motility	9/156	388/18870	0.00505051	0.0368816	0.0269254	28984/348/4286/1545/56833/10370/2022/811/5468	9
434	SPP1_Mac	GO:0007586	digestion	5/156	134/18870	0.00514455	0.0374311	0.0273266	1118/3988/948/10062/29887	5
435	SPP1_Mac	GO:0071706	tumor necrosis factor superfamily cytokine production	6/156	191/18870	0.00516128	0.0374311	0.0273266	4023/54209/1536/948/3459/10417	6
436	SPP1_Mac	GO:1903555	regulation of tumor necrosis factor superfamily cytokine production	6/156	191/18870	0.00516128	0.0374311	0.0273266	4023/54209/1536/948/3459/10417	6
437	SPP1_Mac	GO:0097305	response to alcohol	7/156	254/18870	0.0052596	0.0380569	0.0277835	2203/2230/1536/3988/2/1545/978	7
438	SPP1_Mac	GO:0031345	negative regulation of cell projection organization	6/156	192/18870	0.00529225	0.0382057	0.0278921	6696/348/8829/7431/3675/2316	6
439	SPP1_Mac	GO:1902105	regulation of leukocyte differentiation	8/156	321/18870	0.00531079	0.0382522	0.027926	54209/81501/4286/3606/56833/84293/6688/2124	8
440	SPP1_Mac	GO:0010712	regulation of collagen metabolic process	3/156	43/18870	0.00536879	0.0384661	0.0280822	28984/7431/2022	3
441	SPP1_Mac	GO:0044403	biological process involved in symbiotic interaction	8/156	322/18870	0.00540884	0.0384661	0.0280822	2934/348/8829/1508/3693/2876/290/1514	8
442	SPP1_Mac	GO:0034103	regulation of tissue remodeling	4/156	85/18870	0.00541748	0.0384661	0.0280822	6696/81501/3606/5468	4
443	SPP1_Mac	GO:0051101	regulation of DNA binding	4/156	85/18870	0.00541748	0.0384661	0.0280822	4318/7114/5329/5468	4
444	SPP1_Mac	GO:0051591	response to cAMP	4/156	85/18870	0.00541748	0.0384661	0.0280822	2203/2230/366/1545	4
445	SPP1_Mac	GO:0061515	myeloid cell development	4/156	85/18870	0.00541748	0.0384661	0.0280822	302/10370/2124/2316	4
446	SPP1_Mac	GO:0009749	response to glucose	6/156	193/18870	0.00542564	0.0384661	0.0280822	4023/54209/10628/9462/2876/7351	6
447	SPP1_Mac	GO:0002443	leukocyte mediated immunity	10/156	466/18870	0.00546043	0.0385399	0.0281361	54209/3689/5880/2207/3606/6688/3684/2268/10312/10417	10
448	SPP1_Mac	GO:0051960	regulation of nervous system development	10/156	466/18870	0.00546043	0.0385399	0.0281361	6696/54209/8829/302/1382/23768/3687/8650/79365/57698	10
449	SPP1_Mac	GO:0008625	extrinsic apoptotic signaling pathway via death domain receptors	4/156	86/18870	0.00564585	0.0397599	0.0290267	2876/6688/8682/7078	4
450	SPP1_Mac	GO:1903307	positive regulation of regulated secretory pathway	3/156	44/18870	0.00572712	0.0398834	0.0291169	3689/3684/2268	3
451	SPP1_Mac	GO:0010745	negative regulation of macrophage derived foam cell differentiation	2/156	14/18870	0.00578953	0.0398834	0.0291169	10062/5468	2
452	SPP1_Mac	GO:0032736	positive regulation of interleukin-13 production	2/156	14/18870	0.00578953	0.0398834	0.0291169	3606/23765	2
453	SPP1_Mac	GO:0033700	phospholipid efflux	2/156	14/18870	0.00578953	0.0398834	0.0291169	348/341	2
454	SPP1_Mac	GO:0060330	regulation of response to type II interferon	2/156	14/18870	0.00578953	0.0398834	0.0291169	10062/5468	2
455	SPP1_Mac	GO:0060334	regulation of type II interferon-mediated signaling pathway	2/156	14/18870	0.00578953	0.0398834	0.0291169	10062/5468	2
456	SPP1_Mac	GO:0060837	blood vessel endothelial cell differentiation	2/156	14/18870	0.00578953	0.0398834	0.0291169	8829/3988	2
457	SPP1_Mac	GO:0070341	fat cell proliferation	2/156	14/18870	0.00578953	0.0398834	0.0291169	54209/3988	2
458	SPP1_Mac	GO:0098883	synapse pruning	2/156	14/18870	0.00578953	0.0398834	0.0291169	54209/3684	2
459	SPP1_Mac	GO:1902043	positive regulation of extrinsic apoptotic signaling pathway via death domain receptors	2/156	14/18870	0.00578953	0.0398834	0.0291169	8682/7078	2
460	SPP1_Mac	GO:0043123	positive regulation of canonical NF-kappaB signal transduction	6/156	196/18870	0.00584062	0.0401479	0.02931	6275/948/51523/1893/2316/389	6
461	SPP1_Mac	GO:0048708	astrocyte differentiation	4/156	87/18870	0.00588056	0.0403348	0.0294464	6280/54209/7431/3459	4
462	SPP1_Mac	GO:0002347	response to tumor cell	3/156	45/18870	0.00609946	0.041261	0.0301226	10628/7805/6688	3
463	SPP1_Mac	GO:0030574	collagen catabolic process	3/156	45/18870	0.00609946	0.041261	0.0301226	4318/1508/1514	3
464	SPP1_Mac	GO:0090199	regulation of release of cytochrome c from mitochondria	3/156	45/18870	0.00609946	0.041261	0.0301226	4318/2876/5329	3
465	SPP1_Mac	GO:1900744	regulation of p38MAPK cascade	3/156	45/18870	0.00609946	0.041261	0.0301226	54209/6688/4217	3
466	SPP1_Mac	GO:1905521	regulation of macrophage migration	3/156	45/18870	0.00609946	0.041261	0.0301226	54209/928/56833	3
467	SPP1_Mac	GO:0032147	activation of protein kinase activity	4/156	88/18870	0.00612169	0.041261	0.0301226	1116/55704/6556/3606	4
468	SPP1_Mac	GO:0009746	response to hexose	6/156	198/18870	0.00612986	0.041261	0.0301226	4023/54209/10628/9462/2876/7351	6
469	SPP1_Mac	GO:0006979	response to oxidative stress	9/156	400/18870	0.0061313	0.041261	0.0301226	4318/348/4257/10628/948/1545/2876/7351/4217	9
470	SPP1_Mac	GO:0043410	positive regulation of MAPK cascade	10/156	474/18870	0.00613304	0.041261	0.0301226	1116/54209/348/8829/960/152007/7805/948/6688/4217	10
471	SPP1_Mac	GO:0010977	negative regulation of neuron projection development	5/156	140/18870	0.00617774	0.0414735	0.0302777	6696/348/8829/7431/2316	5
472	SPP1_Mac	GO:0048762	mesenchymal cell differentiation	7/156	262/18870	0.00620528	0.0414822	0.0302841	28984/8829/152007/6275/10370/2316/2022	7
473	SPP1_Mac	GO:0051098	regulation of binding	7/156	262/18870	0.00620528	0.0414822	0.0302841	4318/348/8829/302/7114/5329/5468	7
474	SPP1_Mac	GO:0048545	response to steroid hormone	8/156	330/18870	0.00624395	0.0416527	0.0304086	6696/3557/1536/10628/2/1545/10062/811	8
475	SPP1_Mac	GO:0051453	regulation of intracellular pH	4/156	89/18870	0.0063693	0.0423994	0.0309537	6556/10159/56833/10312	4
476	SPP1_Mac	GO:0097028	dendritic cell differentiation	3/156	46/18870	0.00648595	0.0430852	0.0314544	54209/81501/6688	3
477	SPP1_Mac	GO:0032388	positive regulation of intracellular transport	6/156	201/18870	0.0065831	0.0433172	0.0316238	3689/5880/302/10134/3684/2316	6
478	SPP1_Mac	GO:0043122	regulation of canonical NF-kappaB signal transduction	7/156	265/18870	0.00659078	0.0433172	0.0316238	54209/6275/948/51523/1893/2316/389	7
479	SPP1_Mac	GO:0010226	response to lithium ion	2/156	15/18870	0.00664416	0.0433172	0.0316238	811/2167	2
480	SPP1_Mac	GO:0010649	regulation of cell communication by electrical coupling	2/156	15/18870	0.00664416	0.0433172	0.0316238	6546/808	2
481	SPP1_Mac	GO:0035358	regulation of peroxisome proliferator activated receptor signaling pathway	2/156	15/18870	0.00664416	0.0433172	0.0316238	2171/10370	2
482	SPP1_Mac	GO:0042159	lipoprotein catabolic process	2/156	15/18870	0.00664416	0.0433172	0.0316238	348/3988	2
483	SPP1_Mac	GO:0046348	amino sugar catabolic process	2/156	15/18870	0.00664416	0.0433172	0.0316238	1116/1118	2
484	SPP1_Mac	GO:0060009	Sertoli cell development	2/156	15/18870	0.00664416	0.0433172	0.0316238	5872/2316	2
485	SPP1_Mac	GO:0072537	fibroblast activation	2/156	15/18870	0.00664416	0.0433172	0.0316238	28984/23765	2
486	SPP1_Mac	GO:0046394	carboxylic acid biosynthetic process	8/156	334/18870	0.0066966	0.0435292	0.0317785	2171/4023/10062/6507/341/4048/4259/2681	8
487	SPP1_Mac	GO:0051090	regulation of DNA-binding transcription factor activity	9/156	406/18870	0.00673461	0.0435292	0.0317785	6280/28984/7114/948/1545/3606/6688/2316/5468	9
488	SPP1_Mac	GO:0002695	negative regulation of leukocyte activation	6/156	202/18870	0.00673946	0.0435292	0.0317785	4332/7805/10062/11326/6688/2268	6
489	SPP1_Mac	GO:0003158	endothelium development	5/156	143/18870	0.00674551	0.0435292	0.0317785	8829/3988/694/3687/2876	5
490	SPP1_Mac	GO:0014074	response to purine-containing compound	5/156	143/18870	0.00674551	0.0435292	0.0317785	2203/2230/6546/366/1545	5
491	SPP1_Mac	GO:1903131	mononuclear cell differentiation	10/156	481/18870	0.00677317	0.0436187	0.0318439	54209/81501/3988/2207/3606/56833/6688/10312/1514/5468	10
492	SPP1_Mac	GO:0097581	lamellipodium organization	4/156	91/18870	0.00688429	0.0440806	0.0321811	5880/55704/960/51177	4
493	SPP1_Mac	GO:0106027	neuron projection organization	4/156	91/18870	0.00688429	0.0440806	0.0321811	54209/348/3675/91752	4
494	SPP1_Mac	GO:0002920	regulation of humoral immune response	3/156	47/18870	0.00688672	0.0440806	0.0321811	54209/2/11326	3
495	SPP1_Mac	GO:0032386	regulation of intracellular transport	8/156	336/18870	0.00693206	0.0441919	0.0322623	3689/5880/302/10134/948/3936/3684/2316	8
496	SPP1_Mac	GO:0070371	ERK1 and ERK2 cascade	8/156	336/18870	0.00693206	0.0441919	0.0322623	1116/54209/348/8829/960/152007/948/7078	8
497	SPP1_Mac	GO:0016053	organic acid biosynthetic process	8/156	337/18870	0.00705211	0.0448667	0.032755	2171/4023/10062/6507/341/4048/4259/2681	8
498	SPP1_Mac	GO:0003018	vascular process in circulatory system	7/156	269/18870	0.00713221	0.0452675	0.0330476	2171/348/6546/948/8714/6507/2876	7
499	SPP1_Mac	GO:2001235	positive regulation of apoptotic signaling pathway	5/156	145/18870	0.00714373	0.0452675	0.0330476	6280/10134/8682/1514/7078	5
500	SPP1_Mac	GO:0007178	transmembrane receptor protein serine/threonine kinase signaling pathway	9/156	410/18870	0.00716152	0.0452894	0.0330636	7431/3675/7791/57552/3693/10370/6688/2022/5468	9
501	SPP1_Mac	GO:0022408	negative regulation of cell-cell adhesion	6/156	205/18870	0.00722471	0.0455979	0.0332888	28984/3557/7805/928/11326/6688	6
502	SPP1_Mac	GO:0002861	regulation of inflammatory response to antigenic stimulus	3/156	48/18870	0.0073019	0.0456297	0.033312	54209/2876/2268	3
503	SPP1_Mac	GO:0032964	collagen biosynthetic process	3/156	48/18870	0.0073019	0.0456297	0.033312	28984/7431/2022	3
504	SPP1_Mac	GO:0043277	apoptotic cell clearance	3/156	48/18870	0.0073019	0.0456297	0.033312	54209/948/10062	3
505	SPP1_Mac	GO:1900542	regulation of purine nucleotide metabolic process	3/156	48/18870	0.0073019	0.0456297	0.033312	54209/7114/4199	3
506	SPP1_Mac	GO:2001222	regulation of neuron migration	3/156	48/18870	0.0073019	0.0456297	0.033312	23768/2316/57698	3
507	SPP1_Mac	GO:0034284	response to monosaccharide	6/156	206/18870	0.00739194	0.0461012	0.0336563	4023/54209/10628/9462/2876/7351	6
508	SPP1_Mac	GO:0030641	regulation of cellular pH	4/156	93/18870	0.00742612	0.0462232	0.0337453	6556/10159/56833/10312	4
509	SPP1_Mac	GO:0030810	positive regulation of nucleotide biosynthetic process	2/156	16/18870	0.00755236	0.0462258	0.0337472	54209/7114	2
510	SPP1_Mac	GO:0032930	positive regulation of superoxide anion generation	2/156	16/18870	0.00755236	0.0462258	0.0337472	3689/3684	2
511	SPP1_Mac	GO:0034375	high-density lipoprotein particle remodeling	2/156	16/18870	0.00755236	0.0462258	0.0337472	348/341	2
512	SPP1_Mac	GO:0051004	regulation of lipoprotein lipase activity	2/156	16/18870	0.00755236	0.0462258	0.0337472	10062/341	2
513	SPP1_Mac	GO:0090136	epithelial cell-cell adhesion	2/156	16/18870	0.00755236	0.0462258	0.0337472	1545/3693	2
514	SPP1_Mac	GO:1900373	positive regulation of purine nucleotide biosynthetic process	2/156	16/18870	0.00755236	0.0462258	0.0337472	54209/7114	2
515	SPP1_Mac	GO:0062013	positive regulation of small molecule metabolic process	5/156	147/18870	0.0075581	0.0462258	0.0337472	54209/348/7114/10062/5468	5
516	SPP1_Mac	GO:0071456	cellular response to hypoxia	5/156	147/18870	0.0075581	0.0462258	0.0337472	54209/28984/1536/10370/5468	5
517	SPP1_Mac	GO:2000377	regulation of reactive oxygen species metabolic process	5/156	147/18870	0.0075581	0.0462258	0.0337472	3689/5880/948/1545/3684	5
518	SPP1_Mac	GO:0110053	regulation of actin filament organization	7/156	273/18870	0.007706	0.0466744	0.0340747	2934/28984/8829/55704/7114/2316/389	7
519	SPP1_Mac	GO:0032411	positive regulation of transporter activity	4/156	94/18870	0.00770727	0.0466744	0.0340747	54209/7114/808/10062	4
520	SPP1_Mac	GO:0051492	regulation of stress fiber assembly	4/156	94/18870	0.00770727	0.0466744	0.0340747	28984/8829/55704/389	4
521	SPP1_Mac	GO:0014911	positive regulation of smooth muscle cell migration	3/156	49/18870	0.00773162	0.0466744	0.0340747	8829/6282/1545	3
522	SPP1_Mac	GO:0035987	endodermal cell differentiation	3/156	49/18870	0.00773162	0.0466744	0.0340747	4318/3689/3693	3
523	SPP1_Mac	GO:2001259	positive regulation of cation channel activity	3/156	49/18870	0.00773162	0.0466744	0.0340747	54209/7114/808	3
524	SPP1_Mac	GO:0031032	actomyosin structure organization	6/156	208/18870	0.00773478	0.0466744	0.0340747	28984/8829/55704/7791/3693/389	6
525	SPP1_Mac	GO:0007044	cell-substrate junction assembly	4/156	95/18870	0.00799534	0.0481548	0.0351554	8829/87/3987/3655	4
526	SPP1_Mac	GO:0018108	peptidyl-tyrosine phosphorylation	7/156	276/18870	0.00815825	0.0486863	0.0355435	54209/3689/8829/960/948/3606/2268	7
527	SPP1_Mac	GO:0030865	cortical cytoskeleton organization	3/156	50/18870	0.00817597	0.0486863	0.0355435	3936/5872/811	3
528	SPP1_Mac	GO:0048066	developmental pigmentation	3/156	50/18870	0.00817597	0.0486863	0.0355435	55686/4286/10159	3
529	SPP1_Mac	GO:0061082	myeloid leukocyte cytokine production	3/156	50/18870	0.00817597	0.0486863	0.0355435	7805/948/10417	3
530	SPP1_Mac	GO:0071827	plasma lipoprotein particle organization	3/156	50/18870	0.00817597	0.0486863	0.0355435	4023/348/341	3
531	SPP1_Mac	GO:1902041	regulation of extrinsic apoptotic signaling pathway via death domain receptors	3/156	50/18870	0.00817597	0.0486863	0.0355435	2876/8682/7078	3
532	SPP1_Mac	GO:0051701	biological process involved in interaction with host	6/156	211/18870	0.00827035	0.0491557	0.0358862	2934/8829/1508/3693/290/1514	6
533	SPP1_Mac	GO:0002705	positive regulation of leukocyte mediated immunity	5/156	151/18870	0.00843658	0.0496655	0.0362584	54209/3689/3606/6688/3684	5
534	SPP1_Mac	GO:0018212	peptidyl-tyrosine modification	7/156	278/18870	0.00847045	0.0496655	0.0362584	54209/3689/8829/960/948/3606/2268	7
535	SPP1_Mac	GO:0002921	negative regulation of humoral immune response	2/156	17/18870	0.00851319	0.0496655	0.0362584	2/11326	2
536	SPP1_Mac	GO:0010155	regulation of proton transport	2/156	17/18870	0.00851319	0.0496655	0.0362584	7114/10312	2
537	SPP1_Mac	GO:0010544	negative regulation of platelet activation	2/156	17/18870	0.00851319	0.0496655	0.0362584	348/928	2
538	SPP1_Mac	GO:0050872	white fat cell differentiation	2/156	17/18870	0.00851319	0.0496655	0.0362584	5468/2167	2
539	SPP1_Mac	GO:0055119	relaxation of cardiac muscle	2/156	17/18870	0.00851319	0.0496655	0.0362584	2934/6546	2
540	SPP1_Mac	GO:0061548	ganglion development	2/156	17/18870	0.00851319	0.0496655	0.0362584	8829/1545	2
541	SPP1_Mac	GO:0097067	cellular response to thyroid hormone stimulus	2/156	17/18870	0.00851319	0.0496655	0.0362584	1508/1514	2
542	SPP1_Mac	GO:1905906	regulation of amyloid fibril formation	2/156	17/18870	0.00851319	0.0496655	0.0362584	54209/348	2
543	HLAII_Mac	GO:0019886	antigen processing and presentation of exogenous peptide antigen via MHC class II	14/125	31/18870	3.57013e-23	8.16846e-20	6.62541e-20	3117/972/3122/3115/3123/5641/3113/3119/3109/10437/3108/1520/1509/2213	14
544	HLAII_Mac	GO:0002495	antigen processing and presentation of peptide antigen via MHC class II	14/125	35/18870	3.05523e-22	3.49519e-19	2.83493e-19	3117/972/3122/3115/3123/5641/3113/3119/3109/10437/3108/1520/1509/2213	14
545	HLAII_Mac	GO:0002504	antigen processing and presentation of peptide or polysaccharide antigen via MHC class II	14/125	37/18870	7.95445e-22	6.06659e-19	4.92059e-19	3117/972/3122/3115/3123/5641/3113/3119/3109/10437/3108/1520/1509/2213	14
546	HLAII_Mac	GO:0002478	antigen processing and presentation of exogenous peptide antigen	14/125	40/18870	2.97311e-21	1.70062e-18	1.37937e-18	3117/972/3122/3115/3123/5641/3113/3119/3109/10437/3108/1520/1509/2213	14
547	HLAII_Mac	GO:0019884	antigen processing and presentation of exogenous antigen	14/125	49/18870	8.23203e-20	3.76698e-17	3.05538e-17	3117/972/3122/3115/3123/5641/3113/3119/3109/10437/3108/1520/1509/2213	14
548	HLAII_Mac	GO:0048002	antigen processing and presentation of peptide antigen	14/125	71/18870	2.5993e-17	9.91198e-15	8.03958e-15	3117/972/3122/3115/3123/5641/3113/3119/3109/10437/3108/1520/1509/2213	14
549	HLAII_Mac	GO:0019882	antigen processing and presentation	15/125	116/18870	1.37584e-15	4.49703e-13	3.64753e-13	3117/972/3122/3115/3123/5641/3113/3119/3109/10437/3108/1520/1512/1509/2213	15
550	HLAII_Mac	GO:0002399	MHC class II protein complex assembly	8/125	16/18870	3.63774e-14	9.24795e-12	7.50098e-12	3117/3122/3115/3123/3113/3119/3109/3108	8
551	HLAII_Mac	GO:0002503	peptide antigen assembly with MHC class II protein complex	8/125	16/18870	3.63774e-14	9.24795e-12	7.50098e-12	3117/3122/3115/3123/3113/3119/3109/3108	8
552	HLAII_Mac	GO:0002396	MHC protein complex assembly	8/125	20/18870	3.48271e-13	7.24404e-11	5.87562e-11	3117/3122/3115/3123/3113/3119/3109/3108	8
553	HLAII_Mac	GO:0002501	peptide antigen assembly with MHC protein complex	8/125	20/18870	3.48271e-13	7.24404e-11	5.87562e-11	3117/3122/3115/3123/3113/3119/3109/3108	8
554	HLAII_Mac	GO:0050863	regulation of T cell activation	17/125	381/18870	5.92108e-10	1.12895e-07	9.1569e-08	6347/3117/972/3122/3115/3123/3113/3119/3958/10457/3109/3108/3956/8764/3726/9308/2213	17
555	HLAII_Mac	GO:0030593	neutrophil chemotaxis	10/125	107/18870	2.30965e-09	4.06499e-07	3.2971e-07	6347/972/3958/414062/3576/2920/6348/6351/6355/2921	10
556	HLAII_Mac	GO:0022407	regulation of cell-cell adhesion	18/125	493/18870	4.29514e-09	7.01949e-07	5.69349e-07	6347/3117/972/3122/3115/3123/3113/3119/3958/10457/3109/3108/53827/3956/8764/9308/8613/2213	18
557	HLAII_Mac	GO:1903037	regulation of leukocyte cell-cell adhesion	16/125	382/18870	4.87299e-09	7.43293e-07	6.02883e-07	6347/3117/972/3122/3115/3123/3113/3119/3958/10457/3109/3108/3956/8764/9308/2213	16
558	HLAII_Mac	GO:0071356	cellular response to tumor necrosis factor	13/125	238/18870	6.4687e-09	9.25024e-07	7.50284e-07	6347/2353/7538/55022/8764/427/414062/3576/6348/677/6351/6355/1513	13
559	HLAII_Mac	GO:0030595	leukocyte chemotaxis	13/125	240/18870	7.15267e-09	9.62666e-07	7.80815e-07	6347/972/5641/3958/4814/414062/3576/2920/6348/1843/6351/6355/2921	13
560	HLAII_Mac	GO:0050870	positive regulation of T cell activation	13/125	251/18870	1.22279e-08	1.5543e-06	1.26069e-06	6347/3117/972/3122/3115/3123/3113/3119/3109/3108/3956/8764/9308	13
561	HLAII_Mac	GO:1990266	neutrophil migration	10/125	129/18870	1.43035e-08	1.72245e-06	1.39707e-06	6347/972/3958/414062/3576/2920/6348/6351/6355/2921	10
562	HLAII_Mac	GO:0071621	granulocyte chemotaxis	10/125	130/18870	1.54096e-08	1.76286e-06	1.42985e-06	6347/972/3958/414062/3576/2920/6348/6351/6355/2921	10
563	HLAII_Mac	GO:0034612	response to tumor necrosis factor	13/125	259/18870	1.77624e-08	1.83548e-06	1.48875e-06	6347/2353/7538/55022/8764/427/414062/3576/6348/677/6351/6355/1513	13
564	HLAII_Mac	GO:0007159	leukocyte cell-cell adhesion	16/125	419/18870	1.79446e-08	1.83548e-06	1.48875e-06	6347/3117/972/3122/3115/3123/3113/3119/3958/10457/3109/3108/3956/8764/9308/2213	16
565	HLAII_Mac	GO:1990868	response to chemokine	9/125	99/18870	1.92533e-08	1.83548e-06	1.48875e-06	6347/414062/3576/2920/6348/1843/6351/6355/2921	9
566	HLAII_Mac	GO:1990869	cellular response to chemokine	9/125	99/18870	1.92533e-08	1.83548e-06	1.48875e-06	6347/414062/3576/2920/6348/1843/6351/6355/2921	9
567	HLAII_Mac	GO:0002548	monocyte chemotaxis	8/125	71/18870	2.21922e-08	2.03103e-06	1.64736e-06	6347/5641/3958/414062/6348/1843/6351/6355	8
568	HLAII_Mac	GO:0048245	eosinophil chemotaxis	6/125	28/18870	2.50353e-08	2.20311e-06	1.78694e-06	6347/3958/414062/6348/6351/6355	6
569	HLAII_Mac	GO:0022409	positive regulation of cell-cell adhesion	14/125	322/18870	2.98765e-08	2.53175e-06	2.0535e-06	6347/3117/972/3122/3115/3123/3113/3119/3109/3108/3956/8764/9308/8613	14
570	HLAII_Mac	GO:0002696	positive regulation of leukocyte activation	15/125	380/18870	3.34823e-08	2.73598e-06	2.21915e-06	6347/3117/972/3122/3115/3123/3113/3119/3109/3108/1075/3956/8764/6348/9308	15
571	HLAII_Mac	GO:1903039	positive regulation of leukocyte cell-cell adhesion	13/125	275/18870	3.60727e-08	2.84601e-06	2.30839e-06	6347/3117/972/3122/3115/3123/3113/3119/3109/3108/3956/8764/9308	13
572	HLAII_Mac	GO:0034341	response to type II interferon	10/125	143/18870	3.84305e-08	2.93096e-06	2.3773e-06	6347/972/3113/414062/10410/6348/6351/3394/4360/6355	10
573	HLAII_Mac	GO:0050867	positive regulation of cell activation	15/125	396/18870	5.75428e-08	4.21342e-06	3.41749e-06	6347/3117/972/3122/3115/3123/3113/3119/3109/3108/1075/3956/8764/6348/9308	15
574	HLAII_Mac	GO:0072677	eosinophil migration	6/125	32/18870	5.89289e-08	4.21342e-06	3.41749e-06	6347/3958/414062/6348/6351/6355	6
575	HLAII_Mac	GO:0097529	myeloid leukocyte migration	12/125	242/18870	7.3902e-08	5.12387e-06	4.15596e-06	6347/972/5641/3958/414062/3576/2920/6348/1843/6351/6355/2921	12
576	HLAII_Mac	GO:0006935	chemotaxis	16/125	468/18870	8.28442e-08	5.57493e-06	4.5218e-06	6347/972/5641/3958/10457/5328/4814/2359/414062/3576/2920/6348/1843/6351/6355/2921	16
577	HLAII_Mac	GO:0097530	granulocyte migration	10/125	156/18870	8.77161e-08	5.58126e-06	4.52694e-06	6347/972/3958/414062/3576/2920/6348/6351/6355/2921	10
578	HLAII_Mac	GO:0042330	taxis	16/125	470/18870	8.78171e-08	5.58126e-06	4.52694e-06	6347/972/5641/3958/10457/5328/4814/2359/414062/3576/2920/6348/1843/6351/6355/2921	16
579	HLAII_Mac	GO:0006959	humoral immune response	12/125	258/18870	1.4833e-07	9.17243e-06	7.43973e-06	6347/1675/3123/3119/3576/2920/9308/2213/712/2921/713/714	12
580	HLAII_Mac	GO:0070098	chemokine-mediated signaling pathway	8/125	91/18870	1.58748e-07	9.55828e-06	7.75269e-06	6347/414062/3576/2920/6348/6351/6355/2921	8
581	HLAII_Mac	GO:0060326	cell chemotaxis	13/125	325/18870	2.50689e-07	1.47071e-05	1.19289e-05	6347/972/5641/3958/4814/414062/3576/2920/6348/1843/6351/6355/2921	13
582	HLAII_Mac	GO:0051251	positive regulation of lymphocyte activation	13/125	330/18870	2.98455e-07	1.70716e-05	1.38468e-05	6347/3117/972/3122/3115/3123/3113/3119/3109/3108/3956/8764/9308	13
583	HLAII_Mac	GO:0050900	leukocyte migration	14/125	396/18870	3.7864e-07	2.113e-05	1.71385e-05	6347/972/5641/3958/8764/4814/414062/3576/2920/6348/1843/6351/6355/2921	14
584	HLAII_Mac	GO:1903131	mononuclear cell differentiation	15/125	481/18870	6.96557e-07	3.79458e-05	3.07777e-05	972/3122/3123/2353/1958/3956/3726/1316/677/9308/9935/4063/2213/3394/1513	15
585	HLAII_Mac	GO:0002366	leukocyte activation involved in immune response	12/125	301/18870	7.709e-07	4.10191e-05	3.32704e-05	972/3122/3123/3958/3109/3956/2896/3726/6348/4063/2213/3394	12
586	HLAII_Mac	GO:0002263	cell activation involved in immune response	12/125	305/18870	8.85954e-07	4.60696e-05	3.73669e-05	972/3122/3123/3958/3109/3956/2896/3726/6348/4063/2213/3394	12
587	HLAII_Mac	GO:0016032	viral process	14/125	432/18870	1.06882e-06	5.43436e-05	4.40779e-05	6347/972/3123/7538/3956/8764/26986/10410/3576/6348/6351/4599/4360/6355	14
588	HLAII_Mac	GO:0071346	cellular response to type II interferon	8/125	120/18870	1.33754e-06	6.65281e-05	5.39607e-05	6347/3113/414062/6348/6351/3394/4360/6355	8
589	HLAII_Mac	GO:1902105	regulation of leukocyte differentiation	12/125	321/18870	1.51356e-06	7.36815e-05	5.97628e-05	972/3122/3123/2353/3726/6348/677/9308/7071/9935/2213/714	12
590	HLAII_Mac	GO:0002285	lymphocyte activation involved in immune response	10/125	213/18870	1.55893e-06	7.43089e-05	6.02717e-05	972/3122/3123/3958/3109/3956/3726/4063/2213/3394	10
591	HLAII_Mac	GO:0002286	T cell activation involved in immune response	8/125	123/18870	1.61248e-06	7.52928e-05	6.10697e-05	972/3122/3123/3958/3109/3726/4063/2213	8
592	HLAII_Mac	GO:0002761	regulation of myeloid leukocyte differentiation	8/125	124/18870	1.71421e-06	7.84421e-05	6.36241e-05	972/3123/2353/6348/677/7071/9935/714	8
593	HLAII_Mac	GO:0002468	dendritic cell antigen processing and presentation	4/125	15/18870	2.36715e-06	0.000106197	8.6136e-05	972/3122/3123/2213	4
594	HLAII_Mac	GO:0043523	regulation of neuron apoptotic process	10/125	232/18870	3.35588e-06	0.000147659	0.000119765	6347/5641/26471/1958/7832/2896/6348/1649/6648/2213	10
595	HLAII_Mac	GO:0045785	positive regulation of cell adhesion	14/125	482/18870	3.83483e-06	0.000165549	0.000134276	6347/3117/972/3122/3115/3123/3113/3119/3109/3108/3956/8764/9308/8613	14
596	HLAII_Mac	GO:1903706	regulation of hemopoiesis	13/125	417/18870	4.05199e-06	0.000171684	0.000139253	972/3122/3123/2353/7538/3726/6348/677/9308/7071/9935/2213/714	13
597	HLAII_Mac	GO:0030098	lymphocyte differentiation	13/125	429/18870	5.51001e-06	0.000229217	0.000185917	972/3122/3123/1958/3956/3726/1316/677/9308/9935/4063/2213/3394	13
598	HLAII_Mac	GO:0140467	integrated stress response signaling	5/125	42/18870	8.22766e-06	0.000336159	0.000272657	2353/3726/1052/9935/1649	5
599	HLAII_Mac	GO:0071347	cellular response to interleukin-1	7/125	111/18870	9.07525e-06	0.000364284	0.000295469	6347/1958/414062/3576/6348/6351/6355	7
600	HLAII_Mac	GO:0019058	viral life cycle	11/125	321/18870	9.62677e-06	0.00037976	0.000308022	6347/972/3123/3956/8764/26986/10410/3576/4599/4360/6355	11
601	HLAII_Mac	GO:0071674	mononuclear cell migration	9/125	207/18870	9.85624e-06	0.000382222	0.000310019	6347/5641/3958/8764/414062/6348/1843/6351/6355	9
602	HLAII_Mac	GO:0045637	regulation of myeloid cell differentiation	9/125	213/18870	1.23925e-05	0.000472567	0.000383298	972/3123/2353/7538/6348/677/7071/9935/714	9
603	HLAII_Mac	GO:2001233	regulation of apoptotic signaling pathway	12/125	398/18870	1.35525e-05	0.000508331	0.000412306	972/26471/3958/8870/7178/1520/1075/1512/1649/6648/2213/1513	12
604	HLAII_Mac	GO:0070371	ERK1 and ERK2 cascade	11/125	336/18870	1.47506e-05	0.0005416	0.00043929	6347/972/3123/10457/8685/1512/414062/6348/677/6351/6355	11
605	HLAII_Mac	GO:0070374	positive regulation of ERK1 and ERK2 cascade	9/125	218/18870	1.49129e-05	0.0005416	0.00043929	6347/972/3123/10457/8685/414062/6348/6351/6355	9
606	HLAII_Mac	GO:0050792	regulation of viral process	8/125	168/18870	1.62378e-05	0.000577124	0.000468103	972/3123/7538/3956/26986/10410/3576/4599	8
607	HLAII_Mac	GO:0051402	neuron apoptotic process	10/125	278/18870	1.63956e-05	0.000577124	0.000468103	6347/5641/26471/1958/7832/2896/6348/1649/6648/2213	10
608	HLAII_Mac	GO:0071675	regulation of mononuclear cell migration	7/125	125/18870	1.97389e-05	0.00068428	0.000555018	6347/5641/3958/8764/6348/1843/6351	7
609	HLAII_Mac	GO:0002688	regulation of leukocyte chemotaxis	7/125	126/18870	2.07862e-05	0.000709833	0.000575743	6347/972/5641/3576/6348/1843/6351	7
610	HLAII_Mac	GO:0002685	regulation of leukocyte migration	9/125	230/18870	2.28039e-05	0.000767283	0.000622341	6347/972/5641/3958/8764/3576/6348/1843/6351	9
611	HLAII_Mac	GO:0050727	regulation of inflammatory response	12/125	425/18870	2.59095e-05	0.000859144	0.000696849	3123/26471/7538/8870/54/1075/3956/2896/4814/144811/6348/2213	12
612	HLAII_Mac	GO:0002573	myeloid leukocyte differentiation	9/125	235/18870	2.70109e-05	0.00088287	0.000716093	972/3123/2353/3726/6348/677/7071/9935/714	9
613	HLAII_Mac	GO:0030099	myeloid cell differentiation	12/125	430/18870	2.90482e-05	0.00093609	0.00075926	972/3123/2353/7538/8761/3726/6348/677/7071/9935/3394/714	12
614	HLAII_Mac	GO:0050670	regulation of lymphocyte proliferation	9/125	238/18870	2.98382e-05	0.000948192	0.000769075	972/3115/3123/3113/3958/10457/3109/8764/2213	9
615	HLAII_Mac	GO:0035747	natural killer cell chemotaxis	3/125	10/18870	3.29158e-05	0.00101772	0.000825471	6347/6348/6351	3
616	HLAII_Mac	GO:0045657	positive regulation of monocyte differentiation	3/125	10/18870	3.29158e-05	0.00101772	0.000825471	972/3123/677	3
617	HLAII_Mac	GO:0032944	regulation of mononuclear cell proliferation	9/125	242/18870	3.39955e-05	0.00103286	0.000837751	972/3115/3123/3113/3958/10457/3109/8764/2213	9
618	HLAII_Mac	GO:0052372	modulation by symbiont of entry into host	5/125	56/18870	3.43083e-05	0.00103286	0.000837751	972/3123/3956/10410/3576	5
619	HLAII_Mac	GO:0002237	response to molecule of bacterial origin	11/125	369/18870	3.49246e-05	0.00103776	0.000841724	6347/2353/7538/54/3576/2920/6648/2213/3394/4360/2921	11
620	HLAII_Mac	GO:0070555	response to interleukin-1	7/125	140/18870	4.09624e-05	0.00120156	0.000974585	6347/1958/414062/3576/6348/6351/6355	7
621	HLAII_Mac	GO:0002460	adaptive immune response based on somatic recombination of immune receptors built from immunoglobulin superfamily domains	11/125	380/18870	4.55826e-05	0.00132016	0.00107078	972/3122/3123/1075/3726/1512/4063/2213/712/713/714	11
622	HLAII_Mac	GO:1903900	regulation of viral life cycle	7/125	143/18870	4.68971e-05	0.00134009	0.00108694	972/3123/3956/26986/10410/3576/4599	7
623	HLAII_Mac	GO:0001913	T cell mediated cytotoxicity	5/125	60/18870	4.80277e-05	0.00134009	0.00108694	3122/3123/1075/1512/2213	5
624	HLAII_Mac	GO:0002763	positive regulation of myeloid leukocyte differentiation	5/125	60/18870	4.80277e-05	0.00134009	0.00108694	972/3123/2353/677/7071	5
625	HLAII_Mac	GO:0002697	regulation of immune effector process	11/125	389/18870	5.62817e-05	0.0015337	0.00124398	972/3122/3123/3958/3109/54/8764/2896/3726/144811/2213	11
626	HLAII_Mac	GO:0043030	regulation of macrophage activation	5/125	62/18870	5.6307e-05	0.0015337	0.00124398	972/1075/2896/6348/2213	5
627	HLAII_Mac	GO:0044403	biological process involved in symbiotic interaction	10/125	322/18870	5.70934e-05	0.00153682	0.00124651	972/3123/3956/8764/10410/3576/6348/6351/4360/6355	10
628	HLAII_Mac	GO:0002687	positive regulation of leukocyte migration	7/125	149/18870	6.08887e-05	0.00161992	0.00131391	972/5641/3958/8764/3576/6348/6351	7
629	HLAII_Mac	GO:0048247	lymphocyte chemotaxis	5/125	64/18870	6.56473e-05	0.00172645	0.00140032	6347/414062/6348/6351/6355	5
630	HLAII_Mac	GO:0071216	cellular response to biotic stimulus	9/125	265/18870	6.86755e-05	0.00178556	0.00144826	6347/7538/3576/2920/1649/2213/3394/4360/2921	9
631	HLAII_Mac	GO:0043903	regulation of biological process involved in symbiotic interaction	5/125	65/18870	7.07434e-05	0.00181866	0.00147511	972/3123/3956/10410/3576	5
632	HLAII_Mac	GO:0070663	regulation of leukocyte proliferation	9/125	267/18870	7.27512e-05	0.0018495	0.00150012	972/3115/3123/3113/3958/10457/3109/8764/2213	9
633	HLAII_Mac	GO:0060213	positive regulation of nuclear-transcribed mRNA poly(A) tail shortening	3/125	13/18870	7.73161e-05	0.00194395	0.00157673	7538/7832/26986	3
634	HLAII_Mac	GO:0042116	macrophage activation	6/125	110/18870	9.14302e-05	0.00227383	0.00184429	972/1075/2896/6348/2213/712	6
635	HLAII_Mac	GO:0046598	positive regulation of viral entry into host cell	3/125	14/18870	9.79264e-05	0.00235848	0.00191296	972/3123/3956	3
636	HLAII_Mac	GO:0075294	positive regulation by symbiont of entry into host	3/125	14/18870	9.79264e-05	0.00235848	0.00191296	972/3123/3956	3
637	HLAII_Mac	GO:0098883	synapse pruning	3/125	14/18870	9.79264e-05	0.00235848	0.00191296	712/713/714	3
638	HLAII_Mac	GO:0044409	entry into host	7/125	163/18870	0.000107108	0.00255274	0.00207052	972/3123/3956/8764/10410/3576/4360	7
639	HLAII_Mac	GO:0032496	response to lipopolysaccharide	10/125	348/18870	0.000108592	0.00256142	0.00207756	6347/2353/7538/54/3576/2920/6648/3394/4360/2921	10
640	HLAII_Mac	GO:0070661	leukocyte proliferation	10/125	350/18870	0.000113814	0.0026572	0.00215525	972/3115/3123/3113/3958/10457/3109/8764/3726/2213	10
641	HLAII_Mac	GO:0001819	positive regulation of cytokine production	12/125	499/18870	0.000120561	0.00273251	0.00221633	972/3115/3113/1958/5144/8764/144811/6348/9308/1649/4063/3394	12
642	HLAII_Mac	GO:0060211	regulation of nuclear-transcribed mRNA poly(A) tail shortening	3/125	15/18870	0.000121816	0.00273251	0.00221633	7538/7832/26986	3
643	HLAII_Mac	GO:0090280	positive regulation of calcium ion import	3/125	15/18870	0.000121816	0.00273251	0.00221633	6347/3958/6348	3
644	HLAII_Mac	GO:1900153	positive regulation of nuclear-transcribed mRNA catabolic process, deadenylation-dependent decay	3/125	15/18870	0.000121816	0.00273251	0.00221633	7538/26986/677	3
645	HLAII_Mac	GO:0071677	positive regulation of mononuclear cell migration	5/125	73/18870	0.000123327	0.00273954	0.00222203	5641/3958/8764/6348/6351	5
646	HLAII_Mac	GO:0032609	type II interferon production	6/125	119/18870	0.000141131	0.00307531	0.00249438	3115/3123/3113/5144/1649/3394	6
647	HLAII_Mac	GO:0032649	regulation of type II interferon production	6/125	119/18870	0.000141131	0.00307531	0.00249438	3115/3123/3113/5144/1649/3394	6
648	HLAII_Mac	GO:0150077	regulation of neuroinflammatory response	4/125	41/18870	0.000153719	0.00331801	0.00269122	26471/1075/2896/6348	4
649	HLAII_Mac	GO:0072676	lymphocyte migration	6/125	124/18870	0.000176797	0.00378049	0.00306634	6347/8764/414062/6348/6351/6355	6
650	HLAII_Mac	GO:0071219	cellular response to molecule of bacterial origin	8/125	239/18870	0.000193999	0.0041099	0.00333353	6347/7538/3576/2920/2213/3394/4360/2921	8
651	HLAII_Mac	GO:0030217	T cell differentiation	9/125	307/18870	0.000208592	0.0043214	0.00350507	972/3122/3123/1958/3726/677/9308/9935/4063	9
652	HLAII_Mac	GO:0046651	lymphocyte proliferation	9/125	307/18870	0.000208592	0.0043214	0.00350507	972/3115/3123/3113/3958/10457/3109/8764/2213	9
653	HLAII_Mac	GO:0042129	regulation of T cell proliferation	7/125	182/18870	0.000211874	0.0043214	0.00350507	3115/3123/3113/3958/10457/3109/8764	7
654	HLAII_Mac	GO:0150076	neuroinflammatory response	5/125	82/18870	0.000213651	0.0043214	0.00350507	26471/1075/2896/6348/712	5
655	HLAII_Mac	GO:0090713	immunological memory process	3/125	18/18870	0.000215315	0.0043214	0.00350507	3122/3123/8764	3
656	HLAII_Mac	GO:0150078	positive regulation of neuroinflammatory response	3/125	18/18870	0.000215315	0.0043214	0.00350507	26471/1075/6348	3
657	HLAII_Mac	GO:1902107	positive regulation of leukocyte differentiation	7/125	185/18870	0.000234166	0.00459786	0.00372931	972/3122/3123/2353/677/9308/7071	7
658	HLAII_Mac	GO:1903708	positive regulation of hemopoiesis	7/125	185/18870	0.000234166	0.00459786	0.00372931	972/3122/3123/2353/677/9308/7071	7
659	HLAII_Mac	GO:0052547	regulation of peptidase activity	9/125	312/18870	0.000235118	0.00459786	0.00372931	5641/5176/1471/1520/7076/2896/1512/1509/1513	9
660	HLAII_Mac	GO:0019079	viral genome replication	6/125	131/18870	0.000238305	0.00462069	0.00374783	6347/26986/10410/3576/4599/6355	6
661	HLAII_Mac	GO:0070372	regulation of ERK1 and ERK2 cascade	9/125	313/18870	0.000240746	0.0046288	0.0037544	6347/972/3123/10457/8685/414062/6348/6351/6355	9
662	HLAII_Mac	GO:0032943	mononuclear cell proliferation	9/125	314/18870	0.000246485	0.00469965	0.00381187	972/3115/3123/3113/3958/10457/3109/8764/2213	9
663	HLAII_Mac	GO:0044000	movement in host	7/125	188/18870	0.000258312	0.00485083	0.00393449	972/3123/3956/8764/10410/3576/4360	7
664	HLAII_Mac	GO:0050868	negative regulation of T cell activation	6/125	133/18870	0.000258654	0.00485083	0.00393449	972/3123/3958/10457/8764/2213	6
665	HLAII_Mac	GO:0045655	regulation of monocyte differentiation	3/125	20/18870	0.000297909	0.00549691	0.00445853	972/3123/677	3
666	HLAII_Mac	GO:1903978	regulation of microglial cell activation	3/125	20/18870	0.000297909	0.00549691	0.00445853	1075/2896/6348	3
667	HLAII_Mac	GO:0001774	microglial cell activation	4/125	49/18870	0.000308733	0.00556206	0.00451137	1075/2896/6348/712	4
668	HLAII_Mac	GO:0036230	granulocyte activation	4/125	49/18870	0.000308733	0.00556206	0.00451137	2896/3576/6348/2213	4
669	HLAII_Mac	GO:0046596	regulation of viral entry into host cell	4/125	49/18870	0.000308733	0.00556206	0.00451137	972/3123/3956/10410	4
670	HLAII_Mac	GO:0043410	positive regulation of MAPK cascade	11/125	474/18870	0.000316546	0.00565826	0.00458939	6347/972/3123/10457/8685/414062/6348/9518/2213/6351/6355	11
671	HLAII_Mac	GO:0019083	viral transcription	4/125	51/18870	0.000360443	0.00639297	0.00518531	7538/10410/6348/6351	4
672	HLAII_Mac	GO:0043367	CD4-positive, alpha-beta T cell differentiation	5/125	93/18870	0.00038405	0.00675929	0.00548244	3122/3123/3726/9308/4063	5
673	HLAII_Mac	GO:0002269	leukocyte activation involved in inflammatory response	4/125	52/18870	0.000388493	0.00678528	0.00550351	1075/2896/6348/712	4
674	HLAII_Mac	GO:0002695	negative regulation of leukocyte activation	7/125	202/18870	0.000398917	0.00691457	0.00560838	972/3123/3958/10457/8764/2896/2213	7
675	HLAII_Mac	GO:2001235	positive regulation of apoptotic signaling pathway	6/125	145/18870	0.000411162	0.00707322	0.00573707	26471/1520/1075/1512/1649/1513	6
676	HLAII_Mac	GO:0045638	negative regulation of myeloid cell differentiation	5/125	95/18870	0.00042368	0.00723418	0.00586762	7538/6348/677/9935/714	5
677	HLAII_Mac	GO:0022408	negative regulation of cell-cell adhesion	7/125	205/18870	0.000435809	0.00738615	0.00599088	972/3123/3958/10457/53827/8764/2213	7
678	HLAII_Mac	GO:0002690	positive regulation of leukocyte chemotaxis	5/125	96/18870	0.000444615	0.00747999	0.00606699	972/5641/3576/6348/6351	5
679	HLAII_Mac	GO:0002455	humoral immune response mediated by circulating immunoglobulin	4/125	55/18870	0.000481987	0.00804953	0.00652895	2213/712/713/714	4
680	HLAII_Mac	GO:0002764	immune response-regulating signaling pathway	11/125	500/18870	0.000495974	0.0082231	0.00666973	3115/3123/3119/3958/1520/5144/4814/144811/2359/1512/2213	11
681	HLAII_Mac	GO:0043370	regulation of CD4-positive, alpha-beta T cell differentiation	4/125	56/18870	0.000516424	0.00835905	0.00678	3122/3123/3726/9308	4
682	HLAII_Mac	GO:0043525	positive regulation of neuron apoptotic process	4/125	56/18870	0.000516424	0.00835905	0.00678	26471/2896/6348/1649	4
683	HLAII_Mac	GO:0051701	biological process involved in interaction with host	7/125	211/18870	0.000517765	0.00835905	0.00678	972/3123/3956/8764/10410/3576/4360	7
684	HLAII_Mac	GO:1903902	positive regulation of viral life cycle	3/125	24/18870	0.000518787	0.00835905	0.00678	972/3123/3956	3
685	HLAII_Mac	GO:0050729	positive regulation of inflammatory response	6/125	152/18870	0.000528064	0.00839035	0.00680539	26471/1075/3956/2896/4814/6348	6
686	HLAII_Mac	GO:1903038	negative regulation of leukocyte cell-cell adhesion	6/125	152/18870	0.000528064	0.00839035	0.00680539	972/3123/3958/10457/8764/2213	6
687	HLAII_Mac	GO:0042098	T cell proliferation	7/125	213/18870	0.000547659	0.00864168	0.00700924	3115/3123/3113/3958/10457/3109/8764	7
688	HLAII_Mac	GO:0061900	glial cell activation	4/125	57/18870	0.000552576	0.00865954	0.00702373	1075/2896/6348/712	4
689	HLAII_Mac	GO:0008630	intrinsic apoptotic signaling pathway in response to DNA damage	5/125	102/18870	0.000587049	0.0091372	0.00741116	972/26471/8870/7178/6648	5
690	HLAII_Mac	GO:0046718	viral entry into host cell	6/125	156/18870	0.000605603	0.0093623	0.00759373	972/3123/3956/8764/10410/4360	6
691	HLAII_Mac	GO:0045639	positive regulation of myeloid cell differentiation	5/125	103/18870	0.000613767	0.00942483	0.00764445	972/3123/2353/677/7071	5
692	HLAII_Mac	GO:0031638	zymogen activation	4/125	59/18870	0.000630217	0.0096129	0.007797	5641/5328/1522/1512	4
693	HLAII_Mac	GO:1900151	regulation of nuclear-transcribed mRNA catabolic process, deadenylation-dependent decay	3/125	26/18870	0.000660018	0.009935	0.00805825	7538/26986/677	3
694	HLAII_Mac	GO:1901623	regulation of lymphocyte chemotaxis	3/125	26/18870	0.000660018	0.009935	0.00805825	6347/6348/6351	3
695	HLAII_Mac	GO:0071384	cellular response to corticosteroid stimulus	4/125	60/18870	0.000671801	0.0100463	0.00814851	7538/5176/6446/677	4
696	HLAII_Mac	GO:0030316	osteoclast differentiation	5/125	106/18870	0.000699409	0.0103912	0.00842828	2353/3726/6348/7071/9935	5
697	HLAII_Mac	GO:0050866	negative regulation of cell activation	7/125	223/18870	0.000718404	0.0106046	0.00860134	972/3123/3958/10457/8764/2896/2213	7
698	HLAII_Mac	GO:0150146	cell junction disassembly	3/125	27/18870	0.000738943	0.0108378	0.00879053	712/713/714	3
699	HLAII_Mac	GO:0002449	lymphocyte mediated immunity	9/125	368/18870	0.000776477	0.0112532	0.00912744	972/3122/3123/1075/1512/2213/712/713/714	9
700	HLAII_Mac	GO:0071222	cellular response to lipopolysaccharide	7/125	226/18870	0.000777101	0.0112532	0.00912744	6347/7538/3576/2920/3394/4360/2921	7
701	HLAII_Mac	GO:0048524	positive regulation of viral process	4/125	64/18870	0.000857695	0.0123211	0.0099936	972/3123/3956/26986	4
702	HLAII_Mac	GO:1902106	negative regulation of leukocyte differentiation	5/125	111/18870	0.000861615	0.0123211	0.0099936	972/6348/9935/2213/714	5
703	HLAII_Mac	GO:0050920	regulation of chemotaxis	7/125	232/18870	0.000905862	0.0128734	0.0104416	6347/972/5641/3576/6348/1843/6351	7
704	HLAII_Mac	GO:0010447	response to acidic pH	3/125	29/18870	0.000914241	0.0129122	0.0104731	5641/5176/1520	3
705	HLAII_Mac	GO:0051250	negative regulation of lymphocyte activation	6/125	169/18870	0.000920051	0.0129146	0.010475	972/3123/3958/10457/8764/2213	6
706	HLAII_Mac	GO:0010952	positive regulation of peptidase activity	6/125	170/18870	0.00094862	0.0132344	0.0107344	5641/1520/2896/1512/1509/1513	6
707	HLAII_Mac	GO:0006956	complement activation	4/125	67/18870	0.001019	0.0141301	0.0114609	1675/712/713/714	4
708	HLAII_Mac	GO:0046634	regulation of alpha-beta T cell activation	5/125	116/18870	0.00105033	0.0144769	0.0117421	3122/3123/8764/3726/9308	5
709	HLAII_Mac	GO:0043547	positive regulation of GTPase activity	7/125	239/18870	0.00107676	0.0147409	0.0119563	6347/23179/414062/6348/153020/6351/6355	7
710	HLAII_Mac	GO:0002443	leukocyte mediated immunity	10/125	466/18870	0.00108237	0.0147409	0.0119563	972/3122/3123/1075/1512/6348/2213/712/713/714	10
711	HLAII_Mac	GO:0007162	negative regulation of cell adhesion	8/125	312/18870	0.0011278	0.0148744	0.0120646	972/3123/3958/10457/53827/8764/1843/2213	8
712	HLAII_Mac	GO:0002274	myeloid leukocyte activation	7/125	241/18870	0.00112997	0.0148744	0.0120646	972/1075/2896/3576/6348/2213/712	7
713	HLAII_Mac	GO:1903707	negative regulation of hemopoiesis	5/125	118/18870	0.00113382	0.0148744	0.0120646	972/6348/9935/2213/714	5
714	HLAII_Mac	GO:0000288	nuclear-transcribed mRNA catabolic process, deadenylation-dependent decay	4/125	69/18870	0.00113768	0.0148744	0.0120646	7538/7832/26986/677	4
715	HLAII_Mac	GO:0045670	regulation of osteoclast differentiation	4/125	69/18870	0.00113768	0.0148744	0.0120646	2353/6348/7071/9935	4
716	HLAII_Mac	GO:0050918	positive chemotaxis	4/125	69/18870	0.00113768	0.0148744	0.0120646	3958/10457/3576/6348	4
717	HLAII_Mac	GO:2000401	regulation of lymphocyte migration	4/125	69/18870	0.00113768	0.0148744	0.0120646	6347/8764/6348/6351	4
718	HLAII_Mac	GO:0035710	CD4-positive, alpha-beta T cell activation	5/125	119/18870	0.00117735	0.0153056	0.0124143	3122/3123/3726/9308/4063	5
719	HLAII_Mac	GO:0002757	immune response-activating signaling pathway	10/125	473/18870	0.00121042	0.0156348	0.0126813	3115/3123/3119/3958/1520/5144/4814/144811/2359/2213	10
720	HLAII_Mac	GO:0002313	mature B cell differentiation involved in immune response	3/125	32/18870	0.00122318	0.0156348	0.0126813	3956/2213/3394	3
721	HLAII_Mac	GO:0019883	antigen processing and presentation of endogenous antigen	3/125	32/18870	0.00122318	0.0156348	0.0126813	972/3122/3123	3
722	HLAII_Mac	GO:0002429	immune response-activating cell surface receptor signaling pathway	8/125	318/18870	0.00127323	0.0161841	0.0131269	3115/3123/3119/3958/5144/4814/2359/2213	8
723	HLAII_Mac	GO:0046631	alpha-beta T cell activation	6/125	181/18870	0.00131007	0.0165605	0.0134322	3122/3123/8764/3726/9308/4063	6
724	HLAII_Mac	GO:0090279	regulation of calcium ion import	3/125	33/18870	0.00133902	0.0168334	0.0136535	6347/3958/6348	3
725	HLAII_Mac	GO:0071774	response to fibroblast growth factor	5/125	123/18870	0.00136398	0.0170535	0.013832	6347/7538/9592/3576/677	5
726	HLAII_Mac	GO:0035914	skeletal muscle cell differentiation	4/125	73/18870	0.00140355	0.0173585	0.0140794	2353/26471/1958/7832	4
727	HLAII_Mac	GO:0042093	T-helper cell differentiation	4/125	73/18870	0.00140355	0.0173585	0.0140794	3122/3123/3726/4063	4
728	HLAII_Mac	GO:0046632	alpha-beta T cell differentiation	5/125	124/18870	0.00141386	0.0173921	0.0141066	3122/3123/3726/9308/4063	5
729	HLAII_Mac	GO:0000289	nuclear-transcribed mRNA poly(A) tail shortening	3/125	34/18870	0.00146155	0.0177873	0.0144272	7538/7832/26986	3
730	HLAII_Mac	GO:0043372	positive regulation of CD4-positive, alpha-beta T cell differentiation	3/125	34/18870	0.00146155	0.0177873	0.0144272	3122/3123/9308	3
731	HLAII_Mac	GO:0046637	regulation of alpha-beta T cell differentiation	4/125	74/18870	0.00147623	0.017871	0.0144951	3122/3123/3726/9308	4
732	HLAII_Mac	GO:0002294	CD4-positive, alpha-beta T cell differentiation involved in immune response	4/125	75/18870	0.0015515	0.0186834	0.015154	3122/3123/3726/4063	4
733	HLAII_Mac	GO:0030224	monocyte differentiation	3/125	35/18870	0.00159088	0.0187626	0.0152183	972/3123/677	3
734	HLAII_Mac	GO:0032633	interleukin-4 production	3/125	35/18870	0.00159088	0.0187626	0.0152183	3123/9308/1649	3
735	HLAII_Mac	GO:0032673	regulation of interleukin-4 production	3/125	35/18870	0.00159088	0.0187626	0.0152183	3123/9308/1649	3
736	HLAII_Mac	GO:0048147	negative regulation of fibroblast proliferation	3/125	35/18870	0.00159088	0.0187626	0.0152183	26471/10437/6648	3
737	HLAII_Mac	GO:0002287	alpha-beta T cell activation involved in immune response	4/125	76/18870	0.0016294	0.0190208	0.0154277	3122/3123/3726/4063	4
738	HLAII_Mac	GO:0002293	alpha-beta T cell differentiation involved in immune response	4/125	76/18870	0.0016294	0.0190208	0.0154277	3122/3123/3726/4063	4
739	HLAII_Mac	GO:2001242	regulation of intrinsic apoptotic signaling pathway	6/125	190/18870	0.00167725	0.0194561	0.0157807	972/26471/7178/1649/6648/2213	6
740	HLAII_Mac	GO:0002456	T cell mediated immunity	5/125	129/18870	0.0016837	0.0194561	0.0157807	3122/3123/1075/1512/2213	5
741	HLAII_Mac	GO:0032729	positive regulation of type II interferon production	4/125	77/18870	0.00170998	0.0196605	0.0159466	3115/3113/5144/3394	4
742	HLAII_Mac	GO:2000514	regulation of CD4-positive, alpha-beta T cell activation	4/125	78/18870	0.00179329	0.0205152	0.0166398	3122/3123/3726/9308	4
743	HLAII_Mac	GO:0002291	T cell activation via T cell receptor contact with antigen bound to MHC molecule on antigen presenting cell	2/125	10/18870	0.00189199	0.0213245	0.0172962	3958/3109	2
744	HLAII_Mac	GO:0002361	CD4-positive, CD25-positive, alpha-beta regulatory T cell differentiation	2/125	10/18870	0.00189199	0.0213245	0.0172962	3122/3123	2
745	HLAII_Mac	GO:1903980	positive regulation of microglial cell activation	2/125	10/18870	0.00189199	0.0213245	0.0172962	1075/6348	2
746	HLAII_Mac	GO:0002335	mature B cell differentiation	3/125	38/18870	0.00202112	0.0226682	0.0183861	3956/2213/3394	3
747	HLAII_Mac	GO:0002768	immune response-regulating cell surface receptor signaling pathway	8/125	346/18870	0.00216162	0.0241257	0.0195683	3115/3123/3119/3958/5144/4814/2359/2213	8
748	HLAII_Mac	GO:0043434	response to peptide hormone	9/125	430/18870	0.00227353	0.0252304	0.0204643	2353/1958/7832/55022/7076/1509/677/9518/1513	9
749	HLAII_Mac	GO:0050728	negative regulation of inflammatory response	6/125	202/18870	0.00228265	0.0252304	0.0204643	3123/7538/8870/54/2896/2213	6
750	HLAII_Mac	GO:0002604	regulation of dendritic cell antigen processing and presentation	2/125	11/18870	0.00230242	0.0253266	0.0205423	972/2213	2
751	HLAII_Mac	GO:0045862	positive regulation of proteolysis	8/125	350/18870	0.00232079	0.0254065	0.0206071	5641/26471/1520/1075/2896/1512/1509/1513	8
752	HLAII_Mac	GO:0002292	T cell differentiation involved in immune response	4/125	84/18870	0.00235303	0.0256369	0.020794	3122/3123/3726/4063	4
753	HLAII_Mac	GO:0001909	leukocyte mediated cytotoxicity	5/125	140/18870	0.00240804	0.0261119	0.0211793	3122/3123/1075/1512/2213	5
754	HLAII_Mac	GO:0045069	regulation of viral genome replication	4/125	85/18870	0.00245675	0.0263913	0.0214059	26986/10410/3576/4599	4
755	HLAII_Mac	GO:0050851	antigen receptor-mediated signaling pathway	6/125	205/18870	0.00245688	0.0263913	0.0214059	3115/3123/3119/3958/5144/2213	6
756	HLAII_Mac	GO:0048246	macrophage chemotaxis	3/125	41/18870	0.00251735	0.0269145	0.0218303	6347/3958/6348	3
757	HLAII_Mac	GO:0006958	complement activation, classical pathway	3/125	42/18870	0.00269799	0.0281873	0.0228626	712/713/714	3
758	HLAII_Mac	GO:0009268	response to pH	3/125	42/18870	0.00269799	0.0281873	0.0228626	5641/5176/1520	3
759	HLAII_Mac	GO:0042119	neutrophil activation	3/125	42/18870	0.00269799	0.0281873	0.0228626	2896/3576/2213	3
760	HLAII_Mac	GO:0071364	cellular response to epidermal growth factor stimulus	3/125	42/18870	0.00269799	0.0281873	0.0228626	2353/7538/677	3
761	HLAII_Mac	GO:2000403	positive regulation of lymphocyte migration	3/125	42/18870	0.00269799	0.0281873	0.0228626	8764/6348/6351	3
762	HLAII_Mac	GO:0050852	T cell receptor signaling pathway	5/125	144/18870	0.00272042	0.0282924	0.0229479	3115/3123/3119/3958/5144	5
763	HLAII_Mac	GO:0040015	negative regulation of multicellular organism growth	2/125	12/18870	0.00275095	0.0283521	0.0229963	5641/9518	2
764	HLAII_Mac	GO:0043380	regulation of memory T cell differentiation	2/125	12/18870	0.00275095	0.0283521	0.0229963	3122/3123	2
765	HLAII_Mac	GO:0050672	negative regulation of lymphocyte proliferation	4/125	88/18870	0.00278669	0.0285917	0.0231906	3123/10457/8764/2213	4
766	HLAII_Mac	GO:0050921	positive regulation of chemotaxis	5/125	145/18870	0.0028029	0.0286296	0.0232214	972/5641/3576/6348/6351	5
767	HLAII_Mac	GO:0045622	regulation of T-helper cell differentiation	3/125	43/18870	0.00288644	0.0291327	0.0236294	3122/3123/3726	3
768	HLAII_Mac	GO:0045619	regulation of lymphocyte differentiation	6/125	212/18870	0.00290225	0.0291327	0.0236294	972/3122/3123/3726/677/9308	6
769	HLAII_Mac	GO:0032945	negative regulation of mononuclear cell proliferation	4/125	89/18870	0.00290308	0.0291327	0.0236294	3123/10457/8764/2213	4
770	HLAII_Mac	GO:0048145	regulation of fibroblast proliferation	4/125	89/18870	0.00290308	0.0291327	0.0236294	972/26471/10437/6648	4
771	HLAII_Mac	GO:2000516	positive regulation of CD4-positive, alpha-beta T cell activation	3/125	44/18870	0.00308279	0.030801	0.0249826	3122/3123/9308	3
772	HLAII_Mac	GO:0031960	response to corticosteroid	5/125	149/18870	0.00315098	0.0313454	0.0254241	2353/7538/5176/6446/677	5
773	HLAII_Mac	GO:0006596	polyamine biosynthetic process	2/125	13/18870	0.00323706	0.0316513	0.0256723	6303/6611	2
774	HLAII_Mac	GO:0008298	intracellular mRNA localization	2/125	13/18870	0.00323706	0.0316513	0.0256723	7538/677	2
775	HLAII_Mac	GO:0043379	memory T cell differentiation	2/125	13/18870	0.00323706	0.0316513	0.0256723	3122/3123	2
776	HLAII_Mac	GO:0051764	actin crosslink formation	2/125	13/18870	0.00323706	0.0316513	0.0256723	4082/283431	2
777	HLAII_Mac	GO:0030574	collagen catabolic process	3/125	45/18870	0.00328716	0.0320044	0.0259587	1471/1520/1513	3
778	HLAII_Mac	GO:0042594	response to starvation	6/125	218/18870	0.00332993	0.0322834	0.0261849	2353/7538/7071/1649/123/1513	6
779	HLAII_Mac	GO:0045646	regulation of erythrocyte differentiation	3/125	46/18870	0.00349966	0.0336437	0.0272883	7538/677/9935	3
780	HLAII_Mac	GO:0070849	response to epidermal growth factor	3/125	46/18870	0.00349966	0.0336437	0.0272883	2353/7538/677	3
781	HLAII_Mac	GO:0030183	B cell differentiation	5/125	153/18870	0.00352923	0.0337861	0.0274038	3956/1316/677/2213/3394	5
782	HLAII_Mac	GO:0003073	regulation of systemic arterial blood pressure	4/125	95/18870	0.003672	0.0350064	0.0283936	8870/1522/5144/6648	4
783	HLAII_Mac	GO:0003044	regulation of systemic arterial blood pressure mediated by a chemical signal	3/125	47/18870	0.00372037	0.0351162	0.0284826	1522/5144/6648	3
784	HLAII_Mac	GO:0001906	cell killing	6/125	223/18870	0.00372085	0.0351162	0.0284826	3122/3123/1075/4814/1512/2213	6
785	HLAII_Mac	GO:0043922	negative regulation by host of viral transcription	2/125	14/18870	0.00376025	0.0351162	0.0284826	6348/6351	2
786	HLAII_Mac	GO:0070341	fat cell proliferation	2/125	14/18870	0.00376025	0.0351162	0.0284826	55022/8878	2
787	HLAII_Mac	GO:0090715	immunological memory formation process	2/125	14/18870	0.00376025	0.0351162	0.0284826	3122/3123	2
788	HLAII_Mac	GO:0070664	negative regulation of leukocyte proliferation	4/125	96/18870	0.00381232	0.0354577	0.0287596	3123/10457/8764/2213	4
789	HLAII_Mac	GO:0002181	cytoplasmic translation	5/125	156/18870	0.00383357	0.035511	0.0288028	6234/6136/26986/6144/6176	5
790	HLAII_Mac	GO:0070509	calcium ion import	3/125	48/18870	0.00394939	0.0364363	0.0295534	6347/3958/6348	3
791	HLAII_Mac	GO:0032897	negative regulation of viral transcription	2/125	15/18870	0.00432001	0.0395368	0.0320681	7538/10410	2
792	HLAII_Mac	GO:1902563	regulation of neutrophil activation	2/125	15/18870	0.00432001	0.0395368	0.0320681	2896/2213	2
793	HLAII_Mac	GO:0043087	regulation of GTPase activity	7/125	307/18870	0.00438714	0.0399912	0.0324367	6347/23179/414062/6348/153020/6351/6355	7
794	HLAII_Mac	GO:0001914	regulation of T cell mediated cytotoxicity	3/125	50/18870	0.00443276	0.0400876	0.0325149	3122/3123/2213	3
795	HLAII_Mac	GO:0071385	cellular response to glucocorticoid stimulus	3/125	50/18870	0.00443276	0.0400876	0.0325149	7538/5176/677	3
796	HLAII_Mac	GO:0043524	negative regulation of neuron apoptotic process	5/125	163/18870	0.00461621	0.0415822	0.0337272	6347/5641/7832/2896/6648	5
797	HLAII_Mac	GO:0019080	viral gene expression	4/125	102/18870	0.00473119	0.0424508	0.0344317	7538/10410/6348/6351	4
798	HLAII_Mac	GO:0032102	negative regulation of response to external stimulus	9/125	481/18870	0.00475373	0.0424865	0.0344607	6347/3123/7538/5328/8870/54/2896/1843/2213	9
799	HLAII_Mac	GO:0051770	positive regulation of nitric-oxide synthase biosynthetic process	2/125	16/18870	0.00491584	0.0437644	0.0354972	6347/10135	2
800	HLAII_Mac	GO:0046638	positive regulation of alpha-beta T cell differentiation	3/125	52/18870	0.00495047	0.0439018	0.0356086	3122/3123/9308	3
801	HLAII_Mac	GO:0002762	negative regulation of myeloid leukocyte differentiation	3/125	53/18870	0.00522241	0.0461347	0.0374197	6348/9935/714	3
802	HLAII_Mac	GO:0097193	intrinsic apoptotic signaling pathway	7/125	319/18870	0.00539239	0.047453	0.038489	972/26471/8870/7178/1649/6648/2213	7
803	HLAII_Mac	GO:0097067	cellular response to thyroid hormone stimulus	2/125	17/18870	0.00554725	0.0484432	0.0392921	1520/1512	2
804	HLAII_Mac	GO:0110096	cellular response to aldehyde	2/125	17/18870	0.00554725	0.0484432	0.0392921	6446/216	2
805	HLAII_Mac	GO:0048144	fibroblast proliferation	4/125	107/18870	0.00560225	0.0487375	0.0395308	972/26471/10437/6648	4
806	HLAII_Mac	GO:0031667	response to nutrient levels	9/125	495/18870	0.00571158	0.0495004	0.0401496	2353/7538/2350/7071/1649/6648/9518/123/1513	9
807	Mac_T	GO:0033044	regulation of chromosome organization	41/479	247/18870	6.69862e-22	2.18847e-18	1.81647e-18	1063/7153/10576/6599/3178/6950/10051/10592/5925/57082/3184/23310/140609/6597/9031/80063/54892/5885/7203/22948/10574/908/7520/10856/3181/605/10459/55755/10575/10664/26354/201161/64151/6605/23137/701/1062/9184/5588/990/142	41
808	Mac_T	GO:0006260	DNA replication	43/479	278/18870	1.122e-21	2.18847e-18	1.81647e-18	4678/1854/9768/253714/5111/6241/10189/6418/4176/11124/79915/6749/4172/51053/5983/3399/51514/5558/7270/1111/4173/11198/5928/374393/6240/55388/10856/11073/5422/64710/5932/641/51659/7150/10036/3159/5425/4175/23594/7486/990/142/672	43
809	Mac_T	GO:0051054	positive regulation of DNA metabolic process	42/479	298/18870	1.25074e-19	1.62638e-16	1.34992e-16	3320/9760/3146/3326/10576/6599/3178/5111/6950/5591/11124/79915/7468/6188/7398/3184/140609/5983/3182/5558/6597/165918/7203/22948/10574/908/7520/10856/3181/2521/605/10459/10575/10728/3014/26354/23347/6605/7486/5588/142/672	42
810	Mac_T	GO:0007059	chromosome segregation	49/479	424/18870	5.4058e-19	5.272e-16	4.37585e-16	3304/203068/1063/7153/4288/6599/10051/10592/5925/51203/83990/401541/5901/6188/57082/10726/23310/22974/140609/259266/6597/79682/9031/54892/5885/6732/1731/605/10459/51759/55755/10664/79019/64105/9928/7150/9232/64151/6605/10388/23137/701/1062/113130/9184/990/56852/84057/672	49
811	Mac_T	GO:0006310	DNA recombination	41/479	340/18870	1.03681e-16	8.08922e-14	6.71419e-14	51176/3329/3148/3146/64919/7153/253714/3009/5591/10189/3007/4176/83990/79915/7468/4172/1111/4173/5885/165918/7520/6421/29128/10856/2521/10459/11073/64710/5932/641/23028/51659/3014/23347/4175/23137/7486/142/3149/84057/672	41
812	Mac_T	GO:0071897	DNA biosynthetic process	31/479	194/18870	2.36834e-16	1.53982e-13	1.27807e-13	3320/7298/1063/9768/3326/10576/3178/5111/6950/7398/3184/140609/5983/51514/55651/1111/7203/6240/22948/10574/908/7520/3181/10459/5422/10575/10728/1032/5425/7486/5588	31
813	Mac_T	GO:0000377	RNA splicing, via transesterification reactions with bulged adenosine as nucleophile	39/479	332/18870	1.45315e-15	7.08592e-13	5.88143e-13	6636/6635/3178/6628/10189/6632/7307/5411/708/6633/6428/4691/11168/220988/6733/6732/5935/3187/10236/6421/3181/6427/51759/58155/6634/23028/27336/51747/4670/27316/51690/5936/6637/10772/57819/4116/4809/6434/3312	39
814	Mac_T	GO:0000398	mRNA splicing, via spliceosome	39/479	332/18870	1.45315e-15	7.08592e-13	5.88143e-13	6636/6635/3178/6628/10189/6632/7307/5411/708/6633/6428/4691/11168/220988/6733/6732/5935/3187/10236/6421/3181/6427/51759/58155/6634/23028/27336/51747/4670/27316/51690/5936/6637/10772/57819/4116/4809/6434/3312	39
815	Mac_T	GO:0000375	RNA splicing, via transesterification reactions	39/479	336/18870	2.17382e-15	9.42229e-13	7.82066e-13	6636/6635/3178/6628/10189/6632/7307/5411/708/6633/6428/4691/11168/220988/6733/6732/5935/3187/10236/6421/3181/6427/51759/58155/6634/23028/27336/51747/4670/27316/51690/5936/6637/10772/57819/4116/4809/6434/3312	39
816	Mac_T	GO:0034502	protein localization to chromosome	24/479	119/18870	2.7093e-15	1.0569e-12	8.77244e-13	51176/8364/10576/2146/253714/6950/3009/5925/57082/5885/7203/22948/10574/908/7520/7443/10856/10575/10664/26354/23137/701/9184/142	24
817	Mac_T	GO:2001252	positive regulation of chromosome organization	23/479	109/18870	3.66414e-15	1.29944e-12	1.07856e-12	10576/3178/6950/10051/10592/3184/23310/140609/80063/54892/5885/7203/22948/10574/908/7520/10856/3181/10575/26354/64151/23137/5588	23
818	Mac_T	GO:0008380	RNA splicing	46/479	478/18870	7.87197e-15	2.55905e-12	2.12405e-12	6636/6635/3178/6628/10189/6632/7307/5411/708/6633/6428/4691/2334/11168/220988/6733/6732/5935/3276/3187/10236/6421/3181/2521/6427/51759/58155/6634/23028/27336/51747/4670/284695/27316/51690/5936/6637/8148/10772/57819/4116/4809/6434/3312/10915/9295	46
819	Mac_T	GO:0006302	double-strand break repair	36/479	307/18870	1.97155e-14	5.91617e-12	4.91052e-12	3148/3146/253714/6599/5591/4176/83990/7468/4172/6597/1111/4173/5885/165918/7520/6421/29128/10856/2521/605/10459/5422/64710/5932/641/23028/51659/3014/23347/4175/6605/23137/7486/113130/142/672	36
820	Mac_T	GO:0000723	telomere maintenance	26/479	156/18870	2.28803e-14	6.37544e-12	5.29172e-12	3320/3326/10576/3178/5111/6950/5591/3184/140609/55651/7203/22948/10574/908/7520/10856/3181/10459/10575/641/10728/26354/23137/7486/5588/142	26
821	Mac_T	GO:0098813	nuclear chromosome segregation	36/479	312/18870	3.2521e-14	8.45763e-12	7.01998e-12	3304/1063/7153/6599/10051/10592/5925/51203/83990/5901/57082/10726/23310/22974/259266/6597/9031/54892/5885/1731/605/10459/51759/55755/64105/9928/9232/64151/6605/10388/701/1062/113130/9184/990/84057	36
822	Mac_T	GO:0032200	telomere organization	28/479	187/18870	3.73961e-14	9.11765e-12	7.5678e-12	3320/8364/3326/10576/2146/3178/5111/6950/5591/3184/140609/55651/7203/22948/10574/908/7520/10856/3181/10459/10575/641/10728/26354/23137/7486/5588/142	28
823	Mac_T	GO:0006261	DNA-templated DNA replication	26/479	161/18870	4.969e-14	1.14024e-11	9.46418e-12	253714/5111/10189/4176/79915/4172/51053/5983/5558/4173/6240/55388/11073/5422/64710/5932/641/51659/3159/5425/4175/23594/7486/990/142/672	26
824	Mac_T	GO:0051983	regulation of chromosome segregation	23/479	131/18870	2.34612e-13	5.08456e-11	4.22027e-11	1063/4288/6599/10051/10592/5925/57082/23310/6597/54892/5885/605/10459/51759/55755/64151/6605/23137/701/1062/9184/990/56852	23
825	Mac_T	GO:1904874	positive regulation of telomerase RNA localization to Cajal body	10/479	15/18870	2.71341e-13	5.57107e-11	4.62408e-11	10576/6950/55651/7203/22948/10574/908/10856/10575/55164	10
826	Mac_T	GO:0022618	protein-RNA complex assembly	30/479	235/18870	3.38975e-13	6.6117e-11	5.48782e-11	3320/6636/3326/6635/6628/5591/3921/6632/6193/6633/11168/6733/6732/7520/10856/6223/58155/6634/6175/6152/6209/10480/27336/10728/51747/6637/10772/57819/4809/55164	30
827	Mac_T	GO:0000819	sister chromatid segregation	29/479	225/18870	6.62422e-13	1.23053e-10	1.02136e-10	3304/1063/7153/6599/10051/10592/5925/51203/5901/57082/10726/23310/22974/6597/9031/54892/5885/605/10459/55755/64105/9928/64151/6605/701/1062/113130/9184/990	29
828	Mac_T	GO:0071826	protein-RNA complex organization	30/479	243/18870	8.19855e-13	1.45375e-10	1.20664e-10	3320/6636/3326/6635/6628/5591/3921/6632/6193/6633/11168/6733/6732/7520/10856/6223/58155/6634/6175/6152/6209/10480/27336/10728/51747/6637/10772/57819/4809/55164	30
829	Mac_T	GO:2000573	positive regulation of DNA biosynthetic process	17/479	69/18870	1.00717e-12	1.70825e-10	1.41787e-10	3320/3326/10576/3178/5111/6950/7398/140609/5983/7203/22948/10574/908/7520/10575/10728/5588	17
830	Mac_T	GO:1904872	regulation of telomerase RNA localization to Cajal body	10/479	18/18870	3.69192e-12	6.00091e-10	4.98086e-10	10576/6950/55651/7203/22948/10574/908/10856/10575/55164	10
831	Mac_T	GO:0044772	mitotic cell cycle phase transition	41/479	470/18870	6.00429e-12	9.36909e-10	7.7765e-10	1021/27338/1063/63967/2146/6599/6241/5591/5925/79915/6194/79621/57082/896/51514/6597/1111/5885/23236/5721/6240/605/10459/11073/55755/5932/6152/641/1032/9928/5720/6605/1739/23137/701/1062/113130/1163/9184/990/672	41
832	Mac_T	GO:1901990	regulation of mitotic cell cycle phase transition	35/479	355/18870	7.47313e-12	9.90602e-10	8.22216e-10	1021/1063/63967/2146/6599/6241/5591/5925/79915/79621/57082/51514/6597/1111/5885/23236/5721/6240/605/10459/11073/55755/5932/641/1032/9928/5720/6605/1739/701/1062/113130/9184/990/672	35
833	Mac_T	GO:0090670	RNA localization to Cajal body	10/479	19/18870	7.61807e-12	9.90602e-10	8.22216e-10	10576/6950/55651/7203/22948/10574/908/10856/10575/55164	10
834	Mac_T	GO:0090671	telomerase RNA localization to Cajal body	10/479	19/18870	7.61807e-12	9.90602e-10	8.22216e-10	10576/6950/55651/7203/22948/10574/908/10856/10575/55164	10
835	Mac_T	GO:0090672	telomerase RNA localization	10/479	19/18870	7.61807e-12	9.90602e-10	8.22216e-10	10576/6950/55651/7203/22948/10574/908/10856/10575/55164	10
836	Mac_T	GO:0090685	RNA localization to nucleus	10/479	19/18870	7.61807e-12	9.90602e-10	8.22216e-10	10576/6950/55651/7203/22948/10574/908/10856/10575/55164	10
837	Mac_T	GO:1901987	regulation of cell cycle phase transition	40/479	456/18870	9.26595e-12	1.16602e-09	9.67812e-10	1021/1063/63967/2146/6599/6241/5591/5925/83990/79915/79621/57082/51514/6597/1111/5885/23236/5721/6240/605/10459/11073/55755/5932/641/3014/79968/1032/9928/493/5720/6605/1739/701/1062/1407/113130/9184/990/672	40
838	Mac_T	GO:0000280	nuclear division	39/479	441/18870	1.33158e-11	1.62328e-09	1.34735e-09	3304/27338/1063/5902/7153/4288/10051/10592/5925/51203/83990/5901/57082/10726/23310/22974/8815/259266/9031/1111/54892/5885/23236/1731/10459/51759/55755/6152/64105/9928/9232/64151/10388/701/1062/113130/9184/9585/84057	39
839	Mac_T	GO:0071103	DNA conformation change	18/479	92/18870	1.44997e-11	1.66768e-09	1.3842e-09	3148/3146/7153/4176/83990/4172/5983/4173/7520/10856/3181/641/51659/7150/3159/4175/7486/3149	18
840	Mac_T	GO:2000278	regulation of DNA biosynthetic process	20/479	117/18870	1.4535e-11	1.66768e-09	1.3842e-09	3320/3326/10576/3178/5111/6950/7398/3184/140609/5983/1111/7203/22948/10574/908/7520/3181/10575/10728/5588	20
841	Mac_T	GO:0010833	telomere maintenance via telomere lengthening	17/479	81/18870	1.63836e-11	1.82607e-09	1.51567e-09	3320/3326/10576/3178/6950/140609/55651/7203/22948/10574/908/7520/3181/10575/10728/5588/142	17
842	Mac_T	GO:0140014	mitotic nuclear division	30/479	274/18870	1.80989e-11	1.96122e-09	1.62785e-09	3304/27338/1063/5902/4288/10051/10592/5925/51203/5901/57082/10726/23310/22974/8815/9031/1111/54892/5885/10459/55755/6152/64105/9928/64151/701/1062/113130/9184/9585	30
843	Mac_T	GO:0000725	recombinational repair	24/479	179/18870	2.86098e-11	3.0164e-09	2.50367e-09	253714/4176/4172/1111/4173/5885/7520/6421/29128/10856/2521/10459/64710/5932/641/23028/51659/3014/23347/4175/23137/7486/142/672	24
844	Mac_T	GO:0032392	DNA geometric change	17/479	85/18870	3.70988e-11	3.80849e-09	3.16111e-09	3148/3146/7153/4176/83990/4172/5983/4173/7520/10856/3181/641/51659/3159/4175/7486/3149	17
845	Mac_T	GO:1904358	positive regulation of telomere maintenance via telomere lengthening	12/479	37/18870	6.5002e-11	6.50187e-09	5.39666e-09	10576/3178/6950/140609/7203/22948/10574/908/7520/3181/10575/5588	12
846	Mac_T	GO:1904816	positive regulation of protein localization to chromosome, telomeric region	8/479	12/18870	7.36646e-11	7.18414e-09	5.96296e-09	10576/6950/7203/22948/10574/908/10575/26354	8
847	Mac_T	GO:0000724	double-strand break repair via homologous recombination	23/479	175/18870	1.11994e-10	1.06558e-08	8.84452e-09	253714/4176/4172/1111/4173/5885/6421/29128/10856/2521/10459/64710/5932/641/23028/51659/3014/23347/4175/23137/7486/142/672	23
848	Mac_T	GO:0007004	telomere maintenance via telomerase	15/479	69/18870	1.51875e-10	1.41063e-08	1.17084e-08	3320/3326/10576/3178/6950/140609/55651/7203/22948/10574/908/7520/10575/10728/5588	15
849	Mac_T	GO:0032206	positive regulation of telomere maintenance	15/479	70/18870	1.88848e-10	1.71324e-08	1.42202e-08	10576/3178/6950/3184/140609/7203/22948/10574/908/7520/10856/3181/10575/26354/5588	15
850	Mac_T	GO:0048285	organelle fission	39/479	488/18870	2.73567e-10	2.42542e-08	2.01314e-08	3304/27338/1063/5902/7153/4288/10051/10592/5925/51203/83990/5901/57082/10726/23310/22974/8815/259266/9031/1111/54892/5885/23236/1731/10459/51759/55755/6152/64105/9928/9232/64151/10388/701/1062/113130/9184/9585/84057	39
851	Mac_T	GO:0030217	T cell differentiation	30/479	307/18870	3.0381e-10	2.63247e-08	2.18499e-08	915/1021/6659/51176/917/9760/100/6932/3932/916/23240/3146/6935/64919/814/387357/861/6599/4602/1840/5591/6194/7001/8503/399/7535/914/6597/6605/2625	30
852	Mac_T	GO:0000070	mitotic sister chromatid segregation	23/479	184/18870	3.10417e-10	2.63247e-08	2.18499e-08	3304/1063/10051/10592/5925/51203/5901/57082/10726/23310/22974/9031/54892/5885/10459/55755/64105/9928/64151/701/1062/113130/9184	23
853	Mac_T	GO:0030098	lymphocyte differentiation	36/479	429/18870	3.62078e-10	3.00525e-08	2.4944e-08	915/1021/6659/51176/917/9760/100/6932/3932/9759/916/23240/9452/3146/6935/64919/814/387357/2146/861/6599/4602/1840/5591/3676/9678/6194/7001/8503/399/7535/914/6597/7163/6605/2625	36
854	Mac_T	GO:0032212	positive regulation of telomere maintenance via telomerase	11/479	34/18870	4.24815e-10	3.40184e-08	2.82358e-08	10576/3178/6950/140609/7203/22948/10574/908/7520/10575/5588	11
855	Mac_T	GO:1904814	regulation of protein localization to chromosome, telomeric region	8/479	14/18870	4.27301e-10	3.40184e-08	2.82358e-08	10576/6950/7203/22948/10574/908/10575/26354	8
856	Mac_T	GO:0002181	cytoplasmic translation	21/479	156/18870	4.64682e-10	3.62545e-08	3.00918e-08	3921/6193/6194/6188/3184/200916/6218/6201/6187/6227/6223/6222/6175/6152/6209/10480/6189/5936/11224/6142/4736	21
857	Mac_T	GO:0006278	RNA-templated DNA biosynthetic process	15/479	75/18870	5.31234e-10	3.98528e-08	3.30785e-08	3320/3326/10576/3178/6950/140609/55651/7203/22948/10574/908/7520/10575/10728/5588	15
858	Mac_T	GO:0061077	chaperone-mediated protein folding	15/479	75/18870	5.31234e-10	3.98528e-08	3.30785e-08	3337/3304/10808/3310/3336/10576/6950/26973/7203/22948/10574/908/10575/10728/3312	15
859	Mac_T	GO:1904851	positive regulation of establishment of protein localization to telomere	7/479	10/18870	7.30548e-10	5.37711e-08	4.46309e-08	10576/6950/7203/22948/10574/908/10575	7
860	Mac_T	GO:0032204	regulation of telomere maintenance	17/479	104/18870	1.02384e-09	7.39629e-08	6.13904e-08	10576/3178/6950/3184/140609/7203/22948/10574/908/7520/10856/3181/10575/26354/23137/5588/142	17
861	Mac_T	GO:0006270	DNA replication initiation	11/479	37/18870	1.1851e-09	8.40559e-08	6.97678e-08	4176/4172/51053/5558/4173/55388/11073/5422/4175/23594/990	11
862	Mac_T	GO:0045814	negative regulation of gene expression, epigenetic	18/479	120/18870	1.39369e-09	9.70853e-08	8.05824e-08	9759/3146/3070/2146/5925/4001/3065/80063/1111/29128/22955/1786/10664/23028/23347/201161/11335/672	18
863	Mac_T	GO:0030261	chromosome condensation	12/479	47/18870	1.4559e-09	9.96398e-08	8.27027e-08	7153/10051/3009/10592/51203/3007/23310/9031/54892/64151/23137/113130	12
864	Mac_T	GO:0070203	regulation of establishment of protein localization to telomere	7/479	11/18870	1.96506e-09	1.27762e-07	1.06044e-07	10576/6950/7203/22948/10574/908/10575	7
865	Mac_T	GO:1904869	regulation of protein localization to Cajal body	7/479	11/18870	1.96506e-09	1.27762e-07	1.06044e-07	10576/6950/7203/22948/10574/908/10575	7
866	Mac_T	GO:1904871	positive regulation of protein localization to Cajal body	7/479	11/18870	1.96506e-09	1.27762e-07	1.06044e-07	10576/6950/7203/22948/10574/908/10575	7
867	Mac_T	GO:0006457	protein folding	24/479	223/18870	2.76934e-09	1.77101e-07	1.46997e-07	3337/3304/3320/3329/10808/3310/3336/3326/10576/6950/9531/10726/26973/3301/7203/22948/10574/908/10856/10598/10575/10728/4820/3312	24
868	Mac_T	GO:0000731	DNA synthesis involved in DNA repair	11/479	40/18870	2.99132e-09	1.88212e-07	1.56219e-07	9768/5111/7398/5983/51514/6240/10459/5422/1032/5425/7486	11
869	Mac_T	GO:1904356	regulation of telomere maintenance via telomere lengthening	13/479	61/18870	3.34229e-09	2.06957e-07	1.71777e-07	10576/3178/6950/140609/7203/22948/10574/908/7520/3181/10575/5588/142	13
870	Mac_T	GO:0050863	regulation of T cell activation	32/479	381/18870	3.47667e-09	2.11914e-07	1.75892e-07	6659/51176/3329/10808/9760/100/6932/3932/916/23240/3146/6935/814/861/6599/11151/1840/6188/7001/399/7535/914/6597/3485/9750/27040/27240/3280/6605/1739/5588/2625	32
871	Mac_T	GO:0070202	regulation of establishment of protein localization to chromosome	7/479	12/18870	4.61302e-09	2.68588e-07	2.22932e-07	10576/6950/7203/22948/10574/908/10575	7
872	Mac_T	GO:1903405	protein localization to nuclear body	7/479	12/18870	4.61302e-09	2.68588e-07	2.22932e-07	10576/6950/7203/22948/10574/908/10575	7
873	Mac_T	GO:1904867	protein localization to Cajal body	7/479	12/18870	4.61302e-09	2.68588e-07	2.22932e-07	10576/6950/7203/22948/10574/908/10575	7
874	Mac_T	GO:0042254	ribosome biogenesis	29/479	325/18870	4.93343e-09	2.8302e-07	2.34911e-07	5591/3921/6193/51602/6194/10528/5901/708/5036/55651/6218/9221/6201/6227/7520/6223/2091/2971/6175/6152/6209/6189/11103/11224/4809/10969/5393/55164/4736	29
875	Mac_T	GO:0006403	RNA localization	22/479	197/18870	6.4312e-09	3.63596e-07	3.01791e-07	10576/3178/6950/10189/636/51602/5901/6428/55651/7203/22948/10574/908/10856/23279/3181/2091/10575/23225/4116/10643/55164	22
876	Mac_T	GO:1903131	mononuclear cell differentiation	36/479	481/18870	7.78316e-09	4.33744e-07	3.60015e-07	915/1021/6659/51176/917/9760/100/6932/3932/9759/916/23240/9452/3146/6935/64919/814/387357/2146/861/6599/4602/1840/5591/3676/9678/6194/7001/8503/399/7535/914/6597/7163/6605/2625	36
877	Mac_T	GO:0042274	ribosomal small subunit biogenesis	16/479	104/18870	7.89761e-09	4.33924e-07	3.60164e-07	5591/3921/6193/51602/6194/10528/6218/6201/6227/7520/6223/2091/6209/6189/11103/4809	16
878	Mac_T	GO:0048872	homeostasis of number of cells	28/479	316/18870	1.06342e-08	5.76169e-07	4.78229e-07	1021/6659/3304/3148/100/4282/3146/132299/2113/2146/4602/11151/5591/5925/6194/7001/54892/2131/6218/3276/84636/9636/6223/27040/27240/83700/94081/2625	28
879	Mac_T	GO:0034728	nucleosome organization	18/479	138/18870	1.36004e-08	7.26785e-07	6.03244e-07	3148/8364/4678/64754/6599/3009/3007/6418/6749/23234/6597/11198/5928/3014/4676/10036/3159/6605	18
880	Mac_T	GO:0051972	regulation of telomerase activity	11/479	46/18870	1.50441e-08	7.9307e-07	6.58261e-07	3320/3326/10576/6950/3184/140609/7520/3181/10575/10728/5588	11
881	Mac_T	GO:0070199	establishment of protein localization to chromosome	9/479	28/18870	1.82601e-08	9.49769e-07	7.88324e-07	10576/6950/3009/7203/22948/10574/908/10856/10575	9
882	Mac_T	GO:1990173	protein localization to nucleoplasm	7/479	14/18870	1.91255e-08	9.8169e-07	8.14819e-07	10576/6950/7203/22948/10574/908/10575	7
883	Mac_T	GO:0040029	epigenetic regulation of gene expression	23/479	229/18870	2.21589e-08	1.12262e-06	9.31793e-07	9759/3146/3070/2146/5925/55617/4001/3065/284058/6597/80063/1111/165918/29128/22955/1786/10664/23028/23347/201161/11335/51742/672	23
884	Mac_T	GO:0006268	DNA unwinding involved in DNA replication	8/479	21/18870	2.47533e-08	1.23798e-06	1.02754e-06	4176/4172/4173/641/51659/3159/4175/7486	8
885	Mac_T	GO:0050852	T cell receptor signaling pathway	18/479	144/18870	2.67468e-08	1.32075e-06	1.09624e-06	28639/915/917/100/3932/916/387357/28638/919/54923/6188/7535/8631/4068/27040/28755/10666/2625	18
886	Mac_T	GO:0045739	positive regulation of DNA repair	17/479	130/18870	3.31046e-08	1.61426e-06	1.33986e-06	3146/6599/5111/5591/6188/7398/6597/165918/10856/2521/605/10459/3014/23347/6605/142/672	17
887	Mac_T	GO:0006271	DNA strand elongation involved in DNA replication	7/479	15/18870	3.50768e-08	1.67433e-06	1.38972e-06	5111/4176/4172/5983/4173/5422/5425	7
888	Mac_T	GO:0045787	positive regulation of cell cycle	28/479	334/18870	3.51947e-08	1.67433e-06	1.38972e-06	5578/5902/2146/6241/10051/10592/5925/51203/79915/896/23310/51514/1111/54892/5885/23236/6733/6240/9928/201161/3280/64151/23137/79848/113130/990/9585/56852	28
889	Mac_T	GO:0033077	T cell differentiation in thymus	14/479	87/18870	3.79529e-08	1.78379e-06	1.48057e-06	915/1021/917/9760/100/916/23240/6935/64919/814/5591/6194/7535/2625	14
890	Mac_T	GO:1905818	regulation of chromosome separation	13/479	74/18870	3.94466e-08	1.83192e-06	1.52052e-06	1063/10051/10592/5925/57082/23310/54892/5885/10459/55755/64151/701/9184	13
891	Mac_T	GO:1901988	negative regulation of cell cycle phase transition	25/479	277/18870	4.59757e-08	2.11001e-06	1.75135e-06	1063/63967/2146/5591/5925/83990/79621/57082/51514/1111/5885/10459/11073/55755/5932/641/3014/79968/1032/1739/701/1407/9184/990/672	25
892	Mac_T	GO:0070198	protein localization to chromosome, telomeric region	9/479	31/18870	4.98052e-08	2.25919e-06	1.87516e-06	10576/6950/7203/22948/10574/908/7520/10575/26354	9
893	Mac_T	GO:0065004	protein-DNA complex assembly	23/479	240/18870	5.31667e-08	2.38395e-06	1.97871e-06	3148/8364/4678/1063/3146/64754/3009/5925/3007/6418/401541/6749/51053/23234/6597/11198/5928/3014/64105/4676/201161/10036/1062	23
894	Mac_T	GO:0030071	regulation of mitotic metaphase/anaphase transition	14/479	90/18870	5.91655e-08	2.62278e-06	2.17695e-06	1063/6599/5925/57082/6597/5885/605/10459/55755/6605/701/1062/9184/990	14
895	Mac_T	GO:0031507	heterochromatin formation	14/479	91/18870	6.83217e-08	2.99464e-06	2.4856e-06	3146/3070/2146/5925/4001/3065/80063/29128/22955/1786/23028/23347/201161/11335	14
896	Mac_T	GO:0032210	regulation of telomere maintenance via telomerase	11/479	53/18870	7.32246e-08	3.17388e-06	2.63437e-06	10576/3178/6950/140609/7203/22948/10574/908/7520/10575/5588	11
897	Mac_T	GO:1903241	U2-type prespliceosome assembly	8/479	24/18870	8.36587e-08	3.58629e-06	2.97668e-06	6636/6635/6628/6632/6633/6634/27336/6637	8
898	Mac_T	GO:0032508	DNA duplex unwinding	13/479	79/18870	8.86306e-08	3.75813e-06	3.11931e-06	7153/4176/83990/4172/5983/4173/7520/10856/641/51659/3159/4175/7486	13
899	Mac_T	GO:1902099	regulation of metaphase/anaphase transition of cell cycle	14/479	93/18870	9.05712e-08	3.79912e-06	3.15333e-06	1063/6599/5925/57082/6597/5885/605/10459/55755/6605/701/1062/9184/990	14
900	Mac_T	GO:0000075	cell cycle checkpoint signaling	20/479	192/18870	1.01095e-07	4.15211e-06	3.44632e-06	1063/63967/5591/83990/79621/57082/51514/1111/10459/11073/55755/5932/641/3014/79968/701/1407/9184/990/672	20
901	Mac_T	GO:0051251	positive regulation of lymphocyte activation	27/479	330/18870	1.01984e-07	4.15211e-06	3.44632e-06	6659/51176/3329/10808/9760/100/4282/3932/916/3146/861/6599/11151/5591/79915/7468/6188/399/7535/10451/6597/3485/10459/3280/6605/5588/2625	27
902	Mac_T	GO:1903706	regulation of hemopoiesis	31/479	417/18870	1.0218e-07	4.15211e-06	3.44632e-06	1021/6659/3304/5578/51176/3148/9760/100/6932/8364/23240/3146/6935/814/2113/861/6599/4602/1840/5591/5925/7001/399/7535/914/6597/3276/9636/6605/2625/841	31
903	Mac_T	GO:0007091	metaphase/anaphase transition of mitotic cell cycle	14/479	94/18870	1.03985e-07	4.18191e-06	3.47105e-06	1063/6599/5925/57082/6597/5885/605/10459/55755/6605/701/1062/9184/990	14
904	Mac_T	GO:0050867	positive regulation of cell activation	30/479	396/18870	1.0928e-07	4.35001e-06	3.61058e-06	6659/51176/3329/10808/9760/100/4282/3932/916/3146/861/6599/4602/11151/5591/79915/7468/6188/399/7535/914/10451/6597/3485/10459/3280/6605/10666/5588/2625	30
905	Mac_T	GO:0007159	leukocyte cell-cell adhesion	31/479	419/18870	1.13714e-07	4.48078e-06	3.71913e-06	6659/51176/3329/10808/100/3932/916/23240/3146/2113/861/6599/11151/1840/3676/6188/7001/6402/399/7535/10507/8631/6597/3485/2131/9750/3280/6605/1739/5588/2625	31
906	Mac_T	GO:0000245	spliceosomal complex assembly	14/479	95/18870	1.19166e-07	4.63121e-06	3.84398e-06	6636/6635/6628/6632/6633/11168/6733/6732/58155/6634/27336/51747/6637/10772	14
907	Mac_T	GO:0051304	chromosome separation	13/479	81/18870	1.20372e-07	4.63121e-06	3.84398e-06	1063/10051/10592/5925/57082/23310/54892/5885/10459/55755/64151/701/9184	13
908	Mac_T	GO:0051973	positive regulation of telomerase activity	9/479	34/18870	1.21093e-07	4.63121e-06	3.84398e-06	3320/3326/10576/6950/140609/7520/10575/10728/5588	9
909	Mac_T	GO:0002696	positive regulation of leukocyte activation	29/479	380/18870	1.5289e-07	5.79054e-06	4.80624e-06	6659/51176/3329/10808/9760/100/4282/3932/916/3146/861/6599/11151/5591/79915/7468/6188/399/7535/914/10451/6597/3485/10459/3280/6605/10666/5588/2625	29
910	Mac_T	GO:0044784	metaphase/anaphase transition of cell cycle	14/479	97/18870	1.55665e-07	5.83895e-06	4.84642e-06	1063/6599/5925/57082/6597/5885/605/10459/55755/6605/701/1062/9184/990	14
911	Mac_T	GO:0070200	establishment of protein localization to telomere	7/479	18/18870	1.62355e-07	6.03187e-06	5.00655e-06	10576/6950/7203/22948/10574/908/10575	7
912	Mac_T	GO:0043484	regulation of RNA splicing	19/479	181/18870	1.86834e-07	6.81157e-06	5.65372e-06	3178/708/6428/4691/2334/6733/6732/5935/3187/3181/2521/58155/284695/27316/5936/10772/4116/6434/3312	19
913	Mac_T	GO:0045580	regulation of T cell differentiation	19/479	181/18870	1.86834e-07	6.81157e-06	5.65372e-06	6659/51176/9760/100/6932/23240/3146/6935/814/861/6599/1840/7001/399/7535/914/6597/6605/2625	19
914	Mac_T	GO:0010948	negative regulation of cell cycle process	26/479	320/18870	2.01979e-07	7.29557e-06	6.05545e-06	1063/63967/2146/5591/5925/83990/79621/57082/51514/9031/1111/5885/10459/11073/55755/5932/641/3014/79968/1032/1739/701/1407/9184/990/672	26
915	Mac_T	GO:0070828	heterochromatin organization	14/479	100/18870	2.29454e-07	8.21194e-06	6.81605e-06	3146/3070/2146/5925/4001/3065/80063/29128/22955/1786/23028/23347/201161/11335	14
916	Mac_T	GO:0051984	positive regulation of chromosome segregation	8/479	27/18870	2.36152e-07	8.3748e-06	6.95123e-06	10051/10592/23310/54892/64151/23137/990/56852	8
917	Mac_T	GO:1902749	regulation of cell cycle G2/M phase transition	15/479	116/18870	2.47354e-07	8.6807e-06	7.20513e-06	1021/1063/63967/79915/79621/51514/1111/5885/6240/11073/5932/641/9928/990/672	15
918	Mac_T	GO:0006337	nucleosome disassembly	7/479	19/18870	2.51453e-07	8.6807e-06	7.20513e-06	6599/6418/6749/6597/11198/3159/6605	7
919	Mac_T	GO:0007076	mitotic chromosome condensation	7/479	19/18870	2.51453e-07	8.6807e-06	7.20513e-06	10051/10592/51203/23310/9031/64151/113130	7
920	Mac_T	GO:0090068	positive regulation of cell cycle process	23/479	262/18870	2.62156e-07	8.97078e-06	7.4459e-06	5902/2146/6241/10051/10592/5925/51203/79915/23310/51514/54892/5885/23236/6240/9928/201161/64151/23137/79848/113130/990/9585/56852	23
921	Mac_T	GO:0022616	DNA strand elongation	9/479	37/18870	2.68407e-07	9.10483e-06	7.55716e-06	5111/4176/4172/5983/4173/10856/5422/64710/5425	9
922	Mac_T	GO:0050851	antigen receptor-mediated signaling pathway	20/479	205/18870	2.95713e-07	9.94462e-06	8.2542e-06	28639/915/917/100/3932/916/387357/28638/919/54923/6188/5583/7535/10451/8631/4068/27040/28755/10666/2625	20
923	Mac_T	GO:0016072	rRNA metabolic process	23/479	264/18870	3.00279e-07	1.00119e-05	8.31002e-06	5591/51602/6194/10528/5036/55651/6597/4691/6218/9221/6201/6227/6223/2091/2971/6209/11103/11224/4809/10969/5393/55164/4736	23
924	Mac_T	GO:0010389	regulation of G2/M transition of mitotic cell cycle	14/479	104/18870	3.76402e-07	1.2339e-05	1.02416e-05	1021/1063/63967/79621/51514/1111/5885/6240/11073/5932/641/9928/990/672	14
925	Mac_T	GO:0033045	regulation of sister chromatid segregation	14/479	104/18870	3.76402e-07	1.2339e-05	1.02416e-05	1063/6599/5925/57082/6597/5885/605/10459/55755/6605/701/1062/9184/990	14
926	Mac_T	GO:0060623	regulation of chromosome condensation	6/479	13/18870	3.82494e-07	1.24343e-05	1.03206e-05	10051/10592/23310/9031/54892/64151	6
927	Mac_T	GO:0045619	regulation of lymphocyte differentiation	20/479	212/18870	5.07676e-07	1.63673e-05	1.35851e-05	6659/51176/9760/100/6932/23240/3146/6935/814/861/6599/1840/5591/7001/399/7535/914/6597/6605/2625	20
928	Mac_T	GO:0048024	regulation of mRNA splicing, via spliceosome	14/479	107/18870	5.37127e-07	1.71749e-05	1.42554e-05	3178/708/6428/4691/6733/6732/5935/3181/27316/5936/10772/4116/6434/3312	14
929	Mac_T	GO:0033260	nuclear DNA replication	9/479	40/18870	5.51364e-07	1.74678e-05	1.44985e-05	5111/79915/4172/51053/4173/5422/641/4175/7486	9
930	Mac_T	GO:0032986	protein-DNA complex disassembly	7/479	21/18870	5.55243e-07	1.74678e-05	1.44985e-05	6599/6418/6749/6597/11198/3159/6605	7
931	Mac_T	GO:1903037	regulation of leukocyte cell-cell adhesion	28/479	382/18870	5.68752e-07	1.77496e-05	1.47325e-05	6659/51176/3329/10808/100/3932/916/23240/3146/2113/861/6599/11151/1840/3676/6188/7001/399/7535/8631/6597/3485/9750/3280/6605/1739/5588/2625	28
932	Mac_T	GO:0006275	regulation of DNA replication	15/479	124/18870	5.95363e-07	1.84326e-05	1.52994e-05	5111/4176/11124/79915/4172/51053/5983/3399/7270/4173/10856/64710/641/4175/990	15
933	Mac_T	GO:1903039	positive regulation of leukocyte cell-cell adhesion	23/479	275/18870	6.17913e-07	1.89802e-05	1.57538e-05	6659/51176/3329/10808/100/3932/916/3146/2113/861/6599/11151/3676/6188/399/7535/8631/6597/3485/3280/6605/5588/2625	23
934	Mac_T	GO:0006282	regulation of DNA repair	20/479	215/18870	6.35267e-07	1.93388e-05	1.60515e-05	3146/6599/5111/5591/7468/6188/7398/6597/1111/165918/10856/2521/605/10459/23028/3014/23347/6605/142/672	20
935	Mac_T	GO:0045786	negative regulation of cell cycle	29/479	407/18870	6.39502e-07	1.93388e-05	1.60515e-05	1021/1063/63967/2146/5591/5925/83990/79621/57082/51053/51514/9031/1111/5885/10459/11073/55755/5932/641/3014/79968/1032/1739/701/1407/9184/990/2625/672	29
936	Mac_T	GO:1901991	negative regulation of mitotic cell cycle phase transition	19/479	196/18870	6.45422e-07	1.93676e-05	1.60755e-05	1063/63967/2146/5591/5925/57082/51514/1111/5885/10459/11073/55755/5932/641/1739/701/9184/990/672	19
937	Mac_T	GO:0006458	'de novo' protein folding	9/479	41/18870	6.90688e-07	2.05677e-05	1.70716e-05	3337/3304/3329/10808/3310/3336/10576/10728/3312	9
938	Mac_T	GO:0050821	protein stabilization	20/479	217/18870	7.35931e-07	2.1749e-05	1.8052e-05	6659/3304/3320/3329/3326/2597/10576/6950/3009/5216/9531/7203/22948/10574/6201/908/10856/2776/10575/10728	20
939	Mac_T	GO:0046631	alpha-beta T cell activation	18/479	181/18870	8.74363e-07	2.56458e-05	2.12864e-05	28639/915/51176/917/10808/9760/100/916/3146/64919/861/28638/4602/919/7535/28755/5588/2625	18
940	Mac_T	GO:0006364	rRNA processing	20/479	225/18870	1.30148e-06	3.74689e-05	3.10998e-05	5591/51602/6194/10528/5036/55651/6218/9221/6201/6227/6223/2091/6209/11103/11224/4809/10969/5393/55164/4736	20
941	Mac_T	GO:0022407	regulation of cell-cell adhesion	32/479	493/18870	1.30498e-06	3.74689e-05	3.10998e-05	6659/5578/51176/3329/10808/100/3932/916/23240/3146/2113/861/6599/11151/1840/3676/6188/7001/399/7535/8631/6597/3485/9750/10459/340533/3280/6605/1739/9223/5588/2625	32
942	Mac_T	GO:0044786	cell cycle DNA replication	9/479	44/18870	1.30627e-06	3.74689e-05	3.10998e-05	5111/79915/4172/51053/4173/5422/641/4175/7486	9
943	Mac_T	GO:0006301	postreplication repair	8/479	34/18870	1.65191e-06	4.70373e-05	3.90417e-05	9768/5111/7398/51514/10459/5425/56852/672	8
944	Mac_T	GO:0006334	nucleosome assembly	14/479	118/18870	1.78678e-06	5.05088e-05	4.19231e-05	3148/8364/4678/64754/3009/3007/6418/6749/23234/11198/5928/3014/4676/10036	14
945	Mac_T	GO:0002262	myeloid cell homeostasis	17/479	173/18870	2.0731e-06	5.81811e-05	4.82913e-05	1021/3304/3148/3146/2113/4602/5591/5925/6194/54892/6218/3276/9636/6223/83700/94081/2625	17
946	Mac_T	GO:1903311	regulation of mRNA metabolic process	26/479	362/18870	2.10659e-06	5.86985e-05	4.87208e-05	5578/3178/57690/708/3184/23589/3182/6428/4691/6733/6732/5935/10236/3181/2521/27316/56829/5936/8148/10772/4116/10643/6434/5393/23318/3312	26
947	Mac_T	GO:0044839	cell cycle G2/M phase transition	16/479	155/18870	2.16303e-06	5.98437e-05	4.96713e-05	1021/1063/63967/79915/79621/51514/1111/5885/23236/6240/11073/5932/641/9928/990/672	16
948	Mac_T	GO:1902105	regulation of leukocyte differentiation	24/479	321/18870	2.60174e-06	7.14745e-05	5.9325e-05	1021/6659/5578/51176/9760/100/6932/23240/3146/6935/814/861/6599/1840/5591/5925/7001/399/7535/914/6597/6605/2625/841	24
949	Mac_T	GO:0022409	positive regulation of cell-cell adhesion	24/479	322/18870	2.74613e-06	7.49138e-05	6.21797e-05	6659/51176/3329/10808/100/3932/916/3146/2113/861/6599/11151/3676/6188/399/7535/8631/6597/3485/3280/6605/9223/5588/2625	24
950	Mac_T	GO:0000086	G2/M transition of mitotic cell cycle	15/479	140/18870	2.81655e-06	7.57748e-05	6.28943e-05	1021/1063/63967/79621/51514/1111/5885/23236/6240/11073/5932/641/9928/990/672	15
951	Mac_T	GO:0034101	erythrocyte homeostasis	15/479	140/18870	2.81655e-06	7.57748e-05	6.28943e-05	1021/3304/3148/2113/4602/5591/5925/6194/54892/6218/3276/9636/6223/94081/2625	15
952	Mac_T	GO:0051084	'de novo' post-translational protein folding	8/479	37/18870	3.28545e-06	8.77845e-05	7.28626e-05	3337/3304/10808/3310/3336/10576/10728/3312	8
953	Mac_T	GO:0007093	mitotic cell cycle checkpoint signaling	15/479	142/18870	3.36459e-06	8.91568e-05	7.40016e-05	1063/63967/5591/57082/51514/1111/10459/11073/55755/5932/641/701/9184/990/672	15
954	Mac_T	GO:0031297	replication fork processing	9/479	49/18870	3.38252e-06	8.91568e-05	7.40016e-05	253714/5111/10189/64710/5932/641/7486/142/672	9
955	Mac_T	GO:0050684	regulation of mRNA processing	14/479	129/18870	5.18172e-06	0.000135664	0.000112603	3178/708/6428/4691/6733/6732/5935/3181/27316/5936/10772/4116/6434/3312	14
956	Mac_T	GO:0000028	ribosomal small subunit assembly	6/479	19/18870	5.31134e-06	0.00013813	0.00011465	5591/3921/6193/7520/6223/6209	6
957	Mac_T	GO:0000387	spliceosomal snRNP assembly	9/479	52/18870	5.66209e-06	0.000146277	0.000121412	6636/6635/6628/6632/6633/6634/6637/10772/57819	9
958	Mac_T	GO:0030218	erythrocyte differentiation	14/479	131/18870	6.20864e-06	0.000159341	0.000132256	1021/3304/3148/2113/4602/5591/5925/6194/54892/3276/9636/6223/94081/2625	14
959	Mac_T	GO:0042770	signal transduction in response to DNA damage	17/479	189/18870	6.90026e-06	0.00017551	0.000145676	6659/4282/63967/5591/83990/79915/79621/51514/1111/10459/11073/641/23028/3014/79968/1407/672	17
960	Mac_T	GO:0050870	positive regulation of T cell activation	20/479	251/18870	6.92861e-06	0.00017551	0.000145676	6659/51176/3329/10808/100/3932/916/3146/861/6599/11151/6188/399/7535/6597/3485/3280/6605/5588/2625	20
961	Mac_T	GO:0000727	double-strand break repair via break-induced replication	5/479	12/18870	7.0544e-06	0.000177543	0.000147364	4176/4172/4173/51659/4175	5
962	Mac_T	GO:0000082	G1/S transition of mitotic cell cycle	20/479	252/18870	7.3522e-06	0.000183852	0.0001526	1021/2146/6599/6241/5591/5925/6194/896/6597/23236/5721/6240/605/5932/1032/9928/5720/6605/1739/990	20
963	Mac_T	GO:0034508	centromere complex assembly	7/479	30/18870	7.97425e-06	0.000198137	0.000164457	4678/1063/5925/401541/64105/201161/1062	7
964	Mac_T	GO:0044843	cell cycle G1/S phase transition	21/479	279/18870	9.89227e-06	0.000244239	0.000202722	1021/2146/6599/6241/5591/5925/6194/896/6597/23236/5721/6240/605/5932/1032/9928/493/5720/6605/1739/990	21
965	Mac_T	GO:0031647	regulation of protein stability	23/479	325/18870	1.03659e-05	0.000254323	0.000211092	6659/3304/3320/3329/3326/2597/10576/6950/3009/5591/5216/9531/440193/7203/22948/10574/6201/908/10856/2776/10575/10728/3312	23
966	Mac_T	GO:0045005	DNA-templated DNA replication maintenance of fidelity	9/479	56/18870	1.06569e-05	0.000259829	0.000215663	253714/5111/10189/64710/5932/641/7486/142/672	9
967	Mac_T	GO:0051085	chaperone cofactor-dependent protein refolding	7/479	32/18870	1.26174e-05	0.000305717	0.00025375	3337/3304/10808/3310/3336/10728/3312	7
968	Mac_T	GO:1901873	regulation of post-translational protein modification	21/479	284/18870	1.29598e-05	0.000312074	0.000259027	6659/3304/3320/9759/27338/3326/55215/6418/6188/284058/55859/9031/3301/6201/6187/9636/10459/23028/26354/1407/672	21
969	Mac_T	GO:0002562	somatic diversification of immune receptors via germline recombination within a single locus	10/479	72/18870	1.32508e-05	0.000315191	0.000261614	51176/3329/3148/3146/64919/5591/79915/7468/165918/10459	10
970	Mac_T	GO:0016444	somatic cell DNA recombination	10/479	72/18870	1.32508e-05	0.000315191	0.000261614	51176/3329/3148/3146/64919/5591/79915/7468/165918/10459	10
971	Mac_T	GO:0071168	protein localization to chromatin	9/479	59/18870	1.65242e-05	0.000390673	0.000324265	51176/8364/2146/253714/3009/5885/7443/10856/142	9
972	Mac_T	GO:0045059	positive thymic T cell selection	5/479	14/18870	1.70962e-05	0.00040176	0.000333468	915/917/9760/916/7535	5
973	Mac_T	GO:0045785	positive regulation of cell adhesion	29/479	482/18870	1.74379e-05	0.000407336	0.000338095	1021/6659/5578/51176/3329/10808/100/3932/916/3146/2113/861/6599/11151/3676/9448/6188/708/399/7535/10451/8631/6597/3485/3280/6605/9223/5588/2625	29
974	Mac_T	GO:0045061	thymic T cell selection	6/479	23/18870	1.81262e-05	0.000420895	0.00034935	915/917/9760/916/7535/2625	6
975	Mac_T	GO:2000045	regulation of G1/S transition of mitotic cell cycle	16/479	183/18870	1.82689e-05	0.000421699	0.000350017	2146/6599/6241/5591/5925/6597/23236/5721/6240/605/1032/9928/5720/6605/1739/990	16
976	Mac_T	GO:0045930	negative regulation of mitotic cell cycle	19/479	248/18870	2.03664e-05	0.000467349	0.000387908	1063/63967/2146/5591/5925/57082/51514/1111/5885/10459/11073/55755/5932/641/1739/701/9184/990/672	19
977	Mac_T	GO:1902107	positive regulation of leukocyte differentiation	16/479	185/18870	2.09112e-05	0.000474272	0.000393653	6659/5578/51176/9760/100/3146/861/6599/5591/5925/399/7535/6597/6605/2625/841	16
978	Mac_T	GO:1903708	positive regulation of hemopoiesis	16/479	185/18870	2.09112e-05	0.000474272	0.000393653	6659/5578/51176/9760/100/3146/861/6599/5591/5925/399/7535/6597/6605/2625/841	16
979	Mac_T	GO:0090329	regulation of DNA-templated DNA replication	8/479	47/18870	2.14209e-05	0.000483023	0.000400917	5111/4176/4172/51053/5983/4173/641/4175	8
980	Mac_T	GO:0051053	negative regulation of DNA metabolic process	14/479	146/18870	2.16312e-05	0.000484962	0.000402526	3178/3009/3007/6188/51053/7270/1111/7520/10459/641/23347/990/2625/142	14
981	Mac_T	GO:1900182	positive regulation of protein localization to nucleus	11/479	93/18870	2.35062e-05	0.000523987	0.000434918	3320/10576/6950/5901/9531/7203/22948/10574/908/10575/142	11
982	Mac_T	GO:0030174	regulation of DNA-templated DNA replication initiation	5/479	15/18870	2.51101e-05	0.00055656	0.000461954	4176/4172/51053/4173/4175	5
983	Mac_T	GO:1902806	regulation of cell cycle G1/S phase transition	17/479	209/18870	2.57867e-05	0.000568327	0.000471721	2146/6599/6241/5591/5925/6597/23236/5721/6240/605/1032/9928/493/5720/6605/1739/990	17
984	Mac_T	GO:2001251	negative regulation of chromosome organization	11/479	94/18870	2.60228e-05	0.000570308	0.000473365	1063/7153/3178/57082/9031/5885/10459/55755/701/9184/142	11
985	Mac_T	GO:0002200	somatic diversification of immune receptors	10/479	78/18870	2.71495e-05	0.000591676	0.000491101	51176/3329/3148/3146/64919/5591/79915/7468/165918/10459	10
986	Mac_T	GO:0043414	macromolecule methylation	17/479	210/18870	2.74142e-05	0.000594127	0.000493135	6636/6635/3070/2146/64754/6628/6632/6633/284058/3276/2091/6634/1786/10664/6637/51742/142	17
987	Mac_T	GO:0010720	positive regulation of cell development	27/479	444/18870	2.82032e-05	0.000607849	0.000504525	6659/1002/5578/51176/9760/100/3146/861/6599/4602/5591/5925/5583/23499/3065/399/7535/10507/259266/6597/7520/23028/1627/3280/6605/2625/841	27
988	Mac_T	GO:1902459	positive regulation of stem cell population maintenance	8/479	49/18870	2.93857e-05	0.000629855	0.00052279	6599/3065/6597/5928/605/58516/6605/51742	8
989	Mac_T	GO:0019985	translesion synthesis	6/479	25/18870	3.04582e-05	0.000645747	0.000535981	9768/5111/7398/51514/10459/5425	6
990	Mac_T	GO:0046629	gamma-delta T cell activation	6/479	25/18870	3.04582e-05	0.000645747	0.000535981	6659/51176/917/6932/916/919	6
991	Mac_T	GO:0042113	B cell activation	20/479	278/18870	3.07613e-05	0.000648648	0.000538388	51176/3329/100/4282/9759/9452/2146/5591/3676/9678/79915/7468/8503/7535/51237/10451/7163/165918/10459/841	20
992	Mac_T	GO:0042255	ribosome assembly	9/479	64/18870	3.23735e-05	0.000678973	0.000563559	5591/3921/6193/708/7520/6223/6175/6152/6209	9
993	Mac_T	GO:0070661	leukocyte proliferation	23/479	350/18870	3.36529e-05	0.000702032	0.000582698	51176/3329/100/4282/916/23240/3146/3070/11151/79915/6194/6188/7001/2950/896/7535/51237/10451/3485/1265/3280/1739/5588	23
994	Mac_T	GO:0036260	RNA capping	7/479	37/18870	3.45843e-05	0.000713978	0.000592614	6636/6635/6628/6632/6633/6634/6637	7
995	Mac_T	GO:2000779	regulation of double-strand break repair	13/479	133/18870	3.45916e-05	0.000713978	0.000592614	6599/5591/7468/6597/1111/10856/2521/605/10459/23028/23347/6605/142	13
996	Mac_T	GO:1901874	negative regulation of post-translational protein modification	11/479	97/18870	3.50184e-05	0.000718983	0.000596768	6659/3304/6418/6188/55859/3301/6201/9636/10459/1407/672	11
997	Mac_T	GO:0006303	double-strand break repair via nonhomologous end joining	9/479	65/18870	3.67433e-05	0.000750448	0.000622884	3148/3146/5591/7468/165918/7520/10459/5422/23347	9
998	Mac_T	GO:0031570	DNA integrity checkpoint signaling	13/479	135/18870	4.04888e-05	0.00082264	0.000682805	63967/5591/83990/79621/51514/1111/11073/641/3014/79968/1407/990/672	13
999	Mac_T	GO:0046651	lymphocyte proliferation	21/479	307/18870	4.11861e-05	0.00083247	0.000690964	51176/3329/100/4282/916/23240/3146/3070/11151/79915/6194/6188/7001/896/7535/51237/10451/3485/3280/1739/5588	21
1000	Mac_T	GO:0000018	regulation of DNA recombination	13/479	136/18870	4.37529e-05	0.000879794	0.000730243	3009/10189/3007/79915/7468/1111/10856/2521/10459/641/23028/23347/142	13
1001	Mac_T	GO:0007088	regulation of mitotic nuclear division	12/479	118/18870	4.66108e-05	0.000932455	0.000773953	1063/4288/5925/51203/57082/1111/5885/10459/55755/701/9184/9585	12
1002	Mac_T	GO:0010972	negative regulation of G2/M transition of mitotic cell cycle	9/479	67/18870	4.69924e-05	0.000935292	0.000776308	63967/51514/1111/5885/11073/5932/641/990/672	9
1003	Mac_T	GO:0042026	protein refolding	6/479	27/18870	4.87619e-05	0.000965585	0.000801451	3304/3320/3329/3310/3301/3312	6
1004	Mac_T	GO:0033151	V(D)J recombination	5/479	17/18870	4.96109e-05	0.000977434	0.000811287	51176/3148/3146/64919/5591	5
1005	Mac_T	GO:0010212	response to ionizing radiation	13/479	138/18870	5.09746e-05	0.000994456	0.000825415	5591/165918/6240/7520/11073/64710/641/23028/3014/7486/2625/142/672	13
1006	Mac_T	GO:0002520	immune system development	16/479	199/18870	5.09847e-05	0.000994456	0.000825415	51176/3329/3148/9760/100/916/3146/64919/5591/79915/7468/7001/165918/10459/3280/2625	16
1007	Mac_T	GO:1903320	regulation of protein modification by small protein conjugation or removal	18/479	243/18870	5.20931e-05	0.00101102	0.000839164	6659/3304/3320/9759/27338/3326/55215/6188/55859/3301/6201/6187/9636/10459/23028/26354/1407/672	18
1008	Mac_T	GO:0044818	mitotic G2/M transition checkpoint	8/479	53/18870	5.28463e-05	0.00101274	0.000840595	63967/51514/1111/11073/5932/641/990/672	8
1009	Mac_T	GO:0045058	T cell selection	8/479	53/18870	5.28463e-05	0.00101274	0.000840595	915/917/9760/916/64919/387357/7535/2625	8
1010	Mac_T	GO:0035825	homologous recombination	9/479	68/18870	5.29608e-05	0.00101274	0.000840595	7153/83990/5885/29128/11073/64710/5932/84057/672	9
1011	Mac_T	GO:0031396	regulation of protein ubiquitination	16/479	200/18870	5.41504e-05	0.00103044	0.000855284	6659/3304/3320/27338/3326/55215/6188/55859/3301/6201/6187/9636/10459/23028/1407/672	16
1012	Mac_T	GO:0032943	mononuclear cell proliferation	21/479	314/18870	5.70608e-05	0.00108055	0.000896878	51176/3329/100/4282/916/23240/3146/3070/11151/79915/6194/6188/7001/896/7535/51237/10451/3485/3280/1739/5588	21
1013	Mac_T	GO:0043368	positive T cell selection	7/479	40/18870	5.86432e-05	0.00109984	0.000912887	915/917/9760/916/64919/387357/7535	7
1014	Mac_T	GO:0071459	protein localization to chromosome, centromeric region	7/479	40/18870	5.86432e-05	0.00109984	0.000912887	8364/5925/57082/10664/23137/701/9184	7
1015	Mac_T	GO:0045639	positive regulation of myeloid cell differentiation	11/479	103/18870	6.12695e-05	0.0011436	0.000949207	3304/5578/51176/3148/2113/861/5591/5925/3276/9636/841	11
1016	Mac_T	GO:0051347	positive regulation of transferase activity	25/479	414/18870	6.22188e-05	0.00115579	0.000959324	3320/27338/63967/3326/10576/2146/5111/6950/6188/3184/896/22974/140609/5983/5558/6187/7520/3181/27040/10575/10728/9928/493/1062/5588	25
1017	Mac_T	GO:2000781	positive regulation of double-strand break repair	10/479	86/18870	6.37699e-05	0.00117899	0.000978579	6599/5591/6597/10856/2521/605/10459/23347/6605/142	10
1018	Mac_T	GO:1902750	negative regulation of cell cycle G2/M phase transition	9/479	70/18870	6.68295e-05	0.00122973	0.00102069	63967/51514/1111/5885/11073/5932/641/990/672	9
1019	Mac_T	GO:0002429	immune response-activating cell surface receptor signaling pathway	21/479	318/18870	6.84017e-05	0.00125275	0.0010398	28639/915/917/100/3932/916/387357/28638/84937/919/54923/6188/5583/7535/10451/8631/4068/27040/28755/10666/2625	21
1020	Mac_T	GO:1905820	positive regulation of chromosome separation	6/479	29/18870	7.49535e-05	0.00136633	0.00113407	10051/10592/5925/23310/54892/64151	6
1021	Mac_T	GO:0006997	nucleus organization	13/479	144/18870	7.92104e-05	0.00143119	0.00118791	5578/3148/2113/4001/8815/1111/2334/6733/6732/9221/10208/7443/6223	13
1022	Mac_T	GO:0045839	negative regulation of mitotic nuclear division	8/479	56/18870	7.92454e-05	0.00143119	0.00118791	1063/57082/1111/5885/10459/55755/701/9184	8
1023	Mac_T	GO:0002768	immune response-regulating cell surface receptor signaling pathway	22/479	346/18870	8.08097e-05	0.00145271	0.00120578	28639/915/917/100/3932/916/387357/28638/84937/919/54923/6188/5583/7535/10451/8631/4068/27040/28755/10666/5588/2625	22
1024	Mac_T	GO:0002757	immune response-activating signaling pathway	27/479	473/18870	8.29366e-05	0.00148411	0.00123184	28639/915/3304/3329/917/100/3932/916/3146/387357/28638/84937/919/54923/6188/5583/708/140609/7535/10451/8631/4068/27040/28755/10666/2625/3312	27
1025	Mac_T	GO:0002764	immune response-regulating signaling pathway	28/479	500/18870	8.53665e-05	0.00152062	0.00126214	28639/915/3304/3329/917/100/3932/916/3146/387357/28638/84937/919/54923/6188/5583/708/140609/7535/10451/8631/4068/27040/28755/10666/5588/2625/3312	28
1026	Mac_T	GO:0000077	DNA damage checkpoint signaling	12/479	126/18870	8.86167e-05	0.00157134	0.00130423	63967/5591/83990/79621/51514/1111/11073/641/3014/79968/1407/672	12
1027	Mac_T	GO:0098727	maintenance of cell number	15/479	187/18870	8.92849e-05	0.00157602	0.00130812	6659/2146/6599/3065/259266/6597/5928/605/26354/3280/58516/6605/23137/23318/51742	15
1028	Mac_T	GO:0051783	regulation of nuclear division	13/479	146/18870	9.12383e-05	0.00160325	0.00133072	1063/4288/5925/51203/57082/1111/5885/23236/10459/55755/701/9184/9585	13
1029	Mac_T	GO:0032259	methylation	19/479	282/18870	0.000115675	0.00201585	0.00167319	7298/6636/6635/3070/2146/64754/6628/6632/7468/6633/284058/3276/2091/6634/1786/10664/6637/51742/142	19
1030	Mac_T	GO:0010965	regulation of mitotic sister chromatid separation	8/479	59/18870	0.000115753	0.00201585	0.00167319	1063/5925/57082/5885/10459/55755/701/9184	8
1031	Mac_T	GO:0045621	positive regulation of lymphocyte differentiation	12/479	130/18870	0.000119736	0.00207596	0.00172308	6659/51176/9760/100/861/6599/5591/399/7535/6597/6605/2625	12
1032	Mac_T	GO:0019079	viral genome replication	12/479	131/18870	0.00012884	0.00222391	0.00184588	7153/8519/8815/6733/6732/9636/3609/64710/27336/56829/23137/3312	12
1033	Mac_T	GO:0051098	regulation of binding	18/479	262/18870	0.00013629	0.00234214	0.00194401	3925/51176/3148/9759/3146/4830/5925/3676/5901/51053/166/9750/10459/64710/23028/3280/489/2625	18
1034	Mac_T	GO:0045646	regulation of erythrocyte differentiation	7/479	46/18870	0.000147655	0.00252633	0.0020969	1021/3304/3148/2113/5591/3276/9636	7
1035	Mac_T	GO:0051383	kinetochore organization	5/479	21/18870	0.000150004	0.00255531	0.00212095	1063/10051/10592/64105/1062	5
1036	Mac_T	GO:0031397	negative regulation of protein ubiquitination	9/479	78/18870	0.000156696	0.0026577	0.00220594	6659/3304/6188/55859/3301/6201/9636/10459/1407	9
1037	Mac_T	GO:0045648	positive regulation of erythrocyte differentiation	6/479	33/18870	0.000160367	0.00270819	0.00224784	3304/3148/2113/5591/3276/9636	6
1038	Mac_T	GO:0051306	mitotic sister chromatid separation	8/479	62/18870	0.000165156	0.00277704	0.00230499	1063/5925/57082/5885/10459/55755/701/9184	8
1039	Mac_T	GO:0051784	negative regulation of nuclear division	8/479	63/18870	0.00018504	0.00309804	0.00257142	1063/57082/1111/5885/10459/55755/701/9184	8
1040	Mac_T	GO:0071353	cellular response to interleukin-4	6/479	34/18870	0.000190595	0.0031774	0.0026373	51176/6932/10376/3326/11151/2625	6
1041	Mac_T	GO:0033046	negative regulation of sister chromatid segregation	7/479	48/18870	0.000194435	0.00318694	0.00264521	1063/57082/5885/10459/55755/701/9184	7
1042	Mac_T	GO:0033048	negative regulation of mitotic sister chromatid segregation	7/479	48/18870	0.000194435	0.00318694	0.00264521	1063/57082/5885/10459/55755/701/9184	7
1043	Mac_T	GO:0045841	negative regulation of mitotic metaphase/anaphase transition	7/479	48/18870	0.000194435	0.00318694	0.00264521	1063/57082/5885/10459/55755/701/9184	7
1044	Mac_T	GO:2000816	negative regulation of mitotic sister chromatid separation	7/479	48/18870	0.000194435	0.00318694	0.00264521	1063/57082/5885/10459/55755/701/9184	7
1045	Mac_T	GO:0051131	chaperone-mediated protein complex assembly	5/479	23/18870	0.000237866	0.00388249	0.00322253	3320/3329/3326/10576/10728	5
1046	Mac_T	GO:0140719	constitutive heterochromatin formation	4/479	13/18870	0.00024433	0.00397139	0.00329632	3070/2146/23347/201161	4
1047	Mac_T	GO:0019827	stem cell population maintenance	14/479	183/18870	0.00024941	0.00403696	0.00335074	6659/6599/3065/259266/6597/5928/605/26354/3280/58516/6605/23137/23318/51742	14
1048	Mac_T	GO:0051985	negative regulation of chromosome segregation	7/479	50/18870	0.000252504	0.00403696	0.00335074	1063/57082/5885/10459/55755/701/9184	7
1049	Mac_T	GO:1902100	negative regulation of metaphase/anaphase transition of cell cycle	7/479	50/18870	0.000252504	0.00403696	0.00335074	1063/57082/5885/10459/55755/701/9184	7
1050	Mac_T	GO:1905819	negative regulation of chromosome separation	7/479	50/18870	0.000252504	0.00403696	0.00335074	1063/57082/5885/10459/55755/701/9184	7
1051	Mac_T	GO:0070670	response to interleukin-4	6/479	36/18870	0.000264442	0.0042039	0.00348931	51176/6932/10376/3326/11151/2625	6
1052	Mac_T	GO:0009314	response to radiation	24/479	428/18870	0.000265101	0.0042039	0.00348931	9768/5111/5591/7398/51514/2131/3150/165918/6240/7520/10856/2776/11073/64710/641/23028/3014/1032/5936/7486/1407/2625/142/672	24
1053	Mac_T	GO:0051101	regulation of DNA binding	9/479	85/18870	0.000302597	0.0047774	0.00396532	51176/3148/3146/4830/5925/10459/23028/3280/2625	9
1054	Mac_T	GO:0016032	viral process	24/479	432/18870	0.000303716	0.0047774	0.00396532	3304/51176/3146/7153/3326/8519/3921/10572/636/5901/8815/3065/6597/6733/6732/3276/9636/3609/64710/27336/56829/2530/23137/3312	24
1055	Mac_T	GO:0007095	mitotic G2 DNA damage checkpoint signaling	6/479	37/18870	0.000308931	0.00483992	0.00401721	63967/51514/1111/11073/641/672	6
1056	Mac_T	GO:0140694	non-membrane-bounded organelle assembly	23/479	408/18870	0.000328446	0.00512507	0.00425389	3304/203068/1063/5591/3921/6193/636/6188/708/22974/140609/259266/1731/7520/6223/55755/22995/6175/6152/6209/64105/1062/672	23
1057	Mac_T	GO:0050671	positive regulation of lymphocyte proliferation	12/479	145/18870	0.000333553	0.00518403	0.00430283	100/4282/916/3146/11151/79915/6188/7535/10451/3485/3280/5588	12
1058	Mac_T	GO:0018209	peptidyl-serine modification	19/479	308/18870	0.000356321	0.00551483	0.0045774	5578/3320/4282/814/63967/3326/64754/2590/5591/5583/140609/6733/6732/27347/7443/10459/7150/493/5588	19
1059	Mac_T	GO:0007339	binding of sperm to zona pellucida	6/479	38/18870	0.000359079	0.00551483	0.0045774	10576/6950/7203/22948/10574/10575	6
1060	Mac_T	GO:0070316	regulation of G0 to G1 transition	6/479	38/18870	0.000359079	0.00551483	0.0045774	6599/6597/1111/6240/605/6605	6
1061	Mac_T	GO:0045637	regulation of myeloid cell differentiation	15/479	213/18870	0.000371612	0.00568493	0.00471859	1021/3304/5578/51176/3148/8364/814/2113/861/4602/5591/5925/3276/9636/841	15
1062	Mac_T	GO:0034470	ncRNA processing	24/479	439/18870	0.000383327	0.00584125	0.00484833	5591/51602/6194/10528/5036/6428/55651/6218/9221/6201/6227/3181/6223/2091/54901/6209/11103/11224/4809/10969/5393/55164/23318/4736	24
1063	Mac_T	GO:0071479	cellular response to ionizing radiation	8/479	70/18870	0.000386421	0.00586548	0.00486844	7520/64710/641/23028/3014/7486/2625/672	8
1064	Mac_T	GO:0032946	positive regulation of mononuclear cell proliferation	12/479	148/18870	0.000402252	0.00608212	0.00504826	100/4282/916/3146/11151/79915/6188/7535/10451/3485/3280/5588	12
1065	Mac_T	GO:0033047	regulation of mitotic sister chromatid segregation	7/479	54/18870	0.000410321	0.00618017	0.00512964	1063/57082/5885/10459/55755/701/9184	7
1066	Mac_T	GO:0000380	alternative mRNA splicing, via spliceosome	8/479	71/18870	0.000425987	0.00639145	0.00530501	3178/6421/23028/4670/27316/5936/4116/6434	8
1067	Mac_T	GO:0009263	deoxyribonucleotide biosynthetic process	4/479	15/18870	0.000447993	0.00664494	0.00551541	7298/1854/6241/6240	4
1068	Mac_T	GO:0009265	2'-deoxyribonucleotide biosynthetic process	4/479	15/18870	0.000447993	0.00664494	0.00551541	7298/1854/6241/6240	4
1069	Mac_T	GO:0046385	deoxyribose phosphate biosynthetic process	4/479	15/18870	0.000447993	0.00664494	0.00551541	7298/1854/6241/6240	4
1070	Mac_T	GO:0001776	leukocyte homeostasis	10/479	109/18870	0.000457513	0.00676045	0.00561129	100/4282/3146/11151/6194/7001/84636/27040/27240/83700	10
1071	Mac_T	GO:0045071	negative regulation of viral genome replication	7/479	55/18870	0.000460032	0.00677202	0.00562089	8519/8815/6733/6732/9636/3609/56829	7
1072	Mac_T	GO:1903321	negative regulation of protein modification by small protein conjugation or removal	9/479	90/18870	0.000464311	0.00680931	0.00565184	6659/3304/6188/55859/3301/6201/9636/10459/1407	9
1073	Mac_T	GO:0043254	regulation of protein-containing complex assembly	23/479	419/18870	0.000476499	0.00696188	0.00577847	3304/3925/3320/1854/3146/11151/5925/5216/11124/6711/6188/140609/51466/8631/9636/85464/55755/26999/9928/83700/3280/1739/3312	23
1074	Mac_T	GO:0045023	G0 to G1 transition	6/479	40/18870	0.000478328	0.00696252	0.00577901	6599/6597/1111/6240/605/6605	6
1075	Mac_T	GO:0070663	regulation of leukocyte proliferation	17/479	267/18870	0.00050191	0.00727862	0.00604138	100/4282/916/23240/3146/11151/79915/6188/2950/7535/51237/10451/3485/1265/3280/1739/5588	17
1076	Mac_T	GO:0045132	meiotic chromosome segregation	9/479	91/18870	0.000503923	0.00728075	0.00604314	10051/10592/83990/259266/1731/51759/9232/10388/84057	9
1077	Mac_T	GO:0033081	regulation of T cell differentiation in thymus	5/479	27/18870	0.000524884	0.00750013	0.00622523	9760/100/23240/6935/814	5
1078	Mac_T	GO:0033119	negative regulation of RNA splicing	5/479	27/18870	0.000524884	0.00750013	0.00622523	708/3181/58155/27316/10772	5
1079	Mac_T	GO:0050857	positive regulation of antigen receptor-mediated signaling pathway	5/479	27/18870	0.000524884	0.00750013	0.00622523	100/3932/6188/5583/10666	5
1080	Mac_T	GO:1903829	positive regulation of protein localization	25/479	476/18870	0.000526797	0.00750013	0.00622523	6659/3320/3326/10576/6950/919/636/4628/6711/5901/5583/9531/23236/7203/22948/10574/908/7443/10575/26354/493/1739/57628/9585/142	25
1081	Mac_T	GO:0032781	positive regulation of ATP-dependent activity	6/479	41/18870	0.000548466	0.00772525	0.00641209	3337/486/5216/23234/29128/10598	6
1082	Mac_T	GO:0043388	positive regulation of DNA binding	6/479	41/18870	0.000548466	0.00772525	0.00641209	3148/3146/4830/5925/3280/2625	6
1083	Mac_T	GO:0097193	intrinsic apoptotic signaling pathway	19/479	319/18870	0.00054855	0.00772525	0.00641209	4282/3932/51741/3070/5591/1984/79915/6188/3065/3301/3094/6201/6421/54541/23028/1032/489/142/672	19
1084	Mac_T	GO:2000036	regulation of stem cell population maintenance	8/479	74/18870	0.000564832	0.00792594	0.00657866	6599/3065/6597/5928/605/58516/6605/51742	8
1085	Mac_T	GO:0018105	peptidyl-serine phosphorylation	18/479	295/18870	0.000574497	0.00803266	0.00666724	5578/3320/4282/814/63967/3326/64754/5591/5583/140609/6733/6732/27347/7443/10459/7150/493/5588	18
1086	Mac_T	GO:0030575	nuclear body organization	4/479	16/18870	0.000585402	0.00809807	0.00672153	2113/2334/6733/10208	4
1087	Mac_T	GO:0034349	glial cell apoptotic process	4/479	16/18870	0.000585402	0.00809807	0.00672153	5578/5925/5583/5885	4
1088	Mac_T	GO:1902969	mitotic DNA replication	4/479	16/18870	0.000585402	0.00809807	0.00672153	4172/4173/5422/4175	4
1089	Mac_T	GO:0042273	ribosomal large subunit biogenesis	8/479	76/18870	0.0006762	0.00932104	0.00773662	55651/2971/6175/6152/11224/4809/10969/4736	8
1090	Mac_T	GO:0007062	sister chromatid cohesion	7/479	59/18870	0.000708923	0.00973771	0.00808246	5925/5885/10664/23047/23137/701/113130	7
1091	Mac_T	GO:0045663	positive regulation of myoblast differentiation	6/479	43/18870	0.000712516	0.00975272	0.00809492	6659/6599/6597/23236/9750/6605	6
1092	Mac_T	GO:0021537	telencephalon development	17/479	276/18870	0.000728864	0.00994161	0.0082517	1021/51176/23224/113246/64919/2146/5901/3065/259266/2131/23236/23028/3014/9928/3280/493/6434	17
1093	Mac_T	GO:0002260	lymphocyte homeostasis	8/479	77/18870	0.000738165	0.0100232	0.00831941	100/4282/11151/6194/7001/84636/27040/27240	8
1094	Mac_T	GO:0007623	circadian rhythm	14/479	204/18870	0.000744352	0.0100232	0.00831941	7298/7153/2146/5591/3184/3065/3399/10236/6421/2776/7150/5936/1407/142	14
1095	Mac_T	GO:0051310	metaphase chromosome alignment	9/479	96/18870	0.000745833	0.0100232	0.00831941	1063/5925/57082/10726/1731/9928/1062/113130/9184	9
1096	Mac_T	GO:0045582	positive regulation of T cell differentiation	10/479	116/18870	0.000748144	0.0100232	0.00831941	6659/51176/100/861/6599/399/7535/6597/6605/2625	10
1097	Mac_T	GO:0033631	cell-cell adhesion mediated by integrin	4/479	17/18870	0.000750261	0.0100232	0.00831941	100/916/3676/8631	4
1098	Mac_T	GO:0050862	positive regulation of T cell receptor signaling pathway	4/479	17/18870	0.000750261	0.0100232	0.00831941	100/3932/6188/10666	4
1099	Mac_T	GO:0048545	response to steroid hormone	19/479	330/18870	0.000824667	0.0109796	0.00911326	3304/3148/7298/64754/5111/5901/56937/3065/6597/3485/3301/27347/54541/23028/10728/1407/3312/142/672	19
1100	Mac_T	GO:0071383	cellular response to steroid hormone stimulus	14/479	208/18870	0.000899505	0.0119353	0.00990647	3304/64754/5901/56937/3065/6597/3301/54541/23028/10728/1407/3312/142/672	14
1101	Mac_T	GO:1903312	negative regulation of mRNA metabolic process	9/479	99/18870	0.000931533	0.0123183	0.0102244	708/3184/3182/3181/2521/27316/8148/10772/10643	9
1102	Mac_T	GO:0016570	histone modification	10/479	120/18870	0.000973265	0.0128267	0.0106464	9759/64754/6418/3065/284058/9031/5928/29128/10856/672	10
1103	Mac_T	GO:0007064	mitotic sister chromatid cohesion	5/479	31/18870	0.00101628	0.0132636	0.011009	5925/5885/23047/23137/113130	5
1104	Mac_T	GO:0007094	mitotic spindle assembly checkpoint signaling	6/479	46/18870	0.00102681	0.0132636	0.011009	1063/57082/10459/55755/701/9184	6
1105	Mac_T	GO:0071173	spindle assembly checkpoint signaling	6/479	46/18870	0.00102681	0.0132636	0.011009	1063/57082/10459/55755/701/9184	6
1106	Mac_T	GO:0071174	mitotic spindle checkpoint signaling	6/479	46/18870	0.00102681	0.0132636	0.011009	1063/57082/10459/55755/701/9184	6
1107	Mac_T	GO:0140718	facultative heterochromatin formation	6/479	46/18870	0.00102681	0.0132636	0.011009	3070/2146/3065/80063/1786/23028	6
1108	Mac_T	GO:1901976	regulation of cell cycle checkpoint	6/479	46/18870	0.00102681	0.0132636	0.011009	79621/57082/55755/79968/1407/672	6
1109	Mac_T	GO:0010639	negative regulation of organelle organization	20/479	363/18870	0.00104447	0.0134471	0.0111613	3925/1063/7153/3178/11151/5216/6711/57082/22974/9031/1111/5885/50810/85464/10459/55755/701/9184/142/672	20
1110	Mac_T	GO:1900180	regulation of protein localization to nucleus	11/479	143/18870	0.00107305	0.0137696	0.011429	3320/10576/6950/5901/9531/7203/22948/10574/908/10575/142	11
1111	Mac_T	GO:0051258	protein polymerization	17/479	286/18870	0.00107897	0.0138001	0.0114543	3304/3925/3320/27338/11151/5216/6711/6188/81624/22974/51466/1729/50810/85464/55755/26999/1739	17
1112	Mac_T	GO:0070665	positive regulation of leukocyte proliferation	12/479	166/18870	0.00111518	0.0142167	0.0118001	100/4282/916/3146/11151/79915/6188/7535/10451/3485/3280/5588	12
1113	Mac_T	GO:0002285	lymphocyte activation involved in immune response	14/479	213/18870	0.00113098	0.0143711	0.0119283	51176/3329/100/9452/3146/4602/11151/9678/79915/7468/6194/165918/10459/2625	14
1114	Mac_T	GO:0031577	spindle checkpoint signaling	6/479	47/18870	0.00115224	0.0145937	0.0121131	1063/57082/10459/55755/701/9184	6
1115	Mac_T	GO:0050670	regulation of lymphocyte proliferation	15/479	238/18870	0.00116745	0.0147044	0.0122049	100/4282/916/23240/3146/11151/79915/6188/7535/51237/10451/3485/3280/1739/5588	15
1116	Mac_T	GO:2001242	regulation of intrinsic apoptotic signaling pathway	13/479	190/18870	0.00116851	0.0147044	0.0122049	4282/3932/3070/1984/79915/6188/3065/3301/6201/6421/23028/1032/142	13
1117	Mac_T	GO:0048026	positive regulation of mRNA splicing, via spliceosome	5/479	32/18870	0.00117965	0.0147968	0.0122816	4691/5935/27316/6434/3312	5
1118	Mac_T	GO:0021543	pallium development	13/479	191/18870	0.00122564	0.0153245	0.0127196	1021/51176/23224/2146/5901/3065/259266/23236/23028/3014/9928/493/6434	13
1119	Mac_T	GO:0006304	DNA modification	9/479	103/18870	0.00123578	0.0153528	0.0127431	9760/3070/2146/3182/1786/10664/51742/2625/142	9
1120	Mac_T	GO:0009408	response to heat	9/479	103/18870	0.00123578	0.0153528	0.0127431	3337/3304/3320/3310/3326/9531/26973/3301/11168	9
1121	Mac_T	GO:0072332	intrinsic apoptotic signaling pathway by p53 class mediator	8/479	84/18870	0.00131114	0.0162374	0.0134773	4282/51741/1984/79915/3094/6201/54541/23028	8
1122	Mac_T	GO:2001233	regulation of apoptotic signaling pathway	21/479	398/18870	0.00135747	0.0167567	0.0139083	3304/3148/4282/3932/51741/3070/5925/1984/11124/79915/6188/7001/2950/3065/3301/6201/6421/23028/1032/142/672	21
1123	Mac_T	GO:0006346	DNA methylation-dependent heterochromatin formation	5/479	33/18870	0.00136167	0.0167567	0.0139083	3070/3065/80063/1786/23028	5
1124	Mac_T	GO:0032944	regulation of mononuclear cell proliferation	15/479	242/18870	0.00137816	0.0169063	0.0140325	100/4282/916/23240/3146/11151/79915/6188/7535/51237/10451/3485/3280/1739/5588	15
1125	Mac_T	GO:0034605	cellular response to heat	7/479	66/18870	0.00139023	0.0170008	0.014111	3337/3304/3320/3310/3326/9531/26973	7
1126	Mac_T	GO:0032784	regulation of DNA-templated transcription elongation	9/479	105/18870	0.00141546	0.0172073	0.0142823	2146/10189/11198/3150/165918/27336/284695/142/10915	9
1127	Mac_T	GO:0045069	regulation of viral genome replication	8/479	85/18870	0.00141593	0.0172073	0.0142823	7153/8519/8815/6733/6732/9636/3609/56829	8
1128	Mac_T	GO:0034244	negative regulation of transcription elongation by RNA polymerase II	4/479	20/18870	0.00143791	0.0173669	0.0144148	2146/165918/142/10915	4
1129	Mac_T	GO:0033628	regulation of cell adhesion mediated by integrin	6/479	49/18870	0.00143797	0.0173669	0.0144148	100/916/5140/8631/340533/83700	6
1130	Mac_T	GO:0051099	positive regulation of binding	10/479	127/18870	0.00149933	0.0180521	0.0149836	3925/3148/3146/4830/5925/5901/51053/9750/3280/2625	10
1131	Mac_T	GO:0048511	rhythmic process	17/479	296/18870	0.0015628	0.0187101	0.0155297	7298/7153/2146/5111/5591/3184/3065/3399/51514/10236/6421/2776/7150/5936/11335/1407/142	17
1132	Mac_T	GO:0032743	positive regulation of interleukin-2 production	5/479	34/18870	0.00156357	0.0187101	0.0155297	916/861/6711/6188/5588	5
1133	Mac_T	GO:0006305	DNA alkylation	6/479	50/18870	0.00159962	0.0190247	0.0157909	3070/2146/1786/10664/51742/142	6
1134	Mac_T	GO:0006306	DNA methylation	6/479	50/18870	0.00159962	0.0190247	0.0157909	3070/2146/1786/10664/51742/142	6
1135	Mac_T	GO:0044774	mitotic DNA integrity checkpoint signaling	8/479	87/18870	0.0016454	0.0195098	0.0161935	63967/5591/51514/1111/11073/641/990/672	8
1136	Mac_T	GO:0032070	regulation of deoxyribonuclease activity	3/479	10/18870	0.0017075	0.0200632	0.0166528	3146/5111/6188	3
1137	Mac_T	GO:0033314	mitotic DNA replication checkpoint signaling	3/479	10/18870	0.0017075	0.0200632	0.0166528	63967/11073/990	3
1138	Mac_T	GO:0034351	negative regulation of glial cell apoptotic process	3/479	10/18870	0.0017075	0.0200632	0.0166528	5578/5583/5885	3
1139	Mac_T	GO:0051303	establishment of chromosome localization	9/479	108/18870	0.00172382	0.020194	0.0167614	1063/5925/57082/10726/1731/9928/1062/113130/9184	9
1140	Mac_T	GO:0033627	cell adhesion mediated by integrin	8/479	88/18870	0.00177067	0.0204991	0.0170146	100/916/3676/5140/8631/2131/340533/83700	8
1141	Mac_T	GO:0010332	response to gamma radiation	6/479	51/18870	0.00177472	0.0204991	0.0170146	5591/7520/23028/3014/7486/142	6
1142	Mac_T	GO:0035036	sperm-egg recognition	6/479	51/18870	0.00177472	0.0204991	0.0170146	10576/6950/7203/22948/10574/10575	6
1143	Mac_T	GO:0030900	forebrain development	21/479	407/18870	0.00178308	0.0204991	0.0170146	1021/3337/51176/23224/9760/113246/6935/64919/2146/5901/3065/259266/2131/23236/6240/23028/3014/9928/3280/493/6434	21
1144	Mac_T	GO:0002821	positive regulation of adaptive immune response	10/479	130/18870	0.00178613	0.0204991	0.0170146	3329/100/913/79915/7468/8631/10459/10666/5588/2625	10
1145	Mac_T	GO:0009112	nucleobase metabolic process	5/479	35/18870	0.00178665	0.0204991	0.0170146	7298/100/10606/6240/23028	5
1146	Mac_T	GO:1902253	regulation of intrinsic apoptotic signaling pathway by p53 class mediator	5/479	35/18870	0.00178665	0.0204991	0.0170146	4282/1984/79915/6201/23028	5
1147	Mac_T	GO:0002312	B cell activation involved in immune response	8/479	90/18870	0.00204374	0.0233802	0.0194059	3329/100/9452/9678/79915/7468/165918/10459	8
1148	Mac_T	GO:0032069	regulation of nuclease activity	4/479	22/18870	0.00208559	0.0237198	0.0196878	3148/3146/5111/6188	4
1149	Mac_T	GO:0048025	negative regulation of mRNA splicing, via spliceosome	4/479	22/18870	0.00208559	0.0237198	0.0196878	708/3181/27316/10772	4
1150	Mac_T	GO:0009259	ribonucleotide metabolic process	20/479	385/18870	0.00209874	0.0238	0.0197544	3304/100/4830/10606/5901/79621/60481/197322/4725/11332/3094/5150/7371/55967/1739/1740/516/3312/142/3157	20
1151	Mac_T	GO:0002244	hematopoietic progenitor cell differentiation	10/479	133/18870	0.00211575	0.0239233	0.0198567	1021/6659/7153/4602/5591/2131/7520/83700/3280/2625	10
1152	Mac_T	GO:0007163	establishment or maintenance of cell polarity	14/479	228/18870	0.00214417	0.0241746	0.0200653	3320/917/3326/56288/9750/55755/83700/9124/3280/1739/1740/2625/9585/2195	14
1153	Mac_T	GO:0010950	positive regulation of endopeptidase activity	11/479	156/18870	0.002157	0.0242492	0.0201272	3329/3932/3336/3146/6188/5721/26999/9994/5720/489/841	11
1154	Mac_T	GO:0050685	positive regulation of mRNA processing	5/479	37/18870	0.00230142	0.0253052	0.0210037	4691/5935/27316/6434/3312	5
1155	Mac_T	GO:0033632	regulation of cell-cell adhesion mediated by integrin	3/479	11/18870	0.00230379	0.0253052	0.0210037	100/916/8631	3
1156	Mac_T	GO:0034350	regulation of glial cell apoptotic process	3/479	11/18870	0.00230379	0.0253052	0.0210037	5578/5583/5885	3
1157	Mac_T	GO:0042276	error-prone translesion synthesis	3/479	11/18870	0.00230379	0.0253052	0.0210037	7398/10459/5425	3
1158	Mac_T	GO:0046643	regulation of gamma-delta T cell activation	3/479	11/18870	0.00230379	0.0253052	0.0210037	6659/51176/6932	3
1159	Mac_T	GO:0071481	cellular response to X-ray	3/479	11/18870	0.00230379	0.0253052	0.0210037	7520/64710/2625	3
1160	Mac_T	GO:0085020	protein K6-linked ubiquitination	3/479	11/18870	0.00230379	0.0253052	0.0210037	27338/29089/672	3
1161	Mac_T	GO:0009988	cell-cell recognition	7/479	72/18870	0.00230935	0.0253052	0.0210037	10576/6950/7203/22948/10574/10575/1739	7
1162	Mac_T	GO:0071478	cellular response to radiation	12/479	181/18870	0.00232157	0.0253052	0.0210037	5111/7520/10856/64710/641/23028/3014/7486/1407/2625/142/672	12
1163	Mac_T	GO:0071214	cellular response to abiotic stimulus	18/479	334/18870	0.00232229	0.0253052	0.0210037	5111/9531/1111/27347/7520/10856/64710/641/23028/3014/1265/9994/7486/1407/2625/142/841/672	18
1164	Mac_T	GO:0104004	cellular response to environmental stimulus	18/479	334/18870	0.00232229	0.0253052	0.0210037	5111/9531/1111/27347/7520/10856/64710/641/23028/3014/1265/9994/7486/1407/2625/142/841/672	18
1165	Mac_T	GO:0045744	negative regulation of G protein-coupled receptor signaling pathway	6/479	54/18870	0.00238782	0.0259468	0.0215363	3925/100/636/157/493/1407	6
1166	Mac_T	GO:0032785	negative regulation of DNA-templated transcription, elongation	4/479	23/18870	0.00247458	0.0268148	0.0222568	2146/165918/142/10915	4
1167	Mac_T	GO:0010569	regulation of double-strand break repair via homologous recombination	7/479	73/18870	0.00249966	0.0268552	0.0222903	1111/10856/2521/10459/23028/23347/142	7
1168	Mac_T	GO:0045661	regulation of myoblast differentiation	7/479	73/18870	0.00249966	0.0268552	0.0222903	6659/6599/3399/6597/23236/9750/6605	7
1169	Mac_T	GO:0042752	regulation of circadian rhythm	9/479	114/18870	0.00250125	0.0268552	0.0222903	7153/2146/5591/3184/6421/2776/5936/1407/142	9
1170	Mac_T	GO:0071674	mononuclear cell migration	13/479	207/18870	0.00250585	0.0268552	0.0222903	3146/11151/3676/708/7535/2131/23236/27347/9750/6223/51192/83700/2625	13
1171	Mac_T	GO:0001510	RNA methylation	8/479	93/18870	0.00251432	0.0268722	0.0223044	6636/6635/6628/6632/6633/2091/6634/6637	8
1172	Mac_T	GO:1902229	regulation of intrinsic apoptotic signaling pathway in response to DNA damage	5/479	38/18870	0.00259571	0.0276663	0.0229635	4282/79915/6188/23028/1032	5
1173	Mac_T	GO:0006986	response to unfolded protein	10/479	137/18870	0.00262965	0.0279517	0.0232004	3337/3320/3329/10808/3310/3336/3326/9531/3301/3312	10
1174	Mac_T	GO:0019693	ribose phosphate metabolic process	20/479	393/18870	0.00265871	0.0281107	0.0233324	3304/100/4830/10606/5901/79621/60481/197322/4725/11332/3094/5150/7371/55967/1739/1740/516/3312/142/3157	20
1175	Mac_T	GO:0009141	nucleoside triphosphate metabolic process	12/479	184/18870	0.00265903	0.0281107	0.0233324	3304/7298/100/1854/4830/5901/4725/7371/55967/516/3312/142	12
1176	Mac_T	GO:0050000	chromosome localization	9/479	116/18870	0.00281459	0.0296749	0.0246307	1063/5925/57082/10726/1731/9928/1062/113130/9184	9
1177	Mac_T	GO:0051321	meiotic cell cycle	16/479	287/18870	0.00285299	0.0299987	0.0248994	7153/10051/10592/83990/23310/259266/5885/23236/1731/51759/5932/3014/9232/10388/9184/84057	16
1178	Mac_T	GO:0002320	lymphoid progenitor cell differentiation	4/479	24/18870	0.00291065	0.0303595	0.0251989	6659/5591/3280/2625	4
1179	Mac_T	GO:0050686	negative regulation of mRNA processing	4/479	24/18870	0.00291065	0.0303595	0.0251989	708/3181/27316/10772	4
1180	Mac_T	GO:2000001	regulation of DNA damage checkpoint	4/479	24/18870	0.00291065	0.0303595	0.0251989	79621/79968/1407/672	4
1181	Mac_T	GO:0045088	regulation of innate immune response	21/479	425/18870	0.00298105	0.0309429	0.0256831	3304/3320/3329/3148/3146/84937/5591/708/8815/140609/4068/7520/6421/9636/10225/6223/9782/10666/3312/142/841	21
1182	Mac_T	GO:0000491	small nucleolar ribonucleoprotein complex assembly	3/479	12/18870	0.00301418	0.0309429	0.0256831	10856/4809/55164	3
1183	Mac_T	GO:0002328	pro-B cell differentiation	3/479	12/18870	0.00301418	0.0309429	0.0256831	6659/5591/3280	3
1184	Mac_T	GO:0033629	negative regulation of cell adhesion mediated by integrin	3/479	12/18870	0.00301418	0.0309429	0.0256831	5140/340533/83700	3
1185	Mac_T	GO:0140588	chromatin looping	3/479	12/18870	0.00301418	0.0309429	0.0256831	5885/10664/23137	3
1186	Mac_T	GO:1901535	regulation of DNA demethylation	3/479	12/18870	0.00301418	0.0309429	0.0256831	9760/3182/2625	3
1187	Mac_T	GO:0042098	T cell proliferation	13/479	213/18870	0.00320609	0.0328267	0.0272467	916/23240/3146/11151/6194/6188/7001/896/7535/3485/3280/1739/5588	13
1188	Mac_T	GO:1903046	meiotic cell cycle process	13/479	214/18870	0.00333695	0.0338619	0.0281059	7153/10051/10592/83990/23310/259266/5885/23236/1731/51759/9232/10388/84057	13
1189	Mac_T	GO:0032609	type II interferon production	9/479	119/18870	0.00334192	0.0338619	0.0281059	3329/916/3146/708/914/9636/10225/10666/2625	9
1190	Mac_T	GO:0032649	regulation of type II interferon production	9/479	119/18870	0.00334192	0.0338619	0.0281059	3329/916/3146/708/914/9636/10225/10666/2625	9
1191	Mac_T	GO:1901989	positive regulation of cell cycle phase transition	9/479	119/18870	0.00334192	0.0338619	0.0281059	2146/6241/5925/79915/51514/23236/6240/113130/990	9
1192	Mac_T	GO:0009123	nucleoside monophosphate metabolic process	7/479	77/18870	0.00338406	0.0342	0.0283866	7298/100/1854/10606/7371/1739/1740	7
1193	Mac_T	GO:0009147	pyrimidine nucleoside triphosphate metabolic process	4/479	25/18870	0.00339645	0.0342366	0.028417	7298/1854/4830/7371	4
1194	Mac_T	GO:0030099	myeloid cell differentiation	21/479	430/18870	0.0034143	0.0343278	0.0284926	1021/3304/5578/51176/3148/8364/814/2113/861/4602/5591/5925/6194/54892/3276/9636/6223/94081/2625/142/841	21
1195	Mac_T	GO:0019058	viral life cycle	17/479	321/18870	0.00362158	0.0363183	0.0301448	3304/3146/7153/3326/8519/3921/10572/8815/6733/6732/9636/3609/64710/27336/56829/23137/3312	17
1196	Mac_T	GO:0035865	cellular response to potassium ion	3/479	13/18870	0.00384513	0.0381676	0.0316797	140609/27347/1740	3
1197	Mac_T	GO:0042492	gamma-delta T cell differentiation	3/479	13/18870	0.00384513	0.0381676	0.0316797	6659/51176/6932	3
1198	Mac_T	GO:0043383	negative T cell selection	3/479	13/18870	0.00384513	0.0381676	0.0316797	916/387357/7535	3
1199	Mac_T	GO:1902947	regulation of tau-protein kinase activity	3/479	13/18870	0.00384513	0.0381676	0.0316797	3320/3326/5925	3
1200	Mac_T	GO:0033622	integrin activation	4/479	26/18870	0.00393459	0.0388525	0.0322482	51237/8631/9928/83700	4
1201	Mac_T	GO:1902455	negative regulation of stem cell population maintenance	4/479	26/18870	0.00393459	0.0388525	0.0322482	3065/5928/58516/51742	4
1202	Mac_T	GO:0030518	intracellular steroid hormone receptor signaling pathway	9/479	122/18870	0.00394401	0.0388525	0.0322482	56937/3065/6597/3301/23028/10728/1407/142/672	9
1203	Mac_T	GO:0009394	2'-deoxyribonucleotide metabolic process	5/479	42/18870	0.00404939	0.0397745	0.0330135	7298/100/1854/6241/6240	5
1204	Mac_T	GO:0018205	peptidyl-lysine modification	13/479	219/18870	0.004058	0.0397745	0.0330135	6659/9759/64754/6418/284058/9031/3094/10208/10856/26354/6613/23137/672	13
1205	Mac_T	GO:0140013	meiotic nuclear division	12/479	194/18870	0.00408268	0.0399161	0.033131	7153/10051/10592/83990/259266/5885/23236/1731/51759/9232/10388/84057	12
1206	Mac_T	GO:0032984	protein-containing complex disassembly	14/479	245/18870	0.00410108	0.0399958	0.0331972	3925/6599/1984/6418/6711/6749/22974/6597/11198/50810/54541/3159/6605/3312	14
1207	Mac_T	GO:0010952	positive regulation of peptidase activity	11/479	170/18870	0.00418008	0.0406646	0.0337523	3329/3932/3336/3146/6188/5721/26999/9994/5720/489/841	11
1208	Mac_T	GO:0002824	positive regulation of adaptive immune response based on somatic recombination of immune receptors built from immunoglobulin superfamily domains	9/479	124/18870	0.00439037	0.0424984	0.0352744	3329/100/913/79915/7468/10459/10666/5588/2625	9
1209	Mac_T	GO:0046632	alpha-beta T cell differentiation	9/479	124/18870	0.00439037	0.0424984	0.0352744	51176/9760/100/3146/64919/861/4602/7535/2625	9
1210	Mac_T	GO:0008630	intrinsic apoptotic signaling pathway in response to DNA damage	8/479	102/18870	0.00444717	0.0429153	0.0356204	4282/5591/79915/6188/54541/23028/1032/672	8
1211	Mac_T	GO:0051656	establishment of organelle localization	22/479	469/18870	0.00445671	0.0429153	0.0356204	23224/1063/4648/56288/5925/51203/3676/636/5901/57082/10726/4001/1731/27040/55755/6209/9928/1739/1062/54874/113130/9184	22
1212	Mac_T	GO:0009124	nucleoside monophosphate biosynthetic process	5/479	43/18870	0.00448845	0.0429153	0.0356204	7298/100/1854/10606/7371	5
1213	Mac_T	GO:0009262	deoxyribonucleotide metabolic process	5/479	43/18870	0.00448845	0.0429153	0.0356204	7298/100/1854/6241/6240	5
1214	Mac_T	GO:0019692	deoxyribose phosphate metabolic process	5/479	43/18870	0.00448845	0.0429153	0.0356204	7298/100/1854/6241/6240	5
1215	Mac_T	GO:0046037	GMP metabolic process	4/479	27/18870	0.00452758	0.0429735	0.0356687	100/10606/1739/1740	4
1216	Mac_T	GO:0071480	cellular response to gamma radiation	4/479	27/18870	0.00452758	0.0429735	0.0356687	7520/23028/3014/7486	4
1217	Mac_T	GO:2001032	regulation of double-strand break repair via nonhomologous end joining	4/479	27/18870	0.00452758	0.0429735	0.0356687	5591/7468/10459/23347	4
1218	Mac_T	GO:0044773	mitotic DNA damage checkpoint signaling	7/479	83/18870	0.0051341	0.0483284	0.0401134	63967/5591/51514/1111/11073/641/672	7
1219	Mac_T	GO:0000470	maturation of LSU-rRNA	4/479	28/18870	0.00517788	0.0483284	0.0401134	55651/11224/4809/4736	4
1220	Mac_T	GO:2000756	regulation of peptidyl-lysine acetylation	4/479	28/18870	0.00517788	0.0483284	0.0401134	6659/6418/9031/672	4
1221	Mac_T	GO:2000819	regulation of nucleotide-excision repair	4/479	28/18870	0.00517788	0.0483284	0.0401134	6599/6597/605/6605	4
1222	Mac_T	GO:0072331	signal transduction by p53 class mediator	11/479	175/18870	0.00519087	0.0483284	0.0401134	6659/4282/51741/1984/79915/1111/3094/6201/54541/6209/23028	11
1223	Mac_T	GO:0016447	somatic recombination of immunoglobulin gene segments	6/479	63/18870	0.00519087	0.0483284	0.0401134	3329/5591/79915/7468/165918/10459	6
1224	Mac_T	GO:0032623	interleukin-2 production	6/479	63/18870	0.00519087	0.0483284	0.0401134	916/861/6711/6188/5588/2625	6
1225	Mac_T	GO:0032663	regulation of interleukin-2 production	6/479	63/18870	0.00519087	0.0483284	0.0401134	916/861/6711/6188/5588/2625	6
1226	Mac_T	GO:0042102	positive regulation of T cell proliferation	8/479	105/18870	0.00529614	0.049191	0.0408294	916/3146/11151/6188/7535/3485/3280/5588	8

## Sheet: Mac_T vs T cell clusters
	Cluster	ID	Description	GeneRatio	BgRatio	pvalue	p.adjust	qvalue	geneID	Count
1	Naive_T	GO:0046643	regulation of gamma-delta T cell activation	2025-03-14	11/18870	5.34528e-08	2.71694e-05	1.5737e-05	6659/51176/6932	3
2	Naive_T	GO:0042492	gamma-delta T cell differentiation	2025-03-14	13/18870	9.25705e-08	2.71694e-05	1.5737e-05	6659/51176/6932	3
3	Naive_T	GO:0046629	gamma-delta T cell activation	2025-03-14	25/18870	7.4055e-07	0.000144901	8.3929e-05	6659/51176/6932	3
4	Naive_T	GO:0030217	T cell differentiation	2025-04-14	307/18870	6.04622e-05	0.00703413	0.00407428	6659/51176/6932/387357	4
5	Naive_T	GO:0045445	myoblast differentiation	2025-03-14	110/18870	6.69514e-05	0.00703413	0.00407428	6659/5925/3399	3
6	Naive_T	GO:1902105	regulation of leukocyte differentiation	2025-04-14	321/18870	7.18991e-05	0.00703413	0.00407428	6659/51176/5925/6932	4
7	Naive_T	GO:0050863	regulation of T cell activation	2025-04-14	381/18870	0.000139488	0.0111068	0.00643324	6659/51176/6932/10808	4
8	Naive_T	GO:0045662	negative regulation of myoblast differentiation	2025-02-14	25/18870	0.000151858	0.0111068	0.00643324	6659/3399	2
9	Naive_T	GO:1903706	regulation of hemopoiesis	2025-04-14	417/18870	0.000197368	0.0111068	0.00643324	6659/51176/5925/6932	4
10	Naive_T	GO:0030098	lymphocyte differentiation	2025-04-14	429/18870	0.000220041	0.0111068	0.00643324	6659/51176/6932/387357	4
11	Naive_T	GO:0051085	chaperone cofactor-dependent protein refolding	2025-02-14	32/18870	0.000250327	0.0111068	0.00643324	10808/3337	2
12	Naive_T	GO:0071353	cellular response to interleukin-4	2025-02-14	34/18870	0.000282892	0.0111068	0.00643324	51176/6932	2
13	Naive_T	GO:0045580	regulation of T cell differentiation	2025-03-14	181/18870	0.000292287	0.0111068	0.00643324	6659/51176/6932	3
14	Naive_T	GO:1902107	positive regulation of leukocyte differentiation	2025-03-14	185/18870	0.000311663	0.0111068	0.00643324	6659/51176/5925	3
15	Naive_T	GO:1903708	positive regulation of hemopoiesis	2025-03-14	185/18870	0.000311663	0.0111068	0.00643324	6659/51176/5925	3
16	Naive_T	GO:0070670	response to interleukin-4	2025-02-14	36/18870	0.000317417	0.0111068	0.00643324	51176/6932	2
17	Naive_T	GO:0051084	'de novo' post-translational protein folding	2025-02-14	37/18870	0.000335413	0.0111068	0.00643324	10808/3337	2
18	Naive_T	GO:1903131	mononuclear cell differentiation	2025-04-14	481/18870	0.000340583	0.0111068	0.00643324	6659/51176/6932/387357	4
19	Naive_T	GO:0006458	'de novo' protein folding	2025-02-14	41/18870	0.000412271	0.012737	0.00737749	10808/3337	2
20	Naive_T	GO:0045619	regulation of lymphocyte differentiation	2025-03-14	212/18870	0.000464452	0.0136317	0.00789568	6659/51176/6932	3
21	Naive_T	GO:0050870	positive regulation of T cell activation	2025-03-14	251/18870	0.000759428	0.0212278	0.0122955	6659/51176/10808	3
22	Naive_T	GO:0014009	glial cell proliferation	2025-02-14	59/18870	0.000853702	0.0223134	0.0129243	6659/5925	2
23	Naive_T	GO:0002763	positive regulation of myeloid leukocyte differentiation	2025-02-14	60/18870	0.000882766	0.0223134	0.0129243	51176/5925	2
24	Naive_T	GO:0003179	heart valve morphogenesis	2025-02-14	61/18870	0.000912304	0.0223134	0.0129243	6659/5925	2
25	Naive_T	GO:1903039	positive regulation of leukocyte cell-cell adhesion	2025-03-14	275/18870	0.000989341	0.0232297	0.013455	6659/51176/10808	3
26	Naive_T	GO:0003170	heart valve development	2025-02-14	73/18870	0.00130348	0.0283387	0.0164142	6659/5925	2
27	Naive_T	GO:0045661	regulation of myoblast differentiation	2025-02-14	73/18870	0.00130348	0.0283387	0.0164142	6659/3399	2
28	Naive_T	GO:0061077	chaperone-mediated protein folding	2025-02-14	75/18870	0.00137523	0.0288307	0.0166992	10808/3337	2
29	Naive_T	GO:0060070	canonical Wnt signaling pathway	2025-03-14	316/18870	0.00147642	0.0298849	0.0173098	6659/51176/6932	3
30	Naive_T	GO:0022409	positive regulation of cell-cell adhesion	2025-03-14	322/18870	0.0015583	0.0304907	0.0176607	6659/51176/10808	3
31	Naive_T	GO:0051251	positive regulation of lymphocyte activation	2025-03-14	330/18870	0.00167185	0.0316573	0.0183364	6659/51176/10808	3
32	Naive_T	GO:0051101	regulation of DNA binding	2025-02-14	85/18870	0.00176173	0.0318492	0.0184476	51176/5925	2
33	Naive_T	GO:0042063	gliogenesis	2025-03-14	338/18870	0.0017905	0.0318492	0.0184476	6659/51176/5925	3
34	Naive_T	GO:0007517	muscle organ development	2025-03-14	354/18870	0.00204342	0.035279	0.0204342	51176/5925/3399	3
35	Naive_T	GO:0002696	positive regulation of leukocyte activation	2025-03-14	380/18870	0.00250029	0.0408136	0.0236399	6659/51176/10808	3
36	Naive_T	GO:1903037	regulation of leukocyte cell-cell adhesion	2025-03-14	382/18870	0.00253785	0.0408136	0.0236399	6659/51176/10808	3
37	Naive_T	GO:0045639	positive regulation of myeloid cell differentiation	2025-02-14	103/18870	0.00257258	0.0408136	0.0236399	51176/5925	2
38	Naive_T	GO:0050867	positive regulation of cell activation	2025-03-14	396/18870	0.00281068	0.0434176	0.0251482	6659/51176/10808	3
39	Naive_T	GO:0045582	positive regulation of T cell differentiation	2025-02-14	116/18870	0.0032486	0.0473733	0.0274394	6659/51176	2
40	Naive_T	GO:0007159	leukocyte cell-cell adhesion	2025-03-14	419/18870	0.0032973	0.0473733	0.0274394	6659/51176/10808	3
41	Naive_T	GO:0034502	protein localization to chromosome	2025-02-14	119/18870	0.00341521	0.0473733	0.0274394	51176/5925	2
42	Naive_T	GO:0030326	embryonic limb morphogenesis	2025-02-14	120/18870	0.00347163	0.0473733	0.0274394	51176/3899	2
43	Naive_T	GO:0035113	embryonic appendage morphogenesis	2025-02-14	120/18870	0.00347163	0.0473733	0.0274394	51176/3899	2
44	Naive_T	GO:0060537	muscle tissue development	2025-03-14	433/18870	0.0036175	0.0473733	0.0274394	221476/51176/5925	3
45	Naive_T	GO:0002761	regulation of myeloid leukocyte differentiation	2025-02-14	124/18870	0.00370166	0.0473733	0.0274394	51176/5925	2
46	Naive_T	GO:0031400	negative regulation of protein modification process	2025-03-14	437/18870	0.00371239	0.0473733	0.0274394	6659/5925/9467	3
47	Naive_T	GO:0010720	positive regulation of cell development	2025-03-14	444/18870	0.00388211	0.0484851	0.0280834	6659/51176/5925	3
48	Naive_T	GO:0045621	positive regulation of lymphocyte differentiation	2025-02-14	130/18870	0.00405975	0.0496474	0.0287566	6659/51176	2
49	Naive_T	GO:0042476	odontogenesis	2025-02-14	132/18870	0.00418258	0.0496538	0.0287603	51176/3399	2
50	Naive_T	GO:0016055	Wnt signaling pathway	2025-03-14	459/18870	0.00426176	0.0496538	0.0287603	6659/51176/6932	3
51	Naive_T	GO:0198738	cell-cell signaling by wnt	2025-03-14	461/18870	0.00431404	0.0496538	0.0287603	6659/51176/6932	3
52	Proli_T	GO:0007059	chromosome segregation	67/161	424/18870	5.29276e-68	8.84421e-65	7.2483e-65	7153/1063/4288/51203/259266/22974/203068/57082/1062/11065/332/9787/64151/10051/983/9232/9928/9055/24137/10403/891/11004/9212/701/83540/113130/146909/157570/10592/3832/57405/5885/55143/699/157313/26271/84057/10460/387103/991/23310/54892/79019/23397/1894/4605/7272/9493/151648/221150/83990/3833/401541/3619/55355/4085/9133/79682/55755/151246/6491/11130/3835/2177/55839/672/9918	67
53	Proli_T	GO:0000280	nuclear division	61/161	441/18870	9.35081e-58	7.8126e-55	6.40284e-55	7153/1063/4288/51203/259266/22974/57082/1062/11065/332/27338/9787/64151/10051/983/9232/9928/9055/24137/10403/891/11004/9212/701/83540/113130/146909/10592/3832/57405/5885/55143/699/157313/26271/84057/9585/675/991/23310/54892/23397/54443/4605/7272/9493/10635/1164/151648/83990/3833/3619/4085/9133/55755/11130/3835/2177/995/8815/9918	61
54	Proli_T	GO:0048285	organelle fission	61/161	488/18870	5.42927e-55	3.0241e-52	2.47841e-52	7153/1063/4288/51203/259266/22974/57082/1062/11065/332/27338/9787/64151/10051/983/9232/9928/9055/24137/10403/891/11004/9212/701/83540/113130/146909/10592/3832/57405/5885/55143/699/157313/26271/84057/9585/675/991/23310/54892/23397/54443/4605/7272/9493/10635/1164/151648/83990/3833/3619/4085/9133/55755/11130/3835/2177/995/8815/9918	61
55	Proli_T	GO:0098813	nuclear chromosome segregation	53/161	312/18870	1.1426e-54	4.77323e-52	3.91192e-52	7153/1063/51203/259266/22974/57082/1062/11065/332/9787/64151/10051/983/9232/9928/9055/24137/10403/891/11004/9212/701/83540/113130/146909/10592/3832/57405/5885/55143/699/26271/84057/10460/991/23310/54892/23397/1894/4605/7272/9493/151648/83990/3833/3619/4085/9133/55755/11130/3835/2177/9918	53
56	Proli_T	GO:0140014	mitotic nuclear division	50/161	274/18870	4.36888e-53	1.46008e-50	1.19661e-50	1063/4288/51203/22974/57082/1062/11065/332/27338/9787/64151/10051/983/9928/9055/24137/10403/891/11004/9212/701/83540/113130/146909/10592/3832/57405/5885/55143/699/157313/26271/9585/991/23310/54892/23397/54443/4605/7272/9493/3833/3619/4085/55755/11130/3835/995/8815/9918	50
57	Proli_T	GO:0000070	mitotic sister chromatid segregation	43/161	184/18870	1.91962e-50	5.34614e-48	4.38145e-48	1063/51203/22974/57082/1062/11065/332/9787/64151/10051/983/9928/9055/24137/10403/891/11004/9212/701/83540/113130/146909/10592/3832/57405/5885/55143/699/26271/991/23310/54892/23397/4605/7272/9493/3833/3619/4085/55755/11130/3835/9918	43
58	Proli_T	GO:0000819	sister chromatid segregation	45/161	225/18870	1.61201e-49	3.84809e-47	3.15372e-47	7153/1063/51203/22974/57082/1062/11065/332/9787/64151/10051/983/9928/9055/24137/10403/891/11004/9212/701/83540/113130/146909/10592/3832/57405/5885/55143/699/26271/10460/991/23310/54892/23397/4605/7272/9493/3833/3619/4085/55755/11130/3835/9918	45
59	Proli_T	GO:0051983	regulation of chromosome segregation	34/161	131/18870	1.71878e-41	3.5901e-39	2.94228e-39	1063/4288/57082/1062/11065/332/9787/64151/10051/983/10403/891/11004/9212/701/83540/10592/57405/5885/55143/699/157313/26271/10460/991/23310/54892/23397/7272/3619/4085/55755/11130/9918	34
60	Proli_T	GO:1905818	regulation of chromosome separation	28/161	74/18870	1.42256e-39	2.64122e-37	2.16462e-37	1063/57082/11065/332/9787/64151/10051/10403/891/9212/701/83540/10592/57405/5885/55143/699/26271/991/23310/54892/23397/7272/3619/4085/55755/11130/9918	28
61	Proli_T	GO:0051304	chromosome separation	28/161	81/18870	3.05875e-38	5.11118e-36	4.18888e-36	1063/57082/11065/332/9787/64151/10051/10403/891/9212/701/83540/10592/57405/5885/55143/699/26271/991/23310/54892/23397/7272/3619/4085/55755/11130/9918	28
62	Proli_T	GO:0044772	mitotic cell cycle phase transition	46/161	470/18870	6.66167e-36	1.01197e-33	8.29362e-34	1063/6241/57082/1062/51512/11065/332/27338/9787/983/9928/10403/891/9212/701/83540/113130/890/1163/57405/5885/55143/699/26271/9833/10460/991/6240/63967/54443/2146/79915/7272/1033/1164/3619/4085/9133/55755/6491/11130/995/672/1021/79621/2305	46
63	Proli_T	GO:0090068	positive regulation of cell cycle process	36/161	262/18870	2.79477e-33	3.89172e-31	3.18947e-31	51203/6241/11065/332/9787/64151/10051/983/9928/10403/891/9212/113130/10592/5885/55143/699/26271/11113/9585/991/23310/6240/54892/23397/2146/1894/79915/9493/10635/79733/3619/4085/6491/995/9918	36
64	Proli_T	GO:0045787	positive regulation of cell cycle	37/161	334/18870	1.04537e-30	1.3437e-28	1.10123e-28	51203/6241/11065/332/9787/64151/10051/983/9928/10403/891/9212/113130/10592/5885/55143/699/26271/11113/9585/675/991/23310/6240/54892/23397/2146/1894/79915/9493/10635/79733/3619/4085/6491/995/9918	37
65	Proli_T	GO:1901987	regulation of cell cycle phase transition	41/161	456/18870	2.08397e-30	2.48737e-28	2.03853e-28	1063/6241/57082/1062/51512/11065/332/9787/983/9928/10403/891/9212/701/83540/113130/57405/5885/55143/699/26271/3014/675/991/6240/63967/54443/2146/79915/7272/83990/3619/4085/55755/6491/11130/2177/995/672/1021/79621	41
66	Proli_T	GO:0007088	regulation of mitotic nuclear division	26/161	118/18870	9.57258e-30	1.03181e-27	8.45626e-28	1063/4288/51203/57082/11065/332/9787/10403/891/9212/701/83540/57405/5885/55143/699/157313/26271/9585/991/7272/3619/4085/55755/11130/995	26
67	Proli_T	GO:1901990	regulation of mitotic cell cycle phase transition	37/161	355/18870	9.87972e-30	1.03181e-27	8.45626e-28	1063/6241/57082/1062/51512/11065/332/9787/983/9928/10403/891/9212/701/83540/113130/57405/5885/55143/699/26271/991/6240/63967/54443/2146/79915/7272/3619/4085/55755/6491/11130/995/672/1021/79621	37
68	Proli_T	GO:0010965	regulation of mitotic sister chromatid separation	21/161	59/18870	3.65138e-29	3.58909e-27	2.94145e-27	1063/57082/11065/332/9787/10403/891/9212/701/83540/57405/5885/55143/699/26271/991/7272/3619/4085/55755/11130	21
69	Proli_T	GO:0033044	regulation of chromosome organization	32/161	247/18870	9.53915e-29	8.85551e-27	7.25756e-27	7153/1063/57082/1062/11065/332/9787/64151/10051/983/10403/891/9212/701/83540/10592/57405/5885/55143/699/26271/10460/991/23310/54892/23397/7272/3619/4085/55755/11130/9918	32
70	Proli_T	GO:0051783	regulation of nuclear division	27/161	146/18870	1.18402e-28	1.04131e-26	8.53412e-27	1063/4288/51203/57082/11065/332/9787/10403/891/9212/701/83540/57405/5885/55143/699/157313/26271/9585/991/7272/10635/3619/4085/55755/11130/995	27
71	Proli_T	GO:0051306	mitotic sister chromatid separation	21/161	62/18870	1.26805e-28	1.05946e-26	8.68283e-27	1063/57082/11065/332/9787/10403/891/9212/701/83540/57405/5885/55143/699/26271/991/7272/3619/4085/55755/11130	21
72	Proli_T	GO:0033047	regulation of mitotic sister chromatid segregation	20/161	54/18870	3.10663e-28	2.47199e-26	2.02593e-26	1063/57082/332/983/10403/891/9212/701/83540/57405/5885/55143/699/26271/991/7272/3619/4085/55755/11130	20
73	Proli_T	GO:0033045	regulation of sister chromatid segregation	24/161	104/18870	4.89429e-28	3.71743e-26	3.04664e-26	1063/57082/1062/11065/332/9787/983/10403/891/9212/701/83540/57405/5885/55143/699/26271/10460/991/7272/3619/4085/55755/11130	24
74	Proli_T	GO:0007091	metaphase/anaphase transition of mitotic cell cycle	23/161	94/18870	1.51418e-27	9.4914e-26	7.77871e-26	1063/57082/1062/11065/332/9787/10403/891/9212/701/83540/57405/5885/55143/699/26271/10460/991/7272/3619/4085/55755/11130	23
75	Proli_T	GO:0033046	negative regulation of sister chromatid segregation	19/161	48/18870	1.53362e-27	9.4914e-26	7.77871e-26	1063/57082/332/10403/891/9212/701/83540/57405/5885/55143/699/26271/991/7272/3619/4085/55755/11130	19
76	Proli_T	GO:0033048	negative regulation of mitotic sister chromatid segregation	19/161	48/18870	1.53362e-27	9.4914e-26	7.77871e-26	1063/57082/332/10403/891/9212/701/83540/57405/5885/55143/699/26271/991/7272/3619/4085/55755/11130	19
77	Proli_T	GO:0045841	negative regulation of mitotic metaphase/anaphase transition	19/161	48/18870	1.53362e-27	9.4914e-26	7.77871e-26	1063/57082/332/10403/891/9212/701/83540/57405/5885/55143/699/26271/991/7272/3619/4085/55755/11130	19
78	Proli_T	GO:2000816	negative regulation of mitotic sister chromatid separation	19/161	48/18870	1.53362e-27	9.4914e-26	7.77871e-26	1063/57082/332/10403/891/9212/701/83540/57405/5885/55143/699/26271/991/7272/3619/4085/55755/11130	19
79	Proli_T	GO:1902850	microtubule cytoskeleton organization involved in mitosis	27/161	163/18870	2.73574e-27	1.63265e-25	1.33804e-25	51203/22974/1062/332/9787/983/9055/24137/10403/891/9212/83540/3832/57405/55143/3925/10460/991/4605/7272/9493/3833/3619/4085/55755/9793/6491	27
80	Proli_T	GO:0044784	metaphase/anaphase transition of cell cycle	23/161	97/18870	3.37177e-27	1.94284e-25	1.59226e-25	1063/57082/1062/11065/332/9787/10403/891/9212/701/83540/57405/5885/55143/699/26271/10460/991/7272/3619/4085/55755/11130	23
81	Proli_T	GO:0051985	negative regulation of chromosome segregation	19/161	50/18870	3.98251e-27	2.07962e-25	1.70436e-25	1063/57082/332/10403/891/9212/701/83540/57405/5885/55143/699/26271/991/7272/3619/4085/55755/11130	19
82	Proli_T	GO:1902100	negative regulation of metaphase/anaphase transition of cell cycle	19/161	50/18870	3.98251e-27	2.07962e-25	1.70436e-25	1063/57082/332/10403/891/9212/701/83540/57405/5885/55143/699/26271/991/7272/3619/4085/55755/11130	19
83	Proli_T	GO:1905819	negative regulation of chromosome separation	19/161	50/18870	3.98251e-27	2.07962e-25	1.70436e-25	1063/57082/332/10403/891/9212/701/83540/57405/5885/55143/699/26271/991/7272/3619/4085/55755/11130	19
84	Proli_T	GO:0030071	regulation of mitotic metaphase/anaphase transition	22/161	90/18870	2.25437e-26	1.14153e-24	9.35545e-25	1063/57082/1062/11065/332/9787/10403/891/9212/701/83540/57405/5885/55143/699/26271/991/7272/3619/4085/55755/11130	22
85	Proli_T	GO:1902099	regulation of metaphase/anaphase transition of cell cycle	22/161	93/18870	5.01054e-26	2.46253e-24	2.01818e-24	1063/57082/1062/11065/332/9787/10403/891/9212/701/83540/57405/5885/55143/699/26271/991/7272/3619/4085/55755/11130	22
86	Proli_T	GO:0045839	negative regulation of mitotic nuclear division	19/161	56/18870	5.32722e-26	2.54337e-24	2.08443e-24	1063/57082/332/10403/891/9212/701/83540/57405/5885/55143/699/26271/991/7272/3619/4085/55755/11130	19
87	Proli_T	GO:0051784	negative regulation of nuclear division	19/161	63/18870	7.31384e-25	3.39484e-23	2.78225e-23	1063/57082/332/10403/891/9212/701/83540/57405/5885/55143/699/26271/991/7272/3619/4085/55755/11130	19
88	Proli_T	GO:0007051	spindle organization	27/161	202/18870	1.08552e-24	4.90246e-23	4.01783e-23	259266/22974/203068/1062/332/9787/9055/24137/10403/891/9212/83540/3832/57405/55143/3925/26271/10460/991/4605/7272/9493/3833/3619/9133/9793/6491	27
89	Proli_T	GO:0007094	mitotic spindle assembly checkpoint signaling	17/161	46/18870	4.00608e-24	1.67354e-22	1.37155e-22	1063/57082/332/10403/891/9212/701/83540/57405/55143/699/991/7272/3619/4085/55755/11130	17
90	Proli_T	GO:0071173	spindle assembly checkpoint signaling	17/161	46/18870	4.00608e-24	1.67354e-22	1.37155e-22	1063/57082/332/10403/891/9212/701/83540/57405/55143/699/991/7272/3619/4085/55755/11130	17
91	Proli_T	GO:0071174	mitotic spindle checkpoint signaling	17/161	46/18870	4.00608e-24	1.67354e-22	1.37155e-22	1063/57082/332/10403/891/9212/701/83540/57405/55143/699/991/7272/3619/4085/55755/11130	17
92	Proli_T	GO:0007052	mitotic spindle organization	23/161	130/18870	4.84188e-24	1.97336e-22	1.61727e-22	22974/1062/332/9787/9055/24137/10403/891/9212/83540/3832/57405/55143/3925/10460/991/4605/7272/9493/3833/3619/9793/6491	23
93	Proli_T	GO:0000075	cell cycle checkpoint signaling	26/161	192/18870	5.98775e-24	2.38227e-22	1.9524e-22	1063/57082/51512/332/983/10403/891/9212/701/83540/57405/55143/699/3014/675/991/63967/7272/83990/3619/4085/55755/11130/2177/672/79621	26
94	Proli_T	GO:0031577	spindle checkpoint signaling	17/161	47/18870	6.23088e-24	2.42135e-22	1.98442e-22	1063/57082/332/10403/891/9212/701/83540/57405/55143/699/991/7272/3619/4085/55755/11130	17
95	Proli_T	GO:1901988	negative regulation of cell cycle phase transition	29/161	277/18870	2.1559e-23	8.18754e-22	6.71012e-22	1063/57082/51512/332/983/10403/891/9212/701/83540/57405/5885/55143/699/26271/3014/675/991/63967/2146/7272/83990/3619/4085/55755/11130/2177/672/79621	29
96	Proli_T	GO:0010948	negative regulation of cell cycle process	30/161	320/18870	9.01158e-23	3.3463e-21	2.74247e-21	1063/57082/51512/332/983/10403/891/9212/701/83540/57405/5885/55143/699/26271/3014/675/991/63967/2146/7272/83990/79733/3619/4085/55755/11130/2177/672/79621	30
97	Proli_T	GO:2001251	negative regulation of chromosome organization	20/161	94/18870	9.80702e-23	3.56251e-21	2.91966e-21	7153/1063/57082/332/10403/891/9212/701/83540/57405/5885/55143/699/26271/991/7272/3619/4085/55755/11130	20
98	Proli_T	GO:1905820	positive regulation of chromosome separation	14/161	29/18870	4.22929e-22	1.50365e-20	1.23232e-20	11065/332/9787/64151/10051/9212/10592/55143/991/23310/54892/23397/3619/9918	14
99	Proli_T	GO:0007093	mitotic cell cycle checkpoint signaling	22/161	142/18870	1.04796e-21	3.64821e-20	2.9899e-20	1063/57082/51512/332/983/10403/891/9212/701/83540/57405/55143/699/991/63967/7272/3619/4085/55755/11130/2177/672	22
100	Proli_T	GO:1901991	negative regulation of mitotic cell cycle phase transition	24/161	196/18870	4.2363e-21	1.44467e-19	1.18398e-19	1063/57082/51512/332/983/10403/891/9212/701/83540/57405/5885/55143/699/26271/991/63967/2146/7272/3619/4085/55755/11130/672	24
101	Proli_T	GO:0045786	negative regulation of cell cycle	31/161	407/18870	7.9463e-21	2.65565e-19	2.17645e-19	1063/57082/51512/332/983/10403/891/9212/701/83540/57405/5885/55143/699/26271/3014/675/991/63967/2146/7272/83990/79733/3619/4085/55755/11130/2177/672/1021/79621	31
102	Proli_T	GO:0051984	positive regulation of chromosome segregation	13/161	27/18870	1.4036e-20	4.59886e-19	3.76901e-19	332/64151/10051/983/891/9212/10592/55143/23310/54892/23397/3619/9918	13
103	Proli_T	GO:0030261	chromosome condensation	15/161	47/18870	2.82353e-20	9.07332e-19	7.43607e-19	3009/7153/51203/3006/64151/10051/983/3008/3007/113130/10592/23310/54892/23397/9918	15
104	Proli_T	GO:1903046	meiotic cell cycle process	24/161	214/18870	3.49452e-20	1.10176e-18	9.02954e-19	7153/259266/10051/9232/10403/83540/10592/5885/26271/84057/675/991/23310/23397/7272/10635/1164/151648/83990/3619/9133/2177/995/9918	24
105	Proli_T	GO:0045930	negative regulation of mitotic cell cycle	25/161	248/18870	7.57139e-20	2.34293e-18	1.92015e-18	1063/57082/51512/332/983/10403/891/9212/701/83540/57405/5885/55143/699/26271/991/63967/2146/7272/3619/4085/55755/11130/2177/672	25
106	Proli_T	GO:0051310	metaphase chromosome alignment	18/161	96/18870	1.68029e-19	5.10502e-18	4.18383e-18	1063/57082/1062/332/9928/10403/891/11004/9212/83540/113130/57405/55143/1894/151648/3833/3619/3835	18
107	Proli_T	GO:0051321	meiotic cell cycle	26/161	287/18870	1.95526e-19	5.83434e-18	4.78156e-18	7153/259266/10051/9232/10403/83540/10592/5885/26271/3014/84057/675/991/23310/23397/7272/10635/1164/151648/83990/3619/9133/151246/2177/995/9918	26
108	Proli_T	GO:0050000	chromosome localization	19/161	116/18870	2.36201e-19	6.92443e-18	5.67494e-18	1063/57082/1062/332/9787/9928/10403/891/11004/9212/83540/113130/57405/55143/1894/151648/3833/3619/3835	19
109	Proli_T	GO:0051303	establishment of chromosome localization	18/161	108/18870	1.56858e-18	4.51913e-17	3.70367e-17	1063/57082/1062/332/9928/10403/891/11004/9212/83540/113130/57405/55143/1894/151648/3833/3619/3835	18
110	Proli_T	GO:0140013	meiotic nuclear division	21/161	194/18870	1.89003e-17	5.35295e-16	4.38703e-16	7153/259266/10051/9232/10403/83540/10592/5885/26271/84057/675/991/23397/7272/10635/1164/151648/83990/3619/9133/2177	21
111	Proli_T	GO:0044839	cell cycle G2/M phase transition	19/161	155/18870	6.61645e-17	1.84268e-15	1.51018e-15	1063/983/9928/10403/891/9212/890/5885/26271/9833/6240/63967/79915/9133/995/672/1021/79621/2305	19
112	Proli_T	GO:0051225	spindle assembly	18/161	133/18870	7.46539e-17	2.04503e-15	1.67601e-15	259266/22974/203068/332/9055/24137/10403/9212/3832/55143/26271/991/4605/9493/3833/3619/9133/6491	18
113	Proli_T	GO:0008608	attachment of spindle microtubules to kinetochore	13/161	49/18870	1.56434e-16	4.21616e-15	3.45537e-15	57082/1062/332/10403/891/11004/9212/83540/57405/55143/1894/151648/3619	13
114	Proli_T	GO:0140694	non-membrane-bounded organelle assembly	26/161	408/18870	1.11812e-15	2.96568e-14	2.43053e-14	1063/259266/22974/203068/1062/332/9787/9055/24137/10403/9212/3832/55143/26271/387103/991/54443/4605/9493/3833/3619/22995/9133/55755/6491/672	26
115	Proli_T	GO:0007080	mitotic metaphase chromosome alignment	13/161	57/18870	1.37557e-15	3.59152e-14	2.94345e-14	1062/332/9928/10403/891/11004/9212/83540/113130/55143/3833/3619/3835	13
116	Proli_T	GO:1901976	regulation of cell cycle checkpoint	12/161	46/18870	2.97651e-15	7.65191e-14	6.27115e-14	57082/332/10403/891/9212/55143/675/3619/4085/55755/672/79621	12
117	Proli_T	GO:0010639	negative regulation of organelle organization	24/161	363/18870	6.88015e-15	1.74193e-13	1.4276e-13	7153/1063/22974/57082/332/10403/891/9212/701/83540/57405/5885/55143/699/3925/26271/991/26586/7272/3619/4085/55755/11130/672	24
118	Proli_T	GO:0065004	protein-DNA complex assembly	20/161	240/18870	1.86146e-14	4.64254e-13	3.80481e-13	8364/3009/3148/1063/3006/1062/9787/3146/8351/3008/3007/8358/3014/10541/387103/401541/55355/55723/6749/55839	20
119	Proli_T	GO:0000281	mitotic cytokinesis	14/161	88/18870	2.2789e-14	5.60006e-13	4.58955e-13	51203/332/24137/9212/55143/3925/55165/11113/9585/54443/26586/1894/9493/3619	14
120	Proli_T	GO:0000910	cytokinesis	18/161	188/18870	3.66191e-14	8.83865e-13	7.24375e-13	51203/332/9928/9055/24137/9212/55143/3925/55165/11113/9585/675/54443/26586/1894/9493/79733/3619	18
121	Proli_T	GO:0045132	meiotic chromosome segregation	14/161	91/18870	3.70261e-14	8.83865e-13	7.24375e-13	259266/10051/9232/10403/83540/10592/26271/84057/23397/7272/151648/83990/9133/2177	14
122	Proli_T	GO:0090231	regulation of spindle checkpoint	9/161	21/18870	5.14946e-14	1.17873e-12	9.66034e-13	57082/332/10403/891/9212/55143/3619/4085/55755	9
123	Proli_T	GO:0090266	regulation of mitotic cell cycle spindle assembly checkpoint	9/161	21/18870	5.14946e-14	1.17873e-12	9.66034e-13	57082/332/10403/891/9212/55143/3619/4085/55755	9
124	Proli_T	GO:1903504	regulation of mitotic spindle checkpoint	9/161	21/18870	5.14946e-14	1.17873e-12	9.66034e-13	57082/332/10403/891/9212/55143/3619/4085/55755	9
125	Proli_T	GO:0000086	G2/M transition of mitotic cell cycle	16/161	140/18870	6.36562e-14	1.43743e-12	1.17805e-12	1063/983/9928/891/9212/890/5885/26271/9833/6240/63967/995/672/1021/79621/2305	16
126	Proli_T	GO:0051231	spindle elongation	8/161	14/18870	6.77715e-14	1.50995e-12	1.23748e-12	332/9055/24137/9212/3832/55143/9493/3619	8
127	Proli_T	GO:0006310	DNA recombination	22/161	340/18870	1.55793e-13	3.4254e-12	2.8073e-12	3009/7153/3148/3006/3146/3008/3007/5885/3014/64710/84057/675/7468/10189/3838/79915/10635/83990/10721/3149/2177/672	22
128	Proli_T	GO:0006260	DNA replication	20/161	278/18870	2.99996e-13	6.5103e-12	5.33554e-12	6241/983/9768/890/157570/63901/26271/64710/1854/675/6240/10189/79915/79733/374393/3159/10721/6749/5983/672	20
129	Proli_T	GO:0090307	mitotic spindle assembly	12/161	71/18870	8.15546e-13	1.74715e-11	1.43188e-11	22974/332/9055/24137/9212/3832/55143/991/4605/9493/3833/3619	12
130	Proli_T	GO:0051256	mitotic spindle midzone assembly	7/161	11/18870	9.25757e-13	1.95815e-11	1.60481e-11	332/9055/24137/9212/55143/9493/3619	7
131	Proli_T	GO:1902749	regulation of cell cycle G2/M phase transition	14/161	116/18870	1.16874e-12	2.44122e-11	2.00071e-11	1063/983/9928/891/9212/5885/26271/6240/63967/79915/995/672/1021/79621	14
132	Proli_T	GO:0061640	cytoskeleton-dependent cytokinesis	14/161	117/18870	1.31793e-12	2.71884e-11	2.22823e-11	51203/332/24137/9212/55143/3925/55165/11113/9585/54443/26586/1894/9493/3619	14
133	Proli_T	GO:0007076	mitotic chromosome condensation	8/161	19/18870	1.64514e-12	3.35247e-11	2.74753e-11	51203/64151/10051/113130/10592/23310/23397/9918	8
134	Proli_T	GO:0000022	mitotic spindle elongation	7/161	12/18870	2.20595e-12	4.44113e-11	3.63975e-11	332/9055/24137/9212/55143/9493/3619	7
135	Proli_T	GO:0051315	attachment of mitotic spindle microtubules to kinetochore	8/161	21/18870	4.36561e-12	8.58227e-11	7.03363e-11	1062/332/10403/11004/9212/83540/55143/3619	8
136	Proli_T	GO:0051383	kinetochore organization	8/161	21/18870	4.36561e-12	8.58227e-11	7.03363e-11	1063/1062/9787/10051/10403/83540/10592/387103	8
137	Proli_T	GO:0060623	regulation of chromosome condensation	7/161	13/18870	4.74543e-12	9.22047e-11	7.55667e-11	64151/10051/10592/23310/54892/23397/9918	7
138	Proli_T	GO:0010389	regulation of G2/M transition of mitotic cell cycle	13/161	104/18870	4.87244e-12	9.35844e-11	7.66974e-11	1063/983/9928/891/9212/5885/26271/6240/63967/995/672/1021/79621	13
139	Proli_T	GO:0051255	spindle midzone assembly	7/161	14/18870	9.42308e-12	1.78931e-10	1.46644e-10	332/9055/24137/9212/55143/9493/3619	7
140	Proli_T	GO:0061982	meiosis I cell cycle process	14/161	136/18870	1.06007e-11	1.99032e-10	1.63117e-10	7153/9232/10403/5885/26271/84057/675/991/10635/1164/83990/9133/2177/995	14
141	Proli_T	GO:0051656	establishment of organelle localization	23/161	469/18870	1.30104e-11	2.4156e-10	1.97971e-10	1063/51203/57082/1062/332/9928/10403/891/11004/9212/83540/113130/57405/55143/1894/151648/3833/3619/4085/4001/4648/55755/3835	23
142	Proli_T	GO:0032465	regulation of cytokinesis	12/161	93/18870	2.25884e-11	4.14783e-10	3.39937e-10	332/9928/9055/9212/55143/11113/9585/675/1894/9493/79733/3619	12
143	Proli_T	GO:1901989	positive regulation of cell cycle phase transition	13/161	119/18870	2.7871e-11	5.06222e-10	4.14876e-10	6241/11065/9787/983/891/113130/26271/991/6240/2146/79915/6491/995	13
144	Proli_T	GO:1901970	positive regulation of mitotic sister chromatid separation	7/161	18/18870	8.49089e-11	1.52562e-09	1.25033e-09	11065/332/9787/9212/55143/991/3619	7
145	Proli_T	GO:0034728	nucleosome organization	13/161	138/18870	1.83231e-10	3.25722e-09	2.66946e-09	8364/3009/3148/3006/8351/3008/3007/8358/3014/10541/55723/3159/6749	13
146	Proli_T	GO:0032467	positive regulation of cytokinesis	9/161	47/18870	1.97587e-10	3.47545e-09	2.84832e-09	332/9928/9212/55143/11113/9585/1894/9493/3619	9
147	Proli_T	GO:0090232	positive regulation of spindle checkpoint	6/161	12/18870	3.1117e-10	5.36047e-09	4.39319e-09	332/10403/9212/55143/3619/4085	6
148	Proli_T	GO:0090267	positive regulation of mitotic cell cycle spindle assembly checkpoint	6/161	12/18870	3.1117e-10	5.36047e-09	4.39319e-09	332/10403/9212/55143/3619/4085	6
149	Proli_T	GO:0006334	nucleosome assembly	12/161	118/18870	3.85234e-10	6.56863e-09	5.38334e-09	8364/3009/3148/3006/8351/3008/3007/8358/3014/10541/55723/6749	12
150	Proli_T	GO:0051302	regulation of cell division	14/161	186/18870	7.12785e-10	1.20309e-08	9.86e-09	259266/332/9928/9055/9212/146909/55143/11113/9585/675/1894/9493/79733/3619	14
151	Proli_T	GO:1901992	positive regulation of mitotic cell cycle phase transition	11/161	98/18870	7.31338e-10	1.22207e-08	1.00155e-08	6241/11065/9787/983/891/113130/26271/991/6240/6491/995	11
152	Proli_T	GO:0045931	positive regulation of mitotic cell cycle	12/161	128/18870	9.9566e-10	1.64728e-08	1.35003e-08	6241/11065/9787/983/891/113130/26271/675/991/6240/6491/995	12
153	Proli_T	GO:0007127	meiosis I	12/161	129/18870	1.08977e-09	1.7853e-08	1.46315e-08	7153/9232/10403/5885/26271/84057/675/10635/1164/83990/9133/2177	12
154	Proli_T	GO:0007062	sister chromatid cohesion	9/161	59/18870	1.66982e-09	2.70899e-08	2.22017e-08	701/113130/157570/5885/699/991/151648/151246/3835	9
155	Proli_T	GO:2001252	positive regulation of chromosome organization	11/161	109/18870	2.31092e-09	3.71303e-08	3.04302e-08	64151/10051/983/9212/10592/5885/699/23310/54892/23397/9918	11
156	Proli_T	GO:0034508	centromere complex assembly	7/161	30/18870	4.9844e-09	7.93232e-08	6.50096e-08	1063/1062/9787/387103/401541/55355/55839	7
157	Proli_T	GO:0034502	protein localization to chromosome	11/161	119/18870	5.90175e-09	9.30361e-08	7.6248e-08	8364/3009/57082/983/9212/701/157570/5885/675/2146/7272	11
158	Proli_T	GO:1901978	positive regulation of cell cycle checkpoint	6/161	18/18870	5.99234e-09	9.35813e-08	7.66949e-08	332/10403/9212/55143/3619/4085	6
159	Proli_T	GO:0006261	DNA-templated DNA replication	12/161	161/18870	1.37116e-08	2.12149e-07	1.73867e-07	63901/26271/64710/675/6240/10189/79915/79733/3159/10721/5983/672	12
160	Proli_T	GO:0051988	regulation of attachment of spindle microtubules to kinetochore	6/161	21/18870	1.71491e-08	2.629e-07	2.1546e-07	332/891/9212/55143/1894/3619	6
161	Proli_T	GO:0051987	positive regulation of attachment of spindle microtubules to kinetochore	5/161	11/18870	1.88322e-08	2.83501e-07	2.32344e-07	332/891/9212/55143/3619	5
162	Proli_T	GO:1902412	regulation of mitotic cytokinesis	5/161	11/18870	1.88322e-08	2.83501e-07	2.32344e-07	332/9212/55143/9585/3619	5
163	Proli_T	GO:0007098	centrosome cycle	11/161	138/18870	2.80249e-08	4.18121e-07	3.42673e-07	983/10403/9768/3832/675/151648/22995/55755/9793/6491/672	11
164	Proli_T	GO:0044771	meiotic cell cycle phase transition	5/161	13/18870	5.17413e-08	7.6513e-07	6.27065e-07	10403/991/7272/9133/995	5
165	Proli_T	GO:0006302	double-strand break repair	15/161	307/18870	6.15574e-08	9.02302e-07	7.39484e-07	3148/3146/113130/157570/5885/3014/64710/675/7468/10635/83990/10721/2177/672/2305	15
166	Proli_T	GO:0070192	chromosome organization involved in meiotic cell cycle	8/161	65/18870	7.87963e-08	1.14494e-06	9.38343e-07	10051/10592/84057/23310/23397/83990/2177/9918	8
167	Proli_T	GO:0031023	microtubule organizing center organization	11/161	154/18870	8.70355e-08	1.25376e-06	1.02752e-06	983/10403/9768/3832/675/151648/22995/55755/9793/6491/672	11
168	Proli_T	GO:0051781	positive regulation of cell division	9/161	94/18870	1.09612e-07	1.56548e-06	1.283e-06	332/9928/9212/55143/11113/9585/1894/9493/3619	9
169	Proli_T	GO:0035825	homologous recombination	8/161	68/18870	1.12927e-07	1.59917e-06	1.3106e-06	7153/5885/64710/84057/10635/83990/2177/672	8
170	Proli_T	GO:0007064	mitotic sister chromatid cohesion	6/161	31/18870	2.1684e-07	3.04487e-06	2.49543e-06	113130/157570/5885/699/991/151648	6
171	Proli_T	GO:0000018	regulation of DNA recombination	10/161	136/18870	2.61118e-07	3.63606e-06	2.97995e-06	3009/3006/3008/3007/7468/10189/3838/79915/10635/10721	10
172	Proli_T	GO:1902751	positive regulation of cell cycle G2/M phase transition	6/161	32/18870	2.65005e-07	3.6597e-06	2.99932e-06	983/891/26271/6240/79915/995	6
173	Proli_T	GO:1904666	regulation of ubiquitin protein ligase activity	5/161	18/18870	3.32771e-07	4.55787e-06	3.73542e-06	11065/27338/26271/991/4085	5
174	Proli_T	GO:0032392	DNA geometric change	8/161	85/18870	6.50354e-07	8.8353e-06	7.241e-06	7153/3148/3146/83990/3159/10721/3149/5983	8
175	Proli_T	GO:0042770	signal transduction in response to DNA damage	11/161	189/18870	6.86938e-07	9.25704e-06	7.58664e-06	51512/983/3014/675/63967/79915/83990/2177/672/79621/2305	11
176	Proli_T	GO:0007143	female meiotic nuclear division	6/161	38/18870	7.73907e-07	1.03456e-05	8.47876e-06	7153/10403/26271/23397/7272/9133	6
177	Proli_T	GO:0031055	chromatin remodeling at centromere	4/161	10/18870	1.03009e-06	1.35534e-05	1.11077e-05	387103/401541/55355/55839	4
178	Proli_T	GO:0034080	CENP-A containing chromatin assembly	4/161	10/18870	1.03009e-06	1.35534e-05	1.11077e-05	387103/401541/55355/55839	4
179	Proli_T	GO:0071459	protein localization to chromosome, centromeric region	6/161	40/18870	1.06097e-06	1.38506e-05	1.13513e-05	8364/57082/983/9212/701/7272	6
180	Proli_T	GO:0071103	DNA conformation change	8/161	92/18870	1.196e-06	1.54923e-05	1.26968e-05	7153/3148/3146/83990/3159/10721/3149/5983	8
181	Proli_T	GO:0000077	DNA damage checkpoint signaling	9/161	126/18870	1.34522e-06	1.72913e-05	1.41711e-05	51512/983/3014/675/63967/83990/2177/672/79621	9
182	Proli_T	GO:0051054	positive regulation of DNA metabolic process	13/161	298/18870	1.73094e-06	2.20794e-05	1.80952e-05	3146/983/9212/890/3014/7468/79915/10635/79733/7398/5983/672/2305	13
183	Proli_T	GO:0007019	microtubule depolymerization	6/161	45/18870	2.1735e-06	2.75145e-05	2.25496e-05	22974/11004/146909/3925/26586/9793	6
184	Proli_T	GO:0031109	microtubule polymerization or depolymerization	9/161	134/18870	2.24883e-06	2.8254e-05	2.31557e-05	22974/11004/146909/3925/26271/26586/221150/55755/9793	9
185	Proli_T	GO:0031570	DNA integrity checkpoint signaling	9/161	135/18870	2.39205e-06	2.96558e-05	2.43045e-05	51512/983/3014/675/63967/83990/2177/672/79621	9
186	Proli_T	GO:0090306	meiotic spindle assembly	4/161	12/18870	2.39589e-06	2.96558e-05	2.43045e-05	259266/10403/26271/9133	4
187	Proli_T	GO:0090235	regulation of metaphase plate congression	4/161	13/18870	3.43774e-06	4.22387e-05	3.46168e-05	332/9212/55143/3619	4
188	Proli_T	GO:0051298	centrosome duplication	7/161	75/18870	3.52323e-06	4.29731e-05	3.52188e-05	10403/675/22995/55755/9793/6491/672	7
189	Proli_T	GO:0048144	fibroblast proliferation	8/161	107/18870	3.75916e-06	4.55185e-05	3.73048e-05	983/891/890/1163/1164/79733/1021/79621	8
190	Proli_T	GO:0010971	positive regulation of G2/M transition of mitotic cell cycle	5/161	29/18870	4.2754e-06	5.13971e-05	4.21226e-05	983/891/26271/6240/995	5
191	Proli_T	GO:0051177	meiotic sister chromatid cohesion	4/161	14/18870	4.78086e-06	5.7063e-05	4.67661e-05	701/5885/699/151246	4
192	Proli_T	GO:0009263	deoxyribonucleotide biosynthetic process	4/161	15/18870	6.47605e-06	7.46309e-05	6.1164e-05	6241/7298/1854/6240	4
193	Proli_T	GO:0009265	2'-deoxyribonucleotide biosynthetic process	4/161	15/18870	6.47605e-06	7.46309e-05	6.1164e-05	6241/7298/1854/6240	4
194	Proli_T	GO:0034501	protein localization to kinetochore	4/161	15/18870	6.47605e-06	7.46309e-05	6.1164e-05	57082/983/9212/7272	4
195	Proli_T	GO:0046385	deoxyribose phosphate biosynthetic process	4/161	15/18870	6.47605e-06	7.46309e-05	6.1164e-05	6241/7298/1854/6240	4
196	Proli_T	GO:1903083	protein localization to condensed chromosome	4/161	15/18870	6.47605e-06	7.46309e-05	6.1164e-05	57082/983/9212/7272	4
197	Proli_T	GO:0051382	kinetochore assembly	4/161	17/18870	1.11421e-05	0.000127524	0.000104513	1063/1062/9787/387103	4
198	Proli_T	GO:0006275	regulation of DNA replication	8/161	124/18870	1.12344e-05	0.000127705	0.000104661	983/890/157570/26271/64710/79915/79733/5983	8
199	Proli_T	GO:0007131	reciprocal meiotic recombination	6/161	60/18870	1.20219e-05	0.000134823	0.000110495	7153/5885/84057/10635/83990/2177	6
200	Proli_T	GO:0140527	reciprocal homologous recombination	6/161	60/18870	1.20219e-05	0.000134823	0.000110495	7153/5885/84057/10635/83990/2177	6
201	Proli_T	GO:0000212	meiotic spindle organization	4/161	19/18870	1.79057e-05	0.00019947	0.000163476	259266/10403/26271/9133	4
202	Proli_T	GO:0051438	regulation of ubiquitin-protein transferase activity	5/161	39/18870	1.93494e-05	0.000214125	0.000175487	11065/27338/26271/991/4085	5
203	Proli_T	GO:0051445	regulation of meiotic cell cycle	6/161	66/18870	2.09176e-05	0.000229956	0.000188461	259266/26271/991/7272/10635/995	6
204	Proli_T	GO:0036297	interstrand cross-link repair	5/161	40/18870	2.19621e-05	0.00023986	0.000196578	55215/55247/64710/10635/2177	5
205	Proli_T	GO:0010212	response to ionizing radiation	8/161	138/18870	2.44812e-05	0.000265637	0.000217704	3014/64710/675/6240/1894/10635/2177/672	8
206	Proli_T	GO:0071479	cellular response to ionizing radiation	6/161	70/18870	2.93498e-05	0.000316409	0.000259314	3014/64710/675/1894/10635/672	6
207	Proli_T	GO:0032506	cytokinetic process	5/161	43/18870	3.14723e-05	0.000337117	0.000276286	9212/55165/9585/54443/1894	5
208	Proli_T	GO:0071897	DNA biosynthetic process	9/161	194/18870	4.43568e-05	0.000472104	0.000386914	1063/7298/9212/9768/890/6240/10721/7398/5983	9
209	Proli_T	GO:0031297	replication fork processing	5/161	49/18870	5.98283e-05	0.000632741	0.000518565	63901/64710/675/10189/672	5
210	Proli_T	GO:0000082	G1/S transition of mitotic cell cycle	10/161	252/18870	6.27227e-05	0.00065918	0.000540234	6241/51512/983/9928/890/6240/2146/1033/6491/1021	10
211	Proli_T	GO:0045910	negative regulation of DNA recombination	5/161	50/18870	6.6021e-05	0.000688001	0.000563854	3009/3006/3008/3007/10721	5
212	Proli_T	GO:0007018	microtubule-based movement	13/161	420/18870	6.62885e-05	0.000688001	0.000563854	1062/56992/9787/9928/24137/11004/146909/3832/9585/9493/3833/89891/3835	13
213	Proli_T	GO:0070507	regulation of microtubule cytoskeleton organization	8/161	161/18870	7.33989e-05	0.000757096	0.00062048	22974/3925/10460/26586/221150/55755/9793/6491	8
214	Proli_T	GO:0007292	female gamete generation	8/161	163/18870	8.00398e-05	0.00082053	0.000672468	7153/259266/10403/26271/675/23397/7272/9133	8
215	Proli_T	GO:0070601	centromeric sister chromatid cohesion	3/161	11/18870	9.56575e-05	0.000968749	0.000793942	701/699/151648	3
216	Proli_T	GO:0085020	protein K6-linked ubiquitination	3/161	11/18870	9.56575e-05	0.000968749	0.000793942	27338/29089/672	3
217	Proli_T	GO:0045005	DNA-templated DNA replication maintenance of fidelity	5/161	56/18870	0.000114225	0.00114982	0.000942339	63901/64710/675/10189/672	5
218	Proli_T	GO:0044843	cell cycle G1/S phase transition	10/161	279/18870	0.000145211	0.00145298	0.0011908	6241/51512/983/9928/890/6240/2146/1033/6491/1021	10
219	Proli_T	GO:0071168	protein localization to chromatin	5/161	59/18870	0.000146659	0.00145874	0.00119551	8364/3009/157570/5885/2146	5
220	Proli_T	GO:0010458	exit from mitosis	4/161	32/18870	0.000152372	0.00150659	0.00123473	11065/27338/113130/54443	4
221	Proli_T	GO:0051785	positive regulation of nuclear division	5/161	60/18870	0.000158899	0.00156189	0.00128005	51203/11065/9787/991/10635	5
222	Proli_T	GO:0031110	regulation of microtubule polymerization or depolymerization	6/161	95/18870	0.000163279	0.00159072	0.00130368	22974/3925/26586/221150/55755/9793	6
223	Proli_T	GO:0007144	female meiosis I	3/161	13/18870	0.000163737	0.00159072	0.00130368	10403/26271/9133	3
224	Proli_T	GO:0071478	cellular response to radiation	8/161	181/18870	0.000165504	0.0015986	0.00131014	9212/3014/64710/675/55872/1894/10635/672	8
225	Proli_T	GO:0051653	spindle localization	5/161	62/18870	0.000185707	0.00178343	0.00146161	51203/259266/10403/4085/55755	5
226	Proli_T	GO:0045842	positive regulation of mitotic metaphase/anaphase transition	3/161	14/18870	0.000207088	0.0019774	0.00162058	11065/9787/991	3
227	Proli_T	GO:1902101	positive regulation of metaphase/anaphase transition of cell cycle	3/161	15/18870	0.000257241	0.00244233	0.00200162	11065/9787/991	3
228	Proli_T	GO:0010972	negative regulation of G2/M transition of mitotic cell cycle	5/161	67/18870	0.000267829	0.00252848	0.00207223	983/9212/5885/63967/672	5
229	Proli_T	GO:0046653	tetrahydrofolate metabolic process	3/161	16/18870	0.000314625	0.00294664	0.00241493	7298/1719/10797	3
230	Proli_T	GO:0009314	response to radiation	12/161	428/18870	0.000315649	0.00294664	0.00241493	9212/9768/3014/64710/675/6240/55872/1894/10635/7398/2177/672	12
231	Proli_T	GO:1902750	negative regulation of cell cycle G2/M phase transition	5/161	70/18870	0.000328823	0.00305258	0.00250175	983/9212/5885/63967/672	5
232	Proli_T	GO:0000731	DNA synthesis involved in DNA repair	4/161	40/18870	0.000367244	0.00337179	0.00276336	9768/6240/7398/5983	4
233	Proli_T	GO:0040001	establishment of mitotic spindle localization	4/161	40/18870	0.000367244	0.00337179	0.00276336	51203/10403/4085/55755	4
234	Proli_T	GO:0051782	negative regulation of cell division	3/161	17/18870	0.000379658	0.00346178	0.00283712	259266/9212/79733	3
235	Proli_T	GO:0032886	regulation of microtubule-based process	9/161	258/18870	0.00038119	0.00346178	0.00283712	22974/3925/10460/26586/221150/55755/9793/6491/672	9
236	Proli_T	GO:0009394	2'-deoxyribonucleotide metabolic process	4/161	42/18870	0.000443867	0.0040092	0.00328575	6241/7298/1854/6240	4
237	Proli_T	GO:0007096	regulation of exit from mitosis	3/161	18/18870	0.000452743	0.00406738	0.00333344	11065/113130/54443	3
238	Proli_T	GO:0051261	protein depolymerization	6/161	115/18870	0.000459658	0.00410743	0.00336626	22974/11004/146909/3925/26586/9793	6
239	Proli_T	GO:0007099	centriole replication	4/161	43/18870	0.000486164	0.00427568	0.00350415	22995/55755/6491/672	4
240	Proli_T	GO:0009262	deoxyribonucleotide metabolic process	4/161	43/18870	0.000486164	0.00427568	0.00350415	6241/7298/1854/6240	4
241	Proli_T	GO:0019692	deoxyribose phosphate metabolic process	4/161	43/18870	0.000486164	0.00427568	0.00350415	6241/7298/1854/6240	4
242	Proli_T	GO:0006282	regulation of DNA repair	8/161	215/18870	0.000527323	0.00459961	0.00376963	3146/3014/7468/10635/10721/7398/672/2305	8
243	Proli_T	GO:0044786	cell cycle DNA replication	4/161	44/18870	0.000531254	0.00459961	0.00376963	26271/675/79915/79733	4
244	Proli_T	GO:0045840	positive regulation of mitotic nuclear division	4/161	44/18870	0.000531254	0.00459961	0.00376963	51203/11065/9787/991	4
245	Proli_T	GO:0002200	somatic diversification of immune receptors	5/161	78/18870	0.000543032	0.00467735	0.00383334	3148/3146/7468/79915/10721	5
246	Proli_T	GO:0032508	DNA duplex unwinding	5/161	79/18870	0.000575777	0.00493396	0.00404365	7153/83990/3159/10721/5983	5
247	Proli_T	GO:0000079	regulation of cyclin-dependent protein serine/threonine kinase activity	5/161	82/18870	0.000682936	0.00582238	0.00477175	891/890/1033/9133/995	5
248	Proli_T	GO:0044773	mitotic DNA damage checkpoint signaling	5/161	83/18870	0.00072177	0.00612222	0.00501749	51512/983/63967/2177/672	5
249	Proli_T	GO:0098534	centriole assembly	4/161	48/18870	0.000741603	0.00625868	0.00512932	22995/55755/6491/672	4
250	Proli_T	GO:0000724	double-strand break repair via homologous recombination	7/161	175/18870	0.000770531	0.00647014	0.00530262	5885/3014/64710/675/10635/10721/672	7
251	Proli_T	GO:1904029	regulation of cyclin-dependent protein kinase activity	5/161	85/18870	0.000804363	0.00672045	0.00550777	891/890/1033/9133/995	5
252	Proli_T	GO:0051443	positive regulation of ubiquitin-protein transferase activity	3/161	22/18870	0.00083331	0.00692767	0.00567759	11065/27338/991	3
253	Proli_T	GO:0051347	positive regulation of transferase activity	11/161	414/18870	0.00087308	0.00720701	0.00590653	22974/1062/11065/27338/9928/9212/991/63967/2146/1894/5983	11
254	Proli_T	GO:0045739	positive regulation of DNA repair	6/161	130/18870	0.00087745	0.00720701	0.00590653	3146/3014/10635/7398/672/2305	6
255	Proli_T	GO:0000725	recombinational repair	7/161	179/18870	0.000879851	0.00720701	0.00590653	5885/3014/64710/675/10635/10721/672	7
256	Proli_T	GO:0044774	mitotic DNA integrity checkpoint signaling	5/161	87/18870	0.00089381	0.00728564	0.00597097	51512/983/63967/2177/672	5
257	Proli_T	GO:0046599	regulation of centriole replication	3/161	23/18870	0.000952332	0.00772498	0.00633104	55755/6491/672	3
258	Proli_T	GO:0048146	positive regulation of fibroblast proliferation	4/161	53/18870	0.00107979	0.00864759	0.00708716	891/890/1021/79621	4
259	Proli_T	GO:0031145	anaphase-promoting complex-dependent catabolic process	3/161	24/18870	0.0010816	0.00864759	0.00708716	11065/27338/991	3
260	Proli_T	GO:2000001	regulation of DNA damage checkpoint	3/161	24/18870	0.0010816	0.00864759	0.00708716	675/672/79621	3
261	Proli_T	GO:0032984	protein-containing complex disassembly	8/161	245/18870	0.00123005	0.00978766	0.00802151	22974/11004/146909/3925/26586/3159/6749/9793	8
262	Proli_T	GO:0046785	microtubule polymerization	5/161	94/18870	0.00126593	0.0100255	0.00821641	22974/3925/26271/55755/9793	5
263	Proli_T	GO:0006760	folic acid-containing compound metabolic process	3/161	26/18870	0.00137215	0.0108154	0.00886377	7298/1719/10797	3
264	Proli_T	GO:0051293	establishment of spindle localization	4/161	57/18870	0.00141867	0.0111296	0.00912129	51203/10403/4085/55755	4
265	Proli_T	GO:0051053	negative regulation of DNA metabolic process	6/161	146/18870	0.00159577	0.0124604	0.010212	3009/3006/3008/3007/26271/10721	6
266	Proli_T	GO:0031396	regulation of protein ubiquitination	7/161	200/18870	0.00167008	0.01298	0.0106378	11065/27338/55215/26271/991/4085/672	7
267	Proli_T	GO:0070979	protein K11-linked ubiquitination	3/161	30/18870	0.00208984	0.0161672	0.0132499	11065/27338/29089	3
268	Proli_T	GO:0031100	animal organ regeneration	4/161	64/18870	0.00217912	0.0167802	0.0137523	7298/983/890/2146	4
269	Proli_T	GO:0006303	double-strand break repair via nonhomologous end joining	4/161	65/18870	0.00230678	0.0175211	0.0143595	3148/3146/7468/10721	4
270	Proli_T	GO:0045143	homologous chromosome segregation	4/161	65/18870	0.00230678	0.0175211	0.0143595	9232/84057/83990/2177	4
271	Proli_T	GO:1902808	positive regulation of cell cycle G1/S phase transition	4/161	65/18870	0.00230678	0.0175211	0.0143595	6241/6240/2146/6491	4
272	Proli_T	GO:0022412	cellular process involved in reproduction in multicellular organism	11/161	471/18870	0.00242462	0.0183328	0.0150247	7153/3148/259266/57082/10403/26271/675/23397/7272/83990/9133	11
273	Proli_T	GO:0042558	pteridine-containing compound metabolic process	3/161	32/18870	0.00252147	0.0187182	0.0153406	7298/1719/10797	3
274	Proli_T	GO:0051642	centrosome localization	3/161	32/18870	0.00252147	0.0187182	0.0153406	259266/9787/4085	3
275	Proli_T	GO:0061842	microtubule organizing center localization	3/161	32/18870	0.00252147	0.0187182	0.0153406	259266/9787/4085	3
276	Proli_T	GO:0031398	positive regulation of protein ubiquitination	5/161	110/18870	0.00253161	0.0187182	0.0153406	11065/27338/55215/991/672	5
277	Proli_T	GO:0090398	cellular senescence	5/161	110/18870	0.00253161	0.0187182	0.0153406	26271/3014/675/3159/1021	5
278	Proli_T	GO:0021591	ventricular system development	3/161	33/18870	0.00275639	0.0202015	0.0165562	1063/10541/1021	3
279	Proli_T	GO:0040020	regulation of meiotic nuclear division	3/161	33/18870	0.00275639	0.0202015	0.0165562	26271/991/10635	3
280	Proli_T	GO:2000573	positive regulation of DNA biosynthetic process	4/161	69/18870	0.00286903	0.0209352	0.0171575	9212/890/7398/5983	4
281	Proli_T	GO:0006301	postreplication repair	3/161	34/18870	0.00300437	0.0218274	0.0178887	9768/7398/672	3
282	Proli_T	GO:0044837	actomyosin contractile ring organization	2/161	10/18870	0.0031125	0.0224181	0.0183728	54443/1894	2
283	Proli_T	GO:1901993	regulation of meiotic cell cycle phase transition	2/161	10/18870	0.0031125	0.0224181	0.0183728	7272/995	2
284	Proli_T	GO:0051258	protein polymerization	8/161	286/18870	0.00322077	0.0230983	0.0189303	22974/11065/27338/81624/3925/26271/55755/9793	8
285	Proli_T	GO:0000132	establishment of mitotic spindle orientation	3/161	35/18870	0.00326564	0.0233201	0.019112	10403/4085/55755	3
286	Proli_T	GO:0002562	somatic diversification of immune receptors via germline recombination within a single locus	4/161	72/18870	0.00334764	0.023703	0.0194259	3148/3146/7468/79915	4
287	Proli_T	GO:0016444	somatic cell DNA recombination	4/161	72/18870	0.00334764	0.023703	0.0194259	3148/3146/7468/79915	4
288	Proli_T	GO:0040029	epigenetic regulation of gene expression	7/161	229/18870	0.00356116	0.0251084	0.0205777	3146/8351/8358/2146/4001/672/55617	7
289	Proli_T	GO:1990918	double-strand break repair involved in meiotic recombination	2/161	11/18870	0.00378291	0.0265599	0.0217672	83990/2177	2
290	Proli_T	GO:0007095	mitotic G2 DNA damage checkpoint signaling	3/161	37/18870	0.00382893	0.0267705	0.0219398	983/63967/672	3
291	Proli_T	GO:0072331	signal transduction by p53 class mediator	6/161	175/18870	0.0039381	0.027419	0.0224713	51512/9212/51741/675/79915/2305	6
292	Proli_T	GO:0031111	negative regulation of microtubule polymerization or depolymerization	3/161	38/18870	0.00413136	0.0285269	0.0233793	22974/3925/26586	3
293	Proli_T	GO:0045740	positive regulation of DNA replication	3/161	38/18870	0.00413136	0.0285269	0.0233793	983/79915/79733	3
294	Proli_T	GO:0009176	pyrimidine deoxyribonucleoside monophosphate metabolic process	2/161	12/18870	0.00451415	0.0307883	0.0252327	7298/1854	2
295	Proli_T	GO:0010826	negative regulation of centrosome duplication	2/161	12/18870	0.00451415	0.0307883	0.0252327	55755/672	2
296	Proli_T	GO:0046606	negative regulation of centrosome cycle	2/161	12/18870	0.00451415	0.0307883	0.0252327	55755/672	2
297	Proli_T	GO:0006730	one-carbon metabolic process	3/161	40/18870	0.00477878	0.0324607	0.0266033	7298/1719/10797	3
298	Proli_T	GO:2000045	regulation of G1/S transition of mitotic cell cycle	6/161	183/18870	0.00489092	0.033088	0.0271174	6241/51512/9928/6240/2146/6491	6
299	Proli_T	GO:1903320	regulation of protein modification by small protein conjugation or removal	7/161	243/18870	0.00491605	0.0331239	0.0271468	11065/27338/55215/26271/991/4085/672	7
300	Proli_T	GO:0010992	ubiquitin recycling	2/161	13/18870	0.00530513	0.0356019	0.0291776	11065/27338	2
301	Proli_T	GO:0032200	telomere organization	6/161	187/18870	0.0054263	0.0362694	0.0297247	8364/8351/9212/8358/675/2146	6
302	Proli_T	GO:0051294	establishment of spindle orientation	3/161	42/18870	0.00548415	0.0363652	0.0298032	10403/4085/55755	3
303	Proli_T	GO:0060236	regulation of mitotic spindle organization	3/161	42/18870	0.00548415	0.0363652	0.0298032	22974/10460/6491	3
304	Proli_T	GO:1903322	positive regulation of protein modification by small protein conjugation or removal	5/161	132/18870	0.0055119	0.0364047	0.0298356	11065/27338/55215/991/672	5
305	Proli_T	GO:0021543	pallium development	6/161	191/18870	0.00600343	0.039495	0.0323682	259266/9928/3014/10460/2146/1021	6
306	Proli_T	GO:0001833	inner cell mass cell proliferation	2/161	14/18870	0.0061548	0.0403321	0.0330543	675/54892	2
307	Proli_T	GO:0001701	in utero embryonic development	9/161	392/18870	0.0065985	0.0430706	0.0352987	6241/891/675/54892/79733/55723/9133/6491/79621	9
308	Proli_T	GO:0032147	activation of protein kinase activity	4/161	88/18870	0.00683271	0.0444259	0.0364094	22974/9928/63967/1894	4
309	Proli_T	GO:0046655	folic acid metabolic process	2/161	15/18870	0.00706212	0.0452902	0.0371178	1719/10797	2
310	Proli_T	GO:0051290	protein heterotetramerization	2/161	15/18870	0.00706212	0.0452902	0.0371178	6241/6240	2
311	Proli_T	GO:0051444	negative regulation of ubiquitin-protein transferase activity	2/161	15/18870	0.00706212	0.0452902	0.0371178	26271/4085	2
312	Proli_T	GO:0090224	regulation of spindle organization	3/161	46/18870	0.00707406	0.0452902	0.0371178	22974/10460/6491	3
313	Proli_T	GO:0048145	regulation of fibroblast proliferation	4/161	89/18870	0.00710764	0.0453316	0.0371516	891/890/1021/79621	4
314	Proli_T	GO:0002520	immune system development	6/161	199/18870	0.00729017	0.0463189	0.0379608	3148/3146/7468/79915/9133/10721	6
315	Proli_T	GO:0010824	regulation of centrosome duplication	3/161	47/18870	0.00750972	0.0473538	0.0388089	55755/6491/672	3
316	Proli_T	GO:0090329	regulation of DNA-templated DNA replication	3/161	47/18870	0.00750972	0.0473538	0.0388089	26271/79733/5983	3
317	Proli_T	GO:1903900	regulation of viral life cycle	5/161	143/18870	0.00768123	0.0482531	0.039546	7153/3146/63901/3838/8815	5
318	Proli_T	GO:0006206	pyrimidine nucleobase metabolic process	2/161	16/18870	0.00802605	0.0495832	0.040636	7298/6240	2
319	Proli_T	GO:0006266	DNA ligation	2/161	16/18870	0.00802605	0.0495832	0.040636	7153/3146	2
320	Proli_T	GO:0009130	pyrimidine nucleoside monophosphate biosynthetic process	2/161	16/18870	0.00802605	0.0495832	0.040636	7298/1854	2
321	Proli_T	GO:0071214	cellular response to abiotic stimulus	8/161	334/18870	0.00804131	0.0495832	0.040636	9212/3014/64710/675/55872/1894/10635/672	8
322	Proli_T	GO:0104004	cellular response to environmental stimulus	8/161	334/18870	0.00804131	0.0495832	0.040636	9212/3014/64710/675/55872/1894/10635/672	8
323	Mac_T	GO:0002504	antigen processing and presentation of peptide or polysaccharide antigen via MHC class II	21/459	37/18870	7.30926e-25	3.23215e-21	2.10045e-21	1520/10437/972/3122/3123/1509/2207/3113/3115/3109/5641/3108/3117/3119/1514/54209/29108/567/81622/55016/55207	21
324	Mac_T	GO:0002495	antigen processing and presentation of peptide antigen via MHC class II	20/459	35/18870	8.09671e-24	1.79018e-20	1.16337e-20	1520/10437/972/3122/3123/1509/2207/3113/3115/3109/5641/3108/3117/3119/1514/54209/29108/567/81622/55016	20
325	Mac_T	GO:0002478	antigen processing and presentation of exogenous peptide antigen	20/459	40/18870	3.07179e-22	4.52782e-19	2.94245e-19	1520/10437/972/3122/3123/1509/2207/3113/3115/3109/5641/3108/3117/3119/1514/3105/3133/567/2209/81622	20
326	Mac_T	GO:0019882	antigen processing and presentation	29/459	116/18870	1.69272e-21	1.58099e-18	1.02742e-18	1520/10437/972/3122/3123/1509/2207/968/3113/1512/3115/3109/5641/3108/3117/3119/1514/3383/3105/10981/3106/3133/54209/29108/567/2209/81622/55016/55207	29
327	Mac_T	GO:0048002	antigen processing and presentation of peptide antigen	24/459	71/18870	1.8723e-21	1.58099e-18	1.02742e-18	1520/10437/972/3122/3123/1509/2207/3113/3115/3109/5641/3108/3117/3119/1514/3105/3106/3133/54209/29108/567/2209/81622/55016	24
328	Mac_T	GO:0002697	regulation of immune effector process	49/459	389/18870	2.14517e-21	1.58099e-18	1.02742e-18	3958/972/7305/3122/3123/54/2896/3109/9516/948/4067/3689/3553/3383/6688/3726/3105/5027/3106/3916/8673/11006/966/3133/54209/7133/3606/8764/6850/2/8832/5795/64332/975/29108/7805/144811/8767/7099/64581/942/567/9846/11213/8417/2209/56833/7009/2268	49
329	Mac_T	GO:0071216	cellular response to biotic stimulus	40/459	265/18870	1.64742e-20	1.0407e-17	6.76308e-18	6347/968/3576/4792/706/929/9516/948/2920/2921/7431/4067/4318/3553/7538/6688/23643/3055/4790/9450/140885/19/8564/7097/54209/7133/4208/4360/6850/3394/64332/29108/23328/8767/7099/4853/64581/942/11213/2919	40
330	Mac_T	GO:0019884	antigen processing and presentation of exogenous antigen	20/459	49/18870	5.14958e-20	2.59642e-17	1.68731e-17	1520/10437/972/3122/3123/1509/2207/3113/3115/3109/5641/3108/3117/3119/1514/3105/3133/567/2209/81622	20
331	Mac_T	GO:0019886	antigen processing and presentation of exogenous peptide antigen via MHC class II	17/459	31/18870	5.28443e-20	2.59642e-17	1.68731e-17	1520/10437/972/3122/3123/1509/2207/3113/3115/3109/5641/3108/3117/3119/1514/567/81622	17
332	Mac_T	GO:0002237	response to molecule of bacterial origin	46/459	369/18870	5.94304e-20	2.62801e-17	1.70784e-17	54/6347/968/3576/4792/706/929/6648/9516/948/2920/2921/7431/4067/728/2353/4318/3553/1051/7538/6688/23643/3055/5027/4790/9450/140885/19/8564/7097/54209/7133/4208/4360/3394/64332/29108/6280/23328/8767/7099/942/567/6622/11213/2919	46
333	Mac_T	GO:0071219	cellular response to molecule of bacterial origin	37/459	239/18870	1.96869e-19	7.91412e-17	5.14308e-17	6347/968/3576/4792/706/929/9516/948/2920/2921/7431/4067/4318/3553/7538/6688/23643/3055/4790/9450/140885/19/8564/7097/54209/7133/4208/4360/3394/64332/29108/23328/8767/7099/942/11213/2919	37
334	Mac_T	GO:0032496	response to lipopolysaccharide	44/459	348/18870	2.29149e-19	7.94882e-17	5.16563e-17	54/6347/968/3576/4792/706/929/6648/9516/948/2920/2921/7431/4067/2353/4318/3553/1051/7538/6688/23643/3055/5027/4790/9450/140885/19/8564/7097/54209/7133/4208/4360/3394/64332/29108/6280/23328/8767/7099/942/6622/11213/2919	44
335	Mac_T	GO:0071222	cellular response to lipopolysaccharide	36/459	226/18870	2.33683e-19	7.94882e-17	5.16563e-17	6347/968/3576/4792/706/929/9516/948/2920/2921/7431/4067/4318/3553/7538/6688/23643/3055/4790/9450/140885/19/8564/7097/7133/4208/4360/3394/64332/29108/23328/8767/7099/942/11213/2919	36
336	Mac_T	GO:0001819	positive regulation of cytokine production	52/459	499/18870	6.22349e-19	1.96573e-16	1.27745e-16	972/7305/6348/2207/3113/3115/929/1536/54502/948/5144/728/9308/3553/1051/23643/3105/5027/1535/3133/7097/54209/3091/3606/10010/8764/6850/3394/1958/10159/8832/5795/975/29108/7805/144811/8767/7099/3162/64581/4023/719/920/3459/942/567/11213/81622/965/2268/1116/28984	52
337	Mac_T	GO:0050867	positive regulation of cell activation	45/459	396/18870	5.97875e-18	1.76253e-15	1.1454e-15	972/7305/3122/3123/6347/6348/3956/3113/3115/5341/3109/3108/3117/3119/4067/9308/3689/3553/6688/3105/3916/8673/140885/11006/3133/1075/54209/3606/4208/8764/6850/64332/975/29108/8767/7099/64581/920/942/567/9846/10673/81704/1880/2268	45
338	Mac_T	GO:0002696	positive regulation of leukocyte activation	44/459	380/18870	6.95944e-18	1.92342e-15	1.24995e-15	972/7305/3122/3123/6347/6348/3956/3113/3115/3109/3108/3117/3119/4067/9308/3689/3553/6688/3105/3916/8673/140885/11006/3133/1075/54209/3606/4208/8764/6850/64332/975/29108/8767/7099/64581/920/942/567/9846/10673/81704/1880/2268	44
339	Mac_T	GO:0050727	regulation of inflammatory response	46/459	425/18870	1.71863e-17	4.47046e-15	2.90518e-15	3123/348/54/6348/3956/2896/4792/8870/26471/7941/4067/11343/4318/2876/3553/1051/7538/3055/4790/283131/4814/8673/118788/140885/5468/3133/1075/7097/54209/7133/3606/284207/6850/64332/975/29108/6280/144811/7099/4023/6622/26090/313/2209/56833/2268	46
340	Mac_T	GO:0006909	phagocytosis	34/459	237/18870	6.68346e-17	1.6419e-14	1.06701e-14	7305/6347/2207/4481/929/948/4067/3689/4688/3553/3055/5027/1535/4035/140885/19/11031/7097/54209/6850/3394/2934/8685/5795/29108/55647/7099/64581/9936/2209/4689/2268/7879/55207	34
341	Mac_T	GO:0002699	positive regulation of immune effector process	36/459	270/18870	8.77445e-17	2.04214e-14	1.32711e-14	972/7305/3122/3123/3109/948/4067/3689/3553/6688/3105/5027/3106/3916/8673/3133/54209/3606/8764/6850/8832/5795/64332/975/29108/7805/144811/8767/7099/64581/942/567/9846/8417/2209/2268	36
342	Mac_T	GO:0097529	myeloid leukocyte migration	34/459	242/18870	1.28323e-16	2.83722e-14	1.8438e-14	3958/972/6347/6348/2207/3576/928/6351/414062/5641/7941/2920/2921/4067/728/3689/3553/6688/140885/54209/6850/5025/975/6280/7423/1843/1230/6355/719/2683/23075/4354/56833/2919	34
343	Mac_T	GO:0050900	leukocyte migration	43/459	396/18870	1.82129e-16	3.83512e-14	2.4923e-14	3958/972/6347/6348/2207/3576/928/6351/414062/5641/7941/2920/2921/4067/728/3689/3553/3383/6688/3055/4814/140885/54209/8764/6850/5025/975/29108/6280/7423/1843/3162/1230/6355/719/2683/23075/58191/4354/81704/56833/1880/2919	43
344	Mac_T	GO:0031349	positive regulation of defense response	47/459	480/18870	3.91769e-16	7.87455e-14	5.11736e-14	1520/7305/6348/3956/2896/4792/929/26471/7941/54502/948/4067/3553/1051/6688/23643/3055/84034/1535/4332/283131/3916/4814/55577/8673/118788/3133/1075/7097/54209/3606/4208/6850/64332/975/29108/6280/144811/8767/7099/64581/4023/51296/6622/11213/2209/81622	47
345	Mac_T	GO:0006935	chemotaxis	46/459	468/18870	7.12809e-16	1.37045e-13	8.90604e-14	3958/10457/972/6347/6348/2207/3576/6351/414062/5641/7941/2920/2921/4067/728/3689/9732/5329/5328/3553/6688/6275/2359/1890/8828/4814/5872/54209/4046/6850/8829/5025/5795/6280/7423/1843/1230/6355/719/5337/23075/58191/4354/56833/1880/2919	46
346	Mac_T	GO:0042330	taxis	46/459	470/18870	8.38224e-16	1.54443e-13	1.00366e-13	3958/10457/972/6347/6348/2207/3576/6351/414062/5641/7941/2920/2921/4067/728/3689/9732/5329/5328/3553/6688/6275/2359/1890/8828/4814/5872/54209/4046/6850/8829/5025/5795/6280/7423/1843/1230/6355/719/5337/23075/58191/4354/56833/1880/2919	46
347	Mac_T	GO:0034341	response to type II interferon	26/459	143/18870	9.43136e-16	1.66822e-13	1.08411e-13	972/6347/6348/3113/8942/6351/414062/7431/3055/1612/140885/5468/7097/4360/3460/3394/2934/55647/7099/6355/10410/3459/6622/58191/7791/965	26
348	Mac_T	GO:0022407	regulation of cell-cell adhesion	46/459	493/18870	5.06778e-15	8.61912e-13	5.60123e-13	3958/10457/972/3122/3123/6347/3956/928/3113/3115/3109/3108/3117/3119/4067/9308/3689/5329/960/3553/1051/6688/3105/84034/53827/140885/11006/3133/8613/3606/8764/6850/64332/975/29108/7805/8767/5962/920/942/567/23075/10673/81704/3557/28984	46
349	Mac_T	GO:0006898	receptor-mediated endocytosis	33/459	258/18870	6.02103e-15	9.86112e-13	6.40835e-13	348/341/2207/967/3576/928/4481/302/929/948/115548/3689/1514/1601/6386/4043/4035/440400/11006/11031/4360/6850/8685/975/8650/4074/567/6622/950/58191/51429/2209/1175	33
350	Mac_T	GO:0051251	positive regulation of lymphocyte activation	37/459	330/18870	9.23833e-15	1.459e-12	9.48145e-13	972/7305/3122/3123/6347/3956/3113/3115/3109/3108/3117/3119/4067/9308/3553/6688/3105/3916/140885/11006/3133/3606/4208/8764/6850/64332/975/29108/8767/7099/64581/920/942/567/10673/81704/1880	37
351	Mac_T	GO:0002263	cell activation involved in immune response	35/459	305/18870	2.49121e-14	3.79867e-12	2.46861e-12	3958/972/7305/3122/3123/6348/3956/2207/2896/3109/4067/3689/3383/6688/3726/4035/3916/8673/54209/3606/6850/3394/8832/64332/975/29108/8767/7099/4853/942/9846/23075/6482/1880/2268	35
352	Mac_T	GO:0030595	leukocyte chemotaxis	31/459	240/18870	3.11987e-14	4.59869e-12	2.9885e-12	3958/972/6347/6348/2207/3576/6351/414062/5641/7941/2920/2921/4067/728/3689/3553/6688/4814/6850/6280/7423/1843/1230/6355/719/23075/58191/4354/56833/1880/2919	31
353	Mac_T	GO:0002764	immune response-regulating signaling pathway	45/459	500/18870	3.78529e-14	5.39953e-12	3.50894e-12	3958/1520/7305/3123/2207/1512/4792/3115/929/948/3119/4067/5144/728/3988/23643/2359/3105/3055/1535/4332/4790/4814/55577/118788/11006/7097/54209/4208/6850/5795/64332/975/29108/7805/144811/8767/7099/64581/51296/719/11213/2209/81622/2268	45
354	Mac_T	GO:0045785	positive regulation of cell adhesion	44/459	482/18870	4.48704e-14	6.20053e-12	4.02948e-12	972/3122/3123/6347/3956/3113/3115/3109/3108/948/3117/3119/4067/9308/3689/1601/5329/960/3553/3105/84034/6281/140885/11006/3133/8613/3606/342184/8764/6850/8829/5795/64332/975/29108/8767/920/54453/942/567/10673/81704/463/3987	44
355	Mac_T	GO:0150076	neuroinflammatory response	19/459	82/18870	7.17873e-14	9.6195e-12	6.25133e-12	7305/6348/2896/9839/26471/728/3689/4318/3553/4035/712/1075/7097/54209/7133/3606/3460/3459/6622	19
356	Mac_T	GO:0030099	myeloid cell differentiation	41/459	430/18870	8.13688e-14	1.05827e-11	6.8773e-12	972/7305/3123/6348/4792/302/4067/2353/3988/4318/1051/7538/9935/4286/6688/3726/11006/5468/537/7097/54209/3091/4208/3394/4094/3398/677/1777/975/51522/7099/4853/1230/920/567/2124/9846/126014/92/1880/8837	41
357	Mac_T	GO:0002429	immune response-activating cell surface receptor signaling pathway	35/459	318/18870	8.7554e-14	1.10618e-11	7.18864e-12	3958/7305/3123/2207/4792/3115/929/3119/4067/5144/728/3988/23643/2359/3105/3055/1535/4332/4790/4814/118788/11006/7097/54209/4208/6850/5795/64332/975/7805/8767/7099/64581/719/2268	35
358	Mac_T	GO:0002366	leukocyte activation involved in immune response	34/459	301/18870	9.40484e-14	1.15523e-11	7.50737e-12	3958/972/7305/3122/3123/6348/3956/2207/2896/3109/4067/3689/3383/6688/3726/3916/8673/54209/3606/6850/3394/8832/64332/975/29108/8767/7099/4853/942/9846/23075/6482/1880/2268	34
359	Mac_T	GO:0002757	immune response-activating signaling pathway	43/459	473/18870	1.02367e-13	1.22342e-11	7.95055e-12	3958/1520/7305/3123/2207/4792/3115/929/948/3119/4067/5144/728/3988/23643/2359/3105/3055/1535/4332/4790/4814/55577/118788/11006/7097/54209/4208/6850/5795/64332/975/29108/7805/144811/8767/7099/64581/51296/719/11213/81622/2268	43
360	Mac_T	GO:0022409	positive regulation of cell-cell adhesion	35/459	322/18870	1.2717e-13	1.47985e-11	9.61698e-12	972/3122/3123/6347/3956/3113/3115/3109/3108/3117/3119/4067/9308/3689/5329/960/3553/3105/84034/140885/11006/3133/8613/3606/8764/6850/64332/975/29108/8767/920/942/567/10673/81704	35
361	Mac_T	GO:0002718	regulation of cytokine production involved in immune response	22/459	120/18870	1.32332e-13	1.50044e-11	9.75074e-12	972/54/9516/948/3553/3105/5027/11006/3133/7133/3606/8764/6850/975/29108/7805/144811/8767/7099/64581/567/11213	22
362	Mac_T	GO:0051452	intracellular pH reduction	16/459	55/18870	1.44382e-13	1.59614e-11	1.03727e-11	2896/527/23312/440400/8804/537/533/9296/10159/55647/526/8992/9114/523/56833/7879	16
363	Mac_T	GO:0071706	tumor necrosis factor superfamily cytokine production	27/459	191/18870	1.6247e-13	1.71058e-11	1.11164e-11	10457/7305/54/6348/706/929/1536/948/7538/23643/1535/140885/11006/3133/7097/54209/6850/8832/5795/29108/8767/7099/64581/4023/3459/942/11213	27
364	Mac_T	GO:1903555	regulation of tumor necrosis factor superfamily cytokine production	27/459	191/18870	1.6247e-13	1.71058e-11	1.11164e-11	10457/7305/54/6348/706/929/1536/948/7538/23643/1535/140885/11006/3133/7097/54209/6850/8832/5795/29108/8767/7099/64581/4023/3459/942/11213	27
365	Mac_T	GO:0060326	cell chemotaxis	35/459	325/18870	1.67585e-13	1.7234e-11	1.11997e-11	3958/972/6347/6348/2207/3576/6351/414062/5641/7941/2920/2921/4067/728/3689/9732/3553/6688/4814/5872/6850/8829/5025/6280/7423/1843/1230/6355/719/23075/58191/4354/56833/1880/2919	35
366	Mac_T	GO:0055094	response to lipoprotein particle	14/459	39/18870	1.80539e-13	1.81441e-11	1.17912e-11	348/2207/968/928/948/3689/5468/19/54209/6850/975/7099/4023/4864	14
367	Mac_T	GO:0002367	cytokine production involved in immune response	22/459	122/18870	1.88663e-13	1.85393e-11	1.2048e-11	972/54/9516/948/3553/3105/5027/11006/3133/7133/3606/8764/6850/975/29108/7805/144811/8767/7099/64581/567/11213	22
368	Mac_T	GO:0030100	regulation of endocytosis	33/459	291/18870	1.96766e-13	1.89152e-11	1.22923e-11	3958/348/6347/341/2207/967/302/929/948/79772/1601/3553/6386/4043/3055/1535/4035/9765/140885/11031/7097/54209/6850/5795/29108/8650/64581/567/6622/51429/2209/2268/1175	33
369	Mac_T	GO:0002768	immune response-regulating cell surface receptor signaling pathway	36/459	346/18870	2.12214e-13	1.99662e-11	1.29753e-11	3958/7305/3123/2207/4792/3115/929/3119/4067/5144/728/3988/23643/2359/3105/3055/1535/4332/4790/4814/118788/11006/7097/54209/4208/6850/5795/64332/975/7805/8767/7099/64581/719/2209/2268	36
370	Mac_T	GO:1903039	positive regulation of leukocyte cell-cell adhesion	32/459	275/18870	2.25983e-13	2.08186e-11	1.35292e-11	972/3122/3123/6347/3956/3113/3115/3109/3108/3117/3119/4067/9308/3689/960/3553/3105/140885/11006/3133/3606/8764/6850/64332/975/29108/8767/920/942/567/10673/81704	32
371	Mac_T	GO:0050729	positive regulation of inflammatory response	24/459	152/18870	3.14691e-13	2.83993e-11	1.84556e-11	6348/3956/2896/4792/26471/7941/3553/1051/283131/4814/8673/3133/1075/7097/54209/3606/64332/975/29108/6280/7099/4023/6622/2209	24
372	Mac_T	GO:0007035	vacuolar acidification	13/459	34/18870	5.14034e-13	4.54612e-11	2.95434e-11	2896/527/23312/440400/8804/537/533/9296/10159/526/8992/9114/523	13
373	Mac_T	GO:0071402	cellular response to lipoprotein particle stimulus	14/459	42/18870	5.91821e-13	5.0254e-11	3.26581e-11	348/2207/968/928/948/3689/5468/19/54209/6850/975/7099/4023/4864	14
374	Mac_T	GO:0032640	tumor necrosis factor production	26/459	186/18870	6.02321e-13	5.0254e-11	3.26581e-11	10457/7305/54/6348/706/929/1536/948/7538/23643/1535/140885/11006/3133/7097/54209/6850/8832/5795/29108/8767/7099/64581/4023/3459/11213	26
375	Mac_T	GO:0032680	regulation of tumor necrosis factor production	26/459	186/18870	6.02321e-13	5.0254e-11	3.26581e-11	10457/7305/54/6348/706/929/1536/948/7538/23643/1535/140885/11006/3133/7097/54209/6850/8832/5795/29108/8767/7099/64581/4023/3459/11213	26
376	Mac_T	GO:0050870	positive regulation of T cell activation	30/459	251/18870	6.43323e-13	5.2681e-11	3.42353e-11	972/3122/3123/6347/3956/3113/3115/3109/3108/3117/3119/4067/9308/3553/3105/140885/11006/3133/3606/8764/6850/64332/975/29108/8767/920/942/567/10673/81704	30
377	Mac_T	GO:0002573	myeloid leukocyte differentiation	29/459	235/18870	6.97078e-13	5.60451e-11	3.64215e-11	972/7305/3123/6348/302/4067/2353/4318/1051/9935/4286/6688/3726/11006/5468/537/7097/54209/3398/677/975/7099/4853/1230/920/2124/9846/126014/1880	29
378	Mac_T	GO:0050863	regulation of T cell activation	37/459	381/18870	8.07445e-13	6.37593e-11	4.14347e-11	3958/10457/972/3122/3123/6347/3956/3113/3115/3109/3108/3117/3119/4067/9308/3553/1051/3726/3105/140885/11006/3133/7133/3606/8764/6850/64332/975/29108/7805/8767/920/942/567/10673/81704/639	37
379	Mac_T	GO:0045088	regulation of innate immune response	39/459	425/18870	1.13806e-12	8.82899e-11	5.73761e-11	1520/7305/348/2896/4792/929/54502/948/4067/4780/6688/23643/3105/3055/1535/4332/3106/3916/4814/25939/55577/118788/5468/3133/7097/54209/6850/2/64332/29108/144811/8767/7099/64581/51296/11213/56833/81622/2268	39
380	Mac_T	GO:0071346	cellular response to type II interferon	21/459	120/18870	1.23759e-12	9.43556e-11	6.1318e-11	6347/6348/3113/6351/414062/7431/3055/1612/140885/5468/7097/4360/3460/3394/2934/55647/7099/6355/3459/7791/965	21
381	Mac_T	GO:0042742	defense response to bacterium	34/459	330/18870	1.33882e-12	1.00344e-10	6.52094e-11	4069/6035/54/2207/2896/948/728/3553/1051/3105/5027/84034/1535/6039/55577/3133/7097/54209/3606/8764/6850/3394/64332/29108/6280/8767/7099/4853/920/285195/219972/2209/56833/2268	34
382	Mac_T	GO:0052547	regulation of peptidase activity	33/459	312/18870	1.399e-12	1.03106e-10	6.70047e-11	1520/1471/1509/2896/1512/5641/1476/4067/1514/5329/4318/960/2876/7077/831/4035/1612/5468/1475/10010/6850/2934/1992/29108/6280/5176/7805/8767/64581/1513/6622/444/5269	33
383	Mac_T	GO:0007040	lysosome organization	20/459	109/18870	1.705e-12	1.21605e-10	7.90265e-11	2896/3988/527/5027/3074/440400/8804/19/537/533/9296/10159/55647/7805/1200/3073/950/523/7879/55207	20
384	Mac_T	GO:0080171	lytic vacuole organization	20/459	109/18870	1.705e-12	1.21605e-10	7.90265e-11	2896/3988/527/5027/3074/440400/8804/19/537/533/9296/10159/55647/7805/1200/3073/950/523/7879/55207	20
385	Mac_T	GO:1905954	positive regulation of lipid localization	20/459	111/18870	2.43045e-12	1.70594e-10	1.10862e-10	348/123/4792/4481/302/948/1601/3553/2180/5027/4790/4035/1622/5468/19/54209/5025/4023/2170/6696	20
386	Mac_T	GO:0071404	cellular response to low-density lipoprotein particle stimulus	13/459	38/18870	2.74492e-12	1.89657e-10	1.2325e-10	2207/968/928/948/3689/5468/19/54209/6850/975/7099/4023/4864	13
387	Mac_T	GO:0007159	leukocyte cell-cell adhesion	38/459	419/18870	3.21698e-12	2.18854e-10	1.42224e-10	3958/10457/972/3122/3123/6347/3956/3113/3115/3109/3108/3117/3119/4067/9308/3689/960/3553/1051/3383/3105/140885/11006/3133/3606/8764/6850/64332/975/29108/6280/7805/8767/920/942/567/10673/81704	38
388	Mac_T	GO:1903037	regulation of leukocyte cell-cell adhesion	36/459	382/18870	4.02747e-12	2.6984e-10	1.75359e-10	3958/10457/972/3122/3123/6347/3956/3113/3115/3109/3108/3117/3119/4067/9308/3689/960/3553/1051/3105/140885/11006/3133/3606/8764/6850/64332/975/29108/7805/8767/920/942/567/10673/81704	36
389	Mac_T	GO:0061900	glial cell activation	15/459	57/18870	4.25935e-12	2.81117e-10	1.82687e-10	7305/6348/2896/9839/728/3689/3553/4035/712/1075/7097/54209/3460/3459/6622	15
390	Mac_T	GO:0046651	lymphocyte proliferation	32/459	307/18870	4.58059e-12	2.97873e-10	1.93576e-10	3958/10457/972/7305/3123/3113/3115/3109/4067/3988/3553/1051/3105/5027/4332/11006/3133/7133/3606/4208/8764/6850/64332/975/29108/8767/7099/942/10673/7940/81704/1880	32
391	Mac_T	GO:0050670	regulation of lymphocyte proliferation	28/459	238/18870	5.66862e-12	3.63285e-10	2.36085e-10	3958/10457/972/7305/3123/3113/3115/3109/4067/3553/1051/3105/4332/11006/3133/7133/3606/4208/8764/6850/975/29108/8767/7099/942/10673/7940/1880	28
392	Mac_T	GO:0002833	positive regulation of response to biotic stimulus	35/459	369/18870	6.74464e-12	4.26068e-10	2.76885e-10	1520/7305/3123/2896/4792/929/54502/948/4067/6688/23643/3055/84034/1535/4332/9450/3916/4814/55577/118788/3133/7097/54209/6850/64332/29108/144811/23328/8767/7099/64581/51296/11213/1687/81622	35
393	Mac_T	GO:0051235	maintenance of location	34/459	350/18870	7.02298e-12	4.31328e-10	2.80303e-10	2512/348/2495/6348/10577/123/4792/706/4481/948/4067/5144/3988/3553/5027/1535/4790/6546/3074/5552/5468/19/2760/54209/2934/400916/6280/805/4023/920/6622/3073/4864/55704	34
394	Mac_T	GO:0070661	leukocyte proliferation	34/459	350/18870	7.02298e-12	4.31328e-10	2.80303e-10	3958/10457/972/7305/3123/3113/3115/3109/4067/3988/3553/1051/3726/3105/5027/4332/11006/3133/54209/7133/3606/4208/8764/6850/64332/975/29108/8767/7099/942/10673/7940/81704/1880	34
395	Mac_T	GO:0002720	positive regulation of cytokine production involved in immune response	17/459	81/18870	8.36404e-12	5.00441e-10	3.25217e-10	972/948/3553/3105/5027/3133/3606/8764/6850/975/29108/7805/144811/8767/7099/64581/567	17
396	Mac_T	GO:0032943	mononuclear cell proliferation	32/459	314/18870	8.37464e-12	5.00441e-10	3.25217e-10	3958/10457/972/7305/3123/3113/3115/3109/4067/3988/3553/1051/3105/5027/4332/11006/3133/7133/3606/4208/8764/6850/64332/975/29108/8767/7099/942/10673/7940/81704/1880	32
397	Mac_T	GO:0032944	regulation of mononuclear cell proliferation	28/459	242/18870	8.50258e-12	5.01312e-10	3.25783e-10	3958/10457/972/7305/3123/3113/3115/3109/4067/3553/1051/3105/4332/11006/3133/7133/3606/4208/8764/6850/975/29108/8767/7099/942/10673/7940/1880	28
398	Mac_T	GO:0030641	regulation of cellular pH	18/459	93/18870	8.67738e-12	5.04887e-10	3.28106e-10	2896/527/23312/440400/8804/537/533/9296/10159/55647/144811/526/285195/8992/9114/523/56833/7879	18
399	Mac_T	GO:0030593	neutrophil chemotaxis	19/459	107/18870	1.13078e-11	6.49391e-10	4.22014e-10	3958/972/6347/6348/2207/3576/6351/414062/2920/2921/728/3689/3553/6850/6280/6355/719/4354/2919	19
400	Mac_T	GO:0002685	regulation of leukocyte migration	27/459	230/18870	1.43767e-11	8.15047e-10	5.29667e-10	3958/972/6347/6348/3576/928/6351/5641/7941/4067/728/3383/6688/54209/8764/5025/975/29108/7423/1843/3162/1230/719/23075/4354/81704/56833	27
401	Mac_T	GO:0002703	regulation of leukocyte mediated immunity	28/459	249/18870	1.69336e-11	9.47854e-10	6.15973e-10	7305/3122/3123/4067/3689/3553/3383/6688/3105/5027/3106/3916/8673/11006/3133/54209/7133/3606/6850/8832/975/7099/64581/567/9846/8417/2209/2268	28
402	Mac_T	GO:1903557	positive regulation of tumor necrosis factor superfamily cytokine production	19/459	110/18870	1.8783e-11	1.03823e-09	6.74705e-10	7305/6348/929/1536/948/23643/1535/3133/7097/6850/8832/5795/29108/8767/7099/64581/4023/3459/942	19
403	Mac_T	GO:0002443	leukocyte mediated immunity	39/459	466/18870	1.949e-11	1.06401e-09	6.91459e-10	972/7305/3122/3123/6348/2207/1512/4067/3689/3553/3383/6688/3105/5027/712/3106/3916/8673/11006/3133/1075/54209/7133/3606/6850/8832/64332/975/7099/64581/567/9846/23075/8417/57823/2209/81622/2268/55207	39
404	Mac_T	GO:0002399	MHC class II protein complex assembly	9/459	16/18870	2.71264e-11	1.44522e-09	9.3919e-10	3122/3123/3113/3115/3109/3108/3117/3119/567	9
405	Mac_T	GO:0002503	peptide antigen assembly with MHC class II protein complex	9/459	16/18870	2.71264e-11	1.44522e-09	9.3919e-10	3122/3123/3113/3115/3109/3108/3117/3119/567	9
406	Mac_T	GO:0045862	positive regulation of proteolysis	33/459	350/18870	3.22926e-11	1.69488e-09	1.10143e-09	1520/348/1509/2896/1512/302/5641/26471/4067/1514/1601/3553/4780/6281/1612/5468/1075/54209/7133/10010/11337/6850/2934/29108/6280/7805/8767/64581/1513/6622/51429/444/255488	33
407	Mac_T	GO:0043410	positive regulation of MAPK cascade	39/459	474/18870	3.2579e-11	1.69488e-09	1.10143e-09	10457/972/3123/348/6347/6348/6351/414062/948/728/960/3553/6386/3383/6688/5027/23533/54209/4208/9518/6850/8829/8685/5795/975/29108/7805/23328/8767/7099/4853/1230/6355/920/8826/1687/1880/8837/1116	39
408	Mac_T	GO:0051453	regulation of intracellular pH	17/459	89/18870	4.12725e-11	2.12217e-09	1.37912e-09	2896/527/23312/440400/8804/537/533/9296/10159/55647/526/285195/8992/9114/523/56833/7879	17
409	Mac_T	GO:0002274	myeloid leukocyte activation	27/459	241/18870	4.27589e-11	2.15557e-09	1.40082e-09	972/7305/6348/2207/2896/3576/4067/728/3689/6688/712/8673/11006/1075/7097/54209/3606/3460/6850/8832/29108/7099/4853/3459/6622/9846/2268	27
410	Mac_T	GO:1990266	neutrophil migration	20/459	129/18870	4.28969e-11	2.15557e-09	1.40082e-09	3958/972/6347/6348/2207/3576/6351/414062/2920/2921/728/3689/3553/6850/6280/6355/719/4354/56833/2919	20
411	Mac_T	GO:0034612	response to tumor necrosis factor	28/459	259/18870	4.34119e-11	2.15694e-09	1.40171e-09	6347/6348/3576/4792/6351/414062/427/929/2353/7538/4780/55022/4790/7133/10010/8764/6850/677/29108/7805/6355/1513/58191/10673/1687/965/3987/1116	28
412	Mac_T	GO:0002700	regulation of production of molecular mediator of immune response	24/459	191/18870	4.7431e-11	2.33044e-09	1.51446e-09	972/54/9516/948/3553/3105/5027/11006/3133/7133/3606/8764/6850/975/29108/7805/144811/8767/7099/64581/942/567/11213/7009	24
413	Mac_T	GO:0070371	ERK1 and ERK2 cascade	32/459	336/18870	4.99057e-11	2.40428e-09	1.56245e-09	10457/972/3123/348/6347/6348/1512/6351/414062/948/4067/728/1601/960/3553/3383/140885/54209/6850/8829/8685/677/29108/8767/7099/4853/1230/6355/920/1880/8837/1116	32
414	Mac_T	GO:1903706	regulation of hemopoiesis	36/459	417/18870	5.01097e-11	2.40428e-09	1.56245e-09	972/7305/3122/3123/6348/4792/4067/2353/9308/1051/7538/9935/4286/6688/3726/3106/11006/54209/3091/3606/4208/6850/3398/64332/677/8767/7099/4853/1230/920/942/567/2124/92/56833/639	36
415	Mac_T	GO:1903131	mononuclear cell differentiation	39/459	481/18870	5.05649e-11	2.40428e-09	1.56245e-09	972/3122/3123/3956/2207/4067/2353/9308/1514/3988/3553/1051/9935/1316/6688/3726/3106/11006/5468/54209/3606/6850/3394/1958/3398/5795/64332/677/8767/4853/1513/920/942/567/10673/56833/6482/1880/639	39
416	Mac_T	GO:0006885	regulation of pH	18/459	103/18870	5.23033e-11	2.46048e-09	1.59897e-09	2896/527/23312/440400/8804/537/533/9296/10159/55647/144811/526/285195/8992/9114/523/56833/7879	18
417	Mac_T	GO:0045637	regulation of myeloid cell differentiation	25/459	213/18870	8.32669e-11	3.87586e-09	2.51877e-09	972/7305/3123/6348/4792/4067/2353/1051/7538/9935/4286/6688/11006/54209/3091/4208/3398/677/7099/4853/1230/920/567/2124/92	25
418	Mac_T	GO:0030316	osteoclast differentiation	18/459	106/18870	8.59819e-11	3.91971e-09	2.54727e-09	7305/6348/302/2353/1051/9935/4286/3726/11006/537/54209/975/7099/4853/1230/9846/126014/1880	18
419	Mac_T	GO:0032760	positive regulation of tumor necrosis factor production	18/459	106/18870	8.59819e-11	3.91971e-09	2.54727e-09	7305/6348/929/1536/948/23643/1535/3133/7097/6850/8832/5795/29108/8767/7099/64581/4023/3459	18
420	Mac_T	GO:0070663	regulation of leukocyte proliferation	28/459	267/18870	8.913e-11	4.02177e-09	2.61359e-09	3958/10457/972/7305/3123/3113/3115/3109/4067/3553/1051/3105/4332/11006/3133/7133/3606/4208/8764/6850/975/29108/8767/7099/942/10673/7940/1880	28
421	Mac_T	GO:0019915	lipid storage	17/459	94/18870	1.02541e-10	4.58017e-09	2.97647e-09	348/10577/123/4792/4481/948/3988/3553/4790/3074/5468/19/2760/54209/4023/3073/4864	17
422	Mac_T	GO:1905952	regulation of lipid localization	23/459	183/18870	1.20183e-10	5.31449e-09	3.45368e-09	348/341/123/4792/706/4481/302/948/1601/3553/2180/5027/4790/4035/1622/5468/19/54209/6850/5025/4023/2170/6696	23
423	Mac_T	GO:0070374	positive regulation of ERK1 and ERK2 cascade	25/459	218/18870	1.37676e-10	6.02774e-09	3.91719e-09	10457/972/3123/348/6347/6348/6351/414062/948/728/960/3383/54209/8829/8685/29108/8767/7099/4853/1230/6355/920/1880/8837/1116	25
424	Mac_T	GO:0071356	cellular response to tumor necrosis factor	26/459	238/18870	1.72774e-10	7.48845e-09	4.86645e-09	6347/6348/3576/4792/6351/414062/427/2353/7538/4780/55022/4790/7133/10010/8764/6850/677/29108/7805/6355/1513/10673/1687/965/3987/1116	26
425	Mac_T	GO:0070372	regulation of ERK1 and ERK2 cascade	30/459	313/18870	1.74426e-10	7.48845e-09	4.86645e-09	10457/972/3123/348/6347/6348/6351/414062/948/4067/728/1601/960/3553/3383/140885/54209/6850/8829/8685/29108/8767/7099/4853/1230/6355/920/1880/8837/1116	30
426	Mac_T	GO:0045807	positive regulation of endocytosis	21/459	155/18870	1.89272e-10	8.04771e-09	5.22989e-09	348/6347/2207/967/302/929/948/1601/3553/1535/4035/140885/11031/54209/6850/5795/29108/64581/567/6622/2209	21
427	Mac_T	GO:0070555	response to interleukin-1	20/459	140/18870	1.95821e-10	8.24687e-09	5.35932e-09	6347/6348/3576/4792/6351/414062/3553/4790/140885/8564/3091/10010/1958/29108/8767/6355/6622/11213/3557/1116	20
428	Mac_T	GO:0002819	regulation of adaptive immune response	24/459	208/18870	2.84989e-10	1.18889e-08	7.72611e-09	3122/3123/3553/3726/3105/5027/3106/11006/3133/54209/7133/3606/4208/8764/64332/975/29108/8767/64581/920/567/8417/10673/2209	24
429	Mac_T	GO:1902105	regulation of leukocyte differentiation	30/459	321/18870	3.22528e-10	1.33291e-08	8.66208e-09	972/7305/3122/3123/6348/4067/2353/9308/1051/9935/4286/6688/3726/3106/11006/54209/3606/6850/3398/64332/677/8767/7099/4853/1230/920/942/2124/56833/639	30
430	Mac_T	GO:0002396	MHC protein complex assembly	9/459	20/18870	3.65192e-10	1.48154e-08	9.62794e-09	3122/3123/3113/3115/3109/3108/3117/3119/567	9
431	Mac_T	GO:0002501	peptide antigen assembly with MHC protein complex	9/459	20/18870	3.65192e-10	1.48154e-08	9.62794e-09	3122/3123/3113/3115/3109/3108/3117/3119/567	9
432	Mac_T	GO:0002821	positive regulation of adaptive immune response	19/459	130/18870	3.74774e-10	1.49302e-08	9.70253e-09	3122/3123/3553/3105/5027/3106/3133/54209/3606/64332/975/29108/8767/64581/920/567/8417/10673/2209	19
433	Mac_T	GO:0071621	granulocyte chemotaxis	19/459	130/18870	3.74774e-10	1.49302e-08	9.70253e-09	3958/972/6347/6348/2207/3576/6351/414062/2920/2921/728/3689/3553/6850/6280/6355/719/4354/2919	19
434	Mac_T	GO:0007033	vacuole organization	25/459	232/18870	5.21335e-10	2.05834e-08	1.33764e-08	1509/2896/302/26471/3988/527/5027/3074/440400/8804/19/537/10533/11337/533/9296/10159/55647/7805/1200/3073/950/523/7879/55207	25
435	Mac_T	GO:0032642	regulation of chemokine production	17/459	104/18870	5.35042e-10	2.09377e-08	1.36066e-08	972/3553/140885/11006/7097/54209/3091/3606/6850/1958/8832/29108/8767/7099/3162/64581/4023	17
436	Mac_T	GO:0032602	chemokine production	17/459	105/18870	6.24301e-10	2.42163e-08	1.57372e-08	972/3553/140885/11006/7097/54209/3091/3606/6850/1958/8832/29108/8767/7099/3162/64581/4023	17
437	Mac_T	GO:0007042	lysosomal lumen acidification	9/459	22/18870	1.03567e-09	3.98239e-08	2.588e-08	2896/527/440400/8804/537/533/9296/10159/523	9
438	Mac_T	GO:0044000	movement in host	22/459	188/18870	1.2146e-09	4.58018e-08	2.97648e-08	972/3123/1508/3956/3576/1514/3383/3916/8673/440400/4360/8764/2934/8829/975/10410/920/942/950/4864/7879/55207	22
439	Mac_T	GO:0002761	regulation of myeloid leukocyte differentiation	18/459	124/18870	1.22221e-09	4.58018e-08	2.97648e-08	972/7305/3123/6348/4067/2353/1051/9935/4286/11006/54209/3398/677/7099/4853/1230/920/2124	18
440	Mac_T	GO:0002824	positive regulation of adaptive immune response based on somatic recombination of immune receptors built from immunoglobulin superfamily domains	18/459	124/18870	1.22221e-09	4.58018e-08	2.97648e-08	3122/3123/3553/3105/5027/3106/3133/54209/3606/64332/975/8767/64581/920/567/8417/10673/2209	18
441	Mac_T	GO:0097530	granulocyte migration	20/459	156/18870	1.38827e-09	5.15876e-08	3.35248e-08	3958/972/6347/6348/2207/3576/6351/414062/2920/2921/728/3689/3553/6850/6280/6355/719/4354/56833/2919	20
442	Mac_T	GO:0001774	microglial cell activation	12/459	49/18870	1.51756e-09	5.549e-08	3.60608e-08	7305/6348/2896/728/3689/712/1075/7097/54209/3460/3459/6622	12
443	Mac_T	GO:0071347	cellular response to interleukin-1	17/459	111/18870	1.51838e-09	5.549e-08	3.60608e-08	6347/6348/3576/4792/6351/414062/3553/4790/140885/8564/3091/10010/1958/29108/6355/11213/3557	17
444	Mac_T	GO:0032722	positive regulation of chemokine production	14/459	72/18870	1.71791e-09	6.22672e-08	4.0465e-08	972/3553/7097/3091/3606/6850/1958/8832/29108/8767/7099/3162/64581/4023	14
445	Mac_T	GO:0045730	respiratory burst	11/459	40/18870	1.91592e-09	6.88796e-08	4.47621e-08	2896/1536/4688/3988/3055/1535/54209/1043/64581/4689/56833	11
446	Mac_T	GO:0002822	regulation of adaptive immune response based on somatic recombination of immune receptors built from immunoglobulin superfamily domains	22/459	193/18870	2.00209e-09	7.13971e-08	4.63982e-08	3122/3123/3553/3726/3105/5027/3106/11006/3133/54209/7133/3606/4208/64332/975/8767/64581/920/567/8417/10673/2209	22
447	Mac_T	GO:0032370	positive regulation of lipid transport	15/459	86/18870	2.20538e-09	7.80176e-08	5.07006e-08	348/4792/302/1601/3553/2180/5027/4035/1622/5468/19/54209/5025/2170/6696	15
448	Mac_T	GO:0032635	interleukin-6 production	21/459	177/18870	2.25516e-09	7.85222e-08	5.10285e-08	972/7305/948/3553/1051/5027/1535/3106/140885/11006/7097/54209/6850/8832/29108/8767/7099/64581/4023/11213/81622	21
449	Mac_T	GO:0032675	regulation of interleukin-6 production	21/459	177/18870	2.25516e-09	7.85222e-08	5.10285e-08	972/7305/948/3553/1051/5027/1535/3106/140885/11006/7097/54209/6850/8832/29108/8767/7099/64581/4023/11213/81622	21
450	Mac_T	GO:0002456	T cell mediated immunity	18/459	129/18870	2.34708e-09	8.10843e-08	5.26935e-08	3122/3123/1512/3553/3383/3105/5027/3106/11006/3133/1075/7133/3606/64332/975/567/8417/81622	18
451	Mac_T	GO:0050764	regulation of phagocytosis	16/459	100/18870	2.39302e-09	8.20304e-08	5.33084e-08	6347/2207/948/3553/3055/1535/140885/11031/7097/54209/6850/5795/29108/64581/2209/2268	16
452	Mac_T	GO:0042098	T cell proliferation	23/459	213/18870	2.48606e-09	8.45643e-08	5.4955e-08	3958/10457/3123/3113/3115/3109/3988/3553/1051/3105/5027/11006/3133/7133/3606/8764/6850/975/29108/8767/942/10673/81704	23
453	Mac_T	GO:0044409	entry into host	20/459	163/18870	3.02268e-09	1.02033e-07	6.6307e-08	972/3123/1508/3956/3576/1514/3383/3916/8673/440400/4360/8764/2934/8829/975/10410/920/942/950/4864	20
454	Mac_T	GO:0002269	leukocyte activation involved in inflammatory response	12/459	52/18870	3.1773e-09	1.0644e-07	6.91709e-08	7305/6348/2896/728/3689/712/1075/7097/54209/3460/3459/6622	12
455	Mac_T	GO:0032615	interleukin-12 production	13/459	64/18870	3.7442e-09	1.23558e-07	8.02958e-08	54/948/4790/3106/7097/6850/3394/7805/8767/7099/64581/11213/81622	13
456	Mac_T	GO:0032655	regulation of interleukin-12 production	13/459	64/18870	3.7442e-09	1.23558e-07	8.02958e-08	54/948/4790/3106/7097/6850/3394/7805/8767/7099/64581/11213/81622	13
457	Mac_T	GO:0002687	positive regulation of leukocyte migration	19/459	149/18870	3.933e-09	1.28033e-07	8.32038e-08	3958/972/6348/3576/6351/5641/7941/728/3383/6688/54209/8764/5025/29108/7423/1230/719/23075/81704	19
458	Mac_T	GO:0050830	defense response to Gram-positive bacterium	17/459	118/18870	3.98088e-09	1.28033e-07	8.32038e-08	4069/6035/54/948/728/3553/3105/5027/6039/3133/7097/3606/8764/29108/8767/219972/2268	17
459	Mac_T	GO:0010878	cholesterol storage	9/459	25/18870	3.98614e-09	1.28033e-07	8.32038e-08	10577/4481/948/3988/5468/19/54209/4023/4864	9
460	Mac_T	GO:0010720	positive regulation of cell development	34/459	444/18870	3.99561e-09	1.28033e-07	8.32038e-08	972/7305/3122/3123/706/4067/2353/9308/3553/6688/11006/7097/54209/7133/3091/3606/23191/6850/8829/3398/64332/677/57698/5176/8650/8767/4853/64581/1230/920/942/2124/23129/10154	34
461	Mac_T	GO:0014002	astrocyte development	11/459	43/18870	4.46334e-09	1.41695e-07	9.20817e-08	2896/9839/7431/728/3553/4035/712/54209/6280/7099/3459	11
462	Mac_T	GO:0002460	adaptive immune response based on somatic recombination of immune receptors built from immunoglobulin superfamily domains	31/459	380/18870	4.48603e-09	1.41695e-07	9.20817e-08	972/3122/3123/2207/1512/3553/3383/3726/3105/5027/712/3106/11006/3133/1075/54209/7133/3606/4208/64332/975/8767/7099/64581/920/567/23075/8417/10673/2209/81622	31
463	Mac_T	GO:0002702	positive regulation of production of molecular mediator of immune response	18/459	136/18870	5.55597e-09	1.74245e-07	1.13235e-07	972/948/3553/3105/5027/3133/3606/8764/6850/975/29108/7805/144811/8767/7099/64581/942/567	18
464	Mac_T	GO:0001906	cell killing	23/459	223/18870	6.04265e-09	1.88173e-07	1.22286e-07	4069/7305/3122/3123/1512/3383/6688/3105/5027/3106/3916/4814/966/3133/1075/3606/6850/64581/567/8417/57823/2209/55207	23
465	Mac_T	GO:0032368	regulation of lipid transport	19/459	153/18870	6.14685e-09	1.9008e-07	1.23525e-07	348/341/4792/706/302/1601/3553/2180/5027/4790/4035/1622/5468/19/54209/6850/5025/2170/6696	19
466	Mac_T	GO:0050777	negative regulation of immune response	22/459	205/18870	6.21953e-09	1.90992e-07	1.24118e-07	3958/3123/2896/4067/2876/6688/3105/3055/3106/25939/11006/5468/966/3133/54209/8764/6850/2/8832/11213/56833/2268	22
467	Mac_T	GO:0010952	positive regulation of peptidase activity	20/459	170/18870	6.31191e-09	1.92492e-07	1.25093e-07	1520/1509/2896/1512/5641/4067/1514/1612/5468/10010/6850/2934/29108/6280/7805/8767/64581/1513/6622/444	20
468	Mac_T	GO:0045089	positive regulation of innate immune response	29/459	343/18870	6.42128e-09	1.94485e-07	1.26388e-07	1520/7305/4792/929/54502/948/4067/6688/23643/3055/1535/4332/3916/4814/55577/118788/3133/7097/54209/6850/64332/29108/144811/8767/7099/64581/51296/11213/81622	29
469	Mac_T	GO:0002437	inflammatory response to antigenic stimulus	14/459	80/18870	7.25995e-09	2.17523e-07	1.41359e-07	3123/968/4067/2876/3055/3133/54209/6850/2/975/4853/2209/2268/3557	14
470	Mac_T	GO:0061795	Golgi lumen acidification	7/459	13/18870	7.28027e-09	2.17523e-07	1.41359e-07	527/440400/537/533/9296/10159/523	7
471	Mac_T	GO:0071674	mononuclear cell migration	22/459	207/18870	7.44955e-09	2.21087e-07	1.43675e-07	3958/6347/6348/6351/414062/5641/7941/4067/728/3383/6688/140885/8764/29108/1843/1230/6355/719/58191/81704/56833/1880	22
472	Mac_T	GO:0046718	viral entry into host cell	19/459	156/18870	8.50911e-09	2.50849e-07	1.63017e-07	972/3123/1508/3956/1514/3383/3916/8673/440400/4360/8764/2934/8829/975/10410/920/942/950/4864	19
473	Mac_T	GO:0001909	leukocyte mediated cytotoxicity	18/459	140/18870	8.86751e-09	2.59683e-07	1.68758e-07	7305/3122/3123/1512/3383/6688/3105/5027/3106/3916/3133/1075/3606/567/8417/57823/2209/55207	18
474	Mac_T	GO:0042116	macrophage activation	16/459	110/18870	9.93294e-09	2.8897e-07	1.8779e-07	972/7305/6348/2896/728/3689/712/1075/7097/54209/3460/6850/8832/7099/3459/6622	16
475	Mac_T	GO:0051701	biological process involved in interaction with host	22/459	211/18870	1.06149e-08	3.06792e-07	1.99372e-07	972/3123/1508/3956/3576/1514/3383/3916/8673/440400/4360/8764/2934/8829/975/10410/920/942/950/4864/7879/55207	22
476	Mac_T	GO:0002688	regulation of leukocyte chemotaxis	17/459	126/18870	1.1008e-08	3.16086e-07	2.05412e-07	972/6347/6348/3576/6351/5641/7941/4067/728/6688/7423/1843/1230/719/23075/4354/56833	17
477	Mac_T	GO:0031663	lipopolysaccharide-mediated signaling pathway	12/459	58/18870	1.20293e-08	3.43183e-07	2.23021e-07	4792/929/948/4067/6688/23643/3055/9450/7097/23328/8767/7099	12
478	Mac_T	GO:0002285	lymphocyte activation involved in immune response	22/459	213/18870	1.2629e-08	3.55983e-07	2.31339e-07	3958/972/3122/3123/3956/2207/3109/3383/6688/3726/3916/3606/3394/64332/975/8767/7099/4853/942/23075/6482/1880	22
479	Mac_T	GO:0010934	macrophage cytokine production	10/459	37/18870	1.27194e-08	3.55983e-07	2.31339e-07	972/54/9516/948/5027/29108/7805/8767/7099/11213	10
480	Mac_T	GO:0010935	regulation of macrophage cytokine production	10/459	37/18870	1.27194e-08	3.55983e-07	2.31339e-07	972/54/9516/948/5027/29108/7805/8767/7099/11213	10
481	Mac_T	GO:0031623	receptor internalization	17/459	128/18870	1.40159e-08	3.89801e-07	2.53317e-07	2207/967/3576/928/302/948/3689/6386/4043/4035/11006/11031/6850/975/8650/6622/1175	17
482	Mac_T	GO:0048388	endosomal lumen acidification	7/459	14/18870	1.42558e-08	3.93994e-07	2.56041e-07	527/440400/537/533/9296/10159/523	7
483	Mac_T	GO:0002440	production of molecular mediator of immune response	27/459	314/18870	1.5119e-08	4.15255e-07	2.69858e-07	972/54/9516/948/3553/3105/5027/25939/11006/3133/7133/3606/8764/6850/64332/975/29108/7805/144811/8767/7099/64581/942/567/11213/23075/7009	27
484	Mac_T	GO:1990868	response to chemokine	15/459	99/18870	1.63268e-08	4.42928e-07	2.87842e-07	6347/6348/3576/6351/414062/2920/2921/4067/54209/3091/1843/1230/6355/81704/2919	15
485	Mac_T	GO:1990869	cellular response to chemokine	15/459	99/18870	1.63268e-08	4.42928e-07	2.87842e-07	6347/6348/3576/6351/414062/2920/2921/4067/54209/3091/1843/1230/6355/81704/2919	15
486	Mac_T	GO:0002758	innate immune response-activating signaling pathway	24/459	255/18870	1.7153e-08	4.62505e-07	3.00564e-07	1520/7305/4792/929/948/4067/23643/3055/1535/4814/55577/118788/7097/54209/6850/64332/29108/144811/8767/7099/64581/51296/11213/81622	24
487	Mac_T	GO:0002218	activation of innate immune response	25/459	276/18870	1.8603e-08	4.9856e-07	3.23994e-07	1520/7305/4792/929/948/4067/23643/3055/1535/4332/4814/55577/118788/7097/54209/6850/64332/29108/144811/8767/7099/64581/51296/11213/81622	25
488	Mac_T	GO:0042129	regulation of T cell proliferation	20/459	182/18870	2.04408e-08	5.44512e-07	3.53857e-07	3958/10457/3123/3113/3115/3109/3553/1051/3105/11006/3133/7133/3606/8764/6850/975/29108/8767/942/10673	20
489	Mac_T	GO:0042113	B cell activation	25/459	278/18870	2.14829e-08	5.66437e-07	3.68105e-07	972/7305/3956/4067/1316/6688/4332/4208/8935/6850/3394/3398/5795/64332/677/975/7805/7099/4853/942/23075/10673/56833/6482/1880	25
490	Mac_T	GO:0006959	humoral immune response	24/459	258/18870	2.152e-08	5.66437e-07	3.68105e-07	4069/3123/6347/3576/1675/2920/2921/3119/9308/3553/3105/712/6039/966/3133/54209/4208/2/975/6280/4853/1880/2919/28984	24
491	Mac_T	GO:0030098	lymphocyte differentiation	32/459	429/18870	2.16625e-08	5.66815e-07	3.68351e-07	972/3122/3123/3956/2207/9308/1514/3988/3553/9935/1316/6688/3726/11006/3606/6850/3394/1958/3398/5795/64332/677/8767/4853/920/942/567/10673/56833/6482/1880/639	32
492	Mac_T	GO:0097242	amyloid-beta clearance	10/459	39/18870	2.22244e-08	5.78097e-07	3.75683e-07	348/4481/948/728/3689/4043/4035/54209/8685/3459	10
493	Mac_T	GO:0061082	myeloid leukocyte cytokine production	11/459	50/18870	2.4861e-08	6.42896e-07	4.17793e-07	972/54/9516/948/5027/6850/29108/7805/8767/7099/11213	11
494	Mac_T	GO:0035751	regulation of lysosomal lumen pH	9/459	30/18870	2.50531e-08	6.44098e-07	4.18574e-07	2896/527/440400/8804/537/533/9296/10159/523	9
495	Mac_T	GO:0044403	biological process involved in symbiotic interaction	27/459	322/18870	2.56637e-08	6.55982e-07	4.26297e-07	972/3123/348/6348/1508/3956/3576/6351/1514/2876/3383/3916/8673/440400/4360/8764/2934/8829/975/6355/10410/920/942/950/4864/7879/55207	27
496	Mac_T	GO:1902107	positive regulation of leukocyte differentiation	20/459	185/18870	2.69931e-08	6.82077e-07	4.43255e-07	972/7305/3122/3123/2353/9308/6688/11006/54209/3606/6850/3398/64332/677/8767/4853/1230/920/942/2124	20
497	Mac_T	GO:1903708	positive regulation of hemopoiesis	20/459	185/18870	2.69931e-08	6.82077e-07	4.43255e-07	972/7305/3122/3123/2353/9308/6688/11006/54209/3606/6850/3398/64332/677/8767/4853/1230/920/942/2124	20
498	Mac_T	GO:0016050	vesicle organization	29/459	366/18870	2.72274e-08	6.84088e-07	4.44562e-07	348/9839/302/6386/8878/527/5027/10981/9765/6281/8673/5872/5552/440400/19/537/8905/533/9296/10159/55647/526/6622/9114/8417/950/523/7879/55207	29
499	Mac_T	GO:0009595	detection of biotic stimulus	10/459	40/18870	2.8994e-08	7.24357e-07	4.70731e-07	3123/706/23643/3105/3106/7097/54209/5795/7099/64581	10
500	Mac_T	GO:0002705	positive regulation of leukocyte mediated immunity	18/459	151/18870	2.95096e-08	7.33097e-07	4.76411e-07	7305/3122/3123/3689/3553/6688/3105/5027/3106/3916/3133/54209/3606/975/64581/567/8417/2209	18
501	Mac_T	GO:0032609	type II interferon production	16/459	119/18870	3.13268e-08	7.69595e-07	5.0013e-07	3123/3113/3115/929/5144/3553/3105/140885/11006/3606/3394/29108/7805/8767/7099/64581	16
502	Mac_T	GO:0032649	regulation of type II interferon production	16/459	119/18870	3.13268e-08	7.69595e-07	5.0013e-07	3123/3113/3115/929/5144/3553/3105/140885/11006/3606/3394/29108/7805/8767/7099/64581	16
503	Mac_T	GO:0031343	positive regulation of cell killing	13/459	76/18870	3.33842e-08	8.15607e-07	5.30031e-07	7305/3122/3123/6688/3105/5027/3106/3916/3133/6850/64581/567/8417	13
504	Mac_T	GO:0042554	superoxide anion generation	10/459	41/18870	3.75205e-08	9.11625e-07	5.92429e-07	7305/54/1536/6648/3689/4688/1535/6850/64581/4689	10
505	Mac_T	GO:0070391	response to lipoteichoic acid	6/459	10/18870	3.8766e-08	9.31648e-07	6.05441e-07	929/948/7097/54209/8767/7099	6
506	Mac_T	GO:0071223	cellular response to lipoteichoic acid	6/459	10/18870	3.8766e-08	9.31648e-07	6.05441e-07	929/948/7097/54209/8767/7099	6
507	Mac_T	GO:0002220	innate immune response activating cell surface receptor signaling pathway	14/459	91/18870	4.02908e-08	9.63059e-07	6.25855e-07	7305/4792/929/4067/23643/1535/4814/118788/7097/54209/6850/8767/7099/64581	14
508	Mac_T	GO:0002532	production of molecular mediator involved in inflammatory response	15/459	106/18870	4.20752e-08	1.0003e-06	6.50058e-07	2896/23646/948/4067/3988/8673/140885/11006/54209/3091/6850/29108/7099/64581/56833	15
509	Mac_T	GO:0010324	membrane invagination	12/459	65/18870	4.65695e-08	1.10123e-06	7.15647e-07	4481/948/115548/3689/19/11031/54209/56907/2934/8685/51429/2209	12
510	Mac_T	GO:0007264	small GTPase mediated signal transduction	34/459	491/18870	4.84051e-08	1.13855e-06	7.39899e-07	348/2203/9732/3988/6386/8878/153020/93663/19/23179/90627/23433/23191/11337/8829/57514/5912/57698/58504/4853/5962/54453/79658/29/7204/23362/5337/23075/121512/81704/55704/25780/83478/10602	34
511	Mac_T	GO:0008360	regulation of cell shape	17/459	140/18870	5.43374e-08	1.27132e-06	8.26183e-07	6347/6348/3689/3055/93663/3074/114793/23136/23433/23191/5962/121512/23129/7940/10602/2268/10154	17
512	Mac_T	GO:0015918	sterol transport	17/459	141/18870	6.04241e-08	1.40629e-06	9.13893e-07	348/341/10577/4792/706/4481/302/948/3988/4790/4035/5468/19/54209/4864/114876/55207	17
513	Mac_T	GO:0071675	regulation of mononuclear cell migration	16/459	125/18870	6.34882e-08	1.46987e-06	9.5521e-07	3958/6347/6348/6351/5641/7941/4067/728/6688/8764/29108/1843/1230/719/81704/56833	16
514	Mac_T	GO:0072593	reactive oxygen species metabolic process	22/459	234/18870	6.92651e-08	1.59526e-06	1.0367e-06	7305/54/8870/706/1536/6648/948/3689/4688/3988/2876/4780/5027/1535/55022/3091/6850/7099/64581/6622/4689/8837	22
515	Mac_T	GO:1901136	carbohydrate derivative catabolic process	19/459	178/18870	7.38571e-08	1.69221e-06	1.0997e-06	1471/5144/1514/80896/960/51816/1890/216/3074/25939/55577/2760/2517/4245/2799/3073/313/2717/1116	19
516	Mac_T	GO:0006869	lipid transport	32/459	453/18870	7.69641e-08	1.75431e-06	1.14005e-06	348/5660/341/10577/123/4792/706/4481/302/948/1601/3988/3553/2180/5027/4790/4035/1622/5468/19/2760/54209/6850/5025/950/10087/4864/114876/2170/55207/6696/2171	32
517	Mac_T	GO:2000379	positive regulation of reactive oxygen species metabolic process	12/459	68/18870	7.88153e-08	1.76315e-06	1.1458e-06	7305/706/6648/948/3689/4780/1535/55022/6850/7099/64581/6622	12
518	Mac_T	GO:0031341	regulation of cell killing	15/459	111/18870	7.89471e-08	1.76315e-06	1.1458e-06	7305/3122/3123/3383/6688/3105/5027/3106/3916/966/3133/6850/64581/567/8417	15
519	Mac_T	GO:0032611	interleukin-1 beta production	15/459	111/18870	7.89471e-08	1.76315e-06	1.1458e-06	7305/54/6348/948/5027/140885/11006/54209/1958/1992/29108/8767/7099/64581/4023	15
520	Mac_T	GO:0032651	regulation of interleukin-1 beta production	15/459	111/18870	7.89471e-08	1.76315e-06	1.1458e-06	7305/54/6348/948/5027/140885/11006/54209/1958/1992/29108/8767/7099/64581/4023	15
521	Mac_T	GO:0048143	astrocyte activation	8/459	25/18870	8.6711e-08	1.92218e-06	1.24915e-06	2896/9839/728/3553/4035/712/54209/3459	8
522	Mac_T	GO:0016032	viral process	31/459	432/18870	8.6937e-08	1.92218e-06	1.24915e-06	972/3123/348/6347/6348/1508/3956/3576/6351/1514/7538/3383/3916/8673/440400/4360/8764/2934/8829/4245/975/6355/10410/920/942/950/4864/6482/7879/7392/55207	31
523	Mac_T	GO:0030301	cholesterol transport	16/459	128/18870	8.89485e-08	1.95687e-06	1.27169e-06	348/341/10577/4792/706/4481/302/948/3988/4790/4035/5468/19/54209/4864/55207	16
524	Mac_T	GO:0050671	positive regulation of lymphocyte proliferation	17/459	145/18870	9.15229e-08	2.00354e-06	1.30202e-06	972/3113/3115/3109/3553/3105/3133/3606/4208/6850/975/29108/8767/7099/942/10673/1880	17
525	Mac_T	GO:0032102	negative regulation of response to external stimulus	33/459	481/18870	9.52804e-08	2.07552e-06	1.3488e-06	3123/348/54/6347/2896/928/8870/302/4067/5329/5328/2876/7538/3105/3055/4790/3106/25939/140885/5468/3133/54209/7133/284207/6850/8829/2/1843/11213/313/56833/2268/6696	33
526	Mac_T	GO:0002275	myeloid cell activation involved in immune response	14/459	98/18870	1.05381e-07	2.28429e-06	1.48447e-06	7305/6348/2207/2896/4067/3689/6688/8673/54209/6850/8832/29108/9846/2268	14
527	Mac_T	GO:0098581	detection of external biotic stimulus	8/459	26/18870	1.22598e-07	2.64452e-06	1.71857e-06	3123/23643/3105/3106/7097/54209/7099/64581	8
528	Mac_T	GO:0032946	positive regulation of mononuclear cell proliferation	17/459	148/18870	1.23767e-07	2.65679e-06	1.72655e-06	972/3113/3115/3109/3553/3105/3133/3606/4208/6850/975/29108/8767/7099/942/10673/1880	17
529	Mac_T	GO:0045428	regulation of nitric oxide biosynthetic process	11/459	58/18870	1.27182e-07	2.70384e-06	1.75712e-06	54/706/6648/948/3553/140885/5025/7099/64581/92/2717	11
530	Mac_T	GO:0099024	plasma membrane invagination	11/459	58/18870	1.27182e-07	2.70384e-06	1.75712e-06	4481/948/3689/19/11031/54209/56907/2934/8685/51429/2209	11
531	Mac_T	GO:0070665	positive regulation of leukocyte proliferation	18/459	166/18870	1.28171e-07	2.71183e-06	1.76231e-06	972/3113/3115/3109/4067/3553/3105/3133/3606/4208/6850/975/29108/8767/7099/942/10673/1880	18
532	Mac_T	GO:0002548	monocyte chemotaxis	12/459	71/18870	1.29717e-07	2.73147e-06	1.77507e-06	3958/6347/6348/6351/414062/5641/7941/4067/1843/1230/6355/56833	12
533	Mac_T	GO:0043542	endothelial cell migration	24/459	284/18870	1.33493e-07	2.79311e-06	1.81513e-06	348/2896/9839/5641/2876/4780/8828/5872/5468/8613/90627/3091/4208/6678/8829/5025/6280/5176/23328/3162/54453/23129/2752/28984	24
534	Mac_T	GO:0050866	negative regulation of cell activation	21/459	223/18870	1.33908e-07	2.79311e-06	1.81513e-06	3958/10457/972/7305/3123/348/2896/928/4067/1051/6688/4332/11006/54209/8764/3398/8832/7805/942/7940/2268	21
535	Mac_T	GO:0046634	regulation of alpha-beta T cell activation	15/459	116/18870	1.43057e-07	2.96994e-06	1.93005e-06	3122/3123/9308/3726/3105/11006/3133/3606/8764/6850/64332/975/8767/942/639	15
536	Mac_T	GO:0006801	superoxide metabolic process	12/459	72/18870	1.52274e-07	3.11665e-06	2.02539e-06	7305/54/1536/6648/948/3689/4688/4780/1535/6850/64581/4689	12
537	Mac_T	GO:0046635	positive regulation of alpha-beta T cell activation	12/459	72/18870	1.52274e-07	3.11665e-06	2.02539e-06	3122/3123/9308/3105/11006/3133/3606/6850/64332/975/8767/942	12
538	Mac_T	GO:0050766	positive regulation of phagocytosis	12/459	72/18870	1.52274e-07	3.11665e-06	2.02539e-06	6347/2207/948/3553/1535/140885/11031/54209/5795/29108/64581/2209	12
539	Mac_T	GO:0002886	regulation of myeloid leukocyte mediated immunity	11/459	59/18870	1.52943e-07	3.11665e-06	2.02539e-06	7305/4067/3689/6688/8673/3133/6850/8832/9846/2209/2268	11
540	Mac_T	GO:0032755	positive regulation of interleukin-6 production	14/459	101/18870	1.55032e-07	3.14473e-06	2.04364e-06	972/7305/948/3553/5027/1535/7097/6850/29108/8767/7099/64581/4023/81622	14
541	Mac_T	GO:2001233	regulation of apoptotic signaling pathway	29/459	398/18870	1.65756e-07	3.34691e-06	2.17503e-06	3958/1520/972/1512/8870/6648/26471/1514/5329/4318/960/2876/3553/3383/4780/1075/54209/3091/8829/29108/6280/7099/3162/1513/2907/1687/7009/4000/8837	29
542	Mac_T	GO:0052548	regulation of endopeptidase activity	24/459	288/18870	1.7317e-07	3.46497e-06	2.25175e-06	1471/1509/5641/4067/5329/4318/960/2876/7077/831/1612/5468/6850/2934/1992/29108/6280/5176/7805/8767/64581/6622/444/5269	24
543	Mac_T	GO:1903532	positive regulation of secretion by cell	24/459	288/18870	1.7317e-07	3.46497e-06	2.25175e-06	3123/302/3689/1601/3553/6386/5027/6281/3916/8673/5468/8564/7097/54209/3091/6850/5025/7099/6622/9846/2268/7879/6696/28984	24
544	Mac_T	GO:0048708	astrocyte differentiation	13/459	87/18870	1.75428e-07	3.49435e-06	2.27084e-06	2896/9839/7431/728/3553/4035/712/8613/54209/3398/6280/7099/3459	13
545	Mac_T	GO:0051047	positive regulation of secretion	25/459	310/18870	1.79642e-07	3.56222e-06	2.31495e-06	3123/302/3689/1601/3553/6386/5027/1535/6281/3916/8673/5468/8564/7097/54209/3091/6850/5025/7099/6622/9846/2268/7879/6696/28984	25
546	Mac_T	GO:0042060	wound healing	30/459	423/18870	1.81833e-07	3.585e-06	2.32975e-06	348/2207/928/5341/302/948/4067/308/5329/5328/960/2876/4780/79026/84034/6281/5468/966/8613/3091/6850/5912/7099/4853/3162/64581/2683/83478/8837/55207	30
547	Mac_T	GO:0002763	positive regulation of myeloid leukocyte differentiation	11/459	60/18870	1.83222e-07	3.585e-06	2.32975e-06	972/7305/3123/2353/54209/3398/677/4853/1230/920/2124	11
548	Mac_T	GO:0080164	regulation of nitric oxide metabolic process	11/459	60/18870	1.83222e-07	3.585e-06	2.32975e-06	54/706/6648/948/3553/140885/5025/7099/64581/92/2717	11
549	Mac_T	GO:0002861	regulation of inflammatory response to antigenic stimulus	10/459	48/18870	1.87961e-07	3.66151e-06	2.37947e-06	3123/4067/2876/3055/3133/54209/6850/975/2209/2268	10
550	Mac_T	GO:1905517	macrophage migration	11/459	61/18870	2.18692e-07	4.24148e-06	2.75637e-06	3958/6347/6348/928/728/54209/5025/975/719/2683/56833	11
551	Mac_T	GO:0050920	regulation of chemotaxis	21/459	232/18870	2.61223e-07	5.03305e-06	3.27078e-06	972/6347/6348/3576/6351/5641/7941/4067/728/6688/54209/8829/5025/7423/1843/1230/719/23075/4354/56833/1880	21
552	Mac_T	GO:0071453	cellular response to oxygen levels	18/459	174/18870	2.61783e-07	5.03305e-06	3.27078e-06	1536/2353/4780/5468/537/54209/3091/10533/1958/677/3162/9114/523/7009/4000/8837/80315/28984	18
553	Mac_T	GO:0070098	chemokine-mediated signaling pathway	13/459	91/18870	3.0092e-07	5.76048e-06	3.74351e-06	6347/6348/3576/6351/414062/2920/2921/4067/54209/3091/1230/6355/2919	13
554	Mac_T	GO:0140895	cell surface toll-like receptor signaling pathway	11/459	63/18870	3.08309e-07	5.87647e-06	3.81889e-06	4792/929/4067/23643/1535/4814/118788/7097/54209/8767/7099	11
555	Mac_T	GO:2000116	regulation of cysteine-type endopeptidase activity	19/459	195/18870	3.12616e-07	5.93299e-06	3.85562e-06	1471/1509/5641/5329/4318/960/2876/831/1612/5468/6850/2934/29108/6280/7805/8767/64581/6622/444	19
556	Mac_T	GO:0032729	positive regulation of type II interferon production	12/459	77/18870	3.26319e-07	6.16659e-06	4.00743e-06	3113/3115/929/5144/3553/3105/3606/3394/29108/8767/7099/64581	12
557	Mac_T	GO:0019058	viral life cycle	25/459	321/18870	3.47532e-07	6.51181e-06	4.23177e-06	972/3123/348/6347/1508/3956/3576/1514/3383/3916/8673/440400/4360/8764/2934/8829/975/6355/10410/920/942/950/4864/7879/55207	25
558	Mac_T	GO:0031348	negative regulation of defense response	25/459	321/18870	3.47532e-07	6.51181e-06	4.23177e-06	3123/348/54/2896/8870/4067/2876/7538/3105/3055/4790/3106/25939/140885/5468/3133/54209/7133/284207/6850/2/11213/313/56833/2268	25
559	Mac_T	GO:0051651	maintenance of location in cell	21/459	237/18870	3.72967e-07	6.9589e-06	4.52232e-06	2512/348/2495/6348/706/4067/5144/5027/1535/6546/3074/5552/2760/2934/400916/6280/805/920/6622/3073/55704	21
560	Mac_T	GO:0046209	nitric oxide metabolic process	12/459	78/18870	3.77265e-07	7.00953e-06	4.55522e-06	54/706/6648/948/3553/140885/7097/5025/7099/64581/92/2717	12
561	Mac_T	GO:0002449	lymphocyte mediated immunity	27/459	368/18870	3.88209e-07	7.18267e-06	4.66774e-06	972/3122/3123/2207/1512/3553/3383/3105/5027/712/3106/3916/11006/3133/1075/54209/7133/3606/64332/975/567/23075/8417/57823/2209/81622/55207	27
562	Mac_T	GO:0090382	phagosome maturation	8/459	30/18870	4.21648e-07	7.76886e-06	5.04868e-06	5027/10981/11031/55647/285195/56833/7879/55207	8
563	Mac_T	GO:0032613	interleukin-10 production	11/459	65/18870	4.28952e-07	7.83811e-06	5.09368e-06	7305/3123/54502/9308/11006/7097/54209/6850/29108/7099/64581	11
564	Mac_T	GO:0032653	regulation of interleukin-10 production	11/459	65/18870	4.28952e-07	7.83811e-06	5.09368e-06	7305/3123/54502/9308/11006/7097/54209/6850/29108/7099/64581	11
565	Mac_T	GO:2001057	reactive nitrogen species metabolic process	12/459	79/18870	4.35165e-07	7.91893e-06	5.1462e-06	54/706/6648/948/3553/140885/7097/5025/7099/64581/92/2717	12
566	Mac_T	GO:0150077	regulation of neuroinflammatory response	9/459	41/18870	4.83732e-07	8.76666e-06	5.69711e-06	6348/2896/26471/4318/3553/1075/54209/7133/3606	9
567	Mac_T	GO:1901653	cellular response to peptide	27/459	374/18870	5.33575e-07	9.63049e-06	6.25848e-06	1509/5641/948/7431/2203/4067/2353/3553/3383/4780/55022/4790/4035/5872/5468/11031/54209/23433/490/9518/23191/5791/677/8767/7099/8837/4644	27
568	Mac_T	GO:0050728	negative regulation of inflammatory response	19/459	202/18870	5.39735e-07	9.70206e-06	6.30499e-06	3123/348/54/2896/8870/4067/2876/7538/3055/4790/140885/5468/54209/7133/284207/6850/313/56833/2268	19
569	Mac_T	GO:0031667	response to nutrient levels	32/459	495/18870	5.64047e-07	1.0098e-05	6.56233e-06	348/968/9839/123/8942/706/1536/6648/2203/2353/3988/2876/7538/2180/4780/9462/5468/19/3920/9518/10533/11337/2/64332/4023/1513/5337/2752/2350/7392/80315/6696	32
570	Mac_T	GO:2000377	regulation of reactive oxygen species metabolic process	16/459	147/18870	6.08476e-07	1.08495e-05	7.05068e-06	7305/54/8870/706/6648/948/3689/4780/1535/55022/3091/6850/7099/64581/6622/8837	16
571	Mac_T	GO:0032612	interleukin-1 production	15/459	130/18870	6.43918e-07	1.13295e-05	7.36258e-06	7305/54/6348/948/5027/140885/11006/54209/1958/1992/29108/8767/7099/64581/4023	15
572	Mac_T	GO:0032652	regulation of interleukin-1 production	15/459	130/18870	6.43918e-07	1.13295e-05	7.36258e-06	7305/54/6348/948/5027/140885/11006/54209/1958/1992/29108/8767/7099/64581/4023	15
573	Mac_T	GO:0050864	regulation of B cell activation	15/459	130/18870	6.43918e-07	1.13295e-05	7.36258e-06	972/7305/4067/6688/4332/4208/6850/3398/677/975/7805/7099/10673/56833/1880	15
574	Mac_T	GO:0016485	protein processing	21/459	245/18870	6.45641e-07	1.13295e-05	7.36258e-06	1520/1522/1512/302/5641/7941/1514/5329/5328/9935/1368/5027/831/6281/5552/2934/10159/8767/81502/6196/444	21
575	Mac_T	GO:0050851	antigen receptor-mediated signaling pathway	19/459	205/18870	6.76786e-07	1.1829e-05	7.68723e-06	3958/3123/4792/3115/3119/4067/5144/3988/3105/4332/4790/11006/4208/6850/5795/64332/975/7805/8767	19
576	Mac_T	GO:0032735	positive regulation of interleukin-12 production	9/459	43/18870	7.45746e-07	1.2983e-05	8.43716e-06	948/7097/6850/3394/7805/8767/7099/64581/81622	9
577	Mac_T	GO:0001912	positive regulation of leukocyte mediated cytotoxicity	11/459	69/18870	8.00839e-07	1.37794e-05	8.9547e-06	7305/3122/3123/6688/3105/5027/3106/3916/3133/567/8417	11
578	Mac_T	GO:0002711	positive regulation of T cell mediated immunity	11/459	69/18870	8.00839e-07	1.37794e-05	8.9547e-06	3122/3123/3553/3105/5027/3106/3133/3606/975/567/8417	11
579	Mac_T	GO:0045670	regulation of osteoclast differentiation	11/459	69/18870	8.00839e-07	1.37794e-05	8.9547e-06	7305/6348/2353/1051/9935/4286/11006/54209/7099/4853/1230	11
580	Mac_T	GO:0002709	regulation of T cell mediated immunity	13/459	99/18870	8.13845e-07	1.39489e-05	9.06486e-06	3122/3123/3553/3105/5027/3106/11006/3133/7133/3606/975/567/8417	13
581	Mac_T	GO:0043086	negative regulation of catalytic activity	31/459	480/18870	8.68247e-07	1.47669e-05	9.59642e-06	3958/1471/348/341/1476/4067/5329/4318/960/2876/3553/7538/7077/4790/831/4035/6546/11006/5468/1475/5795/1992/29108/5176/1843/5962/6622/11213/7009/5269/2717	31
582	Mac_T	GO:0050673	epithelial cell proliferation	31/459	480/18870	8.68247e-07	1.47669e-05	9.59642e-06	348/6347/2896/9839/26471/728/1601/3988/2876/1051/7538/8828/283131/5468/3091/4208/6678/8829/3398/64332/677/1992/5176/7423/4853/3162/567/2683/92/8837/28984	31
583	Mac_T	GO:0002752	cell surface pattern recognition receptor signaling pathway	11/459	70/18870	9.29604e-07	1.57498e-05	1.02352e-05	4792/929/4067/23643/1535/4814/118788/7097/54209/8767/7099	11
584	Mac_T	GO:0010743	regulation of macrophage derived foam cell differentiation	8/459	33/18870	9.38123e-07	1.58335e-05	1.02896e-05	4792/4481/948/4790/5468/19/3606/4023	8
585	Mac_T	GO:0060907	positive regulation of macrophage cytokine production	7/459	24/18870	1.16398e-06	1.95708e-05	1.27183e-05	972/948/5027/29108/7805/8767/7099	7
586	Mac_T	GO:0007584	response to nutrient	16/459	155/18870	1.24421e-06	2.08405e-05	1.35434e-05	8942/706/1536/6648/3988/2876/2180/5468/19/2/64332/4023/5337/2350/7392/6696	16
587	Mac_T	GO:0007015	actin filament organization	30/459	464/18870	1.27798e-06	2.13253e-05	1.38585e-05	4082/9839/5341/822/3055/93663/4643/6281/6050/56907/23433/342184/23191/2934/8829/10095/221692/283431/57698/29108/5962/4542/23075/8826/7791/51429/55704/10602/4644/28984	30
588	Mac_T	GO:0045639	positive regulation of myeloid cell differentiation	13/459	103/18870	1.28934e-06	2.1434e-05	1.39291e-05	972/7305/3123/2353/54209/3091/3398/677/4853/1230/920/2124/92	13
589	Mac_T	GO:0097401	synaptic vesicle lumen acidification	6/459	16/18870	1.30527e-06	2.16177e-05	1.40485e-05	537/9296/10159/526/9114/523	6
590	Mac_T	GO:0031638	zymogen activation	10/459	59/18870	1.42151e-06	2.34036e-05	1.52091e-05	1522/1512/302/5641/1514/5329/5328/6281/8767/444	10
591	Mac_T	GO:0002221	pattern recognition receptor signaling pathway	20/459	236/18870	1.42369e-06	2.34036e-05	1.52091e-05	1520/4792/929/948/4067/23643/1535/4814/55577/118788/7097/54209/64332/29108/144811/8767/7099/51296/11213/81622	20
592	Mac_T	GO:0006809	nitric oxide biosynthetic process	11/459	73/18870	1.43175e-06	2.34489e-05	1.52385e-05	54/706/6648/948/3553/140885/5025/7099/64581/92/2717	11
593	Mac_T	GO:0061081	positive regulation of myeloid leukocyte cytokine production involved in immune response	8/459	35/18870	1.52378e-06	2.48641e-05	1.61582e-05	972/948/5027/6850/29108/7805/8767/7099	8
594	Mac_T	GO:0010631	epithelial cell migration	26/459	372/18870	1.5905e-06	2.58573e-05	1.68036e-05	348/2896/9839/1512/5641/4318/2876/4780/8828/5872/5468/8613/90627/3091/4208/6678/8829/5025/6280/5176/23328/3162/54453/23129/2752/28984	26
595	Mac_T	GO:0042102	positive regulation of T cell proliferation	13/459	105/18870	1.60922e-06	2.60658e-05	1.69392e-05	3113/3115/3109/3553/3105/3133/3606/6850/975/29108/8767/942/10673	13
596	Mac_T	GO:0045765	regulation of angiogenesis	25/459	349/18870	1.62349e-06	2.61106e-05	1.69682e-05	10457/2896/3576/1512/1536/3687/728/3553/4780/84034/4814/5468/6050/3091/6678/8829/5176/7423/23328/3162/719/23129/2752/1116/28984	25
597	Mac_T	GO:0021782	glial cell development	14/459	122/18870	1.62379e-06	2.61106e-05	1.69682e-05	2896/9839/7431/4067/728/3553/4035/712/7097/54209/6280/9334/7099/3459	14
598	Mac_T	GO:0046637	regulation of alpha-beta T cell differentiation	11/459	74/18870	1.6454e-06	2.63621e-05	1.71317e-05	3122/3123/9308/3726/11006/3606/6850/64332/8767/942/639	11
599	Mac_T	GO:0043300	regulation of leukocyte degranulation	9/459	47/18870	1.65311e-06	2.63901e-05	1.71499e-05	4067/3689/6688/3916/8673/6850/8832/9846/2268	9
600	Mac_T	GO:0001913	T cell mediated cytotoxicity	10/459	60/18870	1.66916e-06	2.64553e-05	1.71923e-05	3122/3123/1512/3105/5027/3106/3133/1075/567/8417	10
601	Mac_T	GO:0061462	protein localization to lysosome	10/459	60/18870	1.66916e-06	2.64553e-05	1.71923e-05	9765/64747/3920/975/7805/4074/950/7879/84572/112770	10
602	Mac_T	GO:0002286	T cell activation involved in immune response	14/459	123/18870	1.79228e-06	2.83053e-05	1.83945e-05	3958/972/3122/3123/2207/3109/3383/3726/3606/64332/975/8767/942/1880	14
603	Mac_T	GO:0090132	epithelium migration	26/459	375/18870	1.84576e-06	2.90461e-05	1.88759e-05	348/2896/9839/1512/5641/4318/2876/4780/8828/5872/5468/8613/90627/3091/4208/6678/8829/5025/6280/5176/23328/3162/54453/23129/2752/28984	26
604	Mac_T	GO:0034134	toll-like receptor 2 signaling pathway	6/459	17/18870	1.97589e-06	3.09836e-05	2.0135e-05	4067/1535/118788/7097/54209/8767	6
605	Mac_T	GO:0030217	T cell differentiation	23/459	307/18870	1.99366e-06	3.11518e-05	2.02444e-05	972/3122/3123/2207/9308/1514/3988/3553/9935/6688/3726/11006/3606/6850/1958/64332/677/8767/920/942/567/1880/639	23
606	Mac_T	GO:0097006	regulation of plasma lipoprotein particle levels	12/459	91/18870	2.05992e-06	3.20738e-05	2.08435e-05	348/341/4481/302/7941/948/3988/4043/19/54209/3162/4023	12
607	Mac_T	GO:1901342	regulation of vasculature development	25/459	354/18870	2.09759e-06	3.25458e-05	2.11502e-05	10457/2896/3576/1512/1536/3687/728/3553/4780/84034/4814/5468/6050/3091/6678/8829/5176/7423/23328/3162/719/23129/2752/1116/28984	25
608	Mac_T	GO:0046631	alpha-beta T cell activation	17/459	181/18870	2.17521e-06	3.34232e-05	2.17204e-05	3122/3123/9308/1514/3726/3105/11006/3133/3606/8764/6850/64332/975/8767/942/1880/639	17
609	Mac_T	GO:0002698	negative regulation of immune effector process	14/459	125/18870	2.17682e-06	3.34232e-05	2.17204e-05	3958/54/2896/6688/3105/3106/11006/966/3133/2/8832/11213/56833/7009	14
610	Mac_T	GO:0006690	icosanoid metabolic process	14/459	125/18870	2.17682e-06	3.34232e-05	2.17204e-05	972/11343/2876/3553/7097/6850/29108/4048/2681/4259/6916/26090/2879/2171	14
611	Mac_T	GO:0032731	positive regulation of interleukin-1 beta production	10/459	62/18870	2.27923e-06	3.48746e-05	2.26637e-05	7305/6348/948/5027/1958/29108/8767/7099/64581/4023	10
612	Mac_T	GO:0002695	negative regulation of leukocyte activation	18/459	202/18870	2.34209e-06	3.57128e-05	2.32083e-05	3958/10457/972/7305/3123/2896/4067/1051/6688/4332/11006/8764/3398/8832/7805/942/7940/2268	18
613	Mac_T	GO:0090130	tissue migration	26/459	380/18870	2.35614e-06	3.58036e-05	2.32673e-05	348/2896/9839/1512/5641/4318/2876/4780/8828/5872/5468/8613/90627/3091/4208/6678/8829/5025/6280/5176/23328/3162/54453/23129/2752/28984	26
614	Mac_T	GO:0006911	phagocytosis, engulfment	9/459	49/18870	2.38725e-06	3.60288e-05	2.34137e-05	4481/948/3689/19/11031/54209/2934/8685/2209	9
615	Mac_T	GO:0036230	granulocyte activation	9/459	49/18870	2.38725e-06	3.60288e-05	2.34137e-05	7305/6348/2207/2896/3576/3689/6688/3606/6850	9
616	Mac_T	GO:0050921	positive regulation of chemotaxis	15/459	145/18870	2.59908e-06	3.90923e-05	2.54045e-05	972/6348/3576/6351/5641/7941/728/6688/54209/8829/5025/7423/1230/719/23075	15
617	Mac_T	GO:0032623	interleukin-2 production	10/459	63/18870	2.65111e-06	3.9472e-05	2.56513e-05	5144/9308/3553/7538/11006/7805/8767/64581/920/942	10
618	Mac_T	GO:0032663	regulation of interleukin-2 production	10/459	63/18870	2.65111e-06	3.9472e-05	2.56513e-05	5144/9308/3553/7538/11006/7805/8767/64581/920/942	10
619	Mac_T	GO:0032757	positive regulation of interleukin-8 production	10/459	63/18870	2.65111e-06	3.9472e-05	2.56513e-05	972/929/3553/7097/6850/29108/7099/64581/965/1116	10
620	Mac_T	GO:0072659	protein localization to plasma membrane	22/459	290/18870	2.71245e-06	4.02499e-05	2.61568e-05	3958/115548/1601/8878/55022/4035/6281/8673/5872/23136/11031/537/54209/23433/975/481/8650/5962/8417/55704/7879/4644	22
621	Mac_T	GO:0048771	tissue remodeling	17/459	184/18870	2.72606e-06	4.03165e-05	2.62001e-05	10457/1471/54/3988/4286/5027/4790/5468/3091/3606/4208/6850/1200/4853/1513/7879/6696	17
622	Mac_T	GO:0045921	positive regulation of exocytosis	11/459	78/18870	2.80595e-06	4.13598e-05	2.68781e-05	302/3689/6386/6281/3916/8673/6850/6622/9846/2268/7879	11
623	Mac_T	GO:0150078	positive regulation of neuroinflammatory response	6/459	18/18870	2.90309e-06	4.26494e-05	2.77162e-05	6348/26471/3553/1075/54209/3606	6
624	Mac_T	GO:0045766	positive regulation of angiogenesis	17/459	185/18870	2.93584e-06	4.28459e-05	2.78438e-05	2896/3576/1512/1536/3687/728/3553/4780/84034/4814/3091/8829/7423/23328/3162/719/1116	17
625	Mac_T	GO:1904018	positive regulation of vasculature development	17/459	185/18870	2.93584e-06	4.28459e-05	2.78438e-05	2896/3576/1512/1536/3687/728/3553/4780/84034/4814/3091/8829/7423/23328/3162/719/1116	17
626	Mac_T	GO:0002335	mature B cell differentiation	8/459	38/18870	2.96984e-06	4.31994e-05	2.80736e-05	3956/6688/3394/64332/4853/56833/6482/1880	8
627	Mac_T	GO:0042063	gliogenesis	24/459	338/18870	3.05471e-06	4.42882e-05	2.87812e-05	6347/6348/2896/928/9839/706/7431/4067/728/3553/4035/712/3074/8613/7097/54209/7133/3398/5025/6280/9334/7099/3459/1880	24
628	Mac_T	GO:0002708	positive regulation of lymphocyte mediated immunity	14/459	129/18870	3.17325e-06	4.58566e-05	2.98004e-05	3122/3123/3553/3105/5027/3106/3916/3133/54209/3606/975/567/8417/2209	14
629	Mac_T	GO:0038061	non-canonical NF-kappaB signal transduction	15/459	148/18870	3.3588e-06	4.83799e-05	3.14402e-05	4792/9516/3553/6688/4790/7097/54209/3606/29108/7805/23328/7099/942/3987/1116	15
630	Mac_T	GO:0001910	regulation of leukocyte mediated cytotoxicity	12/459	96/18870	3.65475e-06	5.23019e-05	3.3989e-05	7305/3122/3123/3383/6688/3105/5027/3106/3916/3133/567/8417	12
631	Mac_T	GO:0002690	positive regulation of leukocyte chemotaxis	12/459	96/18870	3.65475e-06	5.23019e-05	3.3989e-05	972/6348/3576/6351/5641/7941/728/6688/7423/1230/719/23075	12
632	Mac_T	GO:0051924	regulation of calcium ion transport	20/459	251/18870	3.67399e-06	5.24077e-05	3.40577e-05	3958/6347/6348/6351/706/4067/5144/79026/5027/1535/6546/490/5025/8832/481/805/1230/920/6622/7009	20
633	Mac_T	GO:1901222	regulation of non-canonical NF-kappaB signal transduction	13/459	113/18870	3.71015e-06	5.27534e-05	3.42823e-05	4792/9516/3553/6688/7097/54209/3606/29108/7805/23328/7099/942/3987	13
634	Mac_T	GO:0007034	vacuolar transport	16/459	169/18870	3.89472e-06	5.52002e-05	3.58724e-05	5660/2896/3988/8878/4035/9765/3916/3920/7805/4074/9114/950/4864/7879/55207/84572	16
635	Mac_T	GO:0046638	positive regulation of alpha-beta T cell differentiation	9/459	52/18870	4.00757e-06	5.66182e-05	3.67939e-05	3122/3123/9308/11006/3606/6850/64332/8767/942	9
636	Mac_T	GO:0010594	regulation of endothelial cell migration	19/459	231/18870	4.04469e-06	5.69606e-05	3.70164e-05	348/2896/5641/4780/8828/5468/8613/90627/3091/4208/6678/8829/5025/5176/23328/3162/54453/2752/28984	19
637	Mac_T	GO:0043299	leukocyte degranulation	11/459	81/18870	4.09626e-06	5.75037e-05	3.73694e-05	6348/4067/3689/6688/3055/3916/8673/6850/8832/9846/2268	11
638	Mac_T	GO:0010885	regulation of cholesterol storage	6/459	19/18870	4.15607e-06	5.77929e-05	3.75573e-05	4481/948/5468/19/54209/4023	6
639	Mac_T	GO:0070431	nucleotide-binding oligomerization domain containing 2 signaling pathway	6/459	19/18870	4.15607e-06	5.77929e-05	3.75573e-05	4792/55577/144811/8767/7099/51296	6
640	Mac_T	GO:0098543	detection of other organism	6/459	19/18870	4.15607e-06	5.77929e-05	3.75573e-05	3123/3105/3106/7097/7099/64581	6
641	Mac_T	GO:0001916	positive regulation of T cell mediated cytotoxicity	8/459	40/18870	4.47531e-06	6.18433e-05	4.01895e-05	3122/3123/3105/5027/3106/3133/567/8417	8
642	Mac_T	GO:0010742	macrophage derived foam cell differentiation	8/459	40/18870	4.47531e-06	6.18433e-05	4.01895e-05	4792/4481/948/4790/5468/19/3606/4023	8
643	Mac_T	GO:0010821	regulation of mitochondrion organization	15/459	152/18870	4.67845e-06	6.44489e-05	4.18828e-05	8870/706/5329/4318/2876/8878/55022/5468/54209/3091/56907/400916/29108/10493/4000	15
644	Mac_T	GO:0007249	canonical NF-kappaB signal transduction	22/459	300/18870	4.70087e-06	6.45566e-05	4.19528e-05	972/3123/3956/4792/9516/948/3553/8878/6275/4790/140885/11006/7097/54209/10010/29108/8767/7099/3162/64581/920/8837	22
645	Mac_T	GO:0007041	lysosomal transport	14/459	134/18870	4.97766e-06	6.81461e-05	4.42855e-05	5660/2896/3988/4035/9765/3916/3920/7805/4074/950/4864/7879/55207/84572	14
646	Mac_T	GO:0006887	exocytosis	24/459	349/18870	5.28951e-06	7.2192e-05	4.69148e-05	6348/7127/5341/302/4067/3689/6386/6688/3055/5027/6281/3916/8673/5872/11031/6850/8832/1230/6355/6622/9846/2268/7879/55207	24
647	Mac_T	GO:0090077	foam cell differentiation	8/459	41/18870	5.44297e-06	7.40579e-05	4.81273e-05	4792/4481/948/4790/5468/19/3606/4023	8
648	Mac_T	GO:0010883	regulation of lipid storage	9/459	54/18870	5.54868e-06	7.52647e-05	4.89115e-05	123/4792/4481/948/4790/5468/19/54209/4023	9
649	Mac_T	GO:1902905	positive regulation of supramolecular fiber organization	16/459	175/18870	6.11371e-06	8.26752e-05	5.37274e-05	348/5341/2876/3055/6281/342184/23191/2934/8829/29108/9659/23075/51429/55704/10602/28984	16
650	Mac_T	GO:1901224	positive regulation of non-canonical NF-kappaB signal transduction	10/459	69/18870	6.19262e-06	8.34871e-05	5.4255e-05	3553/7097/54209/3606/29108/7805/23328/7099/942/3987	10
651	Mac_T	GO:0010466	negative regulation of peptidase activity	14/459	137/18870	6.45351e-06	8.67399e-05	5.63688e-05	1471/1476/5329/4318/960/2876/7077/831/4035/1475/1992/5176/6622/5269	14
652	Mac_T	GO:0034142	toll-like receptor 4 signaling pathway	9/459	55/18870	6.49307e-06	8.67442e-05	5.63717e-05	4792/929/4067/23643/4814/118788/54209/8767/7099	9
653	Mac_T	GO:0034381	plasma lipoprotein particle clearance	9/459	55/18870	6.49307e-06	8.67442e-05	5.63717e-05	348/341/4481/302/948/3988/4043/54209/3162	9
654	Mac_T	GO:0032733	positive regulation of interleukin-10 production	8/459	42/18870	6.5819e-06	8.74029e-05	5.67997e-05	54502/9308/7097/54209/6850/29108/7099/64581	8
655	Mac_T	GO:0042119	neutrophil activation	8/459	42/18870	6.5819e-06	8.74029e-05	5.67997e-05	7305/2207/2896/3576/3689/6688/3606/6850	8
656	Mac_T	GO:0043087	regulation of GTPase activity	22/459	307/18870	6.80019e-06	9.00312e-05	5.85078e-05	6347/6348/6351/414062/153020/9236/6281/23179/58504/6355/5962/29/55357/55803/121512/23129/81704/51429/25780/83478/3987/10154	22
657	Mac_T	GO:0051346	negative regulation of hydrolase activity	18/459	218/18870	6.85841e-06	9.0531e-05	5.88326e-05	3958/1471/341/1476/5329/4318/960/2876/7077/831/4035/1475/1992/5176/5962/6622/7009/5269	18
658	Mac_T	GO:0090322	regulation of superoxide metabolic process	7/459	31/18870	7.6314e-06	0.000100435	6.52685e-05	7305/54/948/3689/4780/6850/64581	7
659	Mac_T	GO:0006022	aminoglycan metabolic process	13/459	121/18870	7.95183e-06	0.000104341	6.78073e-05	9956/960/3553/4790/3074/2517/9334/2799/3073/10678/6482/10402/1116	13
660	Mac_T	GO:0072665	protein localization to vacuole	11/459	88/18870	9.28237e-06	0.00012144	7.8919e-05	8878/9765/64747/3920/975/7805/4074/950/7879/84572/112770	11
661	Mac_T	GO:2000516	positive regulation of CD4-positive, alpha-beta T cell activation	8/459	44/18870	9.47107e-06	0.000123543	8.02858e-05	3122/3123/9308/3606/64332/975/8767/942	8
662	Mac_T	GO:0002313	mature B cell differentiation involved in immune response	7/459	32/18870	9.5649e-06	0.000124035	8.06055e-05	3956/6688/3394/64332/4853/6482/1880	7
663	Mac_T	GO:0019883	antigen processing and presentation of endogenous antigen	7/459	32/18870	9.5649e-06	0.000124035	8.06055e-05	972/3122/3123/3105/3106/3133/567	7
664	Mac_T	GO:0032732	positive regulation of interleukin-1 production	10/459	73/18870	1.03759e-05	0.000133378	8.66771e-05	7305/6348/948/5027/1958/29108/8767/7099/64581/4023	10
665	Mac_T	GO:0033344	cholesterol efflux	10/459	73/18870	1.03759e-05	0.000133378	8.66771e-05	348/341/10577/4792/3988/4035/5468/19/54209/4864	10
666	Mac_T	GO:0071677	positive regulation of mononuclear cell migration	10/459	73/18870	1.03759e-05	0.000133378	8.66771e-05	3958/6348/6351/5641/7941/6688/8764/29108/1230/81704	10
667	Mac_T	GO:0046632	alpha-beta T cell differentiation	13/459	124/18870	1.04076e-05	0.000133399	8.66906e-05	3122/3123/9308/1514/3726/11006/3606/6850/64332/8767/942/1880/639	13
668	Mac_T	GO:0022604	regulation of cell morphogenesis	19/459	247/18870	1.06281e-05	0.000135831	8.8271e-05	6347/6348/3689/960/3055/93663/3074/114793/23136/23433/6678/23191/5962/121512/23129/7940/10602/2268/10154	19
669	Mac_T	GO:0042176	regulation of protein catabolic process	24/459	364/18870	1.07366e-05	0.000136822	8.89151e-05	1471/348/8870/302/26471/1601/2876/3553/4780/7077/4035/5476/54209/7133/10533/11337/975/5962/6622/11213/2272/51429/255488/7879	24
670	Mac_T	GO:1905521	regulation of macrophage migration	8/459	45/18870	1.12762e-05	0.000143285	9.31155e-05	6348/928/728/54209/5025/975/719/56833	8
671	Mac_T	GO:0002862	negative regulation of inflammatory response to antigenic stimulus	7/459	33/18870	1.18875e-05	0.000149762	9.73245e-05	3123/4067/2876/3055/54209/6850/2268	7
672	Mac_T	GO:0006622	protein targeting to lysosome	7/459	33/18870	1.18875e-05	0.000149762	9.73245e-05	9765/3920/7805/4074/950/7879/84572	7
673	Mac_T	GO:0038094	Fc-gamma receptor signaling pathway	7/459	33/18870	1.18875e-05	0.000149762	9.73245e-05	2207/4067/3055/6850/5795/2209/2268	7
674	Mac_T	GO:0010632	regulation of epithelial cell migration	21/459	295/18870	1.21496e-05	0.000152629	9.91874e-05	348/2896/1512/5641/4318/4780/8828/5468/8613/90627/3091/4208/6678/8829/5025/5176/23328/3162/54453/2752/28984	21
675	Mac_T	GO:0070482	response to oxygen levels	23/459	343/18870	1.24867e-05	0.000156419	0.000101651	9839/1536/6648/2353/5328/4780/5468/537/7097/54209/3091/10533/1958/677/7423/3162/9114/523/7009/4000/8837/80315/28984	23
676	Mac_T	GO:0045646	regulation of erythrocyte differentiation	8/459	46/18870	1.33626e-05	0.000166919	0.000108474	4067/7538/9935/6688/3091/677/567/92	8
677	Mac_T	GO:0009743	response to carbohydrate	18/459	230/18870	1.43166e-05	0.000178332	0.000115891	3123/6648/2203/4067/2876/3553/3383/9462/54209/3091/1958/677/5176/64581/4023/2752/6196/4199	18
678	Mac_T	GO:0032743	positive regulation of interleukin-2 production	7/459	34/18870	1.46581e-05	0.000181563	0.000117991	5144/9308/3553/8767/64581/920/942	7
679	Mac_T	GO:0043372	positive regulation of CD4-positive, alpha-beta T cell differentiation	7/459	34/18870	1.46581e-05	0.000181563	0.000117991	3122/3123/9308/3606/64332/8767/942	7
680	Mac_T	GO:0002444	myeloid leukocyte mediated immunity	12/459	110/18870	1.51421e-05	0.000186784	0.000121383	7305/6348/4067/3689/6688/8673/3133/6850/8832/9846/2209/2268	12
681	Mac_T	GO:0002706	regulation of lymphocyte mediated immunity	16/459	188/18870	1.5164e-05	0.000186784	0.000121383	3122/3123/3553/3105/5027/3106/3916/11006/3133/54209/7133/3606/975/567/8417/2209	16
682	Mac_T	GO:0046456	icosanoid biosynthetic process	9/459	61/18870	1.55657e-05	0.000191198	0.000124252	972/3553/6850/29108/4048/2681/4259/6916/2171	9
683	Mac_T	GO:0019722	calcium-mediated signaling	17/459	210/18870	1.59363e-05	0.000195209	0.000126858	6348/3576/5341/6351/79772/5027/6546/54209/6850/5025/5795/481/805/64581/1230/920/51643	17
684	Mac_T	GO:2001056	positive regulation of cysteine-type endopeptidase activity	13/459	129/18870	1.60005e-05	0.000195454	0.000127018	1509/5641/1612/5468/6850/2934/29108/6280/7805/8767/64581/6622/444	13
685	Mac_T	GO:0043523	regulation of neuron apoptotic process	18/459	232/18870	1.60995e-05	0.000196121	0.000127451	348/6347/6348/2896/5641/6648/26471/1051/7832/54209/3091/4208/8829/1958/6622/23129/51643/80315	18
686	Mac_T	GO:0051402	neuron apoptotic process	20/459	278/18870	1.67604e-05	0.000203612	0.000132319	348/6347/6348/2896/5641/6648/26471/2876/1051/7832/54209/3091/4208/8829/1958/6622/23129/51643/7009/80315	20
687	Mac_T	GO:0051250	negative regulation of lymphocyte activation	15/459	169/18870	1.69617e-05	0.000205492	0.000133541	3958/10457/972/7305/3123/4067/1051/4332/11006/8764/3398/7805/942/7940/2268	15
688	Mac_T	GO:0032633	interleukin-4 production	7/459	35/18870	1.79417e-05	0.00021618	0.000140487	3123/2207/9308/1051/3133/6850/942	7
689	Mac_T	GO:0032673	regulation of interleukin-4 production	7/459	35/18870	1.79417e-05	0.00021618	0.000140487	3123/2207/9308/1051/3133/6850/942	7
690	Mac_T	GO:0006623	protein targeting to vacuole	8/459	48/18870	1.85192e-05	0.000222533	0.000144615	8878/9765/3920/7805/4074/950/7879/84572	8
691	Mac_T	GO:1990778	protein localization to cell periphery	23/459	353/18870	1.97591e-05	0.000236787	0.000153879	3958/115548/1601/8878/55022/4035/6281/8673/5872/23136/11031/537/54209/23433/975/481/8650/5962/6622/8417/55704/7879/4644	23
692	Mac_T	GO:1904035	regulation of epithelial cell apoptotic process	12/459	113/18870	1.99219e-05	0.000238094	0.000154728	6347/26471/7538/3383/4780/831/2934/677/3162/4864/8837/28984	12
693	Mac_T	GO:0046348	amino sugar catabolic process	5/459	15/18870	2.04519e-05	0.000243769	0.000158416	80896/216/55577/4245/1116	5
694	Mac_T	GO:0010543	regulation of platelet activation	8/459	49/18870	2.16669e-05	0.000257557	0.000167376	348/2207/928/5341/4067/84034/6850/7099	8
695	Mac_T	GO:0002474	antigen processing and presentation of peptide antigen via MHC class I	7/459	36/18870	2.18095e-05	0.000257865	0.000167577	10437/2207/3105/3106/3133/567/2209	7
696	Mac_T	GO:0050931	pigment cell differentiation	7/459	36/18870	2.18095e-05	0.000257865	0.000167577	967/9839/6648/83938/4286/10981/4208	7
697	Mac_T	GO:0030183	B cell differentiation	14/459	153/18870	2.29227e-05	0.000270304	0.00017566	3956/1316/6688/6850/3394/3398/5795/64332/677/4853/10673/56833/6482/1880	14
698	Mac_T	GO:0015850	organic hydroxy compound transport	21/459	308/18870	2.31942e-05	0.000272779	0.000177268	348/341/10577/4792/706/4481/302/948/1601/3988/4790/4035/5468/19/54209/6850/6622/4864/114876/55207/6696	21
699	Mac_T	GO:0032371	regulation of sterol transport	10/459	80/18870	2.3629e-05	0.000276422	0.000179636	348/341/4792/706/302/4790/4035/5468/19/54209	10
700	Mac_T	GO:0032374	regulation of cholesterol transport	10/459	80/18870	2.3629e-05	0.000276422	0.000179636	348/341/4792/706/302/4790/4035/5468/19/54209	10
701	Mac_T	GO:0002483	antigen processing and presentation of endogenous peptide antigen	6/459	25/18870	2.39645e-05	0.000278139	0.000180751	3122/3123/3105/3106/3133/567	6
702	Mac_T	GO:0043302	positive regulation of leukocyte degranulation	6/459	25/18870	2.39645e-05	0.000278139	0.000180751	3689/3916/8673/6850/9846/2268	6
703	Mac_T	GO:0046641	positive regulation of alpha-beta T cell proliferation	6/459	25/18870	2.39645e-05	0.000278139	0.000180751	3105/3133/3606/6850/975/8767	6
704	Mac_T	GO:0001914	regulation of T cell mediated cytotoxicity	8/459	50/18870	2.52513e-05	0.000291436	0.000189393	3122/3123/3105/5027/3106/3133/567/8417	8
705	Mac_T	GO:0048066	developmental pigmentation	8/459	50/18870	2.52513e-05	0.000291436	0.000189393	967/9839/6648/83938/4286/10981/4208/10159	8
706	Mac_T	GO:0046394	carboxylic acid biosynthetic process	22/459	334/18870	2.53079e-05	0.000291436	0.000189393	972/341/8942/1593/11343/3553/6507/216/8564/10993/6850/9444/29108/4048/2681/4259/4023/6916/2879/2752/114876/2171	22
707	Mac_T	GO:0010038	response to metal ion	23/459	359/18870	2.57771e-05	0.000296068	0.000192403	706/929/1536/5641/6648/2203/2353/4318/4780/3726/5027/3091/4208/5025/5176/4048/805/3162/567/6622/8826/4864/144402	23
708	Mac_T	GO:0030888	regulation of B cell proliferation	9/459	65/18870	2.63307e-05	0.000301644	0.000196026	972/7305/4067/4332/4208/975/7099/10673/1880	9
709	Mac_T	GO:0010950	positive regulation of endopeptidase activity	14/459	156/18870	2.85028e-05	0.000325684	0.000211649	1509/5641/4067/1612/5468/6850/2934/29108/6280/7805/8767/64581/6622/444	14
710	Mac_T	GO:0016053	organic acid biosynthetic process	22/459	337/18870	2.89971e-05	0.000329627	0.000214212	972/341/8942/1593/11343/3553/6507/216/8564/10993/6850/9444/29108/4048/2681/4259/4023/6916/2879/2752/114876/2171	22
711	Mac_T	GO:0062012	regulation of small molecule metabolic process	22/459	337/18870	2.89971e-05	0.000329627	0.000214212	972/348/341/5341/8870/706/26471/2203/1601/3553/5027/55022/4790/5468/54209/3091/1958/144811/6622/4199/2170/2171	22
712	Mac_T	GO:0002679	respiratory burst involved in defense response	5/459	16/18870	2.91549e-05	0.000330571	0.000214825	2896/3988/3055/54209/56833	5
713	Mac_T	GO:2001234	negative regulation of apoptotic signaling pathway	18/459	243/18870	2.9942e-05	0.000338628	0.000220061	3958/972/8870/6648/5329/4318/960/2876/3553/3383/4780/3091/8829/3162/2907/7009/4000/8837	18
714	Mac_T	GO:0051928	positive regulation of calcium ion transport	12/459	118/18870	3.08311e-05	0.000347794	0.000226018	3958/6347/6348/6351/706/5027/490/5025/481/805/1230/6622	12
715	Mac_T	GO:0002369	T cell cytokine production	7/459	38/18870	3.16166e-05	0.000353051	0.000229434	3553/3105/11006/7133/3606/975/567	7
716	Mac_T	GO:0002724	regulation of T cell cytokine production	7/459	38/18870	3.16166e-05	0.000353051	0.000229434	3553/3105/11006/7133/3606/975/567	7
717	Mac_T	GO:0032373	positive regulation of sterol transport	7/459	38/18870	3.16166e-05	0.000353051	0.000229434	348/4792/302/4035/5468/19/54209	7
718	Mac_T	GO:0032376	positive regulation of cholesterol transport	7/459	38/18870	3.16166e-05	0.000353051	0.000229434	348/4792/302/4035/5468/19/54209	7
719	Mac_T	GO:0071248	cellular response to metal ion	16/459	200/18870	3.25711e-05	0.000362795	0.000235766	706/1536/5641/2203/2353/4318/4780/3726/4208/5025/5176/3162/567/6622/8826/144402	16
720	Mac_T	GO:0050848	regulation of calcium-mediated signaling	10/459	83/18870	3.27135e-05	0.000363465	0.000236202	6348/5341/6351/54209/6850/5025/805/64581/920/51643	10
721	Mac_T	GO:0036294	cellular response to decreased oxygen levels	14/459	158/18870	3.28553e-05	0.000364126	0.000236631	1536/2353/4780/5468/54209/3091/1958/677/3162/7009/4000/8837/80315/28984	14
722	Mac_T	GO:0051051	negative regulation of transport	27/459	469/18870	3.48132e-05	0.00038486	0.000250106	3958/972/348/341/706/302/948/79772/4318/3553/6386/4043/6688/55022/4790/8673/140885/7097/7133/23191/8832/805/6622/7009/7879/124935/2171	27
723	Mac_T	GO:0032868	response to insulin	19/459	269/18870	3.49455e-05	0.000385359	0.00025043	1509/2203/4067/2353/3553/55022/5872/5468/11031/7097/23433/490/23191/5791/1958/677/1513/8837/4644	19
724	Mac_T	GO:0034101	erythrocyte homeostasis	13/459	140/18870	3.83001e-05	0.000420701	0.000273397	4067/7538/9935/6688/3091/3398/677/1777/51522/3162/567/92/8837	13
725	Mac_T	GO:0010875	positive regulation of cholesterol efflux	6/459	27/18870	3.84358e-05	0.000420701	0.000273397	348/4792/4035/5468/19/54209	6
726	Mac_T	GO:0016188	synaptic vesicle maturation	6/459	27/18870	3.84358e-05	0.000420701	0.000273397	537/9296/10159/526/9114/523	6
727	Mac_T	GO:0097193	intrinsic apoptotic signaling pathway	21/459	319/18870	3.88507e-05	0.000424192	0.000275666	972/8870/6648/26471/5329/4318/960/2876/597/1051/4780/54209/57600/7133/3091/29108/6280/2907/2272/1687/7009	21
728	Mac_T	GO:0051056	regulation of small GTPase mediated signal transduction	20/459	295/18870	3.91763e-05	0.000426694	0.000277292	348/2203/8878/93663/19/90627/11337/8829/57514/58504/4853/5962/79658/29/7204/23362/23075/121512/81704/83478	20
729	Mac_T	GO:0019377	glycolipid catabolic process	5/459	17/18870	4.04794e-05	0.000436586	0.00028372	3074/2760/2517/3073/2717	5
730	Mac_T	GO:0055119	relaxation of cardiac muscle	5/459	17/18870	4.04794e-05	0.000436586	0.00028372	5144/6546/2934/5025/481	5
731	Mac_T	GO:0097067	cellular response to thyroid hormone stimulus	5/459	17/18870	4.04794e-05	0.000436586	0.00028372	1520/1508/1512/1514/5962	5
732	Mac_T	GO:1903729	regulation of plasma membrane organization	5/459	17/18870	4.04794e-05	0.000436586	0.00028372	302/79026/6281/50807/2934	5
733	Mac_T	GO:0032677	regulation of interleukin-8 production	11/459	103/18870	4.17275e-05	0.000448951	0.000291756	972/929/3553/7097/6850/29108/7099/64581/307/965/1116	11
734	Mac_T	GO:0022408	negative regulation of cell-cell adhesion	16/459	205/18870	4.39558e-05	0.000471778	0.00030659	3958/10457/972/3123/928/1051/6688/53827/11006/8764/7805/5962/942/23075/3557/28984	16
735	Mac_T	GO:0032637	interleukin-8 production	11/459	104/18870	4.56592e-05	0.000488518	0.000317469	972/929/3553/7097/6850/29108/7099/64581/307/965/1116	11
736	Mac_T	GO:0010959	regulation of metal ion transport	24/459	398/18870	4.57365e-05	0.000488518	0.000317469	3958/6347/6348/967/6351/706/4067/5144/79026/5027/1535/53827/6546/54209/490/5025/8832/481/805/1230/920/567/6622/7009	24
737	Mac_T	GO:0051495	positive regulation of cytoskeleton organization	15/459	184/18870	4.59968e-05	0.000490115	0.000318506	5341/3055/5027/6281/342184/23191/2934/8829/29108/9659/23075/51429/55704/10602/28984	15
738	Mac_T	GO:0043281	regulation of cysteine-type endopeptidase activity involved in apoptotic process	14/459	163/18870	4.63799e-05	0.000491827	0.000319619	1509/5329/4318/960/2876/1612/5468/6850/2934/29108/6280/7805/64581/6622	14
739	Mac_T	GO:0043524	negative regulation of neuron apoptotic process	14/459	163/18870	4.63799e-05	0.000491827	0.000319619	348/6347/2896/5641/6648/1051/7832/3091/4208/8829/6622/23129/51643/80315	14
740	Mac_T	GO:0048245	eosinophil chemotaxis	6/459	28/18870	4.79201e-05	0.00050453	0.000327874	3958/6347/6348/6351/414062/6355	6
741	Mac_T	GO:0070423	nucleotide-binding oligomerization domain containing signaling pathway	6/459	28/18870	4.79201e-05	0.00050453	0.000327874	4792/55577/144811/8767/7099/51296	6
742	Mac_T	GO:0090594	inflammatory response to wounding	6/459	28/18870	4.79201e-05	0.00050453	0.000327874	2896/5468/3091/64332/7099/3162	6
743	Mac_T	GO:0071241	cellular response to inorganic substance	17/459	229/18870	4.82181e-05	0.000505262	0.00032835	706/1536/5641/2203/2353/4318/4780/3726/4208/5025/5176/3162/567/6622/8826/144402/8837	17
744	Mac_T	GO:0097191	extrinsic apoptotic signaling pathway	17/459	229/18870	4.82181e-05	0.000505262	0.00032835	3958/2876/597/3553/3383/6688/5027/1612/7133/11337/8829/64332/29108/7099/3162/4000/8837	17
745	Mac_T	GO:0018108	peptidyl-tyrosine phosphorylation	19/459	276/18870	4.9545e-05	0.000517938	0.000336588	972/948/4067/3689/960/3055/11006/8613/54209/3606/8764/6850/8829/5795/5912/8767/920/2209/2268	19
746	Mac_T	GO:0050852	T cell receptor signaling pathway	13/459	144/18870	5.14357e-05	0.000535174	0.000347788	3958/3123/3115/3119/5144/3988/3105/11006/5795/64332/975/7805/8767	13
747	Mac_T	GO:1904019	epithelial cell apoptotic process	13/459	144/18870	5.14357e-05	0.000535174	0.000347788	6347/26471/7538/3383/4780/831/2934/64332/677/3162/4864/8837/28984	13
748	Mac_T	GO:0045936	negative regulation of phosphate metabolic process	23/459	376/18870	5.27995e-05	0.000548073	0.000356171	3958/348/341/5341/706/4067/5144/3553/55022/6546/140885/11006/5468/8613/116496/5795/29108/1843/805/6622/11213/23075/8826	23
749	Mac_T	GO:0050730	regulation of peptidyl-tyrosine phosphorylation	17/459	231/18870	5.3763e-05	0.000556768	0.000361822	972/948/4067/3689/960/11006/8613/54209/3606/8764/6850/8829/5795/5912/8767/920/2209	17
750	Mac_T	GO:1903317	regulation of protein maturation	9/459	71/18870	5.39345e-05	0.000557239	0.000362128	1522/302/5329/5328/831/6281/9462/2934/6196	9
751	Mac_T	GO:0050672	negative regulation of lymphocyte proliferation	10/459	88/18870	5.44879e-05	0.000560251	0.000364085	10457/7305/3123/4067/1051/4332/11006/8764/942/7940	10
752	Mac_T	GO:0018212	peptidyl-tyrosine modification	19/459	278/18870	5.46091e-05	0.000560251	0.000364085	972/948/4067/3689/960/3055/11006/8613/54209/3606/8764/6850/8829/5795/5912/8767/920/2209/2268	19
753	Mac_T	GO:0010755	regulation of plasminogen activation	5/459	18/18870	5.49319e-05	0.000560251	0.000364085	1522/302/5329/5328/6281	5
754	Mac_T	GO:0030730	sequestering of triglyceride	5/459	18/18870	5.49319e-05	0.000560251	0.000364085	123/3553/5468/54209/4023	5
755	Mac_T	GO:0090713	immunological memory process	5/459	18/18870	5.49319e-05	0.000560251	0.000364085	3122/3123/8764/975/6482	5
756	Mac_T	GO:0010563	negative regulation of phosphorus metabolic process	23/459	377/18870	5.49862e-05	0.000560251	0.000364085	3958/348/341/5341/706/4067/5144/3553/55022/6546/140885/11006/5468/8613/116496/5795/29108/1843/805/6622/11213/23075/8826	23
757	Mac_T	GO:0043434	response to peptide hormone	25/459	430/18870	5.77305e-05	0.00058686	0.000381378	1509/1536/2203/4067/2353/3553/4780/55022/4790/5872/5468/7832/11031/7097/23433/490/9518/23191/5791/1958/677/4048/1513/8837/4644	25
758	Mac_T	GO:0045732	positive regulation of protein catabolic process	16/459	210/18870	5.87159e-05	0.000595149	0.000386764	348/8870/26471/1601/3553/4780/4035/54209/7133/10533/11337/975/5962/51429/255488/7879	16
759	Mac_T	GO:0043370	regulation of CD4-positive, alpha-beta T cell differentiation	8/459	56/18870	5.88151e-05	0.000595149	0.000386764	3122/3123/9308/3726/3606/64332/8767/942	8
760	Mac_T	GO:0035872	nucleotide-binding domain, leucine rich repeat containing receptor signaling pathway	6/459	29/18870	5.91885e-05	0.0005962	0.000387447	4792/55577/144811/8767/7099/51296	6
761	Mac_T	GO:0090025	regulation of monocyte chemotaxis	6/459	29/18870	5.91885e-05	0.0005962	0.000387447	5641/7941/4067/1843/1230/56833	6
762	Mac_T	GO:0032945	negative regulation of mononuclear cell proliferation	10/459	89/18870	6.00733e-05	0.000603737	0.000392345	10457/7305/3123/4067/1051/4332/11006/8764/942/7940	10
763	Mac_T	GO:0050850	positive regulation of calcium-mediated signaling	7/459	42/18870	6.21486e-05	0.000620364	0.00040315	6348/6351/54209/6850/5025/64581/920	7
764	Mac_T	GO:0071364	cellular response to epidermal growth factor stimulus	7/459	42/18870	6.21486e-05	0.000620364	0.00040315	2353/1601/7538/5782/677/8826/8837	7
765	Mac_T	GO:0140467	integrated stress response signaling	7/459	42/18870	6.21486e-05	0.000620364	0.00040315	2353/1051/9935/4780/3726/1052/4094	7
766	Mac_T	GO:0051090	regulation of DNA-binding transcription factor activity	24/459	406/18870	6.25312e-05	0.000622777	0.000404718	4792/6446/26471/948/3553/6688/3055/5468/8613/7097/3606/6850/3398/29108/6280/8767/7099/8553/3162/64581/11213/307/8837/28984	24
767	Mac_T	GO:0071456	cellular response to hypoxia	13/459	147/18870	6.37074e-05	0.000633065	0.000411404	1536/2353/4780/5468/54209/3091/1958/677/3162/7009/4000/8837/28984	13
768	Mac_T	GO:0050731	positive regulation of peptidyl-tyrosine phosphorylation	14/459	168/18870	6.45443e-05	0.000636113	0.000413385	972/948/4067/960/8613/54209/3606/8764/6850/8829/5795/8767/920/2209	14
769	Mac_T	GO:0002291	T cell activation via T cell receptor contact with antigen bound to MHC molecule on antigen presenting cell	4/459	10/18870	6.45895e-05	0.000636113	0.000413385	3958/3109/3383/975	4
770	Mac_T	GO:0031666	positive regulation of lipopolysaccharide-mediated signaling pathway	4/459	10/18870	6.45895e-05	0.000636113	0.000413385	929/23643/9450/23328	4
771	Mac_T	GO:0045657	positive regulation of monocyte differentiation	4/459	10/18870	6.45895e-05	0.000636113	0.000413385	972/3123/677/920	4
772	Mac_T	GO:0050678	regulation of epithelial cell proliferation	24/459	407/18870	6.49789e-05	0.000638526	0.000414953	348/6347/2896/26471/728/1601/2876/7538/8828/283131/5468/3091/4208/6678/8829/677/5176/7423/4853/3162/567/2683/8837/28984	24
773	Mac_T	GO:0045619	regulation of lymphocyte differentiation	16/459	212/18870	6.57441e-05	0.000644613	0.000418909	972/3122/3123/9308/6688/3726/11006/3606/6850/3398/64332/677/8767/942/56833/639	16
774	Mac_T	GO:0017157	regulation of exocytosis	15/459	190/18870	6.64474e-05	0.000648376	0.000421354	302/4067/3689/6386/6688/6281/3916/8673/5872/6850/8832/6622/9846/2268/7879	15
775	Mac_T	GO:2001242	regulation of intrinsic apoptotic signaling pathway	15/459	190/18870	6.64474e-05	0.000648376	0.000421354	972/6648/26471/5329/4318/960/2876/4780/54209/3091/29108/6280/2907/1687/7009	15
776	Mac_T	GO:0045861	negative regulation of proteolysis	17/459	235/18870	6.65678e-05	0.000648376	0.000421354	1471/1522/1476/5329/4318/5328/960/2876/7077/831/4035/1475/1992/5176/6622/2272/5269	17
777	Mac_T	GO:0006879	intracellular iron ion homeostasis	9/459	73/18870	6.73573e-05	0.000653188	0.000424481	2512/2495/537/3091/220002/3162/567/9114/523	9
778	Mac_T	GO:0050818	regulation of coagulation	9/459	73/18870	6.73573e-05	0.000653188	0.000424481	348/928/302/948/308/5329/5328/4780/84034	9
779	Mac_T	GO:0043304	regulation of mast cell degranulation	6/459	30/18870	7.24772e-05	0.000700864	0.000455464	4067/8673/6850/8832/9846/2268	6
780	Mac_T	GO:0045622	regulation of T-helper cell differentiation	7/459	43/18870	7.26938e-05	0.000700864	0.000455464	3122/3123/3726/3606/64332/8767/942	7
781	Mac_T	GO:0002283	neutrophil activation involved in immune response	5/459	19/18870	7.30661e-05	0.000700864	0.000455464	7305/2207/3689/6688/6850	5
782	Mac_T	GO:0010744	positive regulation of macrophage derived foam cell differentiation	5/459	19/18870	7.30661e-05	0.000700864	0.000455464	4481/948/4790/3606/4023	5
783	Mac_T	GO:0032928	regulation of superoxide anion generation	5/459	19/18870	7.30661e-05	0.000700864	0.000455464	7305/54/3689/6850/64581	5
784	Mac_T	GO:1903409	reactive oxygen species biosynthetic process	8/459	58/18870	7.60665e-05	0.000728065	0.000473141	1536/6648/948/3988/1535/7099/6622/8837	8
785	Mac_T	GO:0019932	second-messenger-mediated signaling	20/459	310/18870	7.81128e-05	0.000746036	0.000484819	348/6348/3576/5341/6351/948/5144/79772/5027/6546/54209/6850/5025/5795/481/805/64581/1230/920/51643	20
786	Mac_T	GO:0010595	positive regulation of endothelial cell migration	12/459	130/18870	8.01245e-05	0.0007636	0.000496234	2896/5641/4780/8828/8613/3091/6678/8829/5025/23328/3162/54453	12
787	Mac_T	GO:0007229	integrin-mediated signaling pathway	11/459	111/18870	8.32051e-05	0.000791254	0.000514205	967/5341/3687/3689/3055/8613/6850/8829/7791/2268/3987	11
788	Mac_T	GO:0046640	regulation of alpha-beta T cell proliferation	7/459	44/18870	8.46549e-05	0.000803313	0.000522042	3105/3133/3606/8764/6850/975/8767	7
789	Mac_T	GO:0007162	negative regulation of cell adhesion	20/459	312/18870	8.53107e-05	0.000807803	0.000524959	3958/10457/972/3123/928/1051/6688/53827/11006/7045/8764/7805/1843/5962/942/23075/23129/10154/3557/28984	20
790	Mac_T	GO:0033619	membrane protein proteolysis	8/459	59/18870	8.61516e-05	0.000813682	0.00052878	348/1512/3553/7077/5027/7133/81502/51429	8
791	Mac_T	GO:0030218	erythrocyte differentiation	12/459	131/18870	8.62996e-05	0.000813682	0.00052878	4067/7538/9935/6688/3091/3398/677/1777/51522/567/92/8837	12
792	Mac_T	GO:0043367	CD4-positive, alpha-beta T cell differentiation	10/459	93/18870	8.75512e-05	0.000823727	0.000535308	3122/3123/9308/1514/3726/3606/64332/8767/942/1880	10
793	Mac_T	GO:2000191	regulation of fatty acid transport	6/459	31/18870	8.80402e-05	0.000826568	0.000537154	3553/2180/5027/6850/5025/2170	6
794	Mac_T	GO:0002262	myeloid cell homeostasis	14/459	173/18870	8.86278e-05	0.000830322	0.000539594	4067/3988/7538/9935/6688/3091/3398/677/1777/51522/3162/567/92/8837	14
795	Mac_T	GO:0030203	glycosaminoglycan metabolic process	11/459	112/18870	9.02848e-05	0.000844058	0.00054852	9956/960/3553/4790/3074/2517/2799/3073/10678/6482/10402	11
796	Mac_T	GO:0043122	regulation of canonical NF-kappaB signal transduction	18/459	265/18870	9.23012e-05	0.000861088	0.000559587	972/3123/3956/9516/948/3553/8878/6275/11006/54209/10010/29108/8767/7099/3162/64581/920/8837	18
797	Mac_T	GO:0001667	ameboidal-type cell migration	27/459	497/18870	9.29036e-05	0.000864883	0.000562054	348/2896/9839/1512/5641/4318/2876/4780/8828/5872/5468/8613/90627/3091/4208/6678/8829/5025/6280/5176/23328/3162/54453/8826/23129/2752/28984	27
798	Mac_T	GO:1900221	regulation of amyloid-beta clearance	5/459	20/18870	9.54829e-05	0.000887028	0.000576445	348/4043/4035/54209/3459	5
799	Mac_T	GO:0008347	glial cell migration	8/459	60/18870	9.73199e-05	0.000902199	0.000586304	6347/6348/928/706/3074/54209/5025/1880	8
800	Mac_T	GO:0002347	response to tumor cell	7/459	45/18870	9.8172e-05	0.000908194	0.0005902	3123/6688/3105/1612/7805/4853/1687	7
801	Mac_T	GO:0048872	homeostasis of number of cells	20/459	316/18870	0.000101493	0.000936959	0.000608893	972/4067/3988/7538/9935/6688/5027/3091/4208/3398/64332/677/1777/51522/3162/567/92/10673/1880/8837	20
802	Mac_T	GO:0032890	regulation of organic acid transport	9/459	77/18870	0.000102739	0.000946479	0.000615079	3553/2180/5027/8564/6850/5025/6622/2170/124935	9
803	Mac_T	GO:0031334	positive regulation of protein-containing complex assembly	15/459	198/18870	0.00010585	0.000969468	0.000630019	3958/5341/948/3055/19/57600/342184/6850/29108/7099/64581/6622/9659/51429/10602	15
804	Mac_T	GO:0002431	Fc receptor mediated stimulatory signaling pathway	6/459	32/18870	0.00010615	0.000969468	0.000630019	2207/4067/3055/6850/5795/2268	6
805	Mac_T	GO:0033006	regulation of mast cell activation involved in immune response	6/459	32/18870	0.00010615	0.000969468	0.000630019	4067/8673/6850/8832/9846/2268	6
806	Mac_T	GO:0072677	eosinophil migration	6/459	32/18870	0.00010615	0.000969468	0.000630019	3958/6347/6348/6351/414062/6355	6
807	Mac_T	GO:0010634	positive regulation of epithelial cell migration	14/459	176/18870	0.000106549	0.000969468	0.000630019	2896/1512/5641/4318/4780/8828/8613/3091/6678/8829/5025/23328/3162/54453	14
808	Mac_T	GO:0043409	negative regulation of MAPK cascade	14/459	176/18870	0.000106549	0.000969468	0.000630019	348/4067/1601/3553/5027/140885/11006/5468/54209/5795/1844/1843/7099/11213	14
809	Mac_T	GO:0034113	heterotypic cell-cell adhesion	8/459	61/18870	0.00010966	0.000995724	0.000647082	3687/3689/960/3553/4814/140885/965/3557	8
810	Mac_T	GO:0070849	response to epidermal growth factor	7/459	46/18870	0.000113394	0.00102542	0.000666379	2353/1601/7538/5782/677/8826/8837	7
811	Mac_T	GO:0097028	dendritic cell differentiation	7/459	46/18870	0.000113394	0.00102542	0.000666379	4067/1051/6688/3106/54209/3394/4853	7
812	Mac_T	GO:2000514	regulation of CD4-positive, alpha-beta T cell activation	9/459	78/18870	0.00011368	0.0010259	0.000666693	3122/3123/9308/3726/3606/64332/975/8767/942	9
813	Mac_T	GO:0007032	endosome organization	10/459	96/18870	0.000114572	0.00102875	0.000668546	8878/527/440400/537/533/9296/10159/950/523/7879	10
814	Mac_T	GO:0070664	negative regulation of leukocyte proliferation	10/459	96/18870	0.000114572	0.00102875	0.000668546	10457/7305/3123/4067/1051/4332/11006/8764/942/7940	10
815	Mac_T	GO:0043473	pigmentation	11/459	115/18870	0.000114694	0.00102875	0.000668546	348/967/9839/6648/83938/4286/10981/8905/4208/10159/4644	11
816	Mac_T	GO:0002888	positive regulation of myeloid leukocyte mediated immunity	5/459	21/18870	0.000122829	0.00109727	0.000713075	7305/3689/6688/3133/2209	5
817	Mac_T	GO:0046514	ceramide catabolic process	5/459	21/18870	0.000122829	0.00109727	0.000713075	427/3074/2760/3073/2717	5
818	Mac_T	GO:0043030	regulation of macrophage activation	8/459	62/18870	0.000123266	0.00109896	0.000714168	972/6348/2896/1075/54209/8832/7099/6622	8
819	Mac_T	GO:0015908	fatty acid transport	11/459	116/18870	0.000123989	0.00110318	0.000716911	348/123/948/3553/2180/5027/5468/6850/5025/2170/2171	11
820	Mac_T	GO:0007596	blood coagulation	16/459	224/18870	0.0001256	0.00111527	0.000724771	348/2207/928/5341/302/948/4067/308/5329/5328/4780/84034/966/6850/5912/7099	16
821	Mac_T	GO:0043618	regulation of transcription from RNA polymerase II promoter in response to stress	6/459	33/18870	0.000127097	0.0011263	0.000731938	1051/4780/3091/1958/3162/7009	6
822	Mac_T	GO:0046633	alpha-beta T cell proliferation	7/459	47/18870	0.000130479	0.00115396	0.000749913	3105/3133/3606/8764/6850/975/8767	7
823	Mac_T	GO:0002931	response to ischemia	8/459	63/18870	0.000138235	0.00122011	0.000792904	8878/4780/5027/54209/4208/1958/5025/80315	8
824	Mac_T	GO:0036295	cellular response to increased oxygen levels	4/459	12/18870	0.000146458	0.00128797	0.000837003	537/10533/9114/523	4
825	Mac_T	GO:0045055	regulated exocytosis	16/459	227/18870	0.000146506	0.00128797	0.000837003	6348/5341/4067/3689/6688/3055/5027/3916/8673/11031/6850/8832/6622/9846/2268/55207	16
826	Mac_T	GO:0031295	T cell costimulation	7/459	48/18870	0.000149595	0.00131251	0.000852952	3956/4067/11006/8764/975/942/10673	7
827	Mac_T	GO:1902600	proton transmembrane transport	13/459	160/18870	0.000150903	0.00131867	0.000856954	527/440400/537/533/9296/10159/481/526/51296/285195/8992/9114/523	13
828	Mac_T	GO:0006026	aminoglycan catabolic process	6/459	34/18870	0.000151191	0.00131867	0.000856954	960/3074/2517/2799/3073/1116	6
829	Mac_T	GO:0034110	regulation of homotypic cell-cell adhesion	6/459	34/18870	0.000151191	0.00131867	0.000856954	928/4067/5329/84034/6850/5962	6
830	Mac_T	GO:0030500	regulation of bone mineralization	9/459	81/18870	0.000152518	0.00132762	0.000862771	6348/5027/6546/5552/3091/4208/490/1230/92	9
831	Mac_T	GO:0035710	CD4-positive, alpha-beta T cell activation	11/459	119/18870	0.000155818	0.00135229	0.0008788	3122/3123/9308/1514/3726/3606/64332/975/8767/942/1880	11
832	Mac_T	GO:0010001	glial cell differentiation	17/459	252/18870	0.000155963	0.00135229	0.0008788	2896/9839/7431/4067/728/3553/4035/712/8613/7097/54209/7133/3398/6280/9334/7099/3459	17
833	Mac_T	GO:0060759	regulation of response to cytokine stimulus	14/459	183/18870	0.000161029	0.00139348	0.000905571	972/54502/25939/5468/7097/54209/3091/6850/29108/7805/8767/7099/11213/3557	14
834	Mac_T	GO:0050817	coagulation	16/459	229/18870	0.000162074	0.00139979	0.000909665	348/2207/928/5341/302/948/4067/308/5329/5328/4780/84034/966/6850/5912/7099	16
835	Mac_T	GO:0070227	lymphocyte apoptotic process	9/459	82/18870	0.000167696	0.00144552	0.000939389	3958/972/4067/3988/5027/3091/64332/81704/6482	9
836	Mac_T	GO:0072666	establishment of protein localization to vacuole	8/459	65/18870	0.000172685	0.00148563	0.000965453	8878/9765/3920/7805/4074/950/7879/84572	8
837	Mac_T	GO:0007599	hemostasis	16/459	231/18870	0.000179063	0.00153751	0.000999165	348/2207/928/5341/302/948/4067/308/5329/5328/4780/84034/966/6850/5912/7099	16
838	Mac_T	GO:0071887	leukocyte apoptotic process	11/459	121/18870	0.000180688	0.00154845	0.00100628	3958/972/4067/1514/3988/5027/3091/4208/64332/81704/6482	11
839	Mac_T	GO:0070167	regulation of biomineral tissue development	10/459	102/18870	0.000190107	0.00162602	0.00105669	6348/1051/5027/6546/5552/3091/4208/490/1230/92	10
840	Mac_T	GO:0031294	lymphocyte costimulation	7/459	50/18870	0.000194629	0.00166148	0.00107973	3956/4067/11006/8764/975/942/10673	7
841	Mac_T	GO:2000193	positive regulation of fatty acid transport	5/459	23/18870	0.000195118	0.00166245	0.00108036	3553/2180/5027/5025/2170	5
842	Mac_T	GO:0002292	T cell differentiation involved in immune response	9/459	84/18870	0.000201846	0.00171647	0.00111547	3122/3123/2207/3726/3606/64332/8767/942/1880	9
843	Mac_T	GO:0051960	regulation of nervous system development	25/459	466/18870	0.000203518	0.00172736	0.00112255	706/302/3687/4067/3553/1890/6281/7832/1075/7097/54209/7133/3091/23191/8829/3398/57698/5176/8650/8553/567/23129/79365/10154/6696	25
844	Mac_T	GO:0061572	actin filament bundle organization	13/459	165/18870	0.000204956	0.00173623	0.00112831	4082/9839/5341/6281/56907/8829/221692/57698/5962/23075/7791/55704/28984	13
845	Mac_T	GO:0010642	negative regulation of platelet-derived growth factor receptor signaling pathway	4/459	13/18870	0.000207494	0.0017477	0.00113576	4035/5782/5795/6622	4
846	Mac_T	GO:0032490	detection of molecule of bacterial origin	4/459	13/18870	0.000207494	0.0017477	0.00113576	23643/7097/54209/7099	4
847	Mac_T	GO:0032494	response to peptidoglycan	4/459	13/18870	0.000207494	0.0017477	0.00113576	728/54209/8767/11213	4
848	Mac_T	GO:0015909	long-chain fatty acid transport	8/459	67/18870	0.0002139	0.00179141	0.00116417	348/123/948/2180/5468/6850/2170/2171	8
849	Mac_T	GO:0060760	positive regulation of response to cytokine stimulus	8/459	67/18870	0.0002139	0.00179141	0.00116417	972/54502/7097/54209/3091/7805/8767/7099	8
850	Mac_T	GO:0070613	regulation of protein processing	8/459	67/18870	0.0002139	0.00179141	0.00116417	1522/302/5329/5328/831/6281/2934/6196	8
851	Mac_T	GO:0032365	intracellular lipid transport	7/459	51/18870	0.000220928	0.00184329	0.00119788	10577/302/19/10087/4864/2170/55207	7
852	Mac_T	GO:0043407	negative regulation of MAP kinase activity	7/459	51/18870	0.000220928	0.00184329	0.00119788	348/4067/3553/5468/5795/1843/11213	7
853	Mac_T	GO:0042100	B cell proliferation	10/459	104/18870	0.000223126	0.00185812	0.00120752	972/7305/4067/4332/4208/64332/975/7099/10673/1880	10
854	Mac_T	GO:0072676	lymphocyte migration	11/459	124/18870	0.000224262	0.00186407	0.00121139	6347/6348/6351/414062/3383/8764/29108/6355/58191/81704/1880	11
855	Mac_T	GO:0042552	myelination	12/459	145/18870	0.000226446	0.0018787	0.00122089	928/3687/1890/3074/23136/1075/7097/7133/23191/9444/9334/3073	12
856	Mac_T	GO:0071375	cellular response to peptide hormone stimulus	19/459	310/18870	0.000226957	0.00187941	0.00122135	1509/2203/4067/2353/3553/4780/55022/4790/5872/5468/11031/23433/490/9518/23191/5791/677/8837/4644	19
857	Mac_T	GO:1902903	regulation of supramolecular fiber organization	22/459	389/18870	0.000234645	0.00193944	0.00126036	348/5341/822/2876/3055/93663/6281/6050/54209/342184/23191/2934/8829/29108/5962/6622/9659/23075/51429/55704/10602/28984	22
858	Mac_T	GO:0030193	regulation of blood coagulation	8/459	68/18870	0.000237345	0.00195809	0.00127249	348/928/302/948/5329/5328/4780/84034	8
859	Mac_T	GO:0033674	positive regulation of kinase activity	20/459	337/18870	0.000239419	0.00197153	0.00128122	972/3123/3553/23533/54209/3606/1958/23328/7099/805/920/942/6622/8826/51429/55704/2209/2268/1116/28984	20
860	Mac_T	GO:0007039	protein catabolic process in the vacuole	5/459	24/18870	0.000241572	0.00198188	0.00128795	4035/3920/975/29952/1200	5
861	Mac_T	GO:0051043	regulation of membrane protein ectodomain proteolysis	5/459	24/18870	0.000241572	0.00198188	0.00128795	348/3553/7077/7133/51429	5
862	Mac_T	GO:0050767	regulation of neurogenesis	22/459	390/18870	0.000243185	0.00199142	0.00129414	706/302/4067/3553/6281/7832/7097/54209/7133/3091/23191/8829/3398/57698/5176/8650/8553/567/23129/79365/10154/6696	22
863	Mac_T	GO:0007272	ensheathment of neurons	12/459	147/18870	0.000257205	0.00209845	0.0013637	928/3687/1890/3074/23136/1075/7097/7133/23191/9444/9334/3073	12
864	Mac_T	GO:0008366	axon ensheathment	12/459	147/18870	0.000257205	0.00209845	0.0013637	928/3687/1890/3074/23136/1075/7097/7133/23191/9444/9334/3073	12
865	Mac_T	GO:0032963	collagen metabolic process	10/459	106/18870	0.000260826	0.00212408	0.00138035	1520/1471/1508/7431/1514/4318/5027/3091/1513/28984	10
866	Mac_T	GO:0050918	positive chemotaxis	8/459	69/18870	0.000262853	0.00213665	0.00138853	3958/10457/6348/3576/6275/8829/5795/7423	8
867	Mac_T	GO:0043547	positive regulation of GTPase activity	16/459	239/18870	0.000263473	0.00213776	0.00138925	6347/6348/6351/414062/153020/6281/23179/58504/6355/29/55357/81704/51429/25780/83478/3987	16
868	Mac_T	GO:0007009	plasma membrane organization	13/459	170/18870	0.000274826	0.00222579	0.00144645	928/302/9935/79026/5027/6281/23136/50807/2934/6280/51429/2350/55207	13
869	Mac_T	GO:0036293	response to decreased oxygen levels	19/459	315/18870	0.000277769	0.00224551	0.00145927	9839/1536/6648/2353/5328/4780/5468/7097/54209/3091/1958/677/7423/3162/7009/4000/8837/80315/28984	19
870	Mac_T	GO:0007265	Ras protein signal transduction	20/459	341/18870	0.000279241	0.00225329	0.00146432	348/2203/6386/8878/153020/19/23179/90627/23191/11337/8829/5912/57698/4853/5962/23362/5337/25780/83478/10602	20
871	Mac_T	GO:0006672	ceramide metabolic process	10/459	107/18870	0.000281589	0.0022681	0.00147395	427/5027/3074/8613/2760/9334/3073/10087/6482/2717	10
872	Mac_T	GO:1904645	response to amyloid-beta	7/459	53/18870	0.000282112	0.00226818	0.001474	5641/948/4318/3383/4035/54209/7099	7
873	Mac_T	GO:0046479	glycosphingolipid catabolic process	4/459	14/18870	0.000284927	0.00226953	0.00147488	3074/2760/3073/2717	4
874	Mac_T	GO:0046598	positive regulation of viral entry into host cell	4/459	14/18870	0.000284927	0.00226953	0.00147488	972/3123/3956/920	4
875	Mac_T	GO:0070341	fat cell proliferation	4/459	14/18870	0.000284927	0.00226953	0.00147488	3988/8878/55022/54209	4
876	Mac_T	GO:0075294	positive regulation by symbiont of entry into host	4/459	14/18870	0.000284927	0.00226953	0.00147488	972/3123/3956/920	4
877	Mac_T	GO:0140052	cellular response to oxidised low-density lipoprotein particle stimulus	4/459	14/18870	0.000284927	0.00226953	0.00147488	968/948/54209/7099	4
878	Mac_T	GO:0045429	positive regulation of nitric oxide biosynthetic process	6/459	38/18870	0.000285872	0.00226953	0.00147488	6648/948/3553/5025/7099/64581	6
879	Mac_T	GO:0046466	membrane lipid catabolic process	6/459	38/18870	0.000285872	0.00226953	0.00147488	427/3074/2760/2517/3073/2717	6
880	Mac_T	GO:0033627	cell adhesion mediated by integrin	9/459	88/18870	0.000287611	0.00227924	0.00148119	3687/4067/3689/5328/3383/84034/8613/6850/23075	9
881	Mac_T	GO:0042445	hormone metabolic process	16/459	241/18870	0.000289306	0.00228857	0.00148725	1522/1508/706/7941/1514/1601/4790/216/3091/1958/10159/59342/2230/1513/10404/6696	16
882	Mac_T	GO:0009311	oligosaccharide metabolic process	8/459	70/18870	0.000290561	0.00229031	0.00148838	2203/3074/2760/4125/2683/4864/10402/2717	8
883	Mac_T	GO:1900046	regulation of hemostasis	8/459	70/18870	0.000290561	0.00229031	0.00148838	348/928/302/948/5329/5328/4780/84034	8
884	Mac_T	GO:0010951	negative regulation of endopeptidase activity	11/459	128/18870	0.000295918	0.00232469	0.00151072	1471/5329/4318/960/2876/7077/831/1992/5176/6622/5269	11
885	Mac_T	GO:0035994	response to muscle stretch	5/459	25/18870	0.000295974	0.00232469	0.00151072	4792/2353/4790/6546/2934	5
886	Mac_T	GO:0062197	cellular response to chemical stress	19/459	317/18870	0.00030072	0.00235778	0.00153223	706/6648/948/2203/2353/4318/2876/8878/4780/1612/140885/3091/10533/677/29108/3162/6622/81502/5269	19
887	Mac_T	GO:1903076	regulation of protein localization to plasma membrane	10/459	108/18870	0.000303717	0.00237705	0.00154475	3958/1601/8878/55022/4035/8673/54209/23433/8650/8417	10
888	Mac_T	GO:0046849	bone remodeling	9/459	89/18870	0.000313209	0.0024427	0.00158741	54/4286/5027/6850/1200/4853/1513/7879/6696	9
889	Mac_T	GO:0050829	defense response to Gram-negative bacterium	9/459	89/18870	0.000313209	0.0024427	0.00158741	4069/6039/54209/8764/64332/29108/7099/920/219972	9
890	Mac_T	GO:0043620	regulation of DNA-templated transcription in response to stress	6/459	39/18870	0.000330988	0.00257228	0.00167163	1051/4780/3091/1958/3162/7009	6
891	Mac_T	GO:1904407	positive regulation of nitric oxide metabolic process	6/459	39/18870	0.000330988	0.00257228	0.00167163	6648/948/3553/5025/7099/64581	6
892	Mac_T	GO:0045621	positive regulation of lymphocyte differentiation	11/459	130/18870	0.000338431	0.00262551	0.00170622	972/3122/3123/9308/6688/11006/3606/6850/64332/8767/942	11
893	Mac_T	GO:0002312	B cell activation involved in immune response	9/459	90/18870	0.000340661	0.00263819	0.00171445	3956/6688/3394/64332/7099/4853/23075/6482/1880	9
894	Mac_T	GO:0002433	immune response-regulating cell surface receptor signaling pathway involved in phagocytosis	5/459	26/18870	0.000359178	0.00275744	0.00179195	4067/3055/6850/5795/2268	5
895	Mac_T	GO:0002726	positive regulation of T cell cytokine production	5/459	26/18870	0.000359178	0.00275744	0.00179195	3553/3105/3606/975/567	5
896	Mac_T	GO:0038096	Fc-gamma receptor signaling pathway involved in phagocytosis	5/459	26/18870	0.000359178	0.00275744	0.00179195	4067/3055/6850/5795/2268	5
897	Mac_T	GO:0051894	positive regulation of focal adhesion assembly	5/459	26/18870	0.000359178	0.00275744	0.00179195	6281/342184/8829/5795/3987	5
898	Mac_T	GO:1905523	positive regulation of macrophage migration	5/459	26/18870	0.000359178	0.00275744	0.00179195	6348/728/54209/5025/719	5
899	Mac_T	GO:0055088	lipid homeostasis	13/459	175/18870	0.000364108	0.00279045	0.0018134	348/10577/706/3988/5468/19/54209/3606/4023/10087/4864/2170/7392	13
900	Mac_T	GO:0045824	negative regulation of innate immune response	9/459	91/18870	0.00037007	0.00283123	0.0018399	2896/3105/3106/25939/5468/3133/2/11213/56833	9
901	Mac_T	GO:0043280	positive regulation of cysteine-type endopeptidase activity involved in apoptotic process	10/459	111/18870	0.000378993	0.00288073	0.00187207	1509/1612/5468/6850/2934/29108/6280/7805/64581/6622	10
902	Mac_T	GO:0002468	dendritic cell antigen processing and presentation	4/459	15/18870	0.0003811	0.00288073	0.00187207	972/3122/3123/968	4
903	Mac_T	GO:0010889	regulation of sequestering of triglyceride	4/459	15/18870	0.0003811	0.00288073	0.00187207	123/5468/54209/4023	4
904	Mac_T	GO:0033008	positive regulation of mast cell activation involved in immune response	4/459	15/18870	0.0003811	0.00288073	0.00187207	8673/6850/9846/2268	4
905	Mac_T	GO:0043306	positive regulation of mast cell degranulation	4/459	15/18870	0.0003811	0.00288073	0.00187207	8673/6850/9846/2268	4
906	Mac_T	GO:0071639	positive regulation of monocyte chemotactic protein-1 production	4/459	15/18870	0.0003811	0.00288073	0.00187207	3553/6850/8832/64581	4
907	Mac_T	GO:1902563	regulation of neutrophil activation	4/459	15/18870	0.0003811	0.00288073	0.00187207	2896/3689/6688/6850	4
908	Mac_T	GO:0042093	T-helper cell differentiation	8/459	73/18870	0.000388317	0.00292528	0.00190102	3122/3123/3726/3606/64332/8767/942/1880	8
909	Mac_T	GO:0072678	T cell migration	8/459	73/18870	0.000388317	0.00292528	0.00190102	6347/6348/3383/8764/29108/58191/81704/1880	8
910	Mac_T	GO:0008037	cell recognition	12/459	154/18870	0.000394364	0.00296074	0.00192407	3958/928/948/54209/8829/975/64581/2683/23129/81704/2209/2350	12
911	Mac_T	GO:0008064	regulation of actin polymerization or depolymerization	12/459	154/18870	0.000394364	0.00296074	0.00192407	5341/822/3055/93663/342184/23191/2934/29108/5962/23075/51429/10602	12
912	Mac_T	GO:0001836	release of cytochrome c from mitochondria	7/459	56/18870	0.000398703	0.00297007	0.00193013	6648/5329/4318/2876/597/29108/4000	7
913	Mac_T	GO:0001954	positive regulation of cell-matrix adhesion	7/459	56/18870	0.000398703	0.00297007	0.00193013	948/6281/342184/8829/5795/54453/3987	7
914	Mac_T	GO:0038093	Fc receptor signaling pathway	7/459	56/18870	0.000398703	0.00297007	0.00193013	2207/4067/3055/6850/5795/2209/2268	7
915	Mac_T	GO:0052372	modulation by symbiont of entry into host	7/459	56/18870	0.000398703	0.00297007	0.00193013	972/3123/3956/3576/2934/10410/920	7
916	Mac_T	GO:0110053	regulation of actin filament organization	17/459	273/18870	0.000398964	0.00297007	0.00193013	5341/822/3055/93663/6281/6050/342184/23191/2934/8829/29108/5962/23075/51429/55704/10602/28984	17
917	Mac_T	GO:1903510	mucopolysaccharide metabolic process	9/459	92/18870	0.00040154	0.00298422	0.00193933	960/3553/4790/3074/2799/3073/10678/6482/10402	9
918	Mac_T	GO:0031647	regulation of protein stability	19/459	325/18870	0.000409889	0.00304116	0.00197633	10437/7305/2896/1512/3916/5476/64747/8613/3920/2934/975/29108/481/9334/6622/444/10491/4000/112770	19
919	Mac_T	GO:0007626	locomotory behavior	14/459	201/18870	0.000422701	0.00313096	0.00203469	348/6414/6648/1476/3074/1958/3398/6622/3073/26090/123803/4864/463/51643	14
920	Mac_T	GO:0032970	regulation of actin filament-based process	21/459	379/18870	0.000423905	0.00313463	0.00203707	9839/5341/822/5144/3055/93663/4035/6281/6050/23433/342184/23191/2934/8829/29108/5962/23075/51429/55704/10602/28984	21
921	Mac_T	GO:0002224	toll-like receptor signaling pathway	8/459	74/18870	0.000426288	0.00314174	0.0020417	1520/948/23643/7097/64332/7099/11213/81622	8
922	Mac_T	GO:0006023	aminoglycan biosynthetic process	8/459	74/18870	0.000426288	0.00314174	0.0020417	9956/3553/4790/9334/3073/10678/6482/10402	8
923	Mac_T	GO:0010884	positive regulation of lipid storage	5/459	27/18870	0.000432074	0.00315807	0.00205231	123/4481/948/4790/4023	5
924	Mac_T	GO:0031639	plasminogen activation	5/459	27/18870	0.000432074	0.00315807	0.00205231	1522/302/5329/5328/6281	5
925	Mac_T	GO:0032753	positive regulation of interleukin-4 production	5/459	27/18870	0.000432074	0.00315807	0.00205231	2207/1051/3133/6850/942	5
926	Mac_T	GO:0036296	response to increased oxygen levels	5/459	27/18870	0.000432074	0.00315807	0.00205231	6648/537/10533/9114/523	5
927	Mac_T	GO:0045672	positive regulation of osteoclast differentiation	5/459	27/18870	0.000432074	0.00315807	0.00205231	7305/2353/54209/4853/1230	5
928	Mac_T	GO:0048246	macrophage chemotaxis	6/459	41/18870	0.000437827	0.00319484	0.0020762	3958/6347/6348/728/719/56833	6
929	Mac_T	GO:0038066	p38MAPK cascade	7/459	57/18870	0.000445145	0.00324288	0.00210742	3553/7538/6688/54209/677/1843/23328	7
930	Mac_T	GO:0001818	negative regulation of cytokine production	21/459	381/18870	0.000454194	0.00330336	0.00214673	10457/7305/3123/54/706/9308/7538/4790/5552/140885/11006/54209/490/8832/1992/29108/7805/7099/11213/307/28984	21
931	Mac_T	GO:0002294	CD4-positive, alpha-beta T cell differentiation involved in immune response	8/459	75/18870	0.00046722	0.00338631	0.00220063	3122/3123/3726/3606/64332/8767/942/1880	8
932	Mac_T	GO:0045806	negative regulation of endocytosis	8/459	75/18870	0.00046722	0.00338631	0.00220063	3958/341/302/79772/6386/4043/140885/7097	8
933	Mac_T	GO:0010506	regulation of autophagy	20/459	355/18870	0.000467896	0.00338631	0.00220063	5660/706/26471/8878/527/55332/5476/1612/54209/3091/533/29108/8767/526/3162/6622/8992/9114/4864/523	20
934	Mac_T	GO:2001243	negative regulation of intrinsic apoptotic signaling pathway	10/459	114/18870	0.000469198	0.00338853	0.00220207	972/6648/5329/4318/960/2876/4780/3091/2907/7009	10
935	Mac_T	GO:0030832	regulation of actin filament length	12/459	157/18870	0.000469735	0.00338853	0.00220207	5341/822/3055/93663/342184/23191/2934/29108/5962/23075/51429/10602	12
936	Mac_T	GO:0031400	negative regulation of protein modification process	23/459	437/18870	0.000472982	0.00340639	0.00221368	3958/348/706/4067/5144/3553/8878/55022/6546/1622/140885/11006/5468/8613/116496/5795/29108/1843/805/6622/11213/23075/10491	23
937	Mac_T	GO:0048008	platelet-derived growth factor receptor signaling pathway	7/459	58/18870	0.000495802	0.00354071	0.00230097	4035/4643/5782/8829/5795/6622/8826	7
938	Mac_T	GO:0016045	detection of bacterium	4/459	16/18870	0.000498415	0.00354071	0.00230097	3123/3105/3106/7097	4
939	Mac_T	GO:0032930	positive regulation of superoxide anion generation	4/459	16/18870	0.000498415	0.00354071	0.00230097	7305/3689/6850/64581	4
940	Mac_T	GO:0045019	negative regulation of nitric oxide biosynthetic process	4/459	16/18870	0.000498415	0.00354071	0.00230097	54/706/140885/2717	4
941	Mac_T	GO:0051044	positive regulation of membrane protein ectodomain proteolysis	4/459	16/18870	0.000498415	0.00354071	0.00230097	348/3553/7133/51429	4
942	Mac_T	GO:0051770	positive regulation of nitric-oxide synthase biosynthetic process	4/459	16/18870	0.000498415	0.00354071	0.00230097	6347/10135/7097/7099	4
943	Mac_T	GO:1902285	semaphorin-plexin signaling pathway involved in neuron projection guidance	4/459	16/18870	0.000498415	0.00354071	0.00230097	8828/8829/23129/10154	4
944	Mac_T	GO:1904406	negative regulation of nitric oxide metabolic process	4/459	16/18870	0.000498415	0.00354071	0.00230097	54/706/140885/2717	4
945	Mac_T	GO:0006040	amino sugar metabolic process	6/459	42/18870	0.00050044	0.00354071	0.00230097	80896/216/55577/4245/6482/1116	6
946	Mac_T	GO:0030866	cortical actin cytoskeleton organization	6/459	42/18870	0.00050044	0.00354071	0.00230097	5341/114793/5872/23136/23433/8826	6
947	Mac_T	GO:1990000	amyloid fibril formation	6/459	42/18870	0.00050044	0.00354071	0.00230097	348/948/54209/2934/567/6622	6
948	Mac_T	GO:1905475	regulation of protein localization to membrane	13/459	181/18870	0.000502772	0.00355153	0.002308	3958/3689/1601/8878/55022/4035/8673/54209/23433/2934/975/8650/8417	13
949	Mac_T	GO:0002287	alpha-beta T cell activation involved in immune response	8/459	76/18870	0.000511282	0.00360014	0.00233959	3122/3123/3726/3606/64332/8767/942/1880	8
950	Mac_T	GO:0002293	alpha-beta T cell differentiation involved in immune response	8/459	76/18870	0.000511282	0.00360014	0.00233959	3122/3123/3726/3606/64332/8767/942/1880	8
951	Mac_T	GO:0016236	macroautophagy	19/459	331/18870	0.000512959	0.00360621	0.00234353	1509/26471/8878/527/8673/3091/3920/10533/11337/533/8767/526/3162/8992/9114/4864/523/7879/55207	19
952	Mac_T	GO:0001573	ganglioside metabolic process	5/459	28/18870	0.000515586	0.00360747	0.00234435	3074/2760/9334/3073/6482	5
953	Mac_T	GO:0006027	glycosaminoglycan catabolic process	5/459	28/18870	0.000515586	0.00360747	0.00234435	960/3074/2517/2799/3073	5
954	Mac_T	GO:0031664	regulation of lipopolysaccharide-mediated signaling pathway	5/459	28/18870	0.000515586	0.00360747	0.00234435	929/948/23643/9450/23328	5
955	Mac_T	GO:1904375	regulation of protein localization to cell periphery	11/459	137/18870	0.000529866	0.00370153	0.00240548	3958/1601/8878/55022/4035/8673/54209/23433/8650/6622/8417	11
956	Mac_T	GO:0045582	positive regulation of T cell differentiation	10/459	116/18870	0.000538713	0.00375739	0.00244178	972/3122/3123/9308/11006/3606/6850/64332/8767/942	10
957	Mac_T	GO:0032869	cellular response to insulin stimulus	14/459	206/18870	0.000540536	0.00376418	0.00244619	1509/2203/3553/55022/5872/5468/11031/23433/490/23191/5791/677/8837/4644	14
958	Mac_T	GO:0051347	positive regulation of transferase activity	22/459	414/18870	0.000548999	0.0038171	0.00248058	972/3123/348/3553/1622/23533/54209/3606/1958/23328/7099/805/920/942/6622/8826/51429/55704/2209/2268/1116/28984	22
959	Mac_T	GO:0034109	homotypic cell-cell adhesion	9/459	96/18870	0.000550282	0.00382001	0.00248248	928/5341/4067/5329/84034/8613/6850/5912/5962	9
960	Mac_T	GO:0050853	B cell receptor signaling pathway	8/459	77/18870	0.000558649	0.00387201	0.00251627	4792/4067/4332/4790/4208/6850/64332/975	8
961	Mac_T	GO:0032814	regulation of natural killer cell activation	6/459	43/18870	0.000569804	0.00393085	0.0025545	7305/3916/3133/3606/2268/639	6
962	Mac_T	GO:0033003	regulation of mast cell activation	6/459	43/18870	0.000569804	0.00393085	0.0025545	4067/8673/6850/8832/9846/2268	6
963	Mac_T	GO:1904646	cellular response to amyloid-beta	6/459	43/18870	0.000569804	0.00393085	0.0025545	5641/948/3383/4035/54209/7099	6
964	Mac_T	GO:0016042	lipid catabolic process	19/459	334/18870	0.000572425	0.00394277	0.00256225	348/341/427/7941/1593/11343/3988/3553/3074/2760/2517/4023/3073/26090/5337/313/7879/2717/6696	19
965	Mac_T	GO:0051017	actin filament bundle assembly	12/459	161/18870	0.000588814	0.00404936	0.00263152	4082/9839/5341/6281/56907/8829/221692/5962/23075/7791/55704/28984	12
966	Mac_T	GO:0032720	negative regulation of tumor necrosis factor production	8/459	78/18870	0.000609503	0.00418146	0.00271737	10457/54/706/140885/11006/54209/7099/11213	8
967	Mac_T	GO:0097066	response to thyroid hormone	5/459	29/18870	0.000610669	0.00418146	0.00271737	1520/1508/1512/1514/5962	5
968	Mac_T	GO:0070228	regulation of lymphocyte apoptotic process	7/459	60/18870	0.000610861	0.00418146	0.00271737	3958/972/4067/5027/3091/81704/6482	7
969	Mac_T	GO:0032956	regulation of actin cytoskeleton organization	19/459	337/18870	0.000637758	0.00434934	0.00282646	5341/822/3055/93663/4035/6281/6050/23433/342184/23191/2934/8829/29108/5962/23075/51429/55704/10602/28984	19
970	Mac_T	GO:0032488	Cdc42 protein signal transduction	4/459	17/18870	0.000639319	0.00434934	0.00282646	348/19/8829/57698	4
971	Mac_T	GO:0036005	response to macrophage colony-stimulating factor	4/459	17/18870	0.000639319	0.00434934	0.00282646	7097/54209/7099/6696	4
972	Mac_T	GO:1900120	regulation of receptor binding	4/459	17/18870	0.000639319	0.00434934	0.00282646	302/4318/8829/567	4
973	Mac_T	GO:0043254	regulation of protein-containing complex assembly	22/459	419/18870	0.000643995	0.00437066	0.00284032	3958/348/5341/822/948/3055/93663/19/54209/57600/342184/23191/6850/2934/29108/7099/64581/5962/6622/9659/51429/10602	22
974	Mac_T	GO:0006509	membrane protein ectodomain proteolysis	6/459	44/18870	0.000646407	0.00437066	0.00284032	348/3553/7077/5027/7133/51429	6
975	Mac_T	GO:1903307	positive regulation of regulated secretory pathway	6/459	44/18870	0.000646407	0.00437066	0.00284032	3689/3916/8673/6850/9846/2268	6
976	Mac_T	GO:1903426	regulation of reactive oxygen species biosynthetic process	6/459	44/18870	0.000646407	0.00437066	0.00284032	6648/948/1535/7099/6622/8837	6
977	Mac_T	GO:0050878	regulation of body fluid levels	20/459	365/18870	0.000663027	0.00447619	0.0029089	348/2207/928/5341/302/948/4067/308/5329/5328/4780/84034/1535/8673/966/3091/6850/5912/7099/7392	20
978	Mac_T	GO:0032092	positive regulation of protein binding	7/459	61/18870	0.000675831	0.00455568	0.00296056	348/302/4318/4035/8829/8767/567	7
979	Mac_T	GO:0008217	regulation of blood pressure	13/459	187/18870	0.000683771	0.00460218	0.00299078	1522/6446/8870/6648/5144/84034/5468/490/3398/5025/10159/59342/6196	13
980	Mac_T	GO:0002507	tolerance induction	5/459	30/18870	0.000718307	0.00482729	0.00313706	4067/3106/11006/3133/11213	5
981	Mac_T	GO:1903556	negative regulation of tumor necrosis factor superfamily cytokine production	8/459	80/18870	0.000722421	0.00484757	0.00315024	10457/54/706/140885/11006/54209/7099/11213	8
982	Mac_T	GO:0030574	collagen catabolic process	6/459	45/18870	0.00073075	0.00488124	0.00317212	1520/1471/1508/1514/4318/1513	6
983	Mac_T	GO:0030890	positive regulation of B cell proliferation	6/459	45/18870	0.00073075	0.00488124	0.00317212	972/4208/975/7099/10673/1880	6
984	Mac_T	GO:0050856	regulation of T cell receptor signaling pathway	6/459	45/18870	0.00073075	0.00488124	0.00317212	3958/3988/11006/5795/975/7805	6
985	Mac_T	GO:0071901	negative regulation of protein serine/threonine kinase activity	9/459	100/18870	0.000741425	0.00494507	0.00321361	348/4067/3553/6546/5468/5795/29108/1843/11213	9
986	Mac_T	GO:0031098	stress-activated protein kinase signaling cascade	15/459	238/18870	0.000761165	0.00506909	0.0032942	4067/3553/6386/7538/6688/4790/11342/140885/54209/677/29108/1843/23328/8767/7099	15
987	Mac_T	GO:0002534	cytokine production involved in inflammatory response	8/459	81/18870	0.000784876	0.00520856	0.00338484	23646/140885/11006/54209/3091/29108/7099/64581	8
988	Mac_T	GO:1900015	regulation of cytokine production involved in inflammatory response	8/459	81/18870	0.000784876	0.00520856	0.00338484	23646/140885/11006/54209/3091/29108/7099/64581	8
989	Mac_T	GO:0002064	epithelial cell development	14/459	214/18870	0.00078682	0.00520856	0.00338484	7431/5144/2876/3553/3383/4643/5872/3091/4853/5962/2683/8826/22862/639	14
990	Mac_T	GO:0043270	positive regulation of monoatomic ion transport	14/459	214/18870	0.00078682	0.00520856	0.00338484	3958/1520/6347/6348/6351/706/5027/54209/490/5025/481/805/1230/6622	14
991	Mac_T	GO:0007160	cell-matrix adhesion	15/459	239/18870	0.000794493	0.00525149	0.00341274	967/948/3687/3689/5328/960/6281/342184/8829/146183/5795/54453/7791/3987/79834	15
992	Mac_T	GO:0002428	antigen processing and presentation of peptide antigen via MHC class Ib	4/459	18/18870	0.000806287	0.00527426	0.00342753	3105/3106/3133/567	4
993	Mac_T	GO:0002830	positive regulation of type 2 immune response	4/459	18/18870	0.000806287	0.00527426	0.00342753	972/3606/975/942	4
994	Mac_T	GO:0032604	granulocyte macrophage colony-stimulating factor production	4/459	18/18870	0.000806287	0.00527426	0.00342753	3553/3606/6850/8832	4
995	Mac_T	GO:0032645	regulation of granulocyte macrophage colony-stimulating factor production	4/459	18/18870	0.000806287	0.00527426	0.00342753	3553/3606/6850/8832	4
996	Mac_T	GO:0036035	osteoclast development	4/459	18/18870	0.000806287	0.00527426	0.00342753	7305/302/537/4853	4
997	Mac_T	GO:0042339	keratan sulfate metabolic process	4/459	18/18870	0.000806287	0.00527426	0.00342753	2799/10678/6482/10402	4
998	Mac_T	GO:0098751	bone cell development	4/459	18/18870	0.000806287	0.00527426	0.00342753	7305/302/537/4853	4
999	Mac_T	GO:0050890	cognition	18/459	317/18870	0.000809087	0.00528476	0.00343436	3122/348/6446/5641/728/2353/7832/2760/7097/54209/3091/4208/23191/4125/5176/567/123803/6310	18
1000	Mac_T	GO:0070050	neuron cellular homeostasis	7/459	63/18870	0.000822148	0.00534636	0.00347439	3074/537/9296/10159/526/9114/523	7
1001	Mac_T	GO:0032768	regulation of monooxygenase activity	6/459	46/18870	0.000823354	0.00534636	0.00347439	348/3553/4790/3091/6622/2717	6
1002	Mac_T	GO:0032892	positive regulation of organic acid transport	6/459	46/18870	0.000823354	0.00534636	0.00347439	3553/2180/5027/8564/5025/2170	6
1003	Mac_T	GO:1902622	regulation of neutrophil migration	6/459	46/18870	0.000823354	0.00534636	0.00347439	972/3576/728/719/4354/56833	6
1004	Mac_T	GO:0150117	positive regulation of cell-substrate junction organization	5/459	31/18870	0.000839512	0.00544329	0.00353738	6281/342184/8829/5795/3987	5
1005	Mac_T	GO:0051341	regulation of oxidoreductase activity	8/459	82/18870	0.000851598	0.00549551	0.00357131	348/3553/4790/3091/2230/6622/56833/2717	8
1006	Mac_T	GO:0030282	bone mineralization	10/459	123/18870	0.000852537	0.00549551	0.00357131	6348/5027/6546/5552/3091/4208/490/1230/92/2268	10
1007	Mac_T	GO:0032479	regulation of type I interferon production	10/459	123/18870	0.000852537	0.00549551	0.00357131	7305/929/140885/7097/10010/6850/3394/29108/8767/7099	10
1008	Mac_T	GO:0032606	type I interferon production	10/459	123/18870	0.000852537	0.00549551	0.00357131	7305/929/140885/7097/10010/6850/3394/29108/8767/7099	10
1009	Mac_T	GO:0008630	intrinsic apoptotic signaling pathway in response to DNA damage	9/459	102/18870	0.00085553	0.00550677	0.00357863	972/8870/6648/26471/960/597/57600/7133/29108	9
1010	Mac_T	GO:0071496	cellular response to external stimulus	19/459	346/18870	0.000873799	0.00561619	0.00364974	968/123/4067/2353/3553/4780/5027/4790/3920/10533/11337/7099/4023/1513/5337/2752/2350/7392/80315	19
1011	Mac_T	GO:0006631	fatty acid metabolic process	21/459	401/18870	0.000876907	0.00562799	0.00365741	972/341/427/948/11343/3988/2876/3553/2180/1622/5468/9444/4259/4023/6916/6622/26090/2879/313/2170/2171	21
1012	Mac_T	GO:0002753	cytosolic pattern recognition receptor signaling pathway	11/459	146/18870	0.000901586	0.00576082	0.00374373	4792/948/55577/118788/54209/29108/144811/8767/7099/51296/81622	11
1013	Mac_T	GO:0030225	macrophage differentiation	7/459	64/18870	0.000904119	0.00576082	0.00374373	3123/4318/6688/7097/3398/7099/920	7
1014	Mac_T	GO:0048247	lymphocyte chemotaxis	7/459	64/18870	0.000904119	0.00576082	0.00374373	6347/6348/6351/414062/6355/58191/1880	7
1015	Mac_T	GO:0062208	positive regulation of pattern recognition receptor signaling pathway	7/459	64/18870	0.000904119	0.00576082	0.00374373	929/948/1535/4814/55577/7099/51296	7
1016	Mac_T	GO:2000630	positive regulation of miRNA metabolic process	7/459	64/18870	0.000904119	0.00576082	0.00374373	2353/6688/4790/283131/5468/3091/1958	7
1017	Mac_T	GO:0035850	epithelial cell differentiation involved in kidney development	6/459	47/18870	0.00092475	0.00587535	0.00381816	4318/4643/10409/4208/4853/8826	6
1018	Mac_T	GO:0140353	lipid export from cell	6/459	47/18870	0.00092475	0.00587535	0.00381816	706/1601/3553/5027/5025/6696	6
1019	Mac_T	GO:0030149	sphingolipid catabolic process	5/459	32/18870	0.00097532	0.00617005	0.00400967	427/3074/2760/3073/2717	5
1020	Mac_T	GO:0032367	intracellular cholesterol transport	5/459	32/18870	0.00097532	0.00617005	0.00400967	10577/302/19/4864/55207	5
1021	Mac_T	GO:0070498	interleukin-1-mediated signaling pathway	5/459	32/18870	0.00097532	0.00617005	0.00400967	4792/3553/1958/11213/3557	5
1022	Mac_T	GO:0043903	regulation of biological process involved in symbiotic interaction	7/459	65/18870	0.000992395	0.00623945	0.00405478	972/3123/3956/3576/2934/10410/920	7
1023	Mac_T	GO:0045453	bone resorption	7/459	65/18870	0.000992395	0.00623945	0.00405478	54/5027/6850/1200/1513/7879/6696	7
1024	Mac_T	GO:2000117	negative regulation of cysteine-type endopeptidase activity	7/459	65/18870	0.000992395	0.00623945	0.00405478	1471/5329/4318/960/2876/831/6622	7
1025	Mac_T	GO:0048678	response to axon injury	8/459	84/18870	0.000998686	0.00623945	0.00405478	7305/2896/706/6648/4067/54209/5025/6696	8
1026	Mac_T	GO:0050871	positive regulation of B cell activation	8/459	84/18870	0.000998686	0.00623945	0.00405478	972/6688/4208/6850/975/7099/10673/1880	8
1027	Mac_T	GO:0001959	regulation of cytokine-mediated signaling pathway	12/459	171/18870	0.00100152	0.00623945	0.00405478	972/54502/25939/5468/54209/3091/6850/29108/7805/8767/11213/3557	12
1028	Mac_T	GO:0051897	positive regulation of phosphatidylinositol 3-kinase/protein kinase B signal transduction	12/459	171/18870	0.00100152	0.00623945	0.00405478	6348/2876/23533/118788/54209/3606/9518/5025/5795/10870/2268/1116	12
1029	Mac_T	GO:0001845	phagolysosome assembly	4/459	19/18870	0.00100181	0.00623945	0.00405478	5027/55647/7879/55207	4
1030	Mac_T	GO:0002281	macrophage activation involved in immune response	4/459	19/18870	0.00100181	0.00623945	0.00405478	7305/2896/54209/6850	4
1031	Mac_T	GO:0035821	modulation of process of another organism	4/459	19/18870	0.00100181	0.00623945	0.00405478	5027/6850/6280/64581	4
1032	Mac_T	GO:1903428	positive regulation of reactive oxygen species biosynthetic process	4/459	19/18870	0.00100181	0.00623945	0.00405478	6648/948/1535/7099	4
1033	Mac_T	GO:0099003	vesicle-mediated transport in synapse	14/459	220/18870	0.00102858	0.00639714	0.00415725	115548/5027/537/23191/9296/10159/8650/526/6622/9114/5337/51429/523/1175	14
1034	Mac_T	GO:0042088	T-helper 1 type immune response	6/459	48/18870	0.00103549	0.00641305	0.00416759	3123/3553/3606/64332/8767/7099	6
1035	Mac_T	GO:0043277	apoptotic cell clearance	6/459	48/18870	0.00103549	0.00641305	0.00416759	7305/6347/948/4035/54209/8685	6
1036	Mac_T	GO:1900542	regulation of purine nucleotide metabolic process	6/459	48/18870	0.00103549	0.00641305	0.00416759	706/55022/54209/144811/6622/4199	6
1037	Mac_T	GO:0008154	actin polymerization or depolymerization	13/459	196/18870	0.00105629	0.00652365	0.00423946	5341/822/3055/93663/56907/342184/23191/2934/29108/5962/23075/51429/10602	13
1038	Mac_T	GO:0043123	positive regulation of canonical NF-kappaB signal transduction	13/459	196/18870	0.00105629	0.00652365	0.00423946	972/3123/3956/9516/948/3553/6275/8767/7099/3162/64581/920/8837	13
1039	Mac_T	GO:0001666	response to hypoxia	17/459	298/18870	0.00106388	0.00656131	0.00426394	1536/6648/2353/5328/4780/5468/7097/54209/3091/1958/677/7423/3162/7009/4000/8837/28984	17
1040	Mac_T	GO:0009615	response to virus	22/459	436/18870	0.00108174	0.00666222	0.00432951	10577/6351/3687/3553/4790/6039/25939/8673/7097/54209/3091/10010/10533/3460/29108/6355/10410/3459/11213/1687/81622/2268	22
1041	Mac_T	GO:0050854	regulation of antigen receptor-mediated signaling pathway	7/459	66/18870	0.00108731	0.0066779	0.00433971	3958/4067/3988/11006/5795/975/7805	7
1042	Mac_T	GO:1905953	negative regulation of lipid localization	7/459	66/18870	0.00108731	0.0066779	0.00433971	341/4792/706/4790/5468/19/54209	7
1043	Mac_T	GO:0051092	positive regulation of NF-kappaB transcription factor activity	11/459	150/18870	0.00112521	0.00688213	0.00447242	948/3553/7097/3606/29108/6280/8767/7099/64581/11213/8837	11
1044	Mac_T	GO:0036336	dendritic cell migration	5/459	33/18870	0.00112679	0.00688213	0.00447242	6688/1230/81704/56833/1880	5
1045	Mac_T	GO:0045577	regulation of B cell differentiation	5/459	33/18870	0.00112679	0.00688213	0.00447242	6688/6850/3398/677/56833	5
1046	Mac_T	GO:0050869	negative regulation of B cell activation	5/459	33/18870	0.00112679	0.00688213	0.00447242	7305/4067/4332/3398/7805	5
1047	Mac_T	GO:0006140	regulation of nucleotide metabolic process	6/459	49/18870	0.00115612	0.00704185	0.00457622	706/55022/54209/144811/6622/4199	6
1048	Mac_T	GO:0046596	regulation of viral entry into host cell	6/459	49/18870	0.00115612	0.00704185	0.00457622	972/3123/3956/2934/10410/920	6
1049	Mac_T	GO:0099504	synaptic vesicle cycle	13/459	198/18870	0.00115879	0.0070484	0.00458048	115548/5027/537/23191/9296/10159/526/6622/9114/5337/51429/523/1175	13
1050	Mac_T	GO:0008625	extrinsic apoptotic signaling pathway via death domain receptors	8/459	86/18870	0.00116543	0.00705961	0.00458776	3958/2876/3383/6688/1612/11337/3162/8837	8
1051	Mac_T	GO:0033273	response to vitamin	8/459	86/18870	0.00116543	0.00705961	0.00458776	8942/706/6648/3988/2876/64332/2350/6696	8
1052	Mac_T	GO:2000628	regulation of miRNA metabolic process	8/459	86/18870	0.00116543	0.00705961	0.00458776	2353/6688/4790/283131/11006/5468/3091/1958	8
1053	Mac_T	GO:0006956	complement activation	7/459	67/18870	0.00118921	0.00719382	0.00467498	1675/3553/712/966/54209/2/28984	7
1054	Mac_T	GO:0022411	cellular component disassembly	24/459	497/18870	0.0011936	0.00721055	0.00468585	1520/1471/123/5341/706/822/4318/8878/4035/712/8673/54209/3091/3920/10533/11337/2934/1777/1513/5962/11213/23075/444/10154	24
1055	Mac_T	GO:0002526	acute inflammatory response	9/459	107/18870	0.00120421	0.00726466	0.00472102	26471/3988/3553/1051/9332/3133/2/2683/2209	9
1056	Mac_T	GO:0031214	biomineral tissue development	12/459	175/18870	0.00122322	0.00731085	0.00475103	6348/1051/5027/6546/5552/3091/4208/490/1230/92/2268/6696	12
1057	Mac_T	GO:0002577	regulation of antigen processing and presentation	4/459	20/18870	0.00122839	0.00731085	0.00475103	972/968/54209/29108	4
1058	Mac_T	GO:0032303	regulation of icosanoid secretion	4/459	20/18870	0.00122839	0.00731085	0.00475103	3553/5027/6850/5025	4
1059	Mac_T	GO:0042953	lipoprotein transport	4/459	20/18870	0.00122839	0.00731085	0.00475103	4481/948/4035/5468	4
1060	Mac_T	GO:0045655	regulation of monocyte differentiation	4/459	20/18870	0.00122839	0.00731085	0.00475103	972/3123/677/920	4
1061	Mac_T	GO:0051767	nitric-oxide synthase biosynthetic process	4/459	20/18870	0.00122839	0.00731085	0.00475103	6347/10135/7097/7099	4
1062	Mac_T	GO:0051769	regulation of nitric-oxide synthase biosynthetic process	4/459	20/18870	0.00122839	0.00731085	0.00475103	6347/10135/7097/7099	4
1063	Mac_T	GO:0140354	lipid import into cell	4/459	20/18870	0.00122839	0.00731085	0.00475103	948/3988/2180/2170	4
1064	Mac_T	GO:1903978	regulation of microglial cell activation	4/459	20/18870	0.00122839	0.00731085	0.00475103	6348/2896/1075/54209	4
1065	Mac_T	GO:1905146	lysosomal protein catabolic process	4/459	20/18870	0.00122839	0.00731085	0.00475103	4035/3920/29952/1200	4
1066	Mac_T	GO:1903509	liposaccharide metabolic process	9/459	108/18870	0.00128607	0.00761498	0.00494868	3074/2760/2517/9334/3073/313/6482/10402/2717	9
1067	Mac_T	GO:0030865	cortical cytoskeleton organization	6/459	50/18870	0.00128724	0.00761498	0.00494868	5341/114793/5872/23136/23433/8826	6
1068	Mac_T	GO:0001782	B cell homeostasis	5/459	34/18870	0.001295	0.00761498	0.00494868	972/4067/3091/4208/10673	5
1069	Mac_T	GO:0006691	leukotriene metabolic process	5/459	34/18870	0.001295	0.00761498	0.00494868	7097/6850/4048/2681/4259	5
1070	Mac_T	GO:0030212	hyaluronan metabolic process	5/459	34/18870	0.001295	0.00761498	0.00494868	960/3553/4790/3074/3073	5
1071	Mac_T	GO:0034383	low-density lipoprotein particle clearance	5/459	34/18870	0.001295	0.00761498	0.00494868	302/948/3988/54209/3162	5
1072	Mac_T	GO:0034405	response to fluid shear stress	5/459	34/18870	0.001295	0.00761498	0.00494868	4780/5027/19/4208/5025	5
1073	Mac_T	GO:0090022	regulation of neutrophil chemotaxis	5/459	34/18870	0.001295	0.00761498	0.00494868	972/3576/728/719/4354	5
1074	Mac_T	GO:0090075	relaxation of muscle	5/459	34/18870	0.001295	0.00761498	0.00494868	5144/6546/2934/5025/481	5
1075	Mac_T	GO:0001933	negative regulation of protein phosphorylation	17/459	304/18870	0.00132023	0.00775306	0.00503841	348/4067/5144/3553/55022/6546/140885/11006/5468/8613/116496/5795/29108/1843/805/6622/11213	17
1076	Mac_T	GO:0001935	endothelial cell proliferation	13/459	202/18870	0.0013888	0.00814492	0.00529306	348/6347/9839/3988/8828/5468/3091/4208/6678/8829/7423/3162/28984	13
1077	Mac_T	GO:0006816	calcium ion transport	22/459	445/18870	0.00140338	0.00821952	0.00534154	3958/6347/6348/6351/706/302/4067/5144/79026/5027/1535/6546/490/5025/8832/481/805/1230/6355/920/6622/7009	22
1078	Mac_T	GO:0032835	glomerulus development	7/459	69/18870	0.00141536	0.00827874	0.00538003	4643/10409/4208/1958/4853/8826/8837	7
1079	Mac_T	GO:0014910	regulation of smooth muscle cell migration	8/459	89/18870	0.0014564	0.00850755	0.00552873	6282/9732/5328/4780/4035/4208/8829/7099	8
1080	Mac_T	GO:0008637	apoptotic mitochondrial changes	9/459	110/18870	0.00146325	0.00852503	0.00554008	8870/6648/5329/4318/2876/597/400916/29108/4000	9
1081	Mac_T	GO:0010469	regulation of signaling receptor activity	9/459	110/18870	0.00146325	0.00852503	0.00554008	6347/5144/5328/1612/11006/5468/3091/4208/8829	9
1082	Mac_T	GO:0030224	monocyte differentiation	5/459	35/18870	0.00148103	0.00853731	0.00554806	972/3123/5468/677/920	5
1083	Mac_T	GO:0032366	intracellular sterol transport	5/459	35/18870	0.00148103	0.00853731	0.00554806	10577/302/19/4864/55207	5
1084	Mac_T	GO:0019370	leukotriene biosynthetic process	4/459	21/18870	0.00148853	0.00853731	0.00554806	6850/4048/2681/4259	4
1085	Mac_T	GO:0030502	negative regulation of bone mineralization	4/459	21/18870	0.00148853	0.00853731	0.00554806	6348/5552/3091/1230	4
1086	Mac_T	GO:0032495	response to muramyl dipeptide	4/459	21/18870	0.00148853	0.00853731	0.00554806	4792/7431/55577/8767	4
1087	Mac_T	GO:0033005	positive regulation of mast cell activation	4/459	21/18870	0.00148853	0.00853731	0.00554806	8673/6850/9846/2268	4
1088	Mac_T	GO:0044872	lipoprotein localization	4/459	21/18870	0.00148853	0.00853731	0.00554806	4481/948/4035/5468	4
1089	Mac_T	GO:0061318	renal filtration cell differentiation	4/459	21/18870	0.00148853	0.00853731	0.00554806	4643/10409/4853/8826	4
1090	Mac_T	GO:0071605	monocyte chemotactic protein-1 production	4/459	21/18870	0.00148853	0.00853731	0.00554806	3553/6850/8832/64581	4
1091	Mac_T	GO:0071637	regulation of monocyte chemotactic protein-1 production	4/459	21/18870	0.00148853	0.00853731	0.00554806	3553/6850/8832/64581	4
1092	Mac_T	GO:0072112	podocyte differentiation	4/459	21/18870	0.00148853	0.00853731	0.00554806	4643/10409/4853/8826	4
1093	Mac_T	GO:1903975	regulation of glial cell migration	4/459	21/18870	0.00148853	0.00853731	0.00554806	6348/54209/5025/1880	4
1094	Mac_T	GO:0031668	cellular response to extracellular stimulus	16/459	281/18870	0.00150559	0.00857431	0.00557211	968/123/4067/2353/4780/5027/3920/10533/11337/4023/1513/5337/2752/2350/7392/80315	16
1095	Mac_T	GO:0035747	natural killer cell chemotaxis	3/459	10/18870	0.00151049	0.00857431	0.00557211	6347/6348/6351	3
1096	Mac_T	GO:0061418	regulation of transcription from RNA polymerase II promoter in response to hypoxia	3/459	10/18870	0.00151049	0.00857431	0.00557211	4780/3091/1958	3
1097	Mac_T	GO:0070339	response to bacterial lipopeptide	3/459	10/18870	0.00151049	0.00857431	0.00557211	929/948/7097	3
1098	Mac_T	GO:0070432	regulation of nucleotide-binding oligomerization domain containing 2 signaling pathway	3/459	10/18870	0.00151049	0.00857431	0.00557211	55577/7099/51296	3
1099	Mac_T	GO:0071220	cellular response to bacterial lipoprotein	3/459	10/18870	0.00151049	0.00857431	0.00557211	929/948/7097	3
1100	Mac_T	GO:0071221	cellular response to bacterial lipopeptide	3/459	10/18870	0.00151049	0.00857431	0.00557211	929/948/7097	3
1101	Mac_T	GO:1903980	positive regulation of microglial cell activation	3/459	10/18870	0.00151049	0.00857431	0.00557211	6348/1075/54209	3
1102	Mac_T	GO:1901184	regulation of ERBB signaling pathway	7/459	70/18870	0.00154034	0.00873253	0.00567493	5641/5329/4318/5782/5795/55704/7879	7
1103	Mac_T	GO:0045860	positive regulation of protein kinase activity	16/459	282/18870	0.00156144	0.00884083	0.00574531	3553/23533/3606/1958/23328/7099/805/920/942/6622/8826/51429/55704/2209/1116/28984	16
1104	Mac_T	GO:0006968	cellular defense response	6/459	52/18870	0.00158325	0.00892999	0.00580325	7305/728/4688/23643/4332/4046	6
1105	Mac_T	GO:0010823	negative regulation of mitochondrion organization	6/459	52/18870	0.00158325	0.00892999	0.00580325	8870/706/2876/5468/10493/4000	6
1106	Mac_T	GO:0050819	negative regulation of coagulation	6/459	52/18870	0.00158325	0.00892999	0.00580325	348/928/302/308/5329/5328	6
1107	Mac_T	GO:0045580	regulation of T cell differentiation	12/459	181/18870	0.00163086	0.00918682	0.00597016	972/3122/3123/9308/3726/11006/3606/6850/64332/8767/942/639	12
1108	Mac_T	GO:0045600	positive regulation of fat cell differentiation	7/459	71/18870	0.00167375	0.00941642	0.00611936	1051/7538/5468/284207/3398/677/4023	7
1109	Mac_T	GO:0009636	response to toxic substance	15/459	258/18870	0.00170616	0.00958499	0.00622891	348/6348/6351/6648/26471/948/4067/2353/2876/4780/216/7097/6280/4259/2879	15
1110	Mac_T	GO:0010976	positive regulation of neuron projection development	11/459	158/18870	0.00171021	0.00958499	0.00622891	348/2896/4067/4780/23191/8829/6280/5176/950/91752/8837	11
1111	Mac_T	GO:0048284	organelle fusion	11/459	158/18870	0.00171021	0.00958499	0.00622891	302/597/55022/8673/5872/55647/10493/6622/8417/7879/55207	11
1112	Mac_T	GO:0071825	protein-lipid complex organization	6/459	53/18870	0.00174935	0.00979192	0.00636338	348/341/7941/19/4023/51429	6
1113	Mac_T	GO:0010888	negative regulation of lipid storage	4/459	22/18870	0.00178469	0.00993942	0.00645924	4792/5468/19/54209	4
1114	Mac_T	GO:0030449	regulation of complement activation	4/459	22/18870	0.00178469	0.00993942	0.00645924	3553/966/54209/2	4
1115	Mac_T	GO:0045624	positive regulation of T-helper cell differentiation	4/459	22/18870	0.00178469	0.00993942	0.00645924	3606/64332/8767/942	4
1116	Mac_T	GO:0072311	glomerular epithelial cell differentiation	4/459	22/18870	0.00178469	0.00993942	0.00645924	4643/10409/4853/8826	4
1117	Mac_T	GO:0001659	temperature homeostasis	12/459	183/18870	0.00178933	0.00995272	0.00646789	948/2876/3553/1051/8878/2180/216/3606/6850/1958/7099/2171	12
1118	Mac_T	GO:0016241	regulation of macroautophagy	11/459	159/18870	0.00179819	0.00998947	0.00649176	26471/527/3091/533/8767/526/3162/8992/9114/4864/523	11
1119	Mac_T	GO:0050886	endocrine process	8/459	92/18870	0.00180226	0.00999947	0.00649827	1522/706/1601/3553/5468/10159/6196/6696	8
1120	Mac_T	GO:0006024	glycosaminoglycan biosynthetic process	7/459	72/18870	0.00181596	0.0100629	0.00653949	9956/3553/4790/3073/10678/6482/10402	7
1121	Mac_T	GO:0030833	regulation of actin filament polymerization	10/459	136/18870	0.00182868	0.0101207	0.00657702	822/3055/93663/342184/23191/2934/29108/5962/51429/10602	10
1122	Mac_T	GO:0006643	membrane lipid metabolic process	13/459	209/18870	0.00188233	0.0104046	0.00676152	5660/427/5027/3074/8613/2760/2517/9334/3073/10087/6482/10402/2717	13
1123	Mac_T	GO:0019216	regulation of lipid metabolic process	18/459	342/18870	0.00189365	0.0104541	0.00679369	972/348/5660/341/10577/706/427/1601/3553/4790/5468/54209/1958/3398/6622/2170/2268/2171	18
1124	Mac_T	GO:0070269	pyroptosis	5/459	37/18870	0.00191106	0.010537	0.00684761	9839/4814/54209/29108/1687	5
1125	Mac_T	GO:0010874	regulation of cholesterol efflux	6/459	54/18870	0.00192834	0.0105927	0.00688377	348/4792/4035/5468/19/54209	6
1126	Mac_T	GO:0043303	mast cell degranulation	6/459	54/18870	0.00192834	0.0105927	0.00688377	4067/8673/6850/8832/9846/2268	6
1127	Mac_T	GO:0070169	positive regulation of biomineral tissue development	6/459	54/18870	0.00192834	0.0105927	0.00688377	1051/5027/6546/4208/490/92	6
[truncated: 706 more rows]
