# Supplementary material for: T cell-mediated SIV dissemination into the CNS: a single-cell transcriptomic analysis
Source: Research Square preprint supplement (doi:10.21203/rs.3.rs-6537361/v1), 2025-05-09
Supplement: Supplementary file 5 [file 4f4ea9e5c0dac5b0b552d70a.xlsx]

## Sheet: Brain or blood samples
sample ID	Estimated Number of Cells	Mean Reads per Cell	Median Genes per Cell	Number of Reads	Valid Barcodes	Sequencing Saturation	Q30 Bases in Barcode	Q30 Bases in RNA Read	Q30 Bases in UMI	Reads Mapped to Genome	Reads Mapped Confidently to Genome	Reads Mapped Confidently to Intergenic Regions	Reads Mapped Confidently to Intronic Regions	Reads Mapped Confidently to Exonic Regions	Reads Mapped Confidently to Transcriptome	Reads Mapped Antisense to Gene	Fraction Reads in Cells	Total Genes Detected	Median UMI Counts per Cell
92T_CD45_H_1	7529	52975	2783	398847208	0.963	0.74	0.944	0.928	0.94	0.941	0.878	0.114	0.424	0.341	0.568	0.192	0.895	26572	6058
92T_CD45_H_2	8559	48565	2691	415668626	0.965	0.749	0.946	0.93	0.943	0.948	0.887	0.111	0.417	0.359	0.592	0.18	0.918	26606	5665
92T_CD4_H	7769	41111	3242	319389758	0.974	0.626	0.969	0.951	0.967	0.881	0.785	0.084	0.242	0.46	0.641	0.057	0.957	24952	9146
93T_CD45_SIV_1	9031	38605	2698	348641000	0.968	0.639	0.946	0.93	0.944	0.95	0.872	0.092	0.359	0.42	0.632	0.143	0.901	26841	5988
93T_CD45_SIV_2	8249	43666	2732	360201430	0.966	0.655	0.945	0.938	0.942	0.949	0.871	0.093	0.368	0.41	0.622	0.151	0.843	26700	6091
93T_CD4_SIV	6625	63550	2628	421019882	0.98	0.795	0.975	0.956	0.973	0.962	0.836	0.077	0.329	0.429	0.611	0.144	0.95	24427	6517
94T_CD45_SIV_1	6211	64588	3263	401157837	0.967	0.724	0.947	0.937	0.944	0.947	0.897	0.105	0.506	0.286	0.594	0.195	0.878	26200	7981
94T_CD45_SIV_2	6400	66575	3274	426082774	0.965	0.731	0.946	0.936	0.944	0.95	0.9	0.104	0.509	0.287	0.594	0.199	0.885	26286	8106
94T_CD4_SIV	5400	77622	2452	419157104	0.977	0.837	0.969	0.947	0.967	0.956	0.831	0.089	0.272	0.47	0.619	0.116	0.941	23949	6470
95T_CD45_SIV_1	6632	66961	3407	444086592	0.963	0.709	0.947	0.936	0.944	0.948	0.893	0.114	0.477	0.302	0.585	0.191	0.885	26873	8481
95T_CD45_SIV_2	5855	73696	3306	431492502	0.966	0.751	0.945	0.933	0.942	0.949	0.894	0.113	0.477	0.304	0.588	0.189	0.897	26703	8044
95T_CD4_SIV	6833	57891	2325	395569051	0.979	0.796	0.961	0.937	0.96	0.965	0.849	0.088	0.308	0.453	0.629	0.126	0.95	24139	5883

## Sheet: Cell cocultivation
sample ID	Cells	Confidently mapped antisense	Confidently mapped reads in cells	Confidently mapped to exonic regions	Confidently mapped to genome	Confidently mapped to intergenic regions	Confidently mapped to intronic regions	Confidently mapped to transcriptome	Mapped to genome	Mean reads per cell	Median UMI counts per cell	Median genes per cell	Number of reads from cells called from this sample	Total genes detected	Cells detected in other samples	Cells detected in this sample	Number of reads	Number of short reads skipped	Q30 RNA read	Q30 UMI	Q30 barcodes	Cells per OCM barcode	Sample ID	UMIs per OCM barcode	Cells per OCM barcode	Sample ID	UMIs per OCM barcode	Cells per OCM barcode	Sample ID	UMIs per OCM barcode	Cells per OCM barcode	Sample ID	UMIs per OCM barcode	Cells	Confidently mapped antisense	Confidently mapped reads in cells	Confidently mapped to exonic regions	Confidently mapped to genome	Confidently mapped to intergenic regions	Confidently mapped to intronic regions	Confidently mapped to transcriptome	Mapped to genome	Mean reads per cell	Number of reads	Number of reads in the library	Sequencing saturation	Valid UMIs	Valid barcodes
CD95_Rep1	5557	0.038	0.814	0.682	0.923	0.05	0.19	0.83	0.972	21459	6906	3116	119249165	30481	20,407 (78.6%)	5,557 (21.4%)	972579404	0	0.928	0.946	0.948	3,028 (11.7%)	NoApop_rep1	71,318,881 (12.5%)	11,695 (45.0%)	NoApop_rep2	315,319,906 (55.4%)	5,557 (21.4%)	CD95_rep1	89,325,850 (15.7%)	5,684 (21.9%)	CD95_rep2	93,442,261 (16.4%)	25964	0.038	0.889	0.693	0.906	0.045	0.168	0.817	0.966	37459	972579404	972579404	0.265	1	0.96
CD95_Rep2	5684	0.037	0.833	0.712	0.93	0.046	0.173	0.843	0.972	22153	6768	3133	125919609	30479	20,280 (78.1%)	5,684 (21.9%)	972579404	0	0.928	0.946	0.948	3,028 (11.7%)	NoApop_rep1	71,318,881 (12.5%)	11,695 (45.0%)	NoApop_rep2	315,319,906 (55.4%)	5,557 (21.4%)	CD95_rep1	89,325,850 (15.7%)	5,684 (21.9%)	CD95_rep2	93,442,261 (16.4%)	25964	0.038	0.889	0.693	0.906	0.045	0.168	0.817	0.966	37459	972579404	972579404	0.265	1	0.96
Campto_Rep1	3778	0.034	0.869	0.75	0.936	0.045	0.141	0.852	0.976	23827	12928	3946	90017986	29386	16,913 (81.7%)	3,778 (18.3%)	742471920	0	0.923	0.946	0.948	3,778 (18.3%)	Campto_rep1	66,674,072 (14.8%)	6,816 (32.9%)	Campto_rep2	134,064,671 (29.8%)	5,527 (26.7%)	NoCoCul_rep1	136,186,186 (30.3%)	4,570 (22.1%)	NoCoCul_rep2	112,891,701 (25.1%)	20691	0.037	0.912	0.7	0.91	0.049	0.161	0.819	0.969	35884	742471920	742471920	0.24	1	0.959
Campto_Rep2	6816	0.038	0.874	0.71	0.932	0.043	0.178	0.846	0.975	27051	13782	4375	184382533	31347	13,875 (67.1%)	6,816 (32.9%)	742471920	0	0.923	0.946	0.948	3,778 (18.3%)	Campto_rep1	66,674,072 (14.8%)	6,816 (32.9%)	Campto_rep2	134,064,671 (29.8%)	5,527 (26.7%)	NoCoCul_rep1	136,186,186 (30.3%)	4,570 (22.1%)	NoCoCul_rep2	112,891,701 (25.1%)	20691	0.037	0.912	0.7	0.91	0.049	0.161	0.819	0.969	35884	742471920	742471920	0.24	1	0.959
NoApop_Rep1	3028	0.034	0.912	0.73	0.94	0.039	0.172	0.863	0.973	33896	17249	4779	102636997	29771	22,936 (88.3%)	3,028 (11.7%)	972579404	0	0.928	0.946	0.948	3,028 (11.7%)	NoApop_rep1	71,318,881 (12.5%)	11,695 (45.0%)	NoApop_rep2	315,319,906 (55.4%)	5,557 (21.4%)	CD95_rep1	89,325,850 (15.7%)	5,684 (21.9%)	CD95_rep2	93,442,261 (16.4%)	25964	0.038	0.889	0.693	0.906	0.045	0.168	0.817	0.966	37459	972579404	972579404	0.265	1	0.96
NoApop_Rep2	11695	0.036	0.921	0.717	0.937	0.039	0.18	0.857	0.973	39719	20699	5508	464513561	33081	14,269 (55.0%)	11,695 (45.0%)	972579404	0	0.928	0.946	0.948	3,028 (11.7%)	NoApop_rep1	71,318,881 (12.5%)	11,695 (45.0%)	NoApop_rep2	315,319,906 (55.4%)	5,557 (21.4%)	CD95_rep1	89,325,850 (15.7%)	5,684 (21.9%)	CD95_rep2	93,442,261 (16.4%)	25964	0.038	0.889	0.693	0.906	0.045	0.168	0.817	0.966	37459	972579404	972579404	0.265	1	0.96
NoCoCul_Rep1	5527	0.032	0.947	0.718	0.937	0.045	0.174	0.854	0.976	36032	21256	5887	199151405	30869	15,164 (73.3%)	5,527 (26.7%)	742471920	0	0.923	0.946	0.948	3,778 (18.3%)	Campto_rep1	66,674,072 (14.8%)	6,816 (32.9%)	Campto_rep2	134,064,671 (29.8%)	5,527 (26.7%)	NoCoCul_rep1	136,186,186 (30.3%)	4,570 (22.1%)	NoCoCul_rep2	112,891,701 (25.1%)	20691	0.037	0.912	0.7	0.91	0.049	0.161	0.819	0.969	35884	742471920	742471920	0.24	1	0.959
NoCoCul_Rep2	4570	0.033	0.942	0.726	0.941	0.043	0.172	0.86	0.976	35655	20508	5744	162945583	30295	16,121 (77.9%)	4,570 (22.1%)	742471920	0	0.923	0.946	0.948	3,778 (18.3%)	Campto_rep1	66,674,072 (14.8%)	6,816 (32.9%)	Campto_rep2	134,064,671 (29.8%)	5,527 (26.7%)	NoCoCul_rep1	136,186,186 (30.3%)	4,570 (22.1%)	NoCoCul_rep2	112,891,701 (25.1%)	20691	0.037	0.912	0.7	0.91	0.049	0.161	0.819	0.969	35884	742471920	742471920	0.24	1	0.959
