# Supplementary material for: T cell-mediated SIV dissemination into the CNS: a single-cell transcriptomic analysis
Source: Research Square preprint supplement (doi:10.21203/rs.3.rs-6537361/v1), 2025-05-09
Supplement: Supplementary file 6 [file 502748731aa616f5e373f736.docx]

**Supplementary Figures**

**T cell-mediated SIV dissemination into the CNS: a single-cell transcriptomic analysis**

Xiaoke Xu1, Meng Niu1, Benjamin G. Lamberty1, Katy Emanuel1, L. Daniel Estrella1, and Howard S. Fox1*

1Department of Neurological Sciences, University of Nebraska Medical Center, Omaha, Nebraska, USA

*Corresponding author

E-mail: [hfox@unmc.edu](mailto:hfox@unmc.edu) (HSF)

| 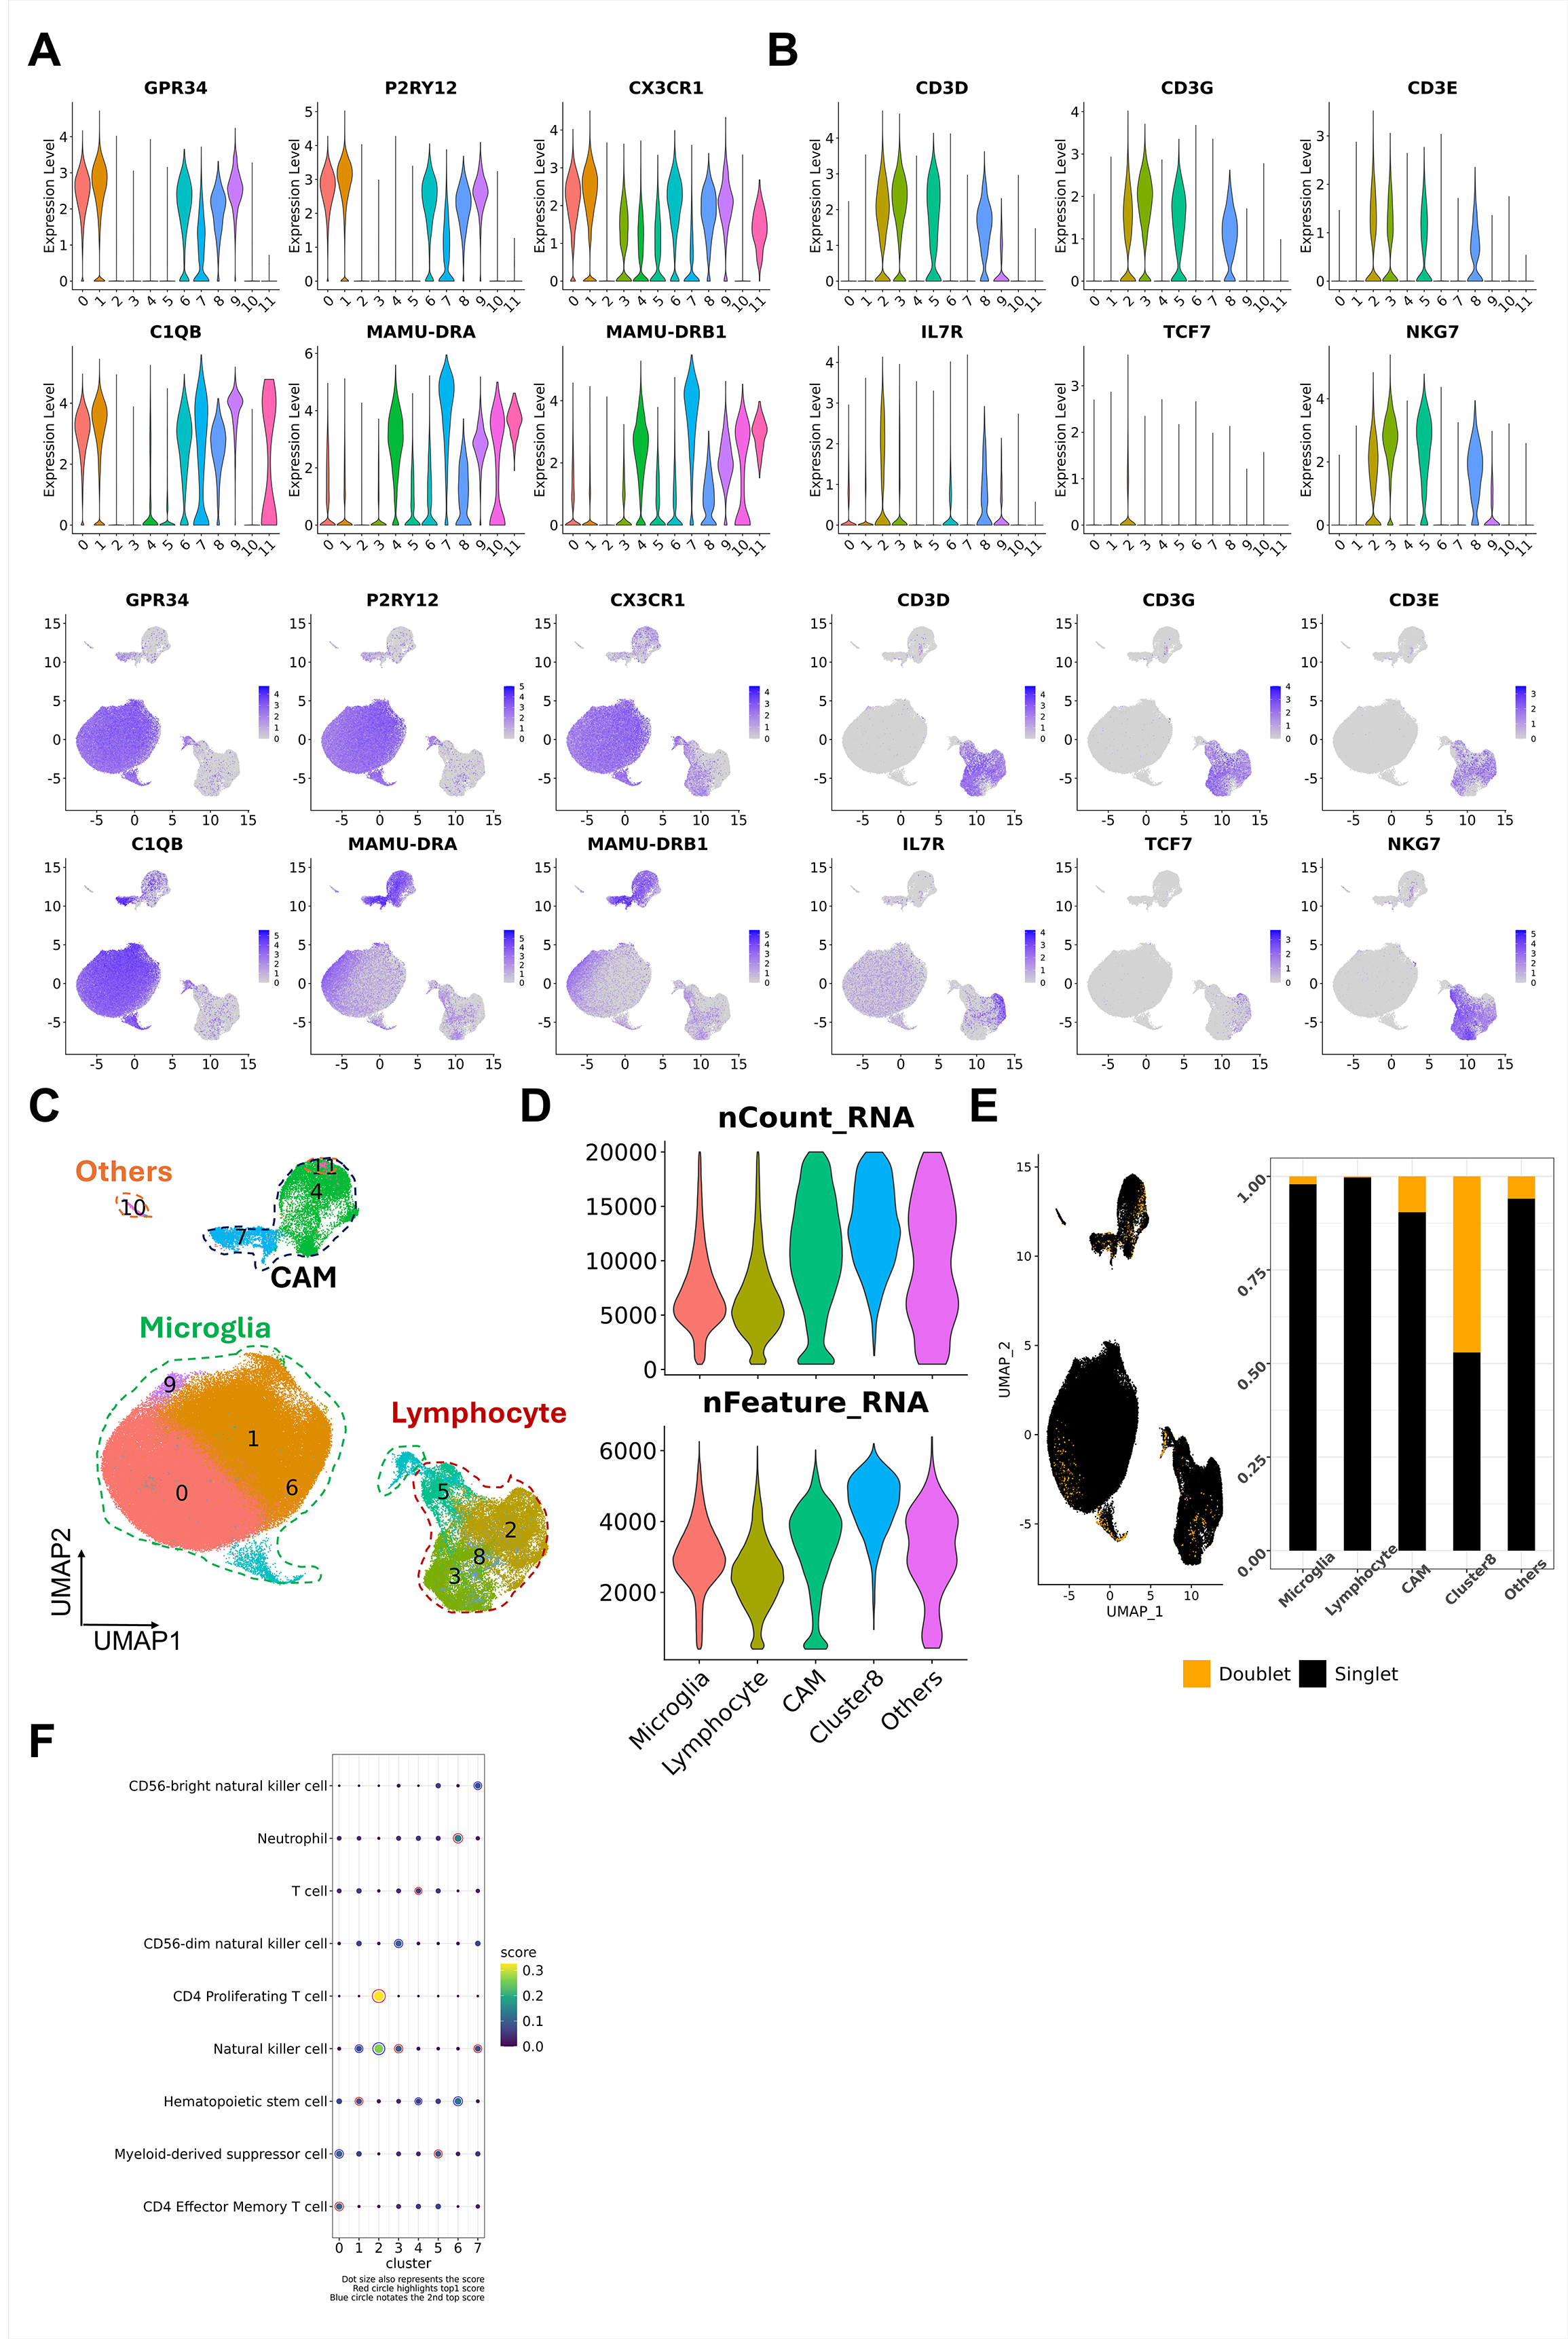 |
| --- |
| **Suppl. Fig. 1. The identification and characterization of CD45-sorted brain cell phenotypes. (A)** TheUMAP projection and violin plots of normalized RNA expression for known brain myeloid cell markers. **(B)** The UMAP projection and violin plots of normalized RNA expression for known lymphocyte markers. **(C)** The UMAP projection of 181,543 cells from acute-infected and uninfected brains. The annotation for each immune cell type was labeled. **(D)** Violin plots of UMI counts and gene counts for immune cell types identified in the brain dataset. **(E)** The inferred doublet and singlet in each cell cluster and cell type identified in the brain dataset. **(F)** The annotations generated by scRNA-seq automatic annotation tool scMayoMap. |

| 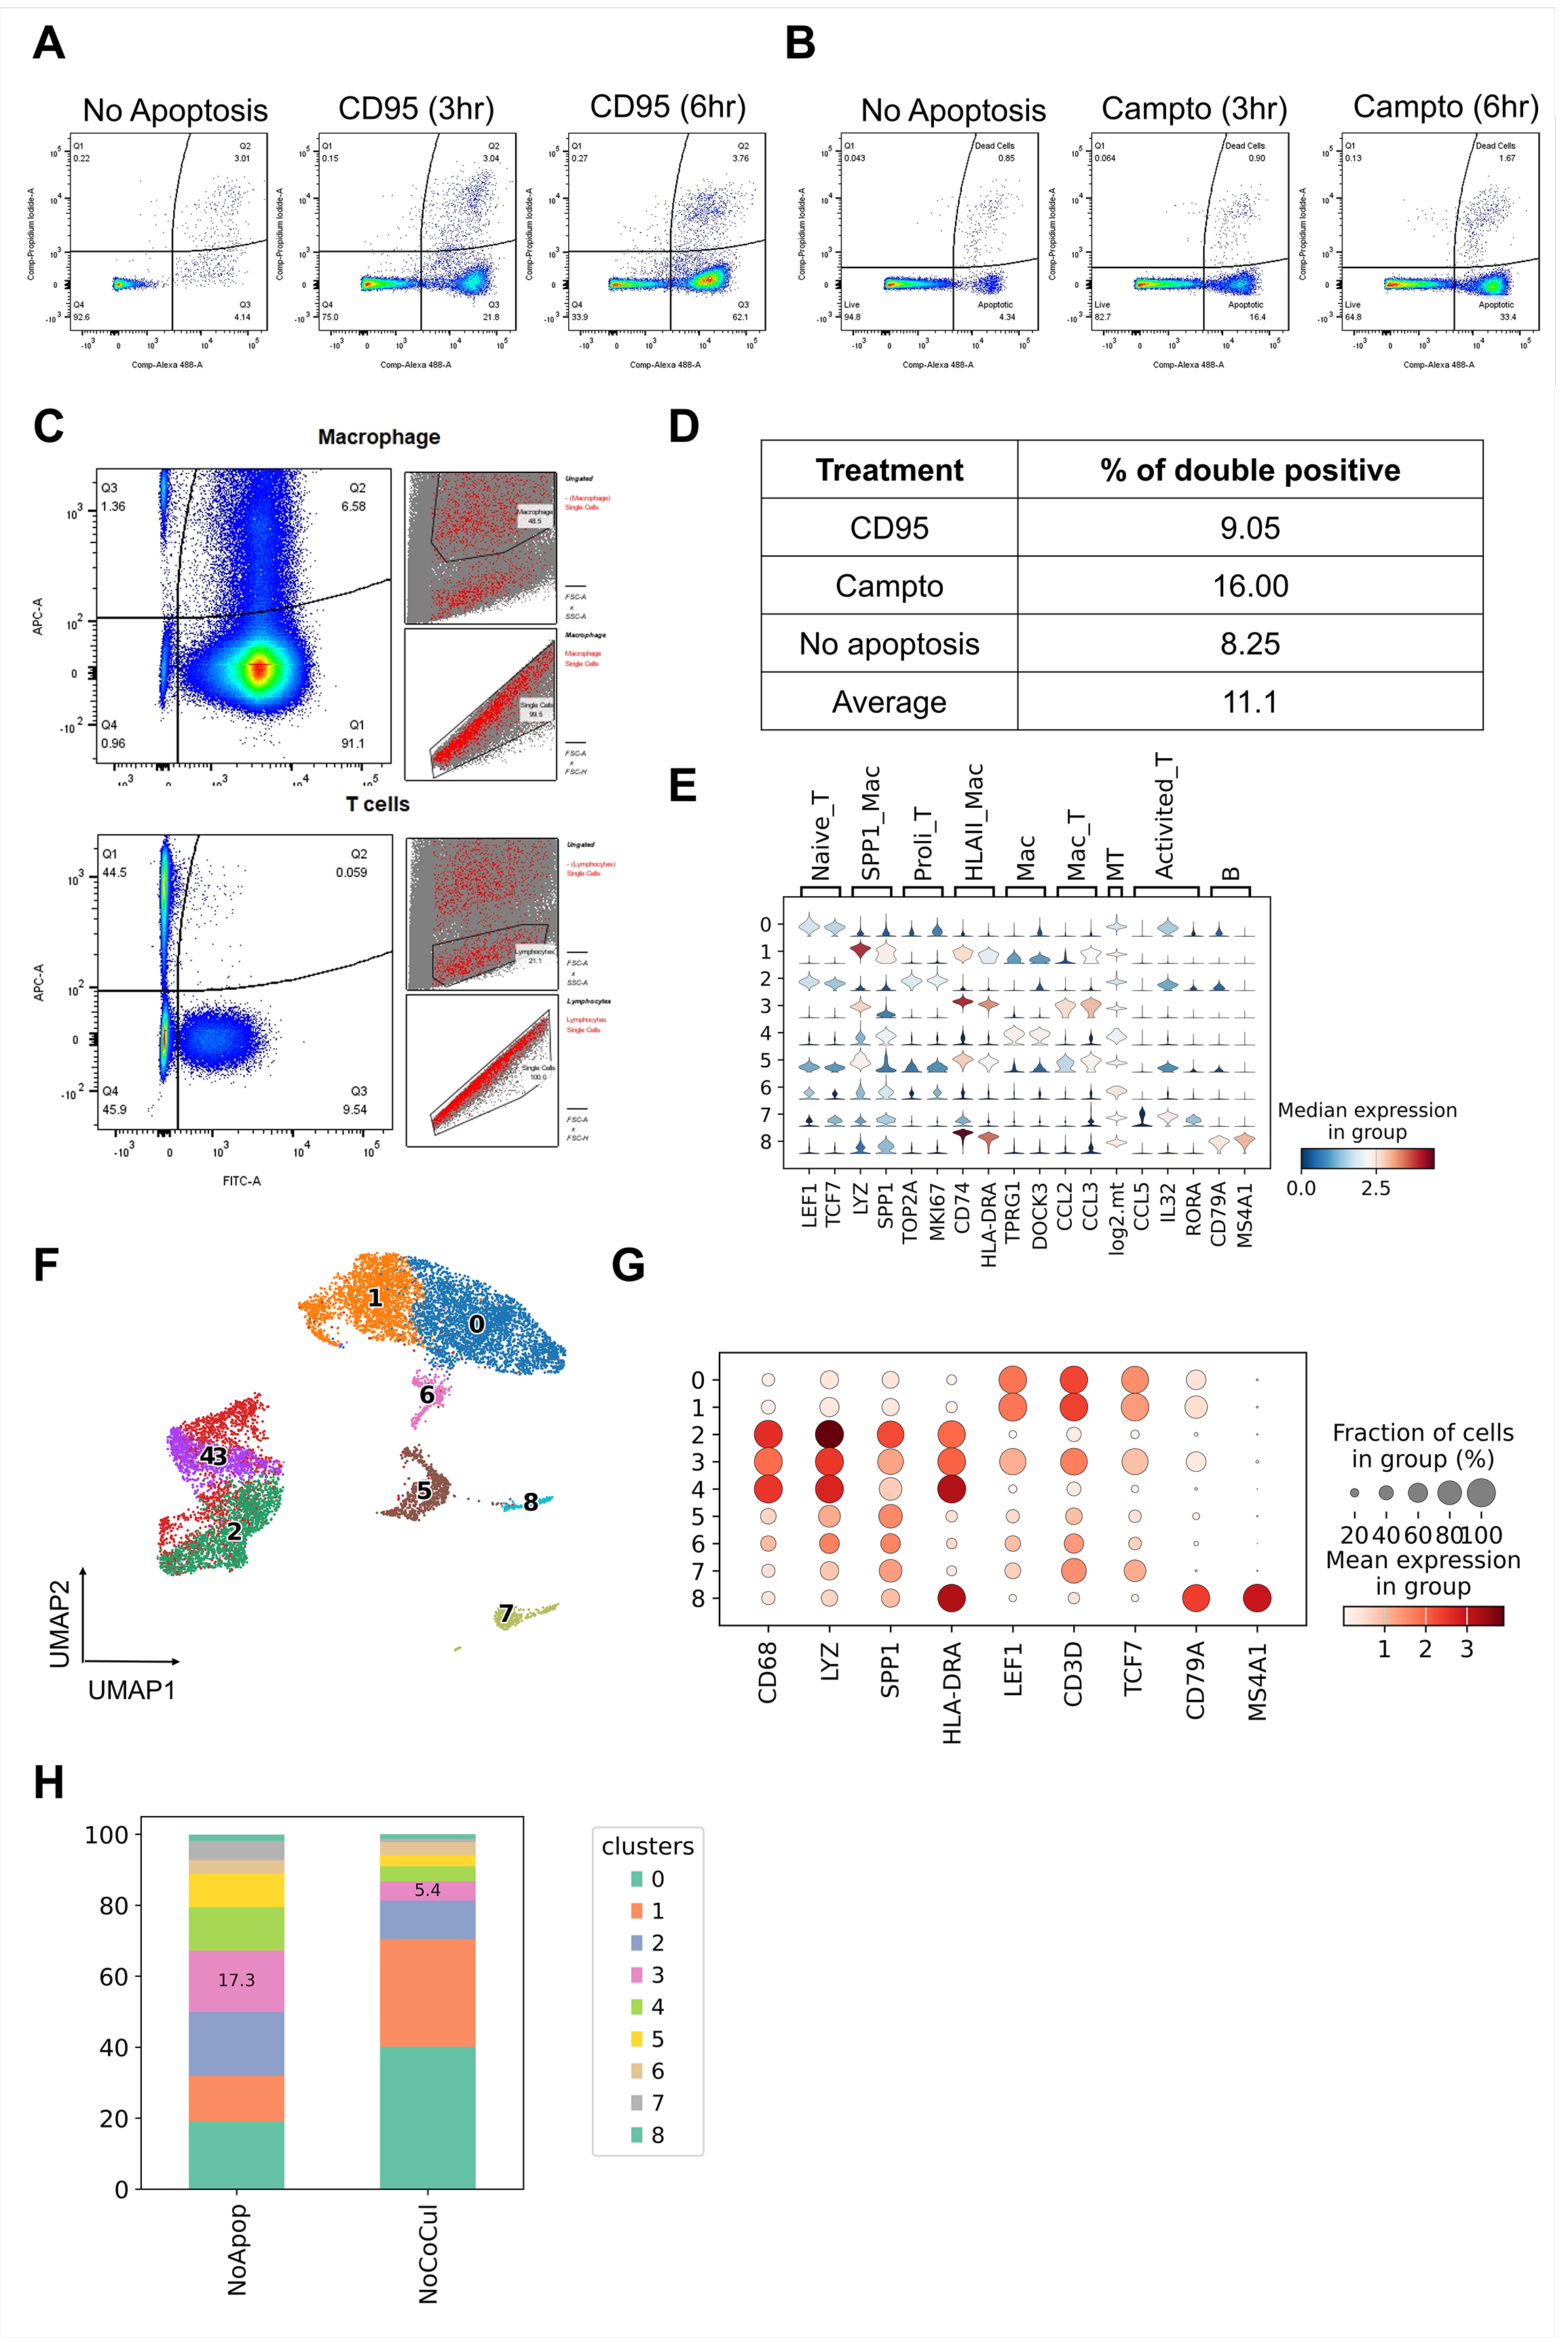 |
| --- |
| **Suppl. Fig. 2. The identification and characterization of macrophage-T-cell coexistence cells (Mac_T) . (A-B)** Flow cytometry data showing the percentage of live/dead/apoptotic jurkats with the 3hr or 6hr **(A)** CD95 or **(B)** Camptothecin treatment. The Jurkat cells without CD95 treatment was set as control.Q2: dead cells, Q3: apoptotic cells, Q4: live cells. **(C)** The flow cytometry showing the Mac_T cells in macrophage and T cell populations. The backgating plots for each population were shown on side. **(D)** The percentage of double positive macrophages (Mac_T cells) over all gated macrophage population (parent percentage) was calculated for each treatment. **(E)** Stacked bar plot showed the expression of cluster-specific markers. **(F)** The UMAP plot of 116,686 cells from NoApop and NoCoCul groups. The cells were colored by cluster information. **(G)** Characterization of each cluster by using macrophage, T cell and B cell markers. **(H)** The proportion of each in each experimental group. The percentage of Mac_T cell cluster (cluster 3) was labeled. Campto: camptothecin-treated MDM-Jurkat cocultivation group. CD95: CD95-treated MDM-Jurkat cocultivation group. NoApop: non-apoptosis MDM-Jurkat cocultivation group. NoCoCul: no-cocultivation MDM-Jurkat cocultivation group. |

| 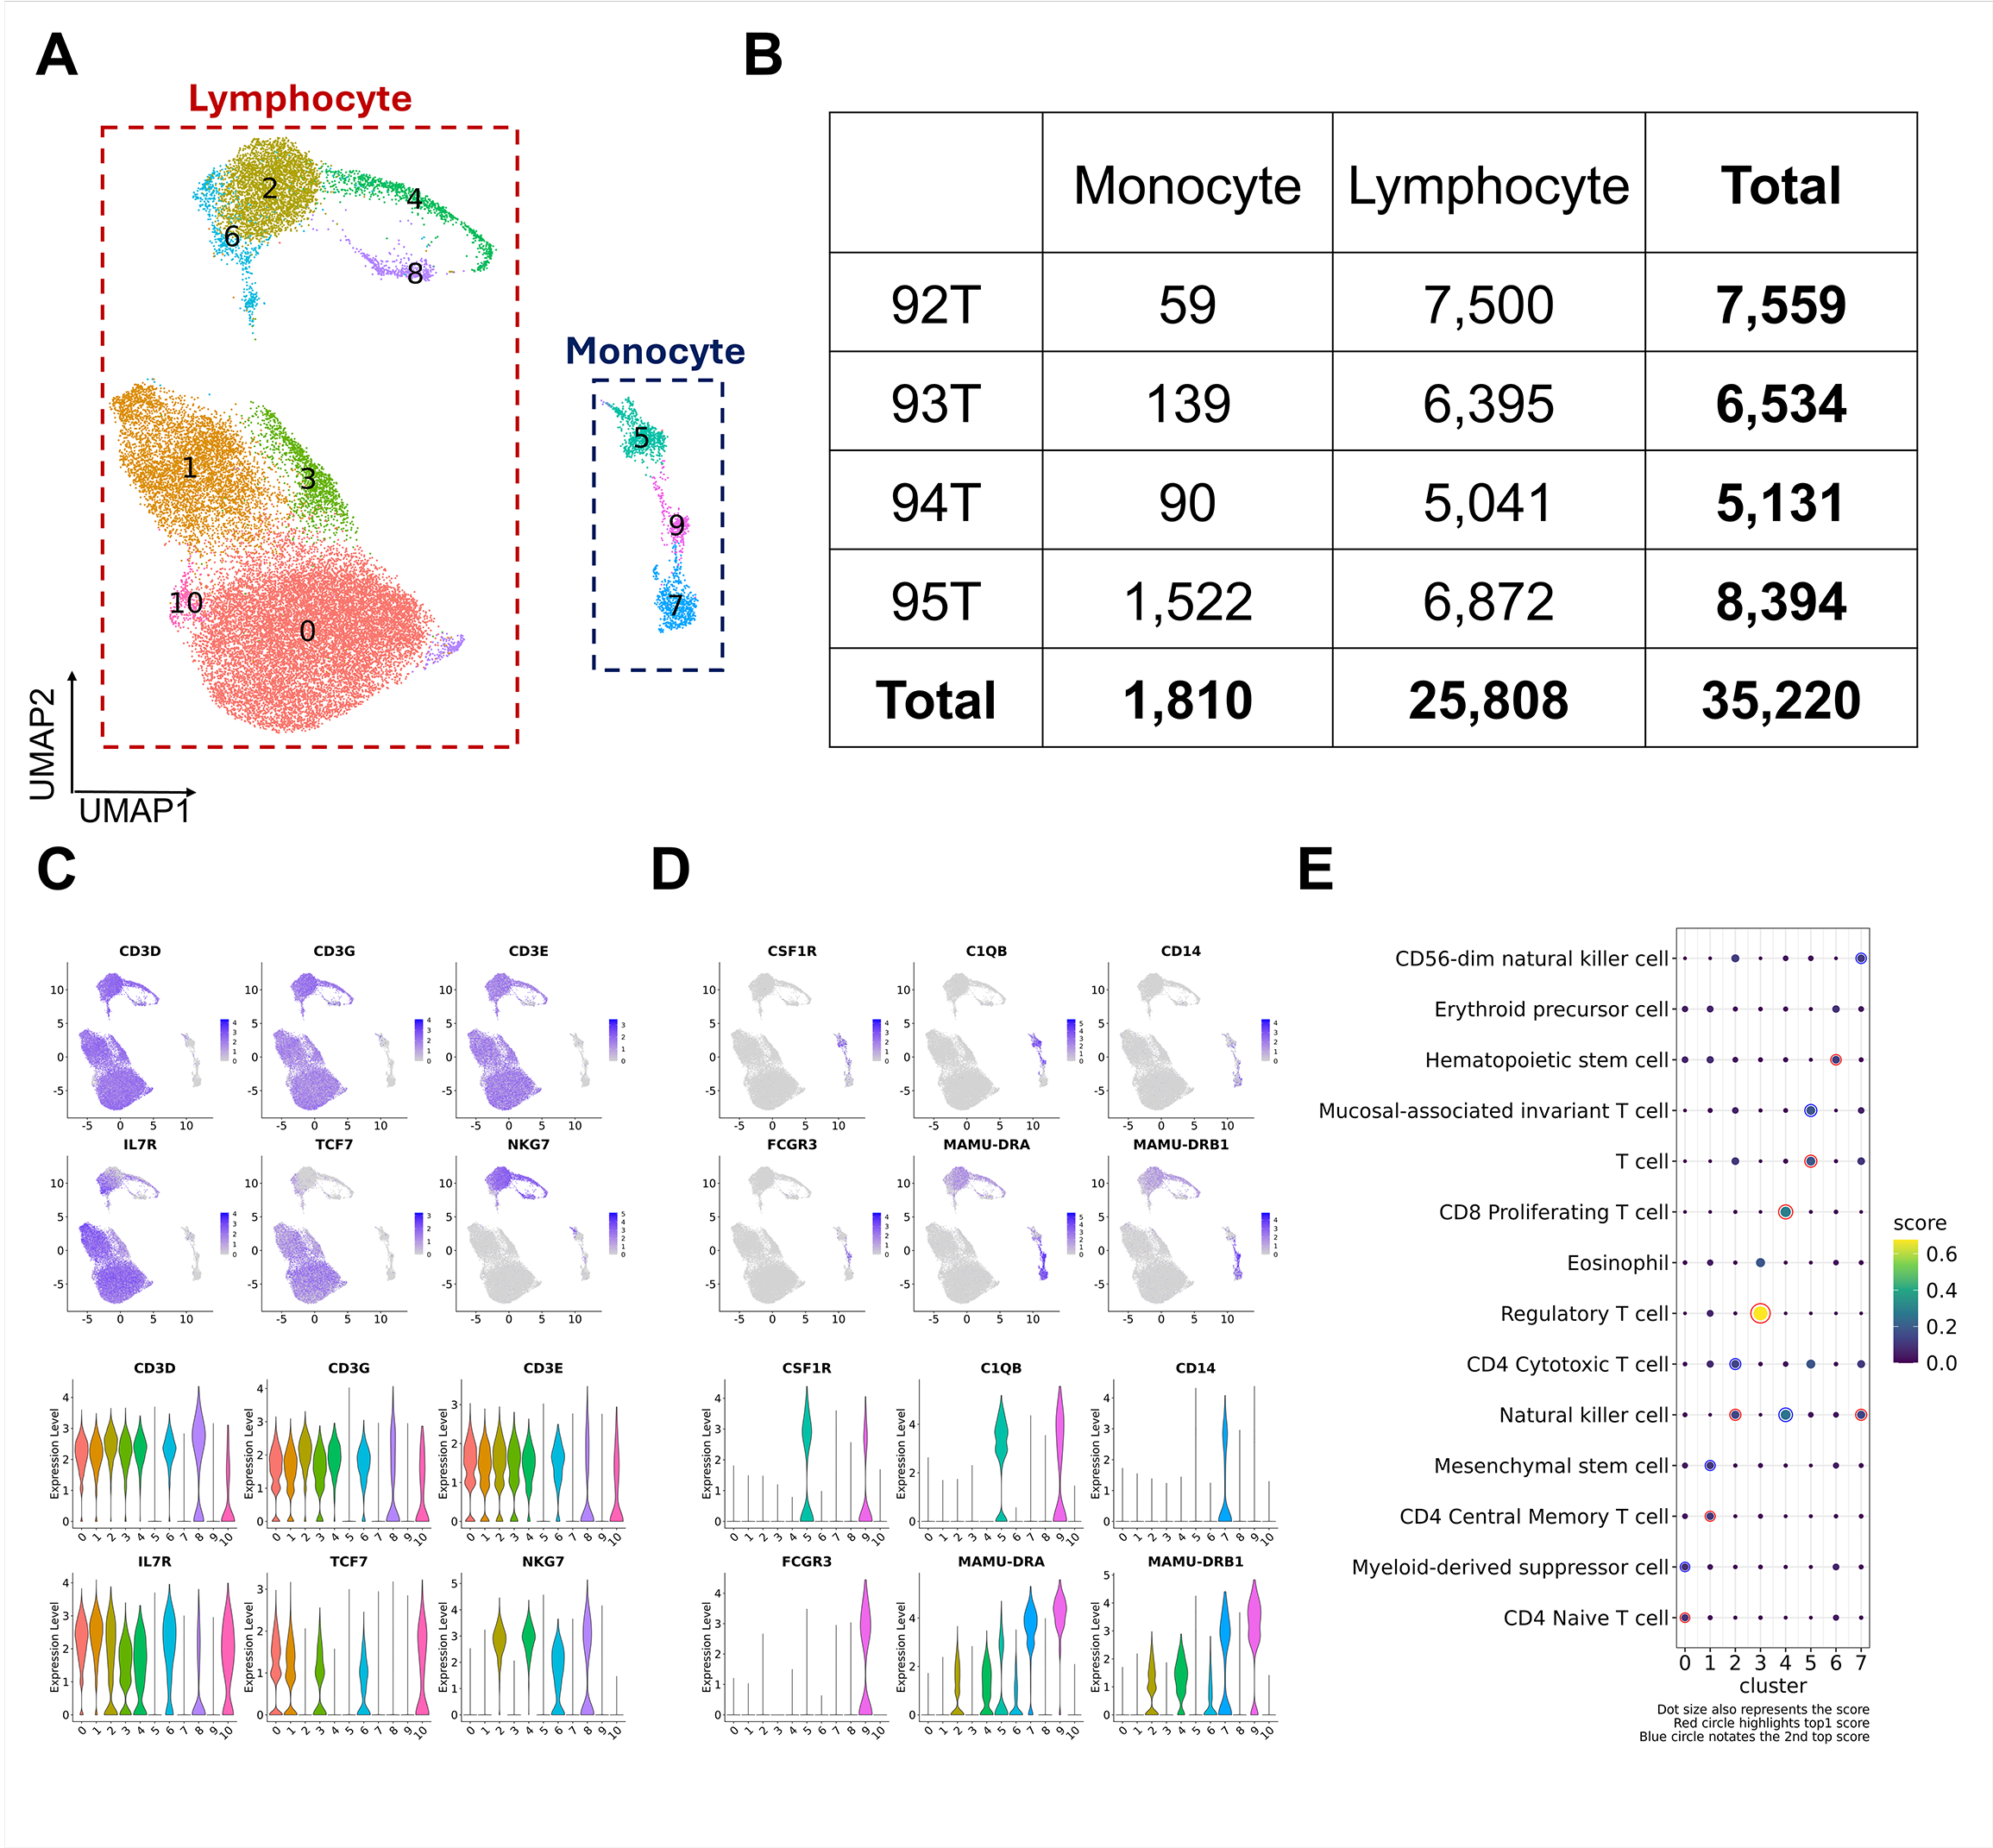 |
| --- |
| **Suppl. Fig. 3.** **The identification and characterization of CD4-sorted blood cell phenotypes. (A)** The UMAP projection of 35,220 cells from acute-infected and uninfected blood. The annotation for lymphocytes and monocytes was labeled. **(B)** The number of cells involved in different cell phenotypes and individual animals. **(C)** UMAP projection and Violin plots of normalized RNA expression for known lymphocyte markers. **(D)** UMAP projection and Violin plots of normalized RNA expression for known monocyte marker. **(E)** The annotations generated by scRNA-seq automatic annotation tool scMayoMap. |

| 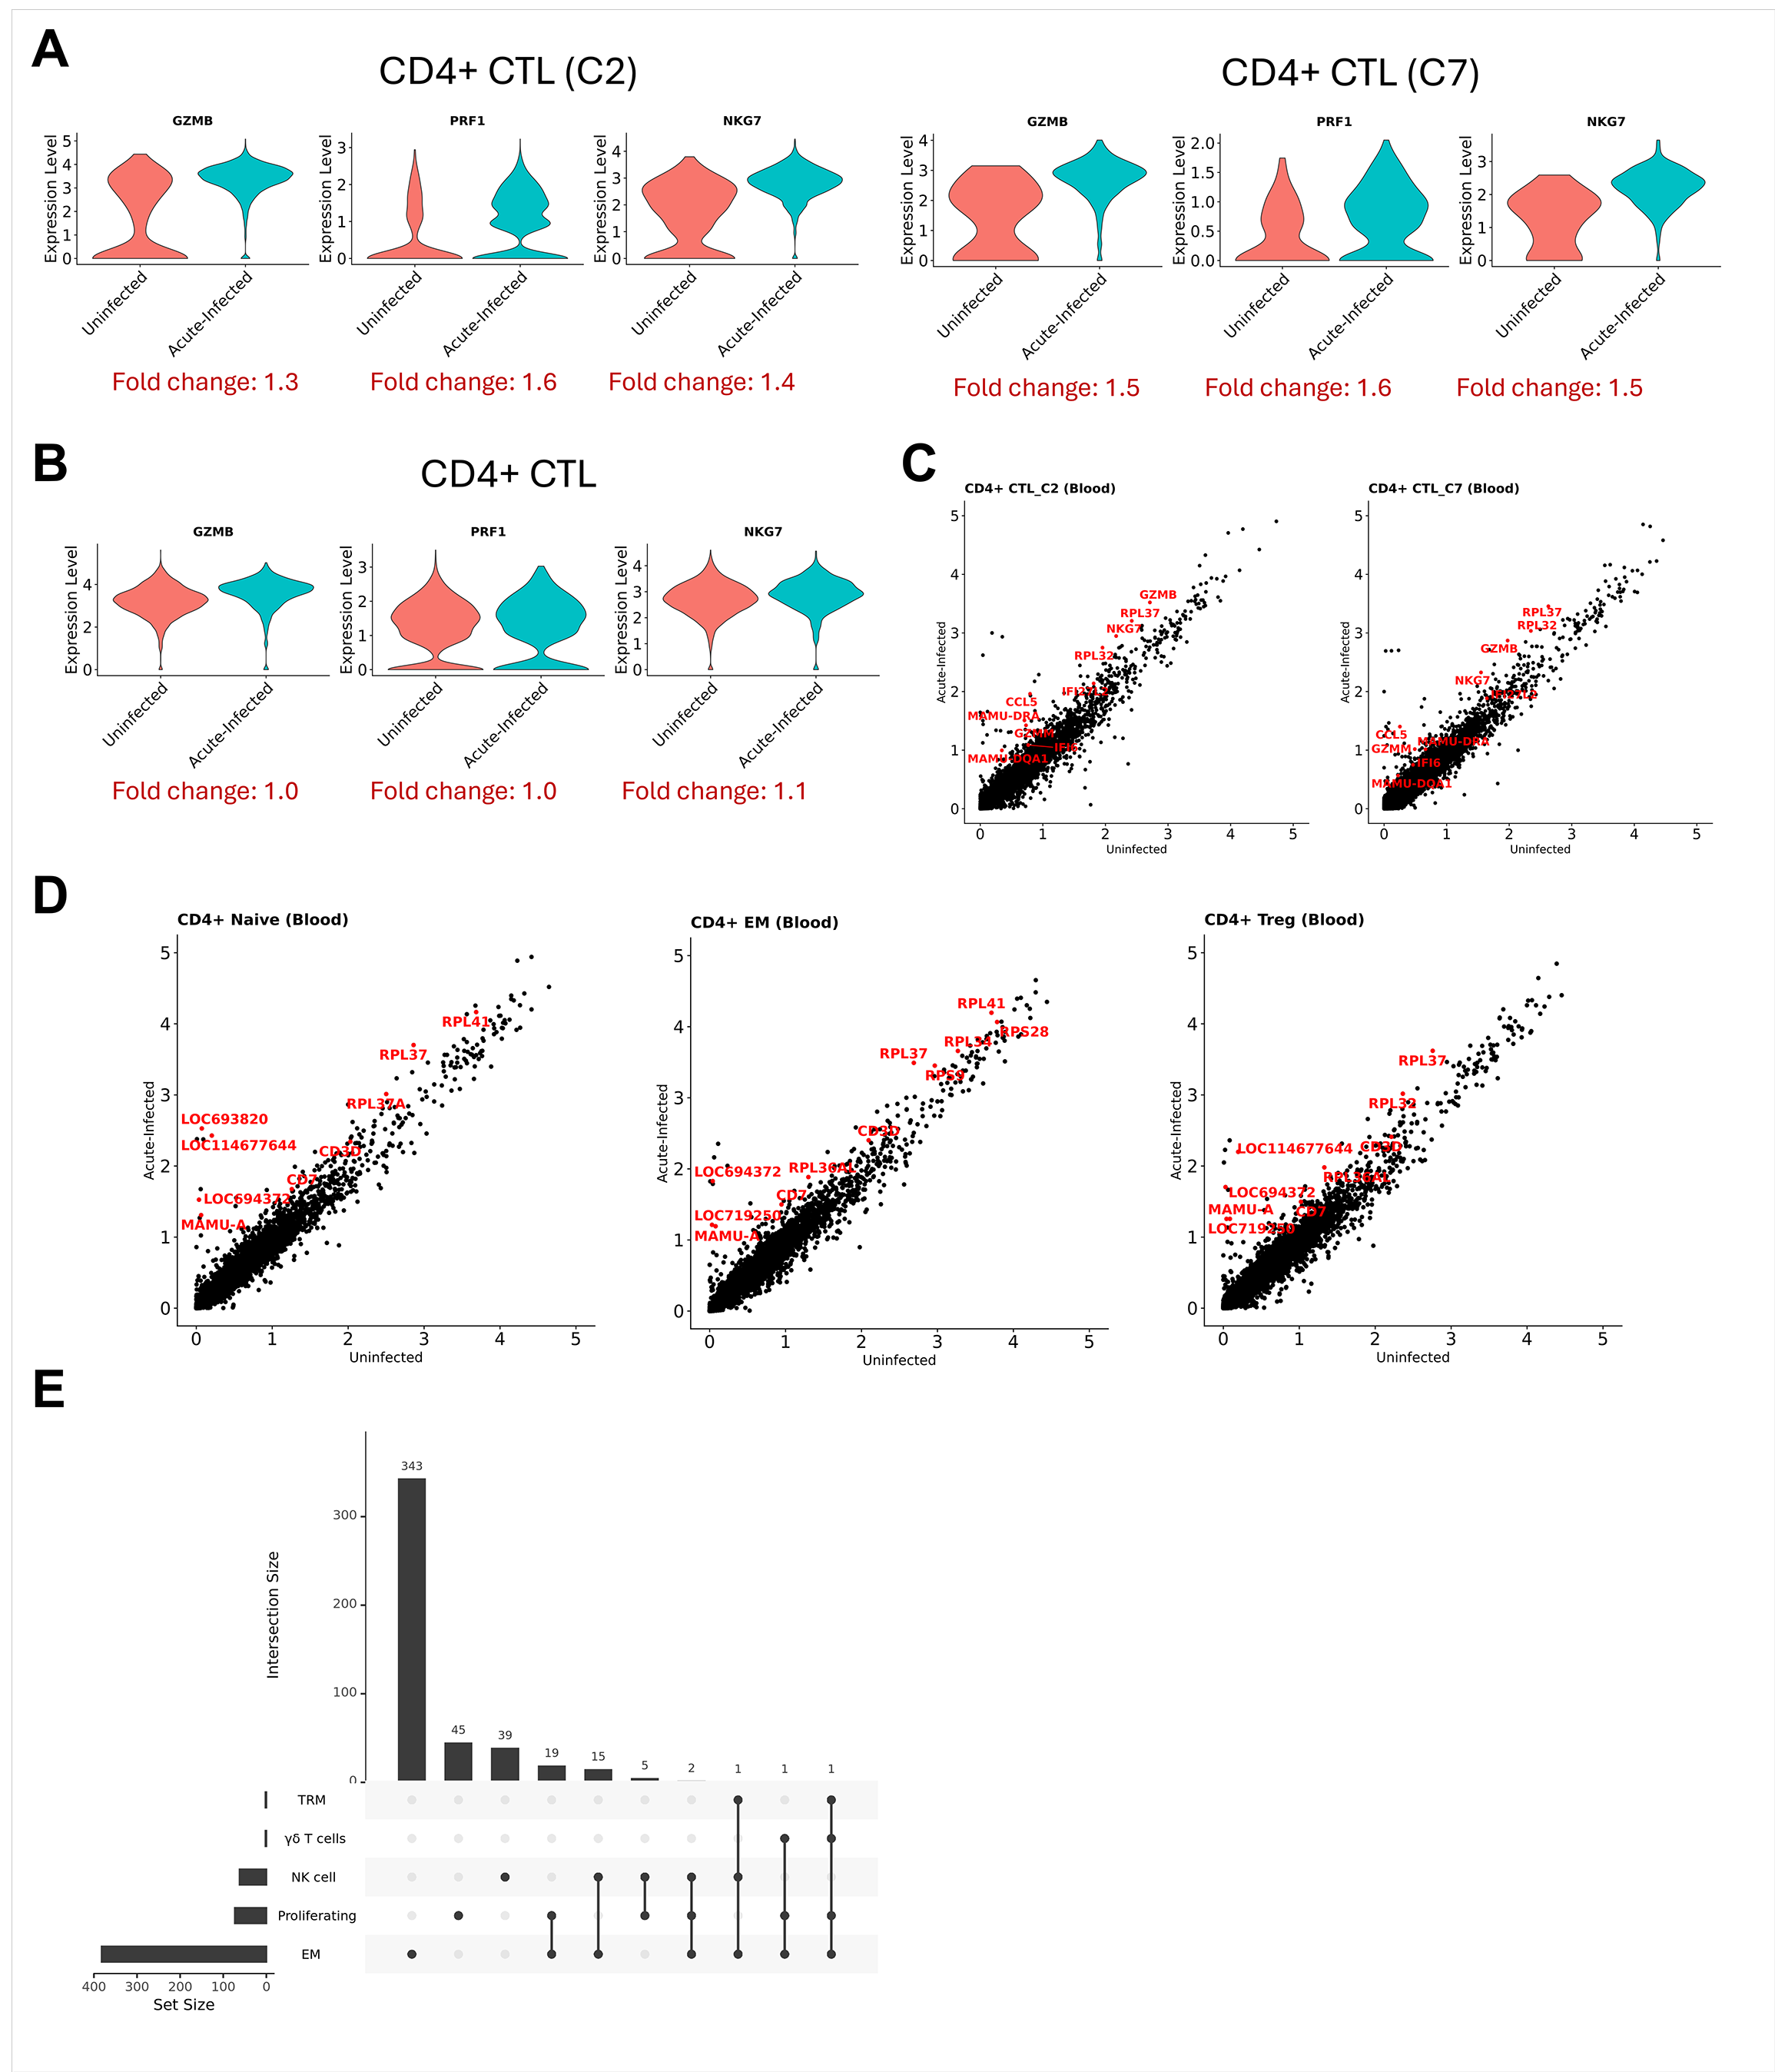 |
| --- |
| **Suppl. Fig. 4. The transcriptomic changes of non-cytotoxic CD4-sorted blood lymphocytes during acute SIV infection. (A-B)** The violin plot compared the gene expression of representative cytotoxic genes (GZMB, PRF1, NKG7) in the (A) blood and brain CD4+ CTL cluster between acute-infected and uninfected conditions. **(C)** The gene scatter plots compared average gene expression in the blood CD4+ CTL clusters between acute-infected and uninfected conditions. **(D)** The gene scatter plots compared average gene expression CD4+ naïve T cell, effector memory (EM) T cell, and regulatory T cell (Treg) clusters between acute-infected and uninfected conditions. The statistical test for marker detection between lymphocytes found in infected and uninfected animals was the Wilcoxon rank sum test with parameters as adjusted p-value < 0.05 and log2FC > 0.5. The representative marker genes were labeled red in the gene scatter plots. **(E)** Up-set plot displayed the number of significantly changed genes in pseudobulk comparisons that are shared across or unique to certain clusters. |

| 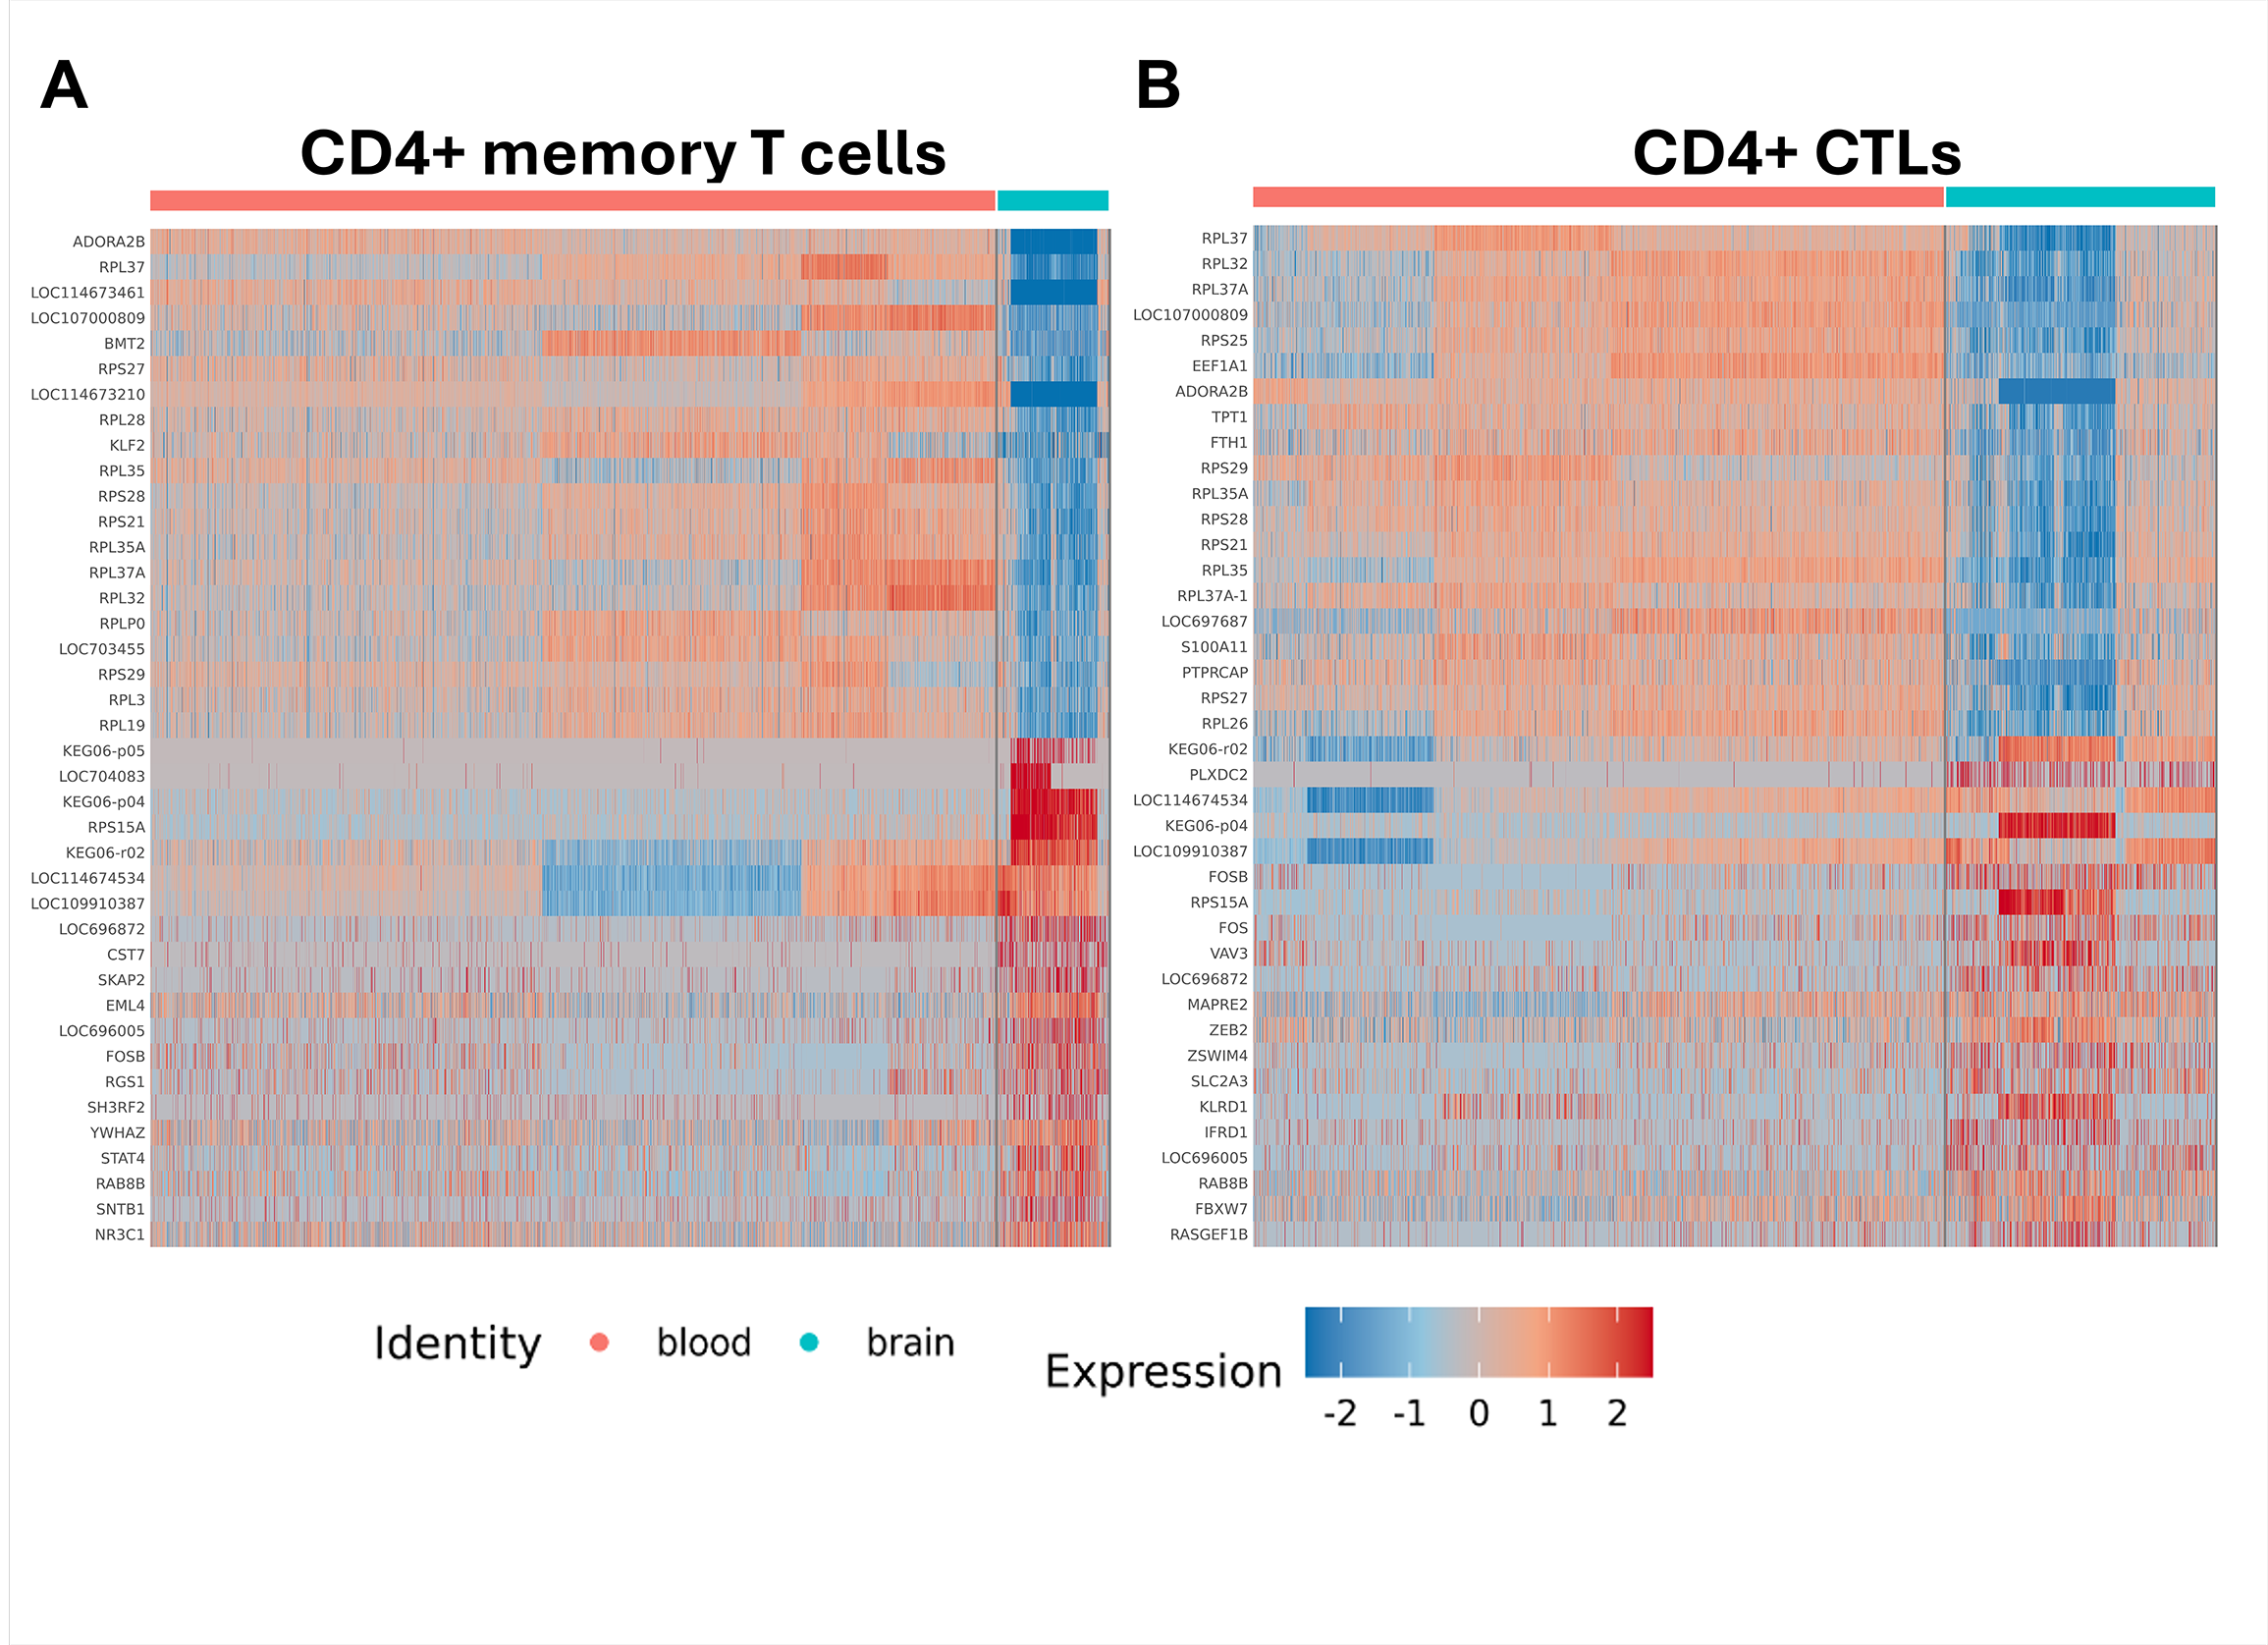 |
| --- |
| **Suppl. Fig. 5. Differentially expressed genes between blood and brain for the consistent phenotypes found in both tissues.** (A) DEGs for CD4+memory T cells (CD4+ TRM in the brain and CD4+ EM in the blood) (B) DEGs for CD4+ CTLs between brain and blood. The statistical test for marker detection was the Wilcoxon rank sum test with parameters as adjusted p-value < 0.05 and log2FC > 0.25, and top 20 markers in brain or blood were shown in the heatmap. |
