# Supplementary material for: T cell-mediated SIV dissemination into the CNS: a single-cell transcriptomic analysis
Source: Research Square preprint supplement (doi:10.21203/rs.3.rs-6537361/v1), 2025-05-09
Supplement: Supplementary file 7 [file 677e1e97e0952f409055c013.xlsx]

## Sheet: cluster 0
p_val	avg_log2FC	pct.1	pct.2	p_val_adj	cluster	gene
0	1.3443	0.992	0.628	0	0	SOX4
0	1.32992	0.94	0.569	0	0	TRBC1
0	1.28888	0.97	0.489	0	0	LEF1
0	1.22973	0.953	0.585	0	0	CD3D
0	1.20813	0.905	0.412	0	0	CD7
0	1.20495	0.975	0.475	0	0	CASC15
0	1.18501	0.936	0.457	0	0	MARCKSL1
0	1.1426	0.938	0.473	0	0	TCF7
0	1.13572	0.943	0.693	0	0	MIR181A1HG
0	1.13412	0.986	0.787	0	0	CDK6
0	1.10539	0.94	0.462	0	0	CD3G
0	1.05119	0.734	0.287	0	0	PI16
0	1.04482	0.969	0.518	0	0	MIR646HG
0	1.03593	0.945	0.439	0	0	CDH4
0	1.0315	0.974	0.849	0	0	HSPD1
0	1.00839	0.807	0.377	0	0	THEMIS
0	0.990999	0.942	0.469	0	0	LCK
0	0.985201	0.825	0.703	0	0	DNAJB1
0	0.985088	0.931	0.431	0	0	TOX
0	0.984909	0.973	0.707	0	0	SEPTIN6
0	0.984578	0.745	0.319	0	0	ENSG00000273118
0	0.964808	0.899	0.449	0	0	IL32
0	0.962264	0.816	0.386	0	0	ZC3H12B
0	0.95969	0.894	0.41	0	0	OCIAD2
0	0.958283	0.972	0.873	0	0	MIF
0	0.955191	0.819	0.372	0	0	CD1E
0	0.949731	0.902	0.438	0	0	IKZF2
0	0.946258	0.856	0.561	0	0	FXYD2
0	0.936947	0.882	0.398	0	0	LIME1
0	0.926107	0.889	0.385	0	0	ENSG00000263551
0	0.91808	0.841	0.388	0	0	ITM2A
0	0.915039	0.818	0.422	0	0	CCDC26
0	0.908271	0.954	0.78	0	0	STMN1
0	0.898299	0.987	0.921	0	0	HSP90AB1
0	0.892959	0.928	0.7	0	0	CCT2
0	0.892618	0.792	0.465	0	0	ID3
0	0.892056	0.906	0.505	0	0	ADA
0	0.88565	0.891	0.697	0	0	HSPH1
0	0.878059	0.921	0.55	0	0	TFDP2
0	0.877156	0.896	0.624	0	0	SNRPF
0	0.874464	0.853	0.386	0	0	ABLIM1
0	0.870988	0.909	0.679	0	0	SNRPE
0	0.865955	0.817	0.448	0	0	NME1
0	0.863401	0.961	0.76	0	0	CORO1A
0	0.859831	0.94	0.768	0	0	HSPE1
0	0.855204	0.968	0.75	0	0	SMARCC1
0	0.853606	0.957	0.867	0	0	ARHGDIB
0	0.852201	0.848	0.616	0	0	C1QBP
0	0.851781	0.91	0.631	0	0	SELENOW
0	0.851333	0.982	0.822	0	0	RB1
0	0.849869	0.961	0.843	0	0	HNRNPA1
0	0.840753	0.905	0.71	0	0	ITGA4
0	0.840361	0.931	0.477	0	0	ETS1
0	0.839654	0.955	0.664	0	0	SPTBN1
0	0.836823	0.998	0.957	0	0	HSP90AA1
0	0.833461	0.988	0.945	0	0	GAPDH
0	0.833259	0.859	0.385	0	0	TSPAN7
0	0.831809	0.807	0.413	0	0	LZTFL1
0	0.831779	0.917	0.452	0	0	CD3E
0	0.828316	0.82	0.379	0	0	MYB
0	0.825241	0.86	0.499	0	0	PPA1
0	0.821393	0.97	0.931	0	0	RPS7
0	0.821325	0.985	0.702	0	0	PRKCA
0	0.815029	0.786	0.402	0	0	CHI3L2
0	0.81479	0.918	0.498	0	0	MSI2
0	0.811011	0.97	0.761	0	0	NUCB2
0	0.810994	0.908	0.589	0	0	ISG15
0	0.801505	0.961	0.911	0	0	PFN1
0	0.800325	0.834	0.507	0	0	NOLC1
0	0.796229	0.858	0.456	0	0	LAT
0	0.795547	0.924	0.789	0	0	EIF5A
0	0.793223	0.94	0.577	0	0	HDAC4
0	0.787878	0.917	0.647	0	0	JPT1
0	0.78756	0.964	0.875	0	0	RPS5
0	0.784415	0.869	0.625	0	0	RANBP1
0	0.783424	0.697	0.286	0	0	ENSG00000222017
0	0.778717	0.858	0.414	0	0	IFITM1
0	0.778294	0.885	0.43	0	0	CAMK4
0	0.77679	0.726	0.344	0	0	NDST3
0	0.776436	0.915	0.683	0	0	NASP
0	0.776308	0.747	0.548	0	0	DDIT4
0	0.77278	0.832	0.385	0	0	RHOH
0	0.771576	0.803	0.466	0	0	PAICS
0	0.770439	0.903	0.703	0	0	RBM3
0	0.767905	0.934	0.791	0	0	NDUFS5
0	0.765531	0.866	0.648	0	0	PPP1R14B
0	0.759284	0.98	0.938	0	0	RPS6
0	0.756688	0.882	0.458	0	0	ZNRF1
0	0.755417	0.919	0.756	0	0	SNRPB
0	0.754433	0.8	0.419	0	0	SELL
0	0.75392	0.922	0.806	0	0	LDHB
0	0.7536	0.912	0.578	0	0	ACSF3
0	0.753468	0.9	0.519	0	0	TMEM131L
0	0.749976	0.924	0.676	0	0	TCP1
0	0.748296	0.881	0.42	0	0	CD247
0	0.747146	0.986	0.919	0	0	NCL
0	0.746217	0.89	0.472	0	0	PTPN7
0	0.74254	0.904	0.443	0	0	BCL11B
0	0.741155	0.882	0.602	0	0	RPAIN
0	0.740846	0.921	0.66	0	0	C12orf57
0	0.739301	0.854	0.438	0	0	ZNF195
0	0.738912	0.896	0.59	0	0	CCND3
0	0.738509	0.926	0.536	0	0	KLF12
0	0.736537	0.72	0.322	0	0	SIX6
0	0.735055	0.778	0.457	0	0	MCM3
0	0.734843	0.957	0.88	0	0	RPSA
0	0.731601	0.849	0.712	0	0	SH3BP5
0	0.73104	0.749	0.317	0	0	AFF2
0	0.726802	0.843	0.58	0	0	NHP2
0	0.726777	0.806	0.36	0	0	GPR174
0	0.721406	0.877	0.656	0	0	SNRPD1
0	0.717338	0.94	0.629	0	0	PHF14
0	0.716537	0.961	0.864	0	0	SET
0	0.715493	0.718	0.38	0	0	PMEPA1
0	0.715054	0.801	0.323	0	0	DBN1
0	0.714292	0.95	0.826	0	0	GSTP1
0	0.709159	0.645	0.251	0	0	SUSD4
0	0.707884	0.785	0.358	0	0	ARPP21
0	0.706163	0.695	0.294	0	0	SNTG2
0	0.705243	0.767	0.505	0	0	PCNA
0	0.704423	0.855	0.448	0	0	PAFAH1B3
0	0.703344	0.852	0.541	0	0	CASP8
0	0.701081	0.862	0.585	0	0	PRMT1
0	0.699891	0.952	0.809	0	0	DNAJA1
0	0.697276	0.92	0.76	0	0	GTF3A
0	0.694374	0.942	0.833	0	0	CHCHD2
0	0.691956	0.901	0.631	0	0	NOP58
0	0.691677	0.819	0.529	0	0	SRM
0	0.690978	0.79	0.389	0	0	SKAP1
0	0.690623	0.861	0.439	0	0	HES4
0	0.689706	0.957	0.891	0	0	RPS17
0	0.688048	0.905	0.631	0	0	SSBP2
0	0.687288	0.766	0.375	0	0	AFF3
0	0.686112	0.709	0.416	0	0	MCM6
0	0.685185	0.921	0.75	0	0	CCT6A
0	0.685122	0.924	0.733	0	0	C9orf78
0	0.684815	0.903	0.734	0	0	CCT5
0	0.681849	0.92	0.7	0	0	SMARCE1
0	0.681338	0.824	0.382	0	0	CD2
0	0.680017	0.881	0.531	0	0	SEPTIN1
0	0.679501	0.865	0.48	0	0	BICD1
0	0.677271	0.974	0.903	0	0	RACK1
0	0.673279	0.884	0.562	0	0	HDAC1
0	0.672854	0.82	0.484	0	0	CNN2
0	0.672781	0.888	0.632	0	0	NOP56
0	0.672434	0.991	0.953	0	0	RPS2
0	0.671037	0.635	0.29	0	0	GINS2
0	0.670698	0.933	0.794	0	0	PGK1
0	0.668941	0.886	0.51	0	0	CCDC88C
0	0.668764	0.766	0.426	0	0	MCM7
0	0.666708	0.93	0.811	0	0	COX6C
0	0.665845	0.91	0.724	0	0	U2AF1
0	0.663868	0.862	0.61	0	0	CCT7
0	0.662411	0.997	0.976	0	0	PTMA
0	0.659348	0.791	0.421	0	0	MYO7B
0	0.659052	0.969	0.812	0	0	PNN
0	0.65824	0.736	0.347	0	0	CD96
0	0.658134	0.985	0.876	0	0	MACF1
0	0.655777	0.912	0.661	0	0	C4orf48
0	0.654963	0.888	0.72	0	0	LDHA
0	0.654875	0.707	0.385	0	0	MCM4
0	0.654489	0.928	0.712	0	0	BBLN
0	0.653921	0.969	0.786	0	0	RUNX1
0	0.652462	0.758	0.324	0	0	SH2D1A
0	0.652022	0.929	0.645	0	0	SMARCA4
0	0.648936	0.849	0.382	0	0	ZAP70
0	0.648308	0.892	0.612	0	0	KDM1A
0	0.647169	0.967	0.903	0	0	RPL24
0	0.646709	0.779	0.424	0	0	SNHG15
0	0.644261	0.89	0.506	0	0	ACAP1
0	0.641621	0.964	0.755	0	0	MAP4K4
0	0.641242	0.965	0.879	0	0	EEF1G
0	0.640696	0.944	0.766	0	0	PRKDC
0	0.638774	0.766	0.347	0	0	MED12L
0	0.638705	0.679	0.289	0	0	UNG
0	0.638127	0.872	0.562	0	0	PRDX2
0	0.638029	0.84	0.386	0	0	PARD3
0	0.637529	0.772	0.426	0	0	TPTEP1
0	0.636157	0.969	0.898	0	0	H3-3A
0	0.636029	0.942	0.76	0	0	TLE5
0	0.635796	0.931	0.693	0	0	DIAPH1
0	0.635226	0.708	0.325	0	0	MZB1
0	0.63494	0.917	0.731	0	0	NUDC
0	0.632742	0.903	0.744	0	0	PA2G4
0	0.631342	0.924	0.791	0	0	COX7A2
0	0.629941	0.935	0.72	0	0	SMYD3
0	0.628679	0.734	0.315	0	0	BEX1
0	0.627962	0.94	0.8	0	0	SNRPD2
0	0.627932	0.988	0.948	0	0	RPS19
0	0.627897	0.782	0.45	0	0	ODC1
0	0.627831	0.667	0.286	0	0	CD226
0	0.627281	0.849	0.452	0	0	SEMA4D
0	0.625878	0.956	0.847	0	0	HNRNPD
0	0.625708	0.821	0.563	0	0	GNL3
0	0.624909	0.916	0.744	0	0	EIF3M
0	0.623718	0.916	0.789	0	0	RAN
0	0.623598	0.876	0.639	0	0	APEX1
0	0.62102	0.975	0.869	0	0	XRCC5
0	0.620736	0.766	0.323	0	0	IGFBP2
0	0.620252	0.976	0.933	0	0	RPS3A
0	0.619896	0.936	0.733	0	0	YWHAQ
0	0.619023	0.977	0.921	0	0	RPL6
0	0.618725	0.885	0.462	0	0	ZEB1
0	0.618373	0.669	0.356	0	0	MCM5
0	0.617765	0.855	0.553	0	0	RBM4
0	0.616716	0.932	0.701	0	0	NEK7
0	0.613181	0.84	0.467	0	0	IRF1-AS1
0	0.612825	0.944	0.848	0	0	HINT1
0	0.61239	0.895	0.614	0	0	IDH2
0	0.612009	0.937	0.715	0	0	LDLRAD4
0	0.611211	0.719	0.36	0	0	DANCR
0	0.610494	0.867	0.651	0	0	SIVA1
0	0.609962	0.973	0.915	0	0	RPLP0
0	0.608633	0.868	0.681	0	0	DUT
0	0.607473	0.884	0.579	0	0	PRKCH
0	0.607017	0.673	0.317	0	0	DNAH14
0	0.60663	0.896	0.723	0	0	ERH
0	0.606488	0.772	0.386	0	0	DTX1
0	0.606037	0.941	0.73	0	0	ILF3
0	0.605974	0.893	0.69	0	0	NDUFA12
0	0.605748	0.932	0.828	0	0	BTF3
0	0.605676	0.759	0.479	0	0	EBNA1BP2
0	0.604347	0.885	0.716	0	0	ABRACL
0	0.601465	0.74	0.3	0	0	DUXAP8
0	0.60058	0.977	0.929	0	0	RPS3
0	0.600478	0.844	0.625	0	0	ATP5MC1
0	0.600127	0.975	0.874	0	0	HSPA8
0	0.599874	0.947	0.787	0	0	TOP1
0	0.599849	0.988	0.94	0	0	RPS15
0	0.599597	0.903	0.734	0	0	CCT8
0	0.599532	0.677	0.299	0	0	ENSG00000176320
0	0.597261	0.915	0.749	0	0	CCT3
0	0.596565	0.952	0.717	0	0	EVL
0	0.59599	0.746	0.333	0	0	SIT1
0	0.595451	0.904	0.733	0	0	PSMA4
0	0.594826	0.942	0.779	0	0	HNRNPR
0	0.593599	0.925	0.792	0	0	UQCRH
0	0.593545	0.976	0.895	0	0	HNRNPU
0	0.593527	0.95	0.757	0	0	FAM133B
0	0.593403	0.7	0.293	0	0	GATA3
0	0.593149	0.887	0.659	0	0	PSMA5
0	0.591889	0.85	0.566	0	0	SSRP1
0	0.591876	0.936	0.794	0	0	HNRNPAB
0	0.591808	0.954	0.795	0	0	HMGN1
0	0.589198	0.8	0.424	0	0	CCDC138
0	0.588797	0.853	0.538	0	0	ZNF428
0	0.58789	0.917	0.767	0	0	CACYBP
0	0.587152	0.873	0.498	0	0	TNRC6C
0	0.585237	0.914	0.706	0	0	RNASEH2B
0	0.584347	0.885	0.608	0	0	GPHN
0	0.583708	0.839	0.576	0	0	CHORDC1
0	0.5828	0.968	0.831	0	0	FNBP1
0	0.582728	0.885	0.609	0	0	GALNT2
0	0.581975	0.835	0.564	0	0	FBL
0	0.581098	0.917	0.772	0	0	PSME1
0	0.579869	0.613	0.261	0	0	CTSW
0	0.579723	0.974	0.84	0	0	TCF12
0	0.578529	0.643	0.284	0	0	ITM2C
0	0.578469	0.965	0.915	0	0	RPL5
0	0.577833	0.774	0.435	0	0	HELLS
0	0.576261	0.826	0.63	0	0	IFITM2
0	0.575897	0.72	0.331	0	0	CDCA7
0	0.574668	0.759	0.424	0	0	RIPOR2
0	0.57433	0.81	0.436	0	0	NETO2
0	0.573736	0.941	0.833	0	0	ENO1
0	0.573422	0.795	0.384	0	0	CYFIP2
0	0.573269	0.981	0.924	0	0	RPL18A
0	0.572527	0.709	0.355	0	0	FAM117B
0	0.572269	0.953	0.886	0	0	NPM1
0	0.571797	0.963	0.848	0	0	HNRNPA3
0	0.571481	0.838	0.617	0	0	PHB1
0	0.57135	0.827	0.538	0	0	FAM136A
0	0.570275	0.761	0.369	0	0	PIK3R3
0	0.570057	0.688	0.295	0	0	GRAP2
0	0.570014	0.923	0.808	0	0	SNHG29
0	0.569428	0.907	0.695	0	0	PSMB7
0	0.569308	0.916	0.741	0	0	CCT4
0	0.569299	0.5	0.216	0	0	CD40LG
0	0.569089	0.962	0.885	0	0	RPL10A
0	0.568218	0.99	0.942	0	0	RPS18
0	0.568082	0.918	0.745	0	0	SUPT16H
0	0.567489	0.89	0.603	0	0	ESYT2
0	0.564859	0.628	0.34	0	0	DTL
0	0.564816	0.938	0.797	0	0	CBX3
0	0.564799	0.757	0.382	0	0	BACH2
0	0.564569	0.904	0.734	0	0	PRDX5
0	0.56455	0.884	0.684	0	0	HDAC2
0	0.564508	0.901	0.71	0	0	PSMB8
0	0.563417	0.913	0.741	0	0	SRSF3
0	0.56271	0.893	0.682	0	0	PSME2
0	0.560135	0.72	0.41	0	0	GPATCH4
0	0.559734	0.678	0.307	0	0	CENPV
0	0.558459	0.87	0.664	0	0	PSMA3
0	0.557388	0.933	0.705	0	0	RBBP4
0	0.556865	0.874	0.597	0	0	ZNF326
0	0.555971	0.947	0.812	0	0	MATR3
0	0.555369	0.847	0.5	0	0	GMDS
0	0.554674	0.67	0.301	0	0	HHIP
0	0.554574	0.939	0.758	0	0	ZRANB2
0	0.554302	0.601	0.29	0	0	TRAC
0	0.554165	0.735	0.347	0	0	GXYLT2
0	0.553957	0.912	0.725	0	0	PPM1G
0	0.5534	0.844	0.544	0	0	ATP2B4
0	0.55324	0.83	0.505	0	0	PELI2
0	0.552813	0.656	0.31	0	0	PCBP3
0	0.551551	0.983	0.92	0	0	RPL35
0	0.549678	0.812	0.387	0	0	C12orf75
0	0.547841	0.803	0.379	0	0	MYH10
0	0.547831	0.832	0.538	0	0	IP6K2
0	0.545616	0.861	0.634	0	0	CLNS1A
0	0.544059	0.759	0.508	0	0	TXLNGY
0	0.543806	0.855	0.635	0	0	LSM7
0	0.542778	0.935	0.808	0	0	PSMA6
0	0.542715	0.866	0.659	0	0	EIF3I
0	0.541453	0.793	0.464	0	0	SINHCAF
0	0.541318	0.932	0.77	0	0	HNRNPM
0	0.541008	0.916	0.766	0	0	ATP5F1B
0	0.540437	0.659	0.288	0	0	ENSG00000287784
0	0.538642	0.7	0.299	0	0	TESPA1
0	0.537977	0.886	0.64	0	0	UBTF
0	0.536888	0.782	0.435	0	0	ATF7IP2
0	0.536144	0.723	0.419	0	0	PUDP
0	0.535022	0.993	0.955	0	0	HNRNPA2B1
0	0.534917	0.854	0.62	0	0	HTATSF1
0	0.534761	0.858	0.579	0	0	SRPK1
0	0.53439	0.922	0.728	0	0	BAZ1B
0	0.534281	0.887	0.701	0	0	SNU13
0	0.533907	0.722	0.338	0	0	TSPAN5
0	0.533219	0.802	0.392	0	0	HDGFL3
0	0.530807	0.884	0.692	0	0	BANF1
0	0.52974	0.814	0.549	0	0	LIMD2
0	0.529196	0.975	0.919	0	0	RPL7A
0	0.529164	0.522	0.22	0	0	DPF3
0	0.528753	0.757	0.369	0	0	KIF3A
0	0.527342	0.84	0.594	0	0	ALYREF
0	0.526908	0.751	0.352	0	0	BCL7A
0	0.526856	0.753	0.456	0	0	TYMS
0	0.526193	0.872	0.672	0	0	GADD45GIP1
0	0.525103	0.818	0.534	0	0	HIBCH
0	0.525081	0.918	0.741	0	0	NONO
0	0.523154	0.979	0.91	0	0	RPL29
0	0.522817	0.813	0.488	0	0	ZNF22
0	0.52263	0.953	0.839	0	0	SERBP1
0	0.522392	0.798	0.6	0	0	RPL22L1
0	0.520773	0.897	0.656	0	0	TOP2B
0	0.520442	0.792	0.519	0	0	MRPL11
0	0.519791	0.96	0.851	0	0	FUS
0	0.518955	0.831	0.624	0	0	PDCD5
0	0.518504	0.763	0.508	0	0	SNRPA1
0	0.518255	0.864	0.674	0	0	MRPL20
0	0.517605	0.807	0.536	0	0	MRPL3
0	0.517482	0.956	0.876	0	0	EEF1B2
0	0.517158	0.936	0.796	0	0	PABPN1
0	0.516956	0.566	0.244	0	0	SAMD12
0	0.516706	0.729	0.336	0	0	PRKCQ
0	0.51655	0.785	0.525	0	0	GTPBP4
0	0.516366	0.763	0.518	0	0	KDM5B
0	0.515935	0.962	0.827	0	0	PSMA1
0	0.51491	0.91	0.727	0	0	TERF2IP
0	0.514902	0.859	0.671	0	0	NDUFAB1
0	0.514726	0.873	0.667	0	0	SRSF2
0	0.51322	0.962	0.904	0	0	RPL9
0	0.512537	0.692	0.34	0	0	GIHCG
0	0.512423	0.95	0.807	0	0	PRPF40A
0	0.511495	0.875	0.662	0	0	PSMB2
0	0.510469	0.98	0.93	0	0	ACTG1
0	0.510428	0.72	0.346	0	0	KLHL23
0	0.51017	0.893	0.709	0	0	SNRPD3
0	0.509599	0.87	0.646	0	0	ILF2
0	0.509389	0.87	0.667	0	0	SNRPB2
0	0.507743	0.962	0.906	0	0	RPS4X
0	0.507378	0.634	0.292	0	0	LINC01934
0	0.506244	0.859	0.611	0	0	ZC3HAV1
0	0.504884	0.96	0.852	0	0	EIF4G2
0	0.50484	0.907	0.685	0	0	ELOVL5
0	0.504829	0.891	0.697	0	0	DRAP1
0	0.504157	0.88	0.711	0	0	SSBP1
0	0.503597	0.367	0.128	0	0	KRT1
0	0.503287	0.784	0.464	0	0	TRAF3IP3
0	0.503266	0.881	0.676	0	0	MAZ
0	0.502927	0.777	0.468	0	0	CMSS1
0	0.502911	0.955	0.892	0	0	RPL7
0	0.502177	0.748	0.39	0	0	RPIA
0	0.502046	0.749	0.498	0	0	DKC1
0	0.501319	0.889	0.708	0	0	SRSF9
0	0.500769	0.673	0.36	0	0	DCTPP1
0	0.500498	0.75	0.368	0	0	KIAA1958
0	0.500283	0.782	0.594	0	0	ADD3
0	0.500174	0.959	0.82	0	0	BPTF
0	0.500069	0.668	0.298	0	0	AEBP1
1.18e-286	0.509518	0.582	0.412	3.14e-282	0	BAG3
4.95e-277	0.555452	0.681	0.534	1.31e-272	0	SLFN5
1.94e-202	0.558881	0.761	0.635	5.13e-198	0	TRG-AS1
2.46e-153	0.855399	0.579	0.49	6.52e-149	0	HSPA1B
1.1e-98	0.865228	0.365	0.281	2.91e-94	0	HSPA6

## Sheet: cluster 1
p_val	avg_log2FC	pct.1	pct.2	p_val_adj	cluster	gene
0	2.90645	0.999	0.701	0	1	LYZ
0	2.71946	0.962	0.748	0	1	CHI3L1
0	2.47703	0.951	0.709	0	1	SPP1
0	2.42254	0.968	0.417	0	1	FBP1
0	2.2819	0.999	0.894	0	1	APOE
0	2.20714	1	0.725	0	1	S100A11
0	2.06994	0.977	0.803	0	1	CD52
0	2.02867	1	0.999	0	1	FTH1
0	1.97175	0.997	0.533	0	1	FCER1G
0	1.942	1	0.651	0	1	TYROBP
0	1.86983	1	0.999	0	1	FTL
0	1.8635	0.999	0.91	0	1	CSTB
0	1.86332	1	0.969	0	1	VIM
0	1.84671	0.934	0.265	0	1	SPARC
0	1.84669	0.995	0.539	0	1	CD9
0	1.83874	1	0.844	0	1	CTSB
0	1.80045	0.998	0.79	0	1	ITGB2
0	1.78959	0.99	0.691	0	1	APOC1
0	1.72967	1	0.703	0	1	S100A6
0	1.7173	0.974	0.78	0	1	FABP5
0	1.71313	0.998	0.568	0	1	CD68
0	1.68036	0.998	0.756	0	1	ANXA2
0	1.66564	0.985	0.722	0	1	HCST
0	1.62415	0.947	0.249	0	1	TREM2
0	1.61378	0.999	0.793	0	1	S100A4
0	1.60929	0.988	0.498	0	1	IGSF6
0	1.5949	0.995	0.532	0	1	CYBB
0	1.58435	1	0.854	0	1	CD63
0	1.57964	0.998	0.914	0	1	SH3BGRL3
0	1.57779	0.968	0.342	0	1	MNDA
0	1.57498	0.847	0.174	0	1	S100A9
0	1.57032	0.947	0.587	0	1	MMP9
0	1.54988	0.997	0.748	0	1	APLP2
0	1.53146	0.998	0.806	0	1	GPX1
0	1.51886	0.998	0.684	0	1	PLD3
0	1.50218	0.988	0.503	0	1	MSR1
0	1.50145	0.993	0.476	0	1	TSPO
0	1.48506	0.953	0.333	0	1	CD14
0	1.44329	0.956	0.66	0	1	FDX1
0	1.43581	0.992	0.521	0	1	PLEK
0	1.38975	1	0.934	0	1	CTSD
0	1.37686	0.934	0.257	0	1	ENSG00000257764
0	1.37454	0.998	0.797	0	1	CAPG
0	1.36996	0.973	0.527	0	1	LSP1
0	1.36983	0.89	0.381	0	1	BCL2A1
0	1.36604	0.995	0.709	0	1	LIPA
0	1.35632	0.999	0.883	0	1	HLA-A
0	1.35014	0.996	0.819	0	1	ARPC1B
0	1.34368	0.986	0.397	0	1	NCF2
0	1.34278	0.998	0.679	0	1	NPC2
0	1.33106	0.969	0.433	0	1	GSN
0	1.32947	0.977	0.353	0	1	MS4A7
0	1.32162	0.972	0.412	0	1	CTSL
0	1.3206	0.993	0.762	0	1	S100A10
0	1.31377	1	0.902	0	1	HLA-B
0	1.30524	0.998	0.529	0	1	CTSZ
0	1.30408	0.998	0.697	0	1	LGALS1
0	1.29677	0.98	0.55	0	1	SRGN
0	1.29356	0.996	0.733	0	1	BRI3
0	1.29079	1	0.767	0	1	CTSS
0	1.28073	0.994	0.625	0	1	ANXA5
0	1.27756	0.957	0.29	0	1	RAB13
0	1.26827	0.758	0.207	0	1	TGFBI
0	1.25959	0.983	0.387	0	1	C5AR1
0	1.25054	0.993	0.465	0	1	CTSH
0	1.24901	0.999	0.704	0	1	GRN
0	1.24588	0.988	0.493	0	1	CD36
0	1.23499	1	0.746	0	1	IFI30
0	1.21562	0.978	0.415	0	1	VAMP8
0	1.21036	0.999	0.66	0	1	CST3
0	1.20704	0.973	0.466	0	1	CYP27A1
0	1.20653	0.813	0.472	0	1	RGCC
0	1.20517	0.975	0.581	0	1	PLAUR
0	1.20292	0.995	0.809	0	1	LAPTM5
0	1.19766	0.964	0.408	0	1	TXNIP
0	1.19637	0.958	0.325	0	1	A2M
0	1.19396	0.981	0.386	0	1	SPI1
0	1.19385	0.978	0.706	0	1	NFKBIA
0	1.18978	0.921	0.28	0	1	LPL
0	1.18276	0.985	0.441	0	1	PLIN2
0	1.17883	0.98	0.599	0	1	ATP6AP2
0	1.16963	1	0.992	0	1	TMSB4X
0	1.16031	0.992	0.834	0	1	DBI
0	1.16025	1	0.985	0	1	B2M
0	1.15674	0.992	0.579	0	1	ACP5
0	1.14454	0.997	0.832	0	1	RNASEK
0	1.1417	0.986	0.407	0	1	SAMHD1
0	1.11891	0.984	0.625	0	1	CEBPB
0	1.11856	0.702	0.147	0	1	IL1RN
0	1.11619	0.995	0.785	0	1	ATP6V0C
0	1.10135	0.978	0.383	0	1	CCPG1
0	1.09184	0.979	0.777	0	1	CALM3
0	1.07879	0.991	0.479	0	1	CD44
0	1.07551	0.975	0.704	0	1	BCAP31
0	1.06952	0.971	0.535	0	1	IFNGR1
0	1.06871	0.997	0.839	0	1	CYBA
0	1.06177	0.913	0.273	0	1	MS4A4A
0	1.05697	0.984	0.627	0	1	ALCAM
0	1.04936	0.917	0.295	0	1	CD163
0	1.0491	0.977	0.688	0	1	MGST3
0	1.04794	0.866	0.273	0	1	GCHFR
0	1.04382	0.926	0.278	0	1	IL18
0	1.04224	0.963	0.498	0	1	ZYX
0	1.03994	0.99	0.754	0	1	ATP6V0B
0	1.03896	0.997	0.634	0	1	ASAH1
0	1.03698	0.969	0.424	0	1	EVI2B
0	1.03068	0.999	0.722	0	1	SAT1
0	1.02259	0.908	0.239	0	1	GGTA1
0	1.02136	0.99	0.464	0	1	CD37
0	1.02106	0.991	0.637	0	1	TIMP2
0	1.0182	0.992	0.579	0	1	AHNAK
0	1.01416	0.975	0.621	0	1	TMEM14C
0	1.00858	0.983	0.432	0	1	LRP1
0	1.00781	0.957	0.32	0	1	SERPINB1
0	1.0022	0.976	0.502	0	1	BLVRB
0	1.002	0.996	0.654	0	1	CAST
0	0.998177	0.997	0.753	0	1	HLA-E
0	0.996972	0.99	0.739	0	1	ATP6V1F
0	0.99362	0.932	0.273	0	1	PYCARD
0	0.983772	0.958	0.377	0	1	TYMP
0	0.977683	0.959	0.376	0	1	GLIPR1
0	0.974483	0.992	0.49	0	1	LITAF
0	0.973767	0.904	0.212	0	1	SLAMF8
0	0.972918	0.928	0.357	0	1	EVI2A
0	0.970773	0.963	0.444	0	1	PILRA
0	0.970563	0.999	0.763	0	1	LGALS3
0	0.970502	0.971	0.595	0	1	LTA4H
0	0.970367	0.931	0.299	0	1	RNASE6
0	0.966659	0.927	0.395	0	1	LST1
0	0.960318	0.719	0.106	0	1	LINC02244
0	0.958477	0.972	0.348	0	1	RAB31
0	0.954428	0.858	0.192	0	1	SDC2
0	0.950236	0.914	0.299	0	1	PELATON
0	0.945213	0.986	0.63	0	1	LAMP1
0	0.941981	0.99	0.793	0	1	GM2A
0	0.939991	0.975	0.445	0	1	MARCKS
0	0.939714	0.937	0.276	0	1	NRP1
0	0.935516	0.895	0.503	0	1	CCL3
0	0.934516	0.969	0.631	0	1	CYSTM1
0	0.932785	1	0.932	0	1	SERF2
0	0.932055	0.906	0.257	0	1	ALDH2
0	0.930063	0.997	0.817	0	1	SH3BGRL
0	0.928708	0.922	0.296	0	1	EPB41L3
0	0.926267	0.989	0.767	0	1	AP2S1
0	0.923661	0.943	0.304	0	1	CSTA
0	0.922899	0.978	0.502	0	1	RNASET2
0	0.920795	0.916	0.257	0	1	CXCL16
0	0.920015	0.983	0.49	0	1	EMILIN2
0	0.913989	0.996	0.796	0	1	GABARAP
0	0.913623	0.998	0.873	0	1	OAZ1
0	0.912534	0.995	0.811	0	1	TMBIM6
0	0.90683	0.977	0.425	0	1	PLA2G7
0	0.898029	0.738	0.146	0	1	MGST1
0	0.897178	0.978	0.416	0	1	DAB2
0	0.896418	0.965	0.34	0	1	LY86
0	0.895361	0.951	0.444	0	1	SCPEP1
0	0.892018	0.936	0.282	0	1	HNMT
0	0.89166	0.774	0.111	0	1	LGALS2
0	0.891154	0.846	0.219	0	1	BHLHE41
0	0.885918	0.987	0.636	0	1	FCGRT
0	0.88394	0.983	0.572	0	1	HEXB
0	0.881212	0.984	0.444	0	1	TNFAIP2
0	0.880471	0.976	0.639	0	1	RNH1
0	0.880346	0.994	0.676	0	1	SDCBP
0	0.879054	0.973	0.357	0	1	ARHGAP18
0	0.878201	0.967	0.427	0	1	KYNU
0	0.878007	0.844	0.183	0	1	AQP9
0	0.875208	0.961	0.571	0	1	PTMS
0	0.867716	0.974	0.574	0	1	NAGK
0	0.866368	0.995	0.514	0	1	ZEB2
0	0.865896	0.973	0.484	0	1	CREG1
0	0.860647	0.646	0.124	0	1	VSIG4
0	0.859918	0.73	0.421	0	1	CHIT1
0	0.859507	0.996	0.82	0	1	CALM2
0	0.848672	0.956	0.435	0	1	EMP1
0	0.846937	0.961	0.386	0	1	CPM
0	0.841384	0.981	0.694	0	1	SOD2
0	0.841158	0.986	0.742	0	1	ATP6V0E1
0	0.841009	0.961	0.543	0	1	PDXK
0	0.839669	0.985	0.754	0	1	CD81
0	0.838557	0.314	0.118	0	1	FABP4
0	0.838376	0.99	0.772	0	1	GSTO1
0	0.83233	0.859	0.213	0	1	ME1
0	0.826107	0.999	0.774	0	1	GPNMB
0	0.823736	0.457	0.108	0	1	CRABP2
0	0.822285	0.965	0.654	0	1	UCP2
0	0.819091	0.995	0.843	0	1	HLA-C
0	0.817865	0.957	0.512	0	1	ATP6AP1
0	0.817608	0.604	0.255	0	1	CXCL3
0	0.817171	0.959	0.44	0	1	CTSA
0	0.816055	0.881	0.223	0	1	PLBD1
0	0.815582	0.994	0.547	0	1	ITGAX
0	0.813169	1	0.936	0	1	PSAP
0	0.810993	0.978	0.399	0	1	NPL
0	0.810986	0.962	0.611	0	1	CD84
0	0.808693	0.993	0.713	0	1	FXYD5
0	0.808031	0.428	0.168	0	1	IL1B
0	0.806364	0.872	0.244	0	1	HMOX1
0	0.804873	0.951	0.38	0	1	MAFB
0	0.803964	0.985	0.633	0	1	LAMP2
0	0.800617	0.964	0.603	0	1	EFHD2
0	0.800298	0.981	0.738	0	1	HM13
0	0.799358	0.968	0.592	0	1	VEGFB
0	0.797408	0.98	0.733	0	1	NOP10
0	0.792605	0.851	0.212	0	1	FCGR1A
0	0.79178	0.946	0.299	0	1	RAB32
0	0.787809	0.998	0.849	0	1	ITM2B
0	0.787782	0.949	0.311	0	1	OGFRL1
0	0.78679	0.991	0.739	0	1	NFE2L2
0	0.786679	0.955	0.532	0	1	REEP5
0	0.786043	0.957	0.351	0	1	TNFRSF1B
0	0.779179	0.761	0.382	0	1	RNASE1
0	0.775394	1	0.999	0	1	MT-CO1
0	0.773418	0.968	0.469	0	1	MFSD1
0	0.772936	0.95	0.734	0	1	RAC2
0	0.770907	0.934	0.445	0	1	LPCAT2
0	0.770789	0.966	0.472	0	1	MAN2B1
0	0.770639	0.98	0.494	0	1	SGK1
0	0.767174	0.919	0.28	0	1	OSCAR
0	0.763051	0.951	0.566	0	1	CD59
0	0.762391	0.971	0.389	0	1	LYN
0	0.762152	0.968	0.447	0	1	LY96
0	0.756924	0.971	0.394	0	1	HLA-DMA
0	0.755583	0.987	0.812	0	1	CALR
0	0.753423	0.985	0.43	0	1	FCHO2
0	0.750383	0.767	0.146	0	1	MEIKIN
0	0.750262	0.937	0.355	0	1	ASPH
0	0.747063	0.956	0.648	0	1	PLEKHO1
0	0.744842	0.812	0.432	0	1	JAKMIP2
0	0.741007	0.974	0.747	0	1	BTG1
0	0.740346	0.691	0.149	0	1	CYP1B1
0	0.739971	0.911	0.517	0	1	PRXL2A
0	0.739941	0.959	0.311	0	1	SLC8A1
0	0.739905	0.89	0.24	0	1	H2AJ
0	0.739676	0.938	0.473	0	1	SYNGR2
0	0.737476	0.947	0.54	0	1	PPT1
0	0.737033	0.963	0.363	0	1	SIRPA
0	0.736787	0.879	0.274	0	1	TNFSF13B
0	0.733099	0.757	0.234	0	1	C1orf54
0	0.726906	0.954	0.561	0	1	LAPTM4A
0	0.726538	0.995	0.831	0	1	ARPC3
0	0.723852	0.932	0.366	0	1	MYO1E
0	0.72372	0.923	0.292	0	1	METRNL
0	0.722675	0.956	0.352	0	1	HCK
0	0.721638	0.94	0.441	0	1	TSPAN4
0	0.719677	0.989	0.754	0	1	PNRC1
0	0.717797	0.983	0.766	0	1	CAP1
0	0.715135	0.982	0.741	0	1	ARL6IP5
0	0.714954	0.924	0.545	0	1	ID2
0	0.712524	0.966	0.675	0	1	FERMT3
0	0.71243	0.968	0.463	0	1	ADA2
0	0.712197	0.995	0.855	0	1	CCDC88A
0	0.711332	0.807	0.196	0	1	PTAFR
0	0.709363	0.974	0.551	0	1	CPVL
0	0.707795	0.965	0.36	0	1	HLA-DMB
0	0.706441	0.879	0.29	0	1	AGTRAP
0	0.706136	0.888	0.234	0	1	ENG
0	0.705703	0.959	0.568	0	1	MPP1
0	0.70525	0.956	0.436	0	1	SCARB2
0	0.704272	0.706	0.109	0	1	CDA
0	0.704152	0.867	0.258	0	1	CLEC7A
0	0.702243	0.466	0.097	0	1	PTX3
0	0.700448	0.956	0.352	0	1	TFEC
0	0.698931	0.93	0.315	0	1	LILRB4
0	0.697308	0.94	0.366	0	1	DRAM1
0	0.69409	0.891	0.328	0	1	LMNA
0	0.693796	0.826	0.173	0	1	CXXC5
0	0.692887	0.913	0.624	0	1	LY6E
0	0.69274	0.967	0.447	0	1	MYO1F
0	0.690599	0.965	0.509	0	1	GNS
0	0.689704	0.942	0.523	0	1	ATP6V0D1
0	0.688838	0.885	0.42	0	1	ACAA2
0	0.687252	0.793	0.481	0	1	CCL4
0	0.687169	0.886	0.334	0	1	CD4
0	0.684707	0.96	0.518	0	1	MGAT1
0	0.684587	0.835	0.349	0	1	ICAM1
0	0.682466	0.925	0.347	0	1	SLC1A3
0	0.682238	0.943	0.516	0	1	KIAA0930
0	0.680187	0.996	0.859	0	1	ARPC5
0	0.679347	0.957	0.364	0	1	SKAP2
0	0.677833	0.911	0.315	0	1	BASP1
0	0.671594	0.841	0.427	0	1	MFSD12
0	0.671307	0.994	0.769	0	1	SQSTM1
0	0.670166	0.873	0.322	0	1	FGR
0	0.668591	0.891	0.258	0	1	CD302
0	0.666769	0.847	0.232	0	1	PBDC1
0	0.666179	0.897	0.261	0	1	CD86
0	0.664165	0.851	0.351	0	1	SELENOP
0	0.664142	0.991	0.779	0	1	RAC1
0	0.664072	0.968	0.628	0	1	TMBIM4
0	0.65957	0.836	0.267	0	1	CEBPD
0	0.658349	0.969	0.702	0	1	ANXA11
0	0.657862	0.855	0.229	0	1	C1orf162
0	0.65784	0.765	0.137	0	1	ECM1
0	0.657681	0.931	0.364	0	1	TBXAS1
0	0.656586	0.844	0.333	0	1	CYP51A1
0	0.655892	0.852	0.196	0	1	ANPEP
0	0.653218	0.925	0.417	0	1	AOAH
0	0.652714	0.961	0.474	0	1	CYFIP1
0	0.65263	0.917	0.449	0	1	DNASE2
0	0.652246	0.444	0.185	0	1	C1QA
0	0.65167	0.995	0.821	0	1	GPX4
0	0.649397	0.887	0.436	0	1	GLA
0	0.648677	0.842	0.262	0	1	RRAS
0	0.647536	0.982	0.764	0	1	LIMS1
0	0.647481	0.982	0.704	0	1	M6PR
0	0.646903	0.851	0.439	0	1	SAMSN1
0	0.645338	0.99	0.827	0	1	TLN1
0	0.644988	0.956	0.657	0	1	MYDGF
0	0.643989	0.845	0.249	0	1	ADAP2
0	0.642778	0.997	0.846	0	1	RNF130
0	0.642526	0.985	0.662	0	1	RNF13
0	0.64128	0.925	0.471	0	1	SQOR
0	0.639742	0.928	0.461	0	1	HLA-F
0	0.639215	0.99	0.809	0	1	PRDX1
0	0.63813	0.959	0.651	0	1	COMT
0	0.637649	0.958	0.476	0	1	SHTN1
0	0.636208	0.966	0.672	0	1	RPS27L
0	0.635665	0.76	0.134	0	1	C19orf38
0	0.635512	0.668	0.158	0	1	CA2
0	0.634748	0.734	0.097	0	1	CLEC12A
0	0.630482	0.951	0.561	0	1	CHCHD10
0	0.629862	0.81	0.28	0	1	CITED2
0	0.629534	0.83	0.196	0	1	CBR1
0	0.629356	0.981	0.719	0	1	HIF1A
0	0.627661	0.762	0.168	0	1	DHRS9
0	0.62499	0.778	0.179	0	1	SLC11A1
0	0.624036	0.864	0.304	0	1	CD151
0	0.623644	0.962	0.678	0	1	VAT1
0	0.623372	0.982	0.646	0	1	DMXL2
0	0.622541	0.974	0.432	0	1	RBM47
0	0.621411	0.931	0.633	0	1	IER3
0	0.621066	0.975	0.41	0	1	MITF
0	0.618611	0.927	0.371	0	1	ABCA1
0	0.61709	0.965	0.623	0	1	JUNB
0	0.616942	0.893	0.338	0	1	GAA
0	0.616905	0.786	0.246	0	1	SASH1
0	0.615601	0.914	0.317	0	1	SLC15A3
0	0.614357	0.995	0.525	0	1	PLXDC2
0	0.612946	0.915	0.5	0	1	ATP1B1
0	0.612461	0.857	0.258	0	1	C3AR1
0	0.611238	0.796	0.235	0	1	JAML
0	0.610586	0.973	0.566	0	1	KLF6
0	0.608945	0.973	0.712	0	1	SH3GLB1
0	0.607854	0.856	0.305	0	1	FPR3
0	0.605522	0.812	0.37	0	1	PEA15
0	0.603047	0.84	0.298	0	1	PCK2
0	0.601171	0.426	0.078	0	1	EREG
0	0.59975	0.834	0.221	0	1	ITGB5
0	0.59927	0.973	0.49	0	1	HLA-DRB1
0	0.598328	0.549	0.106	0	1	MATK
0	0.597487	0.917	0.549	0	1	PTPRE
0	0.597345	0.711	0.243	0	1	MRC1
0	0.596479	0.854	0.225	0	1	SLC7A7
0	0.596093	0.928	0.518	0	1	NUCB1
0	0.595885	0.907	0.424	0	1	LEPROT
0	0.594754	0.95	0.559	0	1	FKBP15
0	0.594611	0.644	0.182	0	1	C15orf48
0	0.593387	0.933	0.455	0	1	ACSL1
0	0.593011	0.785	0.2	0	1	CSF1R
0	0.592428	0.841	0.248	0	1	MARCHF1
0	0.591997	0.945	0.629	0	1	TMED9
0	0.591042	0.955	0.551	0	1	ATP6V1B2
0	0.59067	0.826	0.214	0	1	IL13RA1
0	0.590144	0.873	0.377	0	1	POLD4
0	0.589505	0.765	0.25	0	1	GPAT3
0	0.589091	0.921	0.38	0	1	PLXND1
0	0.588904	0.889	0.324	0	1	HEBP1
0	0.588672	0.871	0.258	0	1	CCR1
0	0.587995	0.935	0.639	0	1	GLRX
0	0.586688	0.76	0.165	0	1	DCSTAMP
0	0.585316	0.965	0.697	0	1	P4HB
0	0.58431	0.949	0.543	0	1	IFNGR2
0	0.580991	0.817	0.206	0	1	MRAS
0	0.579836	0.855	0.363	0	1	FUOM
0	0.579298	0.978	0.63	0	1	LRPAP1
0	0.576547	0.963	0.6	0	1	SNX2
0	0.576262	0.99	0.798	0	1	GNAI2
0	0.575368	0.98	0.628	0	1	SYK
0	0.574389	0.676	0.271	0	1	CXCL2
0	0.573158	0.839	0.327	0	1	IGFLR1
0	0.572894	0.854	0.27	0	1	TCIRG1
0	0.572633	0.927	0.45	0	1	NINJ1
0	0.571102	0.954	0.437	0	1	PIK3AP1
0	0.571089	0.925	0.493	0	1	NCEH1
0	0.570189	0.929	0.5	0	1	GNG10
0	0.569746	0.925	0.62	0	1	GLIPR2
0	0.569508	0.845	0.45	0	1	IFI6
0	0.568711	0.971	0.729	0	1	TALDO1
0	0.568442	0.84	0.222	0	1	PYGL
0	0.567928	0.965	0.579	0	1	AP1S2
0	0.567838	0.993	0.831	0	1	IQGAP1
0	0.567661	0.917	0.503	0	1	VASP
0	0.566674	0.788	0.19	0	1	ZNF385A
0	0.565959	0.968	0.665	0	1	GLUL
0	0.564896	0.956	0.489	0	1	RHOQ
0	0.56428	0.986	0.829	0	1	COX5B
0	0.563421	0.858	0.299	0	1	MAF
0	0.563299	0.956	0.638	0	1	NENF
0	0.563069	0.922	0.49	0	1	DRAM2
0	0.560863	0.881	0.29	0	1	GNB4
0	0.559984	0.783	0.141	0	1	ABCC3
0	0.557921	0.986	0.783	0	1	TKT
0	0.556636	0.9	0.282	0	1	SERPINB6
0	0.556575	0.859	0.261	0	1	ATP8B4
0	0.555565	0.856	0.434	0	1	HCFC1R1
0	0.55546	0.962	0.683	0	1	ARPC4
0	0.554783	0.942	0.562	0	1	LACTB
0	0.55417	0.856	0.306	0	1	PRAM1
0	0.552233	0.774	0.258	0	1	CARD16
0	0.550371	0.972	0.718	0	1	TGOLN2
0	0.549439	0.991	0.816	0	1	UQCRB
0	0.548903	0.971	0.766	0	1	NDUFB9
0	0.548576	0.835	0.319	0	1	SLC16A3
0	0.548455	0.867	0.282	0	1	APP
0	0.547669	0.872	0.319	0	1	IL10RA
0	0.547383	0.96	0.69	0	1	BLOC1S1
0	0.543593	0.956	0.46	0	1	PTPN12
0	0.543026	0.993	0.83	0	1	RHOA
0	0.542863	0.905	0.476	0	1	EIF4EBP1
0	0.542259	0.897	0.328	0	1	FGD4
0	0.539854	0.925	0.304	0	1	CPQ
0	0.539712	0.955	0.512	0	1	DOCK4
0	0.538947	0.96	0.667	0	1	LAMTOR1
0	0.538885	0.925	0.545	0	1	USF2
0	0.538004	0.947	0.589	0	1	HADHB
0	0.537509	0.983	0.434	0	1	LRMDA
0	0.537458	0.969	0.701	0	1	ANXA1
0	0.535218	0.975	0.741	0	1	SNX6
0	0.535143	0.79	0.176	0	1	PTGR1
0	0.535132	0.902	0.463	0	1	CORO1B
0	0.533359	0.885	0.331	0	1	HAVCR2
0	0.533119	0.899	0.329	0	1	GSAP
0	0.532938	0.875	0.58	0	1	SNX10
0	0.532468	0.882	0.331	0	1	NIBAN1
0	0.532205	0.8	0.186	0	1	THEMIS2
0	0.532067	0.932	0.43	0	1	TPP1
0	0.529442	0.663	0.136	0	1	HSD3B7
0	0.527418	0.931	0.544	0	1	NTAN1
0	0.525642	0.926	0.338	0	1	MDFIC
0	0.524624	0.783	0.237	0	1	PMFBP1
0	0.522483	0.802	0.209	0	1	TNFSF12
0	0.521573	0.938	0.646	0	1	ATP6V1D
0	0.520772	0.972	0.707	0	1	CD164
0	0.519791	0.795	0.349	0	1	SRD5A3
0	0.519564	0.97	0.734	0	1	AIF1
0	0.518504	0.873	0.566	0	1	TM4SF19
0	0.518392	0.822	0.232	0	1	ITGAM
0	0.518034	0.763	0.192	0	1	SLC31A2
0	0.517559	0.571	0.072	0	1	HTRA1
0	0.517503	0.913	0.434	0	1	PTPRJ
0	0.514198	0.909	0.38	0	1	FUCA1
0	0.513953	0.803	0.227	0	1	FCGR2A
0	0.512253	0.956	0.669	0	1	TMEM59
0	0.511511	0.945	0.628	0	1	ATOX1
0	0.511196	0.994	0.862	0	1	RTN4
0	0.510194	0.938	0.381	0	1	TNS3
0	0.509372	0.992	0.766	0	1	QKI
0	0.508267	0.883	0.333	0	1	PPARG
0	0.507739	0.676	0.226	0	1	PRDM1
0	0.507678	0.91	0.352	0	1	TRPS1
0	0.507464	0.922	0.516	0	1	SCAMP2
0	0.506943	0.965	0.697	0	1	ERP29
0	0.506852	0.974	0.746	0	1	HADHA
0	0.506831	0.945	0.691	0	1	MDH1
0	0.505353	0.942	0.592	0	1	OS9
0	0.505151	0.956	0.653	0	1	AKR1A1
0	0.504577	0.897	0.402	0	1	FEZ2
0	0.503694	0.968	0.39	0	1	HLA-DPA1
0	0.503344	0.938	0.621	0	1	TMEM219
0	0.50198	0.952	0.611	0	1	ARRB2
0	0.501686	0.919	0.492	0	1	PIK3R5
0	0.500431	0.802	0.206	0	1	DUSP23
0	0.500418	0.761	0.19	0	1	GALM
0	0.500206	0.898	0.395	0	1	GRINA
0	0.500038	0.95	0.523	0	1	RAP2B
6.19e-153	0.629945	0.536	0.401	1.64e-148	1	SPON2

## Sheet: cluster 2
p_val	avg_log2FC	pct.1	pct.2	p_val_adj	cluster	gene
0	2.27045	0.954	0.601	0	2	H4C3
0	2.15028	0.994	0.658	0	2	HMGB2
0	1.9902	0.929	0.361	0	2	H1-5
0	1.9557	0.98	0.351	0	2	TOP2A
0	1.83064	0.987	0.412	0	2	CENPF
0	1.76664	0.993	0.859	0	2	TUBA1B
0	1.72869	0.993	0.834	0	2	TUBB
0	1.69781	0.996	0.445	0	2	MKI67
0	1.57921	0.965	0.433	0	2	TYMS
0	1.56256	0.975	0.375	0	2	NUSAP1
0	1.47831	0.976	0.323	0	2	TPX2
0	1.47356	0.999	0.925	0	2	HMGB1
0	1.47023	0.991	0.782	0	2	STMN1
0	1.45781	0.977	0.584	0	2	UBE2S
0	1.44845	0.953	0.259	0	2	ASPM
0	1.41583	0.96	0.328	0	2	RRM2
0	1.40935	0.986	0.8	0	2	HMGN2
0	1.33187	0.935	0.65	0	2	H1-2
0	1.33128	0.995	0.767	0	2	NUCB2
0	1.30846	0.954	0.388	0	2	PCLAF
0	1.29981	0.99	0.591	0	2	SMC4
0	1.29434	0.973	0.336	0	2	KNL1
0	1.29084	0.955	0.657	0	2	H1-3
0	1.26176	0.985	0.598	0	2	CD3D
0	1.23367	0.999	0.795	0	2	CDK6
0	1.22169	0.963	0.674	0	2	DUT
0	1.21592	0.977	0.825	0	2	H2AZ1
0	1.204	0.939	0.265	0	2	KIF15
0	1.19061	0.979	0.516	0	2	SMC2
0	1.17756	0.958	0.371	0	2	FANCI
0	1.13689	0.846	0.172	0	2	UBE2C
0	1.13047	0.895	0.293	0	2	CENPE
0	1.11985	0.927	0.204	0	2	BIRC5
0	1.11353	0.915	0.195	0	2	GTSE1
0	1.1016	0.966	0.441	0	2	HES4
0	1.10087	0.983	0.737	0	2	RAD21
0	1.09059	0.934	0.421	0	2	CCDC26
0	1.0905	0.951	0.587	0	2	ALYREF
0	1.08777	0.892	0.329	0	2	PTTG1
0	1.08148	0.997	0.946	0	2	GAPDH
0	1.07108	0.924	0.234	0	2	NCAPG
0	1.04946	0.967	0.475	0	2	ATAD2
0	1.04665	0.96	0.621	0	2	RANBP1
0	1.03127	0.981	0.512	0	2	ADA
0	1.02756	0.883	0.213	0	2	CDK1
0	1.02602	0.948	0.726	0	2	H1-4
0	1.02546	0.968	0.664	0	2	C12orf57
0	1.02546	0.915	0.23	0	2	CDCA5
0	1.01986	0.853	0.158	0	2	DLGAP5
0	1.011	0.921	0.357	0	2	CKS1B
0	1.00437	0.986	0.681	0	2	NASP
0	1.00269	0.992	0.833	0	2	NUCKS1
0	0.997694	0.985	0.515	0	2	SYNE2
0	0.991443	0.831	0.213	0	2	H3C4
0	0.990932	0.958	0.56	0	2	SSRP1
0	0.983704	0.939	0.413	0	2	MYO7B
0	0.981831	0.986	0.841	0	2	ANP32B
0	0.981349	0.886	0.213	0	2	KIF14
0	0.976196	0.896	0.206	0	2	NDC80
0	0.975984	0.987	0.875	0	2	MIF
0	0.97519	0.92	0.424	0	2	DHFR
0	0.973386	0.939	0.337	0	2	C21orf58
0	0.972175	0.972	0.643	0	2	ANP32E
0	0.970309	0.932	0.29	0	2	PRC1
0	0.969953	0.969	0.582	0	2	TRBC1
0	0.969262	1	0.977	0	2	PTMA
0	0.964486	0.991	0.536	0	2	MIR646HG
0	0.960322	0.96	0.404	0	2	CLSPN
0	0.954739	0.948	0.384	0	2	C12orf75
0	0.952944	0.89	0.208	0	2	NUF2
0	0.952732	0.932	0.489	0	2	PCNA
0	0.950641	0.995	0.851	0	2	HSPD1
0	0.948832	0.953	0.69	0	2	BANF1
0	0.947463	0.921	0.261	0	2	BUB1B
0	0.947227	0.889	0.333	0	2	NDST3
0	0.944225	0.938	0.464	0	2	RRM1
0	0.943495	0.982	0.826	0	2	GSTP1
0	0.939993	0.893	0.193	0	2	KIF4A
0	0.936519	0.953	0.622	0	2	TUBB4B
0	0.935934	0.904	0.298	0	2	UBE2T
0	0.934215	0.928	0.307	0	2	DIAPH3
0	0.933919	0.983	0.532	0	2	EZH2
0	0.932235	0.978	0.458	0	2	CDH4
0	0.929707	0.892	0.189	0	2	KIF2C
0	0.929705	0.962	0.645	0	2	SIVA1
0	0.925989	0.934	0.562	0	2	FXYD2
0	0.917715	0.979	0.705	0	2	RNASEH2B
0	0.917415	0.962	0.557	0	2	USP1
0	0.916824	0.732	0.181	0	2	CCNB1
0	0.914681	0.917	0.396	0	2	H2AX
0	0.913517	0.998	0.645	0	2	SOX4
0	0.911308	0.865	0.188	0	2	KIF18B
0	0.906583	0.968	0.786	0	2	RAN
0	0.904778	0.966	0.487	0	2	NCAPD3
0	0.902222	0.892	0.257	0	2	MND1
0	0.901513	0.953	0.522	0	2	CARHSP1
0	0.900935	0.972	0.755	0	2	SNRPB
0	0.898699	0.978	0.832	0	2	CHCHD2
0	0.892196	0.876	0.184	0	2	CCNA2
0	0.891648	0.968	0.723	0	2	U2AF1
0	0.890126	0.972	0.728	0	2	WWOX
0	0.884944	0.902	0.247	0	2	ESCO2
0	0.884616	0.856	0.146	0	2	AURKB
0	0.883846	0.862	0.301	0	2	MIR924HG
0	0.883012	0.897	0.28	0	2	CENPM
0	0.882073	0.964	0.413	0	2	LMNB1
0	0.880498	0.969	0.651	0	2	JPT1
0	0.875059	0.986	0.909	0	2	PFN1
0	0.873591	0.906	0.252	0	2	KIF11
0	0.871995	0.905	0.361	0	2	CENPW
0	0.871969	0.918	0.327	0	2	CCDC34
0	0.870171	0.992	0.759	0	2	FAM133B
0	0.870094	0.903	0.379	0	2	CD1E
0	0.869976	0.955	0.627	0	2	SNRPF
0	0.868478	0.99	0.863	0	2	SET
0	0.868294	0.931	0.527	0	2	FAM111A
0	0.868135	0.894	0.249	0	2	BUB1
0	0.867239	0.863	0.25	0	2	FBXO5
0	0.865784	0.961	0.616	0	2	IDH2
0	0.861986	0.955	0.636	0	2	HMGA1
0	0.858201	0.973	0.48	0	2	CD3G
0	0.855907	0.823	0.24	0	2	PRR11
0	0.850329	0.906	0.336	0	2	GXYLT2
0	0.849531	0.889	0.353	0	2	TMEM106C
0	0.848249	0.904	0.382	0	2	DTX1
0	0.847658	0.966	0.441	0	2	ATAD5
0	0.847173	0.959	0.652	0	2	SNRPD1
0	0.846303	0.988	0.844	0	2	HNRNPA1
0	0.846035	0.871	0.197	0	2	CDCA8
0	0.846028	0.908	0.251	0	2	CEP55
0	0.843496	0.991	0.846	0	2	HNRNPD
0	0.839384	0.865	0.184	0	2	SPC25
0	0.838854	0.914	0.341	0	2	BRIP1
0	0.838636	0.927	0.368	0	2	CENPU
0	0.835193	0.975	0.691	0	2	PSIP1
0	0.832824	0.927	0.381	0	2	KIF20B
0	0.832339	0.84	0.272	0	2	LINC01572
0	0.831209	0.945	0.436	0	2	CEP78
0	0.829195	0.99	0.922	0	2	PPIA
0	0.827769	0.979	0.615	0	2	NSD2
0	0.827266	0.848	0.2	0	2	CDCA2
0	0.826389	0.859	0.201	0	2	NEIL3
0	0.82472	0.829	0.287	0	2	FAM111B
0	0.823441	0.887	0.404	0	2	CHI3L2
0	0.823276	0.963	0.681	0	2	SNRPE
0	0.822537	0.987	0.509	0	2	LEF1
0	0.818998	0.779	0.142	0	2	H3C2
0	0.817494	0.981	0.731	0	2	CKLF
0	0.814879	0.997	0.922	0	2	HSP90AB1
0	0.813587	0.966	0.475	0	2	MARCKSL1
0	0.811407	0.997	0.714	0	2	PRKCA
0	0.809332	0.988	0.797	0	2	HMGN1
0	0.807315	0.9	0.346	0	2	HMGB3
0	0.804052	0.966	0.466	0	2	CD3E
0	0.803508	0.987	0.768	0	2	HSPE1
0	0.800491	0.989	0.498	0	2	CASC15
0	0.799791	0.974	0.486	0	2	LCK
0	0.796523	0.959	0.451	0	2	TOX
0	0.795918	0.921	0.378	0	2	BRCA2
0	0.795195	0.985	0.792	0	2	HNRNPAB
0	0.793745	0.976	0.632	0	2	SSBP2
0	0.791728	0.989	0.718	0	2	SEPTIN6
0	0.789802	0.939	0.377	0	2	NCAPG2
0	0.789308	0.988	0.878	0	2	RPSA
0	0.788232	0.963	0.788	0	2	EIF5A
0	0.787827	0.889	0.361	0	2	ARPP21
0	0.787276	0.974	0.847	0	2	HINT1
0	0.787192	0.926	0.415	0	2	MCM7
0	0.787163	0.927	0.488	0	2	CKS2
0	0.786182	0.928	0.365	0	2	RFC3
0	0.785009	0.877	0.376	0	2	CDKN2D
0	0.782818	0.991	0.849	0	2	HNRNPA3
0	0.782377	1	0.959	0	2	HSP90AA1
0	0.780812	0.978	0.678	0	2	TCP1
0	0.777961	0.949	0.604	0	2	BUB3
0	0.776459	0.933	0.381	0	2	MYB
0	0.776332	0.946	0.66	0	2	PSMB2
0	0.775536	0.975	0.614	0	2	CBX5
0	0.775213	0.883	0.256	0	2	MELK
0	0.775065	0.876	0.256	0	2	MAD2L1
0	0.77454	0.928	0.426	0	2	GMNN
0	0.773995	0.981	0.767	0	2	H2AZ2
0	0.773991	0.986	0.779	0	2	HNRNPR
0	0.771941	0.955	0.721	0	2	ERH
0	0.764714	0.936	0.401	0	2	ENSG00000263551
0	0.764198	0.841	0.243	0	2	MYBL2
0	0.763474	0.954	0.557	0	2	DNAJC9
0	0.760056	0.868	0.232	0	2	CIT
0	0.758673	0.992	0.897	0	2	H3-3A
0	0.756652	0.528	0.149	0	2	IGLL1
0	0.756489	0.975	0.828	0	2	SUMO2
0	0.755737	0.945	0.422	0	2	HELLS
0	0.754688	0.926	0.367	0	2	TACC3
0	0.754519	0.941	0.417	0	2	CCDC138
0	0.753558	0.859	0.285	0	2	DYNC2I2
0	0.75046	0.985	0.876	0	2	RPS5
0	0.748805	0.97	0.704	0	2	CCT2
0	0.748072	0.924	0.531	0	2	TASP1
0	0.747342	0.869	0.286	0	2	ZWINT
0	0.747186	0.973	0.739	0	2	PA2G4
0	0.74453	0.902	0.37	0	2	BRCA1
0	0.744509	0.975	0.801	0	2	SNRPD2
0	0.743446	0.859	0.245	0	2	RTKN2
0	0.743385	0.974	0.747	0	2	CCT3
0	0.743169	0.934	0.454	0	2	PAFAH1B3
0	0.742822	0.966	0.804	0	2	LDHB
0	0.741544	0.989	0.767	0	2	PRKDC
0	0.741153	0.923	0.352	0	2	ENSG00000224905
0	0.739097	0.96	0.716	0	2	LDHA
0	0.736309	0.931	0.472	0	2	MAD2L2
0	0.736297	0.939	0.468	0	2	IRF1-AS1
0	0.735249	0.879	0.438	0	2	KPNA2
0	0.734566	0.854	0.309	0	2	FEN1
0	0.731536	0.938	0.459	0	2	PAICS
0	0.73109	0.731	0.264	0	2	CDK6-AS1
0	0.73088	0.945	0.453	0	2	IKZF2
0	0.730255	0.936	0.484	0	2	CENPP
0	0.727665	0.91	0.398	0	2	ITM2A
0	0.726972	0.954	0.712	0	2	SNRPG
0	0.723767	0.955	0.617	0	2	FDPS
0	0.723481	0.814	0.152	0	2	CKAP2L
0	0.722368	0.962	0.706	0	2	SNRPD3
0	0.720384	0.96	0.792	0	2	UQCRH
0	0.719418	0.856	0.318	0	2	SIX6
0	0.718216	0.857	0.496	0	2	ENSG00000237356
0	0.717093	0.691	0.142	0	2	CDC20
0	0.714182	0.953	0.466	0	2	ZNRF1
0	0.714167	0.957	0.681	0	2	PSME2
0	0.712566	0.93	0.567	0	2	PRDX2
0	0.712116	0.942	0.429	0	2	CD7
0	0.711877	0.942	0.393	0	2	TSPAN7
0	0.711497	0.973	0.724	0	2	PPM1G
0	0.708657	0.926	0.392	0	2	CHEK1
0	0.708051	0.915	0.446	0	2	CKAP2
0	0.70595	0.835	0.238	0	2	ASF1B
0	0.705304	0.965	0.578	0	2	CDK5RAP2
0	0.704168	0.983	0.766	0	2	CORO1A
0	0.704023	0.979	0.743	0	2	SUPT16H
0	0.702755	0.945	0.616	0	2	HTATSF1
0	0.701081	0.942	0.441	0	2	VRK1
0	0.69994	0.946	0.658	0	2	LSM4
0	0.699416	0.892	0.305	0	2	ORC6
0	0.698385	0.851	0.218	0	2	SGO1
0	0.695332	0.95	0.643	0	2	ILF2
0	0.695008	0.919	0.448	0	2	MCM3
0	0.69361	0.949	0.614	0	2	PSMC3
0	0.69268	0.842	0.32	0	2	MZB1
0	0.691518	0.929	0.434	0	2	NETO2
0	0.690069	0.894	0.347	0	2	CRNDE
0	0.689904	0.982	0.739	0	2	DNMT1
0	0.688888	0.975	0.684	0	2	RBMX
0	0.687712	0.946	0.443	0	2	MMS22L
0	0.686339	0.999	0.955	0	2	HNRNPA2B1
0	0.686212	0.811	0.146	0	2	PBK
0	0.684518	0.903	0.492	0	2	RPA3
0	0.683706	0.929	0.42	0	2	CEP152
0	0.681937	0.976	0.739	0	2	SRSF3
0	0.681916	0.971	0.73	0	2	CCT5
0	0.681304	0.871	0.32	0	2	RAD51AP1
0	0.680689	0.895	0.33	0	2	BLM
0	0.679831	0.887	0.323	0	2	IGFBP2
0	0.678203	0.966	0.701	0	2	MIR181A1HG
0	0.678019	0.876	0.284	0	2	CIP2A
0	0.677535	0.98	0.671	0	2	TMPO
0	0.675794	0.981	0.867	0	2	ARHGDIB
0	0.675144	0.92	0.359	0	2	CENPK
0	0.672007	0.961	0.47	0	2	ZEB1
0	0.671985	0.809	0.177	0	2	SKA3
0	0.671044	0.65	0.121	0	2	HMMR
0	0.67072	0.934	0.376	0	2	MYH10
0	0.670181	0.767	0.168	0	2	E2F8
0	0.668557	0.894	0.417	0	2	LZTFL1
0	0.666861	0.846	0.317	0	2	SGO2
0	0.665277	0.955	0.627	0	2	CTCF
0	0.664057	0.956	0.636	0	2	SELENOW
0	0.663818	0.917	0.448	0	2	NME1
0	0.663099	0.952	0.784	0	2	SLC25A5
0	0.662004	0.828	0.217	0	2	ANLN
0	0.661473	0.949	0.626	0	2	MZT2A
0	0.660653	0.802	0.187	0	2	TTK
0	0.659139	0.959	0.61	0	2	GALNT2
0	0.65821	0.868	0.325	0	2	ECT2
0	0.657175	0.972	0.731	0	2	NUDC
0	0.656205	0.938	0.391	0	2	PARD3
0	0.655671	0.98	0.761	0	2	TAF15
0	0.655378	0.953	0.605	0	2	CBX1
0	0.654012	0.97	0.63	0	2	NOP56
0	0.653904	0.841	0.243	0	2	CENPN
0	0.653813	0.89	0.593	0	2	RPL22L1
0	0.653422	0.869	0.291	0	2	FANCD2
0	0.652387	0.892	0.29	0	2	MCM10
0	0.651998	0.964	0.661	0	2	SRSF2
0	0.651528	0.992	0.832	0	2	PTGES3
0	0.647744	0.806	0.197	0	2	CDKN3
0	0.647669	0.856	0.268	0	2	STIL
0	0.647411	0.932	0.504	0	2	PPA1
0	0.647255	0.918	0.412	0	2	ACOT7
0	0.644565	0.952	0.733	0	2	PSMA4
0	0.644144	0.841	0.247	0	2	POLQ
0	0.643896	0.926	0.39	0	2	HDGFL3
0	0.643619	0.979	0.806	0	2	PSMA6
0	0.642232	0.945	0.519	0	2	HLTF
0	0.642165	0.955	0.685	0	2	SRP9
0	0.642108	0.97	0.75	0	2	CCT6A
0	0.642054	0.891	0.388	0	2	SKA2
0	0.640923	0.876	0.397	0	2	ZC3H12B
0	0.639495	0.922	0.513	0	2	RBBP8
0	0.639058	0.85	0.336	0	2	HIRIP3
0	0.638467	0.995	0.938	0	2	RPS6
0	0.638254	0.992	0.872	0	2	XRCC5
0	0.636892	0.98	0.735	0	2	YWHAQ
0	0.634807	0.376	0.138	0	2	ENSG00000227400
0	0.632326	0.987	0.804	0	2	DEK
0	0.630696	0.959	0.56	0	2	TTF1
0	0.630673	0.967	0.491	0	2	TCF7
0	0.630276	0.987	0.733	0	2	ILF3
0	0.630171	0.931	0.427	0	2	OCIAD2
0	0.630169	0.77	0.159	0	2	KIF23
0	0.630137	0.896	0.334	0	2	KLHL23
0	0.629977	0.927	0.6	0	2	PIN1
0	0.629652	0.9	0.539	0	2	SNHG7
0	0.629458	0.985	0.673	0	2	SPTBN1
0	0.629403	0.888	0.396	0	2	MAGOHB
0	0.62871	0.917	0.564	0	2	LSM2
0	0.626768	0.998	0.954	0	2	RPS2
0	0.626577	0.847	0.374	0	2	PMEPA1
0	0.62565	0.977	0.825	0	2	UBB
0	0.622859	0.827	0.267	0	2	CDT1
0	0.621912	0.955	0.457	0	2	BCL11B
0	0.621472	0.992	0.816	0	2	PNN
0	0.620104	0.852	0.314	0	2	BEX1
0	0.62004	0.939	0.609	0	2	CCT7
0	0.618384	0.944	0.567	0	2	HDAC1
0	0.61831	0.963	0.793	0	2	NDUFS5
0	0.616956	0.896	0.48	0	2	HAUS1
0	0.61652	0.786	0.161	0	2	KIFC1
0	0.616287	0.942	0.649	0	2	NAA38
0	0.616013	0.952	0.615	0	2	LBR
0	0.615869	0.894	0.419	0	2	KIF22
0	0.615549	0.923	0.568	0	2	LSM5
0	0.614702	0.929	0.641	0	2	LSM3
0	0.613701	0.776	0.164	0	2	DEPDC1B
0	0.613123	0.997	0.92	0	2	NCL
0	0.612214	0.974	0.792	0	2	SOD1
0	0.611504	0.982	0.727	0	2	BAZ1B
0	0.610665	0.797	0.296	0	2	ENSG00000176320
0	0.608539	0.952	0.528	0	2	TMEM131L
0	0.607524	0.934	0.657	0	2	MRPL51
0	0.605725	0.798	0.266	0	2	NUDT8
0	0.604857	0.971	0.772	0	2	MZT2B
0	0.604244	0.981	0.763	0	2	CACYBP
0	0.603825	0.86	0.369	0	2	LIG1
0	0.601921	0.884	0.321	0	2	CDCA7
0	0.60154	0.992	0.757	0	2	SMARCC1
0	0.601132	0.991	0.915	0	2	RPLP0
0	0.601015	0.964	0.56	0	2	TFDP2
0	0.600859	0.985	0.755	0	2	SRSF10
0	0.60067	0.801	0.281	0	2	ENSG00000287784
0	0.600658	0.952	0.704	0	2	RBM3
0	0.600076	0.973	0.739	0	2	CCT4
0	0.599981	0.935	0.592	0	2	NUDT1
0	0.599842	0.978	0.832	0	2	ENO1
0	0.599765	0.967	0.708	0	2	ITGA4
0	0.599027	0.918	0.459	0	2	ATP2A3
0	0.595822	0.799	0.223	0	2	ARHGAP11A
0	0.595369	0.843	0.298	0	2	PDLIM1
0	0.593332	0.956	0.673	0	2	MAZ
0	0.593309	0.807	0.441	0	2	H2AC20
0	0.593167	0.781	0.216	0	2	INCENP
0	0.592596	0.99	0.828	0	2	PSMA1
0	0.590337	0.968	0.752	0	2	XRCC6
0	0.589423	0.923	0.484	0	2	ZNF22
0	0.588815	0.965	0.759	0	2	GTF3A
0	0.588775	0.662	0.133	0	2	CCNB2
0	0.588383	0.985	0.795	0	2	CBX3
0	0.587293	0.889	0.318	0	2	NCAPH
0	0.587259	0.863	0.326	0	2	SH2D1A
0	0.586298	0.978	0.719	0	2	LDLRAD4
0	0.583559	0.985	0.875	0	2	EEF1B2
0	0.582656	0.951	0.595	0	2	CCND3
0	0.582213	0.924	0.588	0	2	MAGOH
0	0.582202	0.963	0.549	0	2	KLF12
0	0.582109	0.917	0.542	0	2	CKAP5
0	0.581329	0.741	0.127	0	2	HJURP
0	0.58113	0.993	0.928	0	2	RPS3
0	0.57971	0.838	0.312	0	2	NCAPD2
0	0.579192	0.923	0.622	0	2	ATP5MC1
0	0.578496	0.952	0.567	0	2	TOPBP1
0	0.577385	0.982	0.811	0	2	DNAJA1
0	0.577265	0.903	0.513	0	2	MRPL11
0	0.576997	0.881	0.377	0	2	POLD2
0	0.576464	0.96	0.66	0	2	PARP1
0	0.575642	0.898	0.377	0	2	CHAF1A
0	0.574865	0.862	0.349	0	2	ITGB3BP
0	0.574504	0.98	0.708	0	2	RBBP4
0	0.573627	0.804	0.247	0	2	CDC45
0	0.573525	0.968	0.741	0	2	NONO
0	0.572253	0.905	0.495	0	2	SNRPA1
0	0.572216	0.955	0.733	0	2	CCT8
0	0.571429	0.942	0.722	0	2	CSNK2B
0	0.571034	0.926	0.613	0	2	C1QBP
0	0.571033	0.766	0.219	0	2	ENSG00000290886
0	0.57045	0.986	0.805	0	2	KHDRBS1
0	0.570174	0.947	0.66	0	2	PSMA5
0	0.570031	0.723	0.138	0	2	CDC25C
0	0.56974	0.964	0.679	0	2	USP14
0	0.569074	0.982	0.89	0	2	RPS17
0	0.568858	0.905	0.489	0	2	EXOSC9
0	0.568298	0.867	0.417	0	2	MZT1
0	0.568131	0.949	0.612	0	2	COA1
0	0.567999	0.929	0.578	0	2	NHP2
0	0.566911	0.987	0.903	0	2	RPS21
0	0.566779	0.952	0.588	0	2	ACSF3
0	0.565621	0.969	0.753	0	2	ATF4
0	0.565176	0.942	0.691	0	2	NDUFA12
0	0.564784	0.938	0.662	0	2	PSMA3
0	0.56458	0.84	0.32	0	2	MIS18A
0	0.56331	0.93	0.586	0	2	PRMT1
0	0.56309	0.989	0.823	0	2	HP1BP3
0	0.562517	0.69	0.219	0	2	RFX8
0	0.562488	0.99	0.929	0	2	RPS7
0	0.5624	0.947	0.707	0	2	SRSF9
0	0.562166	0.872	0.425	0	2	SNRNP25
0	0.561555	0.836	0.297	0	2	CENPV
0	0.561527	0.96	0.771	0	2	PSME1
0	0.561152	0.94	0.631	0	2	LSM7
0	0.560828	0.97	0.652	0	2	SMARCA4
0	0.559654	0.909	0.471	0	2	NUP107
0	0.558831	0.891	0.449	0	2	DBF4
0	0.558396	0.816	0.294	0	2	RPL39L
0	0.557606	0.887	0.466	0	2	SCMH1
0	0.556239	0.781	0.232	0	2	SMC1B
0	0.556142	0.924	0.612	0	2	PHB1
0	0.55521	0.718	0.156	0	2	TROAP
0	0.555042	0.695	0.142	0	2	H2AC11
0	0.554466	0.65	0.108	0	2	MXD3
0	0.554245	0.952	0.667	0	2	SMC1A
0	0.553601	0.76	0.346	0	2	PSAT1
0	0.553294	0.953	0.703	0	2	RBM8A
0	0.553129	0.848	0.283	0	2	DNA2
0	0.551894	0.984	0.812	0	2	MATR3
0	0.551639	0.935	0.632	0	2	ACP1
0	0.550608	0.878	0.462	0	2	TIMM10
0	0.55052	0.95	0.618	0	2	CEP57
0	0.550327	0.993	0.93	0	2	ACTG1
0	0.550191	0.933	0.57	0	2	AHSA1
0	0.549874	0.987	0.762	0	2	MAP4K4
0	0.548466	0.892	0.493	0	2	TPRKB
0	0.548326	0.863	0.356	0	2	WDR76
0	0.547516	0.865	0.418	0	2	PLCB1
0	0.546629	0.841	0.375	0	2	DTYMK
0	0.546413	0.959	0.703	0	2	SMARCE1
0	0.546098	0.86	0.374	0	2	MCM4
0	0.545848	0.913	0.584	0	2	NUTF2
0	0.544676	0.947	0.669	0	2	HNRNPA0
0	0.544545	0.843	0.327	0	2	RFC4
0	0.544041	0.997	0.948	0	2	RPS19
0	0.542626	0.967	0.81	0	2	COX6C
0	0.542201	0.897	0.516	0	2	LAGE3
0	0.541973	0.885	0.405	0	2	RUVBL2
0	0.540864	0.743	0.146	0	2	FOXM1
0	0.540824	0.967	0.704	0	2	STIP1
0	0.539951	0.856	0.314	0	2	DTL
0	0.539924	0.976	0.79	0	2	SF3B2
0	0.539722	0.925	0.464	0	2	STK39
0	0.539065	0.847	0.335	0	2	SIT1
0	0.538805	0.933	0.487	0	2	BICD1
0	0.53864	0.766	0.22	0	2	EXO1
0	0.53846	0.993	0.828	0	2	RB1
0	0.538258	0.759	0.262	0	2	NEXMIF
0	0.537641	0.967	0.818	0	2	COX6A1
0	0.537248	0.828	0.311	0	2	CENPH
0	0.537212	0.902	0.484	0	2	NAE1
0	0.535451	0.801	0.275	0	2	CDC6
0	0.532976	0.914	0.514	0	2	DDX39A
0	0.532371	0.974	0.764	0	2	TLE5
0	0.532103	0.924	0.614	0	2	CRIP1
0	0.531446	0.962	0.744	0	2	EIF3M
0	0.530743	0.953	0.513	0	2	MSI2
0	0.530626	0.956	0.792	0	2	COX7A2
0	0.530288	0.977	0.683	0	2	ELOVL5
0	0.530278	0.83	0.332	0	2	PRIM1
0	0.529906	0.764	0.178	0	2	SHCBP1
0	0.52968	0.948	0.69	0	2	MRPL57
0	0.529304	0.877	0.35	0	2	BCL7A
0	0.528887	0.942	0.504	0	2	TNRC6C
0	0.526306	0.889	0.403	0	2	BARD1
0	0.526125	0.987	0.835	0	2	IFI16
0	0.526056	0.928	0.592	0	2	UFD1
0	0.52504	0.868	0.407	0	2	PPIH
0	0.524975	0.938	0.701	0	2	PSMA2
0	0.52433	0.954	0.576	0	2	SRPK1
0	0.524206	0.933	0.663	0	2	SNRPC
0	0.524091	0.865	0.392	0	2	MPHOSPH9
0	0.523958	0.997	0.941	0	2	RPS15
0	0.523803	0.971	0.59	0	2	HDAC4
0	0.523339	0.805	0.266	0	2	C1orf112
0	0.522732	0.941	0.608	0	2	RNPS1
0	0.522016	0.905	0.488	0	2	SAE1
0	0.521211	0.869	0.35	0	2	MED12L
0	0.52084	0.903	0.568	0	2	TM7SF3
0	0.519706	0.963	0.74	0	2	RAD23A
0	0.519373	0.822	0.292	0	2	HHIP
0	0.519151	0.825	0.301	0	2	RFC5
0	0.518875	0.972	0.783	0	2	PCBP2
0	0.518668	0.955	0.737	0	2	UQCRQ
0	0.518564	0.719	0.14	0	2	SPC24
0	0.518414	0.961	0.667	0	2	SUZ12
0	0.518404	0.938	0.722	0	2	PSMB3
0	0.517819	0.96	0.696	0	2	PSMB7
0	0.51752	0.937	0.606	0	2	RPAIN
0	0.516118	0.99	0.791	0	2	RUNX1
0	0.515333	0.937	0.538	0	2	SEPTIN1
0	0.515023	0.797	0.331	0	2	ENSG00000273118
0	0.514022	0.974	0.755	0	2	KPNB1
0	0.513586	0.841	0.332	0	2	CEP97
0	0.513574	0.698	0.175	0	2	E2F7
0	0.513463	0.844	0.328	0	2	WDHD1
0	0.513127	0.844	0.351	0	2	CCP110
0	0.51275	0.884	0.456	0	2	CEP135
0	0.511647	0.929	0.638	0	2	PSMC5
0	0.511372	0.946	0.65	0	2	PGAM1
0	0.509451	0.722	0.172	0	2	KIF18A
0	0.508753	0.863	0.426	0	2	ELP5
0	0.507706	0.918	0.555	0	2	IFT25
0	0.507602	0.984	0.79	0	2	DDX46
0	0.507071	0.91	0.481	0	2	BEX3
0	0.50661	0.892	0.365	0	2	PIK3R3
0	0.505276	0.84	0.321	0	2	FANCA
0	0.504571	0.874	0.497	0	2	STOML2
0	0.504179	0.928	0.57	0	2	KRR1
0	0.503611	0.926	0.541	0	2	ZNF428
0	0.502361	0.927	0.673	0	2	PSMB4
0	0.501774	0.925	0.562	0	2	FBL
0	0.501482	0.922	0.437	0	2	TRBC2
0	0.501338	0.827	0.307	0	2	SYCP2
0	0.50102	0.978	0.758	0	2	FAF1
4.86e-180	0.545407	0.66	0.48	1.29e-175	2	HSPA1B

## Sheet: cluster 3
p_val	avg_log2FC	pct.1	pct.2	p_val_adj	cluster	gene
0	2.91887	0.938	0.333	0	3	CCL2
0	2.57972	1	0.625	0	3	CD74
0	2.55471	0.999	0.491	0	3	HLA-DRA
0	2.53286	0.96	0.377	0	3	RNASE1
0	2.49503	0.999	0.514	0	3	HLA-DRB1
0	2.46167	0.999	0.777	0	3	LGALS3
0	2.39008	1	0.94	0	3	PSAP
0	2.36711	0.994	0.787	0	3	GPNMB
0	2.3629	0.958	0.458	0	3	CFD
0	2.29281	0.999	0.68	0	3	CST3
0	2.27571	1	0.761	0	3	IFI30
0	2.25786	0.992	0.395	0	3	HLA-DPB1
0	2.25622	0.789	0.295	0	3	CXCL8
0	2.2522	0.995	0.421	0	3	HLA-DPA1
0	2.19126	0.976	0.363	0	3	SELENOP
0	2.14598	1	0.781	0	3	CTSS
0	2.13884	0.931	0.521	0	3	CCL3
0	2.12958	0.905	0.269	0	3	NUPR1
0	2.12152	0.944	0.516	0	3	LGMN
0	2.11069	0.834	0.493	0	3	CCL4
0	2.08877	0.877	0.376	0	3	FOS
0	2.06884	0.553	0.176	0	3	HS3ST2
0	2.01759	0.815	0.306	0	3	CCL3L3
0	2.01288	0.977	0.605	0	3	ACP5
0	2.00176	0.932	0.263	0	3	HLA-DQA1
0	1.99601	0.998	0.473	0	3	MARCKS
0	1.97863	0.983	0.339	0	3	HLA-DQB1
0	1.97536	0.999	0.556	0	3	CTSZ
0	1.93311	0.975	0.645	0	3	IER3
0	1.9243	0.991	0.392	0	3	HLA-DMB
0	1.90115	0.713	0.347	0	3	CCL4L2
0	1.88844	0.998	0.715	0	3	LGALS1
0	1.82521	0.938	0.577	0	3	NAMPT
0	1.81612	0.999	0.697	0	3	NPC2
0	1.7842	0.999	0.721	0	3	GRN
0	1.77153	0.987	0.425	0	3	HLA-DMA
0	1.76887	0.983	0.522	0	3	SGK1
0	1.74691	0.924	0.546	0	3	ZFP36
0	1.70292	0.999	0.938	0	3	CTSD
0	1.67951	0.999	0.738	0	3	SAT1
0	1.66363	0.955	0.477	0	3	PLIN2
0	1.6577	0.811	0.276	0	3	CXCL2
0	1.65623	1	0.999	0	3	FTL
0	1.61469	0.989	0.574	0	3	CPVL
0	1.59822	1	0.672	0	3	TYROBP
0	1.5931	0.866	0.307	0	3	PLAU
0	1.57089	0.8	0.303	0	3	RARRES1
0	1.56521	0.996	0.496	0	3	CTSH
0	1.527	0.674	0.266	0	3	CXCL3
0	1.52497	0.994	0.655	0	3	ASAH1
0	1.51683	0.999	0.863	0	3	CD63
0	1.50952	0.969	0.652	0	3	LRPAP1
0	1.49237	0.992	0.656	0	3	FCGRT
0	1.47138	0.982	0.722	0	3	NFKBIA
0	1.46367	0.991	0.527	0	3	IGSF6
0	1.4525	0.937	0.279	0	3	HLA-DRB6
0	1.45076	0.917	0.551	0	3	BTG2
0	1.43809	0.997	0.729	0	3	FXYD5
0	1.42029	0.996	0.749	0	3	BRI3
0	1.39266	0.795	0.325	0	3	EGR1
0	1.38946	0.776	0.197	0	3	PID1
0	1.38233	0.971	0.367	0	3	CD14
0	1.38222	0.72	0.14	0	3	SERPINF1
0	1.37795	0.998	0.593	0	3	CD68
0	1.36739	0.945	0.394	0	3	MS4A7
0	1.35733	0.966	0.712	0	3	SOD2
0	1.34918	0.806	0.22	0	3	MS4A6A
0	1.34696	1	0.999	0	3	FTH1
0	1.34035	0.87	0.279	0	3	ALDH1A1
0	1.33916	0.999	0.721	0	3	S100A6
0	1.33506	0.602	0.179	0	3	C1QA
0	1.33275	0.994	0.809	0	3	CAPG
0	1.32986	0.99	0.475	0	3	TNFAIP2
0	1.32123	0.598	0.207	0	3	GDF15
0	1.31736	0.927	0.417	0	3	MAFB
0	1.30512	0.99	0.739	0	3	CTSC
0	1.29401	0.995	0.506	0	3	TSPO
0	1.29042	0.996	0.702	0	3	PLD3
0	1.27139	0.977	0.53	0	3	BLVRB
0	1.26733	0.677	0.177	0	3	SDS
0	1.26524	0.989	0.495	0	3	CD37
0	1.26521	0.965	0.643	0	3	JUNB
0	1.26446	0.933	0.717	0	3	APOC1
0	1.26151	0.727	0.198	0	3	MARCO
0	1.25936	0.884	0.293	0	3	LINC01857
0	1.25718	0.958	0.46	0	3	PLA2G7
0	1.24967	0.999	0.56	0	3	FCER1G
0	1.24535	0.938	0.477	0	3	NINJ1
0	1.24243	1	0.967	0	3	TPT1
0	1.22533	0.949	0.78	0	3	IER2
0	1.22442	0.859	0.298	0	3	CEBPD
0	1.21561	0.826	0.452	0	3	JAKMIP2
0	1.20298	0.478	0.176	0	3	IL1B
0	1.185	0.292	0.063	0	3	CCL8
0	1.18254	0.995	0.798	0	3	ATP6V0C
0	1.17731	0.94	0.337	0	3	RAB32
0	1.17291	0.993	0.695	0	3	SDCBP
0	1.16794	0.926	0.409	0	3	FUCA1
0	1.16776	0.908	0.48	0	3	RGL1
0	1.1658	0.999	0.858	0	3	ITM2B
0	1.16134	0.979	0.53	0	3	RNASET2
0	1.15568	0.964	0.478	0	3	LY96
0	1.14656	0.827	0.282	0	3	OTOA
0	1.14312	0.949	0.469	0	3	TSPAN4
0	1.13602	0.838	0.435	0	3	CYB561A3
0	1.13572	0.967	0.493	0	3	ADA2
0	1.12472	0.989	0.783	0	3	SQSTM1
0	1.1146	0.999	0.767	0	3	HLA-E
0	1.10995	0.568	0.117	0	3	FOLR2
0	1.10635	0.914	0.329	0	3	FPR3
0	1.10051	0.997	0.848	0	3	CYBA
0	1.09787	0.987	0.567	0	3	CD9
0	1.09359	0.988	0.52	0	3	LITAF
0	1.08952	0.954	0.471	0	3	CTSA
0	1.08379	0.964	0.591	0	3	KLF6
0	1.0812	0.971	0.601	0	3	AP1S2
0	1.072	0.846	0.344	0	3	EPSTI1
0	1.07115	0.81	0.221	0	3	PHACTR1
0	1.0631	0.938	0.499	0	3	TNFRSF14
0	1.0618	0.792	0.262	0	3	IFITM3
0	1.05559	0.91	0.404	0	3	TIMP1
0	1.04691	0.729	0.268	0	3	MRC1
0	1.04447	0.966	0.465	0	3	FCHO2
0	1.03612	0.999	0.908	0	3	HLA-B
0	1.03462	0.995	0.808	0	3	GABARAP
0	1.03203	0.946	0.59	0	3	CD59
0	1.02722	0.999	0.89	0	3	HLA-A
0	1.02117	0.992	0.768	0	3	PNRC1
0	1.01905	0.922	0.47	0	3	EMP1
0	1.01024	0.725	0.283	0	3	PLPP3
0	1.00962	0.955	0.586	0	3	DPP7
0	1.00797	0.512	0.187	0	3	CTSK
0	1.0064	0.97	0.648	0	3	CEBPB
0	1.00454	0.902	0.34	0	3	RNASE6
0	1.00151	0.788	0.21	0	3	MPEG1
0	0.992319	0.978	0.551	0	3	PLEK
0	0.988345	0.901	0.332	0	3	METRNL
0	0.988251	0.963	0.425	0	3	C5AR1
0	0.986574	0.998	0.902	0	3	EIF1
0	0.981837	0.958	0.706	0	3	PABPC4
0	0.980042	0.953	0.548	0	3	RAP2B
0	0.979731	1	0.853	0	3	CTSB
0	0.971132	0.958	0.583	0	3	CHCHD10
0	0.970816	0.83	0.473	0	3	DUSP1
0	0.968673	0.938	0.622	0	3	ZFP36L1
0	0.966424	0.983	0.651	0	3	LAMP1
0	0.958538	0.743	0.562	0	3	DUSP2
0	0.956266	0.996	0.817	0	3	GPX1
0	0.953152	0.975	0.655	0	3	LAMP2
0	0.949066	0.949	0.676	0	3	CD83
0	0.945694	0.977	0.597	0	3	HEXB
0	0.93474	0.296	0.105	0	3	FCN1
0	0.931386	0.975	0.659	0	3	RNH1
0	0.930699	0.819	0.267	0	3	LACC1
0	0.928205	0.992	0.647	0	3	ANXA5
0	0.927996	0.864	0.331	0	3	MAF
0	0.924561	0.95	0.516	0	3	CREG1
0	0.918927	0.956	0.5	0	3	MFSD1
0	0.918405	0.973	0.769	0	3	CD81
0	0.918031	0.752	0.272	0	3	TLR2
0	0.91793	0.968	0.599	0	3	NAGK
0	0.908593	1	0.741	0	3	S100A11
0	0.908011	0.957	0.452	0	3	DAB2
0	0.896826	0.779	0.286	0	3	GPR183
0	0.891126	0.856	0.362	0	3	HEBP1
0	0.888627	0.995	0.842	0	3	RNASEK
0	0.885141	0.725	0.314	0	3	IRF8
0	0.883888	0.937	0.38	0	3	LY86
0	0.882861	0.991	0.776	0	3	S100A10
0	0.882103	0.909	0.347	0	3	CSTA
0	0.880907	0.807	0.382	0	3	ICAM1
0	0.879631	0.829	0.35	0	3	BHLHE40
0	0.879225	0.927	0.519	0	3	CRTAP
0	0.879101	0.984	0.658	0	3	TIMP2
0	0.878486	0.89	0.48	0	3	DNASE2
0	0.878481	0.929	0.502	0	3	CYP27A1
0	0.874928	0.945	0.54	0	3	ATP6AP1
0	0.8727	0.877	0.34	0	3	PELATON
0	0.871175	0.877	0.337	0	3	CD163
0	0.870266	0.994	0.83	0	3	CALM2
0	0.868795	0.947	0.448	0	3	CTSL
0	0.8656	0.949	0.422	0	3	CCPG1
0	0.862732	0.954	0.436	0	3	NPL
0	0.860169	0.907	0.57	0	3	NTAN1
0	0.857526	0.894	0.476	0	3	RASGEF1B
0	0.850273	0.739	0.204	0	3	PMP22
0	0.849076	0.855	0.433	0	3	CDC42EP3
0	0.849023	0.928	0.416	0	3	TYMP
0	0.84503	0.403	0.11	0	3	C1QC
0	0.844752	0.994	0.832	0	3	GPX4
0	0.842467	0.95	0.697	0	3	VAT1
0	0.841427	0.601	0.175	0	3	FCGR2B
0	0.837012	0.339	0.086	0	3	C1QB
0	0.836325	1	0.985	0	3	B2M
0	0.835221	0.997	0.806	0	3	S100A4
0	0.827646	0.592	0.212	0	3	OTOAP1
0	0.823253	0.95	0.684	0	3	ZFYVE16
0	0.819639	0.881	0.448	0	3	SPIRE1
0	0.817695	0.823	0.303	0	3	TLR4
0	0.816743	0.892	0.357	0	3	LILRB4
0	0.815556	0.986	0.902	0	3	APOE
0	0.813115	0.926	0.429	0	3	LYN
0	0.812692	0.702	0.365	0	3	DDIT3
0	0.81013	0.948	0.701	0	3	SMS
0	0.810006	0.834	0.296	0	3	C3AR1
0	0.806818	0.833	0.452	0	3	SLC9A9
0	0.806504	0.801	0.284	0	3	NCF4
0	0.806098	0.966	0.736	0	3	HIF1A
0	0.805253	0.948	0.617	0	3	VEGFB
0	0.805202	0.969	0.434	0	3	NCF2
0	0.805187	0.989	0.675	0	3	CAST
0	0.802306	0.781	0.329	0	3	MS4A4A
0	0.800967	0.788	0.295	0	3	GAS2L3
0	0.800875	0.819	0.305	0	3	CD302
0	0.800702	0.802	0.313	0	3	STARD13
0	0.793683	0.96	0.522	0	3	EMILIN2
0	0.793474	0.957	0.451	0	3	VAMP8
0	0.793163	0.787	0.277	0	3	CASP1
0	0.790785	0.852	0.536	0	3	B3GNT2
0	0.78887	0.881	0.427	0	3	GRINA
0	0.786698	0.73	0.296	0	3	NFKBIZ
0	0.782903	0.993	0.824	0	3	EMP3
0	0.779914	0.545	0.187	0	3	MX1
0	0.778716	0.97	0.683	0	3	RNF13
0	0.77781	1	0.971	0	3	VIM
0	0.776718	0.928	0.569	0	3	PTPRE
0	0.774729	0.998	0.889	0	3	ATP5F1E
0	0.768113	0.909	0.393	0	3	TNFRSF1B
0	0.765445	0.842	0.364	0	3	P2RX7
0	0.765159	0.914	0.401	0	3	ARHGAP18
0	0.764382	0.661	0.18	0	3	FXYD6
0	0.764183	0.749	0.391	0	3	KLF10
0	0.763549	0.84	0.36	0	3	BASP1
0	0.762656	0.986	0.768	0	3	ATP6V0B
0	0.760981	0.976	0.721	0	3	M6PR
0	0.754065	0.873	0.445	0	3	GNPTG
0	0.752967	0.976	0.606	0	3	AHNAK
0	0.751007	0.923	0.689	0	3	GLUL
0	0.750017	0.877	0.608	0	3	AFF1
0	0.748696	0.275	0.09	0	3	CXCL1
0	0.748618	0.88	0.358	0	3	OGFRL1
0	0.74544	0.982	0.754	0	3	ATP6V1F
0	0.744435	0.926	0.549	0	3	MGAT1
0	0.735539	0.974	0.733	0	3	CD48
0	0.734007	0.991	0.818	0	3	SLC25A6
0	0.73384	0.922	0.392	0	3	HCK
0	0.732538	0.95	0.466	0	3	MCTP1
0	0.731877	0.799	0.287	0	3	SNCA
0	0.728569	0.887	0.484	0	3	P2RX4
0	0.72801	0.872	0.505	0	3	EIF4EBP1
0	0.727387	0.986	0.844	0	3	DBI
0	0.727097	0.809	0.357	0	3	GLMP
0	0.725739	0.937	0.501	0	3	PDE4D
0	0.724889	0.903	0.463	0	3	TPP1
0	0.720725	0.557	0.225	0	3	FABP3
0	0.720138	0.998	0.855	0	3	RNF130
0	0.720111	0.662	0.202	0	3	SERPINA1
0	0.719697	0.935	0.609	0	3	HEXA
0	0.711994	0.823	0.48	0	3	PLSCR1
0	0.704977	0.86	0.37	0	3	CD4
0	0.70224	0.848	0.578	0	3	ID2
0	0.701716	0.921	0.502	0	3	MGLL
0	0.700682	0.999	0.919	0	3	RPL12
0	0.698641	0.981	0.756	0	3	NFE2L2
0	0.698516	0.964	0.7	0	3	TRAPPC5
0	0.697594	0.851	0.486	0	3	RRAGD
0	0.69722	0.883	0.57	0	3	ALKBH7
0	0.696147	0.921	0.404	0	3	SIRPA
0	0.693448	0.646	0.229	0	3	RAB42
0	0.69333	0.831	0.359	0	3	UNC93B1
0	0.691831	0.534	0.242	0	3	C2
0	0.691204	0.794	0.305	0	3	CCR1
0	0.682764	0.848	0.343	0	3	EPB41L3
0	0.678804	0.908	0.585	0	3	SRGN
0	0.677348	0.957	0.424	0	3	SPI1
0	0.676421	0.952	0.65	0	3	TMBIM4
0	0.670963	0.738	0.304	0	3	EVA1B
0	0.666489	0.883	0.367	0	3	SERPINB1
0	0.665551	0.932	0.669	0	3	RGS10
0	0.664353	0.666	0.36	0	3	LY9
0	0.664202	0.96	0.713	0	3	ERP29
0	0.662167	0.728	0.271	0	3	FCGR2A
0	0.65948	0.986	0.543	0	3	ZEB2
0	0.657799	0.794	0.372	0	3	TCEAL4
0	0.65673	0.711	0.319	0	3	GSDME
0	0.656507	0.933	0.505	0	3	MAN2B1
0	0.655764	0.871	0.579	0	3	GNPDA1
0	0.654421	0.815	0.327	0	3	PYCARD
0	0.643534	0.788	0.334	0	3	MEF2C
0	0.643027	0.999	0.91	0	3	RPS28
0	0.642863	0.958	0.644	0	3	TMEM14C
0	0.642509	0.905	0.745	0	3	NFKB1
0	0.642481	0.672	0.196	0	3	LINC01678
0	0.642272	0.985	0.835	0	3	IQGAP2
0	0.63692	0.705	0.291	0	3	KCTD12
0	0.635982	0.857	0.401	0	3	EVI2A
0	0.635364	0.722	0.251	0	3	TNFSF13
0	0.633596	0.98	0.758	0	3	ATP6V0E1
0	0.630586	0.893	0.572	0	3	USF2
0	0.630443	0.764	0.296	0	3	HMOX1
0	0.62909	0.775	0.306	0	3	CLEC7A
0	0.62822	0.791	0.313	0	3	CD86
0	0.627222	0.915	0.522	0	3	RHOQ
0	0.625642	0.909	0.545	0	3	DOCK4
0	0.62494	0.991	0.829	0	3	SH3BGRL
0	0.623127	0.614	0.259	0	3	TGFBI
0	0.621778	0.882	0.495	0	3	HLA-F
0	0.620414	0.572	0.217	0	3	PDE4B
0	0.619737	0.988	0.792	0	3	RAC1
0	0.619134	0.85	0.522	0	3	HPS1
0	0.616516	0.88	0.532	0	3	GNG10
0	0.616254	0.927	0.649	0	3	ATOX1
0	0.616088	0.905	0.614	0	3	PLAUR
0	0.615987	0.975	0.762	0	3	TOMM7
0	0.615446	0.993	0.822	0	3	TMBIM6
0	0.613263	0.907	0.683	0	3	RDX
0	0.612258	0.951	0.705	0	3	PTTG1IP
0	0.61204	0.895	0.675	0	3	SEPHS2
0	0.609423	0.995	0.77	0	3	ANXA2
0	0.607179	0.909	0.598	0	3	MPP1
0	0.606045	0.888	0.399	0	3	NRP2
0	0.604692	0.948	0.686	0	3	LAMTOR1
0	0.604227	0.964	0.748	0	3	AIF1
0	0.603142	0.994	0.852	0	3	HLA-C
0	0.600182	0.798	0.535	0	3	PIM3
0	0.59782	0.578	0.157	0	3	BNC2
0	0.590991	0.611	0.199	0	3	LILRA2
0	0.589858	0.933	0.778	0	3	FNDC3A
0	0.589053	0.488	0.156	0	3	FGL2
0	0.589004	0.874	0.558	0	3	ATP6V1C1
0	0.587869	0.601	0.171	0	3	TCN2
0	0.587095	0.914	0.59	0	3	LAPTM4A
0	0.586957	0.828	0.435	0	3	ANXA4
0	0.586617	0.886	0.699	0	3	LCP2
0	0.586582	0.684	0.238	0	3	KCNJ5
0	0.585658	0.951	0.692	0	3	RPS27L
0	0.585076	0.607	0.266	0	3	SERINC2
0	0.581576	0.858	0.343	0	3	RAB13
0	0.58057	0.833	0.379	0	3	FMN1
0	0.57977	0.893	0.554	0	3	ATP6V0D1
0	0.579246	0.694	0.271	0	3	FCGR1A
0	0.576372	0.769	0.453	0	3	ENSG00000291066
0	0.575064	0.892	0.619	0	3	PGLS
0	0.574072	0.709	0.304	0	3	RIPK2
0	0.57336	0.949	0.716	0	3	SEC11A
0	0.569737	0.811	0.564	0	3	HIVEP1
0	0.568794	0.753	0.327	0	3	TNFSF13B
0	0.567686	0.884	0.483	0	3	SCPEP1
0	0.566739	0.997	0.915	0	3	CSTB
0	0.564332	0.685	0.289	0	3	AHR
0	0.562585	0.902	0.468	0	3	KYNU
0	0.56196	0.998	0.933	0	3	PABPC1
0	0.561004	0.876	0.629	0	3	WWP1
0	0.557361	0.594	0.226	0	3	IL1R1
0	0.55697	0.689	0.3	0	3	CARD16
0	0.556961	0.935	0.689	0	3	BST2
0	0.555188	0.382	0.078	0	3	TMEM176B
0	0.553293	0.929	0.472	0	3	LRP1
0	0.553278	0.594	0.168	0	3	SIGLEC1
0	0.552795	0.905	0.465	0	3	EVI2B
0	0.550028	0.496	0.087	0	3	LILRB5
0	0.54915	0.608	0.262	0	3	PRDM1
0	0.547909	0.857	0.411	0	3	DRAM1
0	0.546464	0.908	0.629	0	3	DNAJC15
0	0.545193	0.719	0.297	0	3	IRAK3
0	0.545121	0.81	0.553	0	3	ST3GAL1
0	0.544673	0.678	0.261	0	3	SLC37A2
0	0.544394	0.693	0.26	0	3	GOLIM4
0	0.543427	0.411	0.153	0	3	HAMP
0	0.540698	0.795	0.333	0	3	SERPINB6
0	0.53807	0.759	0.368	0	3	IGFLR1
0	0.537986	0.871	0.624	0	3	ATP2B1
0	0.537768	0.924	0.449	0	3	SAMHD1
0	0.5377	0.92	0.662	0	3	NENF
0	0.536533	0.993	0.841	0	3	ARPC3
0	0.53475	0.903	0.511	0	3	CYFIP1
0	0.534002	0.713	0.439	0	3	TMEM138
0	0.533131	0.904	0.581	0	3	ATP6V1B2
0	0.532867	0.731	0.303	0	3	GGTA1
0	0.530368	0.968	0.749	0	3	NOP10
0	0.529645	0.608	0.231	0	3	ARHGAP24
0	0.529226	0.983	0.561	0	3	CYBB
0	0.527011	0.996	0.867	0	3	ARPC5
0	0.526939	0.546	0.245	0	3	SDC4
0	0.525795	0.929	0.636	0	3	CD84
0	0.525512	0.822	0.365	0	3	SLC15A3
0	0.524404	0.78	0.442	0	3	PRCP
0	0.5242	0.825	0.474	0	3	PEPD
0	0.523971	0.728	0.322	0	3	RAB20
0	0.520324	0.953	0.728	0	3	PDIA6
0	0.51911	0.826	0.463	0	3	LEPROT
0	0.518689	0.434	0.222	0	3	PHLDA1
0	0.518403	0.897	0.539	0	3	SWAP70
0	0.517612	0.694	0.305	0	3	ADAP2
0	0.517327	0.918	0.632	0	3	ABHD12
0	0.516349	0.89	0.575	0	3	IFNGR2
0	0.515251	0.921	0.687	0	3	SLC3A2
0	0.515019	0.718	0.291	0	3	CASP4
0	0.515016	0.972	0.772	0	3	PCBP1
0	0.514775	0.787	0.311	0	3	ALDH2
0	0.5145	0.75	0.395	0	3	LYSET
0	0.513371	0.76	0.411	0	3	SMIM30
0	0.512419	0.542	0.215	0	3	COLEC12
0	0.511889	0.801	0.358	0	3	CMTM7
0	0.511255	0.883	0.621	0	3	MYO5A
0	0.510651	0.527	0.131	0	3	CMKLR1
0	0.510443	0.455	0.151	0	3	EGR2
0	0.510407	0.893	0.551	0	3	STX7
0	0.51018	0.68	0.258	0	3	DUSP23
0	0.510106	0.911	0.563	0	3	REEP5
0	0.50855	0.914	0.646	0	3	ARL8B
0	0.504942	0.687	0.403	0	3	TOR3A
0	0.504524	0.915	0.628	0	3	SNX2
0	0.502501	0.8	0.451	0	3	NOTCH2
0	0.501225	0.677	0.409	0	3	MXD1
1.5e-275	0.587618	0.716	0.541	3.96e-271	3	ATF3
2.12e-221	0.53708	0.59	0.437	5.61e-217	3	H1-0
5.42e-219	0.524004	0.893	0.769	1.44e-214	3	WTAP

## Sheet: cluster 4
p_val	avg_log2FC	pct.1	pct.2	p_val_adj	cluster	gene
0	2.96507	0.793	0.325	0	4	TPRG1
0	2.69637	0.817	0.531	0	4	DOCK3
0	2.69267	0.798	0.591	0	4	ANO5
0	2.66348	0.891	0.804	0	4	TALAM1
0	2.55406	0.547	0.183	0	4	ZNF385D
0	2.52297	0.936	0.568	0	4	PLXDC2
0	2.5139	0.867	0.59	0	4	TM4SF19
0	2.45951	0.855	0.564	0	4	FRMD4B
0	2.40522	0.904	0.788	0	4	ASAP1
0	2.39245	0.967	0.902	0	4	NEAT1
0	2.34849	0.77	0.383	0	4	SLC8A1
0	2.3156	0.805	0.429	0	4	RASAL2
0	2.30514	0.877	0.488	0	4	LRMDA
0	2.29568	0.67	0.312	0	4	TMEM117
0	2.28825	0.844	0.777	0	4	NUMB
0	2.28646	0.827	0.522	0	4	PDE4D
0	2.27775	0.832	0.47	0	4	MITF
0	2.20366	0.895	0.555	0	4	MAML2
0	2.20256	0.685	0.328	0	4	ZNF804A
0	2.16062	0.627	0.292	0	4	PSD3
0	2.14333	0.842	0.671	0	4	ALCAM
0	2.08432	0.695	0.409	0	4	LINC01010
0	2.06535	0.426	0.09	0	4	ENSG00000286062
0	2.00997	0.603	0.305	0	4	GPC4
0	1.99049	0.916	0.56	0	4	ZEB2
0	1.97402	0.671	0.4	0	4	PPARG
0	1.95669	0.847	0.768	0	4	ARL15
0	1.94708	0.486	0.197	0	4	LINC00504
0	1.90118	0.884	0.594	0	4	ITGAX
0	1.88915	0.657	0.484	0	4	SNTB1
0	1.88131	0.57	0.268	0	4	ST18
0	1.87099	0.765	0.677	0	4	FNIP2
0	1.86431	0.741	0.447	0	4	TNS3
0	1.85588	0.546	0.295	0	4	CDH23
0	1.85039	0.732	0.518	0	4	FMNL2
0	1.84968	0.673	0.431	0	4	LINC00278
0	1.8491	0.809	0.622	0	4	NABP1
0	1.84866	0.723	0.668	0	4	SLC39A11
0	1.84789	0.809	0.493	0	4	RBM47
0	1.8331	0.675	0.42	0	4	SLC1A3
0	1.8263	1	1	0	4	MALAT1
0	1.81515	0.772	0.614	0	4	SLC38A6
0	1.80898	0.746	0.637	0	4	FHIT
0	1.79887	0.77	0.492	0	4	KYNU
0	1.78477	0.75	0.619	0	4	ARHGAP10
0	1.77139	0.866	0.836	0	4	DPYD
0	1.76647	0.704	0.436	0	4	MYO1E
0	1.75254	0.758	0.498	0	4	MCTP1
0	1.74714	0.728	0.676	0	4	LRCH1
0	1.746	0.489	0.196	0	4	ENSG00000259760
0	1.73375	0.763	0.659	0	4	TRIO
0	1.7313	0.812	0.732	0	4	ATG7
0	1.71428	0.541	0.314	0	4	SH3RF3
0	1.68955	0.79	0.668	0	4	FNDC3B
0	1.68514	0.749	0.74	0	4	CHD9
0	1.68038	0.588	0.338	0	4	ATP8B4
0	1.67113	0.647	0.429	0	4	GPRIN3
0	1.66677	0.632	0.399	0	4	ZC3H12C
0	1.66297	0.614	0.436	0	4	ST3GAL6
0	1.6624	0.565	0.339	0	4	CDK14
0	1.6534	0.606	0.389	0	4	CPQ
0	1.64849	0.481	0.262	0	4	MIR3142HG
0	1.64734	0.676	0.486	0	4	ATXN1
0	1.63669	0.513	0.291	0	4	ENSG00000226281
0	1.6349	0.549	0.356	0	4	MREG
0	1.62915	0.62	0.364	0	4	NRP1
0	1.62745	0.797	0.794	0	4	RAPGEF1
0	1.61438	0.663	0.507	0	4	DAPK1
0	1.61319	0.645	0.441	0	4	ARHGAP31
0	1.60845	0.791	0.772	0	4	FTX
0	1.60368	0.804	0.82	0	4	MEF2A
0	1.59891	0.727	0.573	0	4	DOCK4
0	1.59418	0.751	0.516	0	4	DOCK8
0	1.58832	0.906	0.876	0	4	CCDC88A
0	1.58231	0.632	0.527	0	4	ACSL1
0	1.5822	0.551	0.319	0	4	L3MBTL4
0	1.57115	0.47	0.253	0	4	CNIH3
0	1.55705	0.688	0.577	0	4	ZNF438
0	1.55214	0.461	0.2	0	4	THRB
0	1.54934	0.664	0.539	0	4	MGLL
0	1.54682	0.572	0.44	0	4	HDAC9
0	1.53448	0.62	0.554	0	4	MAP4K3
0	1.51182	0.748	0.742	0	4	DENND4C
0	1.51154	0.614	0.429	0	4	TRPS1
0	1.50939	0.572	0.418	0	4	FMN1
0	1.50679	0.624	0.595	0	4	MAP3K5
0	1.5007	0.674	0.595	0	4	LINC-PINT
0	1.49632	0.786	0.694	0	4	DMXL2
0	1.47937	0.652	0.595	0	4	ABR
0	1.47406	0.516	0.34	0	4	CPEB2
0	1.46914	0.549	0.338	0	4	MYOF
0	1.46387	0.508	0.322	0	4	WDFY4
0	1.46339	0.682	0.53	0	4	PTPN12
0	1.45475	0.702	0.714	0	4	RABGEF1
0	1.4476	0.817	0.823	0	4	UBE2E2
0	1.44544	0.468	0.252	0	4	FLRT2
0	1.44446	0.634	0.503	0	4	PTPRJ
0	1.44085	0.561	0.377	0	4	ARHGAP22
0	1.43975	0.639	0.456	0	4	CHIT1
0	1.43595	0.577	0.409	0	4	FGD4
0	1.42181	0.706	0.552	0	4	CD44
0	1.41622	0.392	0.176	0	4	ENSG00000286153
0	1.41504	0.367	0.16	0	4	LINC01374
0	1.40701	0.662	0.547	0	4	SHTN1
0	1.40662	0.598	0.442	0	4	NRP2
0	1.40168	0.606	0.451	0	4	ABCA1
0	1.35194	0.395	0.194	0	4	MSC-AS1
0	1.34791	0.645	0.524	0	4	MYO1F
0	1.34753	0.639	0.611	0	4	LYST
0	1.33133	0.593	0.367	0	4	LPL
0	1.32997	0.443	0.248	0	4	DCSTAMP
0	1.32708	0.736	0.771	0	4	TANK
0	1.32026	0.681	0.697	0	4	SNX29
0	1.31779	0.587	0.441	0	4	TFEC
0	1.31027	0.618	0.47	0	4	CPM
0	1.30002	0.346	0.086	0	4	CT69
0	1.28416	0.741	0.827	0	4	USP15
0	1.2642	0.412	0.217	0	4	ZMIZ1-AS1
0	1.25576	0.764	0.798	0	4	ETV6
0	1.25478	0.777	0.831	0	4	EXOC4
0	1.22444	0.729	0.788	0	4	RAD51B
0	1.20792	0.794	0.807	0	4	QKI
0	1.19658	0.372	0.184	0	4	TM4SF19-AS1
0	1.18954	0.747	0.831	0	4	LPP
0	1.17156	0.716	0.562	0	4	CD36
0	1.16662	0.348	0.155	0	4	ME3
0	1.14913	0.712	0.504	0	4	FCHO2
0	1.14805	0.796	0.562	0	4	MSR1
0	1.13151	0.301	0.1	0	4	RGS20
0	1.13044	0.772	0.847	0	4	ZFAND3
0	1.09771	0.336	0.122	0	4	ENSG00000204971
0	1.09489	0.736	0.811	0	4	MYO9B
0	1.08901	0.33	0.133	0	4	CDCP1
0	1.03028	0.757	0.875	0	4	N4BP2L2
0	1.01319	0.252	0.054	0	4	ENSG00000287962
0	0.989993	0.837	0.923	0	4	ARHGAP15
0	0.982404	0.768	0.876	0	4	TAOK3
0	0.916051	0.785	0.888	0	4	JMJD1C
1.62e-306	1.3544	0.614	0.517	4.3e-302	4	PIK3AP1
7.63e-305	1.30326	0.65	0.645	2.02e-300	4	ZSWIM6
1.81e-302	1.18889	0.71	0.78	4.8e-298	4	DOCK10
8.05e-302	1.0159	0.73	0.84	2.13e-297	4	MED13L
5.14e-301	1.34364	0.508	0.355	1.36e-296	4	PLD1
2.18e-300	1.29756	0.344	0.164	5.77e-296	4	ENSG00000284930
7.24e-300	1.15624	0.691	0.763	1.92e-295	4	SBF2
6.01e-299	1.46884	0.549	0.45	1.59e-294	4	ITPKB
1.62e-298	1.20094	0.67	0.739	4.3e-294	4	ATP9B
1.72e-296	1.21503	0.707	0.718	4.55e-292	4	ZFYVE16
1.04e-295	1.17894	0.685	0.748	2.75e-291	4	BMP2K
1.98e-292	1.29288	0.655	0.693	5.24e-288	4	ATP6V1H
1.05e-290	1.29937	0.419	0.246	2.78e-286	4	PTPRM
1.27e-290	1.23257	0.429	0.253	3.37e-286	4	ATP6V0D2
4.22e-288	0.988433	0.261	0.098	1.12e-283	4	KCNK13
1.79e-287	1.03485	0.767	0.785	4.75e-283	4	NFE2L2
5.19e-287	1.10012	0.694	0.784	1.37e-282	4	EIF4G3
1.63e-286	1.0398	0.72	0.799	4.32e-282	4	CERT1
2.05e-283	1.35487	0.459	0.304	5.44e-279	4	NEK6
4.67e-281	1.2663	0.416	0.234	1.24e-276	4	MEIKIN
9.95e-278	0.938658	0.777	0.871	2.64e-273	4	DLEU2
1.21e-277	0.970848	0.724	0.64	3.2e-273	4	MMP9
1.86e-277	1.15988	0.677	0.758	4.92e-273	4	ERC1
3.19e-276	1.38845	0.583	0.53	8.46e-272	4	DDX60L
7.45e-273	1.28113	0.475	0.329	1.97e-268	4	GPD2
2.74e-271	1.26326	0.373	0.201	7.26e-267	4	SEMA3C
2.17e-268	1.15336	0.681	0.767	5.75e-264	4	DIAPH2
1.5e-264	1.34521	0.571	0.513	3.98e-260	4	ENSG00000226824
1.23e-263	1.25095	0.41	0.251	3.26e-259	4	KCNE1
2.91e-256	1.26419	0.598	0.577	7.7e-252	4	WDFY3
2.88e-253	1.31634	0.569	0.523	7.62e-249	4	FGD6
3.95e-253	1.25819	0.454	0.305	1.05e-248	4	SLC22A15
2.7e-252	0.881839	0.251	0.1	7.16e-248	4	SPOCD1
6.61e-252	0.68181	0.821	0.944	1.75e-247	4	MBNL1
2.03e-251	1.25536	0.605	0.594	5.39e-247	4	DNAAF9
9.91e-250	1.09493	0.449	0.279	2.63e-245	4	AQP9
2.83e-246	1.32662	0.596	0.564	7.5e-242	4	NCEH1
1.33e-240	1.13776	0.295	0.138	3.52e-236	4	SLC28A3
2.1e-238	1.2769	0.609	0.615	5.55e-234	4	GPCPD1
1.27e-236	0.970846	0.631	0.499	3.38e-232	4	DAB2
4.29e-236	0.867419	0.736	0.867	1.14e-231	4	UTRN
9.09e-234	1.34052	0.466	0.33	2.41e-229	4	SAMD4A
1.05e-229	1.0473	0.679	0.792	2.77e-225	4	VTI1A
8.45e-222	0.961919	0.693	0.519	2.24e-217	4	TNFAIP2
5.76e-221	1.13429	0.563	0.454	1.53e-216	4	DRAM1
2.12e-219	1.20378	0.649	0.721	5.61e-215	4	ATP13A3
3.09e-219	1.30578	0.554	0.518	8.2e-215	4	TBC1D8
5.66e-217	1.06986	0.344	0.195	1.5e-212	4	MOB3B
1.41e-216	1.2161	0.354	0.207	3.72e-212	4	DTNA
3.59e-215	1.26576	0.584	0.594	9.52e-211	4	PRKAG2
8.03e-215	1.23163	0.558	0.514	2.13e-210	4	ZFHX3
6.34e-213	0.962529	0.287	0.14	1.68e-208	4	AFAP1L1
8.63e-213	0.896855	0.72	0.827	2.29e-208	4	IGF2R
5.77e-209	1.20665	0.598	0.636	1.53e-204	4	PDE8A
2.59e-208	1.21008	0.602	0.561	6.87e-204	4	PIK3R5
1.12e-202	1.00618	0.667	0.795	2.96e-198	4	COP1
2.36e-202	1.01789	0.655	0.773	6.25e-198	4	CELF1
8.47e-200	1.27365	0.5	0.431	2.24e-195	4	ALPK1
5.07e-197	1.19015	0.416	0.293	1.34e-192	4	NR1H3
4.94e-196	1.17936	0.592	0.624	1.31e-191	4	TAB2
5.65e-196	1.20622	0.607	0.654	1.5e-191	4	SUMF1
1.01e-194	1.18683	0.461	0.353	2.68e-190	4	ITGA3
1.76e-194	0.987379	0.683	0.792	4.66e-190	4	ITPR2
4.2e-194	0.838332	0.809	0.896	1.11e-189	4	CHST11
8.84e-194	0.723665	0.725	0.88	2.34e-189	4	ROCK1
1.39e-193	1.23061	0.628	0.7	3.69e-189	4	PBX3
1.18e-192	0.86237	0.261	0.126	3.13e-188	4	MIR34AHG
6.07e-191	0.957172	0.664	0.783	1.61e-186	4	VPS13B
7.23e-191	2.20824	0.52	0.479	1.92e-186	4	PALLD
7.34e-191	0.622344	0.748	0.596	1.94e-186	4	CYBB
8.98e-191	1.63104	0.546	0.541	2.38e-186	4	DYNLT2B
6.27e-186	0.799657	0.698	0.862	1.66e-181	4	CYRIB
1.25e-183	0.72502	0.682	0.539	3.32e-179	4	CYP27A1
9.96e-183	1.2572	0.568	0.594	2.64e-178	4	RREB1
5.74e-181	0.852638	0.663	0.757	1.52e-176	4	ANKRD36C
2.64e-180	1.11169	0.398	0.269	6.99e-176	4	SLC11A1
3e-179	1.12508	0.381	0.259	7.96e-175	4	ENTPD1
8.81e-177	0.933219	0.699	0.814	2.33e-172	4	LIMS1
1.91e-174	1.11652	0.384	0.266	5.07e-170	4	SRGAP1
1.97e-174	0.928401	0.683	0.807	5.23e-170	4	JARID2
2.68e-174	1.78035	0.323	0.185	7.09e-170	4	TIMP3
1.43e-173	0.957576	0.68	0.818	3.79e-169	4	SPAG9
1.99e-172	0.990485	0.643	0.77	5.27e-168	4	BIRC6
2.97e-171	1.26635	0.567	0.568	7.87e-167	4	B4GALT5
9.49e-170	0.97095	0.645	0.695	2.51e-165	4	SYK
5.21e-169	1.10355	0.468	0.377	1.38e-164	4	RIN2
2.29e-168	1.192	0.504	0.447	6.07e-164	4	TBC1D2
3.99e-168	1.10542	0.567	0.572	1.06e-163	4	CPEB4
2.82e-166	1.18044	0.384	0.268	7.46e-162	4	GCNT2
2.27e-164	1.27619	0.463	0.357	6.02e-160	4	KMO
4.73e-164	0.903643	0.661	0.802	1.25e-159	4	ARID1B
6.29e-164	1.00362	0.628	0.733	1.67e-159	4	NFAT5
1.78e-162	0.930131	0.671	0.813	4.72e-158	4	AKAP13
6.64e-162	1.10647	0.585	0.639	1.76e-157	4	IL17RA
2.59e-158	1.06099	0.468	0.393	6.87e-154	4	PRAM1
1.33e-157	1.16072	0.579	0.619	3.52e-153	4	BAZ2B
9.04e-157	1.10008	0.456	0.374	2.39e-152	4	CPNE8
1.91e-156	0.957811	0.644	0.791	5.07e-152	4	PIAS1
3.97e-156	1.14019	0.397	0.298	1.05e-151	4	NHSL1
1.57e-155	1.07513	0.623	0.724	4.15e-151	4	ARHGAP26
3.55e-152	0.881213	0.577	0.49	9.41e-148	4	NPL
2.09e-151	0.953955	0.646	0.793	5.53e-147	4	RBMS1
3.7e-151	1.09561	0.49	0.42	9.8e-147	4	GSAP
2.02e-149	1.03221	0.633	0.77	5.35e-145	4	NSMCE2
8.08e-149	1.11237	0.409	0.318	2.14e-144	4	SLC26A11
1.46e-147	1.12036	0.599	0.704	3.86e-143	4	MGAT5
1.51e-147	1.00782	0.563	0.522	3.99e-143	4	RASGEF1B
3.95e-146	1.18778	0.574	0.609	1.05e-141	4	TSC22D1
1.23e-145	1.10433	0.443	0.361	3.25e-141	4	RASGRP3
7.49e-145	0.992706	0.631	0.777	1.98e-140	4	MAPKAP1
8.31e-145	0.760669	0.702	0.867	2.2e-140	4	ACAP2
7.69e-144	1.1545	0.502	0.462	2.04e-139	4	PLXNC1
4.57e-143	0.978274	0.623	0.74	1.21e-138	4	CSGALNACT2
1.17e-141	1.25821	0.678	0.774	3.1e-137	4	NFKB1
2.11e-141	1.12224	0.477	0.433	5.59e-137	4	SLC12A6
7.41e-141	0.800511	0.696	0.844	1.96e-136	4	TBC1D5
1.05e-139	1.0681	0.407	0.295	2.78e-135	4	SDC2
1.91e-139	1.02485	0.598	0.708	5.05e-135	4	HERC4
4.32e-137	1.08775	0.559	0.603	1.15e-132	4	MANBA
9.63e-137	0.946338	0.635	0.786	2.55e-132	4	TBC1D22A
3.98e-134	1.16294	0.503	0.479	1.05e-129	4	GAB2
3e-133	1.02889	0.416	0.331	7.96e-129	4	CD109
2.76e-132	0.937608	0.629	0.763	7.3e-128	4	PICALM
2.86e-131	1.28115	0.424	0.346	7.58e-127	4	RNF144B
2.33e-130	0.992816	0.61	0.739	6.18e-126	4	ADK
1.41e-128	1.1704	0.442	0.364	3.72e-124	4	STARD13
1.99e-127	1.13816	0.428	0.366	5.27e-123	4	NEDD9
3.3e-127	1.01209	0.595	0.715	8.74e-123	4	FNIP1
8.24e-127	0.631811	0.712	0.836	2.18e-122	4	GRK3
6.18e-126	1.13106	0.517	0.533	1.64e-121	4	MCU
9.56e-122	0.956871	0.605	0.714	2.53e-117	4	DMXL1
1.8e-120	1.01827	0.451	0.404	4.77e-116	4	EVI5
3.95e-120	1.21275	0.517	0.553	1.05e-115	4	SERTAD2
9.61e-120	0.982733	0.593	0.671	2.55e-115	4	CFLAR
2.99e-119	0.562856	0.755	0.759	7.92e-115	4	LIPA
2.79e-118	1.0424	0.487	0.452	7.41e-114	4	ASPH
7.65e-117	0.700149	0.703	0.819	2.03e-112	4	PDE3B
9.83e-116	1.13467	0.468	0.437	2.61e-111	4	SPRED1
2.79e-115	0.945903	0.556	0.482	7.39e-111	4	LYN
4.96e-115	1.07596	0.583	0.66	1.31e-110	4	CD58
7.02e-115	0.958036	0.616	0.753	1.86e-110	4	NR3C1
1.33e-113	0.927977	0.291	0.194	3.51e-109	4	EPB41L1
4.67e-113	1.14045	0.508	0.528	1.24e-108	4	JAK2
1.33e-112	1.01974	0.619	0.757	3.53e-108	4	TRAF3
2.52e-112	0.985729	0.594	0.724	6.68e-108	4	SDCCAG8
6.17e-112	0.529211	0.739	0.871	1.63e-107	4	GNAQ
2.53e-111	1.01939	0.394	0.32	6.7e-107	4	ITGB5
1.78e-110	0.955132	0.609	0.74	4.71e-106	4	SIK3
1.13e-108	0.932953	0.623	0.778	3e-104	4	BACH1
8.24e-108	0.878041	0.63	0.776	2.18e-103	4	RABGAP1L
3.44e-107	1.0052	0.58	0.69	9.11e-103	4	FBXO11
5.32e-107	0.73696	0.675	0.838	1.41e-102	4	RAB10
1.11e-106	1.0159	0.533	0.573	2.95e-102	4	PHACTR2
5.33e-106	0.751912	0.647	0.826	1.41e-101	4	ANKRD17
7.19e-106	0.79565	0.652	0.833	1.9e-101	4	SEPTIN9
2.23e-105	0.84247	0.605	0.71	5.9e-101	4	LINC00342
8.17e-105	0.790717	0.653	0.801	2.16e-100	4	SPIDR
1.97e-104	1.08138	0.469	0.421	5.22e-100	4	NIBAN1
6.79e-104	0.910289	0.5	0.463	1.8e-99	4	SKAP2
1.45e-103	1.01319	0.566	0.654	3.85e-99	4	EML4
4.37e-102	1.00781	0.471	0.436	1.16e-97	4	MDFIC
1.18e-99	0.656614	0.68	0.882	3.13e-95	4	VPS13C
1.98e-98	0.88039	0.289	0.2	5.23e-94	4	LONRF3
2.97e-98	0.735791	0.652	0.838	7.87e-94	4	CYTH1
1.07e-96	1.05613	0.393	0.348	2.83e-92	4	SLC4A8
5.11e-95	1.02756	0.576	0.698	1.35e-90	4	COMMD10
8.36e-94	1.19111	0.433	0.407	2.21e-89	4	AMPD3
3.64e-93	0.868983	0.495	0.451	9.63e-89	4	RAB31
3.95e-93	0.692052	0.647	0.838	1.05e-88	4	ZNF638
4.44e-93	1.19074	0.507	0.563	1.18e-88	4	MFHAS1
6.52e-93	0.677952	0.665	0.853	1.73e-88	4	ERBIN
1.29e-91	1.03401	0.497	0.533	3.42e-87	4	RIN3
1.56e-91	0.927634	0.505	0.5	4.13e-87	4	SPIRE1
2.57e-90	0.706414	0.632	0.72	6.82e-86	4	FDX1
5.19e-90	1.037	0.408	0.367	1.38e-85	4	EPS8
2.93e-89	0.846357	0.602	0.761	7.77e-85	4	WSB1
8.61e-88	0.651098	0.66	0.849	2.28e-83	4	ASH1L
8.66e-87	0.93185	0.32	0.244	2.29e-82	4	ABCC3
4.37e-86	1.02882	0.536	0.635	1.16e-81	4	ZMIZ1
7.68e-86	0.992307	0.542	0.642	2.03e-81	4	KIF1B
2.22e-85	1.03523	0.531	0.607	5.89e-81	4	TANC2
4.56e-85	1.03815	0.539	0.638	1.21e-80	4	TMCC1
9.35e-84	0.723122	0.543	0.524	2.48e-79	4	GSN
1.68e-83	0.917293	0.598	0.764	4.46e-79	4	CAB39
3.08e-83	0.63027	0.669	0.873	8.15e-79	4	KMT2E
4.61e-83	1.02121	0.53	0.603	1.22e-78	4	CAMK2D
9.24e-83	1.03398	0.416	0.393	2.45e-78	4	MSRA
1.81e-81	0.931709	0.61	0.779	4.8e-77	4	PRKCB
3.64e-81	0.921284	0.27	0.192	9.65e-77	4	FARP1
8.96e-81	1.02194	0.493	0.546	2.37e-76	4	SLC6A6
2.47e-80	1.04264	0.536	0.636	6.53e-76	4	RASA1
2.85e-80	0.991266	0.455	0.469	7.55e-76	4	DOCK5
2.88e-80	1.09491	0.437	0.433	7.63e-76	4	ARSB
3.81e-80	0.94675	0.554	0.679	1.01e-75	4	RNF19A
9.25e-79	1.03067	0.344	0.287	2.45e-74	4	MIR3667HG
2.6e-78	1.06559	0.481	0.525	6.88e-74	4	PDLIM5
2.8e-77	0.832788	0.28	0.206	7.41e-73	4	UGGT2
3.02e-77	0.583353	0.68	0.882	8.01e-73	4	ELF1
9.75e-76	0.927239	0.562	0.687	2.58e-71	4	AHI1
1.07e-75	0.87338	0.595	0.761	2.84e-71	4	TENT2
3.29e-75	0.512291	0.593	0.512	8.72e-71	4	PLA2G7
9.97e-74	1.0542	0.51	0.57	2.64e-69	4	CBLB
8.7e-73	0.933735	0.573	0.729	2.31e-68	4	HS2ST1
2.5e-72	1.16293	0.516	0.602	6.62e-68	4	EPB41L2
1.37e-71	0.788504	0.628	0.728	3.63e-67	4	RNF13
1.39e-71	0.841076	0.437	0.415	3.67e-67	4	FGR
4.18e-71	0.939015	0.348	0.3	1.11e-66	4	KIF13A
9.81e-71	0.994426	0.409	0.391	2.6e-66	4	MAP4K3-DT
1.04e-70	1.0707	0.416	0.4	2.75e-66	4	MAML3
5.43e-70	1.03209	0.358	0.306	1.44e-65	4	CSF1
5.7e-70	0.602237	0.68	0.87	1.51e-65	4	ANKRD12
8.79e-70	1.02363	0.349	0.305	2.33e-65	4	SPSB1
2.86e-69	1.05505	0.295	0.232	7.58e-65	4	LINC01500
3.11e-69	1.03516	0.459	0.482	8.24e-65	4	JAZF1
1.27e-68	0.925716	0.464	0.475	3.36e-64	4	PLXND1
6.18e-68	0.9106	0.315	0.244	1.64e-63	4	MIR155HG
5.43e-67	0.837295	0.582	0.747	1.44e-62	4	CEP170
1.02e-66	0.970788	0.374	0.335	2.69e-62	4	GPAT3
1.02e-66	0.898366	0.5	0.505	2.71e-62	4	AOAH
3.1e-66	0.975128	0.52	0.626	8.22e-62	4	ZMYND8
5.08e-66	0.976953	0.522	0.617	1.35e-61	4	GMDS-DT
1.79e-65	0.972029	0.504	0.57	4.74e-61	4	PPP3CA
2.29e-65	0.974224	0.553	0.651	6.08e-61	4	AFF1
6.52e-64	1.03245	0.456	0.493	1.73e-59	4	SUSD6
2.84e-63	0.998645	0.504	0.577	7.52e-59	4	NPC1
4.9e-63	0.949297	0.515	0.613	1.3e-58	4	SOS1
5.66e-63	0.601165	0.653	0.716	1.5e-58	4	CD83
7.12e-63	0.970771	0.514	0.625	1.89e-58	4	VPS8
1.37e-62	0.960572	0.523	0.635	3.62e-58	4	NCOA3
2.36e-62	1.04623	0.459	0.493	6.26e-58	4	TTC28
3.77e-62	0.712666	0.252	0.183	9.98e-58	4	ENSG00000228655
4.21e-62	0.953918	0.505	0.588	1.12e-57	4	CLIP4
8.3e-62	0.738171	0.489	0.46	2.2e-57	4	ARHGAP18
8.59e-62	0.704739	0.646	0.815	2.28e-57	4	FNDC3A
1.03e-61	0.908879	0.354	0.324	2.72e-57	4	LIMK1
5.83e-61	0.575012	0.69	0.868	1.54e-56	4	RAB7A
6.61e-61	0.786313	0.594	0.788	1.75e-56	4	UVRAG
1.16e-60	0.943791	0.357	0.322	3.07e-56	4	FAM20C
2.15e-60	0.991364	0.348	0.32	5.7e-56	4	PPARGC1B
2.89e-60	0.944175	0.535	0.657	7.65e-56	4	ARAP2
3.77e-60	1.02747	0.48	0.558	9.99e-56	4	DOP1B
7.55e-60	0.990717	0.374	0.336	2e-55	4	SASH1
2.11e-58	0.992235	0.495	0.577	5.59e-54	4	KLHL5
2.49e-58	0.6713	0.632	0.845	6.61e-54	4	DOCK2
1.01e-57	0.64235	0.631	0.839	2.66e-53	4	KMT2C
3.77e-57	0.966126	0.471	0.538	9.98e-53	4	TSC22D2
5.82e-57	0.834204	0.292	0.24	1.54e-52	4	LRRK1
1.65e-56	0.766468	0.256	0.197	4.37e-52	4	DOCK1
1.93e-56	0.898889	0.36	0.32	5.11e-52	4	ME1
1.68e-55	0.919687	0.31	0.266	4.46e-51	4	LINC02785
9.09e-55	0.886767	0.364	0.345	2.41e-50	4	PTK2
1.58e-54	0.584522	0.624	0.571	4.19e-50	4	LITAF
1.42e-53	0.905012	0.497	0.571	3.77e-49	4	SGMS1
1.55e-53	0.871609	0.36	0.331	4.1e-49	4	ITGAM
4.33e-52	0.74231	0.611	0.794	1.15e-47	4	GAS7
1.26e-51	0.972109	0.452	0.503	3.35e-47	4	DGKH
4.73e-51	1.01055	0.514	0.629	1.25e-46	4	USP12
7.3e-51	0.845257	0.534	0.678	1.93e-46	4	USP32
1.1e-50	0.884767	0.334	0.302	2.91e-46	4	MTAP
1.13e-50	0.69111	0.596	0.781	2.99e-46	4	RERE
3.55e-50	1.00231	0.456	0.531	9.41e-46	4	SLC23A2
4.79e-50	0.72501	0.604	0.79	1.27e-45	4	ELMO1
1.68e-49	0.746037	0.599	0.764	4.44e-45	4	REL
4.06e-49	0.951194	0.444	0.476	1.08e-44	4	RPS6KA2
6.71e-49	0.97875	0.433	0.485	1.78e-44	4	GARS1-DT
1.44e-48	0.891604	0.515	0.649	3.82e-44	4	WDR7
1.48e-48	0.89217	0.521	0.663	3.92e-44	4	RNF111
1.86e-47	0.910708	0.419	0.451	4.94e-43	4	CTNND1
3.4e-47	0.546302	0.669	0.89	9.02e-43	4	OSBPL8
3.83e-47	0.719509	0.572	0.749	1.01e-42	4	PAN3
4.46e-47	0.860249	0.552	0.725	1.18e-42	4	TBC1D1
4.6e-47	0.777257	0.503	0.565	1.22e-42	4	CYFIP1
6.64e-47	0.770886	0.268	0.221	1.76e-42	4	RIPK2-DT
1.67e-46	0.822292	0.255	0.206	4.43e-42	4	KCP
1.73e-46	0.79178	0.567	0.762	4.59e-42	4	HECTD1
6.32e-45	0.907629	0.351	0.332	1.67e-40	4	ELL2
4.08e-44	0.698202	0.588	0.787	1.08e-39	4	UBR5
2.09e-43	0.980271	0.325	0.303	5.53e-39	4	TTC39B
4.34e-43	0.699483	0.604	0.794	1.15e-38	4	RAP1A
5.25e-43	0.818776	0.284	0.246	1.39e-38	4	BCAR3
8.37e-43	0.999591	0.483	0.591	2.22e-38	4	FOXO3
2.16e-42	0.840539	0.301	0.267	5.72e-38	4	AMZ1
5.82e-41	0.7935	0.453	0.456	1.54e-36	4	HCK
1.57e-40	0.832452	0.325	0.307	4.17e-36	4	CHFR
2.12e-40	0.842562	0.297	0.271	5.61e-36	4	ZBED3-AS1
4.92e-40	0.821466	0.549	0.727	1.3e-35	4	EEA1
5.29e-40	0.892633	0.54	0.697	1.4e-35	4	CHN2
8.83e-40	0.744406	0.58	0.726	2.34e-35	4	RDX
1.39e-39	0.73231	0.573	0.774	3.67e-35	4	AFF4
3.28e-39	0.78821	0.507	0.58	8.69e-35	4	ATP1B1
1.1e-38	0.871194	0.503	0.636	2.91e-34	4	DENND1B
3.25e-38	0.828862	0.509	0.626	8.62e-34	4	CORO1C
8.66e-38	0.926649	0.483	0.601	2.29e-33	4	OSBPL3
2.21e-37	0.867696	0.51	0.661	5.86e-33	4	ACER3
5.58e-37	0.829694	0.303	0.278	1.48e-32	4	TBC1D9
4.78e-36	0.701184	0.579	0.78	1.27e-31	4	ITFG1
4.99e-36	0.650116	0.581	0.751	1.32e-31	4	MBD5
6.16e-36	0.877459	0.49	0.615	1.63e-31	4	PSEN1
2.42e-35	0.840682	0.522	0.682	6.41e-31	4	PARP8
3.44e-35	0.851489	0.336	0.334	9.12e-31	4	HK2
5.63e-35	0.85471	0.32	0.309	1.49e-30	4	TPK1
2.42e-34	0.84057	0.477	0.589	6.4e-30	4	ARHGEF3
3.87e-34	0.679818	0.261	0.224	1.02e-29	4	CD276
4.28e-34	0.825491	0.497	0.603	1.13e-29	4	STX7
5.9e-34	1.00769	0.467	0.567	1.56e-29	4	TDRD3
1.41e-33	0.636997	0.596	0.798	3.75e-29	4	FCHSD2
2.7e-33	0.865569	0.502	0.626	7.15e-29	4	BCAT1
4.97e-33	0.612152	0.503	0.53	1.32e-28	4	LRP1
5.06e-33	0.528963	0.525	0.525	1.34e-28	4	EMP1
8.12e-33	0.906206	0.428	0.502	2.15e-28	4	WDFY1
1.06e-32	0.901964	0.366	0.383	2.81e-28	4	DST
7.45e-32	0.882666	0.456	0.55	1.97e-27	4	SGK3
8.75e-32	0.864668	0.424	0.466	2.32e-27	4	TBXAS1
1.04e-31	0.99643	0.499	0.605	2.76e-27	4	HIVEP1
2.29e-31	0.774589	0.534	0.712	6.08e-27	4	NCOA1
8.69e-31	0.539012	0.614	0.808	2.3e-26	4	SSH2
1.89e-30	0.900247	0.442	0.536	5e-26	4	AVL9
3.27e-30	0.903721	0.429	0.509	8.66e-26	4	THADA
1.69e-29	0.679255	0.262	0.237	4.48e-25	4	TBC1D12
1.92e-29	0.893518	0.446	0.538	5.1e-25	4	ARRB1
2.07e-29	1.008	0.424	0.499	5.48e-25	4	GBE1
2.64e-29	0.604728	0.588	0.811	6.99e-25	4	AP3B1
2.97e-29	0.785757	0.287	0.271	7.88e-25	4	ZNF516
6.92e-29	0.593244	0.623	0.842	1.83e-24	4	MBP
1.33e-28	0.686531	0.574	0.803	3.53e-24	4	MAP3K2
3e-28	1.11295	0.486	0.499	7.94e-24	4	JAKMIP2
3.42e-28	0.583604	0.596	0.824	9.05e-24	4	USP34
2.4e-27	0.635634	0.569	0.771	6.35e-23	4	RAP1GDS1
2.64e-27	0.800318	0.504	0.668	7e-23	4	CBL
4.1e-27	0.564074	0.245	0.4	1.09e-22	4	MAILR
4.42e-27	0.691947	0.571	0.78	1.17e-22	4	TMEM165
4.61e-27	0.868232	0.475	0.6	1.22e-22	4	TET2
5.54e-27	0.870343	0.451	0.545	1.47e-22	4	ZNF407
6.23e-27	0.9334	0.347	0.368	1.65e-22	4	APBB2
7.63e-27	0.83562	0.344	0.348	2.02e-22	4	IRAK3
8.81e-27	0.85202	0.509	0.677	2.33e-22	4	PHF21A
1.05e-26	0.679489	0.565	0.76	2.79e-22	4	RAB1A
1.23e-26	0.756725	0.323	0.323	3.27e-22	4	IL6R
4.14e-26	0.928628	0.408	0.48	1.1e-21	4	VAC14
9.93e-26	0.794547	0.268	0.251	2.63e-21	4	CHST15
1.2e-25	0.5121	0.29	0.484	3.19e-21	4	CTDSPL
1.55e-25	0.713872	0.549	0.747	4.1e-21	4	TTC17
1.59e-25	0.714715	0.555	0.766	4.21e-21	4	ELF2
5.46e-25	0.743841	0.536	0.712	1.45e-20	4	FBXL17
6.05e-25	0.852716	0.356	0.385	1.6e-20	4	ARHGEF11
6.32e-25	0.852095	0.407	0.471	1.67e-20	4	SH2B3
7.53e-25	0.76823	0.313	0.316	2e-20	4	CDC42BPB
1.7e-24	0.688828	0.535	0.73	4.51e-20	4	TAOK1
9.73e-24	0.747954	0.552	0.745	2.58e-19	4	CLIC4
1.01e-23	0.807431	0.419	0.482	2.68e-19	4	PDE4DIP
1.35e-23	0.980511	0.536	0.668	3.58e-19	4	ATP2B1
2.4e-23	0.824405	0.432	0.5	6.36e-19	4	NOTCH2
7.75e-23	0.790583	0.357	0.373	2.05e-18	4	RAB20
8.61e-23	0.503904	0.274	0.45	2.28e-18	4	SLC49A4
8.96e-23	0.517596	0.608	0.862	2.37e-18	4	PRPF4B
9.43e-23	0.761759	0.517	0.701	2.5e-18	4	LCOR
1.11e-22	0.864749	0.32	0.331	2.94e-18	4	PDGFC
1.55e-22	0.867583	0.438	0.542	4.1e-18	4	PIK3CB
1.55e-22	0.819893	0.489	0.653	4.11e-18	4	HTT
1.75e-22	0.91748	0.373	0.414	4.62e-18	4	MYO1D
4.13e-22	0.530899	0.371	0.603	1.09e-17	4	B4GALT1
4.64e-22	0.694877	0.527	0.717	1.23e-17	4	MAPK14
4.82e-22	0.905175	0.412	0.497	1.28e-17	4	TRERF1
5.07e-22	0.847077	0.407	0.482	1.34e-17	4	ULK4
5.18e-22	0.62805	0.575	0.797	1.37e-17	4	ITSN2
5.44e-22	0.503763	0.364	0.615	1.44e-17	4	NCOA7
7.87e-22	0.820741	0.488	0.638	2.08e-17	4	FER
8.21e-22	0.875271	0.463	0.601	2.18e-17	4	CDYL
1.8e-21	0.69096	0.537	0.741	4.76e-17	4	AGO3
2.14e-21	0.55366	0.328	0.542	5.67e-17	4	STX4
3.76e-21	0.748577	0.351	0.373	9.97e-17	4	TCIRG1
4.98e-21	0.88549	0.329	0.337	1.32e-16	4	TNIK
5.68e-21	0.782877	0.498	0.643	1.51e-16	4	ATP6V1A
1.16e-20	0.683547	0.487	0.579	3.07e-16	4	RHOQ
2.76e-20	0.73269	0.522	0.69	7.31e-16	4	ANKRD44
3.74e-20	0.754968	0.343	0.356	9.91e-16	4	GAS2L3
1.96e-19	0.509547	0.289	0.471	5.18e-15	4	WASL
2.19e-19	0.808409	0.466	0.607	5.81e-15	4	LINC03009
2.26e-19	0.768438	0.468	0.619	5.98e-15	4	POLR2J3
2.4e-19	0.752655	0.418	0.482	6.35e-15	4	SNX9
3.08e-19	0.840367	0.514	0.7	8.16e-15	4	HPCAL1
3.15e-19	0.781808	0.3	0.309	8.35e-15	4	OSBP2
3.34e-19	0.732622	0.53	0.738	8.85e-15	4	ABI1
8.33e-19	0.602667	0.432	0.471	2.21e-14	4	SIRPA
1.47e-18	0.89784	0.405	0.494	3.89e-14	4	RGS12
1.9e-18	0.514675	0.257	0.401	5.02e-14	4	TMTC2
2.78e-18	0.879675	0.342	0.384	7.37e-14	4	TEX2
6.35e-18	0.68534	0.538	0.749	1.68e-13	4	AAK1
8.96e-18	0.781157	0.384	0.435	2.37e-13	4	ADGRE2
1.1e-17	0.715705	0.268	0.264	2.92e-13	4	TLR1
1.51e-17	0.82201	0.472	0.626	4e-13	4	ATP11A
2.23e-17	0.508684	0.382	0.636	5.9e-13	4	TULP4
3.07e-17	0.517548	0.352	0.568	8.14e-13	4	MEGF9
5.05e-17	0.560443	0.325	0.533	1.34e-12	4	PHC2
5.34e-17	0.502134	0.269	0.428	1.42e-12	4	KLHL6
5.62e-17	0.747943	0.499	0.679	1.49e-12	4	RUFY3
6.14e-17	0.824442	0.393	0.425	1.63e-12	4	P2RX7
6.32e-17	0.714246	0.48	0.63	1.67e-12	4	UTY
6.7e-17	0.874228	0.447	0.569	1.78e-12	4	ABL2
1.73e-16	0.789253	0.342	0.382	4.59e-12	4	CAMSAP2
1.93e-16	0.530935	0.308	0.498	5.13e-12	4	DNAJC5
3.11e-16	0.50859	0.395	0.648	8.23e-12	4	TET3
4.67e-16	0.715806	0.296	0.301	1.24e-11	4	RAB7B
4.7e-16	0.530635	0.367	0.602	1.24e-11	4	MAP3K20
6.74e-16	0.660879	0.532	0.751	1.78e-11	4	MARK3
7.51e-16	0.506627	0.413	0.688	1.99e-11	4	SP3
9.49e-16	0.722345	0.506	0.67	2.51e-11	4	MYO5A
1.21e-15	0.508491	0.303	0.48	3.21e-11	4	SMURF1
1.62e-15	0.513295	0.344	0.551	4.29e-11	4	CNTLN
1.81e-15	0.537485	0.593	0.855	4.79e-11	4	TCF25
2.33e-15	0.786771	0.422	0.529	6.18e-11	4	PCCA
2.39e-15	0.66616	0.252	0.251	6.34e-11	4	ACSS2
2.41e-15	0.677874	0.257	0.257	6.39e-11	4	ZNF589
2.85e-15	0.517403	0.276	0.432	7.55e-11	4	TMEM164
3.65e-15	0.53595	0.382	0.633	9.66e-11	4	N4BP1
4.7e-15	0.525757	0.373	0.611	1.24e-10	4	USO1
4.77e-15	0.700715	0.524	0.715	1.26e-10	4	PLEKHM2
5.42e-15	0.836575	0.373	0.439	1.44e-10	4	SNX24
7.57e-15	0.758195	0.488	0.668	2.01e-10	4	LARP4B
8.99e-15	0.510012	0.34	0.546	2.38e-10	4	FAM222B
1.07e-14	0.601846	0.55	0.785	2.83e-10	4	ZFC3H1
1.5e-14	0.794166	0.319	0.35	3.98e-10	4	ATXN7L1
1.69e-14	0.523669	0.312	0.499	4.47e-10	4	MKNK1
1.73e-14	0.852848	0.336	0.383	4.59e-10	4	LINC02245
2.42e-14	0.834781	0.384	0.466	6.41e-10	4	TRAK1
2.68e-14	0.796403	0.327	0.356	7.09e-10	4	RAPH1
2.86e-14	0.523821	0.251	0.389	7.59e-10	4	SSH1
3.04e-14	0.517981	0.286	0.448	8.06e-10	4	PPM1B
3.37e-14	0.516516	0.384	0.625	8.94e-10	4	HIPK2
4.19e-14	0.64026	0.339	0.352	1.11e-09	4	SLAMF7
6.27e-14	0.801402	0.362	0.426	1.66e-09	4	SLC25A13
8e-14	0.702278	0.548	0.742	2.12e-09	4	LCP2
1.01e-13	0.515009	0.426	0.705	2.67e-09	4	CMIP
1.07e-13	0.527069	0.399	0.656	2.83e-09	4	MICU1
1.37e-13	0.504665	0.343	0.55	3.62e-09	4	RIC1
1.44e-13	0.524675	0.286	0.444	3.81e-09	4	SCARB1
1.57e-13	0.501065	0.355	0.56	4.16e-09	4	IGF1R
1.65e-13	0.67692	0.285	0.295	4.37e-09	4	ENTPD1-AS1
2.05e-13	0.804563	0.437	0.567	5.43e-09	4	CDK17
2.14e-13	0.625163	0.326	0.525	5.67e-09	4	PCYT1A
2.57e-13	0.513938	0.314	0.497	6.81e-09	4	CHM
2.62e-13	0.545836	0.376	0.613	6.93e-09	4	PLEKHA2
3.36e-13	0.566418	0.305	0.483	8.9e-09	4	TTL
3.4e-13	0.774556	0.471	0.641	9.01e-09	4	AFTPH
4.15e-13	0.766305	0.311	0.338	1.1e-08	4	CTBP2
5e-13	0.652516	0.507	0.699	1.32e-08	4	NF1
5e-13	0.531393	0.399	0.661	1.32e-08	4	STX8
1.1e-12	0.621195	0.542	0.781	2.91e-08	4	KCNAB2
1.29e-12	0.510245	0.354	0.566	3.42e-08	4	PPP3CC
1.47e-12	0.868978	0.318	0.351	3.88e-08	4	PAM
1.68e-12	0.792559	0.341	0.39	4.46e-08	4	AGPAT4
1.9e-12	0.691872	0.5	0.697	5.04e-08	4	MON2
1.99e-12	0.566944	0.289	0.448	5.26e-08	4	ABCC5
2.88e-12	0.506733	0.427	0.678	7.62e-08	4	STAT1
3.11e-12	0.783777	0.356	0.411	8.23e-08	4	SLC29A3
3.39e-12	0.523316	0.361	0.572	8.97e-08	4	SLC25A24
3.72e-12	0.547818	0.381	0.614	9.86e-08	4	P4HA1
4.8e-12	0.516841	0.56	0.792	1.27e-07	4	RBM6
5.25e-12	0.549431	0.303	0.473	1.39e-07	4	ST3GAL5
5.77e-12	0.503566	0.384	0.622	1.53e-07	4	ASXL2
7.28e-12	0.605836	0.302	0.47	1.93e-07	4	ZFX
7.29e-12	0.601641	0.541	0.769	1.93e-07	4	HERC1
8.4e-12	0.779159	0.434	0.561	2.23e-07	4	SFMBT2
9.53e-12	0.527759	0.375	0.598	2.52e-07	4	ABL1
9.91e-12	0.523405	0.334	0.528	2.63e-07	4	EYA3
1.01e-11	0.604464	0.541	0.775	2.68e-07	4	KDM2A
1.28e-11	0.518109	0.348	0.551	3.39e-07	4	ZZEF1
1.55e-11	0.51242	0.37	0.594	4.1e-07	4	LRCH3
2.71e-11	0.771401	0.334	0.383	7.17e-07	4	SPRED2
3.33e-11	0.52957	0.4	0.627	8.83e-07	4	DENND4A
5.02e-11	0.544882	0.334	0.524	1.33e-06	4	SEC24D
6.18e-11	0.851771	0.389	0.479	1.64e-06	4	PRKCE
6.42e-11	0.749425	0.439	0.571	1.7e-06	4	VWA8
6.54e-11	0.591259	0.253	0.248	1.73e-06	4	MGST1
6.76e-11	0.506997	0.36	0.566	1.79e-06	4	CDK19
7.14e-11	0.776555	0.357	0.415	1.89e-06	4	PER3
1.04e-10	0.522187	0.558	0.801	2.77e-06	4	SETD5
1.05e-10	0.547417	0.406	0.668	2.79e-06	4	FBXW11
1.09e-10	0.62507	0.517	0.707	2.9e-06	4	TRAPPC9
1.26e-10	0.506613	0.375	0.595	3.33e-06	4	PHC3
1.61e-10	0.815574	0.38	0.477	4.26e-06	4	PEX14
1.98e-10	0.551475	0.371	0.589	5.25e-06	4	FBXO34
2.6e-10	0.647141	0.267	0.28	6.9e-06	4	TUBB6
2.7e-10	0.910046	0.475	0.634	7.15e-06	4	RAPGEF2
3.02e-10	0.521129	0.387	0.623	7.99e-06	4	MAP2K4
3.49e-10	0.543385	0.296	0.449	9.26e-06	4	CLOCK
3.53e-10	0.529301	0.179	0.255	9.35e-06	4	PSTPIP2
4.05e-10	0.774905	0.355	0.427	1.07e-05	4	ZFYVE26
4.71e-10	0.781395	0.414	0.521	1.25e-05	4	BTBD9
4.77e-10	0.656686	0.53	0.74	1.26e-05	4	CIR1
5.05e-10	0.606851	0.548	0.739	1.34e-05	4	ARID5B
5.1e-10	0.810106	0.397	0.499	1.35e-05	4	CCDC18-AS1
5.17e-10	0.692366	0.51	0.718	1.37e-05	4	FAM172A
5.86e-10	0.580902	0.551	0.79	1.55e-05	4	RSRC1
5.91e-10	0.780415	0.456	0.615	1.56e-05	4	NCOA2
6.04e-10	0.518965	0.241	0.358	1.6e-05	4	PLEKHM3
7.25e-10	0.681363	0.505	0.712	1.92e-05	4	RPS6KA3
7.97e-10	0.710423	0.334	0.385	2.11e-05	4	VCL
9.49e-10	0.536163	0.283	0.423	2.51e-05	4	MCM9
9.72e-10	0.730931	0.296	0.325	2.58e-05	4	XYLT1
1.02e-09	0.529233	0.357	0.559	2.71e-05	4	ATXN7
2.1e-09	0.875576	0.441	0.582	5.57e-05	4	ARHGAP25
2.58e-09	0.550582	0.318	0.489	6.84e-05	4	FBXO42
2.93e-09	0.535977	0.323	0.491	7.77e-05	4	TOM1
3.45e-09	0.564339	0.265	0.392	9.13e-05	4	TOM1L2
4.09e-09	0.517221	0.356	0.549	0.000108338	4	CDK8
6.81e-09	0.587093	0.392	0.617	0.000180457	4	GNA13
7.06e-09	0.531731	0.377	0.585	0.000186953	4	ATRN
7.08e-09	0.741372	0.253	0.263	0.000187635	4	IRAK2
7.1e-09	0.799112	0.457	0.629	0.00018822	4	GALNT7
8.58e-09	0.501017	0.431	0.698	0.000227391	4	RABGAP1
8.66e-09	0.750247	0.327	0.385	0.000229546	4	DOT1L
9.24e-09	0.725026	0.49	0.695	0.000244928	4	NT5C2
1.1e-08	0.704835	0.491	0.688	0.000290468	4	DENND1A
1.14e-08	0.513442	0.398	0.622	0.000301771	4	ATF7IP
1.15e-08	0.688163	0.479	0.677	0.000304917	4	GPATCH2L
1.24e-08	0.589143	0.515	0.735	0.000328471	4	ATP11B
1.32e-08	0.606859	0.354	0.553	0.000350861	4	ACYP2
1.52e-08	0.685159	0.501	0.711	0.000402454	4	ITCH
1.66e-08	0.736015	0.315	0.364	0.000439059	4	KCTD7
1.66e-08	0.545684	0.326	0.499	0.000440749	4	BTRC
1.71e-08	0.571457	0.348	0.544	0.000452166	4	INO80D
2.64e-08	0.558149	0.372	0.581	0.000699034	4	DIP2B
2.93e-08	0.591414	0.292	0.441	0.00077544	4	SVIL-AS1
3.13e-08	0.598792	0.288	0.429	0.000829844	4	ZNF710
4.77e-08	0.544901	0.364	0.552	0.00126268	4	DLEU1
5.61e-08	0.710027	0.277	0.304	0.00148614	4	DNM3
7.52e-08	0.604346	0.541	0.763	0.00199163	4	CLTC
8.33e-08	0.585745	0.374	0.581	0.00220576	4	CPPED1
1.04e-07	0.749617	0.469	0.646	0.00276051	4	STK10
1.18e-07	0.745579	0.455	0.617	0.0031199	4	ACTN1
1.37e-07	0.61586	0.475	0.604	0.00362632	4	KIAA0930
1.52e-07	0.546442	0.41	0.652	0.00402409	4	VPS41
1.69e-07	0.78438	0.317	0.367	0.00447894	4	FRMD4A
1.72e-07	0.59331	0.374	0.582	0.00455207	4	RNPC3
1.79e-07	0.535968	0.409	0.649	0.00474187	4	RAB6A
2.14e-07	0.650639	0.262	0.284	0.00566069	4	SLC9A7
2.17e-07	0.770559	0.394	0.51	0.00574456	4	ZCCHC2
2.44e-07	0.537488	0.402	0.636	0.00645415	4	KIAA2026
3.01e-07	0.529682	0.43	0.692	0.00797543	4	KIAA0232
3.18e-07	0.729954	0.434	0.571	0.00842546	4	ATP6V0A1
4.88e-07	0.632788	0.504	0.7	0.0129321	4	ZNF609
6.17e-07	0.508794	0.271	0.391	0.0163348	4	PRKCD
7.22e-07	0.583241	0.304	0.444	0.0191303	4	RFTN1
8.49e-07	0.607629	0.33	0.501	0.0225046	4	GNA12
9.46e-07	0.734371	0.387	0.485	0.0250535	4	OSBPL1A
1.06e-06	0.726331	0.314	0.355	0.0281252	4	MARCHF1
1.18e-06	0.599882	0.38	0.598	0.0313378	4	BCL2L1
1.28e-06	0.707043	0.324	0.388	0.0339066	4	TMEM63A
1.37e-06	0.540869	0.374	0.575	0.036176	4	FAM120B
1.51e-06	0.592038	0.385	0.608	0.0399781	4	YTHDF3
1.66e-06	0.52639	0.423	0.67	0.0438848	4	CCSER2
1.83e-06	0.553486	0.357	0.542	0.0484977	4	FRS2

## Sheet: cluster 5
p_val	avg_log2FC	pct.1	pct.2	p_val_adj	cluster	gene
0	0.891901	0.855	0.356	0	5	CCL2
0	0.833752	0.807	0.304	0	5	CXCL8
0	0.7281	0.936	0.529	0	5	CCL3
0	0.718744	0.815	0.318	0	5	CCL3L3
0	0.717051	0.576	0.182	0	5	HS3ST2
0	0.659864	0.998	0.792	0	5	GPNMB
0	0.652589	0.871	0.497	0	5	CCL4
0	0.633164	0.975	0.652	0	5	IER3
0	0.62556	0.93	0.393	0	5	RNASE1
0	0.617246	0.78	0.347	0	5	CCL4L2
0	0.602287	0.987	0.486	0	5	MARCKS
0	0.576837	0.923	0.474	0	5	CFD
0	0.574905	0.999	0.782	0	5	LGALS3
0	0.572646	0.951	0.525	0	5	LGMN
0	0.559995	1	0.766	0	5	IFI30
0	0.559578	0.942	0.585	0	5	NAMPT
0	0.540277	0.997	0.566	0	5	CTSZ
0	0.525186	1	0.941	0	5	PSAP
0	0.520963	0.848	0.29	0	5	NUPR1
0	0.512166	0.828	0.324	0	5	PLAU
0	0.508226	0.802	0.289	0	5	CXCL2

## Sheet: cluster 6
p_val	avg_log2FC	pct.1	pct.2	p_val_adj	cluster	gene
0	1.26751	0.864	0.955	0	6	ENSG00000289901
1.31e-295	1.04191	0.812	0.942	3.46e-291	6	ENSG00000289474
8.94e-258	0.832886	0.938	0.968	2.37e-253	6	HSP90AA1
9.89e-255	0.946919	0.795	0.689	2.62e-250	6	SOX4
1.34e-238	0.65877	0.977	0.998	3.54e-234	6	MT-CYB
5.48e-234	0.798474	0.956	0.994	1.45e-229	6	MT-ATP6
1.38e-227	0.614223	0.983	0.999	3.65e-223	6	MT-CO3
7.21e-215	0.652496	0.976	0.998	1.91e-210	6	MT-ND4
1.06e-198	0.630581	0.989	0.999	2.81e-194	6	MT-CO2
6.36e-188	0.993446	0.642	0.565	1.69e-183	6	CASC15
2.22e-158	1.04377	0.707	0.762	5.87e-154	6	PRKCA
3.38e-139	0.617458	0.821	0.826	8.95e-135	6	CDK6
1.59e-133	0.913617	0.64	0.601	4.22e-129	6	MIR646HG
4.07e-124	1.05887	0.592	0.531	1.08e-119	6	CDH4
5.75e-119	1.0781	0.661	0.733	1.52e-114	6	DNAJB1
6.45e-114	0.699454	0.721	0.914	1.71e-109	6	MACF1
4e-104	0.620789	0.927	0.989	1.06e-99	6	MT-ND2
1.3e-95	0.850752	0.583	0.586	3.46e-91	6	SYNE2
8.89e-82	0.956842	0.543	0.527	2.35e-77	6	MKI67
5.34e-81	0.52923	0.818	0.964	1.42e-76	6	MT-ND4L
6.96e-79	1.03461	0.567	0.655	1.84e-74	6	HDAC4
1.37e-78	0.890384	0.501	0.501	3.64e-74	6	HELLS
5.78e-76	0.939129	0.532	0.495	1.53e-71	6	CCDC26
7.75e-62	0.817313	0.523	0.528	2.05e-57	6	TOX
2.04e-61	0.998367	0.613	0.747	5.41e-57	6	HSPH1
1.19e-59	0.562353	0.591	0.581	3.15e-55	6	LEF1
5.85e-57	0.533448	0.232	0.46	1.55e-52	6	MED29
2.08e-55	0.8974	0.578	0.695	5.51e-51	6	SSBP2
1.37e-53	0.666694	0.666	0.886	3.64e-49	6	TCF12
2.63e-52	0.768383	0.507	0.529	6.98e-48	6	IKZF2
4.78e-52	0.89202	0.517	0.585	1.27e-47	6	MSI2
4.63e-47	0.781031	0.475	0.489	1.23e-42	6	CLSPN
5.06e-46	0.698187	0.648	0.839	1.34e-41	6	RUNX1
1.7e-44	0.924568	0.498	0.508	4.52e-40	6	HSPA1B
1.43e-40	0.945138	0.397	0.401	3.8e-36	6	DIAPH3
2.81e-39	0.867145	0.438	0.477	7.46e-35	6	PARD3
3.05e-38	0.506616	0.254	0.463	8.08e-34	6	HEXIM1
3.09e-38	0.663197	0.627	0.811	8.19e-34	6	FAM133B
3.6e-35	0.505845	0.377	0.688	9.54e-31	6	ATP1A1
7.71e-34	0.552966	0.627	0.818	2.04e-29	6	PRKDC
2.1e-32	0.836677	0.458	0.527	5.56e-28	6	ATAD5
1.74e-31	0.731157	0.48	0.55	4.6e-27	6	ZEB1
7.53e-31	0.851591	0.502	0.601	1.99e-26	6	TMEM131L
1.29e-29	0.509741	0.666	0.872	3.42e-25	6	RB1
9.28e-29	0.712166	0.46	0.495	2.46e-24	6	MYO7B
2.65e-28	0.805661	0.578	0.776	7.01e-24	6	LDLRAD4
1.92e-27	0.819308	0.52	0.685	5.09e-23	6	NSD2
3.23e-27	0.841059	0.52	0.677	8.55e-23	6	GALNT2
6.62e-26	0.704239	0.562	0.804	1.76e-21	6	KANSL1
1.65e-25	0.577255	0.635	0.88	4.38e-21	6	GNAQ
1.27e-24	0.93171	0.541	0.768	3.36e-20	6	ANKRD36C
1.96e-24	0.689508	0.501	0.61	5.2e-20	6	EZH2
3.43e-24	0.506253	0.305	0.525	9.09e-20	6	NOM1
3.42e-23	0.781532	0.411	0.443	9.07e-19	6	ARPP21
1.51e-22	0.659284	0.478	0.556	4.01e-18	6	ATAD2
2.8e-22	0.757824	0.528	0.705	7.41e-18	6	PHF14
3.93e-22	0.582911	0.421	0.424	1.04e-17	6	RRM2
4.33e-22	0.84127	0.59	0.783	1.15e-17	6	WWOX
9.2e-22	0.57796	0.348	0.595	2.44e-17	6	NARF
1.05e-21	0.713735	0.44	0.486	2.79e-17	6	ENSG00000263551
3.34e-21	0.757749	0.501	0.622	8.86e-17	6	KLF12
8.61e-21	0.937936	0.493	0.672	2.28e-16	6	ANKRD36
1.13e-20	0.508984	0.298	0.502	2.98e-16	6	SLC25A25
2.45e-20	0.796062	0.389	0.432	6.5e-16	6	MED12L
3.39e-19	0.508434	0.304	0.507	8.97e-15	6	BRD8
4.56e-19	0.585712	0.312	0.524	1.21e-14	6	KDM4B
1.84e-18	0.597072	0.373	0.635	4.89e-14	6	TLE4
7.84e-18	0.735469	0.386	0.431	2.08e-13	6	BRIP1
1.99e-17	0.69706	0.572	0.813	5.26e-13	6	FAF1
4.45e-17	0.630043	0.272	0.435	1.18e-12	6	HMGCS1
1.91e-16	0.513828	0.283	0.454	5.05e-12	6	CRY1
1.05e-15	0.582407	0.337	0.556	2.79e-11	6	PPME1
2.65e-15	0.726244	0.426	0.449	7.02e-11	6	H1-5
1.12e-14	0.562976	0.397	0.665	2.96e-10	6	INTS6
1.18e-14	0.521974	0.342	0.563	3.11e-10	6	CEP295
2.12e-14	0.537691	0.369	0.62	5.61e-10	6	SUGP2
4.28e-14	0.66053	0.564	0.781	1.13e-09	6	SMYD3
8.5e-14	0.560879	0.469	0.538	2.25e-09	6	BCL11B
1.03e-13	0.514112	0.32	0.521	2.74e-09	6	MPRIP
1.45e-13	0.520753	0.322	0.518	3.84e-09	6	ACACA
2.56e-13	0.50302	0.337	0.55	6.79e-09	6	NAA16
3.4e-13	0.507136	0.333	0.535	9.01e-09	6	SUPT3H
3.5e-13	0.51457	0.327	0.526	9.28e-09	6	MDN1
5.86e-13	0.521087	0.48	0.725	1.55e-08	6	JUN
8.5e-13	1.00169	0.406	0.698	2.25e-08	6	PLCG2
1.09e-12	0.643782	0.458	0.503	2.88e-08	6	CENPF
1.99e-12	0.510892	0.33	0.535	5.28e-08	6	TCF20
2.88e-12	0.610578	0.424	0.47	7.62e-08	6	NUSAP1
5.33e-12	0.532091	0.386	0.646	1.41e-07	6	SMG6
6.73e-12	0.777228	0.446	0.579	1.78e-07	6	GMDS
1.37e-11	0.696911	0.428	0.528	3.63e-07	6	MMS22L
1.41e-11	0.850135	0.536	0.785	3.74e-07	6	SLC38A2
1.52e-11	0.631602	0.399	0.667	4.03e-07	6	AMD1
2.13e-11	0.56478	0.23	0.348	5.65e-07	6	LDLR
3.17e-11	0.534788	0.313	0.491	8.39e-07	6	TMEM135
2.29e-10	0.640892	0.536	0.767	6.06e-06	6	NEK7
2.32e-10	0.519679	0.265	0.401	6.14e-06	6	GCH1
6.24e-10	0.576073	0.215	0.323	1.65e-05	6	UAP1
1.37e-09	0.610153	0.4	0.466	3.64e-05	6	FANCI
2.21e-09	0.731348	0.382	0.47	5.86e-05	6	NCAPG2
2.39e-09	0.532284	0.369	0.597	6.32e-05	6	CEP192
4.8e-09	0.644193	0.249	0.37	0.00012713	6	H2AC6
1.05e-08	0.66066	0.558	0.799	0.000279034	6	VAV3
1.08e-08	0.523561	0.24	0.355	0.000286309	6	CNNM2
2.28e-08	0.59188	0.379	0.438	0.000602778	6	KNL1
3.04e-08	0.669636	0.296	0.298	0.000806577	6	HSPA6
4.43e-08	0.715488	0.345	0.389	0.0011746	6	MIR924HG
9.54e-08	0.532331	0.586	0.847	0.0025277	6	GRK3
9.85e-08	0.775288	0.367	0.451	0.00260855	6	CCDC171
2.47e-07	0.542772	0.348	0.543	0.00654625	6	UHRF2
2.82e-07	0.73995	0.356	0.428	0.00747704	6	EXT1
3.77e-07	0.56015	0.354	0.549	0.00998858	6	CSPP1
5.56e-07	0.507562	0.252	0.365	0.0147309	6	SLC12A2
6.8e-07	0.620205	0.338	0.512	0.0180132	6	USPL1
8.97e-07	0.506436	0.26	0.379	0.02376	6	TET1
1.55e-06	0.735849	0.434	0.564	0.0409355	6	CENPP

## Sheet: cluster 7
p_val	avg_log2FC	pct.1	pct.2	p_val_adj	cluster	gene
0	4.39023	0.905	0.139	0	7	IL7R
0	3.48067	0.433	0.059	0	7	CCL5
0	3.07618	0.864	0.205	0	7	LTB
0	2.49916	0.502	0.019	0	7	KLRB1
0	2.3883	0.864	0.326	0	7	TRAC
0	2.24993	0.924	0.517	0	7	IL32
0	2.19508	0.955	0.483	0	7	TXNIP
0	2.1899	0.823	0.495	0	7	TRBC2
0	2.09737	0.695	0.03	0	7	TC2N
0	2.02458	0.596	0.029	0	7	ANK3
0	1.91173	0.852	0.483	0	7	IFITM1
0	1.86954	0.788	0.513	0	7	GIMAP7
0	1.8531	0.687	0.28	0	7	RORA
0	1.84086	0.548	0.228	0	7	CD69
0	1.82954	0.551	0.026	0	7	INPP4B
0	1.81818	0.784	0.405	0	7	CD96
2.17e-56	1.75712	0.307	0.212	5.76e-52	7	GZMA
0	1.72522	0.549	0.023	0	7	LINC00861
0	1.68269	0.85	0.721	0	7	ZFP36L2
1.24e-53	1.67354	0.195	0.4	3.3e-49	7	CCL4L2
0	1.65423	0.563	0.158	0	7	STAT4
1.29e-145	1.65178	0.295	0.125	3.42e-141	7	CST7
0	1.63583	0.437	0.011	0	7	NELL2
0	1.61611	0.814	0.473	0	7	RIPOR2
0	1.58475	0.77	0.453	0	7	CD2
0	1.57869	0.994	0.932	0	7	RPS27A
0	1.57205	0.996	0.952	0	7	RPL13A
0	1.54145	0.981	0.861	0	7	CALM1
0	1.53055	0.996	0.953	0	7	RPLP2
0	1.51424	0.896	0.796	0	7	SARAF
0	1.51389	0.536	0.064	0	7	SPOCK2
1.55e-306	1.49984	0.646	0.418	4.1e-302	7	KLF2
2.29e-269	1.48921	0.395	0.147	6.07e-265	7	PYHIN1
0	1.48447	0.767	0.452	0	7	SKAP1
0	1.47956	0.806	0.685	0	7	STK17B
0	1.47154	0.279	0.027	0	7	ENSG00000227240
5.76e-32	1.4415	0.369	0.543	1.53e-27	7	CCL4
0	1.44046	0.466	0.015	0	7	GPR171
4.61e-289	1.43685	0.723	0.605	1.22e-284	7	FYN
0	1.43668	0.714	0.52	0	7	CLEC2D
0	1.40303	0.995	0.925	0	7	RPL30
0	1.38625	0.984	0.904	0	7	RPS29
0	1.36199	0.757	0.699	0	7	GSTK1
0	1.35126	0.996	0.935	0	7	RPS26
0	1.32653	0.997	0.957	0	7	RPS12
0	1.30466	0.367	0.027	0	7	SAMD3
0	1.29867	0.958	0.787	0	7	PNRC1
0	1.29211	0.701	0.518	0	7	TRAF3IP3
0	1.29043	0.995	0.929	0	7	RPS27
5.04e-236	1.28766	0.639	0.514	1.34e-231	7	PDCD4
0	1.28581	0.995	0.935	0	7	RPS3
3.43e-289	1.2797	0.742	0.641	9.08e-285	7	EML4
3.76e-213	1.27618	0.617	0.491	9.97e-209	7	TTC39C
0	1.27236	0.995	0.925	0	7	RPS15A
0	1.27202	0.999	0.977	0	7	EEF1A1
0	1.2713	0.908	0.831	0	7	JAK1
0	1.26227	0.892	0.783	0	7	TOMM7
7.12e-210	1.26031	0.579	0.429	1.89e-205	7	CDKN1B
4.77e-273	1.25873	0.514	0.26	1.26e-268	7	LBH
0	1.25726	0.997	0.935	0	7	RPS14
0	1.25324	0.998	0.96	0	7	RPL13
0	1.24469	0.993	0.926	0	7	RPL14
4.63e-281	1.2435	0.47	0.209	1.23e-276	7	SORL1
0	1.24023	0.386	0.022	0	7	SLFN12L
0	1.23942	0.995	0.927	0	7	RPL21
0	1.23511	0.517	0.223	0	7	CCND2
0	1.2327	0.967	0.787	0	7	HLA-E
0	1.2301	0.991	0.906	0	7	RPL3
0	1.21492	0.994	0.919	0	7	RPS25
0	1.20945	0.999	0.987	0	7	B2M
0	1.19482	0.994	0.933	0	7	RPL34
9.12e-187	1.19061	0.541	0.387	2.42e-182	7	PBXIP1
0	1.18307	0.957	0.835	0	7	MYL12A
1.04e-171	1.17152	0.448	0.262	2.74e-167	7	AQP3
0	1.171	0.942	0.912	0	7	ARHGAP15
0	1.16791	0.33	0.021	0	7	TAFA1
5.91e-217	1.16203	0.491	0.274	1.56e-212	7	ITK
0	1.16083	0.994	0.921	0	7	RPL39
1.66e-242	1.15169	0.689	0.5	4.39e-238	7	CD247
0	1.14819	0.784	0.68	0	7	IL2RG
0	1.14234	0.425	0.144	0	7	PCED1B
0	1.14161	0.999	0.97	0	7	TPT1
0	1.13724	0.992	0.915	0	7	RPL35A
3.91e-129	1.13366	0.563	0.53	1.04e-124	7	LEPROTL1
1.17e-63	1.1324	0.449	0.408	3.09e-59	7	SYNE1
0	1.11838	0.998	0.968	0	7	RPS8
1.5e-272	1.11454	0.766	0.734	3.98e-268	7	CDC42SE2
2.13e-293	1.10959	0.452	0.183	5.65e-289	7	CYTIP
0	1.09095	0.995	0.915	0	7	HLA-B
3.31e-251	1.08888	0.711	0.595	8.77e-247	7	LIMD2
5e-147	1.0806	0.601	0.541	1.32e-142	7	GIMAP4
0	1.08022	0.997	0.956	0	7	RPL10
2.44e-276	1.07793	0.752	0.521	6.47e-272	7	BCL11B
0	1.0752	0.996	0.952	0	7	RPL11
0	1.07436	0.994	0.936	0	7	RPS23
0	1.07289	0.995	0.943	0	7	RPL32
0	1.07264	0.992	0.914	0	7	RPL23A
7.09e-215	1.06827	0.707	0.687	1.88e-210	7	EPB41
2.88e-106	1.065	0.505	0.432	7.63e-102	7	GPR65
2.59e-217	1.05847	0.401	0.169	6.87e-213	7	IKZF3
3.22e-90	1.05604	0.487	0.433	8.52e-86	7	RCAN3
0	1.0543	0.985	0.822	0	7	S100A4
1.91e-177	1.05221	0.506	0.329	5.06e-173	7	YPEL3
2.18e-116	1.0505	0.558	0.529	5.79e-112	7	RBL2
0	1.04665	0.994	0.919	0	7	RPL18
0	1.04371	0.994	0.946	0	7	PTPRC
3.87e-165	1.03931	0.632	0.559	1.03e-160	7	SLFN5
3.15e-264	1.0375	0.406	0.152	8.34e-260	7	SP140
0	1.01296	0.342	0.034	0	7	P2RY10
3.67e-164	1.00852	0.418	0.228	9.72e-160	7	ISG20
0	0.996821	0.346	0.09	0	7	PCED1B-AS1
7.46e-187	0.993296	0.529	0.327	1.98e-182	7	TNIK
1.32e-248	0.991956	0.764	0.775	3.5e-244	7	STK4
4.36e-157	0.985897	0.373	0.184	1.16e-152	7	SYTL3
0	0.980245	0.975	0.864	0	7	HLA-C
0	0.978621	0.997	0.969	0	7	RPLP1
0	0.976789	0.993	0.917	0	7	RPL27A
0	0.976689	0.983	0.906	0	7	RPL38
0	0.970574	0.993	0.949	0	7	RPS18
7.81e-240	0.968773	0.834	0.784	2.07e-235	7	BTG1
4.43e-280	0.968044	0.851	0.85	1.17e-275	7	ANKRD12
0	0.967681	0.997	0.962	0	7	RPL41
0	0.967027	0.994	0.917	0	7	RPS10
0	0.966647	0.927	0.84	0	7	RPL36AL
7.89e-260	0.962362	0.316	0.092	2.09e-255	7	CCR7
5.31e-279	0.959621	0.843	0.758	1.41e-274	7	CD48
4.52e-57	0.949966	0.305	0.208	1.2e-52	7	FAAH2
3.6e-95	0.944617	0.509	0.465	9.55e-91	7	SUN2
2.4e-113	0.941452	0.593	0.603	6.35e-109	7	EMB
7.14e-198	0.940752	0.785	0.577	1.89e-193	7	SYNE2
4.11e-134	0.940341	0.343	0.173	1.09e-129	7	DUSP16
1.22e-131	0.932876	0.676	0.672	3.24e-127	7	ZBTB20
5.22e-157	0.932329	0.395	0.209	1.38e-152	7	TUBA4A
1.6e-281	0.930409	0.777	0.529	4.24e-277	7	DOCK8
1.35e-95	0.927889	0.559	0.507	3.58e-91	7	P2RY8
0	0.926752	0.992	0.923	0	7	RPS13
7.62e-92	0.925369	0.557	0.567	2.02e-87	7	BIN2
0	0.924677	0.293	0.01	0	7	SCML4
0	0.924507	0.987	0.912	0	7	RPL9
8.12e-93	0.924373	0.633	0.669	2.15e-88	7	IFITM2
0	0.920683	0.992	0.922	0	7	RPL5
0	0.918659	0.991	0.926	0	7	RPL12
1.61e-104	0.917362	0.389	0.253	4.28e-100	7	CD6
7.11e-67	0.915856	0.388	0.294	1.88e-62	7	GBP2
0	0.915651	0.988	0.912	0	7	RPS21
2.46e-96	0.915157	0.55	0.505	6.52e-92	7	OPTN
1.8e-113	0.908161	0.629	0.628	4.77e-109	7	STK17A
2.11e-90	0.905454	0.476	0.396	5.6e-86	7	ENSG00000291143
0	0.902885	0.989	0.917	0	7	RPS16
1.16e-175	0.90238	0.643	0.512	3.07e-171	7	SLC38A1
2.74e-265	0.902172	0.818	0.807	7.26e-261	7	SRSF5
1.09e-137	0.899785	0.668	0.673	2.89e-133	7	ANKRD44
6.29e-168	0.896377	0.726	0.768	1.67e-163	7	ATM
3.29e-58	0.895487	0.493	0.464	8.72e-54	7	TIMP1
0	0.894541	0.979	0.901	0	7	RPL36A
1.82e-75	0.893712	0.39	0.294	4.82e-71	7	PRKCQ-AS1
1.54e-78	0.893592	0.418	0.328	4.09e-74	7	CCDC69
2.99e-145	0.891572	0.682	0.659	7.93e-141	7	CRIP1
2.5e-214	0.891515	0.747	0.556	6.62e-210	7	ETS1
4.77e-112	0.890599	0.775	0.808	1.26e-107	7	PDE3B
4.74e-89	0.889265	0.359	0.235	1.26e-84	7	CD5
6.35e-98	0.889179	0.294	0.154	1.68e-93	7	KLRG1
1.19e-152	0.880606	0.656	0.511	3.14e-148	7	CAMK4
4.44e-104	0.880429	0.355	0.21	1.18e-99	7	PLAC8
5.59e-65	0.879885	0.519	0.546	1.48e-60	7	CYLD
2.08e-93	0.877508	0.292	0.155	5.52e-89	7	TCP10L
0	0.875227	0.973	0.898	0	7	RPL22
1.22e-241	0.870327	0.323	0.104	3.22e-237	7	THEM4
0	0.866732	0.991	0.918	0	7	RPS28
0	0.857563	0.989	0.913	0	7	RPS4X
0	0.857228	0.286	0.032	0	7	PATJ
0	0.855961	0.975	0.826	0	7	CD52
2.83e-69	0.850965	0.439	0.377	7.51e-65	7	DGKA
2.71e-49	0.850461	0.412	0.377	7.19e-45	7	OXNAD1
0	0.849381	0.997	0.948	0	7	RPL19
4.14e-123	0.848051	0.609	0.539	1.1e-118	7	HLA-F
8.96e-43	0.844327	0.521	0.571	2.37e-38	7	PHACTR2
9.54e-45	0.843757	0.47	0.513	2.53e-40	7	CLDND1
4.27e-84	0.837826	0.34	0.218	1.13e-79	7	FKBP11
1.52e-70	0.836651	0.429	0.347	4.02e-66	7	CARD11
2.5e-180	0.833854	0.721	0.533	6.61e-176	7	CD3E
1.97e-77	0.827001	0.367	0.253	5.23e-73	7	PPP1R16B
0	0.82642	0.994	0.939	0	7	RPS3A
1.2e-276	0.825168	0.905	0.855	3.17e-272	7	EEF1D
0	0.823404	0.979	0.896	0	7	RPL10A
4.58e-76	0.819661	0.355	0.245	1.21e-71	7	IL16
0	0.818919	0.99	0.925	0	7	RPL31
1.4e-229	0.81813	0.878	0.873	3.71e-225	7	FYB1
1.99e-124	0.817946	0.764	0.699	5.27e-120	7	H1-3
1.04e-119	0.815665	0.331	0.171	2.77e-115	7	S1PR1
9.09e-175	0.813383	0.257	0.084	2.41e-170	7	GZMM
0	0.813093	0.994	0.939	0	7	RPL37
2.01e-104	0.812811	0.625	0.691	5.31e-100	7	PPP2R5C
1.19e-110	0.806208	0.313	0.161	3.15e-106	7	TES
3.01e-120	0.806183	0.699	0.733	7.97e-116	7	RESF1
1.57e-58	0.805514	0.345	0.257	4.15e-54	7	TRAT1
4.07e-209	0.805012	0.845	0.793	1.08e-204	7	TLE5
4.22e-138	0.804517	0.277	0.113	1.12e-133	7	NR3C2
9.11e-96	0.802469	0.556	0.468	2.41e-91	7	RHOH
2.7e-58	0.799876	0.384	0.307	7.15e-54	7	NLRP1
4.33e-39	0.797008	0.408	0.393	1.15e-34	7	KLF3
2.01e-30	0.796404	0.508	0.592	5.31e-26	7	GNG2
3.18e-130	0.793592	0.721	0.756	8.43e-126	7	GAS5
2.98e-57	0.792754	0.413	0.349	7.91e-53	7	FCMR
4.45e-46	0.79095	0.433	0.409	1.18e-41	7	CDC14A
0	0.788518	0.992	0.919	0	7	RPL17
2.23e-290	0.78224	0.99	0.899	5.9e-286	7	HLA-A
1.34e-40	0.78208	0.416	0.396	3.55e-36	7	ATP8A1
2.49e-44	0.782054	0.312	0.237	6.59e-40	7	TSPOAP1-AS1
0	0.778608	0.996	0.924	0	7	RPL26
0	0.77803	0.96	0.887	0	7	RPL4
2.32e-133	0.777693	0.69	0.727	6.15e-129	7	FAM107B
0	0.777023	0.995	0.948	0	7	RPL28
0	0.775885	0.981	0.909	0	7	RPL36
1.33e-166	0.768365	0.818	0.854	3.51e-162	7	SMCHD1
2.16e-93	0.763907	0.625	0.636	5.72e-89	7	PDE7A
7.59e-290	0.761232	0.978	0.891	2.01e-285	7	RPSA
2.14e-30	0.761066	0.461	0.514	5.66e-26	7	CD55
1.13e-77	0.760139	0.456	0.34	3.01e-73	7	GPR183
3.34e-146	0.756705	0.405	0.207	8.86e-142	7	TRAF1
0	0.754521	0.99	0.917	0	7	FAU
3.94e-65	0.753465	0.619	0.739	1.04e-60	7	GCC2
0	0.751892	0.988	0.929	0	7	RPL8
5.4e-253	0.750822	0.961	0.888	1.43e-248	7	EEF1B2
3.69e-74	0.750767	0.615	0.7	9.77e-70	7	RASA2
0	0.749222	0.991	0.93	0	7	RPS20
1.09e-67	0.746286	0.473	0.409	2.89e-63	7	PRKCQ
7.1e-106	0.745087	0.648	0.735	1.88e-101	7	SF1
0	0.740737	0.988	0.9	0	7	RPL7
6.27e-23	0.738941	0.465	0.493	1.66e-18	7	SELL
6.65e-58	0.738196	0.507	0.451	1.76e-53	7	BACH2
1.66e-46	0.735337	0.304	0.224	4.41e-42	7	PIK3IP1
1.05e-51	0.733526	0.344	0.256	2.78e-47	7	MAL
4.58e-28	0.73205	0.421	0.443	1.21e-23	7	RASA3
2.02e-66	0.727073	0.518	0.453	5.35e-62	7	EVI2A
0	0.725795	0.991	0.927	0	7	RPL7A
7.59e-43	0.720643	0.419	0.392	2.01e-38	7	CD28
1.19e-44	0.712603	0.648	0.805	3.16e-40	7	ITGB1
1.12e-113	0.712447	0.731	0.734	2.97e-109	7	PSIP1
3.17e-74	0.712374	0.609	0.721	8.39e-70	7	DAZAP2
1.27e-90	0.712132	0.655	0.747	3.36e-86	7	WIPF1
1.38e-10	0.711814	0.41	0.506	3.65e-06	7	PTPN22
1.04e-143	0.708107	0.782	0.81	2.75e-139	7	IKZF1
1.28e-16	0.697446	0.411	0.48	3.39e-12	7	ODF2L
5.65e-302	0.696618	0.995	0.944	1.5e-297	7	RPS6
4.45e-73	0.69644	0.646	0.771	1.18e-68	7	MPHOSPH8
4.88e-37	0.695221	0.555	0.67	1.29e-32	7	PARP8
2.14e-77	0.695205	0.604	0.696	5.67e-73	7	GPSM3
2.55e-151	0.687794	0.826	0.829	6.76e-147	7	NOP53
2.91e-25	0.685497	0.482	0.56	7.71e-21	7	CASK
2.26e-20	0.68539	0.453	0.564	5.99e-16	7	VAMP2
1.09e-83	0.684952	0.258	0.13	2.89e-79	7	SERPINB9
9.97e-23	0.682928	0.383	0.401	2.64e-18	7	GIMAP5
2.82e-147	0.68093	0.826	0.779	7.47e-143	7	RPS4Y1
1.42e-44	0.679977	0.564	0.671	3.76e-40	7	RAPGEF6
1.81e-166	0.677414	0.831	0.865	4.79e-162	7	ARGLU1
7.5e-51	0.675048	0.512	0.476	1.99e-46	7	GLIPR1
3.53e-59	0.672992	0.659	0.778	9.34e-55	7	FOXP1
5.04e-59	0.671389	0.582	0.702	1.34e-54	7	ORMDL1
5.91e-24	0.667885	0.433	0.47	1.57e-19	7	MIR142HG
7.95e-95	0.666809	0.72	0.727	2.11e-90	7	ARL4C
1.03e-27	0.661605	0.502	0.604	2.73e-23	7	ATF7IP
5.52e-23	0.660485	0.499	0.608	1.46e-18	7	SOS1
4.85e-09	0.659839	0.373	0.456	0.000128476	7	SVIP
8.38e-283	0.659564	0.979	0.898	2.22e-278	7	RPL27
1.72e-61	0.657602	0.609	0.722	4.56e-57	7	EPC1
3.11e-279	0.657288	0.992	0.912	8.24e-275	7	RPL24
2.78e-15	0.655005	0.324	0.332	7.35e-11	7	PLAAT4
3.42e-28	0.653014	0.385	0.37	9.06e-24	7	GRAP2
1.09e-23	0.652187	0.337	0.309	2.88e-19	7	SATB1-AS1
8.75e-52	0.651655	0.351	0.255	2.32e-47	7	PDE4B
1.86e-138	0.651595	0.867	0.827	4.92e-134	7	LDHB
2.95e-21	0.650317	0.375	0.392	7.81e-17	7	DDX3Y
2.72e-195	0.646794	0.915	0.932	7.22e-191	7	MBNL1
8.3e-26	0.644039	0.452	0.497	2.2e-21	7	AKT3
1.59e-13	0.642445	0.351	0.39	4.22e-09	7	GIMAP1
2.23e-84	0.641186	0.678	0.746	5.9e-80	7	KIF2A
7.22e-42	0.641084	0.598	0.64	1.91e-37	7	PRKCH
1.09e-09	0.63475	0.38	0.462	2.89e-05	7	BTN3A2
8.68e-34	0.633757	0.527	0.64	2.3e-29	7	STK38
1.04e-16	0.63229	0.451	0.568	2.77e-12	7	CCDC85B
9.93e-96	0.629546	0.753	0.784	2.63e-91	7	ARL6IP5
4.59e-74	0.62859	0.662	0.766	1.22e-69	7	EZR
1.39e-32	0.627399	0.511	0.592	3.69e-28	7	SP140L
2.93e-30	0.626099	0.591	0.75	7.77e-26	7	PIK3R1
4.54e-118	0.625563	0.765	0.824	1.2e-113	7	EIF4B
1.27e-49	0.623405	0.583	0.695	3.38e-45	7	SYNRG
1.13e-15	0.620588	0.337	0.354	3e-11	7	ICAM2
2.65e-57	0.617663	0.616	0.732	7.01e-53	7	AAK1
2e-34	0.616946	0.255	0.184	5.29e-30	7	JAK3
2.86e-09	0.616667	0.416	0.532	7.57e-05	7	CFAP97
2.37e-255	0.61626	0.991	0.92	6.29e-251	7	RPL29
2.15e-38	0.612931	0.569	0.696	5.71e-34	7	RPS6KA3
4.56e-78	0.612123	0.7	0.793	1.21e-73	7	TNFAIP8
3.5e-26	0.61187	0.336	0.3	9.26e-22	7	FOXO1
2.09e-72	0.611104	0.708	0.762	5.55e-68	7	H1-4
2.94e-10	0.60878	0.421	0.524	7.78e-06	7	SMARCA2
2.59e-82	0.608087	0.702	0.78	6.87e-78	7	SNHG6
1.43e-90	0.60355	0.709	0.802	3.8e-86	7	SEC62
8.12e-08	0.601232	0.377	0.469	0.00215083	7	TMX4
5.52e-13	0.597511	0.272	0.261	1.46e-08	7	ELK3
1.71e-18	0.595876	0.338	0.337	4.52e-14	7	CAPN2
1.93e-07	0.59569	0.437	0.574	0.00512018	7	XBP1
1.84e-22	0.595666	0.513	0.651	4.87e-18	7	CCSER2
9.06e-37	0.595096	0.575	0.73	2.4e-32	7	YTHDC1
5.6e-273	0.593494	0.994	0.927	1.48e-268	7	RPS11
8.69e-229	0.592114	0.978	0.899	2.3e-224	7	NACA
3.2e-20	0.591855	0.529	0.696	8.47e-16	7	PRMT2
1.18e-269	0.588172	0.998	0.947	3.12e-265	7	RPS24
5.47e-12	0.58681	0.461	0.612	1.45e-07	7	MCUB
2.21e-07	0.585153	0.347	0.411	0.0058426	7	FGD3
0	0.584539	0.999	1	0	7	MALAT1
3.67e-60	0.584474	0.572	0.515	9.73e-56	7	EVI2B
1.94e-44	0.584309	0.611	0.595	5.15e-40	7	BTG2
1.02e-125	0.584084	0.853	0.757	2.7e-121	7	FXYD5
1.85e-232	0.583202	0.991	0.932	4.89e-228	7	RPL18A
6.65e-48	0.575379	0.522	0.457	1.76e-43	7	THEMIS
2.62e-20	0.574937	0.262	0.224	6.95e-16	7	FLT3LG
1.29e-08	0.57401	0.288	0.303	0.000342408	7	RNF125
1.26e-75	0.571859	0.693	0.783	3.34e-71	7	SSR2
6.27e-81	0.571512	0.709	0.801	1.66e-76	7	TNRC6B
3.87e-12	0.570008	0.317	0.33	1.02e-07	7	PVRIG
2.56e-37	0.569391	0.641	0.624	6.79e-33	7	SRGN
2.58e-08	0.558795	0.339	0.385	0.000684211	7	TOB1
1.88e-217	0.558414	0.992	0.929	4.97e-213	7	RPL6
3.24e-216	0.556577	0.995	0.953	8.59e-212	7	RPS19
2.62e-62	0.556175	0.683	0.783	6.94e-58	7	COMMD6
9.3e-89	0.553196	0.839	0.872	2.46e-84	7	SEPTIN7
6.86e-171	0.545811	0.969	0.939	1.82e-166	7	PABPC1
3.31e-11	0.542497	0.252	0.237	8.76e-07	7	NFATC2
4.53e-46	0.542484	0.605	0.754	1.2e-41	7	G3BP2
2.81e-226	0.542447	0.992	0.948	7.44e-222	7	RPS15
5.09e-45	0.541696	0.533	0.472	1.35e-40	7	ITM2A
3.53e-206	0.541239	0.985	0.91	9.34e-202	7	UBA52
5.01e-119	0.539866	0.876	0.865	1.33e-114	7	HSP90B1
3.04e-60	0.537255	0.673	0.805	8.06e-56	7	TMEM123
3.37e-09	0.537243	0.287	0.301	8.92e-05	7	DYNLT3
1.36e-13	0.537069	0.499	0.65	3.59e-09	7	TGFBR2
1.72e-14	0.536872	0.251	0.224	4.55e-10	7	HELB
1.93e-90	0.529471	0.758	0.865	5.11e-86	7	RNF213
6.16e-146	0.527632	0.936	0.931	1.63e-141	7	DDX5
2.36e-20	0.526631	0.513	0.667	6.25e-16	7	KRT10
8.53e-15	0.52583	0.173	0.288	2.26e-10	7	TNF
4.19e-07	0.525396	0.269	0.285	0.0111003	7	BIN1
4.62e-38	0.52473	0.544	0.582	1.22e-33	7	ACAP1
1.54e-11	0.524319	0.552	0.747	4.08e-07	7	NR3C1
4.1e-19	0.523954	0.527	0.662	1.09e-14	7	PACS1
5.67e-75	0.523833	0.741	0.835	1.5e-70	7	DDX24
4.16e-79	0.523315	0.808	0.709	1.1e-74	7	CAST
3.03e-17	0.522953	0.484	0.581	8.04e-13	7	PAG1
1.93e-12	0.51886	0.292	0.286	5.1e-08	7	DOCK9
2.65e-209	0.518052	0.994	0.959	7.01e-205	7	RPS2
3.03e-33	0.516211	0.614	0.782	8.02e-29	7	PHF3
4.68e-52	0.51619	0.705	0.749	1.24e-47	7	ANXA1
3.83e-07	0.516137	0.372	0.439	0.0101424	7	HIVEP2
2.48e-39	0.512495	0.591	0.724	6.57e-35	7	SLC35F1
2.55e-61	0.511764	0.677	0.802	6.76e-57	7	PIP4K2A
1.62e-10	0.509717	0.286	0.286	4.28e-06	7	GOLGA8B
2.15e-11	0.509509	0.495	0.69	5.69e-07	7	SRPRA
9.43e-15	0.508194	0.512	0.683	2.5e-10	7	PPP1R2
6.66e-16	0.506506	0.466	0.553	1.76e-11	7	CNN2
1.44e-111	0.505818	0.826	0.884	3.83e-107	7	DDX17
4.26e-16	0.505268	0.534	0.731	1.13e-11	7	MIER1
7.38e-64	0.503068	0.726	0.858	1.95e-59	7	KMT2E
4.72e-153	0.502752	0.979	0.924	1.25e-148	7	RPLP0
1.69e-51	0.501928	0.666	0.779	4.49e-47	7	RAP1A

## Sheet: cluster 8
p_val	avg_log2FC	pct.1	pct.2	p_val_adj	cluster	gene
0	5.8897	0.603	0.033	0	8	IGKC
0	5.24264	0.947	0.017	0	8	IGHM
0	4.3812	0.962	0.019	0	8	MS4A1
0	4.35824	0.451	0.009	0	8	IGLC2
0	4.08238	0.417	0.006	0	8	IGLC3
0	3.80832	0.951	0.021	0	8	BANK1
0	3.31032	0.945	0.322	0	8	CD79A
0	3.16132	0.821	0.004	0	8	IGHD
0	2.73295	0.825	0.017	0	8	CD79B
0	2.71509	0.828	0.222	0	8	LTB
0	2.56002	0.927	0.332	0	8	HLA-DQA1
0	2.52817	0.736	0.232	0	8	CD69
0	2.47892	0.989	0.664	0	8	CD74
0	2.47101	0.704	0.014	0	8	SPIB
0	2.46036	0.882	0.379	0	8	MEF2C
0	2.45773	0.871	0.313	0	8	RALGPS2
0	2.38506	0.836	0.428	0	8	BIRC3
0	2.33685	0.965	0.783	0	8	BTG1
0	2.33049	0.669	0.09	0	8	CCR7
0	2.23955	0.622	0.005	0	8	COL19A1
2.48e-222	2.21064	0.776	0.447	6.56e-218	8	BACH2
0	2.19321	0.885	0.441	0	8	AFF3
0	2.12467	0.477	0.002	0	8	TCL1A
0	2.11584	0.974	0.544	0	8	HLA-DRA
4.77e-191	2.09611	0.868	0.706	1.26e-186	8	CD83
0	2.07332	0.773	0.167	0	8	IKZF3
0	2.06854	0.664	0.006	0	8	PAX5
0	2.05195	0.68	0.034	0	8	LINC00926
0	2.01101	0.959	0.546	0	8	CD37
0	2.00019	0.876	0.576	0	8	SWAP70
8.46e-270	1.98766	0.823	0.523	2.24e-265	8	CLEC2D
1.92e-112	1.9659	0.494	0.246	5.08e-108	8	MIR155HG
0	1.94518	0.666	0.067	0	8	NIBAN3
0	1.932	0.973	0.565	0	8	HLA-DRB1
0	1.91	0.579	0.013	0	8	ENSG00000289963
0	1.87851	0.785	0.343	0	8	FCMR
0	1.87239	0.934	0.481	0	8	HLA-DPA1
0	1.86743	0.643	0.188	0	8	CD40
0	1.85713	0.299	0.004	0	8	JCHAIN
0	1.80551	0.926	0.457	0	8	HLA-DPB1
0	1.80117	0.573	0.003	0	8	FCRL1
4.86e-255	1.75309	0.833	0.481	1.29e-250	8	RIPOR2
0	1.72281	0.564	0.014	0	8	LINC02397
2.79e-151	1.72161	0.731	0.577	7.38e-147	8	HERPUD1
0	1.71285	0.568	0.017	0	8	PLEKHG1
2.54e-272	1.70571	0.604	0.201	6.73e-268	8	ADAM28
0	1.67357	0.588	0.11	0	8	EBF1
0	1.65868	0.626	0.153	0	8	SP140
7e-220	1.63961	0.866	0.745	1.86e-215	8	REL
0	1.61074	0.462	0.005	0	8	FCRL3
6.76e-133	1.60004	0.8	0.724	1.79e-128	8	ADK
0	1.58625	0.46	0.002	0	8	FCRL5
0	1.58511	0.252	0.004	0	8	ENSG00000224610
1.36e-189	1.58407	0.829	0.657	3.59e-185	8	ZFP36L1
0	1.57345	0.493	0.026	0	8	KHDRBS2
1.26e-241	1.56542	0.656	0.286	3.34e-237	8	POU2F2
5.72e-124	1.56104	0.555	0.308	1.52e-119	8	IL4R
0	1.55667	0.541	0.022	0	8	OSBPL10
4.68e-190	1.52339	0.853	0.497	1.24e-185	8	TXNIP
6.34e-165	1.52179	0.582	0.27	1.68e-160	8	ARHGAP24
2.04e-120	1.52082	0.717	0.601	5.41e-116	8	DENND4A
7.7e-73	1.50793	0.517	0.366	2.04e-68	8	IRAG2
7.33e-88	1.49349	0.555	0.377	1.94e-83	8	PLPP5
1.35e-190	1.46996	0.85	0.761	3.58e-186	8	JUND
6.25e-209	1.46791	0.865	0.59	1.66e-204	8	BTG2
0	1.44268	0.495	0.037	0	8	COBLL1
9.13e-81	1.43505	0.575	0.426	2.42e-76	8	RFTN1
4.98e-119	1.43365	0.647	0.447	1.32e-114	8	HVCN1
6.82e-174	1.42841	0.84	0.771	1.81e-169	8	FOXP1
0	1.41405	0.424	0.016	0	8	IRF4
1.19e-227	1.4129	0.953	0.792	3.15e-223	8	PNRC1
1.17e-220	1.4066	0.804	0.409	3.11e-216	8	HLA-DQB1
5.5e-221	1.38843	0.869	0.759	1.46e-216	8	EZR
0	1.38469	0.42	0.047	0	8	FCER2
3.75e-164	1.33073	0.534	0.231	9.94e-160	8	ISG20
0	1.31641	0.451	0.022	0	8	STAP1
4.37e-50	1.31593	0.63	0.583	1.16e-45	8	DUSP2
4.24e-64	1.30264	0.596	0.554	1.12e-59	8	UBALD2
0	1.29299	0.396	0.032	0	8	KCNQ5
1.12e-123	1.2828	0.864	0.751	2.97e-119	8	NFKBIA
2.94e-142	1.27267	0.799	0.726	7.79e-138	8	PARP14
1.35e-168	1.26196	0.795	0.596	3.57e-164	8	LIMD2
5.73e-125	1.25469	0.511	0.257	1.52e-120	8	CCDC50
0	1.25232	0.483	0.108	0	8	BLK
9.26e-111	1.25087	0.71	0.587	2.45e-106	8	BCL2
4.72e-89	1.2321	0.669	0.488	1.25e-84	8	SELL
2.69e-301	1.22103	0.379	0.068	7.14e-297	8	FAM30A
1.83e-34	1.2184	0.508	0.45	4.85e-30	8	PELI1
0	1.21248	0.993	0.953	0	8	RPL13A
2.21e-131	1.21011	0.563	0.288	5.85e-127	8	MTSS1
4.22e-67	1.20133	0.55	0.422	1.12e-62	8	FAM3C
3.57e-167	1.19727	0.68	0.352	9.47e-163	8	HLA-DRB6
1.68e-73	1.19418	0.572	0.425	4.44e-69	8	NFKBID
6.77e-122	1.19355	0.712	0.513	1.79e-117	8	SLC38A1
4.61e-123	1.19316	0.691	0.516	1.22e-118	8	PDCD4
4.83e-73	1.19262	0.621	0.51	1.28e-68	8	CD55
1.12e-93	1.19105	0.702	0.593	2.96e-89	8	CAMK2D
1.18e-111	1.18926	0.72	0.648	3.13e-107	8	PRDM2
2.37e-132	1.18684	0.538	0.265	6.29e-128	8	LBH
1.28e-109	1.18298	0.773	0.695	3.4e-105	8	ZCCHC7
1.44e-122	1.16992	0.88	0.799	3.81e-118	8	IER2
3.92e-154	1.16811	0.527	0.23	1.04e-149	8	GNG7
1.26e-119	1.16742	0.433	0.182	3.35e-115	8	ANKRD33B
1.88e-104	1.16709	0.43	0.19	4.98e-100	8	CCSER1
3.88e-95	1.14972	0.562	0.359	1.03e-90	8	TCF4
5.82e-101	1.1496	0.682	0.55	1.54e-96	8	SYNGR2
0	1.14854	0.4	0.002	0	8	FCRL2
2.53e-95	1.14101	0.484	0.258	6.69e-91	8	TAGAP
0	1.14058	0.353	0.034	0	8	SLAMF1
3.31e-38	1.12852	0.269	0.141	8.77e-34	8	SOX5
0	1.11326	0.991	0.938	0	8	RPS23
0	1.11016	0.427	0.045	0	8	TNFRSF13C
9.23e-106	1.10835	0.333	0.119	2.45e-101	8	RHEX
1.1e-132	1.10154	0.64	0.357	2.93e-128	8	CDK14
2.89e-48	1.08096	0.252	0.114	7.64e-44	8	PCDH9
1.37e-42	1.0697	0.613	0.599	3.64e-38	8	ATF7IP
3.65e-284	1.06773	0.986	0.934	9.67e-280	8	RPS27A
1.32e-123	1.06721	0.49	0.226	3.49e-119	8	TMEM154
1.58e-62	1.06415	0.397	0.212	4.19e-58	8	TRAF1
1.11e-81	1.06351	0.629	0.476	2.94e-77	8	JAZF1
1.1e-200	1.06152	0.975	0.83	2.91e-196	8	CD52
0	1.06131	0.395	0.024	0	8	SETBP1
1.29e-132	1.05854	0.839	0.787	3.42e-128	8	SP100
1.09e-107	1.05368	0.805	0.761	2.89e-103	8	PRKCB
4.4e-285	1.03887	0.994	0.968	1.17e-280	8	RPS8
2.53e-40	1.03261	0.475	0.348	6.71e-36	8	MARCHF1
0	1.02219	0.425	0.04	0	8	P2RY10
4.78e-65	1.01926	0.63	0.528	1.27e-60	8	ST6GAL1
4.44e-104	1.01248	0.816	0.798	1.18e-99	8	SEC62
0	1.00305	0.365	0.009	0	8	NAPSB
2.42e-200	1.00173	0.356	0.084	6.41e-196	8	TMEM156
3.03e-284	0.999674	0.993	0.954	8.02e-280	8	RPLP2
0	0.997599	0.305	0.031	0	8	TTN
2.05e-99	0.997557	0.768	0.725	5.44e-95	8	FAM107B
2.1e-39	0.994421	0.623	0.668	5.57e-35	8	VOPP1
0	0.992807	0.361	0.008	0	8	CXCR5
2.99e-272	0.987984	0.99	0.931	7.92e-268	8	RPS27
6.63e-135	0.987011	0.781	0.484	1.76e-130	8	LYN
1.75e-116	0.979838	0.417	0.17	4.63e-112	8	AP1S3
1.15e-77	0.97804	0.373	0.174	3.05e-73	8	MARCHF3
0	0.976062	0.371	0.003	0	8	FCRLA
1.3e-60	0.975951	0.497	0.346	3.43e-56	8	SEL1L3
1.24e-24	0.975419	0.275	0.176	3.29e-20	8	LIX1-AS1
7.84e-73	0.974427	0.507	0.329	2.08e-68	8	CCDC69
6.75e-100	0.973187	0.43	0.2	1.79e-95	8	BLNK
1.58e-201	0.971222	0.377	0.093	4.2e-197	8	ADAM7-AS1
1.41e-70	0.969483	0.401	0.213	3.72e-66	8	PLAC8
7.55e-178	0.96794	0.919	0.856	2e-173	8	EEF1D
8.27e-70	0.964949	0.782	0.764	2.19e-65	8	NFKB1
1.2e-105	0.96359	0.804	0.776	3.17e-101	8	FCHSD2
0	0.95923	0.274	0.012	0	8	IL2RA
0	0.952875	0.354	0.023	0	8	HLA-DOB
1.22e-267	0.948142	0.987	0.926	3.22e-263	8	RPL30
6.2e-43	0.947562	0.473	0.371	1.64e-38	8	ENSG00000291015
2.05e-81	0.945873	0.325	0.132	5.43e-77	8	SERPINB9
0	0.93842	0.36	0.052	0	8	GAPT
3.45e-54	0.934371	0.435	0.29	9.13e-50	8	TRAF4
0	0.931454	0.306	0.012	0	8	BTLA
4.84e-225	0.930053	0.981	0.934	1.28e-220	8	RPL18A
2.22e-119	0.929775	0.853	0.852	5.89e-115	8	KMT2E
8.27e-83	0.92289	0.277	0.097	2.19e-78	8	MACROD2
1.03e-71	0.917501	0.733	0.661	2.74e-67	8	SNX2
4.68e-254	0.910174	0.994	0.961	1.24e-249	8	RPL13
3.33e-244	0.907939	0.992	0.936	8.82e-240	8	RPS26
4.45e-291	0.906834	0.277	0.037	1.18e-286	8	ENSG00000290680
5.73e-43	0.904364	0.462	0.348	1.52e-38	8	RUBCNL
6.26e-61	0.902149	0.646	0.562	1.66e-56	8	PPP3CA
9.16e-73	0.900958	0.713	0.685	2.43e-68	8	SP110
5.65e-74	0.895936	0.518	0.333	1.5e-69	8	YPEL3
1.46e-76	0.893471	0.694	0.514	3.87e-72	8	EVI2B
1.5e-37	0.893433	0.46	0.363	3.96e-33	8	EAF2
0	0.893397	0.318	0.044	0	8	ADAM19
1.33e-61	0.890806	0.491	0.335	3.53e-57	8	NFKB2
1.87e-225	0.890252	0.979	0.929	4.95e-221	8	RPS11
1.85e-231	0.889334	0.986	0.929	4.9e-227	8	RPL21
3.09e-236	0.887282	0.984	0.919	8.18e-232	8	FAU
1.41e-29	0.883765	0.517	0.503	3.74e-25	8	MKNK2
2.92e-49	0.883423	0.49	0.379	7.73e-45	8	APOBEC3C
4.02e-46	0.876185	0.457	0.319	1.06e-41	8	AUTS2
9.63e-126	0.873554	0.355	0.12	2.55e-121	8	PIM2
6.48e-45	0.872431	0.462	0.335	1.72e-40	8	DIPK1A
1.14e-68	0.870259	0.683	0.57	3.02e-64	8	STRBP
1.52e-25	0.867696	0.562	0.467	4.04e-21	8	BCL2A1
1.68e-110	0.86117	0.37	0.141	4.45e-106	8	CD72
1.28e-208	0.851388	0.982	0.923	3.4e-204	8	RPL39
6.97e-37	0.849165	0.394	0.257	1.85e-32	8	PDE4B
4.61e-76	0.847086	0.743	0.684	1.22e-71	8	IL2RG
2.58e-55	0.846637	0.695	0.672	6.83e-51	8	ANKRD44
1.26e-64	0.845977	0.446	0.271	3.34e-60	8	PKIG
1.89e-53	0.843683	0.674	0.635	5.02e-49	8	PDE7A
8.58e-100	0.838613	0.354	0.135	2.27e-95	8	ALOX5
2.25e-32	0.824435	0.591	0.603	5.97e-28	8	LMBRD1
1.59e-204	0.81888	0.985	0.935	4.21e-200	8	RPL34
2.56e-56	0.818352	0.619	0.496	6.77e-52	8	TPD52
2.64e-21	0.81517	0.518	0.527	6.99e-17	8	IQSEC1
1.09e-33	0.814846	0.527	0.472	2.9e-29	8	BCL11A
1.29e-65	0.814634	0.519	0.338	3.42e-61	8	WDFY4
1.14e-34	0.810964	0.418	0.289	3.01e-30	8	PHACTR1
5.59e-107	0.810276	0.28	0.085	1.48e-102	8	CALHM6
7.94e-25	0.802885	0.502	0.438	2.1e-20	8	MDFIC
3.41e-23	0.801698	0.547	0.536	9.04e-19	8	TNFAIP3
4.1e-36	0.800397	0.636	0.625	1.09e-31	8	SIPA1L1
8.26e-74	0.799882	0.763	0.77	2.19e-69	8	SMAP2
4.28e-100	0.797902	0.914	0.793	1.13e-95	8	HLA-E
4.89e-40	0.797299	0.587	0.524	1.29e-35	8	TRAF3IP3
1.25e-175	0.792514	0.977	0.917	3.31e-171	8	RPL23A
0	0.79157	0.295	0.007	0	8	CLEC17A
1.23e-78	0.79103	0.377	0.172	3.25e-74	8	CD22
8.75e-183	0.79039	0.989	0.927	2.32e-178	8	RPL12
1.43e-57	0.789686	0.655	0.622	3.78e-53	8	NCOA3
5.13e-39	0.78751	0.638	0.591	1.36e-34	8	STX7
6.37e-41	0.786082	0.39	0.259	1.69e-36	8	DAPP1
1.01e-220	0.781844	0.997	0.978	2.67e-216	8	EEF1A1
3.06e-39	0.781071	0.586	0.57	8.11e-35	8	PTPN6
1.8e-205	0.779839	0.279	0.05	4.77e-201	8	IL21R
1.41e-32	0.778421	0.482	0.412	3.73e-28	8	SIPA1L3
2.26e-88	0.775301	0.761	0.536	5.98e-84	8	DOCK8
1.57e-31	0.774803	0.459	0.343	4.16e-27	8	GPR183
1.93e-20	0.774163	0.535	0.577	5.12e-16	8	SMC6
5.89e-185	0.770891	0.992	0.97	1.56e-180	8	RPLP1
5.04e-120	0.770861	0.281	0.078	1.34e-115	8	NR4A2
6.2e-184	0.770153	0.978	0.921	1.64e-179	8	RPL18
8.44e-87	0.766693	0.823	0.787	2.24e-82	8	TOMM7
7.5e-34	0.765048	0.474	0.388	1.99e-29	8	ZHX2
2.15e-159	0.762681	0.968	0.906	5.7e-155	8	RPS29
8.21e-25	0.761246	0.506	0.469	2.17e-20	8	DGKD
2.29e-92	0.756785	0.846	0.834	6.05e-88	8	JAK1
5.07e-61	0.753471	0.717	0.59	1.34e-56	8	ZFP36
4.87e-29	0.752515	0.458	0.389	1.29e-24	8	PPM1K
2.42e-75	0.752486	0.793	0.767	6.42e-71	8	TANK
2.27e-202	0.752159	0.995	0.953	6.02e-198	8	RPL11
3.15e-23	0.749897	0.634	0.656	8.35e-19	8	PPP1R15A
4.56e-47	0.746122	0.623	0.54	1.21e-42	8	HLA-F
5.41e-42	0.74279	0.558	0.451	1.43e-37	8	HDAC9
1.05e-168	0.739765	0.289	0.065	2.78e-164	8	POU2AF1
1.24e-22	0.73887	0.602	0.659	3.28e-18	8	MBD4
7.84e-32	0.738493	0.596	0.568	2.08e-27	8	KLHL5
7.9e-12	0.73134	0.403	0.397	2.09e-07	8	RHOF
4.6e-64	0.731151	0.363	0.183	1.22e-59	8	SESN3
7.86e-178	0.728633	0.983	0.931	2.08e-173	8	RPL8
2.34e-43	0.725134	0.308	0.167	6.2e-39	8	TAMALIN
5.33e-30	0.723012	0.372	0.274	1.41e-25	8	IFT57
2.09e-26	0.717735	0.574	0.603	5.55e-22	8	TSTD1
2.68e-163	0.7156	0.984	0.917	7.11e-159	8	RPL35A
2.49e-23	0.715464	0.55	0.568	6.6e-19	8	ARHGAP25
9.27e-159	0.7134	0.982	0.919	2.46e-154	8	RPS10
9.44e-36	0.713386	0.304	0.179	2.5e-31	8	KIAA0040
4.33e-100	0.712052	0.32	0.113	1.15e-95	8	RAB30
1.6e-53	0.706189	0.736	0.775	4.24e-49	8	ITSN2
1.81e-40	0.7051	0.755	0.681	4.78e-36	8	JUNB
1.56e-23	0.703302	0.377	0.3	4.13e-19	8	BTN2A2
0	0.702169	0.277	0.004	0	8	CD19
5.58e-30	0.699801	0.4	0.292	1.48e-25	8	RRAS2
2.74e-27	0.698945	0.376	0.28	7.26e-23	8	ZBTB10
1.22e-37	0.694935	0.721	0.761	3.22e-33	8	RABGAP1L
1.17e-132	0.692698	0.274	0.069	3.11e-128	8	HLA-DOA
1.54e-28	0.691575	0.548	0.47	4.09e-24	8	RHOH
2.36e-151	0.69088	0.983	0.927	6.25e-147	8	RPS15A
9.56e-19	0.689753	0.478	0.462	2.53e-14	8	POLD4
1.43e-30	0.687721	0.658	0.672	3.78e-26	8	ZBTB20
9.33e-11	0.685577	0.503	0.568	2.47e-06	8	PIM3
3.4e-63	0.685391	0.793	0.808	9e-59	8	SRSF5
2.22e-20	0.683185	0.413	0.362	5.89e-16	8	RBM38
7.89e-41	0.682712	0.299	0.164	2.09e-36	8	SLAMF6
7.52e-32	0.681719	0.37	0.26	1.99e-27	8	BTK
9.28e-141	0.681593	0.989	0.951	2.46e-136	8	RPS18
2.97e-162	0.679256	0.981	0.932	7.87e-158	8	RPS20
1.23e-150	0.679055	0.978	0.926	3.26e-146	8	RPL26
1.69e-142	0.676414	0.976	0.908	4.48e-138	8	RPL3
6.46e-100	0.674779	0.941	0.931	1.71e-95	8	DDX5
5.95e-58	0.673065	0.834	0.853	1.58e-53	8	SMCHD1
1.32e-39	0.672104	0.646	0.672	3.49e-35	8	PLCG2
7.87e-62	0.670541	0.663	0.507	2.09e-57	8	TRBC2
1.32e-34	0.668321	0.679	0.732	3.5e-30	8	SF1
0	0.668238	0.252	0.002	0	8	TLR10
1.06e-175	0.664403	0.992	0.963	2.8e-171	8	RPL41
1.69e-60	0.66429	0.328	0.157	4.49e-56	8	PARP15
3.61e-145	0.662954	0.982	0.925	9.57e-141	8	RPS13
9.51e-16	0.662911	0.482	0.487	2.52e-11	8	CDCA7L
4.23e-148	0.662561	0.983	0.929	1.12e-143	8	RPL7A
3.77e-30	0.660631	0.471	0.368	9.98e-26	8	RASGRP3
1.49e-21	0.660166	0.531	0.545	3.95e-17	8	CYLD
5.36e-12	0.660132	0.271	0.217	1.42e-07	8	SCIMP
1.32e-191	0.65643	0.264	0.048	3.5e-187	8	NCR3
9.32e-97	0.652729	0.978	0.918	2.47e-92	8	HLA-B
3.01e-18	0.650703	0.498	0.497	7.96e-14	8	ITPR1
8.38e-71	0.650605	0.265	0.099	2.22e-66	8	LTA
8.92e-29	0.646505	0.37	0.274	2.36e-24	8	APOBEC3G
4.56e-18	0.644429	0.37	0.301	1.21e-13	8	FOXO1
1.18e-138	0.642375	0.982	0.921	3.13e-134	8	RPS25
9.68e-120	0.64237	0.966	0.9	2.57e-115	8	RPL22
6.4e-12	0.640171	0.441	0.435	1.7e-07	8	HIVEP2
1.06e-206	0.639071	0.268	0.047	2.82e-202	8	BCAS4
1.11e-11	0.63643	0.462	0.488	2.94e-07	8	ORAI2
4.39e-21	0.636159	0.418	0.349	1.16e-16	8	CARD11
3.12e-40	0.634953	0.712	0.769	8.26e-36	8	UVRAG
1.35e-15	0.634037	0.39	0.326	3.58e-11	8	NR4A1
2.68e-08	0.631268	0.463	0.467	0.000710645	8	SKAP1
4.05e-61	0.630694	0.82	0.829	1.07e-56	8	NOP53
2.16e-09	0.629344	0.466	0.508	5.74e-05	8	SMIM14
1.56e-34	0.62852	0.685	0.696	4.13e-30	8	SNX29
2.23e-40	0.627059	0.686	0.706	5.92e-36	8	PARP1
3.73e-11	0.623147	0.408	0.402	9.88e-07	8	ZBTB24
6.09e-20	0.622938	0.61	0.675	1.61e-15	8	RCSD1
6.92e-136	0.622786	0.992	0.958	1.83e-131	8	RPS12
5.62e-24	0.621809	0.475	0.423	1.49e-19	8	RELB
4.63e-126	0.616355	0.979	0.919	1.23e-121	8	RPS16
6.38e-38	0.616273	0.543	0.416	1.69e-33	8	BASP1
1.93e-57	0.613108	0.271	0.113	5.11e-53	8	MCTP2
4.05e-27	0.611898	0.273	0.164	1.07e-22	8	PATL2
2.46e-37	0.610981	0.487	0.345	6.53e-33	8	NFKBIZ
1.12e-146	0.610009	0.992	0.95	2.96e-142	8	RPL19
9.98e-24	0.609762	0.296	0.195	2.64e-19	8	LINC01619
4.81e-52	0.609261	0.793	0.851	1.28e-47	8	ANKRD12
4.33e-22	0.608864	0.36	0.273	1.15e-17	8	DENND5B
4.6e-17	0.608802	0.591	0.628	1.22e-12	8	STK17A
1.29e-32	0.608058	0.314	0.194	3.42e-28	8	CIITA
3.82e-131	0.607769	0.984	0.941	1.01e-126	8	RPL37
3.65e-26	0.607353	0.257	0.151	9.67e-22	8	BTG1-DT
7.92e-43	0.606807	0.306	0.166	2.1e-38	8	HSH2D
4.91e-119	0.60599	0.979	0.922	1.3e-114	8	RPL29
4.63e-18	0.60567	0.478	0.456	1.23e-13	8	IER5
5.32e-110	0.605158	0.987	0.955	1.41e-105	8	RPS19
4.25e-07	0.602567	0.406	0.427	0.0112537	8	CSNK1G3
6.29e-129	0.602415	0.986	0.944	1.67e-124	8	RPL32
1.27e-37	0.601981	0.348	0.215	3.38e-33	8	TUBA4A
1.17e-34	0.601321	0.322	0.192	3.1e-30	8	CYTIP
2.85e-32	0.599126	0.377	0.255	7.54e-28	8	PPP1R16B
6.98e-25	0.595662	0.607	0.662	1.85e-20	8	KRT10
1.55e-19	0.593262	0.398	0.335	4.11e-15	8	LAT2
4.19e-96	0.592314	0.966	0.898	1.11e-91	8	RPL10A
5.94e-58	0.589423	0.281	0.123	1.57e-53	8	HCP5
2.08e-66	0.58672	0.87	0.863	5.52e-62	8	ARGLU1
3e-16	0.585254	0.354	0.292	7.95e-12	8	RASGRP2
1.8e-110	0.585209	0.984	0.937	4.76e-106	8	RPS3
1.24e-29	0.585152	0.401	0.284	3.29e-25	8	CXXC5
8.76e-119	0.581341	0.992	0.958	2.32e-114	8	RPL10
4.15e-36	0.580467	0.696	0.776	1.1e-31	8	STK4
7.36e-11	0.579191	0.46	0.468	1.95e-06	8	MIR142HG
5.27e-19	0.57562	0.428	0.371	1.4e-14	8	NEDD9
3.09e-123	0.57532	0.981	0.928	8.19e-119	8	RPL14
6.29e-119	0.574147	0.989	0.937	1.67e-114	8	RPS14
2.2e-20	0.574143	0.578	0.645	5.82e-16	8	PSMB9
1.01e-38	0.572873	0.756	0.833	2.66e-34	8	PNISR
6.33e-10	0.569939	0.396	0.391	1.68e-05	8	DDX3Y
6.61e-09	0.56982	0.346	0.325	0.000175229	8	TRIM22
5.54e-28	0.56837	0.65	0.72	1.47e-23	8	SLC35F1
1.33e-17	0.565336	0.33	0.263	3.52e-13	8	TSPAN33
3e-103	0.56378	0.979	0.919	7.94e-99	8	RPL27A
4.48e-26	0.563486	0.669	0.69	1.19e-21	8	SYK
4.71e-30	0.562886	0.78	0.796	1.25e-25	8	TLE5
2.05e-14	0.561691	0.537	0.613	5.44e-10	8	CSK
4.64e-07	0.559224	0.398	0.407	0.0122825	8	PMAIP1
4.3e-07	0.550461	0.345	0.343	0.0113915	8	SLC50A1
6.89e-91	0.550391	0.97	0.915	1.83e-86	8	RPS21
9.3e-27	0.548878	0.732	0.76	2.46e-22	8	H1-4
4.54e-19	0.548066	0.251	0.165	1.2e-14	8	LY75
2.12e-33	0.543466	0.721	0.768	5.61e-29	8	CD53
1.07e-99	0.54155	0.979	0.924	2.83e-95	8	RPL5
6.07e-09	0.534668	0.452	0.468	0.000160779	8	ZNF107
2.49e-07	0.53446	0.363	0.368	0.00660801	8	NFKBIE
1.53e-15	0.533842	0.296	0.233	4.05e-11	8	MYO1C
6.12e-43	0.532163	0.755	0.772	1.62e-38	8	RAC2
4.05e-10	0.527778	0.474	0.499	1.07e-05	8	MALT1
3.98e-88	0.527727	0.978	0.915	1.05e-83	8	RPS4X
1.72e-07	0.527578	0.354	0.355	0.00454551	8	RAB29
3.31e-09	0.5272	0.442	0.479	8.77e-05	8	TMEM243
1.72e-12	0.524419	0.323	0.281	4.56e-08	8	LPCAT1
3.5e-14	0.522126	0.634	0.742	9.26e-10	8	RSRP1
5.59e-08	0.520282	0.35	0.335	0.00148085	8	ENSG00000267787
2.34e-08	0.518872	0.376	0.371	0.000619716	8	TBC1D10C
1.79e-32	0.517545	0.276	0.156	4.74e-28	8	ZNF506
1.14e-84	0.516673	0.973	0.915	3.02e-80	8	RPS9
1.58e-09	0.514979	0.557	0.664	4.2e-05	8	SHOC2
2.29e-92	0.514042	0.978	0.914	6.06e-88	8	RPL9
5.68e-55	0.511535	0.905	0.868	1.5e-50	8	HLA-C
4.45e-07	0.510685	0.532	0.65	0.0117794	8	SMDT1
2.89e-21	0.507697	0.674	0.744	7.64e-17	8	TUT4
5.2e-07	0.506067	0.54	0.658	0.013768	8	PCGF5
2.7e-34	0.505153	0.761	0.762	7.15e-30	8	CD48
7.79e-09	0.503846	0.525	0.59	0.000206432	8	SP140L
1.54e-85	0.5038	0.976	0.927	4.08e-81	8	RPL31
1.07e-17	0.50322	0.588	0.615	2.85e-13	8	LYST
7.52e-07	0.502067	0.539	0.649	0.0199363	8	NUB1
8.74e-91	0.501107	0.976	0.949	2.32e-86	8	RPL28
