# Supplementary material for: T cell-mediated SIV dissemination into the CNS: a single-cell transcriptomic analysis
Source: Research Square preprint supplement (doi:10.21203/rs.3.rs-6537361/v1), 2025-05-09
Supplement: Supplementary file 8 [file 872e2966b67d80f40354a255.xlsx]

## Sheet: Sheet1
gene	cluster_id	logFC	logCPM	F	p_val	p_adj.loc	p_adj.glb
ISG15	TRM	2.68485	5.62863	71.3669	1.19e-05	0.0430973	0.0314692
MX1	TRM	2.30272	5.23808	66.882	1.55e-05	0.0430973	0.0347908
RHOBTB3	CD4+ CTL	-2.06471	6.93477	107.919	2.8e-06	0.0312575	0.0250953
DOK6	Proliferating	-4.04164	4.0795	123.073	3.96e-07	0.00405033	0.0159779
ADAM23	Proliferating	-2.06199	6.92874	105.634	8.29e-07	0.00424402	0.0167419
ANKRD35	Proliferating	2.60972	5.61412	83.4245	2.55e-06	0.00870759	0.0250953
PLEKHA5	Proliferating	-1.54552	6.85339	68.1082	6.56e-06	0.0104877	0.0314692
MYO1D	Proliferating	-2.50244	6.21576	69.684	5.9e-06	0.0104877	0.0314692
LOC106994091	Proliferating	2.64493	6.13187	66.8101	7.17e-06	0.0104877	0.0314692
RPS15A	Proliferating	-2.94038	7.61097	71.7389	5.16e-06	0.0104877	0.0314692
LOC114678430	Proliferating	6.38211	7.40662	64.1485	8.64e-06	0.0110553	0.0314692
RETREG1	Proliferating	-2.49227	5.17814	61.4307	1.05e-05	0.011342	0.0314692
LOC106992969	Proliferating	3.38997	4.56816	60.7381	1.11e-05	0.011342	0.0314692
LOC107000823	Proliferating	2.76786	5.38688	52.3673	2.16e-05	0.0200656	0.0368516
LOC697115	Proliferating	2.30823	5.42286	46.5679	3.61e-05	0.0205543	0.0406444
LOC106995771	Proliferating	-5.64981	5.26626	46.7168	3.56e-05	0.0205543	0.0406444
PIF1	Proliferating	2.5763	5.1736	48.6811	2.98e-05	0.0205543	0.0406444
CPQ	Proliferating	-2.16357	5.98252	46.6839	3.57e-05	0.0205543	0.0406444
ZNF337	Proliferating	-3.21746	2.87328	48.8248	2.94e-05	0.0205543	0.0406444
ARHGAP32	Proliferating	-2.24964	5.91921	49.341	2.8e-05	0.0205543	0.0406444
FRY	Proliferating	-1.53494	5.93394	46.6663	3.58e-05	0.0205543	0.0406444
DDHD1	Proliferating	1.23812	7.28202	44.2048	4.53e-05	0.0244108	0.0444013
NOS1AP	Proliferating	-2.39128	4.0856	43.2689	4.97e-05	0.0254321	0.0458281
ANK3	Proliferating	-2.57974	4.17436	41.5681	5.9e-05	0.0287665	0.0458281
FAM241A	Proliferating	-1.36184	5.62539	40.7988	6.39e-05	0.0297369	0.0465001
PAM	Proliferating	-1.87809	5.8621	39.769	7.12e-05	0.0303861	0.0476603
FER	Proliferating	-1.52247	6.29489	39.8497	7.06e-05	0.0303861	0.0476603
HAVCR2	Proliferating	2.06341	6.70772	38.0862	8.55e-05	0.0350109	0.0502828
LOC106998573	Proliferating	5.44366	7.17966	36.755	9.92e-05	0.0390737	0.0513797
USP18	Proliferating	2.12333	5.82558	35.5979	0.00011332	0.040404	0.0537731
SLC16A3	Proliferating	1.11768	6.26595	35.7974	0.000110723	0.040404	0.0537731
NBDY	Proliferating	-1.09106	6.12004	35.5155	0.000114414	0.040404	0.0537731
ATP8B2	Proliferating	-1.31437	5.04341	33.2906	0.000149327	0.0413314	0.054732
DOCK3	Proliferating	-2.6909	5.77109	33.5141	0.000145295	0.0413314	0.053851
SIK1	Proliferating	1.06386	6.59591	33.7117	0.000141837	0.0413314	0.0537731
PHACTR1	Proliferating	2.4111	5.41505	34.5682	0.00012794	0.0413314	0.0537731
IFI27	Proliferating	3.26924	7.54799	33.9685	0.000137489	0.0413314	0.0537731
SLC4A10	Proliferating	-1.90887	4.56449	33.6149	0.000143518	0.0413314	0.0538283
ZDHHC15	Proliferating	-2.21892	4.40911	34.2504	0.000132899	0.0413314	0.0537731
HMGB3	Proliferating	1.18588	6.55425	34.4658	0.000129513	0.0413314	0.0537731
HIST1H1D	Proliferating	0.8195	8.80629	32.1799	0.00017146	0.0454333	0.0572937
LOC114677681	Proliferating	1.28672	6.63961	32.1081	0.00017302	0.0454333	0.0572937
NT5DC2	Proliferating	1.67194	5.13757	31.2809	0.00019228	0.0463681	0.0595243
IRF4	Proliferating	1.73891	5.59216	31.1844	0.000194691	0.0463681	0.0600406
CDC25B	Proliferating	1.15999	6.63437	31.4301	0.000188624	0.0463681	0.0586172
CDKN2B	Proliferating	-2.33457	3.02281	31.6035	0.000184479	0.0463681	0.0582133
HIST2H2AC	Proliferating	0.727269	8.20638	30.6587	0.000208466	0.0479077	0.0614731
ZDHHC14	Proliferating	-1.59729	5.26642	30.5077	0.000212637	0.0479077	0.0619471
FCHO2	Proliferating	-1.20025	5.63129	30.417	0.000215189	0.0479077	0.0620705
LOC114679643	Proliferating	1.14407	7.20057	29.5389	0.000241888	0.0496165	0.0645018
ISG15	Proliferating	1.42026	6.54761	27.4584	0.000322635	0.0496165	0.0701419
STAC	Proliferating	-3.09303	4.38019	26.9341	0.000347825	0.0496165	0.071267
RYK	Proliferating	-1.36151	5.12712	27.5485	0.000318528	0.0496165	0.069558
LOC705310	Proliferating	2.61785	4.79774	26.9294	0.000348063	0.0496165	0.071267
HDAC9	Proliferating	-1.53189	5.57341	29.3845	0.00024698	0.0496165	0.0654946
BMT2	Proliferating	2.58192	8.49975	28.3157	0.000285974	0.0496165	0.069558
LOC705469	Proliferating	1.04281	6.47791	28.9569	0.00026177	0.0496165	0.06779
LOC705220	Proliferating	1.14292	6.07307	29.161	0.000254583	0.0496165	0.0663543
LOC114677671	Proliferating	0.925836	8.59448	29.1855	0.000253735	0.0496165	0.0663543
MBOAT1	Proliferating	-1.16489	5.46735	27.6153	0.000315524	0.0496165	0.069558
CD38	Proliferating	1.62855	7.64417	29.8039	0.000233435	0.0496165	0.0639358
CCNB1	Proliferating	1.82102	5.79769	28.7505	0.000269283	0.0496165	0.0681525
SNX24	Proliferating	-2.22999	3.99536	28.1135	0.000294153	0.0496165	0.069558
MYO9A	Proliferating	-1.04902	7.34654	27.4518	0.000322939	0.0496165	0.0701419
LYN	Proliferating	1.23275	6.90796	27.0853	0.000340327	0.0496165	0.0710219
CA1	Proliferating	-2.6429	4.55499	26.6654	0.000361642	0.0496165	0.0730499
MYC	Proliferating	1.96305	4.61478	26.7493	0.000357259	0.0496165	0.0725272
LOC107000036	Proliferating	-1.8318	4.45401	26.9051	0.000349288	0.0496165	0.071267
SORCS1	Proliferating	-2.37215	3.86725	28.4439	0.000280926	0.0496165	0.069202
GTSE1	Proliferating	1.15227	6.99974	27.0673	0.000341209	0.0496165	0.0710219
H2AFJ	Proliferating	1.28622	7.67701	27.6377	0.000314525	0.0496165	0.069558
LOC114673471	Proliferating	-1.72865	3.88841	26.9993	0.00034457	0.0496165	0.0710219
BCL2	Proliferating	-0.911288	8.27848	29.6275	0.000239023	0.0496165	0.064413
LOC693611	Proliferating	-1.94989	4.24193	27.1602	0.000336687	0.0496165	0.0710219
APOE	Proliferating	2.69423	5.9355	27.2553	0.000332127	0.0496165	0.0709926
KEG06-p04	Proliferating	-2.0197	8.4796	27.6103	0.000315747	0.0496165	0.069558
CD38	EM	2.99416	7.39972	198.66	1.24e-07	0.00129196	0.0100547
ADAM23	EM	-1.83354	8.34942	135.035	6.97e-07	0.00361629	0.0167419
SEL1L3	EM	-2.8546	5.82792	116.921	1.31e-06	0.00454175	0.0212077
HAVCR2	EM	3.44762	6.86488	109.433	1.75e-06	0.00454775	0.0235953
NR3C2	EM	-3.2724	7.03711	102.662	2.31e-06	0.00480215	0.0250953
ISG15	EM	3.23369	6.09106	70.2131	1.17e-05	0.0115444	0.0314692
MX2	EM	2.25413	5.67636	69.4653	1.22e-05	0.0115444	0.0314692
IMMP2L	EM	-1.81577	8.18193	77.9588	7.53e-06	0.0115444	0.0314692
HIST1H1D	EM	2.15043	7.2951	69.902	1.19e-05	0.0115444	0.0314692
MYO1D	EM	-2.39509	7.22538	69.7439	1.2e-05	0.0115444	0.0314692
CYSLTR2	EM	-2.45151	5.67235	73.8813	9.44e-06	0.0115444	0.0314692
STMN1	EM	2.59456	6.41362	64.4237	1.67e-05	0.0120173	0.0350716
GZMA	EM	2.48567	8.28796	64.4067	1.68e-05	0.0120173	0.0350716
ANK3	EM	-3.37766	7.32096	63.8618	1.74e-05	0.0120173	0.0350716
MKI67	EM	3.22454	6.5053	66.4194	1.47e-05	0.0120173	0.0340485
PLAC8	EM	3.86525	7.78764	61.0328	2.09e-05	0.01301	0.0368516
SERPINB1	EM	1.99748	7.13875	58.7902	2.44e-05	0.0140882	0.0375087
LY75	EM	-2.59788	5.004	57.9758	2.59e-05	0.0141324	0.0386987
LOC114679643	EM	2.00967	6.80032	56.6638	2.84e-05	0.0147438	0.0406444
GNAQ	EM	-1.69834	8.07348	54.5788	3.31e-05	0.0159233	0.0406444
GZMB	EM	1.67168	9.2701	53.3778	3.62e-05	0.0163488	0.0406444
AKT3	EM	-1.89341	7.64424	51.4463	4.2e-05	0.0171158	0.0441118
PCNX2	EM	-2.67413	6.51232	51.6564	4.14e-05	0.0171158	0.0439635
LOC114669724	EM	2.60763	4.61793	51.0481	4.34e-05	0.0171158	0.0443165
FAR2	EM	-2.90713	6.00681	50.2646	4.62e-05	0.0171158	0.0444013
CKS2	EM	2.29623	5.88365	50.3503	4.58e-05	0.0171158	0.0444013
ZFYVE9	EM	-2.40593	5.1409	48.0462	5.53e-05	0.0171754	0.0458281
PER3	EM	-1.78877	6.54939	47.6825	5.7e-05	0.0171754	0.0458281
PLEKHG1	EM	-1.42072	7.71029	48.388	5.38e-05	0.0171754	0.0458281
TNFRSF10A	EM	-2.7049	4.7777	47.8742	5.61e-05	0.0171754	0.0458281
H2AFJ	EM	1.80879	7.05544	47.1635	5.96e-05	0.0171754	0.0458289
PLEKHA5	EM	-1.53266	7.19743	48.2808	5.42e-05	0.0171754	0.0458281
MYL6B	EM	3.61686	4.36176	47.333	5.87e-05	0.0171754	0.0458281
LOC694064	EM	1.27341	7.85241	46.0966	6.52e-05	0.0180689	0.0470561
RYK	EM	-1.71841	5.99329	42.8361	8.71e-05	0.0181415	0.0502828
PRKAG2	EM	-1.24193	7.00133	44.3258	7.62e-05	0.0181415	0.0485463
LOC710876	EM	-1.44817	6.40632	42.1179	9.31e-05	0.0181415	0.0503653
GLRX5	EM	1.79773	5.76648	41.9284	9.47e-05	0.0181415	0.0503653
CPQ	EM	-2.00269	7.16986	42.4298	9.04e-05	0.0181415	0.0503653
LOC114680366	EM	2.49385	6.09824	44.4318	7.54e-05	0.0181415	0.0485463
TOMM22	EM	1.98179	5.63358	42.8777	8.68e-05	0.0181415	0.0502828
USP18	EM	2.38186	5.44712	45.4598	6.89e-05	0.0181415	0.0476603
SLC24A3	EM	-2.42459	6.31267	45.1734	7.07e-05	0.0181415	0.0476603
ADA	EM	1.55277	6.3425	41.806	9.58e-05	0.0181415	0.0504236
ST8SIA1	EM	-1.27331	7.32771	41.776	9.61e-05	0.0181415	0.0504236
LOC114673353	EM	1.89305	5.5014	43.6389	8.1e-05	0.0181415	0.0493786
ABCA5	EM	-1.67791	5.55883	44.1554	7.73e-05	0.0181415	0.0485463
BCL2	EM	-1.16022	8.87337	42.3325	9.13e-05	0.0181415	0.0503653
MAGED1	EM	-1.24596	6.56601	42.856	8.7e-05	0.0181415	0.0502828
NRIP1	EM	2.32332	7.74173	41.0586	0.000102827	0.0187289	0.0525835
SUPT4H1	EM	1.3921	6.03311	41.1382	0.000102053	0.0187289	0.0525204
TMOD2	EM	-1.78299	5.67317	40.8523	0.000104863	0.0187705	0.05271
BACH2	EM	1.89557	7.51465	40.2503	0.000111093	0.0192229	0.0537731
KIFAP3	EM	-1.45471	6.30592	39.5777	0.000118594	0.0193327	0.0537731
ZNF827	EM	-1.67741	6.86388	38.6202	0.000130363	0.0193327	0.0537731
COMTD1	EM	2.36431	4.63472	39.675	0.000117472	0.0193327	0.0537731
PITPNM2	EM	2.63045	5.92693	38.337	0.000134112	0.0193327	0.0537731
LOC100426537	EM	1.78914	5.39882	39.0117	0.000125387	0.0193327	0.0537731
KATNAL1	EM	-1.46982	6.00724	39.4058	0.000120608	0.0193327	0.0537731
LOC700134	EM	1.9581	5.13201	38.0678	0.000137798	0.0193327	0.0537731
LAGE3	EM	1.75718	6.32778	38.7781	0.000128328	0.0193327	0.0537731
CD7	EM	2.7689	6.82415	37.8302	0.000141153	0.0194556	0.0537731
IL12RB2	EM	1.56888	7.70884	36.8647	0.000155854	0.019471	0.054732
PFDN6	EM	1.57623	6.21277	36.8699	0.000155769	0.019471	0.054732
ARHGAP5	EM	-1.92322	5.64187	36.7611	0.000157539	0.019471	0.054732
SYNE2	EM	-1.37497	7.03234	37.1518	0.000151296	0.019471	0.054732
DPP4	EM	-1.17599	7.28932	37.0684	0.000152603	0.019471	0.054732
ANKRD42	EM	-1.42306	5.44303	37.5998	0.000144503	0.019471	0.0538283
CHCHD5	EM	2.10683	5.05419	36.2559	0.000166082	0.0202854	0.0566205
DOCK3	EM	-2.80459	6.15491	36.0571	0.000169598	0.0203657	0.0572937
TOX	EM	-0.876463	9.279	35.8899	0.000172624	0.0203657	0.0572937
C11H12orf75	EM	1.3217	7.76382	35.9591	0.000171363	0.0203657	0.0572937
ANKH	EM	-1.39244	6.76011	35.5466	0.000179047	0.0208862	0.0578667
LOC106995639	EM	2.28023	4.76989	35.2701	0.000184432	0.0212752	0.0582133
RPS15A	EM	-1.96404	7.07352	35.1387	0.000187059	0.0213412	0.0583553
DHRS3	EM	-1.76509	6.5644	34.4428	0.000201758	0.0225231	0.0604995
STX4	EM	1.29146	6.59979	34.5384	0.000199659	0.0225231	0.0604995
JADE2	EM	-1.1999	6.51144	34.1749	0.000207791	0.0229498	0.0614731
C16H17orf62	EM	1.53923	5.49002	33.7754	0.000217194	0.0233513	0.0620705
PM20D2	EM	-2.19909	4.92801	33.458	0.000225036	0.0235992	0.0629151
MRPL27	EM	1.43476	6.25084	33.5002	0.000223974	0.0235992	0.0628357
MCTS1	EM	1.60824	5.57409	32.5982	0.000248074	0.02525	0.0655028
LOC698860	EM	-1.5489	5.83182	31.8462	0.000270609	0.0263418	0.0681525
PPP2R2B	EM	-1.71299	8.50339	32.0404	0.00026456	0.0263418	0.0679318
MRPL13	EM	1.22827	6.19896	31.8414	0.000270761	0.0263418	0.0681525
ZMAT1	EM	-1.97375	5.43791	31.7389	0.000274024	0.0263418	0.0685467
CENPF	EM	1.18894	6.41573	31.3847	0.000285671	0.0264125	0.069558
ANKRD35	EM	3.42299	4.5825	31.0834	0.000296056	0.0264125	0.069558
RETREG1	EM	-1.96974	6.71171	31.0882	0.000295887	0.0264125	0.069558
LOC707227	EM	1.08742	7.38947	30.6159	0.000313094	0.0264125	0.069558
LOC106993126	EM	0.841761	8.19831	30.6977	0.000310027	0.0264125	0.069558
PDGFD	EM	-3.5004	6.70664	30.5348	0.000316168	0.0264125	0.069558
TRAPPC5	EM	1.75598	6.11146	31.1328	0.000294323	0.0264125	0.069558
SHKBP1	EM	1.40544	5.68537	30.9938	0.000299232	0.0264125	0.069558
MRPL28	EM	1.62097	5.37295	30.4867	0.000318008	0.0264125	0.069558
MX1	EM	2.01064	4.82232	30.2928	0.000325567	0.0268171	0.0702205
UNC119	EM	1.37461	5.36272	30.2303	0.000328046	0.0268171	0.0704933
SKAP2	EM	-1.63837	7.28309	29.9401	0.000339876	0.0270797	0.0710219
SMARCE1	EM	1.03256	7.0433	29.9187	0.000340771	0.0270797	0.0710219
SPN	EM	1.45096	5.70258	29.8967	0.000341691	0.0270797	0.0710219
CLIC5	EM	-1.26164	7.86903	29.8333	0.000344363	0.0270846	0.0710219
VPS37B	EM	1.32016	6.93802	29.7335	0.000348614	0.0272128	0.071267
HACD4	EM	1.27664	6.41445	29.5443	0.000356857	0.0276484	0.0725272
LOC107000823	EM	1.93159	4.86671	28.9847	0.000382661	0.0280368	0.07466
LOC702297	EM	2.19588	4.58392	29.0289	0.00038054	0.0280368	0.0746284
RAB24	EM	2.1341	6.15899	29.0635	0.000378892	0.0280368	0.074621
ACVR1C	EM	-2.38452	5.62174	28.976	0.000383077	0.0280368	0.07466
LOC106994091	EM	2.25811	6.28429	29.2735	0.000369071	0.0280368	0.0739955
MRPL12	EM	1.63244	5.79725	29.1159	0.000376414	0.0280368	0.0745429
LOC704173	EM	1.35615	5.22963	28.9678	0.000383474	0.0280368	0.07466
IL15	EM	-1.08857	6.29555	28.8351	0.00038994	0.0283102	0.0755549
SUMO3	EM	1.62305	6.33622	28.5654	0.000403491	0.0284969	0.0755932
VWA8	EM	-1.06068	6.64608	28.2749	0.000418732	0.0291763	0.0761997
PQBP1	EM	1.56859	5.32496	28.1271	0.000426755	0.0294891	0.0765303
CMA1	EM	2.37604	4.86439	28.0137	0.000433035	0.0295775	0.0765303
LOC694533	EM	-1.01631	6.67672	26.705	0.000514329	0.0309354	0.0799536
BHLHE40	EM	0.896205	7.65751	27.1981	0.000481683	0.0309354	0.0792649
AP1S1	EM	1.57762	5.95468	27.4279	0.000467337	0.0309354	0.0785441
AHR	EM	-1.60869	6.1513	27.1373	0.000485573	0.0309354	0.0793581
FAM120B	EM	-0.959115	7.08643	26.7016	0.000514565	0.0309354	0.0799536
SAMD3	EM	-1.34656	7.2648	26.5159	0.000527557	0.0309354	0.0807302
ANKRD6	EM	-1.90066	5.77736	27.2706	0.000477103	0.0309354	0.0791388
CCND3	EM	-0.734107	9.28323	26.518	0.000527411	0.0309354	0.0807302
LOC696005	EM	1.09392	7.31262	27.2092	0.00048098	0.0309354	0.0792649
LOC106995771	EM	-4.82952	5.41532	26.2713	0.000545288	0.0309354	0.0813581
TMED3	EM	1.605	6.49751	26.4318	0.000533576	0.0309354	0.0808367
LOC701223	EM	1.60952	6.96437	26.5246	0.000526938	0.0309354	0.0807302
ARHGAP12	EM	-0.924371	7.61027	26.8671	0.000503309	0.0309354	0.0797636
PRF1	EM	1.30368	8.09009	27.0076	0.000493994	0.0309354	0.0797041
STAMBPL1	EM	-1.18722	6.23188	26.5707	0.000523681	0.0309354	0.0807148
SLC16A7	EM	-1.31312	6.83086	27.1587	0.000484201	0.0309354	0.079356
RAN	EM	1.36375	7.09802	26.8012	0.000507759	0.0309354	0.0797673
ZNRD2	EM	2.08984	4.91441	26.4445	0.000532656	0.0309354	0.0808367
SLC44A1	EM	-1.90631	5.09349	26.2945	0.000543571	0.0309354	0.0813581
TPGS1	EM	1.47038	5.40033	26.4552	0.000531889	0.0309354	0.0808367
PIN1	EM	1.28009	6.11413	26.4641	0.000531253	0.0309354	0.0808367
SNRPD2	EM	1.25618	7.04267	26.8329	0.000505614	0.0309354	0.0797673
NOSIP	EM	1.23626	6.29846	27.4884	0.000463643	0.0309354	0.0785441
RFWD3	EM	-1.12267	6.27705	26.2975	0.000543351	0.0309354	0.0813581
KLF8	EM	-1.67393	5.19274	26.3592	0.00053883	0.0309354	0.0812749
GLMP	EM	1.77385	4.68407	26.2051	0.000550209	0.0310449	0.0813581
CRIM1	EM	-1.45875	6.88387	26.1597	0.000553616	0.0310683	0.0813581
FGFBP2	EM	3.94265	4.90774	26.0133	0.000564778	0.0315243	0.0823699
IQCG	EM	-1.03427	6.03223	25.9431	0.000570226	0.0316582	0.0826344
EDARADD	EM	-2.50816	5.23912	25.895	0.000574	0.0316982	0.082966
LMO4	EM	1.26595	7.06509	25.8371	0.000578571	0.0317816	0.0834775
LOC704341	EM	2.52127	5.59016	25.4997	0.000606159	0.0327768	0.0848812
ANAPC15	EM	1.85334	4.99752	25.5369	0.000603038	0.0327768	0.0848812
PSMD6	EM	1.12163	5.89256	25.1935	0.000632581	0.0329915	0.0858941
CIB1	EM	1.33481	6.48551	25.1724	0.000634454	0.0329915	0.0858941
LOC703700	EM	-1.16063	5.71228	25.2653	0.000626265	0.0329915	0.0858941
DDRGK1	EM	1.44074	6.15873	25.1624	0.000635347	0.0329915	0.0858941
MAP2K6	EM	-0.77799	7.86455	25.34	0.000619772	0.0329915	0.0856006
LOC693611	EM	-1.89268	5.18556	25.1601	0.000635552	0.0329915	0.0858941
NDUFAB1	EM	1.45377	6.09992	25.0516	0.000645306	0.0332074	0.0861455
MXD4	EM	1.37638	7.41851	24.6825	0.000679879	0.0333098	0.0870403
TDP1	EM	-1.52407	5.22368	24.5994	0.000687965	0.0333098	0.0870403
HGSNAT	EM	-1.21167	6.39196	24.6849	0.000679647	0.0333098	0.0870403
CRACR2A	EM	-1.14643	6.40929	24.5907	0.00068882	0.0333098	0.0870403
LOC706608	EM	2.37563	6.56915	24.7495	0.000673439	0.0333098	0.0870403
BAZ2B	EM	-1.10398	6.20835	24.8881	0.000660349	0.0333098	0.086802
LOC716637	EM	1.51201	6.80394	24.7369	0.000674645	0.0333098	0.0870403
GNLY	EM	1.16728	8.63739	24.5806	0.000689811	0.0333098	0.0870403
ZBTB38	EM	-0.897818	7.90736	24.3385	0.000714145	0.033601	0.0876957
CARD16	EM	1.77502	6.41896	24.339	0.000714085	0.033601	0.0876957
CLYBL	EM	-0.830914	7.7471	24.3628	0.000711657	0.033601	0.0876957
NDUFS2	EM	1.28395	6.37904	24.242	0.00072413	0.0338645	0.0879823
RHOBTB3	EM	-2.55906	5.93501	24.1062	0.000738467	0.0342479	0.0886495
RASGRP2	EM	1.18886	6.79914	24.1019	0.000738927	0.0342479	0.0886495
TNFRSF10D	EM	-2.1524	5.21	23.8623	0.000765104	0.0353036	0.0900787
LOC698713	EM	2.0083	5.19586	23.7461	0.000778209	0.0357494	0.0907327
PPP1R13B	EM	-1.07441	6.408	23.6602	0.000788065	0.0358846	0.091093
PATJ	EM	-2.19701	5.57668	23.5337	0.000802869	0.0362691	0.09146
LOC107000013	EM	-0.851082	7.23786	23.4792	0.000809347	0.0362691	0.09146
NME1	EM	1.37752	4.93823	23.4801	0.000809236	0.0362691	0.09146
APOE	EM	2.09781	6.36579	23.4697	0.000810483	0.0362691	0.09146
EIF3I	EM	1.50278	6.89227	23.1719	0.000847092	0.0363898	0.0923657
MRPS24	EM	1.46238	5.71431	23.3059	0.000830374	0.0363898	0.091902
FGFR1OP	EM	-1.24765	5.56662	23.1629	0.00084823	0.0363898	0.0923657
NUBPL	EM	-1.00766	6.43729	23.3455	0.000825517	0.0363898	0.091902
DUSP4	EM	1.42586	5.09283	23.3321	0.000827157	0.0363898	0.091902
RGS10	EM	1.7613	6.36154	23.2654	0.00083538	0.0363898	0.0920833
POLR2F	EM	1.22445	6.05275	23.3181	0.000828872	0.0363898	0.091902
MCF2L	EM	-1.7048	6.0866	23.1632	0.000848197	0.0363898	0.0923657
MT1E	EM	1.86899	5.07217	23.2095	0.000842356	0.0363898	0.0920984
ZC3H12B	EM	-1.20356	7.73145	23.2396	0.000838597	0.0363898	0.0920984
DNAJC8	EM	1.0344	6.43284	23.041	0.000863827	0.0367722	0.093603
MSL3	EM	1.08853	5.6206	23.0379	0.000864228	0.0367722	0.093603
TRAPPC3	EM	1.2792	5.42572	22.6362	0.000918143	0.0368678	0.0946667
MRPS36	EM	1.04519	5.77248	22.663	0.000914428	0.0368678	0.0946667
TNFRSF10B	EM	-2.23821	5.79808	22.7048	0.00090866	0.0368678	0.0946667
2025-03-08	EM	-1.33261	6.7178	22.6621	0.000914546	0.0368678	0.0946667
ERC1	EM	-1.12714	6.58503	22.781	0.000898255	0.0368678	0.0946667
ATP5F1B	EM	1.09649	6.91473	22.8195	0.000893054	0.0368678	0.0946667
FAM117A	EM	-1.11697	6.96097	22.7511	0.00090232	0.0368678	0.0946667
LOC106992311	EM	-1.36842	5.35729	22.725	0.000905889	0.0368678	0.0946667
LOC701053	EM	1.83193	4.5274	22.5853	0.000925278	0.036947	0.0949249
COMMD8	EM	1.52043	5.07212	22.4012	0.000951603	0.0378526	0.0965454
LOC712324	EM	1.62655	5.43958	22.3512	0.000958903	0.0379974	0.0967259
LOC718775	EM	1.18926	5.41705	22.2597	0.000972451	0.0380361	0.0969525
IL7R	EM	-1.53687	7.65599	22.1971	0.00098186	0.0380361	0.0969525
NCALD	EM	1.17278	6.43604	22.2308	0.000976778	0.0380361	0.0969525
POMP	EM	1.02487	6.79478	22.276	0.00097002	0.0380361	0.0969525
CFP	EM	2.54637	4.80773	22.2059	0.000980523	0.0380361	0.0969525
LOC106992647	EM	-0.901946	9.18693	22.0885	0.00099843	0.0385342	0.0976649
NDUFS3	EM	1.30452	6.01804	21.9438	0.00102105	0.0392612	0.0979959
DUSP10	EM	0.983249	6.9614	21.3648	0.00111802	0.0396253	0.0995889
CLCC1	EM	-1.20268	5.29417	21.5655	0.00108319	0.0396253	0.0995889
MAN1C1	EM	-1.69025	6.73752	21.3518	0.00112033	0.0396253	0.0995889
MCCC1	EM	-1.37364	6.0173	20.8986	0.00120432	0.0396253	0.0996284
ABHD6	EM	1.06394	6.83814	21.4633	0.00110076	0.0396253	0.0995889
BBX	EM	-0.670902	8.52977	21.3452	0.0011215	0.0396253	0.0995889
ADAP1	EM	1.22461	5.88569	21.8539	0.00103541	0.0396253	0.0986286
LOC711531	EM	-1.33054	5.35534	21.0429	0.00117678	0.0396253	0.0995889
MYO6	EM	-0.911583	6.83903	21.2251	0.00114308	0.0396253	0.0995889
FAM13A	EM	-1.20987	6.46236	21.5489	0.00108602	0.0396253	0.0995889
LOC698297	EM	2.41766	5.00643	20.9823	0.00118825	0.0396253	0.0995889
SIVA1	EM	1.61999	5.8536	21.0947	0.00116708	0.0396253	0.0995889
EIF4EBP1	EM	1.18478	5.29861	21.1262	0.00116121	0.0396253	0.0995889
TXN2	EM	1.1182	6.02598	21.5022	0.00109402	0.0396253	0.0995889
OSER1	EM	0.998223	5.78198	21.132	0.00116015	0.0396253	0.0995889
LLPH	EM	0.947437	6.11575	21.183	0.00115074	0.0396253	0.0995889
LOC718979	EM	1.435	5.20673	21.1988	0.00114787	0.0396253	0.0995889
BCL2L11	EM	1.54409	7.01204	21.1801	0.00115129	0.0396253	0.0995889
LSP1	EM	0.962701	8.27005	20.8967	0.00120469	0.0396253	0.0996284
SERGEF	EM	-1.19091	6.75441	20.8895	0.00120609	0.0396253	0.0996416
CRTAM	EM	-1.29825	5.16727	21.1871	0.00115001	0.0396253	0.0995889
PSMB6	EM	1.36901	6.81667	21.1497	0.00115688	0.0396253	0.0995889
POLDIP2	EM	1.45441	4.6825	21.1503	0.00115676	0.0396253	0.0995889
PHLPP1	EM	-1.5018	6.58065	21.001	0.0011847	0.0396253	0.0995889
ELOF1	EM	1.76671	4.72061	21.2974	0.00113003	0.0396253	0.0995889
RFXANK	EM	1.49066	5.12959	21.2583	0.00113705	0.0396253	0.0995889
ZNF569	EM	-0.957292	5.99586	21.5159	0.00109168	0.0396253	0.0995889
TUFM	EM	1.62472	6.07936	21.3881	0.0011139	0.0396253	0.0995889
APOBR	EM	1.17133	5.86701	21.532	0.0010889	0.0396253	0.0995889
NUDT21	EM	0.999297	6.14374	21.3666	0.00111769	0.0396253	0.0995889
AP1S2	EM	0.927014	7.13625	20.9393	0.00119647	0.0396253	0.0996177
HSD17B10	EM	1.14046	6.06443	20.9958	0.00118569	0.0396253	0.0995889
LOC708994	EM	-1.415	7.36158	21.7027	0.00106013	0.0396253	0.0991119
LOC701020	EM	-1.37059	5.94777	20.9101	0.0012021	0.0396253	0.0996177
PAXX	EM	1.14937	5.4006	20.8589	0.00121204	0.0396954	0.0999293
TMEM106A	EM	1.08825	5.95787	20.7924	0.00122511	0.0399973	0.100387
TRIM27	EM	-0.930669	6.08612	20.6938	0.00124479	0.0403372	0.100902
ARHGAP10	EM	-1.85031	6.23479	20.6657	0.00125047	0.0403372	0.100902
TSNARE1	EM	-1.05712	5.87633	20.6628	0.00125107	0.0403372	0.100902
URGCP	EM	-0.888431	6.22153	20.6367	0.00125637	0.0403829	0.100902
FLNA	EM	0.729066	8.22265	20.5978	0.00126433	0.0403884	0.100949
ST8SIA4	EM	-0.645029	8.83319	20.5618	0.00127176	0.0404263	0.100949
MTFP1	EM	1.35999	5.3406	20.4846	0.00128785	0.0407635	0.101444
MRPL53	EM	0.997148	6.80352	20.4529	0.00129453	0.0408505	0.101549
HEBP2	EM	1.06214	5.64663	20.4017	0.0013054	0.0410688	0.102204
LOC114676952	EM	-1.07459	5.76305	20.356	0.00131521	0.0412266	0.102637
IAH1	EM	1.28201	5.85409	20.2866	0.00133027	0.0412266	0.102757
ZNF618	EM	-1.36923	6.96205	20.3186	0.00132332	0.0412266	0.10271
KLF2	EM	0.827359	7.98081	20.295	0.00132845	0.0412266	0.102757
NCBP2AS2	EM	1.38815	5.10968	20.148	0.001361	0.0417287	0.103449
RNF7	EM	1.35466	6.35593	20.1551	0.0013594	0.0417287	0.103424
RILPL2	EM	0.878901	6.75234	20.1411	0.00136255	0.0417287	0.103458
MT1M	EM	2.33296	5.16258	20.1684	0.00135642	0.0417287	0.103299
LSM5	EM	1.61255	5.78501	20.103	0.00137116	0.0418687	0.103928
GALNT2	EM	-0.975493	7.01381	19.9504	0.00140628	0.0419037	0.104362
PMVK	EM	0.996609	5.97644	20.0386	0.00138584	0.0419037	0.10417
VAV3	EM	-1.27343	8.47429	20.0435	0.00138473	0.0419037	0.10417
EAF1	EM	1.29918	5.04058	20.0707	0.0013785	0.0419037	0.10417
JAZF1	EM	-0.835758	8.74517	19.9712	0.00140143	0.0419037	0.104362
SUPT3H	EM	-0.69217	8.44639	20.0005	0.00139464	0.0419037	0.104362
BAK1	EM	1.52235	5.42354	19.9404	0.00140863	0.0419037	0.104362
LOC703057	EM	2.72588	4.83296	19.9545	0.00140534	0.0419037	0.104362
SELPLG	EM	0.924655	6.82484	20.0082	0.00139285	0.0419037	0.104362
ITGA1	EM	-1.63369	6.80565	19.9003	0.00141807	0.0419686	0.104507
SLAMF1	EM	-1.64718	6.50494	19.7582	0.0014521	0.0425928	0.105355
ADTRP	EM	1.71658	5.25527	19.7238	0.00146051	0.0425928	0.105355
PLCB1	EM	-2.67006	7.14139	19.7356	0.00145762	0.0425928	0.105355
NDUFB7	EM	1.31058	6.94104	19.7472	0.00145478	0.0425928	0.105355
CTSB	EM	1.07449	6.25433	19.577	0.00149698	0.0431878	0.10642
NDUFB10	EM	1.12358	6.76772	19.5748	0.00149756	0.0431878	0.10642
HSBP1	EM	1.36903	5.9152	19.5796	0.00149634	0.0431878	0.10642
TMEM127	EM	1.02878	5.71673	19.5158	0.00151253	0.0434988	0.107107
LOC707117	EM	1.4783	4.96739	19.4807	0.00152154	0.043637	0.107275
LOC106994956	EM	-1.16479	5.48769	19.4164	0.00153818	0.043872	0.107603
CD244	EM	-1.25495	6.91724	19.2744	0.00157574	0.0445339	0.109017
UBE2L3	EM	0.786874	7.0784	19.2481	0.00158284	0.0445339	0.109214
GALNT3	EM	0.834236	7.63583	19.2748	0.00157564	0.0445339	0.109017
PSMD4	EM	1.26855	6.45122	19.225	0.00158908	0.0445752	0.109373
TCF7L2	EM	-1.50355	5.5628	19.211	0.00159289	0.0445752	0.109414
ATF3	EM	-1.28414	5.91781	19.0678	0.00163244	0.0448358	0.110393
LOC114675357	EM	-1.17154	6.27752	19.0956	0.00162466	0.0448358	0.110372
PSMD13	EM	0.863154	6.8351	19.0923	0.0016256	0.0448358	0.110372
PHLPP2	EM	-0.957926	5.94385	19.074	0.0016307	0.0448358	0.110393
PSMA4	EM	1.40146	6.86676	19.0057	0.00164996	0.0451977	0.110933
NCOA7	EM	-1.06863	7.62942	18.9672	0.00166092	0.0453156	0.111229
C15H9orf16	EM	1.17621	6.72214	18.9448	0.00166736	0.0453156	0.111342
SLC25A5	EM	1.90207	7.2779	18.9477	0.00166653	0.0453156	0.111342
ZNF346	EM	-1.06433	5.38547	18.8543	0.00169363	0.0456708	0.112442
MTRR	EM	-1.07061	5.6308	18.7938	0.00171147	0.0460323	0.112681
SSBP2	EM	-1.05252	8.10871	18.7714	0.00171814	0.0460924	0.112681
CNIH4	EM	1.04992	6.66266	18.3407	0.00185268	0.0460944	0.113856
SLC4A7	EM	-0.622125	8.60109	18.3555	0.00184783	0.0460944	0.113832
GNB2	EM	0.895727	7.08731	18.331	0.00185585	0.0460944	0.113856
AOAH	EM	-1.16822	5.46883	18.3603	0.00184627	0.0460944	0.113832
INSIG1	EM	0.951892	6.23272	18.3641	0.00184505	0.0460944	0.113832
GTF3C6	EM	1.23788	6.09667	18.3326	0.00185533	0.0460944	0.113856
UST	EM	1.68348	5.66992	18.5362	0.00179006	0.0460944	0.113425
MTHFD1L	EM	-1.13681	5.73129	18.4998	0.00180155	0.0460944	0.113631
ACOT13	EM	1.68911	5.08243	18.7358	0.00172879	0.0460944	0.112946
CCDC32	EM	1.02807	5.87987	18.4715	0.00181051	0.0460944	0.113832
MED30	EM	1.29184	5.61087	18.6944	0.0017413	0.0460944	0.112979
CHCHD1	EM	1.23854	5.90958	18.7044	0.00173828	0.0460944	0.112979
HERC4	EM	-0.592127	8.61628	18.5741	0.00177823	0.0460944	0.11331
TUBA1A	EM	-1.00918	6.52	18.6832	0.0017447	0.0460944	0.112986
CDK4	EM	1.49067	4.5141	18.6663	0.00174985	0.0460944	0.112986
TRIAP1	EM	1.74816	4.46541	18.405	0.0018318	0.0460944	0.113832
POLE4	EM	1.28962	6.20483	18.5482	0.00178631	0.0460944	0.113425
SPAG7	EM	1.21118	5.83131	18.6131	0.00176615	0.0460944	0.112986
SMIM7	EM	1.28338	7.03692	18.3814	0.00183943	0.0460944	0.113832
LOC706177	EM	1.23236	5.67362	18.6937	0.00174151	0.0460944	0.112979
SNRPA	EM	1.17229	5.44568	18.3538	0.00184841	0.0460944	0.113832
SEPHS2	EM	1.32882	6.53974	18.3001	0.00186601	0.0461135	0.113961
MPZL3	EM	-1.01715	7.20951	18.2503	0.00188252	0.0462041	0.114267
PSMA1	EM	0.684773	7.77434	18.2033	0.00189826	0.0463713	0.114267
PTPN12	EM	0.973046	7.01912	18.1768	0.0019072	0.0464801	0.114267
MRPS21	EM	1.07055	5.47695	18.1306	0.00192294	0.0465716	0.114495
DR1	EM	0.947331	5.98922	18.1053	0.0019316	0.0465716	0.114667
ATP6V0B	EM	1.29826	5.99347	18.0483	0.00195133	0.0465716	0.114831
DNAJB11	EM	1.43606	5.76314	18.0484	0.0019513	0.0465716	0.114831
MFHAS1	EM	-1.36044	6.45537	18.1217	0.00192599	0.0465716	0.114592
UCP2	EM	1.42939	8.0957	18.0538	0.00194941	0.0465716	0.114831
NT5DC1	EM	-0.742384	7.66313	17.9706	0.00197863	0.0467436	0.115663
MRPL11	EM	1.3528	6.21157	17.9716	0.00197828	0.0467436	0.115663
ISCA1	EM	0.855863	7.17458	17.9638	0.00198104	0.0467436	0.115663
VPS25	EM	1.36575	5.02264	17.9722	0.00197806	0.0467436	0.115663
SLC9A7	EM	-0.959545	6.66416	17.9704	0.0019787	0.0467436	0.115663
TMEM65	EM	-1.12788	5.46615	17.9499	0.00198598	0.0467537	0.115774
LRIG2	EM	-0.877951	6.23031	17.9002	0.00200375	0.0469386	0.116353
DMAP1	EM	1.22641	4.95856	17.8441	0.00202405	0.0469386	0.116505
LOC106998611	EM	2.09195	6.33646	17.8875	0.00200832	0.0469386	0.116353
CCDC7	EM	-1.25069	6.16992	17.832	0.00202845	0.0469386	0.116505
LAG3	EM	1.83854	6.70904	17.8704	0.00201451	0.0469386	0.116353
ARPC5L	EM	0.837129	7.16301	17.8278	0.00203	0.0469386	0.116505
LOC100427033	EM	-1.47386	5.29418	17.8045	0.00203853	0.0470312	0.116567
BICD1	EM	-1.34532	6.3075	17.7543	0.00205708	0.0471448	0.116921
MT2A	EM	1.38928	6.22963	17.7782	0.00204823	0.0471448	0.116921
ZYX	EM	1.12984	6.45388	17.7115	0.00207302	0.0473013	0.117116
LOC706774	EM	2.00579	5.35416	17.6685	0.00208921	0.047462	0.117551
MRPL20	EM	1.19429	6.27379	17.6177	0.00210854	0.0475926	0.11791
RESF1	EM	-0.811381	8.06368	17.5812	0.00212256	0.0478013	0.118438
IVNS1ABP	EM	-0.804737	7.16022	17.5209	0.00214598	0.048038	0.118652
HMGB2	EM	0.87977	7.42744	17.5367	0.00213983	0.048038	0.118652
CLTA	EM	1.10721	7.28353	17.5185	0.00214695	0.048038	0.118652
ATP5PB	EM	0.906964	6.97513	17.4525	0.00217292	0.0482837	0.119109
DAXX	EM	1.07902	5.73409	17.4201	0.00218584	0.0482837	0.119245
CHURC1	EM	0.842102	6.7009	17.4655	0.00216778	0.0482837	0.119078
TPD52	EM	-1.35465	7.63309	17.4376	0.00217886	0.0482837	0.119245
NTNG2	EM	-0.94445	6.3541	17.4661	0.00216754	0.0482837	0.119078
MRPL34	EM	1.55229	6.34185	17.3631	0.00220878	0.0485837	0.119775
PIN4	EM	1.09272	5.19162	17.3509	0.00221372	0.0485895	0.119887
ZCCHC14	EM	-1.02042	5.74346	17.3228	0.00222517	0.0487377	0.1201
MRPL47	EM	1.32591	5.73154	17.3081	0.00223117	0.0487663	0.120233
YWHAB	EM	0.755916	8.21272	17.2419	0.0022585	0.0491566	0.120699
SLC5A3	EM	-1.23427	5.27794	17.2212	0.00226713	0.0491763	0.120699
PCBP1	EM	1.19757	7.59038	17.2058	0.00227361	0.0491763	0.120699
RASSF3	EM	-0.609776	8.17313	17.1798	0.00228453	0.0492861	0.120759
EHBP1	EM	-0.782837	8.14412	17.1711	0.00228821	0.0492861	0.120759
KLRD1	EM	-0.862993	6.99705	17.1302	0.00230556	0.0494551	0.121358
CCDC85B	EM	1.59531	6.90747	17.1188	0.00231042	0.0494573	0.121501
PNPLA7	EM	-0.848267	6.48751	17.0589	0.00233624	0.0498046	0.122213
MRPL9	EM	1.32897	5.51009	16.8546	0.00242684	0.0499402	0.123243
KLHL6	EM	-0.909113	6.41685	16.8185	0.00244334	0.0499402	0.123243
NUDT1	EM	1.13084	5.85191	16.8653	0.00242203	0.0499402	0.123243
PDAP1	EM	0.805838	6.39057	16.9843	0.00236882	0.0499402	0.123005
NDUFA5	EM	0.906988	6.05757	16.8512	0.00242841	0.0499402	0.123243
SF3B5	EM	1.21141	6.19726	16.9504	0.00238384	0.0499402	0.123243
COPS4	EM	0.966385	5.75249	16.8263	0.00243977	0.0499402	0.123243
SNX25	EM	-0.889209	6.86759	16.8215	0.00244194	0.0499402	0.123243
MRPS30	EM	1.01213	5.44453	16.8392	0.00243387	0.0499402	0.123243
PCGF5	EM	-0.733684	7.7185	16.9589	0.00238007	0.0499402	0.123243
TMEM263	EM	1.32375	5.51423	16.8564	0.00242606	0.0499402	0.123243
SRBD1	EM	-0.938515	6.42136	16.9963	0.00236357	0.0499402	0.12289
USP20	EM	-1.12142	6.0147	16.8074	0.00244843	0.0499402	0.123257
SNRPD1	EM	1.00461	6.48272	16.963	0.00237824	0.0499402	0.123243
KIAA0355	EM	-0.958683	6.33077	16.8192	0.00244298	0.0499402	0.123243
ARHGAP6	EM	-1.61892	5.58522	16.8398	0.00243361	0.0499402	0.123243
ISG15	γδ T cells	3.08024	4.90648	71.5204	5.53e-06	0.0422814	0.0314692
USP18	γδ T cells	2.90527	4.55567	59.7449	1.25e-05	0.0479028	0.0314692
NOS1AP	NK cell	-2.34732	6.12474	64.472	4.3e-06	0.0175308	0.0314692
LOC705310	NK cell	3.0628	5.18094	66.8134	3.6e-06	0.0175308	0.0290659
PDE9A	NK cell	-2.79279	5.59035	45.1429	2.44e-05	0.0182249	0.0375087
MX1	NK cell	3.40717	4.77658	51.6939	1.28e-05	0.0182249	0.0314692
RUNX2	NK cell	-1.41439	7.75753	45.9171	2.25e-05	0.0182249	0.0368516
LDB2	NK cell	-1.64388	7.66723	52.5786	1.18e-05	0.0182249	0.0314692
ITGA1	NK cell	-2.11098	6.34237	53.5586	1.08e-05	0.0182249	0.0314692
DPP4	NK cell	-2.15639	6.55606	47.1219	1.99e-05	0.0182249	0.0368516
CRIM1	NK cell	-1.72747	6.70877	45.0771	2.46e-05	0.0182249	0.0375087
RAP1GAP2	NK cell	1.3511	8.73237	47.465	1.93e-05	0.0182249	0.0368516
APOE	NK cell	2.66742	6.1574	48.5597	1.73e-05	0.0182249	0.0350716
KLF3	NK cell	1.09762	7.46634	41.5741	3.6e-05	0.0195745	0.0406444
BANK1	NK cell	-1.64779	7.28621	42.3192	3.31e-05	0.0195745	0.0406444
LOC106999346	NK cell	-2.17019	6.28961	41.5529	3.6e-05	0.0195745	0.0406444
MPZL3	NK cell	-1.18762	7.58274	42.0846	3.4e-05	0.0195745	0.0406444
FCMR	NK cell	-1.65965	6.86981	40.8565	3.9e-05	0.0198489	0.0424089
SBNO2	NK cell	1.37214	6.65454	39.2084	4.71e-05	0.0225907	0.0448032
FGFBP2	NK cell	4.44781	5.31161	36.9583	6.17e-05	0.0244835	0.0459761
ZNF827	NK cell	-1.17526	7.17961	36.0478	6.91e-05	0.0244835	0.0476603
SCUBE1	NK cell	2.47101	5.73033	36.332	6.67e-05	0.0244835	0.0472492
CPT1A	NK cell	1.33008	6.88241	37.3861	5.86e-05	0.0244835	0.0458281
SETBP1	NK cell	1.77987	7.61614	36.2664	6.72e-05	0.0244835	0.0472492
RPS15A	NK cell	-3.21281	8.04647	37.4006	5.85e-05	0.0244835	0.0458281
EZH2	NK cell	1.63157	6.50224	35.4883	7.42e-05	0.0251763	0.0485463
ARMC2	NK cell	-1.78331	6.24548	34.3186	8.62e-05	0.0252607	0.0502828
MTSS1	NK cell	1.97132	7.88189	35.1408	7.75e-05	0.0252607	0.0485463
KANSL1L	NK cell	-1.3905	6.56935	34.2619	8.68e-05	0.0252607	0.0502828
IL18R1	NK cell	-1.8079	5.976	34.77	8.13e-05	0.0252607	0.0493786
HDAC9	NK cell	-1.71664	7.53696	32.8428	0.000104735	0.0285264	0.05271
ARHGAP18	NK cell	-1.27412	6.97303	32.8218	0.000105031	0.0285264	0.05271
GRAMD1B	NK cell	-0.95658	7.49738	32.3341	0.000112196	0.0294895	0.0537731
ADAP1	NK cell	1.55834	5.75561	30.6902	0.000140945	0.0305086	0.0537731
CYB5R3	NK cell	1.49347	5.97117	31.0036	0.000134852	0.0305086	0.0537731
CEMIP2	NK cell	0.934544	8.3888	31.4827	0.000126124	0.0305086	0.0537731
EVI2A	NK cell	-1.4681	6.17968	30.9464	0.000135941	0.0305086	0.0537731
ARSG	NK cell	-1.61912	6.44692	30.6234	0.000142284	0.0305086	0.0537731
LOC106994447	NK cell	-1.78632	6.29751	30.715	0.00014045	0.0305086	0.0537731
KLF2	NK cell	1.17554	8.19944	31.8059	0.00012061	0.0305086	0.0537731
MX2	NK cell	2.89366	4.82997	29.9255	0.000157215	0.0312437	0.054732
ABLIM1	NK cell	0.749034	8.48648	29.9305	0.000157102	0.0312437	0.054732
NEDD4L	NK cell	-1.78429	7.11911	30.1698	0.000151789	0.0312437	0.054732
ANKRD6	NK cell	-1.24352	6.98423	29.3879	0.000169977	0.0329756	0.0572937
GZMK	NK cell	-1.08159	7.73269	29.0508	0.000178603	0.0338432	0.0578667
LOC699110	NK cell	-1.37702	6.26258	28.7681	0.000186231	0.0344865	0.0583219
CD160	NK cell	-2.21763	6.58792	28.2568	0.000201023	0.0358911	0.0604995
TPM1	NK cell	-1.83992	5.639	28.2041	0.000202625	0.0358911	0.0604995
BHLHE40	NK cell	0.864569	7.69367	27.7261	0.000217857	0.037768	0.0620705
C1H1orf21	NK cell	1.24921	7.45666	27.2314	0.000235055	0.0383045	0.063946
SEL1L3	NK cell	-1.34174	6.86443	27.2918	0.00023287	0.0383045	0.0639358
FLNA	NK cell	1.0162	7.94717	27.3516	0.000230733	0.0383045	0.0639358
SIRT2	NK cell	0.98014	6.96907	26.9061	0.000247232	0.0394989	0.0654946
CPE	NK cell	-2.1647	5.67072	26.5058	0.000263245	0.0412409	0.0679318
IFI27	NK cell	3.18941	6.56154	26.3864	0.000268259	0.0412409	0.0681525
LYN	NK cell	0.792293	8.22291	26.2238	0.000275263	0.0415341	0.0686441
MKI67	NK cell	3.25923	4.99231	25.7854	0.000295241	0.0429576	0.069558
CKLF	NK cell	-0.977119	7.25422	25.869	0.000291304	0.0429576	0.069558
PITPNM2	NK cell	1.65232	6.68825	25.3965	0.000314405	0.0449433	0.069558
RNF144A	NK cell	1.2109	7.08491	25.1761	0.000325908	0.0457844	0.0702205
ATP8B4	NK cell	-0.78934	8.05254	24.4955	0.000364689	0.049884	0.0732989
FAM53B	NK cell	0.878568	7.80061	24.2564	0.000379579	0.049884	0.074621
ZBTB16	NK cell	-0.996781	7.44072	24.3394	0.000374331	0.049884	0.0743125
JAML	NK cell	-2.09609	5.9546	24.2792	0.000378129	0.049884	0.074621
