# Supplementary material for: T cell-mediated SIV dissemination into the CNS: a single-cell transcriptomic analysis
Source: Research Square preprint supplement (doi:10.21203/rs.3.rs-6537361/v1), 2025-05-09
Supplement: Supplementary file 9 [file 8a84f8e19dcc21a9c9473e97.xlsx]

## Sheet: Cluster 0
p_val	avg_log2FC	pct.1	pct.2	p_val_adj	cluster	gene
0	1.57475	0.888	0.316	0	0	GPHN
0	1.55268	0.975	0.435	0	0	BACH2
0	1.4167	0.865	0.303	0	0	RFLNB
0	1.37566	0.884	0.325	0	0	PLAC8
0	1.22927	0.888	0.386	0	0	CA6
0	1.2133	0.942	0.501	0	0	SATB1
0	1.19152	0.859	0.355	0	0	CERS6
0	1.17732	0.772	0.255	0	0	RASGRF2
0	1.15411	0.69	0.238	0	0	KCNQ5
0	1.08137	0.604	0.189	0	0	MAML3
0	1.0775	0.885	0.491	0	0	PDK1
0	1.00235	0.731	0.29	0	0	AFF3
0	0.998529	0.926	0.524	0	0	PECAM1
0	0.991112	0.737	0.253	0	0	SELL
0	0.969202	0.727	0.305	0	0	RGS10
0	0.95969	0.415	0.07	0	0	SNED1
0	0.956447	0.826	0.427	0	0	ITGA6
0	0.95503	0.667	0.245	0	0	SFRP5
0	0.929434	0.987	0.567	0	0	LEF1
0	0.888334	0.506	0.163	0	0	UBE2E2
0	0.849852	0.849	0.435	0	0	CD7
0	0.84955	0.621	0.287	0	0	RPIA
0	0.822946	0.948	0.652	0	0	MAML2
0	0.787504	0.7	0.357	0	0	OXR1
0	0.783779	0.519	0.197	0	0	MARCH3
0	0.769796	0.598	0.219	0	0	NRIP1
0	0.752736	0.66	0.319	0	0	RETREG1
0	0.740498	0.884	0.517	0	0	RCAN3
0	0.738962	0.998	0.923	0	0	FOXP1
0	0.736895	0.467	0.162	0	0	LOC106997133
0	0.726774	0.419	0.112	0	0	DIP2C
0	0.720417	0.809	0.48	0	0	TCF7
0	0.719595	1	0.964	0	0	LOC703455
0	0.715649	0.401	0.162	0	0	ADAMTS6
0	0.695368	0.599	0.293	0	0	NBEA
0	0.685293	1	0.976	0	0	RPS27A-1
0	0.67384	0.338	0.1	0	0	TMEM117
0	0.668674	0.345	0.055	0	0	TMIGD2
0	0.662992	0.999	0.966	0	0	RPL22
0	0.6571	0.999	0.97	0	0	RPL10A
0	0.655914	0.771	0.516	0	0	LOC696998
0	0.649436	0.798	0.555	0	0	ST6GAL1
0	0.64766	1	0.957	0	0	RPL35A
0	0.647507	1	0.978	0	0	RPL30
0	0.644491	0.999	0.963	0	0	RPS13
0	0.64011	0.466	0.225	0	0	TANC1
0	0.635434	0.905	0.741	0	0	NSA2
0	0.63084	0.968	0.873	0	0	LOC702677
0	0.630344	0.304	0.088	0	0	TTC28
0	0.628619	0.999	0.949	0	0	RPS25
0	0.626407	0.743	0.434	0	0	IL6ST
0	0.622311	0.999	0.96	0	0	RPL34
0	0.618854	0.996	0.938	0	0	BTG1
0	0.615751	0.998	0.942	0	0	RPL32
0	0.614517	0.999	0.959	0	0	RPL23
0	0.600311	0.995	0.936	0	0	RPL14
0	0.59693	0.677	0.423	0	0	SLC30A7
0	0.595551	0.332	0.101	0	0	AUTS2
0	0.595423	0.487	0.232	0	0	NR3C2
0	0.591904	0.999	0.96	0	0	RPL37A-1
0	0.585853	0.819	0.627	0	0	AFF1
0	0.580176	1	0.969	0	0	RPL21
0	0.580175	0.653	0.451	0	0	CRLF3
0	0.574375	0.609	0.33	0	0	ST6GALNAC5
0	0.571768	0.642	0.428	0	0	ARHGEF7
0	0.570638	0.882	0.661	0	0	ADD3
0	0.567683	0.44	0.198	0	0	PITPNM2
0	0.561859	0.513	0.255	0	0	SLC22A23
0	0.55796	0.77	0.57	0	0	SIPA1L1
0	0.554888	0.711	0.502	0	0	EEA1
0	0.548791	1	0.969	0	0	RPS28
0	0.548577	0.999	0.965	0	0	RPL9
0	0.54851	1	0.977	0	0	RPS8
0	0.54707	0.43	0.217	0	0	SBF2
0	0.545589	0.442	0.236	0	0	LOC702071
0	0.542609	0.286	0.095	0	0	TANC2
0	0.542602	0.915	0.859	0	0	LOC114669857
0	0.535541	0.999	0.964	0	0	RPS26
0	0.534541	0.999	0.973	0	0	RPL5
0	0.534305	0.529	0.296	0	0	ATF7IP2
0	0.530614	0.999	0.971	0	0	NACA
0	0.523689	0.94	0.815	0	0	PCED1B
0	0.522179	0.995	0.942	0	0	RPL37A
0	0.521449	0.996	0.945	0	0	RPS24
0	0.520304	0.999	0.97	0	0	RPL12
0	0.520012	1	0.98	0	0	RPS15
0	0.512545	0.999	0.954	0	0	RPL37
0	0.505599	0.528	0.26	0	0	EVA1C
0	0.505111	0.999	0.969	0	0	RPL27A
0	0.504955	0.728	0.491	0	0	IPCEF1
0	0.502021	1	0.972	0	0	RPS23
0	0.496033	0.977	0.902	0	0	LOC107000809
0	0.49405	0.999	0.969	0	0	RPS4X
0	0.488523	0.538	0.314	0	0	TESPA1
0	0.482924	0.369	0.166	0	0	GSTT1
0	0.480874	0.36	0.134	0	0	HMGN3
0	0.480554	1	0.977	0	0	RPS21
0	0.477405	0.807	0.653	0	0	PDE7A
0	0.473889	1	0.976	0	0	RPS16
0	0.47363	0.41	0.204	0	0	TMEM63A
0	0.47138	0.997	0.952	0	0	EEF1G
0	0.468797	0.999	0.965	0	0	RPL24
0	0.46871	0.413	0.203	0	0	ACTN1
0	0.467666	0.827	0.677	0	0	LOC704147
0	0.466804	0.665	0.48	0	0	SNX29
0	0.465375	0.999	0.966	0	0	RPL28
0	0.464092	0.41	0.201	0	0	CTSH
0	0.46175	1	0.975	0	0	RPL6
0	0.460157	0.354	0.155	0	0	PRAG1
0	0.457987	0.999	0.96	0	0	RPS27
0	0.455986	0.927	0.793	0	0	SEPTIN6
0	0.455381	0.985	0.924	0	0	BCL11B
0	0.452738	1	0.977	0	0	RPLP1
0	0.451036	1	0.977	0	0	RPS12
0	0.450938	1	0.983	0	0	RPS18
0	0.448612	0.999	0.962	0	0	RPL38
0	0.447671	0.999	0.974	0	0	RPS5
0	0.44101	0.999	0.966	0	0	RPS29
0	0.43946	1	0.979	0	0	RPS7
0	0.439167	0.992	0.772	0	0	LTB
0	0.438701	0.999	0.975	0	0	RPL8
0	0.434418	0.641	0.338	0	0	PLCL1
0	0.43013	0.994	0.956	0	0	IKZF1
0	0.42923	0.579	0.332	0	0	DNM3
0	0.425961	0.999	0.968	0	0	RPL19
0	0.418625	0.993	0.93	0	0	CAMK4
0	0.416974	0.999	0.966	0	0	RPL15
0	0.416732	1	0.968	0	0	RPLP2
0	0.416022	0.997	0.949	0	0	TOMM7
0	0.41523	1	0.978	0	0	RPL18
0	0.410337	0.886	0.765	0	0	RSL24D1
0	0.408967	0.999	0.964	0	0	LOC712274
0	0.404885	1	0.977	0	0	RPS14
0	0.400131	0.918	0.804	0	0	LOC716530
0	0.389081	0.999	0.972	0	0	TPT1
0	0.387112	0.981	0.905	0	0	CCND3
0	0.385538	0.999	0.971	0	0	RPS20
0	0.381364	1	0.973	0	0	RPSA
0	0.381083	0.999	0.968	0	0	RPL27
0	0.380404	0.999	0.963	0	0	RPL11
0	0.376981	1	0.976	0	0	RPS10
0	0.373565	0.985	0.928	0	0	EIF3K
0	0.372471	0.968	0.895	0	0	LOC106996680
0	0.372043	0.955	0.869	0	0	EIF3E
0	0.367875	0.995	0.942	0	0	RPL7
0	0.353412	1	0.983	0	0	RPL13
0	0.3476	0.999	0.977	0	0	RPS9
0	0.344334	0.999	0.973	0	0	RPS3
0	0.338434	0.999	0.965	0	0	RPS11
0	0.333099	0.999	0.972	0	0	RACK1
0	0.33118	0.998	0.963	0	0	RPS4Y1
0	0.329972	1	0.98	0	0	RPS19
0	0.328066	1	0.972	0	0	UBA52
0	0.32391	0.982	0.935	0	0	NME2
0	0.318566	1	0.976	0	0	RPL41
0	0.312567	1	0.981	0	0	RPL13A
0	0.307004	0.999	0.959	0	0	RPL17
0	0.296277	0.999	0.972	0	0	RPL7A
0	0.283469	0.999	0.964	0	0	RPL23A
0	0.27224	0.999	0.972	0	0	RPLP0
1.91855e-305	0.274858	0.996	0.96	6.75712e-301	0	EEF1B2
1.67412e-301	0.415241	0.355	0.163	5.89626e-297	0	PRDX2
8.76254e-298	0.522259	0.597	0.414	3.08617e-293	0	RELL1
3.33814e-294	0.370375	0.943	0.882	1.17569e-289	0	SRSF5
1.56185e-293	0.410261	0.721	0.557	5.50085e-289	0	TMEM243
3.11824e-285	0.402979	0.704	0.507	1.09824e-280	0	DGKA
9.20145e-284	0.425051	0.621	0.416	3.24075e-279	0	FCMR
1.32203e-283	0.542335	0.474	0.263	4.65617e-279	0	BMPR1B
4.37392e-282	0.353054	0.917	0.831	1.5405e-277	0	UBE2D2
6.80758e-281	0.330152	0.911	0.667	2.39763e-276	0	PAG1
1.04506e-280	0.447161	0.826	0.677	3.68071e-276	0	RHOH
8.24949e-277	0.454996	0.615	0.426	2.90547e-272	0	ANKH
2.41492e-275	0.443318	0.581	0.406	8.50535e-271	0	PIK3IP1
3.17892e-272	0.439955	0.463	0.271	1.11962e-267	0	SPTBN1
3.22217e-272	0.412537	0.724	0.576	1.13485e-267	0	KRAS
2.17237e-261	0.440737	0.7	0.557	7.65108e-257	0	LOC114679035
2.27156e-259	0.381524	0.805	0.64	8.00044e-255	0	MAP4K4
5.76765e-257	0.289809	0.993	0.948	2.03137e-252	0	RPL4
2.1089e-255	0.448789	0.382	0.197	7.42755e-251	0	GPR155
7.46633e-249	0.367761	0.771	0.553	2.62964e-244	0	TXK
3.86292e-248	0.366137	0.629	0.452	1.36052e-243	0	HPCAL1
7.30673e-247	0.34091	0.891	0.785	2.57343e-242	0	PABPC1
6.26746e-246	0.381695	0.849	0.747	2.2074e-241	0	LOC107000401
3.04727e-244	0.582629	0.762	0.685	1.07325e-239	0	LOC697476
2.31044e-240	0.40696	0.496	0.3	8.13736e-236	0	PATJ
6.78207e-240	0.31362	0.945	0.868	2.38865e-235	0	ARID1B
1.51826e-239	0.302709	0.946	0.877	5.34732e-235	0	CD247
2.18752e-236	0.423219	0.359	0.183	7.70443e-232	0	RALGPS2
5.30223e-236	0.452412	0.449	0.27	1.86744e-231	0	LOC106993394
1.02403e-231	0.369935	0.818	0.711	3.60662e-227	0	RPL39
2.95869e-231	0.406701	0.832	0.703	1.04205e-226	0	MLLT3
1.8248e-229	0.309343	0.927	0.813	6.42696e-225	0	DOCK10
3.91308e-229	0.37571	0.701	0.557	1.37819e-224	0	PIK3CD
3.07764e-228	0.354877	0.721	0.587	1.08395e-223	0	GYPC
3.5059e-223	0.386285	0.567	0.412	1.23478e-218	0	DYRK2
1.8598e-220	0.391336	0.321	0.161	6.55022e-216	0	MYC
2.21297e-217	0.401866	0.458	0.295	7.79408e-213	0	MLXIP
7.82431e-215	0.355764	0.908	0.809	2.75572e-210	0	ATP10A
1.24694e-212	0.37865	0.408	0.245	4.39171e-208	0	LOC100430028
1.18283e-209	0.294271	0.782	0.619	4.16593e-205	0	RPL22L1
3.34976e-208	0.510143	0.971	0.911	1.17978e-203	0	EEF1A1
6.34969e-207	0.291111	0.874	0.727	2.23636e-202	0	DIP2B
2.13558e-206	0.320311	0.902	0.825	7.52151e-202	0	HNRNPA1
1.78062e-203	0.3116	0.869	0.792	6.27133e-199	0	TOMM20
3.65338e-200	0.378123	0.552	0.4	1.28672e-195	0	MGAT4A
5.14895e-200	0.354945	0.684	0.56	1.81346e-195	0	CHD3
2.54067e-199	0.53363	0.465	0.311	8.94823e-195	0	CHMP7
7.48098e-199	0.376483	0.387	0.236	2.6348e-194	0	FUOM
1.2882e-198	0.264512	0.998	0.952	4.53703e-194	0	RPL35
4.43725e-197	0.367772	0.399	0.234	1.5628e-192	0	IFNGR2
2.86697e-195	0.296444	0.903	0.831	1.00975e-190	0	PNRC1
3.07257e-195	0.366192	0.609	0.459	1.08216e-190	0	HACE1
9.82334e-194	0.370049	0.71	0.585	3.45978e-189	0	DTNBP1
2.73341e-192	0.307005	0.922	0.833	9.62705e-188	0	TNFAIP8
6.51677e-190	0.386739	0.839	0.719	2.2952e-185	0	SSBP2
1.07702e-188	0.427619	0.745	0.633	3.79326e-184	0	LOC114674318
5.07995e-188	0.265034	0.927	0.831	1.78916e-183	0	NCOA3
2.12402e-186	0.406614	0.508	0.339	7.48078e-182	0	FAM117B
2.7605e-184	0.441171	0.499	0.348	9.7225e-180	0	LPAR6
3.587e-182	0.358215	0.429	0.284	1.26334e-177	0	LOC114678346
3.70204e-182	0.392284	0.634	0.5	1.30386e-177	0	MAN2A1
2.62215e-181	0.332942	0.704	0.536	9.23519e-177	0	ZEB1
6.17611e-181	0.32086	0.837	0.748	2.17523e-176	0	ERBIN
1.14808e-175	0.356802	0.537	0.394	4.04355e-171	0	PDCD4
5.99382e-173	0.333728	0.455	0.296	2.11102e-168	0	TNFSF8
3.63792e-172	0.40364	0.378	0.225	1.28128e-167	0	SCMH1
1.41361e-171	0.289461	0.787	0.665	4.97873e-167	0	CYLD
1.16081e-170	0.340191	0.385	0.243	4.08836e-166	0	TMEM204
1.77694e-170	0.349828	0.441	0.286	6.25837e-166	0	GLCE
9.52572e-169	0.475288	0.615	0.509	3.35496e-164	0	LOC698383
1.47745e-167	0.388349	0.297	0.162	5.20358e-163	0	LOC106997195
1.58261e-167	0.339546	0.469	0.333	5.57394e-163	0	GTF2E2
5.09628e-166	0.274867	0.898	0.818	1.79491e-161	0	CCNI
2.11994e-165	0.301792	0.698	0.595	7.46643e-161	0	C3H7orf50
6.57376e-164	0.339637	0.54	0.403	2.31528e-159	0	OTUD5
3.28153e-163	0.318759	0.506	0.373	1.15576e-158	0	RPS27A
6.41534e-162	0.299509	0.668	0.532	2.25948e-157	0	TMEM123
1.94397e-159	0.323185	0.396	0.254	6.84667e-155	0	TRIM44
3.683e-158	0.302242	0.266	0.14	1.29715e-153	0	HSBP1L1
4.56479e-157	0.312573	0.476	0.342	1.60772e-152	0	GRAP
9.06341e-157	0.276063	0.266	0.139	3.19213e-152	0	BEX4
2.04911e-155	0.291074	0.743	0.651	7.21696e-151	0	EIF4B
8.71298e-155	0.311448	0.27	0.144	3.06871e-150	0	FBXW8
2.3018e-153	0.286048	0.81	0.713	8.10694e-149	0	RASA2
4.82134e-153	0.336705	0.449	0.305	1.69808e-148	0	KIAA0355
7.18406e-153	0.289785	0.25	0.13	2.53023e-148	0	NPM3
1.49646e-152	0.329272	0.36	0.223	5.27052e-148	0	APBA2
1.49728e-150	0.316534	0.615	0.502	5.27342e-146	0	ZMYND8
3.30093e-150	0.323142	0.396	0.261	1.16259e-145	0	DNMT3A
2.84543e-148	0.254425	0.659	0.513	1.00216e-143	0	AOPEP
8.39184e-147	0.33749	0.627	0.517	2.9556e-142	0	LOC114677679
9.73442e-145	0.27832	0.282	0.157	3.42846e-140	0	RIN3
3.41377e-144	0.321127	0.254	0.133	1.20233e-139	0	GPR160
1.973e-143	0.305686	0.301	0.175	6.9489e-139	0	PPFIBP2
4.82449e-142	0.322549	0.619	0.519	1.69919e-137	0	PPP1R2
7.12295e-142	0.304183	0.254	0.134	2.5087e-137	0	SCML1
5.0029e-141	0.364021	0.269	0.147	1.76202e-136	0	PRKN
8.49502e-141	0.287221	0.564	0.444	2.99194e-136	0	UBALD2
2.99904e-138	0.283239	0.847	0.781	1.05626e-133	0	SARAF
6.95009e-138	0.273519	0.898	0.809	2.44782e-133	0	SCML4
1.60387e-137	0.293507	0.317	0.197	5.64881e-133	0	LDLRAP1
2.92321e-136	0.274915	0.688	0.595	1.02956e-131	0	EIF3M
1.22298e-133	0.266649	0.759	0.676	4.30733e-129	0	LOC705400
1.69005e-131	0.332501	0.281	0.164	5.95235e-127	0	FAM184A
1.394e-130	0.319632	0.543	0.431	4.90967e-126	0	ECHDC1
2.50134e-130	0.258194	0.771	0.695	8.80971e-126	0	SEC62
3.13666e-129	0.28472	0.688	0.57	1.10473e-124	0	SLC12A6
2.13148e-128	0.292553	0.414	0.285	7.50709e-124	0	HIPK2
5.3276e-128	0.33879	0.393	0.278	1.87638e-123	0	FBXO25
1.88903e-127	0.278455	0.385	0.256	6.65318e-123	0	LDLRAD4
6.98774e-126	0.28165	0.437	0.297	2.46108e-121	0	APP
1.59056e-125	0.271453	0.774	0.705	5.60196e-121	0	NPM1
2.59614e-125	0.29116	0.552	0.452	9.14361e-121	0	LOC693947
6.10902e-125	0.272525	0.261	0.153	2.1516e-120	0	CDIP1
7.47598e-125	0.268066	0.273	0.154	2.63304e-120	0	SNX9
3.78877e-124	0.271531	0.326	0.204	1.3344e-119	0	ZNF618
3.92627e-124	0.33174	0.405	0.285	1.38283e-119	0	KANSL1L
4.87253e-124	0.265012	0.756	0.676	1.71611e-119	0	SP110
5.87984e-124	0.252756	0.811	0.742	2.07088e-119	0	NOP53
1.98602e-121	0.294956	0.375	0.263	6.99475e-117	0	LOC706496
5.18886e-121	0.268972	0.269	0.161	1.82752e-116	0	LOC106993990
6.09296e-121	0.250977	0.739	0.642	2.14594e-116	0	ITPR2
9.42825e-121	0.289615	0.549	0.451	3.32063e-116	0	HMOX2
1.12356e-118	0.278584	0.509	0.376	3.95716e-114	0	ERC1
7.56253e-118	0.315175	0.283	0.171	2.66352e-113	0	TMEM38B
1.23785e-117	0.292418	0.36	0.237	4.35972e-113	0	ZFYVE9
3.58756e-116	0.351214	0.292	0.18	1.26354e-111	0	FAM241A
4.03329e-116	0.285953	0.677	0.553	1.42053e-111	0	THEMIS
4.3616e-113	0.290634	0.395	0.274	1.53616e-108	0	SFMBT2
5.05312e-113	0.264469	0.405	0.3	1.77971e-108	0	SYPL1
2.83999e-111	0.297052	0.398	0.281	1.00025e-106	0	SFMBT1
4.45463e-111	0.277704	0.405	0.295	1.56892e-106	0	DENND2D
1.29731e-110	0.295127	0.428	0.318	4.56912e-106	0	RFTN1
8.53442e-108	0.254761	0.508	0.407	3.00582e-103	0	DDT
1.17388e-106	0.25718	0.423	0.3	4.13441e-102	0	CHD7
4.78483e-105	0.274928	0.438	0.325	1.68522e-100	0	MRTFB
3.53243e-103	0.290482	0.64	0.536	1.24412e-98	0	EXOC6
1.51768e-101	0.2599	0.495	0.386	5.34529e-97	0	PTGER4
1.14557e-98	0.26633	0.513	0.407	4.03471e-94	0	CUX1
5.56184e-94	0.253672	0.309	0.214	1.95888e-89	0	LOC699779
1.80547e-92	0.252988	0.333	0.235	6.35885e-88	0	DGKD
1.15869e-91	0.314924	0.32	0.217	4.08092e-87	0	RNF24
3.12649e-91	0.250288	0.658	0.586	1.10115e-86	0	LOC702847
7.77198e-91	0.258431	0.784	0.693	2.73729e-86	0	MPP7
4.20325e-89	0.303507	0.37	0.273	1.48038e-84	0	LOC114677645
2.70646e-86	0.251488	0.318	0.227	9.53216e-82	0	LDHB
1.96813e-83	0.268612	0.468	0.368	6.93176e-79	0	DENND5A
2.2621e-81	0.252236	0.585	0.506	7.96711e-77	0	STMN3
1.27457e-79	0.326817	1	0.998	4.48903e-75	0	LOC109910387
1.50095e-79	0.262948	0.393	0.305	5.28633e-75	0	S1PR1
1.13405e-77	0.263153	0.386	0.299	3.99412e-73	0	IRAK2
8.94493e-75	0.267967	0.682	0.63	3.15041e-70	0	LOC114674108
1.56456e-74	0.495206	0.579	0.536	5.51038e-70	0	LOC114672793
2.66962e-72	0.256983	0.55	0.465	9.40239e-68	0	SCFD2
8.46657e-72	0.275048	0.41	0.309	2.98193e-67	0	FHIT
8.74758e-67	0.288285	0.26	0.182	3.0809e-62	0	SUGCT
2.60814e-59	0.263961	0.318	0.241	9.18589e-55	0	PATL2
3.05432e-59	0.306859	0.731	0.676	1.07573e-54	0	JUNB
9.95939e-51	0.358803	0.494	0.444	3.5077e-46	0	LOC705327
2.78945e-39	0.261057	0.507	0.465	9.82444e-35	0	NUMB

## Sheet: Cluster 1
p_val	avg_log2FC	pct.1	pct.2	p_val_adj	cluster	gene
0	2.05893	0.726	0.332	0	1	ITGB1
0	1.50497	0.528	0.165	0	1	TSHZ2
0	1.41467	0.727	0.19	0	1	SYNE2
0	1.18761	0.965	0.739	0	1	INPP4B
0	1.14369	0.465	0.067	0	1	CR1
0	1.0895	0.705	0.311	0	1	BICDL1
0	1.03459	0.881	0.552	0	1	MAP3K5
0	1.02767	0.835	0.517	0	1	SLC9A9
0	1.0153	0.641	0.273	0	1	MFHAS1
0	1.00453	0.778	0.347	0	1	GPR183
0	0.987103	0.81	0.375	0	1	LOC106993196
0	0.975257	0.694	0.315	0	1	ICOS
0	0.957674	0.281	0.031	0	1	ADAM19
0	0.957654	0.778	0.412	0	1	LIMS1
0	0.951932	0.827	0.564	0	1	NCOA7
0	0.916379	0.619	0.208	0	1	ZC3H12D
0	0.904565	0.845	0.499	0	1	CAPG
0	0.903678	0.256	0.057	0	1	MTSS1
0	0.870764	0.352	0.083	0	1	ALCAM
0	0.850882	0.507	0.172	0	1	MAF
0	0.844555	0.865	0.571	0	1	TAB2
0	0.825238	0.737	0.418	0	1	TMEM156
0	0.824794	0.854	0.524	0	1	LOC106999943
0	0.821339	0.808	0.571	0	1	S100A6
0	0.784212	0.631	0.325	0	1	PHACTR2
0	0.767027	0.531	0.226	0	1	DAAM1
0	0.765321	0.904	0.703	0	1	SIK3
0	0.743419	0.253	0.032	0	1	REELD1
0	0.733264	0.659	0.304	0	1	KCNA3
0	0.73241	0.455	0.101	0	1	RTKN2
0	0.724108	0.306	0.107	0	1	FRMD4B
0	0.720689	0.43	0.175	0	1	FOS
0	0.716784	0.847	0.557	0	1	KLF6
0	0.716252	0.77	0.425	0	1	IL6R
0	0.714978	0.931	0.732	0	1	AKT3
0	0.675248	0.958	0.751	0	1	IQGAP2
0	0.671537	0.935	0.812	0	1	CDC14A
0	0.6667	0.762	0.398	0	1	ATXN1
0	0.650219	0.934	0.766	0	1	ARHGEF3
0	0.637871	0.609	0.306	0	1	GPRIN3
0	0.622849	0.257	0.066	0	1	SOCS2
0	0.610807	0.945	0.796	0	1	VIM
0	0.60895	0.373	0.118	0	1	LOC106994308
0	0.602001	0.99	0.907	0	1	ANKRD12
0	0.599392	0.519	0.243	0	1	TNFSF10
0	0.587037	0.256	0.032	0	1	CYSLTR2
0	0.584445	0.89	0.67	0	1	ARID5B
0	0.580955	0.418	0.155	0	1	ZNF831
0	0.568438	0.8	0.507	0	1	ANXA1
0	0.566115	0.254	0.036	0	1	AHR
0	0.559471	0.889	0.695	0	1	MAP3K1
0	0.556047	0.999	0.973	0	1	SKAP1
0	0.554966	0.324	0.089	0	1	RFK
0	0.545161	0.996	0.861	0	1	LTB
0	0.539618	0.357	0.11	0	1	STAMBPL1
0	0.535203	0.847	0.551	0	1	PLAAT3
0	0.534566	0.981	0.903	0	1	CYTH1
0	0.5275	0.95	0.802	0	1	CRIP1
0	0.514268	0.254	0.071	0	1	GIPC2
0	0.495112	0.322	0.102	0	1	CTSL
0	0.449729	1	0.989	0	1	MBNL1
4.29234e-305	0.765944	0.927	0.829	1.51176e-300	1	SOS1
3.55438e-303	0.548569	0.501	0.242	1.25185e-298	1	APOL2
3.41485e-298	0.536423	0.846	0.575	1.20271e-293	1	CD44
1.19381e-297	0.641424	0.66	0.401	4.20461e-293	1	WDFY2
8.27649e-289	0.58275	0.808	0.602	2.91498e-284	1	MGAT5
5.21774e-279	0.602359	0.703	0.455	1.83769e-274	1	CRYBG1
3.65829e-273	0.57527	0.784	0.56	1.28845e-268	1	LRRFIP1
1.76348e-269	0.492659	0.942	0.822	6.21097e-265	1	ELMO1
3.30025e-269	0.522479	0.569	0.313	1.16235e-264	1	WDFY1
2.02732e-263	0.485956	0.927	0.822	7.14023e-259	1	ESYT2
1.97991e-261	0.477041	0.58	0.307	6.97323e-257	1	CD28
3.95803e-260	0.627415	0.899	0.775	1.39402e-255	1	ZCCHC7
4.17523e-260	0.528278	0.819	0.608	1.47052e-255	1	STAT5B
2.76976e-259	0.550465	0.47	0.234	9.7551e-255	1	GATA3
1.0732e-256	0.542482	0.461	0.224	3.7798e-252	1	DPEP2
1.75782e-255	0.556673	0.695	0.452	6.19103e-251	1	LRIG1
2.22765e-253	0.590799	0.713	0.469	7.84578e-249	1	CHN2
1.54604e-252	0.536945	0.38	0.168	5.44515e-248	1	RUNX2
7.46187e-251	0.411766	0.335	0.133	2.62807e-246	1	ECE1
9.85485e-251	0.552677	0.695	0.436	3.47088e-246	1	PCNX2
1.83504e-236	0.678433	0.52	0.297	6.46301e-232	1	GNAQ
1.90153e-235	0.439117	0.949	0.849	6.6972e-231	1	FYN
2.64955e-230	0.541253	0.914	0.78	9.33172e-226	1	BCL2
7.76653e-229	0.473208	0.853	0.634	2.73537e-224	1	TC2N
5.99199e-228	0.39227	0.344	0.145	2.11038e-223	1	KLF8
5.20926e-227	0.44177	0.306	0.122	1.8347e-222	1	CCDC50
3.3301e-225	0.516314	0.455	0.234	1.17286e-220	1	GRAMD1B
2.89364e-222	0.371963	0.774	0.484	1.01914e-217	1	ANXA2
3.41439e-222	0.521285	0.551	0.317	1.20255e-217	1	AMMECR1
5.16502e-217	0.409695	0.26	0.095	1.81912e-212	1	FOSB
5.4156e-216	0.641149	0.411	0.203	1.90737e-211	1	SESN3
6.09804e-216	0.482602	0.388	0.184	2.14773e-211	1	LRRC8D
3.01932e-214	0.49033	0.355	0.163	1.06341e-209	1	LPGAT1
8.16203e-214	0.420565	0.34	0.148	2.87467e-209	1	SLC25A13
2.01649e-211	0.499161	0.704	0.484	7.10208e-207	1	TANK
2.45208e-211	0.424327	0.839	0.611	8.63622e-207	1	SPOCK2
2.69996e-210	0.45838	0.98	0.927	9.50926e-206	1	LOC708686
1.31485e-207	0.505307	0.487	0.264	4.6309e-203	1	CISH
4.59649e-207	0.335984	0.272	0.104	1.61888e-202	1	UPP1
4.98166e-204	0.476876	0.861	0.692	1.75454e-199	1	TAGLN2
7.76527e-204	0.45127	0.511	0.288	2.73493e-199	1	CA5B
1.06346e-203	0.418995	0.486	0.266	3.74551e-199	1	CLDND1
1.27716e-203	0.449606	0.562	0.332	4.49817e-199	1	SYNE3
2.95833e-202	0.468486	0.893	0.739	1.04193e-197	1	TLK1
6.39593e-202	0.371814	0.991	0.953	2.25265e-197	1	CDC42SE2
7.63521e-198	0.466454	0.604	0.38	2.68912e-193	1	ELOVL5
8.85956e-198	0.390147	0.395	0.191	3.12034e-193	1	TRIB2
3.88717e-194	0.402235	0.769	0.528	1.36906e-189	1	ATP2B4
4.41546e-194	0.472003	0.651	0.43	1.55513e-189	1	CLINT1
2.04659e-193	0.268283	0.999	0.985	7.20809e-189	1	ARHGAP15
2.05587e-191	0.453539	0.414	0.213	7.24076e-187	1	PDLIM5
2.43266e-191	0.426694	0.557	0.335	8.56783e-187	1	SMCO4
2.22087e-190	0.403945	0.534	0.308	7.82191e-186	1	PLP2
6.31583e-190	0.475357	0.794	0.616	2.22444e-185	1	SLC38A1
3.98135e-189	0.446011	0.66	0.436	1.40223e-184	1	TTC39C
1.38716e-188	0.404343	0.369	0.18	4.88557e-184	1	HNRNPLL
2.52698e-185	0.633473	0.654	0.457	8.90001e-181	1	JAZF1
7.95972e-183	0.524922	0.334	0.159	2.80341e-178	1	RFX2
1.34406e-182	0.443085	0.392	0.198	4.73377e-178	1	AGPAT4
3.735e-182	0.436689	0.621	0.403	1.31547e-177	1	RSBN1
4.34455e-176	0.402597	0.887	0.76	1.53015e-171	1	PRKCB
1.07424e-174	0.424456	0.64	0.423	3.78348e-170	1	NFKB1
5.88514e-174	0.387649	0.453	0.248	2.07274e-169	1	TIAM1
5.4006e-173	0.530774	0.743	0.574	1.90209e-168	1	FGFR1OP2
2.7863e-172	0.381766	0.976	0.905	9.81334e-168	1	KLF12
1.08108e-170	0.45712	0.806	0.643	3.80757e-166	1	MALT1
3.23797e-170	0.408808	0.769	0.575	1.14041e-165	1	FLT3LG
3.33485e-170	0.389071	0.335	0.163	1.17453e-165	1	RFFL
5.00895e-169	0.416202	0.839	0.664	1.76415e-164	1	CCDC91
6.98521e-169	0.451575	0.505	0.301	2.46019e-164	1	GLUD1
7.88899e-168	0.44424	0.598	0.387	2.7785e-163	1	NFKBIZ
2.52003e-167	0.47144	0.833	0.68	8.87556e-163	1	EXOC6B
2.89119e-167	0.423068	0.818	0.663	1.01828e-162	1	FAM107B
1.72023e-166	0.382479	0.545	0.33	6.05864e-162	1	RALGDS
6.85778e-166	0.489329	0.743	0.564	2.41531e-161	1	REV3L
2.2156e-165	0.541151	0.458	0.249	7.80333e-161	1	LOC106992647
7.53916e-164	0.425837	0.639	0.43	2.65529e-159	1	ICAM2
2.03881e-162	0.424545	0.72	0.531	7.18069e-158	1	TSPO
7.81016e-162	0.376821	0.838	0.68	2.75074e-157	1	PPP1CC
1.71535e-161	0.358841	0.477	0.27	6.04147e-157	1	LST1
2.33008e-160	0.358728	0.503	0.297	8.20654e-156	1	TNFRSF25
4.98522e-160	0.355565	0.303	0.143	1.75579e-155	1	PHTF1
6.66151e-160	0.363436	0.285	0.131	2.34618e-155	1	RAB11FIP1
3.53168e-159	0.348907	0.987	0.943	1.24386e-154	1	FNBP1
1.24487e-158	0.543114	0.582	0.393	4.38443e-154	1	CMTM6
2.38385e-158	0.312266	0.404	0.213	8.39592e-154	1	ATP8B2
2.44992e-158	0.29237	0.286	0.13	8.62863e-154	1	RNASE4
7.14395e-158	0.333671	0.254	0.108	2.5161e-153	1	ANKRD6
6.61487e-156	0.45438	0.761	0.584	2.32976e-151	1	EZR
3.12348e-154	0.47427	0.564	0.372	1.10009e-149	1	RBPJ
4.3042e-154	0.370597	0.69	0.48	1.51594e-149	1	STK39
1.11386e-153	0.392017	0.743	0.556	3.92301e-149	1	ALDOA
1.15385e-153	0.396988	0.536	0.336	4.06386e-149	1	CDC25B
2.39815e-153	0.347017	0.921	0.764	8.4463e-149	1	PAG1
1.58542e-151	0.506696	0.815	0.675	5.58386e-147	1	MSI2
2.56496e-149	0.350699	0.976	0.886	9.03378e-145	1	IL7R
7.06078e-149	0.35173	0.953	0.884	2.48681e-144	1	MYCBP2
1.56017e-148	0.328384	0.912	0.778	5.4949e-144	1	DIP2B
7.82294e-148	0.317709	0.706	0.472	2.75524e-143	1	AHNAK
1.27606e-146	0.345698	0.279	0.131	4.49427e-142	1	TMEM65
3.72981e-145	0.408204	0.685	0.489	1.31364e-140	1	MDFIC
1.13625e-143	0.388471	0.698	0.517	4.00186e-139	1	CYB5A
2.82266e-141	0.308583	0.94	0.842	9.9414e-137	1	ATP10A
5.77818e-140	0.355467	0.464	0.275	2.03508e-135	1	SOCS1
7.48669e-140	0.330696	0.405	0.228	2.63681e-135	1	IVNS1ABP
2.14371e-139	0.318321	0.83	0.622	7.55014e-135	1	LRRC8C
2.70614e-137	0.648613	0.758	0.76	9.53101e-133	1	ITGA4
3.88636e-137	0.301897	0.418	0.235	1.36878e-132	1	R3HDM4
2.61805e-136	0.393375	0.743	0.571	9.22079e-132	1	STK24
2.75049e-136	0.326664	0.778	0.608	9.68723e-132	1	COTL1
3.07111e-136	0.328081	0.474	0.282	1.08164e-131	1	ADSL
1.12899e-135	0.36396	0.736	0.552	3.9763e-131	1	OSTF1
2.7701e-134	0.361332	0.549	0.355	9.75628e-130	1	TMEM164
4.45009e-133	0.386073	0.836	0.695	1.56732e-128	1	RFX3
4.90374e-133	0.322017	0.946	0.854	1.7271e-128	1	DOCK10
2.57196e-131	0.341763	0.856	0.714	9.05846e-127	1	TMEM131L
1.12521e-130	0.336959	0.444	0.263	3.96299e-126	1	MT2A
1.36174e-130	0.306477	0.42	0.244	4.79604e-126	1	CASP8AP2
1.91294e-129	0.372182	0.862	0.732	6.73737e-125	1	HIVEP2
2.28264e-129	0.290438	0.339	0.18	8.03947e-125	1	EVI2B
3.46201e-127	0.356857	0.653	0.466	1.21932e-122	1	FAM117A
4.68606e-127	0.313663	0.404	0.233	1.65043e-122	1	IFNAR1
1.07363e-126	0.295214	0.394	0.221	3.78134e-122	1	SIPA1L2
9.85675e-126	0.329141	0.629	0.432	3.47155e-121	1	IL10RB
3.08405e-125	0.395183	0.725	0.561	1.0862e-120	1	PDE4B
7.29573e-125	0.269019	0.974	0.933	2.56955e-120	1	HINT1
2.6607e-122	0.265815	0.986	0.955	9.37099e-118	1	LOC703365
3.75555e-122	0.359381	0.612	0.425	1.32271e-117	1	NFATC2
4.31521e-122	0.368405	0.427	0.258	1.51982e-117	1	GALM
2.32327e-121	0.511068	0.767	0.639	8.18254e-117	1	DENND4A
1.17227e-120	0.263176	0.254	0.123	4.12873e-116	1	MT1M
4.6089e-119	0.305484	0.254	0.122	1.62326e-114	1	MAGI3
1.13273e-117	0.342046	0.417	0.255	3.98947e-113	1	LPIN2
1.49445e-117	0.361078	0.453	0.285	5.26346e-113	1	MYADM
2.09452e-117	0.355378	0.53	0.352	7.37691e-113	1	LMBR1
9.78648e-117	0.319524	0.589	0.402	3.4468e-112	1	PBXIP1
1.53081e-116	0.258394	0.278	0.142	5.39152e-112	1	CDYL2
1.65347e-116	0.309987	0.866	0.748	5.82352e-112	1	KMT2A
2.51824e-116	0.27724	0.958	0.88	8.86922e-112	1	MYL12A
1.27912e-114	0.460775	0.738	0.591	4.50506e-110	1	RORA
2.1373e-114	0.308298	0.301	0.16	7.52756e-110	1	GLB1
6.98835e-113	0.309731	0.641	0.463	2.4613e-108	1	RASA3
6.52154e-112	0.269318	0.953	0.881	2.29688e-107	1	STK4
1.32203e-111	0.314915	0.543	0.366	4.65619e-107	1	PPIL4
1.64878e-111	0.282012	0.963	0.91	5.807e-107	1	STK17A
1.33386e-110	0.296209	0.85	0.7	4.69787e-106	1	CYLD
1.52975e-110	0.302439	0.866	0.731	5.38778e-106	1	PPP3CC
6.18412e-110	0.311392	0.378	0.222	2.17805e-105	1	PHTF2
1.16245e-109	0.32813	0.733	0.568	4.09415e-105	1	SAMHD1
1.4408e-108	0.310822	0.471	0.304	5.07451e-104	1	NDUFV2
2.91677e-108	0.327495	0.503	0.333	1.02729e-103	1	NBEAL1
4.69247e-108	0.48956	0.712	0.564	1.65269e-103	1	ADGRE5
1.89978e-107	0.44837	0.643	0.487	6.69104e-103	1	JUN
2.11001e-107	0.501819	0.483	0.324	7.43144e-103	1	PDZRN3
1.26153e-106	0.344297	0.512	0.344	4.44312e-102	1	CLYBL
5.75544e-106	0.283863	0.486	0.308	2.02707e-101	1	TMTC2
1.66799e-105	0.314864	0.5	0.329	5.87467e-101	1	PPP1R16B
2.04177e-105	0.279622	0.401	0.24	7.19113e-101	1	KLF7
2.32905e-105	0.271374	0.436	0.271	8.20291e-101	1	MVP
7.94544e-105	0.296076	0.515	0.335	2.79838e-100	1	APP
1.24073e-104	0.289287	0.423	0.26	4.36984e-100	1	LOC114679625
2.82941e-104	0.305619	0.675	0.497	9.96517e-100	1	TAGAP
2.19402e-103	0.28828	0.546	0.37	7.72735e-99	1	ESYT1
2.19696e-103	0.307001	0.769	0.614	7.73771e-99	1	SMC5
5.25589e-103	0.31041	0.65	0.475	1.85112e-98	1	ME2
6.17157e-103	0.308632	0.502	0.331	2.17363e-98	1	CHD7
4.31962e-102	0.276026	0.404	0.245	1.52137e-97	1	NABP1
1.85895e-101	0.357239	0.473	0.31	6.54721e-97	1	CYSLTR1
1.03196e-100	0.297752	0.813	0.66	3.63456e-96	1	CHST11
1.3526e-100	0.296285	0.878	0.762	4.76387e-96	1	NSD3
3.62453e-100	0.359735	0.616	0.459	1.27656e-95	1	RSU1
2.06853e-99	0.295987	0.295	0.165	7.28537e-95	1	LOC107000013
5.73779e-99	0.328377	0.367	0.222	2.02085e-94	1	SHLD2
1.50139e-98	0.335482	0.321	0.184	5.2879e-94	1	ADAM23
4.89965e-98	0.393245	0.654	0.501	1.72566e-93	1	SUPT3H
1.94728e-97	0.289878	0.361	0.214	6.85831e-93	1	WDR60
1.16921e-96	0.324295	0.692	0.532	4.11797e-92	1	RPS6KA3
1.24063e-95	0.282215	0.606	0.436	4.36951e-91	1	SPINT2
1.1273e-93	0.300371	0.837	0.723	3.97035e-89	1	TBL1XR1
7.7942e-93	0.338882	0.466	0.31	2.74512e-88	1	DUSP1
1.22214e-92	0.366023	0.524	0.37	4.30438e-88	1	EVA1C
5.80105e-91	0.262657	0.92	0.818	2.04313e-86	1	RAPGEF6
1.35516e-90	0.275366	0.278	0.155	4.77286e-86	1	DOCK9
2.04485e-89	0.388946	0.499	0.354	7.20197e-85	1	ANTXR2
2.32354e-89	0.266237	0.802	0.634	8.1835e-85	1	TXK
2.43838e-88	0.279457	0.688	0.526	8.58797e-84	1	WWP1
6.71889e-87	0.344988	0.778	0.669	2.36639e-82	1	MAMU-A3
6.98005e-87	0.267691	0.415	0.267	2.45837e-82	1	SUFU
1.65122e-86	0.26719	0.871	0.762	5.81561e-82	1	ARHGEF18
2.42819e-86	0.261083	0.517	0.346	8.55209e-82	1	TNFSF8
7.8416e-86	0.286291	0.702	0.555	2.76181e-81	1	GNB1
8.39237e-86	0.255076	0.324	0.194	2.95579e-81	1	PLEKHF2
1.76557e-85	0.299065	0.637	0.481	6.21832e-81	1	CARD11
4.3273e-83	0.329451	0.541	0.393	1.52407e-78	1	ETV6
1.73911e-82	0.279267	0.521	0.37	6.12516e-78	1	CCND2
3.78789e-82	0.279675	0.878	0.772	1.33409e-77	1	ZNF609
3.45525e-80	0.262984	0.852	0.726	1.21694e-75	1	RERE
1.23437e-79	0.264079	0.509	0.357	4.34746e-75	1	ANXA5
9.6781e-78	0.27131	0.501	0.349	3.40863e-73	1	NT5DC1
1.25183e-76	0.274374	0.771	0.639	4.40893e-72	1	ASAP1
1.75015e-76	0.267765	0.567	0.408	6.16403e-72	1	KLHL5
2.5012e-76	0.265783	0.532	0.385	8.80922e-72	1	CREM
5.20308e-76	0.301602	0.649	0.508	1.83253e-71	1	PCNX1
3.97614e-75	0.285107	0.515	0.365	1.4004e-70	1	LOC706619
2.77627e-74	0.31113	0.583	0.442	9.77803e-70	1	COA1
2.8919e-73	0.287173	0.62	0.48	1.01853e-68	1	STT3B
1.62125e-71	0.343827	0.925	0.892	5.71003e-67	1	ITK
1.67257e-71	0.295799	0.534	0.391	5.89079e-67	1	SGMS1
3.17553e-71	0.298006	0.523	0.382	1.11842e-66	1	RPS6KA5
4.35611e-71	0.279934	0.643	0.51	1.53422e-66	1	LSM6
3.87637e-70	0.254815	0.481	0.338	1.36526e-65	1	RNF19A
4.62679e-70	0.326115	0.74	0.612	1.62956e-65	1	IMMP2L
1.20917e-68	0.255434	0.305	0.189	4.2587e-64	1	BAZ2B
1.51397e-68	0.325233	0.775	0.665	5.3322e-64	1	TRPS1
1.57335e-68	0.258172	0.478	0.333	5.54134e-64	1	BIRC3
1.98687e-67	0.265932	0.792	0.683	6.99775e-63	1	RPL22L1
3.9151e-67	0.318832	0.288	0.178	1.3789e-62	1	ADAMTS17
1.22471e-66	0.308558	0.487	0.358	4.31343e-62	1	VPS54
3.46964e-66	0.291846	0.42	0.29	1.22201e-61	1	SESN1
2.4587e-65	0.298297	0.339	0.223	8.65953e-61	1	PPM1L
8.65295e-65	0.366365	0.282	0.18	3.04757e-60	1	NEDD4L
1.00879e-64	0.251763	0.608	0.473	3.55297e-60	1	NUDT3
1.64656e-64	0.290549	0.556	0.421	5.79919e-60	1	PELI1
2.70243e-64	0.262674	0.884	0.801	9.51797e-60	1	CAMK2D
8.89985e-64	0.251834	0.523	0.387	3.13453e-59	1	TRAF3
1.43235e-63	0.271169	0.543	0.411	5.04475e-59	1	MAP2K4
2.87573e-63	0.261541	0.795	0.683	1.01283e-58	1	JUNB
7.97207e-62	0.261421	0.656	0.526	2.80776e-57	1	INTS6
3.5433e-59	0.281286	0.588	0.449	1.24795e-54	1	ST6GALNAC5
1.36189e-58	0.255889	0.547	0.41	4.79658e-54	1	ATP2B1
5.92644e-58	0.263496	0.317	0.208	2.08729e-53	1	CD96
1.19158e-57	0.262488	0.391	0.272	4.19676e-53	1	ARNT
2.51709e-57	0.46594	0.718	0.663	8.86518e-53	1	TOX
8.13754e-57	0.284587	0.569	0.447	2.86604e-52	1	ZFP36
3.48484e-56	0.282805	0.511	0.391	1.22736e-51	1	YPEL5
8.81739e-56	0.252063	0.279	0.182	3.10548e-51	1	LOC694064
1.1598e-52	0.283296	0.504	0.381	4.08481e-48	1	MEMO1
8.30254e-49	0.259362	0.498	0.381	2.92415e-44	1	WWOX
8.83423e-47	0.273567	0.512	0.408	3.11142e-42	1	CERKL
7.8554e-46	0.258514	0.747	0.666	2.76667e-41	1	TRERF1
2.78821e-45	0.2627	0.48	0.372	9.82009e-41	1	MIB1
2.84777e-44	0.275238	0.648	0.553	1.00298e-39	1	ZNF407

## Sheet: Cluster 2
p_val	avg_log2FC	pct.1	pct.2	p_val_adj	cluster	gene
0	2.94709	0.993	0.279	0	2	S100A4
0	2.88867	0.955	0.086	0	2	NKG7
0	2.75464	0.923	0.097	0	2	GZMB
0	2.68832	0.903	0.074	0	2	ZEB2
0	2.66056	0.949	0.113	0	2	TGFBR3
0	2.53218	0.956	0.083	0	2	CST7
0	2.47563	0.843	0.065	0	2	GZMH
0	2.43672	0.89	0.087	0	2	RGS9
0	2.19346	0.654	0.055	0	2	CCL5
0	2.10819	0.918	0.169	0	2	RAP1GAP2
0	2.10054	0.769	0.057	0	2	PPP2R2B
0	2.01757	0.749	0.071	0	2	GNLY
0	2.00537	0.925	0.396	0	2	PARP8
0	1.98831	0.863	0.193	0	2	LOC106992647
0	1.89656	0.995	0.757	0	2	S100A10
0	1.81999	0.819	0.076	0	2	HOPX
0	1.80422	0.79	0.077	0	2	CLIC5
0	1.80178	0.755	0.156	0	2	LOC705095
0	1.78818	0.982	0.633	0	2	HCST
0	1.78252	0.923	0.321	0	2	DNAJC1
0	1.76226	0.922	0.449	0	2	SYTL3
0	1.71546	0.596	0.057	0	2	MAMU-DRA
0	1.69836	0.806	0.166	0	2	SYTL2
0	1.65337	0.676	0.081	0	2	LOC114671905
0	1.64598	0.709	0.071	0	2	JAKMIP2
0	1.64342	0.714	0.051	0	2	CX3CR1
0	1.63622	0.993	0.799	0	2	EML4
0	1.60353	0.683	0.046	0	2	CLEC12A
0	1.58745	0.994	0.934	0	2	SH3BGRL3
0	1.57558	0.607	0.042	0	2	GPR141
0	1.57492	0.945	0.379	0	2	LOC106993196
0	1.56985	0.623	0.134	0	2	CD74
0	1.54833	0.351	0.041	0	2	CACNA1B
0	1.54357	0.941	0.501	0	2	ANXA1
0	1.53612	0.334	0.031	0	2	KLRB1
0	1.52237	0.833	0.238	0	2	MYO1F
0	1.51885	0.736	0.087	0	2	GZMM
0	1.5112	0.657	0.048	0	2	NKG2D
0	1.50406	0.551	0.065	0	2	IL7
0	1.50341	0.905	0.39	0	2	PTPRJ
0	1.49476	0.795	0.235	0	2	RAB27A
0	1.49324	0.648	0.083	0	2	PRF1
0	1.4649	0.916	0.422	0	2	PPP3CA
0	1.46456	0.981	0.691	0	2	S100A11
0	1.46414	0.697	0.095	0	2	LOC114675357
0	1.46228	0.666	0.087	0	2	MAMU-DRB1
0	1.46008	0.994	0.803	0	2	CRIP1
0	1.454	0.941	0.446	0	2	AHNAK
0	1.43081	0.7	0.128	0	2	ADAM23
0	1.41736	0.857	0.458	0	2	PDE3B
0	1.39384	0.926	0.634	0	2	BABAM2
0	1.39304	0.636	0.058	0	2	TPD52
0	1.38642	0.918	0.393	0	2	ATXN1
0	1.37804	0.985	0.765	0	2	PPP1R12A
0	1.37804	0.789	0.225	0	2	TNFRSF1B
0	1.36551	0.689	0.089	0	2	LOC106993126
0	1.36199	0.712	0.155	0	2	CPD
0	1.36004	0.896	0.436	0	2	STAT4
0	1.35812	0.663	0.143	0	2	SNTB1
0	1.33384	0.769	0.132	0	2	C11H12orf75
0	1.31363	0.753	0.148	0	2	LGALS3
0	1.31043	0.958	0.573	0	2	SLCO3A1
0	1.3028	0.804	0.339	0	2	PTPN22
0	1.29496	0.994	0.799	0	2	SRGN
0	1.28972	0.532	0.05	0	2	DOCK5
0	1.27899	0.893	0.461	0	2	LY6E-1
0	1.27591	0.803	0.271	0	2	SSBP4
0	1.25274	0.583	0.052	0	2	LOC114669810
0	1.24809	0.626	0.075	0	2	APOBEC3G
0	1.24456	0.93	0.475	0	2	ANXA2
0	1.24289	0.997	0.983	0	2	CD52
0	1.2383	0.589	0.059	0	2	GOLIM4
0	1.23432	0.499	0.033	0	2	KLRG1
0	1.23129	0.715	0.354	0	2	RAPGEF2
0	1.22903	0.711	0.318	0	2	TTC3
0	1.21353	0.558	0.036	0	2	LOC100430627
0	1.21027	0.73	0.277	0	2	TMTC2
0	1.20189	0.851	0.384	0	2	ITGAL
0	1.19481	0.699	0.19	0	2	SLA2
0	1.19238	0.86	0.553	0	2	CEMIP2
0	1.1809	0.664	0.184	0	2	KAT2B
0	1.17726	0.44	0.039	0	2	MAMU-DQA1
0	1.17567	0.843	0.422	0	2	ITGB2
0	1.15883	0.549	0.048	0	2	PRR5L
0	1.15428	0.951	0.574	0	2	CD44
0	1.13926	0.762	0.298	0	2	ARAP2
0	1.13767	0.92	0.611	0	2	SYNE1
0	1.12149	0.993	0.897	0	2	RAP1B
0	1.12113	0.832	0.431	0	2	AP1S2
0	1.1207	0.566	0.053	0	2	TBX21
0	1.11416	0.862	0.673	0	2	LOC114669738
0	1.11395	0.5	0.036	0	2	SAMD3
0	1.10824	0.676	0.204	0	2	LOC706608
0	1.10319	0.896	0.573	0	2	RORA
0	1.10095	0.518	0.058	0	2	IL18
0	1.09534	0.909	0.519	0	2	ATP2B4
0	1.09393	0.995	0.961	0	2	CD48
0	1.08858	0.766	0.428	0	2	MAPRE2
0	1.08745	0.918	0.58	0	2	FLNA
0	1.07432	0.915	0.627	0	2	CLEC2D
0	1.07151	0.633	0.173	0	2	RUNX3
0	1.0696	0.993	0.909	0	2	RABGAP1L
0	1.06627	0.47	0.051	0	2	FRY
0	1.06571	0.434	0.039	0	2	CLECL1
0	1.05699	0.984	0.852	0	2	SH3KBP1
0	1.0487	0.615	0.205	0	2	GTDC1
0	1.03602	0.778	0.379	0	2	ATP2B1
0	1.03374	0.653	0.19	0	2	DHRS7
0	1.02998	0.98	0.816	0	2	TGFB1
0	1.02744	0.984	0.76	0	2	IQGAP2
0	1.02072	0.726	0.466	0	2	LOC114677644
0	1.01506	0.461	0.039	0	2	MAMU-DPB
0	1.01057	0.686	0.248	0	2	ZBTB38
0	1.00165	0.452	0.042	0	2	KLRF1
0	0.996792	0.937	0.668	0	2	DIAPH1
0	0.983528	0.935	0.699	0	2	PIK3R5
0	0.983124	0.368	0.068	0	2	TNFRSF18
0	0.980029	0.64	0.226	0	2	ARHGAP26
0	0.978619	0.421	0.03	0	2	GALNT3
0	0.977325	0.591	0.156	0	2	APOBEC3H
0	0.974715	0.745	0.345	0	2	GNA13
0	0.965327	0.521	0.125	0	2	HEG1
0	0.963172	0.788	0.432	0	2	ID2
0	0.955645	0.833	0.512	0	2	CD84
0	0.953673	0.715	0.357	0	2	GLCCI1
0	0.952309	0.522	0.086	0	2	PRDM1
0	0.949706	0.548	0.123	0	2	BHLHE40
0	0.949309	0.511	0.097	0	2	APOBEC3C
0	0.948939	0.798	0.435	0	2	CLEC2B
0	0.94591	0.909	0.674	0	2	NR3C1
0	0.943641	0.661	0.231	0	2	TESC
0	0.941137	0.581	0.149	0	2	EFHD2
0	0.935708	0.913	0.582	0	2	GLIPR2
0	0.925986	0.575	0.18	0	2	MAF
0	0.925215	0.398	0.061	0	2	GAS7
0	0.914046	0.529	0.141	0	2	MTMR12
0	0.912892	0.845	0.559	0	2	PRKCA
0	0.911932	0.393	0.051	0	2	LOC106999823
0	0.91155	0.806	0.483	0	2	TMEM50A
0	0.911425	0.796	0.501	0	2	FBXW7
0	0.91113	0.906	0.622	0	2	LRRC8C
0	0.906045	0.879	0.563	0	2	PLAAT3
0	0.903868	0.395	0.029	0	2	CSF1
0	0.900469	0.39	0.044	0	2	DAPK2
0	0.89608	0.837	0.512	0	2	PREX1
0	0.895784	0.577	0.152	0	2	SEPTIN11
0	0.895131	0.379	0.089	0	2	HIP1
0	0.891366	0.56	0.152	0	2	ACTN4
0	0.88657	0.869	0.582	0	2	EPS15
0	0.877253	0.8	0.452	0	2	ISCA1
0	0.87643	0.977	0.819	0	2	EMP3
0	0.87485	0.567	0.176	0	2	SLAMF6
0	0.869953	0.969	0.85	0	2	MYL6
0	0.868736	0.873	0.582	0	2	UCP2
0	0.864278	0.843	0.525	0	2	RNF149
0	0.861776	0.414	0.028	0	2	LOC100426632
0	0.853333	0.411	0.099	0	2	FAM129A
0	0.852541	0.893	0.566	0	2	KLF6
0	0.847694	0.358	0.031	0	2	NHSL2
0	0.846615	0.903	0.657	0	2	ISG20
0	0.845964	0.921	0.69	0	2	PICALM
0	0.845163	0.63	0.296	0	2	CEBPB
0	0.841106	0.675	0.355	0	2	FOXN2
0	0.839924	0.905	0.67	0	2	INPP4A
0	0.83585	0.522	0.187	0	2	AGPAT4
0	0.833963	0.872	0.626	0	2	KLF3
0	0.829862	0.671	0.33	0	2	C6H5orf56
0	0.826425	0.445	0.099	0	2	EMB
0	0.825332	0.827	0.521	0	2	INPP5D
0	0.823458	0.497	0.156	0	2	ADCY9
0	0.822314	0.55	0.196	0	2	TMEM181
0	0.820385	0.697	0.34	0	2	MYO1G
0	0.81985	0.635	0.347	0	2	LOC720132
0	0.819562	0.848	0.644	0	2	ITM2A
0	0.815439	0.693	0.395	0	2	DENND1B
0	0.803861	0.38	0.034	0	2	MCOLN2
0	0.803836	0.943	0.839	0	2	CBLB
0	0.797852	0.361	0.036	0	2	MAMU-DRB5
0	0.795816	0.401	0.046	0	2	TSPAN2
0	0.795587	0.295	0.034	0	2	ST8SIA1
0	0.794215	0.744	0.425	0	2	BST2
0	0.788445	0.892	0.641	0	2	TC2N
0	0.786261	0.476	0.118	0	2	FAS
0	0.785737	0.344	0.027	0	2	CMA1
0	0.785268	0.521	0.153	0	2	CCDC167
0	0.781669	0.796	0.475	0	2	STK39
0	0.781487	0.392	0.036	0	2	RHOC
0	0.778236	0.48	0.145	0	2	USP28
0	0.776371	0.527	0.197	0	2	SPN
0	0.773972	0.741	0.442	0	2	DYNLL1
0	0.773351	0.477	0.181	0	2	ABHD17B
0	0.771109	0.994	0.968	0	2	LOC705671
0	0.770693	0.984	0.88	0	2	PRKCH
0	0.770154	0.444	0.12	0	2	LOC701439
0	0.764895	0.451	0.107	0	2	SH2D2A
0	0.764867	0.283	0.031	0	2	WDR63
0	0.759975	0.894	0.639	0	2	STK10
0	0.758705	0.373	0.049	0	2	GAB3
0	0.75735	0.711	0.381	0	2	CERKL
0	0.75685	0.999	0.997	0	2	B2M
0	0.747316	0.59	0.287	0	2	TMEM154
0	0.747267	0.652	0.338	0	2	MTPN
0	0.746711	0.621	0.276	0	2	MXD4
0	0.744706	0.608	0.278	0	2	SRM
0	0.744478	0.54	0.224	0	2	SNTB2
0	0.743997	0.376	0.059	0	2	JAKMIP1
0	0.743589	0.983	0.891	0	2	ARPC1B
0	0.742825	0.994	0.959	0	2	UBC
0	0.741967	0.62	0.294	0	2	GNAQ
0	0.73951	0.687	0.366	0	2	CD2
0	0.736946	0.99	0.907	0	2	KLF12
0	0.736892	0.311	0.034	0	2	SLCO4C1
0	0.736255	0.349	0.043	0	2	LOC106995333
0	0.731995	0.661	0.324	0	2	ORAI1
0	0.730529	0.737	0.399	0	2	SRI
0	0.728565	0.436	0.132	0	2	GDE1
0	0.726744	0.358	0.06	0	2	MAMU-DQB1
0	0.718924	0.351	0.027	0	2	PLEK
0	0.715237	0.906	0.698	0	2	MSN
0	0.714291	0.608	0.266	0	2	CCDC12
0	0.713662	0.303	0.026	0	2	FGFBP2
0	0.712781	0.538	0.219	0	2	CISD3
0	0.711346	0.512	0.186	0	2	PLEKHG3
0	0.710984	0.995	0.944	0	2	FNBP1
0	0.709026	0.468	0.188	0	2	FNDC3B
0	0.707719	0.754	0.464	0	2	AP2M1
0	0.705272	0.683	0.404	0	2	FAR1
0	0.704376	0.499	0.194	0	2	EED
0	0.704212	0.985	0.919	0	2	ARPC2
0	0.702956	0.971	0.824	0	2	GAPDH
0	0.702701	0.622	0.323	0	2	MADD
0	0.701396	0.483	0.206	0	2	TNFSF4
0	0.700513	0.38	0.1	0	2	SRGAP2
0	0.690545	0.858	0.594	0	2	LCP1
0	0.689903	0.763	0.476	0	2	ATXN7L1
0	0.689669	0.31	0.025	0	2	SLC11A1
0	0.689543	0.458	0.158	0	2	LOC694064
0	0.684983	0.966	0.854	0	2	IFI27L2
0	0.683816	0.998	0.964	0	2	PITPNC1
0	0.683343	0.646	0.331	0	2	CDK2AP2
0	0.682396	0.828	0.603	0	2	RAPGEF1
0	0.6823	0.353	0.047	0	2	MATK
0	0.681957	0.409	0.122	0	2	ZYX
0	0.679801	0.96	0.803	0	2	VIM
0	0.673344	0.491	0.174	0	2	PYCARD
0	0.671721	0.454	0.136	0	2	RASGEF1A
0	0.666888	0.987	0.921	0	2	PFN1
0	0.660578	0.776	0.535	0	2	TLN1
0	0.659865	0.998	0.965	0	2	ANKRD44
0	0.658632	0.577	0.27	0	2	TENT5C
0	0.657688	0.384	0.089	0	2	SH3BP5
0	0.651383	0.483	0.17	0	2	CAPN2
0	0.649674	0.288	0.034	0	2	FAM49A
0	0.64332	0.366	0.074	0	2	ZBP1
0	0.642081	0.982	0.893	0	2	MBP
0	0.642051	0.301	0.059	0	2	SETBP1
0	0.640593	0.298	0.022	0	2	ADGRG1
0	0.638903	0.283	0.051	0	2	SPINK2
0	0.636073	0.986	0.94	0	2	SERF2
0	0.632269	0.877	0.683	0	2	TPM3
0	0.63107	0.352	0.074	0	2	LOC107000617
0	0.626185	0.999	0.991	0	2	PTPRC
0	0.624975	0.431	0.173	0	2	STX4
0	0.622337	0.811	0.55	0	2	OSTF1
0	0.622265	0.929	0.731	0	2	ITGA4
0	0.621977	0.916	0.724	0	2	PSMB9
0	0.618538	0.946	0.8	0	2	MYL12B
0	0.615917	0.967	0.85	0	2	RAC2
0	0.613435	0.572	0.294	0	2	CTSA
0	0.611247	0.719	0.442	0	2	C15H9orf16
0	0.609547	0.732	0.468	0	2	DBI
0	0.602981	0.994	0.962	0	2	LOC707383
0	0.599436	0.283	0.019	0	2	SLAMF7
0	0.596914	0.421	0.15	0	2	CD58
0	0.588066	0.387	0.127	0	2	TXNRD1
0	0.583013	0.28	0.037	0	2	GFI1
0	0.581585	0.265	0.053	0	2	SKAP2
0	0.581397	0.379	0.117	0	2	PXN
0	0.578586	0.609	0.305	0	2	IDH2
0	0.569509	0.31	0.055	0	2	SYT11
0	0.5668	0.378	0.134	0	2	POM121C
0	0.563077	0.988	0.943	0	2	OAZ1
0	0.558566	0.304	0.055	0	2	LOC107000655
0	0.557638	0.251	0.046	0	2	GK5
0	0.553663	0.993	0.969	0	2	CALM1
0	0.552158	0.328	0.076	0	2	VOPP1
0	0.549783	0.919	0.762	0	2	GPX4
0	0.545924	0.956	0.855	0	2	ARPC3
0	0.545699	0.973	0.901	0	2	CD3G
0	0.542706	0.978	0.924	0	2	CORO1A
0	0.541046	0.376	0.099	0	2	PTTG1
0	0.540233	0.271	0.034	0	2	HBA1
0	0.534947	0.261	0.048	0	2	ZFYVE28
0	0.530681	0.984	0.936	0	2	CFL1
0	0.510543	0.293	0.056	0	2	ALOX5AP
0	0.505847	0.994	0.967	0	2	MAMU-AG
0	0.505035	0.353	0.114	0	2	NBEAL2
0	0.493029	0.331	0.106	0	2	LLGL2
0	0.488735	0.443	0.165	0	2	SERPINB1
0	0.474779	0.283	0.076	0	2	HACD4
0	0.399678	0.998	0.993	0	2	TMSB4X
6.23036e-308	0.627917	0.62	0.333	2.19433e-303	2	AIM2
2.73221e-305	0.625194	0.666	0.394	9.62283e-301	2	ARF6
1.31444e-303	0.503165	0.365	0.129	4.62944e-299	2	LPXN
4.73774e-303	0.616053	0.354	0.124	1.66863e-298	2	DDX60
7.33589e-301	0.705634	0.873	0.694	2.5837e-296	2	LOC719702
4.95366e-300	0.632065	0.295	0.09	1.74468e-295	2	ABCA1
4.60715e-299	0.640818	0.711	0.453	1.62264e-294	2	GLIPR1
6.9396e-299	0.596901	0.334	0.112	2.44413e-294	2	FAM102B
1.77355e-298	0.5037	0.383	0.144	6.24644e-294	2	ODC1
2.4313e-298	0.454077	0.254	0.067	8.56304e-294	2	TMEM106A
2.03325e-292	0.36529	0.346	0.112	7.16111e-288	2	FRMD4B
1.42315e-291	0.527476	0.961	0.86	5.01233e-287	2	PTPRCAP
9.22876e-288	0.58097	0.829	0.621	3.25037e-283	2	COX8A
1.6354e-283	0.475795	0.271	0.08	5.75988e-279	2	CEP78
4.12082e-283	0.589514	0.639	0.373	1.45135e-278	2	SLC25A4
9.64195e-278	0.596543	0.572	0.303	3.39589e-273	2	IL10RA
1.92253e-277	0.550585	0.91	0.749	6.77114e-273	2	IFI16
2.18094e-277	0.642618	0.696	0.436	7.68127e-273	2	CLINT1
2.34149e-276	0.639264	0.853	0.647	8.24672e-272	2	HERC1
5.62445e-276	0.631109	0.697	0.438	1.98093e-271	2	AGPS
1.47681e-275	0.493176	0.363	0.137	5.20134e-271	2	BLVRB
2.16438e-273	0.540163	0.266	0.078	7.62293e-269	2	IL15
2.29385e-273	0.600287	0.904	0.715	8.07895e-269	2	SIK3
2.50109e-273	0.481182	0.96	0.877	8.80886e-269	2	ATP5MPL
1.05823e-272	0.413624	0.265	0.078	3.7271e-268	2	OSBPL7
1.82393e-271	0.588202	0.792	0.583	6.42388e-267	2	MOB2
2.0371e-271	0.549353	0.831	0.622	7.17466e-267	2	BLOC1S1
1.98116e-266	0.586938	0.875	0.659	6.97765e-262	2	CHST11
2.02887e-266	0.495854	0.293	0.095	7.14569e-262	2	PMAIP1
2.65684e-266	0.638426	0.596	0.33	9.3574e-262	2	PDZD8
4.21907e-266	0.628542	0.641	0.38	1.48596e-261	2	OPTN
3.15337e-265	0.525923	0.414	0.177	1.11062e-260	2	PRR5
5.80802e-265	0.665273	0.717	0.46	2.04558e-260	2	LPP
2.43682e-264	0.492686	0.37	0.145	8.58247e-260	2	HPSE
5.96899e-264	0.538861	0.965	0.901	2.10228e-259	2	LOC114669767
2.48876e-263	0.619465	0.772	0.534	8.7654e-259	2	TSPO
4.75492e-262	0.493173	0.445	0.199	1.67468e-257	2	2024-03-02
2.17002e-260	0.48254	0.941	0.841	7.64281e-256	2	LCK
5.26986e-260	0.678986	0.613	0.343	1.85604e-255	2	ANTXR2
2.56262e-259	0.553398	0.515	0.262	9.02555e-255	2	IDS
1.54879e-257	0.55206	0.704	0.448	5.45484e-253	2	ANXA6
4.80508e-257	0.558659	0.415	0.179	1.69235e-252	2	KIF13B
5.16505e-256	0.512333	0.881	0.71	1.81913e-251	2	ELOB
8.90463e-252	0.541909	0.738	0.496	3.13621e-247	2	RABAC1
2.41208e-251	0.577515	0.812	0.594	8.49533e-247	2	CAST
7.46058e-251	0.408609	0.273	0.088	2.62762e-246	2	GGT1
3.10878e-250	0.516459	0.886	0.728	1.09491e-245	2	ACTR3
1.73748e-246	0.478476	0.275	0.089	6.11942e-242	2	FAM13A
3.50327e-246	0.410646	0.293	0.1	1.23385e-241	2	SLC6A6
6.3225e-246	0.553634	0.816	0.586	2.22679e-241	2	EZR
2.99837e-245	0.491869	0.929	0.786	1.05603e-240	2	CAPZB
3.9963e-245	1.20712	0.576	0.366	1.4075e-240	2	LOC100426197
1.12188e-244	0.841061	0.566	0.339	3.95125e-240	2	LOC106995452
9.04944e-244	0.540281	0.404	0.18	3.18721e-239	2	SERPINA1
1.0412e-243	0.617503	0.746	0.508	3.66712e-239	2	SLC4A7
1.63962e-243	0.559424	0.566	0.313	5.77476e-239	2	CHST12
5.39245e-243	0.583206	0.842	0.615	1.89922e-238	2	ZFP36L2
1.73771e-242	0.502385	0.467	0.223	6.12021e-238	2	ATP1B3
1.19956e-240	0.565238	0.677	0.439	4.22484e-236	2	COMT
3.45684e-240	0.409629	0.272	0.089	1.2175e-235	2	ACOT7
9.59271e-240	0.548175	0.682	0.435	3.37855e-235	2	IL10RB
2.05591e-239	0.508362	0.85	0.685	7.24093e-235	2	LSP1
5.9237e-239	0.540206	0.544	0.303	2.08633e-234	2	RNPEPL1
1.59219e-238	0.543788	0.62	0.375	5.60769e-234	2	SLC9A3R1
1.12505e-237	0.446199	0.353	0.143	3.96244e-233	2	TNFSF12
1.04088e-236	0.43434	0.341	0.134	3.66597e-232	2	LOC710961
1.35868e-235	0.569381	0.447	0.211	4.78528e-231	2	ADIPOR2
8.21066e-235	0.540593	0.792	0.599	2.89179e-230	2	CAP1
1.45113e-234	0.467367	0.374	0.157	5.11087e-230	2	TPST2
2.4655e-234	0.507555	0.423	0.196	8.6835e-230	2	TSPAN32
3.50639e-234	0.522136	0.596	0.351	1.23495e-229	2	ARPC5L
3.62155e-232	0.576919	0.614	0.368	1.27551e-227	2	IRF1
3.49958e-231	0.570787	0.51	0.263	1.23255e-226	2	MT2A
8.85297e-229	0.607665	0.402	0.178	3.11802e-224	2	PLEKHA5
1.00144e-227	0.484049	0.459	0.224	3.52706e-223	2	SUMO3
3.68898e-227	0.481616	0.971	0.911	1.29926e-222	2	LOC704104
4.54138e-227	0.528487	0.532	0.295	1.59948e-222	2	RNF167
1.05306e-226	0.47773	0.414	0.19	3.70888e-222	2	TPM4
3.06385e-226	0.433633	0.301	0.11	1.07909e-221	2	PAFAH2
1.28615e-225	0.493117	0.884	0.73	4.52983e-221	2	CAPZA1
5.2964e-225	0.488389	0.456	0.223	1.86539e-220	2	SASH3
9.96513e-225	0.321016	0.994	0.974	3.50972e-220	2	ATP5F1E
1.3079e-222	0.570164	0.899	0.749	4.60642e-218	2	SRPK2
3.87975e-222	0.652999	0.698	0.496	1.36645e-217	2	PIK3R1
2.39321e-221	0.516191	0.794	0.559	8.4289e-217	2	ADGRE5
5.47262e-220	0.504014	0.705	0.474	1.92746e-215	2	SELENOT
1.67879e-219	0.538119	0.6	0.345	5.9127e-215	2	MAP4
3.76153e-219	0.540507	0.849	0.682	1.32481e-214	2	RASSF1
1.91479e-218	0.55883	0.704	0.487	6.74389e-214	2	EFCC1
1.63096e-215	0.521549	0.366	0.155	5.74425e-211	2	RGS1
2.43803e-215	0.522568	0.563	0.328	8.58674e-211	2	PPP1R18
5.37643e-215	0.675782	0.522	0.29	1.89358e-210	2	CRY1
2.35257e-213	0.383369	0.975	0.934	8.28577e-209	2	UBB
2.21374e-212	0.497805	0.485	0.259	7.79678e-208	2	PRKAR1A
5.37782e-212	0.503814	0.632	0.399	1.89407e-207	2	LAMP1
3.9964e-211	0.539219	0.587	0.34	1.40753e-206	2	IKZF3
4.55065e-210	1.0787	0.743	0.545	1.60274e-205	2	LOC701976
5.82252e-209	0.409289	0.986	0.945	2.05069e-204	2	ACTG1
3.02475e-207	0.483736	0.81	0.585	1.06532e-202	2	S100A6
2.76044e-204	0.43621	0.724	0.489	9.72227e-200	2	TXN
1.26698e-201	0.429654	0.893	0.759	4.46232e-197	2	PSMB8
2.07626e-201	0.621308	0.954	0.89	7.31258e-197	2	LOC703029
9.71005e-201	0.490004	0.574	0.338	3.41988e-196	2	RALGDS
1.35754e-200	0.560716	0.609	0.391	4.78126e-196	2	CNST
1.56238e-200	0.4921	0.579	0.336	5.50271e-196	2	RAB8B
9.33361e-199	0.345163	0.991	0.967	3.2873e-194	2	FTL
2.40168e-198	0.490183	0.631	0.389	8.45872e-194	2	ELOVL5
3.48874e-198	0.392149	0.309	0.125	1.22874e-193	2	LMO4
2.4932e-197	0.414471	0.982	0.935	8.78104e-193	2	AKAP13
2.74263e-197	0.444844	0.9	0.768	9.65953e-193	2	MYH9
3.23889e-194	0.400466	0.92	0.804	1.14074e-189	2	UBL5
1.71861e-192	0.450074	0.843	0.693	6.05296e-188	2	ARPC5
2.82719e-192	0.403588	0.376	0.176	9.95735e-188	2	PMVK
5.02838e-192	0.463208	0.582	0.364	1.77099e-187	2	ETFB
2.52868e-191	0.470768	0.553	0.319	8.90602e-187	2	PLP2
3.23001e-191	0.430384	0.459	0.24	1.13761e-186	2	ANP32E
1.24645e-190	0.4395	0.353	0.16	4.38999e-186	2	PTDSS1
3.47634e-190	0.498086	0.848	0.644	1.22437e-185	2	TOX
5.05841e-190	0.478668	0.837	0.673	1.78157e-185	2	YWHAZ
1.59474e-189	0.457704	0.761	0.558	5.61667e-185	2	LDHA
5.13924e-189	0.483225	0.792	0.572	1.81004e-184	2	LRRFIP1
1.41289e-188	0.464739	0.375	0.175	4.97619e-184	2	SLAMF1
3.18154e-188	0.506434	0.537	0.325	1.12054e-183	2	GSTK1
9.49445e-188	0.586579	0.528	0.309	3.34395e-183	2	GLUD1
1.77423e-185	0.463411	0.41	0.205	6.24882e-181	2	RAB37
3.32167e-185	0.347739	0.993	0.967	1.16989e-180	2	CD3D
4.09259e-185	0.507818	0.78	0.598	1.44141e-180	2	CD6
2.57326e-184	0.430102	0.389	0.19	9.06301e-180	2	D2HGDH
3.40927e-184	0.555697	0.512	0.298	1.20074e-179	2	OXSR1
9.41557e-184	0.500922	0.549	0.325	3.31616e-179	2	CSGALNACT2
1.55937e-182	0.454905	0.879	0.735	5.4921e-178	2	DOCK2
2.01647e-182	0.36657	0.268	0.103	7.10201e-178	2	LOC712661
2.34412e-182	0.465082	0.434	0.228	8.25599e-178	2	GMIP
3.43398e-182	0.448348	0.474	0.257	1.20945e-177	2	ATP1A1
1.91328e-181	0.462165	0.72	0.523	6.73857e-177	2	PPP1CA
6.93882e-181	0.463214	0.422	0.217	2.44385e-176	2	TMX4
1.15966e-180	0.304387	0.992	0.971	4.08432e-176	2	GMFG
1.69244e-179	0.491697	0.81	0.643	5.96078e-175	2	ITCH
8.90397e-178	0.474549	0.628	0.422	3.13598e-173	2	REEP5
9.67626e-178	0.496022	0.679	0.475	3.40798e-173	2	PTPN1
1.67141e-177	0.565272	0.405	0.199	5.88672e-173	2	CD96
2.05882e-177	0.470372	0.525	0.305	7.25115e-173	2	SLC35D2
3.05395e-177	0.427351	0.971	0.888	1.0756e-172	2	JUND
3.64793e-177	0.466194	0.718	0.517	1.2848e-172	2	ARHGAP30
5.48716e-177	0.449223	0.787	0.625	1.93258e-172	2	LOC707227
6.52025e-177	0.447607	0.445	0.24	2.29643e-172	2	AKIRIN2
9.35002e-177	0.556416	0.607	0.388	3.29308e-172	2	GRK5
2.89028e-176	0.481159	0.365	0.176	1.01796e-171	2	RNF144A
3.66814e-176	0.517083	0.43	0.227	1.29192e-171	2	KIF1B
1.96688e-175	0.415792	0.356	0.166	6.92737e-171	2	SH2D1A
2.25047e-175	0.454709	0.477	0.262	7.92615e-171	2	APOL2
2.81334e-175	0.392405	0.307	0.133	9.90858e-171	2	PNPLA6
3.63547e-175	0.464199	0.529	0.317	1.28041e-170	2	RHOF
6.60124e-175	0.451009	0.504	0.291	2.32496e-170	2	ARRB2
2.23448e-174	0.413534	0.916	0.823	7.86984e-170	2	SEPTIN7
8.13863e-172	0.45132	0.698	0.498	2.86643e-167	2	ARPC4
3.76075e-171	0.476319	0.832	0.678	1.32454e-166	2	SP100
4.58068e-171	0.504889	0.624	0.394	1.61331e-166	2	LOC106997893
9.47764e-171	0.379424	0.945	0.874	3.33803e-166	2	ATP5MG
2.55741e-170	0.51837	0.546	0.338	9.00721e-166	2	CMIP
3.39964e-170	0.470322	0.569	0.361	1.19735e-165	2	GNAI3
4.92121e-170	0.442688	0.487	0.28	1.73325e-165	2	RPS6KA1
1.5887e-169	0.417418	0.907	0.799	5.5954e-165	2	BIN2
1.05214e-168	0.408115	0.393	0.199	3.70564e-164	2	SIRT2
2.47221e-167	0.383212	0.28	0.117	8.70711e-163	2	BCL2A1
2.8597e-166	0.482116	0.489	0.281	1.00719e-161	2	ULK2
8.60064e-166	0.492541	0.857	0.72	3.02914e-161	2	WNK1
2.00581e-165	0.395951	0.966	0.909	7.06445e-161	2	VPS13B
5.36747e-165	0.510891	0.634	0.411	1.89042e-160	2	EIF4G3
5.60917e-165	0.429014	0.489	0.283	1.97555e-160	2	RAB11A
1.16192e-164	0.443428	0.519	0.315	4.09227e-160	2	CAPNS1
1.31591e-164	0.339703	0.997	0.975	4.63462e-160	2	SKAP1
2.14508e-163	0.416233	0.414	0.221	7.55497e-159	2	UCKL1
4.02627e-163	0.503753	0.702	0.497	1.41805e-158	2	TANK
1.22643e-162	0.865895	0.345	0.178	4.3195e-158	2	APBB2
3.81049e-162	0.457047	0.331	0.155	1.34205e-157	2	NR4A2
9.85975e-162	0.473983	0.786	0.63	3.4726e-157	2	AKNA
1.74637e-160	0.573913	0.577	0.372	6.1507e-156	2	IFI6
2.64599e-160	0.474903	0.533	0.33	9.31919e-156	2	SLK
7.77162e-159	0.430773	0.78	0.613	2.73716e-154	2	PRR13
1.36043e-158	0.436564	0.589	0.388	4.79143e-154	2	DRAP1
2.34097e-158	0.488741	0.48	0.279	8.2449e-154	2	LRMP
8.61259e-158	0.349947	0.261	0.107	3.03335e-153	2	CTSC
1.27283e-157	0.437529	0.459	0.261	4.48292e-153	2	MAPKAPK2
8.99812e-157	0.381591	0.919	0.818	3.16914e-152	2	YWHAB
1.2637e-155	0.430275	0.686	0.498	4.45075e-151	2	TLR9
2.04508e-155	0.450639	0.693	0.498	7.20277e-151	2	MAPK1
1.47062e-154	0.501145	0.757	0.587	5.17952e-150	2	LOC106992273
5.65349e-154	0.525628	0.435	0.248	1.99116e-149	2	IFI27
1.0661e-153	0.430574	0.694	0.508	3.75479e-149	2	FKBP1A
1.34677e-153	0.467675	0.748	0.57	4.74334e-149	2	NLRC5
1.91257e-153	0.417045	0.584	0.387	6.73609e-149	2	VASP
5.85653e-153	0.370069	0.391	0.206	2.06267e-148	2	EBP
2.13108e-152	0.469832	0.978	0.957	7.50567e-148	2	KEG06-p08
7.64673e-152	0.402683	0.384	0.198	2.69318e-147	2	ABCB10
3.18209e-151	0.414165	0.47	0.279	1.12073e-146	2	C10H20orf24
8.21036e-151	0.456479	0.974	0.916	2.89169e-146	2	FKBP5
2.32472e-150	0.456868	0.711	0.543	8.18765e-146	2	IL2RG
1.17927e-149	0.458405	0.822	0.664	4.1534e-145	2	NCOA2
2.02807e-149	0.399052	0.744	0.57	7.14288e-145	2	ARF1
3.03251e-149	0.445037	0.736	0.536	1.06805e-144	2	LOC719250
6.12219e-149	0.351008	0.314	0.148	2.15624e-144	2	CD151
2.16009e-148	0.397924	0.303	0.139	7.60783e-144	2	UBE2Q2
2.46747e-148	0.464569	0.62	0.421	8.69043e-144	2	CD226
5.5469e-148	0.41135	0.891	0.79	1.95362e-143	2	LOC696748
1.05092e-147	0.399362	0.984	0.93	3.70134e-143	2	LOC708686
4.62466e-147	0.378797	0.894	0.8	1.62881e-142	2	UQCR
8.13449e-147	0.351024	0.343	0.171	2.86497e-142	2	ADA
1.5952e-146	0.51951	0.724	0.547	5.61829e-142	2	ST8SIA4
1.18435e-145	0.370714	0.747	0.57	4.1713e-141	2	COX6B1
4.61708e-145	0.407219	0.402	0.222	1.62614e-140	2	GAK
5.63989e-145	0.337425	0.273	0.119	1.98637e-140	2	ACSL5
8.28508e-145	0.385425	0.783	0.624	2.918e-140	2	TMEM59
9.32108e-145	0.40226	0.447	0.255	3.28289e-140	2	ABR
2.25466e-143	0.393605	0.865	0.701	7.94091e-139	2	TAGLN2
3.07305e-143	0.438757	0.589	0.391	1.08233e-138	2	SGMS1
6.67197e-143	0.435185	0.833	0.691	2.34987e-138	2	ZNF292
3.79737e-142	0.399392	0.595	0.401	1.33743e-137	2	GNB2
4.25636e-142	0.385875	0.909	0.8	1.49909e-137	2	SORL1
9.58526e-141	0.363282	0.883	0.762	3.37593e-136	2	RHOA
2.0693e-140	0.427224	0.529	0.339	7.28809e-136	2	TSEN54
3.121e-140	0.380484	0.815	0.674	1.09922e-135	2	NDUFA3
5.59067e-140	0.395103	0.62	0.426	1.96903e-135	2	PRDX6
7.72353e-139	0.37439	0.551	0.356	2.72023e-134	2	BCL7C
1.13651e-138	0.425073	0.754	0.593	4.0028e-134	2	SPATA13
1.84256e-138	0.418864	0.758	0.592	6.48949e-134	2	FMNL1
4.88594e-138	0.412103	0.563	0.38	1.72083e-133	2	ABHD17A
6.18433e-138	0.435933	0.706	0.529	2.17812e-133	2	MARK3
1.78667e-137	0.310659	0.972	0.928	6.29265e-133	2	CDC42
4.57814e-137	0.34364	0.288	0.134	1.61242e-132	2	MAST3
7.63224e-137	0.389436	0.827	0.679	2.68807e-132	2	GNAI2
1.29572e-135	0.328598	0.281	0.128	4.56351e-131	2	PCSK7
3.87928e-135	0.34976	0.387	0.212	1.36628e-130	2	DERL1
2.70309e-134	0.409013	0.526	0.338	9.52027e-130	2	GLRX
5.04964e-133	0.388135	0.536	0.344	1.77848e-128	2	DSTN
1.11315e-132	0.503146	0.533	0.348	3.92053e-128	2	RRAS2
2.20659e-132	0.511865	0.498	0.309	7.7716e-128	2	TNFAIP3
2.43093e-132	0.421914	0.58	0.384	8.56173e-128	2	MYO5A
7.67876e-131	0.465346	0.809	0.682	2.70446e-126	2	NFATC3
8.52132e-130	0.430591	0.642	0.461	3.00121e-125	2	VPS13C
8.83373e-130	0.362321	0.747	0.587	3.11124e-125	2	LOC696956
2.44704e-129	0.398387	0.6	0.415	8.61847e-125	2	ATOX1
2.50785e-129	0.313986	0.287	0.136	8.83266e-125	2	DOK2
2.91236e-129	0.340074	0.279	0.13	1.02573e-124	2	DTD1
7.39032e-129	0.395177	0.409	0.236	2.60287e-124	2	CLN3
9.49615e-128	0.42131	0.483	0.304	3.34454e-123	2	LPIN1
1.78539e-127	0.406018	0.559	0.372	6.28815e-123	2	CCND2
2.88387e-127	0.335088	0.275	0.129	1.0157e-122	2	UBXN2B
1.11285e-126	0.333867	0.344	0.176	3.91945e-122	2	LPGAT1
3.3987e-126	0.340358	0.942	0.878	1.19702e-121	2	FTH1
2.18415e-125	0.327414	0.965	0.913	7.69259e-121	2	STK17A
4.8676e-125	0.430679	0.671	0.489	1.71437e-120	2	RAP1GDS1
7.42834e-124	0.387784	0.52	0.341	2.61626e-119	2	SLFN5
1.74684e-123	0.284589	0.257	0.117	6.15236e-119	2	RAB24
1.32863e-122	0.377114	0.601	0.421	4.67943e-118	2	BSG
2.2437e-122	0.346301	0.358	0.196	7.90231e-118	2	SSNA1
1.21925e-121	0.42813	0.501	0.322	4.29419e-117	2	EPSTI1
2.23741e-120	0.383326	0.682	0.512	7.88014e-116	2	HCLS1
6.68903e-120	0.411881	0.438	0.267	2.35588e-115	2	LOC114679625
8.66203e-120	0.468502	0.797	0.668	3.05077e-115	2	TRPS1
1.15012e-119	0.35361	0.774	0.63	4.05072e-115	2	ATP6V0E1
1.44336e-119	0.369492	0.463	0.283	5.08352e-115	2	VRK1
9.63002e-119	0.374975	0.342	0.183	3.39169e-114	2	FAM126A
1.21125e-118	0.322003	0.311	0.16	4.26603e-114	2	SMIM3
1.32203e-118	0.310993	0.333	0.174	4.65621e-114	2	SLC2A4RG
1.34761e-118	0.392578	0.847	0.691	4.74629e-114	2	ARID5B
3.75558e-118	0.368903	0.39	0.223	1.32272e-113	2	ILRUN
3.64127e-117	0.357825	0.311	0.162	1.28246e-112	2	C3H21orf91
3.93454e-117	0.339461	0.787	0.647	1.38575e-112	2	GNG5
8.43021e-117	0.408115	0.785	0.641	2.96912e-112	2	PTPRA
1.21128e-115	0.29225	0.297	0.15	4.26612e-111	2	APMAP
1.59607e-115	0.390828	0.691	0.534	5.62134e-111	2	DYNLT1
2.19691e-115	0.385277	0.599	0.424	7.73752e-111	2	TAF7
3.59405e-115	0.296116	0.29	0.147	1.26582e-110	2	PDZD11
1.22273e-114	0.345347	0.717	0.558	4.30647e-110	2	MGST3
3.96525e-114	0.444006	0.476	0.308	1.39656e-109	2	BMP2K
7.45943e-114	0.333113	0.265	0.126	2.62721e-109	2	E2F3
1.8617e-113	0.324934	0.257	0.122	6.5569e-109	2	MARK4
2.2846e-113	0.354262	0.366	0.206	8.04637e-109	2	MYO9B
3.57554e-113	0.323641	0.338	0.184	1.2593e-108	2	MAP4K1
2.6888e-112	0.408636	0.496	0.328	9.46997e-108	2	TRIM26
4.10724e-112	0.319764	0.936	0.864	1.44657e-107	2	ANKRD11
4.67506e-112	0.389005	0.349	0.195	1.64656e-107	2	HNRNPLL
5.81516e-112	0.335397	0.682	0.526	2.0481e-107	2	COPE
1.92969e-111	0.35739	0.459	0.285	6.79637e-107	2	OGDH
8.58614e-111	0.410307	0.722	0.559	3.02404e-106	2	NFAT5
6.3865e-110	0.32082	0.529	0.352	2.24932e-105	2	IER3IP1
1.17163e-109	0.387608	0.642	0.483	4.12647e-105	2	MAMU-E
1.56832e-109	0.309021	0.387	0.225	5.52362e-105	2	TBCB
1.68269e-109	0.393037	0.653	0.49	5.92643e-105	2	NCK1
3.18919e-109	0.338929	0.391	0.232	1.12323e-104	2	ARRDC2
4.03667e-109	0.34011	0.431	0.268	1.42172e-104	2	TRAPPC1
4.95581e-109	0.378719	0.44	0.273	1.74544e-104	2	MACO1
5.75335e-109	0.504641	0.567	0.403	2.02633e-104	2	AHI1
2.16935e-108	0.359699	0.706	0.56	7.64044e-104	2	BZW1
9.49848e-108	0.312471	0.653	0.484	3.34536e-103	2	VDAC3
1.58748e-107	0.338871	0.48	0.313	5.59112e-103	2	LOC696959
2.07439e-107	0.423601	0.526	0.353	7.30599e-103	2	NT5DC1
6.87344e-107	0.327905	0.649	0.486	2.42083e-102	2	NDUFB7
2.17935e-106	0.397391	0.731	0.569	7.67567e-102	2	NEDD9
3.003e-106	0.336178	0.359	0.205	1.05766e-101	2	PTTG1IP
6.16256e-106	0.279797	0.295	0.155	2.17045e-101	2	MCRIP1
7.30512e-106	0.32682	0.319	0.173	2.57286e-101	2	DUSP18
9.61492e-106	0.367378	0.435	0.277	3.38637e-101	2	ACTB
3.65295e-105	0.355679	0.483	0.319	1.28657e-100	2	IQGAP1
6.88784e-105	0.351687	0.361	0.21	2.4259e-100	2	TIMP1
1.50984e-104	0.321093	0.373	0.219	5.31767e-100	2	NFKBIB
2.36964e-104	0.294241	0.272	0.138	8.34586e-100	2	BLCAP
4.33e-104	0.292068	0.298	0.157	1.52503e-99	2	ATP6V0D1
4.54732e-104	0.298902	0.298	0.159	1.60157e-99	2	RAB1B
8.55719e-104	0.302654	0.297	0.156	3.01384e-99	2	GTF3C1
2.32684e-103	0.296301	0.525	0.355	8.19512e-99	2	CALM3
9.06982e-103	0.297811	0.284	0.147	3.19439e-98	2	AMZ2
1.72761e-102	0.360875	0.408	0.251	6.08466e-98	2	KIF21B
1.86116e-102	0.338722	0.529	0.366	6.55502e-98	2	BLOC1S2
2.17256e-102	0.299352	0.649	0.491	7.65175e-98	2	PSMB6
6.54811e-102	0.304133	0.297	0.157	2.30624e-97	2	OSTM1
9.7665e-102	0.400901	0.454	0.292	3.43976e-97	2	MAP4K5
1.09599e-101	0.559925	0.464	0.255	3.86008e-97	2	LOC693820
1.33228e-101	0.312293	0.664	0.511	4.69229e-97	2	ARF5
2.18614e-101	0.316395	0.767	0.634	7.69957e-97	2	NDUFB2
6.1511e-101	0.295165	0.268	0.137	2.16642e-96	2	B4GALT1
1.02207e-100	0.334432	0.464	0.293	3.59973e-96	2	MYADM
1.24769e-100	0.294455	0.274	0.139	4.39438e-96	2	STAMBPL1
5.4371e-100	0.431169	0.575	0.416	1.91495e-95	2	RB1
1.30553e-99	0.403315	0.822	0.708	4.59808e-95	2	ARL15
2.65306e-99	0.277267	0.255	0.128	9.34409e-95	2	GPR108
2.98678e-99	0.36086	0.719	0.572	1.05194e-94	2	UBE2H
3.10756e-99	0.404413	0.446	0.282	1.09448e-94	2	HLCS
4.57234e-99	0.368915	0.673	0.512	1.61038e-94	2	NEK7
4.91643e-99	0.315157	0.427	0.269	1.73157e-94	2	ILK
1.50958e-98	0.334817	0.433	0.276	5.31673e-94	2	FAM53B
3.71747e-98	0.264605	0.983	0.956	1.30929e-93	2	KEG06-p12
5.53795e-98	0.33533	0.396	0.244	1.95047e-93	2	OTULINL
6.80069e-98	0.270369	0.785	0.589	2.3952e-93	2	MAP3K5
3.43609e-97	0.361531	0.57	0.417	1.21019e-92	2	PBXIP1
4.2866e-97	0.274313	0.307	0.168	1.50974e-92	2	CMAS
7.52159e-97	0.343797	0.637	0.479	2.6491e-92	2	SH3BGRL
8.15585e-97	0.383753	0.258	0.134	2.87249e-92	2	STX2
1.24281e-96	0.301151	0.654	0.498	4.37718e-92	2	NDUFB10
1.99492e-96	0.360527	0.444	0.288	7.02611e-92	2	ARNTL
2.46378e-96	0.309125	0.488	0.331	8.67745e-92	2	GUK1
4.88194e-96	0.341723	0.288	0.154	1.71942e-91	2	HIVEP3
7.22288e-96	0.381273	0.622	0.455	2.5439e-91	2	TTC39C
1.87949e-95	0.350935	0.532	0.375	6.61956e-91	2	RASAL3
3.71275e-95	0.274362	0.288	0.154	1.30763e-90	2	STK40
3.74135e-95	0.346983	0.604	0.444	1.3177e-90	2	TRAPPC10
4.33842e-95	0.261001	0.289	0.156	1.52799e-90	2	CDC34
4.8123e-95	0.2853	0.954	0.906	1.69489e-90	2	SELENOW
4.95012e-95	0.337158	0.605	0.45	1.74343e-90	2	CCDC69
8.78314e-95	0.339125	0.625	0.469	3.09342e-90	2	CCPG1
9.55486e-95	0.364014	0.622	0.47	3.36522e-90	2	CD63
3.50116e-94	0.302301	0.573	0.406	1.23311e-89	2	CMTM6
6.2169e-94	0.404201	0.627	0.489	2.18959e-89	2	LOC100424348
1.51639e-93	0.275019	0.336	0.194	5.34074e-89	2	FIBP
1.72151e-93	0.305292	0.447	0.293	6.06316e-89	2	GSDMD
2.13303e-93	0.341376	0.457	0.303	7.51253e-89	2	RNF34
3.87046e-93	0.366091	0.596	0.439	1.36318e-88	2	NFATC2
4.23543e-93	0.288288	0.906	0.81	1.49172e-88	2	OST4
4.35329e-93	0.317047	0.862	0.771	1.53323e-88	2	CD37
5.43928e-93	0.406301	0.817	0.717	1.91571e-88	2	GNG2
6.79798e-93	0.379907	0.547	0.394	2.39425e-88	2	PLEKHA2
9.21805e-93	0.345712	0.521	0.363	3.2466e-88	2	LFNG
2.98177e-92	0.440727	0.734	0.621	1.05018e-87	2	LYST
1.42218e-91	0.307076	0.334	0.192	5.00891e-87	2	SLA
1.70128e-91	0.303511	0.395	0.245	5.99192e-87	2	TBPL1
2.04754e-90	0.279325	0.29	0.158	7.21144e-86	2	SERTAD3
5.35341e-90	0.280333	0.586	0.428	1.88547e-85	2	MRPL41
7.50554e-90	0.295745	0.451	0.296	2.64345e-85	2	ARL6IP1
1.8247e-89	0.309063	0.301	0.169	6.42659e-85	2	TAPBPL
3.06411e-89	0.30067	0.268	0.143	1.07918e-84	2	OSBPL3
7.17207e-89	0.277907	0.41	0.262	2.526e-84	2	PRELID1
7.30542e-89	0.287876	0.299	0.167	2.57297e-84	2	MIDN
1.09068e-88	0.308125	0.616	0.465	3.84138e-84	2	TMEM160
6.71456e-88	0.270632	0.706	0.551	2.36487e-83	2	TPI1
1.69915e-87	0.312051	0.772	0.65	5.98441e-83	2	DYNLRB1
1.73247e-87	0.347219	0.464	0.31	6.10174e-83	2	CA5B
2.88062e-87	0.351478	0.749	0.627	1.01455e-82	2	XRN1
3.17956e-87	0.369592	0.379	0.239	1.11984e-82	2	SERPINB9
1.99008e-86	0.343264	0.713	0.57	7.00907e-82	2	KIAA1257
2.20138e-86	0.308668	0.325	0.191	7.75324e-82	2	NLRC3
4.51162e-86	0.266993	0.457	0.306	1.58899e-81	2	PIN1
5.21342e-86	0.31465	0.464	0.318	1.83617e-81	2	BCAP31
3.59798e-85	0.343271	0.639	0.499	1.26721e-80	2	PDIA3
4.43522e-85	0.299485	0.575	0.425	1.56208e-80	2	CSTB
4.92584e-85	0.357107	0.769	0.659	1.73488e-80	2	CALR
5.99467e-85	0.353255	0.592	0.442	2.11132e-80	2	SMAD3
6.61766e-85	0.302367	0.353	0.214	2.33074e-80	2	MEF2D
7.23879e-85	0.290532	0.357	0.22	2.5495e-80	2	HTATSF1
1.30517e-84	0.308612	0.656	0.517	4.59679e-80	2	SCP2
1.4034e-84	0.311784	0.376	0.235	4.94277e-80	2	SACM1L
1.85442e-84	0.28216	0.29	0.163	6.53125e-80	2	RMC1
3.21273e-84	0.276538	0.867	0.764	1.13152e-79	2	FXYD5
4.4137e-84	0.258887	0.25	0.131	1.55451e-79	2	KIF3A
1.73285e-83	0.270454	0.357	0.219	6.1031e-79	2	TMEM9B
1.94707e-83	0.296308	0.304	0.176	6.85758e-79	2	CASP10
2.4751e-83	0.318164	0.534	0.388	8.71729e-79	2	ICAM3
2.64673e-83	0.291164	0.798	0.698	9.32179e-79	2	LOC720636
3.09487e-83	0.29251	0.622	0.474	1.09001e-78	2	PSMA5
4.09217e-83	0.329843	0.531	0.378	1.44126e-78	2	CFLAR
4.73097e-83	0.271144	0.745	0.619	1.66625e-78	2	NEDD8
6.44057e-83	0.318624	0.69	0.548	2.26837e-78	2	CD4
6.49328e-83	0.664794	0.566	0.423	2.28693e-78	2	MAMU-A
6.65454e-83	0.286668	0.367	0.228	2.34373e-78	2	NMI
1.88884e-82	0.290915	0.638	0.498	6.65249e-78	2	IRF3
2.65216e-82	0.29369	0.263	0.144	9.34091e-78	2	CITED2
4.9138e-82	0.343564	0.571	0.425	1.73064e-77	2	GOLPH3
5.88343e-82	0.303081	0.287	0.162	2.07214e-77	2	SMC6
6.23969e-82	0.277973	0.369	0.233	2.19762e-77	2	AP1S1
6.36785e-82	0.278463	0.321	0.191	2.24276e-77	2	EHD1
9.42135e-82	0.349386	0.594	0.456	3.3182e-77	2	PSMA1
1.13956e-81	0.282071	0.657	0.519	4.01352e-77	2	NDUFA13
2.41723e-81	0.279109	0.403	0.263	8.51348e-77	2	PSENEN
3.30566e-81	0.331081	0.304	0.175	1.16425e-76	2	NEDD4
6.85478e-81	0.255158	0.885	0.795	2.41425e-76	2	SUMO2
9.57883e-81	0.285094	0.348	0.213	3.37367e-76	2	NCOR2
1.23244e-80	0.303448	0.49	0.346	4.34066e-76	2	RAB4A
1.48399e-80	0.303824	0.636	0.497	5.22661e-76	2	ARHGDIA
1.69524e-80	0.302458	0.365	0.228	5.97062e-76	2	SLC25A42
2.36141e-80	0.285852	0.257	0.139	8.31688e-76	2	AGO4
2.71738e-80	0.26596	0.488	0.34	9.57062e-76	2	SNF8
4.90404e-80	0.288823	0.349	0.215	1.7272e-75	2	PFKP
5.38838e-80	0.279898	0.448	0.305	1.89779e-75	2	SEC11C
7.68853e-80	0.269476	0.397	0.258	2.7079e-75	2	EMC7
8.42691e-80	0.302264	0.679	0.547	2.96796e-75	2	BRK1
1.60377e-79	0.273983	0.367	0.232	5.64847e-75	2	LAP3
2.21688e-79	0.300257	0.398	0.258	7.80785e-75	2	LASP1
5.00207e-79	0.30877	0.308	0.182	1.76173e-74	2	FKBP15
5.52083e-79	0.276614	0.712	0.566	1.94444e-74	2	ATP5PD
6.59635e-79	0.363129	0.54	0.397	2.32323e-74	2	BAX
8.55451e-79	0.28106	0.614	0.471	3.0129e-74	2	COX14
1.13394e-78	0.296915	0.469	0.327	3.99375e-74	2	SDF4
1.82387e-78	0.294552	0.476	0.332	6.42366e-74	2	SCAMP2
1.90057e-78	0.305311	0.538	0.397	6.6938e-74	2	LOC707555
3.17487e-78	0.385576	0.502	0.356	1.11819e-73	2	MAP2K6
4.05299e-78	0.296202	0.61	0.458	1.42746e-73	2	CTSS
4.59908e-78	0.32499	0.455	0.317	1.6198e-73	2	KLHL2
7.15698e-78	0.314376	0.512	0.372	2.52069e-73	2	CDC26
1.28308e-77	0.28735	0.58	0.436	4.51899e-73	2	NDUFC2
4.40888e-77	0.281105	0.27	0.152	1.55281e-72	2	CDYL2
8.22284e-77	0.383267	0.475	0.338	2.89609e-72	2	MSH3
1.19888e-76	0.298642	0.495	0.353	4.22246e-72	2	TAP1
1.23651e-76	0.302048	0.632	0.473	4.35498e-72	2	JAZF1
1.34228e-76	0.337056	0.325	0.195	4.72751e-72	2	MAST2
2.02083e-76	0.316815	0.467	0.326	7.11735e-72	2	TUBA1A
2.67719e-76	0.296672	0.507	0.364	9.42906e-72	2	PPP6R1
4.88404e-76	0.322968	0.684	0.545	1.72016e-71	2	RGCC
1.65314e-75	0.265774	0.278	0.16	5.82237e-71	2	CD99
1.71186e-75	0.285412	0.308	0.183	6.02917e-71	2	LOC106999632
3.94301e-75	0.308394	0.606	0.469	1.38873e-70	2	KIAA0040
4.06814e-75	0.288616	0.414	0.279	1.4328e-70	2	SEPHS2
4.29019e-75	0.303352	0.566	0.43	1.511e-70	2	UBE2V1
8.0338e-75	0.294389	0.62	0.481	2.8295e-70	2	BRD9
3.10379e-74	0.311169	0.523	0.384	1.09315e-69	2	C20H16orf54
3.12189e-74	0.33363	0.4	0.264	1.09953e-69	2	CHD9
3.18547e-74	0.34202	0.475	0.334	1.12192e-69	2	VRK2
3.29749e-74	0.29509	0.551	0.416	1.16138e-69	2	FKBP8
8.87698e-74	0.333992	0.661	0.534	3.12647e-69	2	XPO6
9.06144e-74	0.262651	0.279	0.162	3.19144e-69	2	NUDT1
1.07039e-73	0.300921	0.642	0.51	3.76992e-69	2	CIB1
1.30216e-73	0.254164	0.263	0.148	4.58619e-69	2	LOC114672186
1.59471e-73	0.354653	0.307	0.184	5.61657e-69	2	LDAH
2.26819e-73	0.25986	0.776	0.652	7.98855e-69	2	COX7B
4.14222e-73	0.344815	0.689	0.557	1.45889e-68	2	KAT6B
8.57592e-73	0.330197	0.735	0.606	3.02044e-68	2	BAZ1A
8.848e-73	0.272457	0.764	0.658	3.11627e-68	2	ATP5PO
1.17212e-72	0.281923	0.616	0.488	4.12821e-68	2	PSME2
4.30998e-72	0.273082	0.698	0.567	1.51797e-67	2	LOC717879
9.59763e-72	0.325588	0.686	0.555	3.38029e-67	2	ARHGAP25
1.03493e-71	0.266398	0.54	0.401	3.64503e-67	2	SNRPG
1.59582e-71	0.270371	0.301	0.179	5.62047e-67	2	RFFL
1.79397e-71	0.290522	0.568	0.429	6.31835e-67	2	TMOD3
2.00369e-71	0.272951	0.73	0.619	7.05699e-67	2	FIS1
2.90328e-71	0.284798	0.786	0.655	1.02254e-66	2	LOC106996627
2.99404e-71	0.292111	0.516	0.38	1.0545e-66	2	SEPTIN2
4.32626e-71	0.272351	0.756	0.647	1.52371e-66	2	SHISA5
6.38713e-71	0.271841	0.573	0.436	2.24955e-66	2	RAC1
7.07505e-71	0.256447	0.417	0.284	2.49183e-66	2	NAA10
2.38084e-70	0.264598	0.395	0.265	8.38532e-66	2	CLTB
7.15711e-70	0.257675	0.393	0.262	2.52073e-65	2	CAPN1
9.41255e-70	0.335899	0.492	0.363	3.3151e-65	2	AUH
9.58184e-70	0.291299	0.994	0.993	3.37472e-65	2	LOC114674534
2.3527e-69	0.262215	0.353	0.227	8.28622e-65	2	HEBP2
6.17349e-69	0.260608	0.299	0.18	2.1743e-64	2	ACSL4
1.53863e-68	0.309695	0.513	0.374	5.41906e-64	2	RTN4
1.97432e-68	0.267586	0.559	0.428	6.95355e-64	2	RER1
2.97743e-68	0.398318	0.449	0.321	1.04865e-63	2	LOC708994
4.63411e-68	0.313768	0.414	0.284	1.63213e-63	2	REL
8.38756e-68	0.289757	0.372	0.242	2.9541e-63	2	DGLUCY
2.36375e-67	0.269368	0.755	0.651	8.32514e-63	2	RBM3
3.43452e-67	0.250162	0.516	0.382	1.20964e-62	2	PDCD6
4.57806e-67	0.283468	0.555	0.426	1.61239e-62	2	RHOG
6.12193e-67	0.292538	0.361	0.237	2.15614e-62	2	PARP15
6.20495e-67	0.347871	0.665	0.546	2.18538e-62	2	RPS6KA3
7.46007e-67	0.468937	0.556	0.443	2.62744e-62	2	TFDP2
1.43019e-66	0.315241	0.478	0.343	5.03711e-62	2	PPP1R16B
1.50718e-66	0.336042	0.545	0.409	5.30831e-62	2	LOC695267
3.41692e-66	0.298425	0.718	0.6	1.20344e-61	2	PTBP3
3.57295e-66	0.258099	0.402	0.274	1.25839e-61	2	DCTN2
4.4478e-66	0.255939	0.36	0.236	1.56651e-61	2	CTDSP1
5.24105e-66	0.262947	0.918	0.846	1.8459e-61	2	TSC22D3
5.2424e-66	0.300899	0.533	0.389	1.84637e-61	2	RPS6KA5
1.53848e-65	0.259653	0.35	0.229	5.41853e-61	2	BIN1
2.08452e-65	0.260694	0.76	0.645	7.34168e-61	2	UQCRQ
4.69664e-65	0.271459	0.481	0.354	1.65416e-60	2	PDAP1
2.29976e-64	0.276671	0.376	0.252	8.09974e-60	2	LARP7
2.39872e-64	0.314637	0.509	0.38	8.44831e-60	2	VPS8
9.82451e-64	0.278414	0.565	0.439	3.46019e-59	2	PRMT2
1.54122e-63	0.333305	0.454	0.322	5.42816e-59	2	DUSP1
3.63087e-63	0.251426	0.528	0.4	1.27879e-58	2	UQCRC1
4.08263e-63	0.25564	0.381	0.259	1.4379e-58	2	SUPT4H1
5.12234e-63	0.277352	0.785	0.684	1.80409e-58	2	PRPF4B
6.68862e-63	0.278574	0.826	0.722	2.35573e-58	2	TAOK3
9.29524e-63	0.253872	0.499	0.369	3.27378e-58	2	UBE2L3
2.77553e-62	0.300792	0.494	0.36	9.77541e-58	2	APC
3.05394e-62	0.250619	0.785	0.676	1.0756e-57	2	SEMA4D
7.11937e-62	0.28887	0.596	0.468	2.50744e-57	2	ARHGEF6
7.40615e-62	0.271518	0.493	0.364	2.60845e-57	2	FLII
7.79194e-61	0.256514	0.426	0.301	2.74432e-56	2	CAT
9.68925e-60	0.282478	0.485	0.354	3.41255e-55	2	STRN
1.05071e-59	0.280176	0.575	0.454	3.70059e-55	2	SYNRG
1.37e-59	0.285005	0.624	0.49	4.82516e-55	2	STX8
2.03698e-59	0.314598	0.531	0.413	7.17423e-55	2	DNAJB14
2.44364e-59	0.258662	0.333	0.22	8.6065e-55	2	ARL2BP
8.3355e-59	0.278727	0.537	0.414	2.93576e-54	2	LOC697280
8.40561e-59	0.263262	0.428	0.306	2.96045e-54	2	RGS19
1.57087e-58	0.269661	0.679	0.568	5.53261e-54	2	MIER1
2.45705e-58	0.275447	0.293	0.185	8.65373e-54	2	FOCAD
4.86596e-58	0.314294	0.494	0.368	1.71379e-53	2	RNF169
7.51896e-58	0.266984	0.754	0.648	2.64818e-53	2	CYFIP2
3.62843e-57	0.259417	0.386	0.27	1.27793e-52	2	POLD4
5.63901e-57	0.253875	0.327	0.217	1.98606e-52	2	FBXL14
5.73703e-57	0.264483	0.296	0.187	2.02058e-52	2	SPTLC2
1.15741e-56	0.269483	0.806	0.711	4.07641e-52	2	PIAS1
1.53206e-56	0.291973	0.441	0.318	5.3959e-52	2	ANO10
2.03669e-56	0.265607	0.421	0.302	7.17324e-52	2	ABHD12
2.48775e-56	0.327255	0.594	0.478	8.76184e-52	2	FUT8
5.9563e-56	0.28923	0.68	0.578	2.09781e-51	2	SMAP2
2.06866e-55	0.252745	0.353	0.24	7.28582e-51	2	XBP1
4.54854e-55	0.268973	0.498	0.378	1.602e-50	2	PARP14
5.00291e-55	0.25386	0.574	0.454	1.76202e-50	2	CDV3
5.68004e-55	0.250239	0.283	0.18	2.00051e-50	2	LOC114679577
6.1852e-55	0.272024	0.509	0.387	2.17843e-50	2	GMCL1
6.47329e-55	0.25631	0.449	0.33	2.27989e-50	2	ABCF1
7.69444e-55	0.304159	0.627	0.51	2.70998e-50	2	ASCC3
2.02415e-54	0.283805	0.612	0.5	7.12906e-50	2	ST3GAL1
3.03562e-54	0.270029	0.782	0.687	1.06914e-49	2	MKLN1
3.53158e-54	0.276808	0.628	0.512	1.24382e-49	2	YWHAQ
4.08684e-54	0.280316	0.602	0.485	1.43938e-49	2	TRPC4AP
9.51592e-54	0.282934	0.646	0.54	3.35151e-49	2	LOC694823
1.2206e-53	0.312988	0.277	0.174	4.29896e-49	2	TSPAN5
1.11744e-52	0.284936	0.632	0.515	3.93563e-48	2	MICU2
5.00881e-52	0.251793	0.723	0.618	1.7641e-47	2	LCP2
1.53005e-51	0.294964	0.291	0.186	5.38885e-47	2	LOC106996755
1.78768e-51	0.251144	0.353	0.245	6.2962e-47	2	OTULIN
4.37268e-51	0.307582	0.462	0.343	1.54006e-46	2	MYO9A
4.02869e-50	0.267359	0.255	0.159	1.41891e-45	2	CPQ
1.17334e-48	0.253695	0.783	0.686	4.13251e-44	2	OSBPL8
2.96863e-48	0.252533	0.479	0.368	1.04555e-43	2	NPTN
3.44749e-48	0.273988	0.633	0.527	1.21421e-43	2	CDK17
1.92752e-45	0.262206	0.507	0.401	6.78873e-41	2	GPR107
2.23708e-45	0.264907	0.401	0.29	7.87898e-41	2	CRADD
3.07518e-45	0.264727	0.373	0.271	1.08308e-40	2	TMEM263
5.27585e-45	0.272848	0.596	0.495	1.85815e-40	2	RPS27L
1.10381e-44	0.276352	0.565	0.457	3.88763e-40	2	HIVEP1
1.98261e-44	0.258508	0.497	0.389	6.98276e-40	2	DCAF7
2.60664e-43	0.268611	0.675	0.58	9.18059e-39	2	FLI1
1.23068e-42	0.261076	0.694	0.6	4.33447e-38	2	DIAPH2
1.28524e-40	0.300228	0.508	0.405	4.52663e-36	2	LOC114671808
3.28948e-34	0.255031	0.743	0.651	1.15856e-29	2	DENND4A
5.89076e-33	0.257663	0.498	0.411	2.07472e-28	2	NCOA1
6.07409e-29	0.373953	0.597	0.538	2.13929e-24	2	DIPK1A
5.93415e-22	0.250935	0.314	0.251	2.09001e-17	2	PAM

## Sheet: Cluster 3
p_val	avg_log2FC	pct.1	pct.2	p_val_adj	cluster	gene
0	2.59122	0.872	0.136	0	3	IKZF2
0	1.64332	0.691	0.142	0	3	RTKN2
0	1.57679	0.608	0.03	0	3	IL2RA
0	1.28798	0.26	0.018	0	3	RBMS3
0	1.13893	0.494	0.01	0	3	FOXP3
1.53343e-184	1.10402	0.804	0.48	5.40075e-180	3	PLCL1
1.87732e-175	0.976502	0.451	0.164	6.61192e-171	3	MAP4K3
1.54918e-169	0.570786	0.303	0.08	5.45621e-165	3	ID3
6.47653e-151	0.809014	0.253	0.065	2.28103e-146	3	TIGIT
2.21629e-126	0.786347	0.939	0.775	7.80578e-122	3	INPP4B
2.506e-122	0.724551	0.822	0.588	8.82612e-118	3	SAMHD1
6.45158e-117	0.713246	0.617	0.348	2.27225e-112	3	BIRC3
7.35938e-115	0.69512	0.544	0.275	2.59198e-110	3	ZC3H12D
9.13713e-114	0.835919	0.357	0.141	3.2181e-109	3	SPAG16
9.35904e-92	0.653894	0.273	0.1	3.29625e-87	3	ZDHHC14
4.04819e-76	0.531203	0.507	0.288	1.42577e-71	3	B3GLCT
6.99303e-76	0.483712	0.739	0.512	2.46295e-71	3	FCMR
3.09855e-73	0.520602	0.841	0.685	1.09131e-68	3	ISG20
2.62192e-72	0.592842	0.3	0.127	9.23441e-68	3	ALCAM
1.05001e-69	0.374549	0.53	0.295	3.69812e-65	3	TNFRSF1B
1.95539e-68	0.532885	0.359	0.177	6.8869e-64	3	RGS1
2.52277e-66	0.532391	0.38	0.197	8.8852e-62	3	ZNF831
4.19078e-57	0.513091	0.469	0.278	1.47599e-52	3	CASK
1.14966e-56	0.37768	0.286	0.133	4.04911e-52	3	ACVR1
3.7196e-56	0.424859	0.892	0.779	1.31004e-51	3	NSD3
4.79061e-56	0.418096	0.811	0.648	1.68725e-51	3	SPOCK2
1.99079e-55	0.441124	0.837	0.681	7.01156e-51	3	FOXO1
2.63023e-55	0.333688	0.98	0.951	9.26369e-51	3	LOC710951
4.50083e-55	0.53187	0.497	0.32	1.58519e-50	3	NAA15
3.68569e-54	0.414288	0.93	0.831	1.2981e-49	3	CDC14A
4.18034e-54	0.514267	0.744	0.559	1.47232e-49	3	BTBD11
2.50852e-52	0.436078	0.856	0.706	8.83501e-48	3	ARID5B
3.66674e-52	0.524253	0.668	0.487	1.29143e-47	3	JAZF1
1.05265e-51	0.56003	0.459	0.301	3.70744e-47	3	CLDND1
7.28635e-50	0.382955	0.313	0.16	2.56625e-45	3	LOC106994308
1.5397e-49	0.438068	0.435	0.262	5.42282e-45	3	DPEP2
2.64811e-48	0.462059	0.482	0.307	9.32665e-44	3	SESN1
1.00844e-46	0.558873	0.405	0.244	3.55171e-42	3	DUSP16
6.29446e-46	0.414573	0.334	0.181	2.21691e-41	3	TSPAN5
9.09957e-46	0.383661	0.738	0.57	3.20487e-41	3	LOC114674016
2.32141e-44	0.615349	0.799	0.667	8.17601e-40	3	TOX
5.58105e-44	0.411325	0.527	0.352	1.96564e-39	3	CD28
2.5356e-43	0.384845	0.557	0.381	8.93039e-39	3	ICOS
2.82793e-43	0.463494	0.759	0.619	9.95998e-39	3	SUCLG2
1.19177e-42	0.355682	0.664	0.483	4.1974e-38	3	IL6R
2.78706e-42	0.378735	0.545	0.377	9.81602e-38	3	LFNG
1.08785e-41	0.357727	0.358	0.212	3.83142e-37	3	PLEKHF2
2.44791e-40	0.431997	0.856	0.766	8.62153e-36	3	SRPK2
1.24837e-39	0.360925	0.778	0.621	4.39678e-35	3	TAB2
3.03916e-38	0.354933	0.733	0.581	1.07039e-33	3	LOC106999943
5.66366e-38	0.466348	0.66	0.51	1.99474e-33	3	ATXN7L1
2.5127e-37	0.370932	0.62	0.467	8.84973e-33	3	OTUD5
1.30331e-36	0.315497	0.352	0.209	4.59025e-32	3	SNX9
3.08282e-36	0.45244	0.461	0.316	1.08577e-31	3	LDLRAD4
3.74614e-36	0.323591	0.775	0.609	1.31939e-31	3	MAP3K5
4.4381e-36	0.296704	0.788	0.62	1.5631e-31	3	CD44
7.88622e-36	0.303706	0.746	0.628	2.77753e-31	3	RCSD1
5.92972e-35	0.3366	0.802	0.688	2.08845e-30	3	FAM107B
4.50903e-33	0.355428	0.96	0.899	1.58808e-28	3	FOXN3
5.17643e-33	0.318936	0.471	0.323	1.82314e-28	3	LOC100430028
6.21872e-33	0.3113	0.68	0.556	2.19023e-28	3	CUTA
2.92553e-32	0.298817	0.344	0.214	1.03037e-27	3	TTC7A
4.35863e-32	0.322083	0.75	0.608	1.53511e-27	3	IPCEF1
4.9584e-32	0.343948	0.798	0.66	1.74635e-27	3	TXK
7.74113e-32	0.344901	0.578	0.424	2.72643e-27	3	GPR183
9.23703e-32	0.304341	0.848	0.779	3.25328e-27	3	GIMAP1
5.35013e-31	0.341002	0.573	0.42	1.88431e-26	3	FAM117B
5.86247e-31	0.276984	0.911	0.844	2.06476e-26	3	ARID4B
3.03575e-30	0.507845	0.513	0.378	1.06919e-25	3	PHACTR2
3.28703e-30	0.312914	0.751	0.633	1.15769e-25	3	SPPL3
4.94616e-30	0.264396	0.4	0.264	1.74204e-25	3	R3HDM4
2.92659e-29	0.306383	0.681	0.529	1.03074e-24	3	OXR1
6.05989e-29	0.329511	0.736	0.588	2.13429e-24	3	IL6ST
6.48885e-29	0.279963	0.979	0.957	2.28537e-24	3	KLF2
8.52168e-29	0.315036	0.699	0.587	3.00134e-24	3	ALDOA
1.75667e-27	0.255353	0.472	0.335	6.18698e-23	3	IL10RA
2.07376e-27	0.334645	0.74	0.626	7.30378e-23	3	SLC12A6
2.07528e-27	0.326625	0.619	0.493	7.30913e-23	3	LRIG1
3.8489e-27	0.299549	0.875	0.808	1.35558e-22	3	LOC114672190
6.49582e-27	0.252007	0.967	0.921	2.28783e-22	3	ANKRD12
1.00126e-26	0.346316	0.853	0.799	3.52643e-22	3	XYLT1
1.15757e-26	0.298872	0.499	0.358	4.07697e-22	3	GPRIN3
1.65368e-26	0.379644	0.982	0.949	5.82425e-22	3	ACTG1
3.01484e-26	0.258792	0.979	0.961	1.06183e-21	3	FOXP1
3.96611e-26	0.295433	0.592	0.475	1.39686e-21	3	LOC100425941
4.5757e-26	0.294037	0.625	0.493	1.61156e-21	3	ITPKB
6.81138e-26	0.309667	0.516	0.392	2.39897e-21	3	GPR174
1.64582e-25	0.475756	0.291	0.183	5.79656e-21	3	NCALD
3.32688e-25	0.343038	0.566	0.441	1.17173e-20	3	PELI1
4.27306e-25	0.290295	0.446	0.327	1.50497e-20	3	RAB43
1.99969e-24	0.336905	0.414	0.293	7.04292e-20	3	MT2A
6.0032e-24	0.270775	0.94	0.895	2.11433e-19	3	MYCBP2
6.39516e-24	0.2597	0.312	0.204	2.25238e-19	3	P2RY10
6.64488e-24	0.321221	0.39	0.27	2.34033e-19	3	NABP1
6.89864e-24	0.260963	0.294	0.188	2.4297e-19	3	CD59
1.54904e-23	0.266106	0.585	0.465	5.45573e-19	3	IL10RB
2.37773e-23	0.263526	0.487	0.369	8.37438e-19	3	CDC25B
3.22605e-23	0.267077	0.967	0.883	1.13622e-18	3	LTB
4.19673e-23	0.272895	0.373	0.256	1.47809e-18	3	NFATC1
4.72835e-23	0.282032	0.816	0.728	1.66533e-18	3	MAP3K1
4.75265e-23	0.310744	0.531	0.41	1.67388e-18	3	PLEKHG1
2.08382e-22	0.278201	0.909	0.866	7.3392e-18	3	FYN
5.69975e-22	0.324093	0.581	0.465	2.00745e-17	3	ZFP36
7.9045e-22	0.279589	0.829	0.738	2.78396e-17	3	LNPEP
1.52058e-21	0.324576	0.503	0.382	5.35547e-17	3	BICDL1
3.24401e-21	0.260517	0.594	0.473	1.14254e-16	3	TTC39C
4.7242e-21	0.282111	0.655	0.536	1.66386e-16	3	SLC4A7
1.56179e-20	0.263515	0.665	0.563	5.50062e-16	3	TSPO
4.49056e-20	0.324574	0.801	0.7	1.58158e-15	3	JUNB
6.23083e-20	0.253037	0.306	0.209	2.1945e-15	3	CBLL1
6.75513e-20	0.338639	0.257	0.165	2.37916e-15	3	ARMC2
1.56469e-19	0.260025	0.413	0.305	5.51084e-15	3	CTSH
1.90712e-19	0.272664	0.439	0.333	6.71688e-15	3	FAM118A
4.84131e-19	0.254721	0.272	0.179	1.70511e-14	3	KLF8
1.56344e-18	0.262195	0.549	0.434	5.50645e-14	3	IER2
1.74481e-18	0.265647	0.413	0.308	6.1452e-14	3	REEP3
4.70861e-18	0.263079	0.824	0.748	1.65837e-13	3	FBXO34
8.44637e-18	0.413499	0.366	0.27	2.97481e-13	3	IFI27
1.21277e-17	0.330557	0.579	0.469	4.27137e-13	3	KCNQ5
1.37202e-17	0.284815	0.6	0.501	4.83227e-13	3	SELL
1.49357e-17	0.292275	0.83	0.766	5.26035e-13	3	TLK1
6.03619e-17	0.267693	0.643	0.579	2.12594e-12	3	CASP12
1.7833e-16	0.265722	0.31	0.218	6.28079e-12	3	PHLPP1
9.16515e-15	0.305167	0.51	0.422	3.22797e-10	3	AHI1
4.44004e-14	0.302882	0.497	0.405	1.56378e-09	3	RPS6KA5
9.54226e-14	0.279001	0.651	0.579	3.36078e-09	3	NFAT5
1.263e-13	0.271963	0.504	0.404	4.44829e-09	3	GLCCI1
1.4723e-13	0.588368	0.523	0.458	5.18543e-09	3	DNM3
3.98696e-13	0.251728	0.29	0.209	1.40421e-08	3	SLA
1.42315e-12	0.256016	0.429	0.343	5.01234e-08	3	EPSTI1
6.8059e-12	0.378278	0.472	0.406	2.39704e-07	3	ITGB1
9.55779e-09	0.26095	0.36	0.292	0.000336625	3	SYNE2
1.02743e-08	0.287844	0.255	0.198	0.000361861	3	LOC694064

## Sheet: Cluster 4
p_val	avg_log2FC	pct.1	pct.2	p_val_adj	cluster	gene
0	3.37261	0.982	0.489	0	4	STMN1
0	2.6805	0.933	0.53	0	4	TUBA1B
0	2.56269	0.959	0.393	0	4	HMGB2
0	2.3608	1	0.36	0	4	S100A4
0	2.33468	0.998	0.183	0	4	NKG7
0	2.27152	0.981	0.217	0	4	LOC106996415
0	2.16865	0.996	0.188	0	4	GZMB
0	2.06238	0.88	0.134	0	4	PCNA
0	2.03445	0.982	0.196	0	4	C11H12orf75
0	1.99876	0.958	0.149	0	4	GZMH
0	1.95593	0.975	0.207	0	4	TGFBR3
0	1.89215	0.971	0.165	0	4	ZEB2
0	1.86083	0.69	0.009	0	4	PCLAF
0	1.82577	0.937	0.153	0	4	GZMM
0	1.81613	0.581	0.007	0	4	DIAPH3
0	1.80008	0.592	0.018	0	4	MKI67
0	1.74977	0.93	0.248	0	4	LOC706608
0	1.73541	0.896	0.14	0	4	LOC114671905
0	1.68763	0.957	0.412	0	4	RPA3
0	1.65684	0.998	0.825	0	4	CRIP1
0	1.62557	0.978	0.18	0	4	CST7
0	1.61584	0.873	0.145	0	4	MAMU-DRB1
0	1.6117	0.998	0.784	0	4	S100A10
0	1.60985	0.76	0.142	0	4	ATAD2
0	1.60362	0.996	0.84	0	4	GAPDH
0	1.58146	0.8	0.117	0	4	CCL5
0	1.56443	0.949	0.176	0	4	RGS9
0	1.55907	0.887	0.149	0	4	LOC106993126
0	1.54759	0.838	0.103	0	4	MCM7
0	1.54575	0.666	0.044	0	4	CENPP
0	1.5215	0.874	0.128	0	4	APOBEC3G
0	1.51328	0.854	0.19	0	4	HELLS
0	1.51296	0.985	0.506	0	4	LY6E-1
0	1.5052	0.803	0.024	0	4	MCM3
0	1.47524	0.898	0.242	0	4	DNMT1
0	1.46948	0.786	0.184	0	4	CD74
0	1.44762	0.857	0.134	0	4	PPP2R2B
0	1.44213	0.892	0.157	0	4	HOPX
0	1.4363	0.732	0.113	0	4	MAMU-DRA
0	1.41762	0.656	0.046	0	4	CKS2
0	1.40803	0.435	0.01	0	4	RRM2
0	1.40327	0.782	0.077	0	4	ITGB3BP
0	1.38602	0.861	0.251	0	4	SIVA1
0	1.3817	0.974	0.388	0	4	DNAJC1
0	1.38016	0.703	0.102	0	4	RFC3
0	1.37464	0.783	0.147	0	4	CKS1B
0	1.36501	0.856	0.155	0	4	CLIC5
0	1.36415	0.854	0.314	0	4	SLBP
0	1.35774	0.743	0.112	0	4	POLA1
0	1.34903	0.576	0.012	0	4	CDK1
0	1.34016	0.768	0.032	0	4	MCM5
0	1.33866	0.704	0.158	0	4	EZH2
0	1.33262	0.995	0.941	0	4	SH3BGRL3
0	1.32749	0.984	0.651	0	4	SNRPB
0	1.32663	0.943	0.252	0	4	RAP1GAP2
0	1.3138	0.702	0.054	0	4	BRCA1
0	1.30819	0.999	0.971	0	4	LOC705671
0	1.30463	0.7	0.071	0	4	SMC2
0	1.29813	0.729	0.008	0	4	CDT1
0	1.28733	0.781	0.105	0	4	LOC114669810
0	1.27647	0.967	0.629	0	4	DEK
0	1.27626	0.991	0.724	0	4	S100A11
0	1.27294	0.85	0.12	0	4	CX3CR1
0	1.26913	0.996	0.836	0	4	EMP3
0	1.26344	0.988	0.777	0	4	GPX4
0	1.24753	0.605	0.028	0	4	BRIP1
0	1.22799	0.907	0.267	0	4	LOC106992647
0	1.22211	0.768	0.115	0	4	CLEC12A
0	1.22144	0.42	0.034	0	4	TOP2A
0	1.21905	0.623	0.04	0	4	ZGRF1
0	1.21721	0.784	0.146	0	4	GNLY
0	1.20782	0.691	0.047	0	4	CHEK1
0	1.18824	0.73	0.101	0	4	GPR141
0	1.18792	0.998	0.928	0	4	PFN1
0	1.18588	0.53	0.003	0	4	SPC25
0	1.18531	0.691	0.133	0	4	LMNB1
0	1.1842	0.826	0.24	0	4	CENPX
0	1.16811	0.779	0.141	0	4	JAKMIP2
0	1.16041	0.72	0.097	0	4	DOCK5
0	1.15749	0.459	0.013	0	4	NUSAP1
0	1.15425	0.67	0.089	0	4	MMS22L
0	1.15206	0.636	0.006	0	4	E2F1
0	1.14992	0.889	0.211	0	4	LGALS3
0	1.13736	0.688	0.118	0	4	PTTG1
0	1.13211	0.648	0.022	0	4	MCM4
0	1.12909	0.779	0.223	0	4	LOC705095
0	1.12614	0.924	0.327	0	4	SSBP4
0	1.12037	0.887	0.329	0	4	IDH2
0	1.11642	0.986	0.743	0	4	PSMB9
0	1.1134	0.562	0.105	0	4	H2AFX
0	1.10592	0.562	0.004	0	4	RAD51AP1
0	1.10517	0.618	0.042	0	4	NCAPG2
0	1.09152	0.564	0.004	0	4	CLSPN
0	1.08827	0.779	0.197	0	4	SNTB1
0	1.08764	0.583	0.079	0	4	MAMU-DQA1
0	1.0829	0.666	0.118	0	4	FANCI
0	1.0817	0.454	0.005	0	4	TYMS
0	1.07077	0.737	0.119	0	4	TPD52
0	1.06882	0.535	0.02	0	4	DTL
0	1.0681	0.998	0.985	0	4	CD52
0	1.06497	0.756	0.113	0	4	NKG2D
0	1.06259	0.672	0.08	0	4	KLRF1
0	1.06163	0.779	0.176	0	4	SLC2A4RG
0	1.05821	0.81	0.184	0	4	CCDC167
0	1.054	0.459	0.011	0	4	KIF11
0	1.03761	0.772	0.16	0	4	LOC114675357
0	1.0306	0.602	0.021	0	4	CENPU
0	1.02985	0.646	0.044	0	4	MCM6
0	1.02885	0.508	0.012	0	4	BRCA2
0	1.0264	0.766	0.143	0	4	PRF1
0	1.02099	0.702	0.191	0	4	NSD2
0	1.01952	0.829	0.259	0	4	LSM2
0	1.01917	0.757	0.226	0	4	SPN
0	1.00837	0.718	0.114	0	4	GOLIM4
0	1.00747	0.779	0.223	0	4	TMSB15B
0	0.997712	0.849	0.273	0	4	TESC
0	0.989653	0.807	0.236	0	4	DHRS7
0	0.989435	0.657	0.117	0	4	WDR76
0	0.986328	0.57	0.011	0	4	KNTC1
0	0.98169	0.997	0.941	0	4	CFL1
0	0.980481	0.844	0.237	0	4	SYTL2
0	0.980406	0.585	0.03	0	4	POLE
0	0.980101	0.77	0.216	0	4	CPD
0	0.978474	0.69	0.112	0	4	TFDP1
0	0.97755	0.786	0.246	0	4	CISD3
0	0.965689	0.536	0.011	0	4	CENPW
0	0.958805	0.585	0.045	0	4	WDHD1
0	0.953852	0.604	0.118	0	4	IL7
0	0.934348	0.415	0.01	0	4	CIT
0	0.927403	0.595	0.054	0	4	LOC716070
0	0.925337	0.455	0.011	0	4	CENPM
0	0.925051	0.572	0.078	0	4	CLECL1
0	0.924233	0.604	0.061	0	4	RNASEH2A
0	0.92179	0.771	0.191	0	4	EFHD2
0	0.913345	0.537	0.058	0	4	ZNF367
0	0.901187	0.552	0.051	0	4	HBA1
0	0.89681	0.762	0.199	0	4	APOBEC3H
0	0.890439	0.501	0.039	0	4	POLQ
0	0.888785	0.556	0.059	0	4	CENPO
0	0.876314	0.782	0.193	0	4	SEPTIN11
0	0.861936	0.413	0.009	0	4	KIF15
0	0.860477	0.67	0.166	0	4	ALYREF
0	0.857537	0.613	0.078	0	4	TSPAN2
0	0.856226	0.438	0.011	0	4	NUF2
0	0.844396	0.583	0.093	0	4	LIG1
0	0.835501	0.725	0.201	0	4	PYCARD
0	0.826535	0.477	0.015	0	4	UHRF1
0	0.825988	0.404	0.007	0	4	MELK
0	0.823892	0.459	0.033	0	4	KIFC1
0	0.822938	0.518	0.067	0	4	MAMU-DRB5
0	0.814626	0.737	0.191	0	4	ACTN4
0	0.811668	0.651	0.161	0	4	ODC1
0	0.809457	0.647	0.156	0	4	FDPS
0	0.804095	0.678	0.171	0	4	CDK4
0	0.803377	0.421	0.003	0	4	TK1
0	0.801156	0.521	0.011	0	4	GINS2
0	0.7978	0.403	0.02	0	4	NCAPG
0	0.787789	0.395	0.033	0	4	C1H1orf21
0	0.785098	0.539	0.04	0	4	CHAF1A
0	0.781439	0.659	0.164	0	4	DNAJC9
0	0.769352	0.567	0.109	0	4	IL18
0	0.765327	0.569	0.088	0	4	DTYMK
0	0.746723	0.616	0.109	0	4	TBX21
0	0.745825	0.443	0.044	0	4	NDC80
0	0.745579	0.479	0.029	0	4	CDC45
0	0.743684	0.612	0.14	0	4	APOBEC3C
0	0.737229	0.269	0.005	0	4	ASPM
0	0.735536	0.285	0.03	0	4	LOC701826
0	0.735487	0.5	0.04	0	4	GMNN
0	0.734272	0.531	0.088	0	4	MAMU-DQB1
0	0.731805	0.424	0.023	0	4	KNL1
0	0.728666	0.526	0.063	0	4	ATAD5
0	0.726814	0.344	0.003	0	4	BIRC5
0	0.725787	0.591	0.122	0	4	PRIM1
0	0.724872	0.638	0.148	0	4	PHF19
0	0.72362	0.459	0.019	0	4	POLE2
0	0.723451	0.472	0.03	0	4	WEE1
0	0.719547	0.435	0.069	0	4	KIF22
0	0.718748	0.529	0.087	0	4	SAMD3
0	0.718495	0.419	0.018	0	4	BARD1
0	0.714313	0.525	0.071	0	4	MTHFD1
0	0.711195	0.432	0.072	0	4	SPINK2
0	0.710577	0.472	0.058	0	4	CMA1
0	0.70663	0.518	0.064	0	4	LOC719437
0	0.703972	0.388	0.032	0	4	CCNE2
0	0.703599	0.437	0.01	0	4	MCM2
0	0.701273	0.386	0.002	0	4	SLC29A1
0	0.694765	0.381	0.058	0	4	FBXO5
0	0.683685	0.374	0.002	0	4	PKMYT1
0	0.68351	0.339	0.005	0	4	BUB1B
0	0.681893	0.407	0.049	0	4	CD8A
0	0.665018	0.432	0.055	0	4	SPATS2L
0	0.662556	0.36	0.024	0	4	CENPE
0	0.657049	0.406	0.021	0	4	MCM10
0	0.654159	0.543	0.1	0	4	ACOT7
0	0.653902	0.494	0.073	0	4	LOC106995333
0	0.653193	0.491	0.086	0	4	MAMU-DPB
0	0.651327	0.511	0.092	0	4	CEP78
0	0.646895	0.551	0.111	0	4	RFC4
0	0.645462	0.369	0.017	0	4	LOC106994082
0	0.640598	0.395	0.06	0	4	ST8SIA1
0	0.640593	0.509	0.076	0	4	MATK
0	0.639477	0.557	0.104	0	4	PRR5L
0	0.636269	0.397	0.019	0	4	CENPN
0	0.63543	0.273	0.003	0	4	UBE2C
0	0.630781	0.42	0.053	0	4	FGFBP2
0	0.628063	0.442	0.075	0	4	CLIC4
0	0.623508	0.368	0.008	0	4	MYBL2
0	0.619435	0.382	0.035	0	4	HBA
0	0.61718	0.447	0.049	0	4	ANKRD9
0	0.617075	0.527	0.096	0	4	LOC100430627
0	0.613262	0.471	0.059	0	4	PLEK
0	0.61196	0.338	0.003	0	4	MND1
0	0.611875	0.38	0.01	0	4	RAD51
0	0.611586	0.491	0.091	0	4	JAKMIP1
0	0.608819	0.462	0.06	0	4	POLA2
0	0.608085	0.373	0.02	0	4	LOC106999862
0	0.60671	0.296	0.021	0	4	CCNA2
0	0.604938	0.33	0.006	0	4	CDC6
0	0.603535	0.445	0.074	0	4	GALNT3
0	0.596786	0.39	0.035	0	4	GPR153
0	0.596557	0.463	0.064	0	4	ORC6
0	0.595511	0.406	0.025	0	4	NRM
0	0.585213	0.337	0.019	0	4	TPX2
0	0.566242	0.436	0.068	0	4	FANCA
0	0.56216	0.443	0.067	0	4	NCAPH2
0	0.546422	0.396	0.058	0	4	FAM49A
0	0.5444	0.377	0.055	0	4	SLC11A1
0	0.542551	0.444	0.071	0	4	HIRIP3
0	0.542413	0.349	0.008	0	4	HBQ1
0	0.541015	0.368	0.021	0	4	POC1A
0	0.540982	0.436	0.072	0	4	PDLIM1
0	0.530459	0.391	0.052	0	4	ASF1B
0	0.522355	0.381	0.05	0	4	ADGRG1
0	0.521422	0.325	0.017	0	4	ARHGAP11A
0	0.519319	0.365	0.049	0	4	RBBP8
0	0.513325	0.434	0.071	0	4	MCOLN2
0	0.503693	0.28	0.01	0	4	MXD3
0	0.501331	0.278	0.004	0	4	KIF4A
0	0.498288	0.281	0.015	0	4	GTSE1
0	0.491044	0.363	0.05	0	4	GINS1
0	0.490674	0.266	0.004	0	4	DLGAP5
0	0.487178	0.311	0.02	0	4	FADS1
0	0.481098	0.3	0.027	0	4	WDR62
0	0.476891	0.349	0.03	0	4	DDX11
0	0.474103	0.302	0.031	0	4	AFAP1L2
0	0.473257	0.342	0.016	0	4	FEN1
0	0.47181	0.3	0.004	0	4	LOC114674393
0	0.470885	0.287	0.007	0	4	LOC709988
0	0.469498	0.289	0.021	0	4	CDKN3
0	0.465999	0.275	0.001	0	4	FAM111B
0	0.464561	0.275	0.002	0	4	CDCA5
0	0.462219	0.307	0.032	0	4	FOXD1
0	0.457808	0.287	0.017	0	4	CKAP2L
0	0.453827	0.322	0.022	0	4	TCF19
0	0.447888	0.29	0.004	0	4	CENPH
0	0.446696	0.279	0.01	0	4	TTK
0	0.435701	0.371	0.045	0	4	ABI3
0	0.435642	0.284	0.024	0	4	LOC711440
0	0.435374	0.257	0.003	0	4	FOXM1
0	0.424376	0.275	0.006	0	4	SPC24
0	0.415235	0.297	0.01	0	4	CENPT
0	0.411853	0.327	0.037	0	4	TIPIN
0	0.41181	0.343	0.043	0	4	LRR1
0	0.41166	0.26	0.02	0	4	HMGB3
0	0.410678	0.252	0.004	0	4	PARPBP
0	0.408916	0.272	0.007	0	4	ZWINT
0	0.400135	0.302	0.026	0	4	APOBEC3D
0	0.399745	0.285	0.024	0	4	CENPJ
0	0.399346	0.262	0.007	0	4	RAD54L
0	0.394295	0.295	0.034	0	4	TTF2
0	0.391478	0.288	0.014	0	4	UBE2T
0	0.389056	0.29	0.03	0	4	ETV7
0	0.388673	0.309	0.037	0	4	PCDH1
0	0.372561	0.252	0.011	0	4	ORC1
0	0.351121	0.253	0.019	0	4	CDCA8
0	0.33072	0.267	0.028	0	4	RFC5
1.04274e-307	0.411729	0.329	0.043	3.67252e-303	4	LOC697805
3.76895e-306	0.336095	0.272	0.029	1.32742e-301	4	PLK4
2.55824e-305	1.14099	0.948	0.507	9.01012e-301	4	TXN
1.56763e-304	0.448421	0.347	0.047	5.52119e-300	4	PLCG2
2.83977e-304	0.591012	0.497	0.095	1.00017e-299	4	BRI3BP
3.80724e-303	0.71493	0.636	0.152	1.34091e-298	4	BLVRB
7.43207e-303	0.464741	0.356	0.051	2.61758e-298	4	NCAPD2
1.50717e-302	0.676356	0.591	0.133	5.30826e-298	4	DSN1
5.32735e-302	1.36458	0.86	0.337	1.87629e-297	4	RAD51B
8.20783e-297	1.30434	0.995	0.672	2.8908e-292	4	HCST
4.93349e-296	0.533726	0.311	0.041	1.73758e-291	4	PRC1
2.24758e-295	1.15721	0.867	0.384	7.91597e-291	4	PPDPF
2.74539e-295	1.36045	0.907	0.481	9.66926e-291	4	DUT
6.65923e-295	0.934754	0.891	0.303	2.34538e-290	4	MYO1F
2.18031e-294	0.416935	0.299	0.037	7.67904e-290	4	NCR3
2.39889e-293	1.01271	0.85	0.296	8.44887e-289	4	RAB27A
6.67797e-292	0.453006	0.32	0.043	2.35198e-287	4	FSD1L
9.87312e-292	0.507806	0.406	0.067	3.47731e-287	4	ZFYVE28
2.98598e-290	0.526254	0.422	0.072	1.05166e-285	4	LOC100426632
1.2786e-288	0.386758	0.258	0.028	4.50322e-284	4	CIP2A
8.25248e-287	0.818768	0.999	0.972	2.90652e-282	4	CALM1
2.4276e-285	1.37805	0.983	0.742	8.55001e-281	4	H2AFZ
7.06518e-285	1.28601	0.773	0.275	2.48835e-280	4	SMC4
3.37489e-284	1.11249	0.979	0.525	1.18863e-279	4	ANXA2
3.86474e-284	0.331099	0.265	0.03	1.36116e-279	4	ZWILCH
5.37219e-283	0.504186	0.348	0.051	1.89208e-278	4	CD109
3.3685e-282	0.932803	0.813	0.29	1.18639e-277	4	VRK1
6.85223e-279	0.612446	0.281	0.035	2.41335e-274	4	KLRD1
1.21882e-278	0.74766	0.646	0.165	4.2927e-274	4	HEG1
2.29351e-277	1.3621	0.99	0.834	8.07775e-273	4	HMGB1
3.02244e-276	0.399649	0.329	0.047	1.0645e-271	4	RFC2
5.15708e-275	0.729068	0.654	0.174	1.81632e-270	4	TMEM109
5.29021e-272	0.779924	0.559	0.129	1.86321e-267	4	FAM129A
2.32648e-270	0.715215	0.546	0.125	8.19387e-266	4	SRGAP2
3.74177e-269	0.335245	0.272	0.033	1.31785e-264	4	MTFR2
6.69779e-267	0.446731	0.357	0.057	2.35896e-262	4	PDE4A
5.04682e-266	2.1702	0.879	0.492	1.77749e-261	4	TUBB
2.40422e-265	1.2439	0.964	0.55	8.46765e-261	4	ANXA1
1.14679e-264	0.567714	0.4	0.07	4.03898e-260	4	CSF1
9.16541e-264	0.963049	0.853	0.349	3.22806e-259	4	HNRNPAB
1.80276e-263	0.549777	0.481	0.099	6.34932e-259	4	VOPP1
6.13488e-263	0.491569	0.388	0.067	2.1607e-258	4	SASS6
2.02567e-262	0.86629	0.829	0.287	7.13442e-258	4	TNFRSF1B
6.37282e-262	0.927246	0.865	0.372	2.24451e-257	4	LSM3
1.90022e-260	0.695822	0.646	0.177	6.69257e-256	4	SDF2L1
4.69718e-260	0.341307	0.262	0.032	1.65435e-255	4	MCM8
5.73092e-260	1.29496	0.82	0.366	2.01843e-255	4	LAMP3
8.49186e-259	1.0207	0.998	0.963	2.99083e-254	4	PTMA
2.35406e-258	0.940362	0.883	0.404	8.29101e-254	4	SNRPG
1.16317e-257	0.94851	0.789	0.288	4.09668e-253	4	RRM1
2.31575e-257	1.00257	0.977	0.617	8.15607e-253	4	GLIPR2
1.32412e-256	1.24676	0.978	0.748	4.66355e-252	4	LOC705636
1.4374e-255	0.955196	0.855	0.376	5.06251e-251	4	RANBP1
2.78299e-254	0.446458	0.3	0.043	9.80168e-250	4	FANCL
1.17886e-253	0.512522	0.37	0.063	4.15194e-249	4	SLCO4C1
1.23893e-253	0.636607	0.562	0.134	4.3635e-249	4	PRDM1
3.46647e-253	0.648021	0.603	0.154	1.22089e-248	4	FAS
9.38291e-253	0.610789	0.443	0.088	3.30466e-248	4	KLRG1
1.71304e-252	0.593364	0.6	0.152	6.03332e-248	4	PDZD11
5.14706e-252	0.986841	0.967	0.639	1.81279e-247	4	COX8A
8.4541e-251	0.535284	0.314	0.048	2.97753e-246	4	SH3RF1
5.63033e-250	0.383054	0.321	0.049	1.983e-245	4	WDR34
1.02678e-249	0.329254	0.262	0.033	3.61633e-245	4	CEP152
3.67436e-249	0.380781	0.327	0.051	1.29411e-244	4	RGS3
9.03744e-248	0.705331	0.621	0.168	3.18299e-243	4	BHLHE40
9.90486e-248	0.465631	0.394	0.072	3.48849e-243	4	IKBIP
1.93158e-245	1.02968	0.889	0.388	6.80303e-241	4	PTPN22
2.16761e-244	0.802035	0.732	0.241	7.63431e-240	4	ATP1B3
6.1556e-244	0.590907	0.552	0.137	2.168e-239	4	DPM2
7.84693e-244	0.415051	0.329	0.053	2.76369e-239	4	SAC3D1
1.40111e-243	1.00738	0.828	0.335	4.93472e-239	4	PLP2
3.18172e-243	0.674601	0.575	0.151	1.1206e-238	4	POLD3
1.02993e-242	0.772096	0.729	0.241	3.62741e-238	4	SUMO3
2.53279e-241	0.976253	0.93	0.466	8.92048e-237	4	ITGB2
2.59358e-241	1.1149	0.908	0.457	9.13459e-237	4	PARP8
5.05639e-241	0.588599	0.461	0.098	1.78086e-236	4	FRY
5.47997e-241	1.03445	0.952	0.442	1.93004e-236	4	LOC106993196
6.64117e-241	0.475681	0.407	0.078	2.33902e-236	4	ALOX5AP
6.61859e-240	1.20164	0.921	0.488	2.33107e-235	4	LOC114677644
3.72601e-238	0.532545	0.413	0.082	1.3123e-233	4	CDC7
8.99789e-238	0.979848	0.389	0.074	3.16906e-233	4	CACNA1B
1.30999e-237	0.668246	0.62	0.173	4.6138e-233	4	BCAP29
5.04129e-237	0.565391	0.538	0.13	1.77554e-232	4	RECQL
8.61991e-237	0.449341	0.374	0.067	3.03593e-232	4	NHSL2
6.45015e-236	1.18454	0.95	0.5	2.27174e-231	4	PDE3B
1.27576e-235	0.73695	0.37	0.071	4.49324e-231	4	CENPF
1.37712e-235	0.461576	0.397	0.076	4.8502e-231	4	RHOC
2.0792e-235	0.958057	0.95	0.447	7.32293e-231	4	PTPRJ
2.58073e-233	0.493745	0.472	0.104	9.08934e-229	4	MAD2L2
4.44591e-232	0.844304	0.83	0.352	1.56585e-227	4	SNRPD1
5.0776e-232	0.476251	0.427	0.088	1.78833e-227	4	TCIRG1
2.59659e-231	0.728842	0.659	0.204	9.14518e-227	4	DCTPP1
5.85041e-231	0.669998	0.592	0.163	2.06052e-226	4	NUDT1
2.15431e-229	0.81627	0.999	0.907	7.58748e-225	4	RAP1B
5.01586e-229	0.542327	0.517	0.126	1.76659e-224	4	POLD2
4.14917e-228	1.01927	0.824	0.349	1.46134e-223	4	PRIM2
5.25317e-228	0.45537	0.43	0.09	1.85016e-223	4	HAUS4
8.24533e-228	0.959377	0.955	0.476	2.904e-223	4	PPP3CA
9.54668e-228	0.831671	0.85	0.36	3.36234e-223	4	IER3IP1
3.04723e-226	0.880789	0.976	0.701	1.07324e-221	4	TPM3
6.01956e-226	1.02753	0.945	0.486	2.12009e-221	4	STAT4
7.41917e-226	0.516943	0.425	0.088	2.61303e-221	4	LOC106999823
1.59538e-225	1.03534	0.946	0.502	5.61892e-221	4	SYTL3
1.65426e-225	0.661396	0.64	0.191	5.82629e-221	4	BOLA3
2.47665e-225	0.867771	0.995	0.863	8.72275e-221	4	MYL6
4.5573e-224	0.90578	0.852	0.347	1.60508e-219	4	ARAP2
2.19029e-223	0.696336	0.702	0.222	7.71419e-219	4	RUNX3
1.34009e-222	0.873355	0.975	0.736	4.71979e-218	4	YBX1
7.46318e-221	0.934858	0.825	0.325	2.62853e-216	4	TMTC2
9.35027e-221	0.544754	0.5	0.122	3.29316e-216	4	LOC107000378
1.52908e-220	0.393986	0.36	0.067	5.38542e-216	4	TEX30
5.6605e-220	0.652218	0.67	0.206	1.99363e-215	4	TPM4
3.03748e-219	0.897235	0.977	0.619	1.0698e-214	4	LCP1
6.98519e-218	0.574602	0.567	0.152	2.46018e-213	4	AKT1
1.68276e-215	0.661003	0.519	0.135	5.92667e-211	4	EMB
2.62718e-215	0.805712	0.91	0.499	9.25293e-211	4	PSMB6
1.34823e-214	0.436196	0.377	0.075	4.74847e-210	4	LMNB2
1.38616e-211	0.705256	0.578	0.169	4.88207e-207	4	LIN54
7.60888e-211	0.733056	0.724	0.246	2.67985e-206	4	SLA2
1.09897e-210	0.308654	0.259	0.038	3.87058e-206	4	F2R
1.43083e-210	0.389266	0.322	0.057	5.03938e-206	4	STIL
1.98672e-210	0.531098	0.396	0.083	6.99722e-206	4	DAPK2
5.78764e-210	0.626735	0.557	0.153	2.03841e-205	4	LOC701439
5.95192e-210	0.684018	0.477	0.118	2.09626e-205	4	HIP1
8.10393e-210	0.752698	0.994	0.926	2.8542e-205	4	ARPC2
2.43326e-209	0.977967	0.971	0.616	8.56993e-205	4	SLCO3A1
3.99533e-209	0.583414	0.598	0.174	1.40716e-204	4	PGP
4.18708e-209	0.400524	0.317	0.056	1.47469e-204	4	RAD18
4.35374e-209	0.782088	0.988	0.938	1.53339e-204	4	UBB
7.14386e-209	0.621215	0.613	0.178	2.51607e-204	4	USP28
5.12927e-208	2.58276	0.704	0.277	1.80653e-203	4	LOC114677671
5.17022e-208	0.81738	0.854	0.375	1.82095e-203	4	MYO1G
2.52867e-207	0.903915	0.952	0.655	8.90597e-203	4	RBM3
4.88133e-207	0.865643	0.992	0.821	1.71921e-202	4	EML4
1.8162e-206	0.388055	0.335	0.062	6.39667e-202	4	LRRC42
4.24542e-206	0.394288	0.336	0.062	1.49524e-201	4	GFI1
7.26335e-206	0.748719	0.63	0.198	2.55815e-201	4	MAST2
1.02348e-205	0.695503	0.996	0.945	3.60469e-201	4	SERF2
1.15029e-205	0.836777	0.996	0.821	4.05131e-201	4	SRGN
3.61731e-205	0.703576	0.539	0.152	1.27402e-200	4	KIF20B
1.67256e-204	0.721891	0.698	0.243	5.89076e-200	4	RNASEH2B
2.72858e-204	0.923588	0.843	0.382	9.61006e-200	4	FANCC
4.52718e-204	1.05954	0.913	0.569	1.59447e-199	4	LOC694887
6.78117e-204	0.485447	0.479	0.117	2.38833e-199	4	LOC719262
1.17031e-203	0.466556	0.357	0.072	4.12182e-199	4	LOC708492
9.27473e-203	0.813302	0.99	0.897	3.26656e-198	4	HSP90AA1
1.82924e-202	0.885659	0.941	0.574	6.44257e-198	4	LDHA
5.56874e-202	0.601568	0.56	0.16	1.96131e-197	4	TRAPPC6A
7.37175e-202	0.289034	0.265	0.041	2.59633e-197	4	AGFG2
1.57966e-201	0.782008	0.626	0.209	5.56356e-197	4	NCAPD3
1.96899e-201	0.961359	0.81	0.359	6.93478e-197	4	TTC3
3.02512e-200	1.08955	0.989	0.819	1.06545e-195	4	VIM
5.48112e-200	0.725125	0.685	0.242	1.93045e-195	4	USP1
9.07594e-200	0.988822	0.875	0.41	3.19655e-195	4	LOC106997893
1.08891e-199	1.22954	0.652	0.255	3.83515e-195	4	TUBB4B
1.38316e-199	0.89951	0.952	0.612	4.8715e-195	4	UCP2
3.9975e-199	0.56522	0.596	0.174	1.40792e-194	4	CD58
4.86411e-199	0.592058	0.538	0.151	1.71314e-194	4	C6orf125
9.08515e-199	0.402914	0.36	0.072	3.19979e-194	4	DPYSL2
1.24308e-198	0.38306	0.368	0.075	4.37813e-194	4	MTHFD2
3.03274e-198	0.437901	0.341	0.066	1.06813e-193	4	GK5
4.6059e-198	0.762354	0.837	0.355	1.6222e-193	4	ORAI1
7.56596e-198	0.447649	0.309	0.057	2.66473e-193	4	LOC710110
1.11111e-197	1.02149	0.824	0.402	3.91333e-193	4	BAX
2.31393e-197	0.552111	0.556	0.157	8.14968e-193	4	APMAP
2.85018e-197	0.630731	0.641	0.195	1.00383e-192	4	ADAM23
6.00217e-197	0.788996	0.975	0.802	2.11396e-192	4	SUMO2
1.01844e-196	0.69666	0.729	0.265	3.58696e-192	4	TOPBP1
2.65761e-196	0.861702	0.959	0.617	9.36011e-192	4	FLNA
1.0225e-195	0.60931	0.499	0.133	3.60126e-191	4	E2F3
1.10428e-195	0.815533	0.918	0.473	3.88929e-191	4	AP1S2
1.45665e-195	0.456259	0.431	0.101	5.13032e-191	4	LMF2
1.61131e-195	0.344388	0.302	0.053	5.67502e-191	4	PDLIM7
3.02996e-195	0.807784	0.931	0.584	1.06715e-190	4	COX6B1
6.63472e-194	0.532591	0.382	0.084	2.33675e-189	4	SETBP1
7.1997e-194	0.511153	0.308	0.057	2.53573e-189	4	THY1
9.84386e-194	0.591452	0.614	0.19	3.46701e-189	4	PMVK
1.38202e-193	0.307482	0.258	0.04	4.86746e-189	4	GK
1.51672e-193	0.833003	0.954	0.502	5.34189e-189	4	AHNAK
2.71714e-193	0.491047	0.312	0.058	9.56976e-189	4	WDR63
2.73619e-193	0.80047	0.994	0.789	9.63687e-189	4	PPP1R12A
2.79484e-193	0.591456	0.674	0.216	9.84342e-189	4	SLAMF6
4.79942e-193	0.44592	0.29	0.051	1.69036e-188	4	ADAM12
4.62138e-191	0.780904	0.829	0.36	1.62765e-186	4	POLE4
5.00769e-191	0.421258	0.328	0.064	1.76371e-186	4	GADD45A
7.13035e-191	0.833721	0.967	0.721	2.51131e-186	4	NDUFB1
3.23863e-190	0.374157	0.262	0.043	1.14064e-185	4	CCDC34
4.0145e-190	0.44675	1	0.998	1.41391e-185	4	B2M
9.97124e-190	0.473661	0.454	0.112	3.51187e-185	4	MIS18A
5.27728e-189	0.831433	0.936	0.56	1.85866e-184	4	TPI1
9.12108e-189	0.465627	0.429	0.103	3.21244e-184	4	LOC107000617
4.3741e-188	0.567097	0.532	0.151	1.54056e-183	4	TXNRD1
5.9638e-188	0.522163	0.608	0.191	2.10045e-183	4	SERPINB1
7.20648e-188	0.587828	0.526	0.15	2.53812e-183	4	INTS7
1.37566e-187	0.766718	0.749	0.301	4.84507e-183	4	CENPK
1.91086e-186	0.276488	0.251	0.039	6.73005e-182	4	NENF
3.056e-186	0.617916	0.554	0.166	1.07632e-181	4	SMC6
5.35976e-186	0.773123	0.948	0.598	1.88771e-181	4	LOC696956
1.15632e-183	0.773366	0.898	0.492	4.07258e-179	4	DBI
8.62509e-183	0.827942	0.839	0.372	3.03776e-178	4	LOC720132
5.0273e-182	0.846478	0.716	0.28	1.77062e-177	4	SYNE2
1.86594e-181	0.779793	0.946	0.636	6.57183e-177	4	RAN
2.17621e-181	0.581182	0.614	0.2	7.66462e-177	4	FIBP
2.49618e-181	0.893318	0.779	0.365	8.79154e-177	4	CALM3
3.02748e-181	0.778033	0.949	0.637	1.06628e-176	4	LOC707227
1.19608e-180	0.645824	0.688	0.237	4.21259e-176	4	KAT2B
1.96467e-180	0.766086	0.995	0.834	6.91957e-176	4	TGFB1
2.02363e-180	0.38686	0.251	0.041	7.12722e-176	4	CPNE4
2.87475e-179	0.78987	0.81	0.384	1.01249e-174	4	RNASEH2C
1.27332e-178	0.500473	0.5	0.138	4.48465e-174	4	LMO4
1.27598e-178	0.293376	0.288	0.052	4.49399e-174	4	YEATS4
1.39925e-178	0.368772	0.32	0.064	4.92817e-174	4	SQLE
1.75933e-178	0.769351	0.675	0.256	6.19634e-174	4	ANP32E
3.68532e-178	0.731357	0.929	0.577	1.29797e-173	4	PSMA2
3.01296e-177	0.588731	0.617	0.203	1.06117e-172	4	CBX5
3.44153e-177	0.332036	0.294	0.055	1.21211e-172	4	YPEL1
1.4097e-176	0.513409	0.51	0.143	4.96496e-172	4	SH2D2A
2.20333e-176	0.38734	0.344	0.074	7.76014e-172	4	FABP5
3.72164e-176	0.389177	0.357	0.079	1.31076e-171	4	CCP110
4.20707e-176	0.65078	0.647	0.23	1.48173e-171	4	HEBP2
4.9209e-176	0.483005	0.458	0.12	1.73314e-171	4	SH3BP5
1.02035e-175	0.714597	0.827	0.387	3.59368e-171	4	NDUFB6
1.22657e-175	0.696742	0.976	0.815	4.32e-171	4	MYL12B
2.78787e-175	0.779275	0.901	0.532	9.81887e-171	4	NDUFB11
1.09075e-174	0.766651	0.898	0.472	3.84163e-170	4	CLEC2B
1.26245e-174	0.733336	0.801	0.361	4.44635e-170	4	CDK2AP2
1.29989e-173	0.391108	0.322	0.066	4.5782e-169	4	MTBP
2.58617e-173	0.810324	0.976	0.752	9.1085e-169	4	SET
2.97052e-173	0.806754	0.737	0.294	1.04622e-168	4	CEP128
3.82169e-173	0.405369	0.374	0.085	1.346e-168	4	GAB3
3.94394e-173	0.411906	0.392	0.093	1.38906e-168	4	EIF4EBP1
8.87079e-173	0.768515	0.77	0.346	3.12429e-168	4	SUPT16H
1.49007e-172	0.64736	0.99	0.865	5.24804e-168	4	ARPC3
5.47517e-172	0.520243	0.568	0.174	1.92836e-167	4	CMAS
4.1051e-171	0.822655	0.639	0.249	1.44582e-166	4	HMGN2
8.79953e-171	0.82877	0.888	0.515	3.09919e-166	4	YWHAQ
1.07944e-170	0.337537	0.311	0.063	3.80179e-166	4	MGST2
1.42661e-170	0.332606	0.288	0.055	5.02454e-166	4	GGH
4.22205e-170	0.750213	0.895	0.492	1.487e-165	4	PSME2
5.87241e-170	0.661573	0.987	0.881	2.06826e-165	4	ATP5MG
7.12188e-170	0.761612	0.865	0.421	2.50833e-165	4	ATP2B1
1.03969e-168	0.344093	0.313	0.064	3.66178e-164	4	BTG3
4.42773e-168	0.677609	0.991	0.862	1.55945e-163	4	RAC2
1.18231e-167	0.798874	0.944	0.674	4.1641e-163	4	HNRNPA3
3.51874e-167	0.492465	0.543	0.164	1.2393e-162	4	HPSE
3.99488e-167	0.752341	0.94	0.66	1.407e-162	4	COX7B
1.16393e-166	0.567701	0.996	0.948	4.09938e-162	4	OAZ1
1.99474e-166	0.651867	0.699	0.269	7.02546e-162	4	HPRT1
2.15271e-166	0.734552	0.877	0.494	7.58185e-162	4	VDAC3
2.43091e-166	0.401127	0.39	0.094	8.56166e-162	4	MGME1
2.8501e-166	0.610745	0.994	0.963	1.00381e-161	4	UBC
3.64238e-166	0.800043	0.821	0.449	1.28285e-161	4	NASP
2.24671e-165	0.667917	0.985	0.831	7.91291e-161	4	PSMA7
5.02779e-165	0.601534	0.537	0.17	1.77079e-160	4	MIS18BP1
9.71824e-165	0.542828	0.636	0.218	3.42276e-160	4	EBP
1.72246e-164	0.721665	0.878	0.435	6.0665e-160	4	ITGAL
1.74063e-164	0.643811	0.674	0.253	6.13049e-160	4	C5H4orf27
6.06129e-164	0.716881	0.957	0.685	2.13479e-159	4	NDUFA3
6.58087e-164	0.742065	0.944	0.642	2.31778e-159	4	NDUFB2
1.05519e-163	0.637401	0.719	0.284	3.71637e-159	4	ACTB
2.29564e-163	1.04955	0.862	0.497	8.08525e-159	4	RPS27L
4.25553e-163	0.678193	0.983	0.815	1.4988e-158	4	UBL5
1.21514e-162	0.47073	0.491	0.143	4.27974e-158	4	SSRP1
2.39442e-162	0.686004	0.969	0.726	8.43316e-158	4	ELOB
4.72048e-162	0.719493	0.936	0.657	1.66255e-157	4	GNG5
5.09764e-162	0.514218	0.573	0.183	1.79539e-157	4	DCXR
8.15607e-162	0.661273	0.737	0.303	2.87257e-157	4	RBBP7
1.02683e-161	0.658669	0.989	0.902	3.61648e-157	4	ARPC1B
1.15029e-161	0.729003	0.666	0.249	4.05131e-157	4	GTDC1
5.10401e-161	0.42734	0.405	0.103	1.79763e-156	4	SAMD1
1.61509e-160	0.367717	0.35	0.081	5.68836e-156	4	COMTD1
2.84119e-160	0.584774	0.461	0.132	1.00067e-155	4	FAM102B
4.38394e-160	0.660134	0.751	0.31	1.54402e-155	4	SRM
7.77845e-160	0.622263	0.985	0.885	2.73957e-155	4	ATP5MPL
9.12138e-160	0.670103	0.807	0.371	3.21255e-155	4	ARPC5L
2.48277e-159	0.660695	0.757	0.321	8.74431e-155	4	LOC696959
7.76207e-158	0.65316	0.742	0.314	2.7338e-153	4	RNF167
1.44433e-157	0.777889	0.744	0.331	5.08694e-153	4	TUBA1A
2.57505e-157	0.611966	0.695	0.267	9.06931e-153	4	LOC100427190
3.31244e-156	0.565638	0.563	0.191	1.16664e-151	4	FAM111A
8.8633e-156	0.516096	0.567	0.186	3.12165e-151	4	POLE3
1.59936e-154	0.535333	0.591	0.201	5.63293e-150	4	LOC701053
1.95638e-154	0.461515	0.326	0.075	6.89038e-150	4	SKAP2
2.4993e-154	0.884802	0.801	0.392	8.80252e-150	4	RAPGEF2
4.76381e-154	0.650753	0.698	0.271	1.67781e-149	4	ARHGAP26
1.4305e-153	0.447341	0.472	0.137	5.03822e-149	4	NBEAL2
1.63309e-153	0.497333	0.998	0.977	5.75173e-149	4	ATP5F1E
1.68656e-153	0.360728	0.35	0.083	5.94005e-149	4	SYT11
2.91758e-153	0.323596	0.306	0.066	1.02757e-148	4	LOC699195
3.29312e-153	0.290563	0.265	0.051	1.15984e-148	4	TOX2
3.77874e-153	0.518725	0.53	0.169	1.33087e-148	4	RASGEF1A
9.55892e-153	0.538606	0.634	0.225	3.36665e-148	4	HTATSF1
2.41775e-152	0.698696	0.423	0.121	8.51531e-148	4	STK3
3.32854e-152	0.340863	0.305	0.066	1.17231e-147	4	ISG15
4.01586e-152	0.324579	0.252	0.047	1.41439e-147	4	CTSW
9.26993e-152	0.657615	0.888	0.495	3.26487e-147	4	NDUFB7
5.04019e-151	0.677848	0.713	0.283	1.77515e-146	4	MT2A
3.72462e-150	0.655317	0.992	0.866	1.31181e-145	4	IFI27L2
8.23325e-150	0.541971	0.501	0.158	2.89975e-145	4	TRIM37
8.49044e-150	0.389032	0.402	0.106	2.99033e-145	4	ZBP1
1.72832e-149	0.531405	0.621	0.223	6.08716e-145	4	ITGB1BP1
1.00423e-148	0.661051	0.735	0.323	3.5369e-144	4	ANAPC11
4.56932e-148	0.60927	0.796	0.366	1.60931e-143	4	LAGE3
5.45538e-148	0.661383	0.987	0.93	1.92138e-143	4	CORO1A
9.00338e-148	0.602675	0.733	0.308	3.17099e-143	4	SNRPF
1.6103e-147	0.779273	0.819	0.455	5.67146e-143	4	SMC3
6.5387e-147	0.499128	0.552	0.183	2.30293e-142	4	ADA
6.17706e-146	0.657946	0.727	0.316	2.17556e-141	4	TMEM154
6.40788e-146	0.493134	0.589	0.201	2.25686e-141	4	CAPN2
1.31629e-145	0.466623	0.408	0.113	4.63597e-141	4	PMAIP1
1.772e-145	0.644064	0.852	0.433	6.241e-141	4	SRI
3.72613e-145	0.772691	0.963	0.658	1.31234e-140	4	CLEC2D
5.86989e-145	0.324495	0.288	0.062	2.06737e-140	4	ENPP4
9.80799e-145	0.511604	0.479	0.151	3.45437e-140	4	ZDHHC12
1.1334e-144	0.677395	0.881	0.492	3.99183e-140	4	AP2M1
1.68366e-143	0.546925	0.612	0.224	5.92985e-139	4	EED
6.16073e-143	0.543538	0.681	0.269	2.16981e-138	4	PRELID1
1.69578e-142	0.684376	0.745	0.33	5.97253e-138	4	CEBPB
3.47853e-142	0.711245	0.963	0.616	1.22514e-137	4	CD44
1.01895e-141	0.813179	0.869	0.469	3.58874e-137	4	ID2
6.44948e-141	0.729844	0.973	0.71	2.27151e-136	4	LOC719702
8.05803e-141	0.724623	0.637	0.255	2.83804e-136	4	ZRANB3
7.27505e-140	0.395512	0.378	0.1	2.56227e-135	4	GAS7
8.01602e-140	0.304039	0.29	0.064	2.82324e-135	4	DDB2
2.51001e-139	0.56927	0.658	0.255	8.84026e-135	4	SNTB2
4.20466e-139	0.341271	0.368	0.094	1.48088e-134	4	STX10
1.08409e-138	0.57507	0.657	0.264	3.81816e-134	4	HINT2
1.3473e-138	0.358605	0.29	0.066	4.74518e-134	4	LOC722929
5.90246e-138	0.418108	0.44	0.13	2.07885e-133	4	ACYP1
6.12702e-138	0.652412	0.936	0.615	2.15794e-133	4	CAP1
7.0756e-138	0.54127	0.622	0.233	2.49202e-133	4	TMEM181
8.67658e-138	0.717167	0.625	0.248	3.05589e-133	4	PBX3
1.00169e-136	0.485439	0.543	0.185	3.52794e-132	4	MTMR12
2.97066e-136	0.38874	0.472	0.143	1.04626e-131	4	PXN
3.34901e-136	0.580514	0.675	0.275	1.17952e-131	4	POLR2I
3.38224e-136	0.570472	0.766	0.346	1.19123e-131	4	SNF8
3.57813e-136	0.284301	0.265	0.056	1.26022e-131	4	C5H4orf46
3.70027e-136	0.947714	0.42	0.136	1.30323e-131	4	LOC696872
4.69824e-136	0.700973	0.91	0.613	1.65472e-131	4	HMGN1
6.52913e-136	0.360791	0.413	0.117	2.29956e-131	4	UBE2A
1.71614e-135	0.441885	0.51	0.163	6.04426e-131	4	GDE1
3.44489e-135	0.440793	0.483	0.152	1.21329e-130	4	ZYX
3.54459e-135	0.504941	0.542	0.189	1.2484e-130	4	STARD7
4.58775e-135	0.595449	0.914	0.453	1.61581e-130	4	ATXN1
4.98433e-135	0.275849	0.267	0.056	1.75548e-130	4	SFR1
2.99173e-134	0.628981	0.784	0.368	1.05369e-129	4	MTPN
5.40104e-134	0.730879	0.97	0.805	1.90224e-129	4	ANP32B
5.61969e-134	0.759631	0.928	0.585	1.97926e-129	4	CEMIP2
7.49772e-134	0.672644	0.971	0.716	2.6407e-129	4	TAGLN2
9.49686e-133	0.551031	0.748	0.326	3.34479e-128	4	SNRNP25
2.11101e-132	0.64314	0.909	0.569	7.43499e-128	4	MGST3
5.17264e-132	0.645427	0.886	0.516	1.8218e-127	4	TMEM50A
5.63885e-132	0.500234	0.59	0.218	1.986e-127	4	DYNLL2
5.79518e-132	0.642881	0.878	0.504	2.04106e-127	4	ARHGDIA
7.05389e-132	0.31262	0.298	0.07	2.48438e-127	4	AGTRAP
1.53708e-131	0.642892	0.816	0.419	5.4136e-127	4	ARF6
2.26417e-130	0.724683	0.45	0.156	7.9744e-126	4	LOC114676051
7.38216e-130	0.593217	0.982	0.827	2.6e-125	4	YWHAB
1.0582e-129	0.80552	0.936	0.703	3.72698e-125	4	CALM2
1.15123e-129	0.649883	0.789	0.389	4.05463e-125	4	GNA13
1.16373e-129	0.413618	0.47	0.149	4.09865e-125	4	DNAJC21
1.18493e-129	0.29417	0.333	0.083	4.17333e-125	4	PRADC1
1.47926e-129	0.310649	0.315	0.077	5.20996e-125	4	FN3KRP
5.97848e-129	0.678142	0.708	0.327	2.10562e-124	4	CENPC
1.23138e-128	0.646931	0.901	0.592	4.33692e-124	4	BANF1
1.77826e-128	0.299883	0.265	0.059	6.26302e-124	4	NFIL3
1.35625e-127	0.364959	0.397	0.114	4.77671e-123	4	ACAP3
1.09549e-126	0.478554	0.555	0.2	3.85831e-122	4	MCMBP
1.30341e-126	0.431768	0.338	0.092	4.59059e-122	4	AURKB
2.04411e-126	0.942981	0.767	0.39	7.19934e-122	4	WWOX
2.30957e-126	0.563116	0.572	0.219	8.13429e-122	4	TIMP1
3.02943e-126	0.533587	0.717	0.311	1.06697e-121	4	SEC11C
3.78564e-126	0.471594	0.441	0.141	1.3333e-121	4	SKA2
8.74274e-126	0.584969	0.73	0.349	3.07919e-121	4	MPC2
4.10268e-125	0.673744	0.608	0.257	1.44496e-120	4	CEP192
4.28549e-125	0.326099	0.355	0.096	1.50935e-120	4	CLN6
9.77806e-125	0.442216	0.31	0.079	3.44383e-120	4	MEGF9
9.85245e-125	0.661298	0.79	0.415	3.47003e-120	4	PKM
1.06819e-124	0.544803	0.571	0.216	3.76215e-120	4	FNDC3B
1.19773e-124	0.413939	0.481	0.158	4.21839e-120	4	POM121C
1.27885e-124	0.473259	0.543	0.193	4.50412e-120	4	ADCY9
3.1044e-124	0.527254	0.658	0.269	1.09337e-119	4	NAA38
6.88007e-124	0.276819	0.285	0.067	2.42316e-119	4	DONSON
7.97277e-124	0.374484	0.433	0.133	2.80801e-119	4	TPRKB
4.72236e-123	0.425616	0.505	0.173	1.66322e-118	4	SPTSSA
9.44225e-123	0.50889	0.656	0.27	3.32556e-118	4	CLTB
1.01851e-122	0.44423	0.435	0.138	3.58718e-118	4	MT1M
1.13438e-122	0.642202	0.992	0.919	3.99528e-118	4	RABGAP1L
1.32912e-122	0.552103	0.781	0.388	4.68115e-118	4	NDUFA12
1.89103e-122	0.621554	0.888	0.565	6.6602e-118	4	ATP5IF1
3.0762e-122	0.430245	0.514	0.179	1.08344e-117	4	LOC712324
3.14147e-122	0.633506	0.89	0.567	1.10643e-117	4	CBX3
3.2049e-122	0.652661	0.916	0.626	1.12877e-117	4	TMEM258
3.25503e-122	0.649317	0.873	0.538	1.14642e-117	4	ERH
5.32147e-122	0.78453	0.754	0.412	1.87422e-117	4	TMPO
5.63075e-122	0.606813	0.941	0.661	1.98315e-117	4	RBX1
5.78492e-122	0.591018	0.761	0.361	2.03745e-117	4	PSMD14
7.83818e-122	0.648808	0.994	0.867	2.76061e-117	4	SH3KBP1
1.31211e-121	0.605717	0.965	0.765	4.62126e-117	4	IFI16
1.98949e-121	0.684369	0.94	0.645	7.00699e-117	4	SYNE1
3.27084e-121	0.601203	0.891	0.539	1.15199e-116	4	PPP1CA
4.34626e-121	0.47033	0.54	0.197	1.53075e-116	4	TRIOBP
5.11351e-121	0.474788	0.619	0.242	1.80098e-116	4	ACP1
5.1474e-121	0.308167	0.348	0.094	1.81292e-116	4	RHNO1
9.72977e-121	0.567804	0.796	0.397	3.42683e-116	4	SLC25A4
1.21296e-120	0.315088	0.32	0.083	4.27206e-116	4	LOC107000655
1.66082e-120	0.638022	0.891	0.594	5.84941e-116	4	HNRNPR
1.92076e-120	0.600659	0.634	0.266	6.7649e-116	4	ALMS1
3.10658e-120	0.409423	0.487	0.165	1.09414e-115	4	TRNAU1AP
4.26557e-120	0.714282	0.973	0.849	1.50233e-115	4	CBLB
1.30207e-119	0.445683	0.546	0.198	4.5859e-115	4	PRR5
3.73188e-119	0.591806	0.965	0.788	1.31437e-114	4	HNRNPF
6.39711e-119	0.394953	0.419	0.131	2.25306e-114	4	CTPS1
9.61187e-119	0.406757	0.444	0.143	3.3853e-114	4	ATP13A3
9.84141e-119	0.591286	0.724	0.338	3.46614e-114	4	RBL1
1.32531e-118	0.50404	0.665	0.277	4.66775e-114	4	TRAPPC1
2.08916e-118	0.59081	0.852	0.492	7.35802e-114	4	TALDO1
9.87869e-118	0.317628	0.365	0.104	3.47928e-113	4	SLX1A
1.20865e-117	0.623159	0.964	0.719	4.25688e-113	4	MSN
1.32202e-117	0.31355	0.322	0.086	4.65617e-113	4	TMEM106A
1.65375e-117	0.354648	0.433	0.135	5.82451e-113	4	SLC39A1
2.59198e-117	0.654786	0.794	0.395	9.12896e-113	4	GLCCI1
2.67136e-117	0.592063	0.692	0.314	9.40852e-113	4	USP37
3.19154e-117	0.370309	0.417	0.129	1.12406e-112	4	COPRS
5.54316e-117	1.15943	0.759	0.432	1.9523e-112	4	MAMU-A
6.87387e-117	0.272791	0.265	0.062	2.42098e-112	4	PASK
7.6398e-117	0.622736	0.914	0.552	2.69074e-112	4	LOC719250
1.72544e-116	0.647235	0.995	0.949	6.07699e-112	4	ACTG1
1.91558e-116	0.624407	0.909	0.626	6.74668e-112	4	SLC25A5
2.38037e-116	0.331628	0.376	0.109	8.38366e-112	4	PAXIP1
3.47413e-116	0.627929	0.862	0.481	1.22359e-111	4	NUCB2
4.06199e-116	0.505554	0.694	0.297	1.43063e-111	4	ZBTB38
7.55265e-116	0.416967	0.506	0.178	2.66004e-111	4	MT1E
9.53628e-116	0.407475	0.473	0.161	3.35868e-111	4	CD151
1.00319e-115	0.770445	0.823	0.464	3.53323e-111	4	MAPRE2
2.8844e-115	0.430042	0.563	0.207	1.01589e-110	4	SSNA1
3.2119e-115	0.755979	0.927	0.665	1.13123e-110	4	LOC106996627
4.75449e-115	0.539825	0.776	0.383	1.67453e-110	4	ATP5MC1
6.45166e-115	0.363644	0.423	0.133	2.27228e-110	4	NAGK
1.55966e-114	0.593699	0.65	0.286	5.49312e-110	4	B3GLCT
2.15529e-114	0.471226	0.65	0.265	7.59092e-110	4	VDAC1
3.02864e-114	0.587991	0.779	0.387	1.06669e-109	4	FOXN2
8.53159e-114	0.554526	0.728	0.341	3.00482e-109	4	RABL6
1.18636e-113	0.332988	0.382	0.113	4.17838e-109	4	GUSBA
8.49989e-113	0.47591	0.569	0.22	2.99366e-108	4	DERA
1.03325e-112	0.40454	0.505	0.18	3.6391e-108	4	POLR3K
1.0808e-112	0.323524	0.371	0.11	3.80656e-108	4	RRP7A
1.1026e-112	0.670856	0.905	0.667	3.88334e-108	4	NUCKS1
2.03755e-112	0.394885	0.539	0.196	7.17624e-108	4	PSMC3
3.46164e-112	0.253593	0.278	0.068	1.21919e-107	4	ZNF672
4.62481e-112	0.558143	0.94	0.689	1.62886e-107	4	ATP5MF
5.50129e-112	0.650579	0.917	0.655	1.93755e-107	4	SRSF10
6.93341e-112	0.535552	0.766	0.373	2.44195e-107	4	RPN2
1.25846e-111	0.563769	0.914	0.608	4.43231e-107	4	NDUFB4
1.33413e-111	0.579123	0.781	0.416	4.69879e-107	4	GNB2
1.35064e-111	0.513603	0.695	0.309	4.75694e-107	4	GMPS
2.76553e-111	0.510149	0.739	0.349	9.74019e-107	4	AP2S1
6.36312e-111	0.529156	0.718	0.335	2.24109e-106	4	SPCS3
9.73515e-111	0.588323	0.989	0.785	3.42872e-106	4	IQGAP2
4.26343e-110	0.346271	0.417	0.133	1.50158e-105	4	MSH2
8.75615e-110	0.38769	0.447	0.15	3.08392e-105	4	SCCPDH
9.04508e-110	0.569526	0.902	0.546	3.18568e-105	4	PREX1
1.0371e-109	0.537155	0.819	0.437	3.65266e-105	4	MRPL41
1.79055e-109	0.575933	0.954	0.735	6.30633e-105	4	ATP5ME
4.32214e-109	0.548213	0.929	0.626	1.52226e-104	4	NEDD8
5.27737e-109	0.518755	0.632	0.273	1.85869e-104	4	RAD50
6.10753e-109	0.422618	0.513	0.189	2.15107e-104	4	LPGAT1
3.51148e-108	0.518887	0.97	0.773	1.23674e-103	4	RHOA
9.92295e-108	0.599302	0.929	0.609	3.49486e-103	4	RORA
1.02806e-107	0.330642	0.314	0.087	3.62083e-103	4	USP18
1.87198e-107	0.452131	0.564	0.222	6.59313e-103	4	PFKP
3.21352e-107	0.390472	0.451	0.156	1.1318e-102	4	CHRAC1
3.43329e-107	0.680082	0.942	0.666	1.20921e-102	4	BABAM2
3.52167e-107	0.470544	0.458	0.163	1.24033e-102	4	HIVEP3
1.86933e-106	0.393672	0.496	0.179	6.58378e-102	4	NELFE
5.53531e-106	0.352773	0.447	0.153	1.94953e-101	4	LPXN
6.55164e-106	0.573659	0.874	0.587	2.30749e-101	4	SNRPD3
7.0686e-106	0.405382	0.997	0.989	2.48956e-101	4	TMSB10
8.83798e-106	0.452237	0.613	0.254	3.11274e-101	4	PSMB2
1.05054e-105	0.383888	0.495	0.18	3.70002e-101	4	AHSA2P
1.18254e-105	0.437867	0.527	0.201	4.1649e-101	4	KIF13B
1.19327e-105	0.600779	0.862	0.532	4.2027e-101	4	LOC699443
1.69555e-105	0.457637	0.522	0.199	5.97174e-101	4	STX4
2.1679e-105	0.269241	0.298	0.08	7.63536e-101	4	SDHD
3.4695e-105	0.308773	0.28	0.074	1.22196e-100	4	KATNAL1
4.03015e-105	0.516815	0.752	0.375	1.41942e-100	4	P4HB
4.82686e-105	0.550973	0.906	0.62	1.70002e-100	4	MZT2B
5.85554e-105	0.343896	0.38	0.12	2.06232e-100	4	CTSC
7.22139e-105	0.646599	0.998	0.958	2.54337e-100	4	KEG06-p08
9.69509e-105	0.429057	0.527	0.203	3.41461e-100	4	AKR7A2
1.21767e-104	0.544602	0.756	0.386	4.28863e-100	4	DCTN3
1.25251e-104	0.569685	0.917	0.562	4.41135e-100	4	ATP2B4
1.42799e-104	0.515605	0.515	0.201	5.02939e-100	4	SERPINA1
3.58959e-104	0.620301	0.334	0.104	1.26425e-99	4	TNFRSF18
5.63826e-104	0.827663	0.977	0.69	1.98579e-99	4	LOC114669738
9.30766e-104	0.534776	0.666	0.308	3.27816e-99	4	SMC1A
1.87152e-103	0.561999	0.955	0.697	6.59149e-99	4	DIAPH1
5.76429e-103	0.540252	0.846	0.483	2.03018e-98	4	PSMA5
6.21833e-103	0.42001	0.404	0.136	2.1901e-98	4	CCDC88A
2.02326e-102	0.330112	0.433	0.145	7.12593e-98	4	UBAC1
2.93792e-102	0.405579	0.491	0.183	1.03473e-97	4	SAE1
4.50963e-102	0.395379	0.483	0.176	1.58829e-97	4	MFSD14B
4.52383e-102	0.621722	0.864	0.509	1.59329e-97	4	STK39
5.5143e-102	0.639328	0.314	0.094	1.94214e-97	4	IL12RB2
6.20551e-102	0.441897	0.553	0.221	2.18558e-97	4	ACAT2
1.55196e-101	0.405653	0.592	0.239	5.46599e-97	4	LAP3
1.77829e-101	0.611417	0.744	0.404	6.26312e-97	4	SUZ12
1.8113e-101	0.528924	0.846	0.498	6.37939e-97	4	NUDC
4.94865e-101	0.48383	0.683	0.308	1.74292e-96	4	ARRB2
5.39661e-101	0.783756	0.41	0.154	1.90069e-96	4	LOC696005
5.79322e-101	0.550949	0.89	0.575	2.04037e-96	4	LOC717879
1.07245e-100	0.525819	0.805	0.443	3.77717e-96	4	NDUFC2
1.20561e-100	0.528343	0.754	0.366	4.24614e-96	4	C6H5orf56
1.44389e-100	0.322762	0.39	0.126	5.08537e-96	4	KEAP1
2.03145e-100	0.368616	0.463	0.167	7.15478e-96	4	FAM50A
2.7573e-100	0.482858	0.694	0.321	9.7112e-96	4	CTSA
4.30104e-100	0.270396	0.287	0.078	1.51483e-95	4	BLM
6.45071e-100	0.526911	0.801	0.434	2.27194e-95	4	BSG
6.50196e-100	0.532265	0.909	0.653	2.28999e-95	4	UQCRQ
1.11281e-99	0.27235	0.259	0.067	3.91933e-95	4	LOC114680366
1.14032e-99	0.34439	0.464	0.165	4.01621e-95	4	MCRIP1
1.3254e-99	0.321763	0.364	0.114	4.66805e-95	4	PTS
1.38217e-99	0.559879	0.805	0.431	4.86801e-95	4	FAR1
1.58905e-99	0.467213	0.684	0.315	5.59664e-95	4	PIN1
1.92067e-99	0.519253	0.825	0.46	6.76459e-95	4	COMT
5.72445e-99	0.481097	0.751	0.371	2.01615e-94	4	BCL7C
2.13598e-98	0.479028	0.703	0.324	7.52293e-94	4	RNPEPL1
2.24231e-98	0.396632	0.612	0.253	7.89742e-94	4	BUD31
6.08972e-98	0.343868	0.352	0.111	2.1448e-93	4	SPOPL
9.28051e-98	0.528989	0.833	0.447	3.2686e-93	4	TOMM6
1.04424e-97	0.454331	0.672	0.303	3.67782e-93	4	CCDC12
1.74974e-97	0.289057	0.317	0.093	6.1626e-93	4	PARP2
3.84643e-97	0.483123	0.748	0.376	1.35471e-92	4	PSMD13
4.13254e-97	0.33906	0.461	0.165	1.45548e-92	4	CDC34
4.20206e-97	0.338519	0.356	0.113	1.47997e-92	4	LIN9
5.29926e-97	0.410665	0.503	0.197	1.8664e-92	4	HMGXB4
6.18187e-97	0.427498	0.551	0.224	2.17726e-92	4	RPA1
9.41963e-97	0.274868	0.321	0.094	3.31759e-92	4	IDI1
1.29335e-96	0.70427	0.934	0.708	4.55519e-92	4	FAF1
2.30984e-96	0.526837	0.947	0.692	8.13526e-92	4	PET100
2.50692e-96	0.382661	0.416	0.146	8.82939e-92	4	POLH
4.39877e-96	0.682894	0.63	0.307	1.54925e-91	4	ARL6IP1
1.13811e-95	0.474573	0.774	0.402	4.00842e-91	4	NDUFS6
1.32449e-95	0.427311	0.581	0.244	4.66486e-91	4	PFKL
4.44088e-95	0.373215	0.443	0.161	1.56408e-90	4	MSH6
6.82467e-95	0.500427	0.77	0.398	2.40365e-90	4	SLC9A3R1
1.35441e-94	0.280711	0.377	0.122	4.77024e-90	4	DCPS
1.65391e-94	0.320592	0.381	0.127	5.82507e-90	4	PRDX4
2.54437e-94	0.596144	0.951	0.652	8.96128e-90	4	LRRC8C
5.4844e-94	0.296779	0.36	0.115	1.93161e-89	4	NSUN5
6.12852e-94	0.324865	0.433	0.151	2.15847e-89	4	PCYT2
8.53973e-94	0.455971	0.989	0.941	3.00769e-89	4	HNRNPA2B1
1.18348e-93	0.517818	0.826	0.476	4.16823e-89	4	ATP5MC3
3.92821e-93	0.470438	0.658	0.309	1.38352e-88	4	CNIH4
4.06913e-93	0.54982	0.913	0.643	1.43315e-88	4	SRSF2
4.44763e-93	0.420104	0.607	0.26	1.56646e-88	4	SLF1
5.33206e-93	0.518754	0.735	0.383	1.87795e-88	4	ETFB
1.7588e-92	0.429895	0.56	0.236	6.19449e-88	4	RPA2
1.81037e-92	0.586607	0.809	0.48	6.37611e-88	4	CD63
6.41418e-92	0.474478	0.925	0.665	2.25907e-87	4	PSMB1
7.28993e-92	0.419898	0.491	0.193	2.56751e-87	4	RNF144A
1.70287e-91	0.501387	0.725	0.373	5.99752e-87	4	RFC1
1.93392e-91	0.338899	0.418	0.148	6.81127e-87	4	UCHL5
2.39185e-91	0.46873	0.687	0.328	8.4241e-87	4	GNAQ
2.4837e-91	0.28054	0.319	0.097	8.74759e-87	4	STARD3NL
2.82468e-91	0.42535	0.494	0.193	9.94852e-87	4	LIN52
4.33102e-91	0.44147	0.671	0.312	1.52539e-86	4	ARL6IP6
4.69702e-91	1.2907	0.471	0.209	1.65429e-86	4	HIST2H2AC
5.73623e-91	0.488839	0.974	0.831	2.0203e-86	4	SEPTIN7
6.44091e-91	0.347606	0.362	0.122	2.26849e-86	4	MPHOSPH9
7.43122e-91	0.497125	0.924	0.642	2.61727e-86	4	BLOC1S1
9.44615e-91	0.41551	0.645	0.294	3.32693e-86	4	C10H20orf24
1.06742e-90	0.311507	0.4	0.138	3.75946e-86	4	SNRPA
1.406e-90	0.501998	0.784	0.434	4.95194e-86	4	CSTB
1.76731e-90	0.781027	0.316	0.108	6.22446e-86	4	LOC704341
2.40982e-90	0.304064	0.404	0.14	8.48737e-86	4	RAD51C
4.64906e-90	0.540917	0.756	0.397	1.6374e-85	4	RPS6KA5
6.03618e-90	0.407473	0.568	0.239	2.12594e-85	4	PAXX
6.61651e-90	0.480654	0.742	0.381	2.33033e-85	4	NDUFS8
1.02331e-89	0.29065	0.353	0.115	3.6041e-85	4	RNF168
1.17141e-89	0.558297	0.871	0.532	4.1257e-85	4	FBXW7
1.37763e-89	0.430244	0.541	0.228	4.85202e-85	4	TUBGCP3
1.42656e-89	0.276971	0.359	0.116	5.02433e-85	4	NUP93
1.75238e-89	0.491728	0.758	0.405	6.17187e-85	4	DRAP1
2.12081e-89	0.343857	0.491	0.19	7.46949e-85	4	LOC694064
3.28103e-89	0.290203	0.326	0.102	1.15558e-84	4	RDX
3.86461e-89	0.493602	0.99	0.937	1.36112e-84	4	HSPA8
1.2412e-88	0.418708	0.554	0.233	4.3715e-84	4	ADIPOR2
1.29721e-88	0.437621	0.637	0.293	4.56878e-84	4	ATL3
1.55059e-88	0.423438	0.603	0.272	5.46119e-84	4	CMC2
1.91399e-88	0.492168	0.795	0.429	6.74107e-84	4	ATOX1
2.03069e-88	0.426521	0.636	0.29	7.15207e-84	4	CIAO2A
2.44063e-88	0.55134	0.934	0.652	8.5959e-84	4	KLF3
3.02684e-88	0.463971	0.992	0.892	1.06605e-83	4	PRKCH
3.25362e-88	0.413629	0.66	0.3	1.14593e-83	4	ADRM1
3.67428e-88	0.433193	0.734	0.358	1.29408e-83	4	DSTN
3.99903e-88	0.489064	0.948	0.706	1.40846e-83	4	ARPC5
4.48442e-88	0.448252	0.978	0.863	1.57941e-83	4	ATP5F1D
5.79703e-88	0.379198	0.546	0.227	2.04171e-83	4	ASB8
8.63676e-88	0.330695	0.442	0.164	3.04187e-83	4	PCNT
1.58769e-87	0.364025	0.501	0.199	5.59183e-83	4	SNX5
1.70492e-87	0.517813	0.82	0.475	6.00474e-83	4	TMEM160
1.7927e-87	0.530147	0.934	0.713	6.31389e-83	4	SRSF3
1.95401e-87	0.527703	0.866	0.569	6.88202e-83	4	SNRPD2
2.33138e-87	0.428716	0.635	0.291	8.21111e-83	4	NAA10
2.72746e-87	0.480955	0.721	0.367	9.60612e-83	4	TMEM230
4.94181e-87	0.443924	0.749	0.385	1.7405e-82	4	PSMB3
5.98297e-87	0.363893	0.384	0.136	2.1072e-82	4	ORC3
1.15824e-86	0.457674	0.679	0.33	4.07932e-82	4	IQGAP1
1.56697e-86	0.316444	0.431	0.157	5.51888e-82	4	LNPK
3.85855e-86	0.482412	0.84	0.485	1.35898e-81	4	PARK7
3.87355e-86	0.475026	0.821	0.473	1.36427e-81	4	ATP6V1F
5.51176e-86	0.323272	0.469	0.178	1.94124e-81	4	TPST2
7.85357e-86	0.509455	0.943	0.705	2.76603e-81	4	ROMO1
9.67059e-86	0.481579	0.841	0.507	3.40598e-81	4	DDOST
1.3171e-85	0.518842	0.889	0.622	4.63884e-81	4	XRCC5
3.9852e-85	0.482874	0.869	0.537	1.40359e-80	4	COPE
4.56648e-85	0.640506	0.751	0.414	1.60831e-80	4	AHI1
4.93874e-85	0.310274	0.422	0.153	1.73943e-80	4	TPGS2
7.2249e-85	0.256294	0.303	0.094	2.54461e-80	4	ZFYVE21
1.26097e-84	0.464022	0.773	0.399	4.44114e-80	4	CD2
1.30034e-84	0.358581	0.526	0.218	4.5798e-80	4	ANKRD39
1.59916e-84	0.491737	0.848	0.495	5.63222e-80	4	SELENOT
1.69863e-84	0.421922	0.568	0.25	5.98259e-80	4	BOLA2B
4.21162e-84	0.348388	0.472	0.183	1.48333e-79	4	CENPB
4.5531e-84	0.417242	0.652	0.302	1.6036e-79	4	TENT5C
4.64969e-84	0.411946	0.607	0.275	1.63762e-79	4	ARPP19
4.98683e-84	0.297202	0.327	0.107	1.75636e-79	4	GGT1
5.30165e-84	0.306128	0.373	0.13	1.86724e-79	4	UBR7
8.71937e-84	0.42814	0.639	0.301	3.07096e-79	4	RAB11A
1.05898e-83	0.488873	0.851	0.523	3.72973e-79	4	FKBP1A
1.17682e-83	0.532181	0.923	0.613	4.14476e-79	4	EPS15
1.9496e-83	0.4424	0.666	0.317	6.8665e-79	4	OXSR1
2.26872e-83	0.284127	0.334	0.11	7.99044e-79	4	CDCA4
3.92093e-83	0.318499	0.383	0.137	1.38095e-78	4	RBM15
1.24465e-82	0.490157	0.883	0.559	4.38366e-78	4	RNF149
2.1189e-82	0.464875	0.518	0.225	7.46277e-78	4	AGPAT4
2.62689e-82	0.262224	0.349	0.116	9.25192e-78	4	THOC6
3.58464e-82	0.37533	0.556	0.237	1.26251e-77	4	PAGR1
3.76054e-82	0.441405	0.762	0.406	1.32446e-77	4	UQCRC1
3.87119e-82	0.547829	0.82	0.511	1.36343e-77	4	H2AFY
4.49525e-82	0.439478	0.681	0.332	1.58323e-77	4	CAPNS1
4.59623e-82	0.323236	0.388	0.14	1.61879e-77	4	MZT1
5.69671e-82	0.638931	0.767	0.448	2.00638e-77	4	TFDP2
6.60996e-82	0.318175	0.449	0.172	2.32803e-77	4	TMEM14A
7.02486e-82	0.398415	0.612	0.276	2.47416e-77	4	ATP1A1
7.82828e-82	0.259318	0.335	0.11	2.75712e-77	4	MAGOHB
1.34524e-81	0.556245	0.76	0.427	4.73795e-77	4	RB1
1.41594e-81	0.470292	0.765	0.42	4.98693e-77	4	LAMP1
1.45812e-81	0.407543	0.595	0.271	5.13551e-77	4	PSMD1
2.15897e-81	0.406975	0.649	0.31	7.60389e-77	4	AKR1A1
2.26335e-81	0.398453	0.63	0.288	7.97153e-77	4	MRPL13
2.34838e-81	0.603865	0.8	0.505	8.27099e-77	4	RHEB
2.52255e-81	0.417982	0.545	0.239	8.88442e-77	4	LCLAT1
2.72043e-81	0.515651	0.796	0.465	9.58137e-77	4	RTN3
3.15501e-81	0.385501	0.594	0.267	1.1112e-76	4	PHB
5.2544e-81	0.369133	0.564	0.245	1.8506e-76	4	C16H17orf49
7.2614e-81	0.536322	0.747	0.423	2.55746e-76	4	LOC114678430
7.43645e-81	0.540976	0.943	0.699	2.61912e-76	4	NR3C1
7.55892e-81	0.466238	0.713	0.36	2.66225e-76	4	PDAP1
8.81261e-81	0.309623	0.418	0.155	3.1038e-76	4	LOC114672186
8.99869e-81	0.378927	0.537	0.229	3.16934e-76	4	RTTN
1.41701e-80	0.450488	0.844	0.509	4.99072e-76	4	NDUFB10
1.58118e-80	0.445077	0.606	0.281	5.56893e-76	4	UBAP2
1.59201e-80	0.357478	0.51	0.208	5.60707e-76	4	D2HGDH
1.61668e-80	0.390601	0.598	0.275	5.69395e-76	4	GTF3C6
2.04277e-80	0.38014	0.608	0.274	7.19463e-76	4	DIABLO
2.59556e-80	0.45537	0.773	0.429	9.14155e-76	4	PSMD8
3.27582e-80	0.441688	0.753	0.395	1.15374e-75	4	ENY2
3.50796e-80	0.477575	0.954	0.791	1.2355e-75	4	NDUFA4
3.53462e-80	0.255313	0.317	0.103	1.24489e-75	4	LRRC8A
3.7218e-80	0.338948	0.536	0.222	1.31082e-75	4	PLEKHG3
3.91919e-80	0.390136	0.485	0.2	1.38034e-75	4	PLEKHA5
5.45456e-80	0.447048	0.875	0.585	1.9211e-75	4	ARF1
6.36747e-80	0.487718	0.959	0.776	2.24262e-75	4	GSTP1
9.88505e-80	0.640181	0.892	0.59	3.48151e-75	4	PRKCA
1.75618e-79	0.485445	0.816	0.5	6.18528e-75	4	RALY
1.92057e-79	0.483622	0.428	0.177	6.76425e-75	4	UBE2S
3.31122e-79	0.421797	0.705	0.354	1.16621e-74	4	MADD
3.34527e-79	0.3262	0.444	0.173	1.1782e-74	4	HDAC3
6.82935e-79	0.49589	0.698	0.378	2.4053e-74	4	MAZ
1.33438e-78	0.447272	0.697	0.359	4.6997e-74	4	NUP210
1.61488e-78	0.287881	0.346	0.12	5.68762e-74	4	SLC6A6
1.62434e-78	0.409398	0.689	0.344	5.72093e-74	4	PTPMT1
1.86594e-78	0.425334	0.629	0.304	6.57183e-74	4	FKBP2
2.0855e-78	0.472622	0.959	0.772	7.34515e-74	4	PSMB8
3.73928e-78	0.252011	0.303	0.098	1.31697e-73	4	HACD4
5.82583e-78	0.266157	0.366	0.13	2.05186e-73	4	MLEC
1.07252e-77	0.427013	0.677	0.343	3.7774e-73	4	MAPRE1
1.10151e-77	0.268464	0.347	0.12	3.87951e-73	4	APAF1
1.16901e-77	0.426062	0.758	0.405	4.11724e-73	4	OPTN
1.48364e-77	0.349231	0.562	0.242	5.22538e-73	4	AP1S1
1.60399e-77	0.287579	0.361	0.129	5.64924e-73	4	DBF4
1.9341e-77	0.278335	0.366	0.129	6.8119e-73	4	PAFAH2
2.14364e-77	0.379287	0.539	0.235	7.54991e-73	4	TNFSF4
2.42416e-77	0.447463	0.758	0.43	8.53788e-73	4	PPM1G
2.59933e-77	0.253717	0.332	0.112	9.15485e-73	4	TXNDC17
2.62292e-77	0.473765	0.713	0.37	9.23792e-73	4	MAP4
2.81995e-77	0.40337	0.582	0.271	9.93187e-73	4	TACC1
3.51198e-77	0.415244	0.455	0.19	1.23692e-72	4	C7H15orf41
7.71172e-77	0.596975	0.891	0.666	2.71607e-72	4	ITM2A
1.03725e-76	0.378985	0.598	0.271	3.6532e-72	4	HAT1
1.45423e-76	0.512846	0.624	0.312	5.1218e-72	4	CRY1
1.8006e-76	0.280449	0.406	0.151	6.3417e-72	4	VMA21
1.95968e-76	0.267039	0.368	0.132	6.90198e-72	4	ING2
2.46664e-76	0.472314	0.792	0.457	8.6875e-72	4	NDUFA6
6.84816e-76	0.366963	0.598	0.272	2.41192e-71	4	PSENEN
9.57211e-76	0.273117	0.378	0.137	3.3713e-71	4	NME1
1.35001e-75	0.401134	0.607	0.289	4.75474e-71	4	RBBP4
1.57804e-75	0.306315	0.431	0.169	5.55785e-71	4	DEGS1
1.63139e-75	0.397132	0.673	0.332	5.74575e-71	4	POLR2K
1.65192e-75	0.278971	0.3	0.1	5.81807e-71	4	VCL
1.89012e-75	0.295736	0.415	0.159	6.65701e-71	4	TOMM5
2.19582e-75	0.334321	0.465	0.19	7.73369e-71	4	CISD2
2.91616e-75	0.316324	0.479	0.196	1.02707e-70	4	AIDA
2.96916e-75	0.2626	0.355	0.126	1.04574e-70	4	FLYWCH2
4.0684e-75	0.498923	0.779	0.471	1.43289e-70	4	PPIA
5.02003e-75	0.479004	0.758	0.407	1.76806e-70	4	GRK5
5.40886e-75	0.307398	0.438	0.173	1.905e-70	4	FAM89B
1.74803e-74	0.323641	0.397	0.152	6.15658e-70	4	OSBPL3
2.21778e-74	0.291347	0.317	0.109	7.81102e-70	4	VEGFB
2.97489e-74	0.356025	0.536	0.237	1.04776e-69	4	HDGF
3.17341e-74	0.339367	0.5	0.214	1.11767e-69	4	COPS3
3.4821e-74	0.473167	0.68	0.362	1.2264e-69	4	STRN
5.48592e-74	0.39687	0.732	0.39	1.93214e-69	4	IFI6
5.7643e-74	0.385596	0.529	0.237	2.03019e-69	4	TMX4
6.15543e-74	0.324262	0.434	0.172	2.16794e-69	4	SMIM3
6.56132e-74	0.44617	0.58	0.277	2.3109e-69	4	COX20
7.7954e-74	0.252787	0.332	0.115	2.74554e-69	4	GRN
7.97938e-74	1.60012	0.333	0.138	2.81034e-69	4	HIST1H1D
7.98227e-74	0.455167	0.907	0.649	2.81136e-69	4	NDUFA11
1.07479e-73	0.422324	0.761	0.415	3.78542e-69	4	STUB1
1.22779e-73	0.472802	0.927	0.692	4.32428e-69	4	GNAI2
1.45145e-73	0.364503	0.434	0.177	5.11201e-69	4	RGS1
2.1714e-73	0.449292	0.81	0.48	7.64768e-69	4	COX14
2.23803e-73	0.508897	0.88	0.623	7.88235e-69	4	HSPE1
3.06301e-73	0.405242	0.65	0.324	1.07879e-68	4	PSMG2
3.41701e-73	0.280808	0.428	0.166	1.20347e-68	4	NXT1
4.2186e-73	0.37305	0.618	0.29	1.48579e-68	4	ILF2
4.84235e-73	0.394392	0.568	0.265	1.70548e-68	4	PPP1R12B
5.34332e-73	0.437618	0.951	0.777	1.88192e-68	4	TMA7
6.30236e-73	0.289109	0.431	0.17	2.21969e-68	4	RAB1B
7.1022e-73	0.485034	0.802	0.507	2.50139e-68	4	PA2G4
9.21728e-73	0.28152	0.359	0.131	3.24633e-68	4	CDK2AP1
1.75188e-72	0.412231	0.768	0.425	6.17012e-68	4	PSMA6
1.91069e-72	0.419858	0.819	0.469	6.72946e-68	4	C15H9orf16
2.26004e-72	0.25688	0.359	0.129	7.95988e-68	4	C1H1orf174
2.78564e-72	0.422436	0.712	0.391	9.81102e-68	4	EIF4A3
6.04423e-72	0.251445	0.384	0.141	2.12878e-67	4	CCDC124
1.70215e-71	0.323022	0.457	0.186	5.99498e-67	4	LOC106994675
3.45688e-71	0.399464	0.665	0.332	1.21751e-66	4	IPO9
4.35226e-71	0.312519	0.543	0.237	1.53287e-66	4	NMI
5.28043e-71	0.490891	0.755	0.449	1.85977e-66	4	DDX39A
5.72266e-71	0.289434	0.446	0.18	2.01552e-66	4	AK3
6.18729e-71	0.293471	0.423	0.168	2.17916e-66	4	SLC25A24
7.37765e-71	0.395965	0.712	0.37	2.59841e-66	4	PDCD5
1.30376e-70	0.447171	0.929	0.708	4.59186e-66	4	GABARAP
1.32469e-70	0.382766	0.6	0.29	4.66557e-66	4	COX19
1.37602e-70	0.279918	1	0.993	4.84633e-66	4	TMSB4X
1.83276e-70	0.271803	0.357	0.132	6.45497e-66	4	RAP2A
1.909e-70	0.374467	0.684	0.343	6.72349e-66	4	LSM5
3.0878e-70	0.276472	0.408	0.161	1.08752e-65	4	ARL3
3.68546e-70	0.469066	0.756	0.427	1.29802e-65	4	DENND1B
4.27765e-70	0.338339	0.462	0.196	1.50659e-65	4	FAM126A
4.31167e-70	0.299539	0.452	0.188	1.51857e-65	4	MEA1
4.41983e-70	0.440367	0.71	0.394	1.55666e-65	4	BAZ1B
5.30327e-70	0.284964	0.403	0.158	1.86781e-65	4	AMZ2
1.81347e-69	0.359969	0.553	0.256	6.38705e-65	4	PANK2
2.10026e-69	0.417783	0.83	0.507	7.39712e-65	4	IRF3
2.56487e-69	0.478707	0.897	0.598	9.03348e-65	4	PLAAT3
2.82648e-69	0.325721	0.435	0.179	9.95486e-65	4	TAPBPL
5.76285e-69	0.443069	0.634	0.321	2.02968e-64	4	BMP2K
6.10254e-69	0.451943	0.867	0.579	2.14931e-64	4	SPCS2
6.91482e-69	0.431306	0.95	0.745	2.4354e-64	4	CAPZA1
7.00991e-69	0.408671	0.975	0.884	2.46889e-64	4	FTH1
7.039e-69	0.434697	0.781	0.465	2.47914e-64	4	PSMA1
1.07533e-68	0.274693	0.424	0.169	3.78731e-64	4	PHC2
1.20895e-68	0.416916	0.67	0.349	4.25792e-64	4	COX17
1.63101e-68	0.427475	0.808	0.463	5.74441e-64	4	AGPS
1.9824e-68	0.333313	0.525	0.232	6.98202e-64	4	C7H15orf61
1.99693e-68	0.385892	0.616	0.3	7.03318e-64	4	ULK2
2.09875e-68	0.508638	0.91	0.666	7.39178e-64	4	CALR
2.66757e-68	0.339307	0.522	0.234	9.39518e-64	4	AP1M1
2.7869e-68	0.261549	0.346	0.128	9.81547e-64	4	SSH1
3.14846e-68	0.2566	0.321	0.114	1.10889e-63	4	CEP57L1
3.36987e-68	0.287015	0.424	0.171	1.18687e-63	4	MACROD1
3.78623e-68	0.283563	0.454	0.187	1.33351e-63	4	EBNA1BP2
4.22226e-68	0.271964	0.438	0.177	1.48708e-63	4	SAR1A
4.38218e-68	0.41717	0.838	0.514	1.5434e-63	4	SRP9
4.64547e-68	0.36224	0.413	0.172	1.63613e-63	4	NR4A2
5.43203e-68	0.408635	0.7	0.373	1.91316e-63	4	DNAJC8
5.99074e-68	0.261721	0.356	0.134	2.10994e-63	4	NUP155
7.08845e-68	0.439628	0.897	0.615	2.49655e-63	4	CAST
1.14379e-67	0.382762	0.699	0.363	4.02843e-63	4	POMP
1.20852e-67	0.457259	0.907	0.603	4.25641e-63	4	KLF6
1.96948e-67	0.273358	0.384	0.15	6.93652e-63	4	PNPLA6
4.93524e-67	0.402929	0.881	0.577	1.73819e-62	4	OSTF1
5.33541e-67	0.340167	0.374	0.149	1.87913e-62	4	DDX60
7.78423e-67	0.354257	0.53	0.245	2.7416e-62	4	PRDX1
1.16488e-66	0.399727	0.653	0.336	4.10271e-62	4	ABCF1
1.45472e-66	0.351572	0.524	0.238	5.12353e-62	4	TBCB
1.64242e-66	0.414992	0.923	0.692	5.78462e-62	4	PCBP1
2.6084e-66	0.425091	0.816	0.496	9.18679e-62	4	SNRPE
2.71525e-66	0.384443	0.472	0.21	9.5631e-62	4	SIK2
3.46372e-66	0.538336	0.962	0.872	1.21992e-61	4	STAG1
3.71711e-66	0.453878	0.853	0.546	1.30917e-61	4	CFDP1
4.27076e-66	0.394995	0.71	0.382	1.50416e-61	4	RTN4
4.76597e-66	0.331929	0.539	0.246	1.67857e-61	4	SMARCB1
4.90777e-66	0.387729	0.509	0.234	1.72852e-61	4	ACER3
7.90023e-66	0.324342	0.625	0.298	2.78246e-61	4	HSD17B10
1.05402e-65	0.420228	0.918	0.704	3.71226e-61	4	LOC720636
1.63397e-65	0.451921	0.911	0.687	5.75486e-61	4	ATP5PF
1.94237e-65	0.430694	0.668	0.357	6.84104e-61	4	CMIP
2.68823e-65	0.304388	0.4	0.162	9.46796e-61	4	GALNT10
3.8736e-65	0.295771	0.346	0.133	1.36428e-60	4	BCL2A1
4.35435e-65	0.408026	0.897	0.612	1.5336e-60	4	SAP18
6.94386e-65	0.272959	0.35	0.134	2.44563e-60	4	ACSL5
9.50386e-65	0.353809	0.658	0.331	3.34726e-60	4	AURKAIP1
2.21699e-64	0.348798	0.546	0.259	7.80823e-60	4	LARP7
2.46232e-64	0.432714	0.882	0.609	8.67228e-60	4	EZR
2.47197e-64	0.369002	0.603	0.296	8.70627e-60	4	NOP56
2.90564e-64	0.421737	0.959	0.808	1.02337e-59	4	UQCR
4.68542e-64	0.341652	0.564	0.266	1.6502e-59	4	NAPA
4.79036e-64	0.25453	0.39	0.154	1.68717e-59	4	NFATC2IP
5.63148e-64	0.395583	0.765	0.436	1.98341e-59	4	RER1
6.20866e-64	0.283214	0.444	0.188	2.18669e-59	4	ASNA1
1.2771e-63	0.372776	0.657	0.331	4.49795e-59	4	DPM3
1.28358e-63	0.408385	0.585	0.298	4.52078e-59	4	LRMP
1.43397e-63	0.270086	0.406	0.165	5.05043e-59	4	RCC2
1.9326e-63	0.332867	0.423	0.18	6.80663e-59	4	TSPAN5
2.11757e-63	0.358002	0.598	0.293	7.45807e-59	4	SH3BP1
2.13124e-63	0.416296	0.806	0.491	7.50623e-59	4	ISCA1
2.15126e-63	0.886499	0.634	0.388	7.57672e-59	4	LOC100426197
2.15433e-63	0.383459	0.733	0.403	7.58756e-59	4	MRPL34
2.2088e-63	0.304218	0.506	0.228	7.77941e-59	4	TMX1
2.24342e-63	0.290868	0.465	0.2	7.90133e-59	4	CYCS
3.67715e-63	0.41596	0.894	0.593	1.29509e-58	4	LRRFIP1
3.92392e-63	0.373315	0.573	0.282	1.382e-58	4	C1H1orf35
4.05558e-63	0.262336	0.373	0.148	1.42837e-58	4	B4GALT1
1.05276e-62	0.403106	0.869	0.576	3.70783e-58	4	ATP5PD
1.17411e-62	0.44244	0.911	0.652	4.13523e-58	4	PTPRA
1.25175e-62	0.278561	0.383	0.155	4.40865e-58	4	UBE2Q2
1.59834e-62	0.381502	0.986	0.923	5.62935e-58	4	LOC694289
1.88722e-62	0.385077	0.699	0.38	6.64677e-58	4	GNAI3
2.85718e-62	0.285338	0.506	0.227	1.0063e-57	4	DERL1
3.66798e-62	0.252308	0.356	0.138	1.29186e-57	4	AKIP1
4.09001e-62	0.387086	0.834	0.515	1.4405e-57	4	MAPK1
5.89676e-62	0.358994	0.661	0.344	2.07684e-57	4	MRPS15
7.14724e-62	0.412236	0.79	0.473	2.51726e-57	4	ANXA6
1.08544e-61	0.310951	0.567	0.267	3.82292e-57	4	EMC7
1.59592e-61	0.459124	0.841	0.548	5.62082e-57	4	CD84
2.13553e-61	0.282584	0.509	0.227	7.52134e-57	4	PAFAH1B3
2.42574e-61	0.362613	0.743	0.422	8.54345e-57	4	RBM8A
3.56349e-61	0.36464	0.648	0.336	1.25506e-56	4	PTBP1
4.88611e-61	0.425689	0.769	0.455	1.72089e-56	4	RAD23A
5.21113e-61	0.267819	0.4	0.164	1.83536e-56	4	SNIP1
5.53765e-61	0.308659	0.522	0.241	1.95036e-56	4	NUP205
6.34188e-61	0.348639	0.58	0.286	2.23361e-56	4	PPP1R14B
8.74722e-61	0.272392	0.361	0.144	3.08077e-56	4	DTD1
8.88426e-61	0.355046	0.643	0.328	3.12904e-56	4	NTAN1
9.38026e-61	0.434734	0.91	0.72	3.30373e-56	4	PSIP1
1.12416e-60	0.329258	0.619	0.305	3.95929e-56	4	RAB5C
1.19515e-60	0.300396	0.521	0.238	4.20934e-56	4	GAK
2.21103e-60	0.408291	0.769	0.46	7.78723e-56	4	BST2
3.34003e-60	0.354411	0.645	0.335	1.17636e-55	4	PSMD2
3.86107e-60	0.387512	0.722	0.405	1.35987e-55	4	CTDSPL2
4.11245e-60	0.317725	0.521	0.242	1.4484e-55	4	RAB8A
4.19893e-60	0.374506	0.955	0.773	1.47886e-55	4	ENO1
5.56709e-60	0.363749	0.728	0.407	1.96073e-55	4	NDUFS7
7.60455e-60	0.380984	0.848	0.528	2.67832e-55	4	NDUFA13
7.6769e-60	0.328948	0.651	0.331	2.7038e-55	4	PCMT1
9.26086e-60	0.408399	0.924	0.707	3.26167e-55	4	NDUFA1
1.38507e-59	0.314193	0.567	0.272	4.8782e-55	4	ZCRB1
1.86197e-59	0.306357	0.503	0.23	6.55786e-55	4	NUTF2
1.93496e-59	0.306446	0.514	0.236	6.81494e-55	4	HSBP1
2.21578e-59	0.362291	0.465	0.215	7.80397e-55	4	ABHD17B
3.10224e-59	0.282519	0.502	0.223	1.09261e-54	4	PIN4
4.41763e-59	0.273327	0.294	0.109	1.55589e-54	4	FAM13A
5.67653e-59	0.356379	0.619	0.324	1.99927e-54	4	MRPL57
7.16211e-59	0.440936	0.748	0.466	2.5225e-54	4	LBR
7.96636e-59	0.442917	0.612	0.342	2.80575e-54	4	SLC20A1
1.0731e-58	0.347245	0.64	0.328	3.77947e-54	4	BCAP31
1.78777e-58	0.381695	0.81	0.527	6.29652e-54	4	MRPL51
1.80939e-58	0.398001	0.833	0.536	6.37266e-54	4	ATP5MD
2.45028e-58	0.343174	0.687	0.363	8.62988e-54	4	VPS29
2.95129e-58	0.366731	0.581	0.295	1.03944e-53	4	HLCS
3.12369e-58	0.359104	0.69	0.381	1.10016e-53	4	DPY30
4.30279e-58	0.325817	0.999	0.967	1.51544e-53	4	PITPNC1
4.37103e-58	0.358811	0.672	0.363	1.53948e-53	4	TAP1
6.10323e-58	0.288841	0.389	0.164	2.14956e-53	4	TRIAP1
6.49607e-58	0.334751	0.644	0.331	2.28792e-53	4	IL10RA
6.57818e-58	0.26507	0.404	0.171	2.31683e-53	4	EXOG
6.97361e-58	0.306685	0.499	0.231	2.4561e-53	4	MTLN
8.90411e-58	0.313721	0.557	0.272	3.13603e-53	4	ATP6V0B
1.06787e-57	0.399275	0.883	0.638	3.76103e-53	4	TMEM59
1.22441e-57	0.403796	0.964	0.799	4.31236e-53	4	LOC696748
1.23111e-57	0.258512	0.445	0.193	4.33595e-53	4	PDCL3
1.52025e-57	0.275077	0.425	0.185	5.35433e-53	4	SH2D1A
1.62911e-57	0.285521	0.51	0.236	5.73772e-53	4	PSMC2
1.6753e-57	0.370432	0.995	0.916	5.90039e-53	4	KLF12
2.83777e-57	0.253545	0.463	0.202	9.99461e-53	4	TMEM208
3.64631e-57	0.2926	0.532	0.249	1.28423e-52	4	CHCHD1
4.91791e-57	0.450105	0.873	0.643	1.73209e-52	4	TAF15
4.96959e-57	0.350164	0.641	0.335	1.75029e-52	4	PI4K2B
6.94983e-57	0.264085	0.413	0.18	2.44773e-52	4	OXCT1
6.98876e-57	0.322817	0.568	0.282	2.46144e-52	4	LAMTOR2
1.19161e-56	0.275745	0.474	0.216	4.19685e-52	4	ABCB10
1.35107e-56	0.383273	0.744	0.443	4.75846e-52	4	PRDX6
1.6159e-56	0.262028	0.425	0.185	5.6912e-52	4	RCN2
1.64488e-56	0.333867	0.541	0.268	5.79326e-52	4	CDK5RAP2
1.82054e-56	0.408282	0.93	0.696	6.41193e-52	4	INPP4A
2.85521e-56	0.268575	0.445	0.198	1.00561e-51	4	TMUB1
2.90013e-56	0.26112	0.462	0.206	1.02143e-51	4	TADA3
3.19416e-56	0.351284	0.957	0.806	1.12498e-51	4	COPS9
3.20641e-56	0.348821	0.679	0.374	1.1293e-51	4	PHACTR2
3.61875e-56	0.261996	0.392	0.165	1.27452e-51	4	TNFSF12
4.27298e-56	0.294676	0.488	0.228	1.50494e-51	4	LOC106998762
5.22883e-56	0.293832	0.489	0.227	1.84159e-51	4	SLF2
5.65521e-56	0.2579	0.37	0.155	1.99177e-51	4	TRAK2
6.16423e-56	0.506924	0.802	0.517	2.17104e-51	4	ASCC3
1.1647e-55	0.392737	0.668	0.376	4.10208e-51	4	ANXA5
1.3147e-55	0.385271	0.886	0.639	4.63037e-51	4	SEM1
1.85019e-55	0.283623	0.495	0.232	6.51636e-51	4	NFKBIB
2.75749e-55	0.484629	0.805	0.526	9.71187e-51	4	SPIDR
4.45694e-55	0.397928	0.646	0.365	1.56974e-50	4	RRAS2
4.71518e-55	0.292726	0.293	0.113	1.66069e-50	4	ABCA1
5.4763e-55	0.374638	0.835	0.507	1.92875e-50	4	PDIA3
6.65839e-55	0.390923	0.811	0.517	2.34509e-50	4	ARPC4
9.51298e-55	0.360139	0.805	0.505	3.35047e-50	4	COX5A
1.1392e-54	0.429058	0.788	0.486	4.01226e-50	4	LPP
1.1899e-54	0.272937	0.488	0.225	4.19082e-50	4	MARCH2
1.46325e-54	0.349633	0.728	0.416	5.15357e-50	4	CYC1
2.81389e-54	0.357205	0.645	0.351	9.91052e-50	4	ILF3
2.92055e-54	0.362853	0.692	0.389	1.02862e-49	4	SEPTIN2
3.20976e-54	0.259487	0.451	0.202	1.13048e-49	4	GLTP
4.71711e-54	0.41641	0.937	0.725	1.66137e-49	4	PIK3R5
4.88707e-54	0.35665	0.649	0.351	1.72123e-49	4	ARL2
5.23263e-54	0.314767	0.414	0.188	1.84293e-49	4	CKAP5
5.81899e-54	0.263126	0.46	0.209	2.04945e-49	4	DMAC1
6.50537e-54	0.256146	0.49	0.225	2.29119e-49	4	GPN3
6.91874e-54	0.397305	0.802	0.523	2.43678e-49	4	EID1
6.9525e-54	0.31212	0.536	0.26	2.44867e-49	4	AKIRIN2
9.21085e-54	0.250783	0.347	0.143	3.24406e-49	4	UBXN2B
1.10697e-53	0.279737	0.516	0.245	3.89875e-49	4	PSMC1
1.47916e-53	0.283233	0.473	0.22	5.2096e-49	4	TSPAN32
2.00833e-53	0.362617	0.822	0.522	7.07333e-49	4	ARF5
2.20269e-53	0.331169	0.711	0.401	7.75786e-49	4	MYO5A
4.71795e-53	0.253968	0.45	0.209	1.66166e-48	4	HNRNPLL
1.2543e-52	0.374696	0.792	0.5	4.41765e-48	4	MRPL23
1.84658e-52	0.265101	0.497	0.229	6.50367e-48	4	MRPS14
1.929e-52	0.299363	0.472	0.225	6.79395e-48	4	IFT88
2.07695e-52	0.388399	0.632	0.349	7.31503e-48	4	SLK
2.43352e-52	0.270024	0.46	0.213	8.57084e-48	4	LOC714964
2.64268e-52	0.277131	0.423	0.192	9.3075e-48	4	FOCAD
2.85338e-52	0.352293	0.931	0.749	1.00496e-47	4	SLIRP
3.30256e-52	0.317715	1	0.999	1.16316e-47	4	LOC114673210
5.18431e-52	0.330572	0.667	0.364	1.82591e-47	4	AIM2
5.38304e-52	0.397813	0.854	0.576	1.89591e-47	4	PRKDC
5.531e-52	0.370703	0.962	0.819	1.94802e-47	4	OST4
7.70619e-52	0.403193	0.803	0.522	2.71412e-47	4	MICU2
8.45072e-52	0.323441	0.733	0.43	2.97634e-47	4	OLA1
9.75312e-52	0.25377	0.427	0.192	3.43505e-47	4	CBWD1
1.54364e-51	0.254269	0.485	0.227	5.43668e-47	4	ARL2BP
1.57034e-51	0.327942	0.726	0.415	5.53073e-47	4	LMAN2
2.52987e-51	0.365934	0.763	0.46	8.91022e-47	4	IL10RB
2.98397e-51	0.291491	0.539	0.273	1.05095e-46	4	JPT1
3.44198e-51	0.383202	0.918	0.693	1.21227e-46	4	SP100
3.67199e-51	0.424019	0.545	0.304	1.29328e-46	4	TACC3
7.35304e-51	0.352565	0.745	0.445	2.58974e-46	4	RAC1
8.55408e-51	0.401598	0.825	0.572	3.01275e-46	4	BZW1
8.66466e-51	0.26673	0.489	0.23	3.05169e-46	4	TMEM9B
1.3138e-50	0.372895	0.992	0.897	4.6272e-46	4	JUND
1.4385e-50	0.305235	0.983	0.902	5.06641e-46	4	SRP14
1.85024e-50	0.271287	0.549	0.27	6.51655e-46	4	CTDNEP1
1.99878e-50	0.252186	0.463	0.218	7.03969e-46	4	PRDX3
2.01608e-50	0.34362	0.746	0.435	7.10064e-46	4	HDAC1
2.06265e-50	0.403415	0.83	0.549	7.26467e-46	4	RSRC1
2.57675e-50	0.31179	0.498	0.247	9.0753e-46	4	KIF1B
2.68791e-50	0.353979	0.937	0.7	9.46681e-46	4	LSP1
2.736e-50	0.355693	0.83	0.557	9.63621e-46	4	BRK1
3.00835e-50	0.334743	0.647	0.357	1.05954e-45	4	RAB4A
3.17358e-50	0.287893	0.551	0.279	1.11774e-45	4	GPS2
3.28881e-50	0.385411	0.837	0.555	1.15832e-45	4	INPP5D
3.34812e-50	0.361427	0.916	0.686	1.17921e-45	4	EDF1
3.60602e-50	0.259091	0.455	0.212	1.27004e-45	4	EMC3
3.61181e-50	0.329124	0.532	0.274	1.27208e-45	4	CHD9
5.40877e-50	0.309795	0.627	0.337	1.90497e-45	4	BCL7B
5.61097e-50	0.368728	0.94	0.804	1.97618e-45	4	SRSF7
6.24693e-50	0.330926	0.668	0.379	2.20017e-45	4	MRPS16
7.74227e-50	0.297958	0.605	0.316	2.72683e-45	4	PPIH
9.03116e-50	0.34785	0.897	0.653	3.18077e-45	4	JTB
1.21058e-49	0.260952	0.475	0.224	4.26366e-45	4	IAH1
1.59663e-49	0.309894	0.676	0.37	5.62334e-45	4	ERGIC2
1.83493e-49	0.26482	0.456	0.214	6.46264e-45	4	LGALS3BP
2.12738e-49	0.306281	0.612	0.32	7.49263e-45	4	CDC5L
2.18235e-49	0.310033	0.678	0.373	7.68625e-45	4	LSM8
3.78448e-49	0.296658	0.657	0.359	1.33289e-44	4	MANF
5.32187e-49	0.303707	0.559	0.283	1.87436e-44	4	CCDC115
5.52122e-49	0.328806	0.789	0.479	1.94457e-44	4	GLIPR1
5.7846e-49	0.332847	0.833	0.55	2.03734e-44	4	CLTA
5.78935e-49	0.322724	0.671	0.383	2.03901e-44	4	TRAPPC4
8.68622e-49	0.252908	0.521	0.256	3.05929e-44	4	IMMT
9.41745e-49	0.324213	0.638	0.355	3.31683e-44	4	SPECC1L
1.00951e-48	0.313623	0.656	0.36	3.55548e-44	4	NONO
1.05884e-48	0.368142	0.827	0.561	3.72922e-44	4	TLN1
1.05892e-48	0.25625	0.288	0.118	3.72951e-44	4	LOC114669724
1.14608e-48	0.354087	0.747	0.46	4.03651e-44	4	TXNL4A
1.27749e-48	0.324267	0.997	0.966	4.49933e-44	4	LOC707383
1.38281e-48	0.269125	0.497	0.241	4.87025e-44	4	MRPL52
1.7041e-48	0.301687	0.608	0.317	6.00183e-44	4	PFDN6
2.32181e-48	0.299318	0.644	0.352	8.17742e-44	4	PPP1R18
2.34344e-48	0.355122	0.87	0.608	8.25358e-44	4	S100A6
2.52601e-48	0.278076	0.577	0.294	8.89662e-44	4	COPS8
2.71018e-48	0.287484	0.582	0.308	9.54525e-44	4	MYADM
2.75479e-48	0.358188	0.781	0.478	9.70236e-44	4	KIAA0040
4.24702e-48	0.381795	0.744	0.472	1.4958e-43	4	RAD21
6.58794e-48	0.371023	0.841	0.557	2.32027e-43	4	IL2RG
6.68459e-48	0.332514	0.718	0.42	2.35431e-43	4	TMEM147
6.79711e-48	0.32078	0.632	0.347	2.39394e-43	4	CSGALNACT2
8.29648e-48	0.358815	0.841	0.581	2.92202e-43	4	UBE2I
8.74229e-48	0.328528	0.613	0.345	3.07903e-43	4	PHPT1
1.87494e-47	0.351063	0.719	0.429	6.60355e-43	4	MRPL20
4.10816e-47	0.337262	0.789	0.49	1.44689e-42	4	SF3B6
4.50757e-47	0.263043	0.462	0.225	1.58757e-42	4	OSBPL11
4.64512e-47	0.340793	0.692	0.404	1.63601e-42	4	EIF5B
4.89714e-47	0.260924	0.49	0.24	1.72477e-42	4	UCKL1
5.045e-47	0.329979	0.641	0.362	1.77685e-42	4	KATNBL1
5.74415e-47	0.276672	0.474	0.235	2.02309e-42	4	PARP1
6.66028e-47	0.401437	0.846	0.588	2.34575e-42	4	EIF4A1
7.30004e-47	0.259151	0.377	0.173	2.57107e-42	4	RFWD3
7.36007e-47	0.316743	0.624	0.344	2.59222e-42	4	GUK1
7.62698e-47	0.295804	0.673	0.377	2.68622e-42	4	UBE2L3
8.62513e-47	0.337134	0.665	0.389	3.03777e-42	4	XPO1
1.47472e-46	0.351122	0.985	0.917	5.19398e-42	4	LOC704104
1.52183e-46	0.289216	0.545	0.283	5.35988e-42	4	PRKAR1A
2.94535e-46	0.338402	0.841	0.58	1.03735e-41	4	LSM7
3.31389e-46	0.830717	0.745	0.567	1.16715e-41	4	LOC701976
4.85185e-46	0.294179	0.59	0.312	1.70882e-41	4	RNPS1
5.05442e-46	0.309013	0.517	0.271	1.78017e-41	4	C2CD3
5.21252e-46	0.319524	0.905	0.664	1.83585e-41	4	ATP5PO
5.56476e-46	0.256394	0.436	0.207	1.95991e-41	4	FOXRED1
6.91745e-46	0.254736	0.451	0.219	2.43633e-41	4	SIRT2
8.49815e-46	0.272686	0.528	0.271	2.99305e-41	4	PACSIN2
1.39896e-45	0.32132	0.675	0.388	4.92713e-41	4	BUB3
1.46383e-45	0.26519	0.528	0.269	5.15561e-41	4	DNAJC15
1.56541e-45	0.257547	0.432	0.207	5.51337e-41	4	LOC100423625
1.61019e-45	0.264666	0.523	0.265	5.67108e-41	4	GLRX3
1.63499e-45	0.351126	0.798	0.552	5.75844e-41	4	DAD1
1.68614e-45	0.305289	0.703	0.414	5.93859e-41	4	ELOVL5
1.74718e-45	0.328247	0.82	0.527	6.15357e-41	4	SCP2
3.49576e-45	0.338311	0.897	0.695	1.23121e-40	4	THRAP3
4.61512e-45	0.369462	0.658	0.396	1.62544e-40	4	MAPK8
5.10302e-45	0.430375	0.908	0.725	1.79729e-40	4	GNG2
5.19983e-45	0.280615	0.673	0.367	1.83138e-40	4	NHP2
6.53802e-45	0.331781	0.938	0.744	2.30269e-40	4	ACTR3
7.02367e-45	0.255622	0.475	0.236	2.47374e-40	4	MRPS27
8.92795e-45	0.371888	0.921	0.76	3.14442e-40	4	HNRNPU
1.1894e-44	0.368397	0.765	0.5	4.18905e-40	4	YWHAH
1.1974e-44	0.301625	0.629	0.349	4.21725e-40	4	SLC3A2
1.40383e-44	0.285205	0.575	0.306	4.94427e-40	4	GSDMD
2.14077e-44	0.330468	0.956	0.759	7.53979e-40	4	LOC114669847
2.57864e-44	0.26944	0.416	0.2	9.08195e-40	4	TTLL5
2.6709e-44	0.333058	0.717	0.43	9.4069e-40	4	TMCO1
4.48551e-44	0.303333	0.741	0.441	1.5798e-39	4	REEP5
8.34532e-44	0.304357	0.678	0.395	2.93922e-39	4	GMCL1
8.951e-44	0.312177	0.455	0.232	3.15254e-39	4	ZNF438
9.21821e-44	0.32698	0.79	0.502	3.24665e-39	4	FAM49B
1.13372e-43	0.29192	0.596	0.328	3.99297e-39	4	KLHL2
1.14009e-43	0.341675	0.849	0.592	4.0154e-39	4	SRRM1
1.39045e-43	0.335124	0.906	0.706	4.89716e-39	4	U2AF1
1.58041e-43	0.324667	0.592	0.335	5.56619e-39	4	RIF1
1.7001e-43	0.365805	0.677	0.411	5.98776e-39	4	ATR
3.00509e-43	0.266282	0.576	0.306	1.05839e-38	4	MDH2
3.05929e-43	0.346245	0.884	0.663	1.07748e-38	4	BRD7
3.16379e-43	0.335475	0.907	0.659	1.11429e-38	4	DYNLRB1
4.21103e-43	0.335042	0.854	0.611	1.48312e-38	4	SEC61G
5.92961e-43	0.311343	0.844	0.593	2.08841e-38	4	NDUFB9
7.95354e-43	0.282661	0.323	0.145	2.80124e-38	4	STX2
8.04134e-43	0.25666	0.467	0.236	2.83216e-38	4	CEP295
9.68531e-43	0.306984	0.914	0.667	3.41117e-38	4	STK10
9.9797e-43	0.383359	0.974	0.861	3.51485e-38	4	KEG06-r02
1.6293e-42	0.253324	0.523	0.27	5.7384e-38	4	CASP8AP2
1.98898e-42	0.263072	0.565	0.297	7.0052e-38	4	RPN1
2.12188e-42	0.31557	0.681	0.396	7.47325e-38	4	ABHD17A
2.36488e-42	0.272909	0.488	0.252	8.32912e-38	4	OTULIN
2.70842e-42	0.305957	0.568	0.315	9.53906e-38	4	RGS19
4.27659e-42	0.359316	0.742	0.476	1.50622e-37	4	DYNLL1
4.79579e-42	0.320329	0.827	0.571	1.68908e-37	4	SNU13
6.73476e-42	0.257658	0.997	0.974	2.37198e-37	4	GMFG
1.5045e-41	0.275788	0.632	0.352	5.29883e-37	4	ATP2A3
1.62822e-41	0.250234	0.529	0.278	5.7346e-37	4	PSMC4
1.71518e-41	0.263972	0.57	0.31	6.04087e-37	4	ABHD12
1.86244e-41	0.287398	0.62	0.346	6.55951e-37	4	CSNK2B
1.9116e-41	0.282651	0.618	0.347	6.73265e-37	4	CANX
2.21814e-41	0.372487	0.889	0.693	7.8123e-37	4	OSBPL8
2.50024e-41	0.258236	0.584	0.315	8.80584e-37	4	NDUFA5
2.56637e-41	0.319037	0.659	0.391	9.03875e-37	4	HMGA1
3.1189e-41	0.337451	0.927	0.716	1.09848e-36	4	PICALM
3.80656e-41	0.279874	0.743	0.446	1.34067e-36	4	PRMT2
4.17494e-41	0.275278	0.627	0.358	1.47041e-36	4	RBM17
5.38869e-41	0.25722	0.544	0.29	1.8979e-36	4	SEPHS2
1.00204e-40	0.276178	0.661	0.373	3.52919e-36	4	FLII
1.65456e-40	0.292317	0.72	0.425	5.82738e-36	4	FKBP8
1.84656e-40	0.304888	0.72	0.441	6.50359e-36	4	CFAP299
3.26139e-40	0.322068	0.767	0.494	1.14866e-35	4	PTPN1
4.86976e-40	0.339586	0.808	0.532	1.71513e-35	4	SLC4A7
8.4853e-40	0.283377	0.701	0.42	2.98852e-35	4	CPLANE1
9.288e-40	0.253563	0.522	0.277	3.27123e-35	4	ZMAT2
1.38506e-39	0.260158	0.58	0.314	4.87818e-35	4	WBP11
1.88669e-39	0.359893	0.849	0.616	6.64493e-35	4	CD6
2.27024e-39	0.312512	0.8	0.514	7.99578e-35	4	NDUFA7
3.31553e-39	0.259349	0.586	0.325	1.16773e-34	4	UFD1
4.73754e-39	0.327939	0.956	0.803	1.66856e-34	4	NCL
4.78314e-39	0.31085	0.86	0.62	1.68462e-34	4	DDX46
6.32065e-39	0.259457	0.582	0.322	2.22613e-34	4	CKLF
6.71479e-39	0.271718	0.636	0.373	2.36495e-34	4	ANTXR2
6.73519e-39	0.303434	0.88	0.642	2.37214e-34	4	ATP6V0E1
6.74346e-39	0.278805	0.687	0.403	2.37505e-34	4	NDUFAB1
7.50367e-39	0.262353	0.629	0.353	2.64279e-34	4	SREK1IP1
1.09893e-38	0.274259	0.5	0.266	3.87042e-34	4	LOC716589
1.6678e-38	0.261573	0.587	0.322	5.874e-34	4	NME4
1.78553e-38	0.3079	0.603	0.351	6.28865e-34	4	MYO9A
2.0545e-38	0.266766	0.362	0.177	7.23595e-34	4	C3H21orf91
2.48784e-38	0.264391	0.621	0.353	8.76216e-34	4	TMEM14C
2.49128e-38	0.306695	0.73	0.465	8.7743e-34	4	CSPP1
3.00099e-38	0.339552	0.735	0.474	1.05695e-33	4	ATP9B
3.57321e-38	0.331466	0.849	0.609	1.25848e-33	4	PTBP3
6.63436e-38	0.281151	0.673	0.404	2.33662e-33	4	LOC701223
7.98838e-38	0.271943	0.7	0.418	2.81351e-33	4	CERKL
1.6556e-37	0.259172	0.585	0.327	5.83103e-33	4	WDR1
1.93137e-37	0.264657	0.676	0.404	6.80227e-33	4	PSMA4
1.93906e-37	0.257872	0.666	0.383	6.82936e-33	4	PSMD4
2.52329e-37	0.251752	0.51	0.275	8.88702e-33	4	SLX4IP
2.55081e-37	0.268655	0.68	0.404	8.98396e-33	4	ATG3
2.66512e-37	0.289949	0.934	0.785	9.38654e-33	4	PPIB
2.66989e-37	0.284149	0.711	0.444	9.40336e-33	4	ELF2
3.60897e-37	0.341416	0.799	0.557	1.27108e-32	4	RGCC
3.84222e-37	0.308666	0.789	0.526	1.35323e-32	4	TCEA1
3.88603e-37	0.302677	0.522	0.293	1.36866e-32	4	ST3GAL3
3.99288e-37	0.350172	0.832	0.597	1.40629e-32	4	HP1BP3
6.79723e-37	0.272911	0.699	0.428	2.39398e-32	4	COMMD1
7.79236e-37	0.268533	0.579	0.326	2.74447e-32	4	FNTA
1.16481e-36	0.27205	0.959	0.801	4.10247e-32	4	CAPZB
1.35677e-36	0.301857	0.579	0.339	4.77854e-32	4	QKI
1.5536e-36	0.266617	0.64	0.374	5.47176e-32	4	NPTN
1.71686e-36	0.28065	0.715	0.44	6.04679e-32	4	UBE2V1
2.27246e-36	0.277583	0.704	0.431	8.00361e-32	4	SF3B2
2.98266e-36	0.255811	0.621	0.356	1.05049e-31	4	UQCC3
4.31459e-36	0.280567	0.678	0.418	1.5196e-31	4	MAGOH
7.45298e-36	0.254625	0.627	0.369	2.62494e-31	4	NT5DC1
7.61628e-36	0.631904	0.527	0.366	2.68245e-31	4	LOC106995452
8.2631e-36	0.265199	0.641	0.373	2.91026e-31	4	POLR2F
1.01839e-35	0.317344	0.761	0.524	3.58676e-31	4	TPR
1.24532e-35	0.30783	0.846	0.64	4.38601e-31	4	HNRNPD
1.93271e-35	0.255437	0.448	0.241	6.80701e-31	4	DOP1A
1.9411e-35	0.270442	0.569	0.328	6.83656e-31	4	TNFAIP3
2.23333e-35	0.327771	0.786	0.528	7.8658e-31	4	KIAA1328
3.80623e-35	0.34925	0.864	0.654	1.34055e-30	4	PBRM1
4.42476e-35	0.275641	0.678	0.406	1.5584e-30	4	VASP
7.89912e-35	0.266417	0.715	0.44	2.78207e-30	4	TAF7
9.73206e-35	0.277842	0.799	0.542	3.42763e-30	4	HNRNPA0
1.36974e-34	0.271626	0.794	0.522	4.82422e-30	4	VDAC2
1.57862e-34	0.25789	0.647	0.376	5.5599e-30	4	NARS
4.70596e-34	0.292393	0.71	0.448	1.65744e-29	4	EIF5A
7.29396e-34	0.341362	0.552	0.333	2.56893e-29	4	GLUD1
8.27435e-34	0.28857	0.675	0.417	2.91422e-29	4	SOD1
1.33596e-33	0.279868	0.792	0.521	4.70525e-29	4	RABAC1
1.68318e-33	0.307618	0.788	0.541	5.92817e-29	4	HNRNPUL1
1.81406e-33	0.315908	0.884	0.669	6.38912e-29	4	HERC1
2.26951e-33	0.281787	0.981	0.871	7.99321e-29	4	PTPRCAP
2.98499e-33	0.310152	0.672	0.426	1.05131e-28	4	SPAG9
3.06607e-33	0.26505	0.673	0.412	1.07987e-28	4	SRPK1
3.41301e-33	0.283175	0.904	0.689	1.20206e-28	4	YWHAZ
4.91539e-33	0.26514	0.987	0.909	1.7312e-28	4	CD3G
5.01357e-33	0.317314	0.716	0.487	1.76578e-28	4	FUT8
7.57483e-33	0.256686	0.721	0.449	2.66786e-28	4	CHCHD3
8.6142e-33	0.267362	0.876	0.667	3.03392e-28	4	XRCC6
1.0427e-32	0.296133	0.887	0.692	3.67239e-28	4	PRPF4B
1.2877e-32	0.265208	0.478	0.269	4.53529e-28	4	MCU
1.29835e-32	0.251083	0.632	0.373	4.57279e-28	4	SNX3
1.31179e-32	0.271533	0.751	0.492	4.62012e-28	4	SARNP
1.51648e-32	0.287822	0.8	0.558	5.34104e-28	4	YWHAE
1.72772e-32	0.289851	0.903	0.699	6.08501e-28	4	RASSF1
4.01296e-32	0.299019	0.924	0.75	1.41336e-27	4	DOCK2
4.42131e-32	0.304039	0.793	0.562	1.55719e-27	4	LSM4
1.56578e-31	0.277674	0.893	0.714	5.51467e-27	4	C5H4orf3
2.09915e-31	0.280141	0.77	0.504	7.3932e-27	4	RTF1
2.57375e-31	0.275726	0.865	0.63	9.06475e-27	4	PPIG
2.8081e-31	0.252197	0.704	0.44	9.89011e-27	4	CD226
2.99799e-31	0.250396	0.773	0.508	1.05589e-26	4	ATXN7L1
3.10656e-31	0.302016	0.922	0.736	1.09413e-26	4	SIK3
8.24827e-31	0.253315	0.746	0.5	2.90504e-26	4	CIAO2B
1.02336e-30	0.253615	0.653	0.404	3.60426e-26	4	GADD45GIP1
1.64461e-30	0.287828	0.794	0.555	5.79232e-26	4	NSMCE2
2.17918e-30	0.265956	0.757	0.492	7.67508e-26	4	BRD9
2.19866e-30	0.257671	0.853	0.604	7.74367e-26	4	MOB2
5.01242e-30	0.283114	0.776	0.52	1.76538e-25	4	CIB1
6.20188e-30	0.26478	0.832	0.577	2.1843e-25	4	TMEM219
6.69088e-30	0.276405	0.826	0.579	2.35653e-25	4	POLR2L
1.56897e-29	0.260631	0.835	0.6	5.52593e-25	4	NDUFB8
1.88556e-29	0.261424	0.759	0.499	6.64095e-25	4	CWC15
2.45539e-29	0.268677	0.846	0.609	8.64789e-25	4	NDUFA2
4.24924e-29	0.310877	0.756	0.516	1.49658e-24	4	PIK3R1
7.38692e-29	0.274296	0.653	0.414	2.60167e-24	4	CNST
7.64453e-29	0.268505	0.86	0.615	2.6924e-24	4	RBPMS
1.75532e-28	0.271361	0.775	0.526	6.18225e-24	4	NEK7
2.54356e-28	0.324928	0.647	0.431	8.95842e-24	4	TUBA4A
2.83807e-28	0.271338	0.794	0.548	9.99568e-24	4	DDHD1
3.11857e-28	0.26768	0.805	0.559	1.09836e-23	4	TSPO
4.37058e-28	0.256772	0.888	0.683	1.53932e-23	4	NDUFC1
6.48458e-28	0.259786	0.962	0.859	2.28387e-23	4	COX6C
1.1012e-27	0.254215	0.758	0.5	3.87843e-23	4	GHITM
1.35369e-27	0.346397	0.981	0.897	4.76771e-23	4	LOC703029
3.75726e-27	0.295983	0.733	0.501	1.32331e-22	4	LOC100424348
1.07675e-26	0.254866	0.739	0.498	3.79232e-22	4	MAMU-E
1.30425e-26	0.273219	0.813	0.606	4.59356e-22	4	DIAPH2
1.92942e-26	0.254682	0.781	0.548	6.79543e-22	4	DYNLT1
6.03433e-26	0.257333	0.994	0.922	2.12529e-21	4	FKBP5
8.58486e-25	0.268757	0.911	0.733	3.02359e-20	4	WNK1
1.17145e-24	0.258601	0.917	0.746	4.12584e-20	4	TRA2B
6.35152e-24	0.25645	0.833	0.639	2.23701e-19	4	APRT
8.66272e-24	0.252998	0.866	0.676	3.05101e-19	4	URI1
5.08658e-23	0.251506	0.836	0.628	1.7915e-18	4	RAPGEF1
2.85991e-22	0.267338	0.768	0.552	1.00726e-17	4	PDS5B
3.76001e-22	0.403831	0.324	0.197	1.32427e-17	4	APBB2

## Sheet: Cluster 5
p_val	avg_log2FC	pct.1	pct.2	p_val_adj	cluster	gene
0	4.47796	0.441	0.02	0	5	GZMA
1.24078e-239	3.30343	0.671	0.206	4.37001e-235	5	GZMB
2.0226e-217	2.50944	0.266	0.031	7.12359e-213	5	GZMK
7.79224e-139	0.712441	0.997	0.994	2.74443e-134	5	TMSB4X
3.90841e-138	3.20766	0.483	0.161	1.37654e-133	5	GNLY
1.50709e-128	1.93445	0.936	0.951	5.30799e-124	5	ACTG1
9.79155e-116	1.85073	0.546	0.204	3.44859e-111	5	NKG7
1.18728e-104	3.21956	0.401	0.139	4.18159e-100	5	HIST1H1D
1.13357e-73	1.32661	0.675	0.375	3.99245e-69	5	S100A4
2.09876e-51	1.89462	0.364	0.179	7.39183e-47	5	HOPX
1.24338e-48	1.41025	0.76	0.827	4.37917e-44	5	VIM
3.7355e-46	1.35012	0.744	0.848	1.31564e-41	5	GAPDH
1.10434e-45	0.729377	0.899	0.973	3.8895e-41	5	LOC705671
6.16147e-42	2.27505	0.517	0.411	2.17007e-37	5	HMGB2
2.04875e-40	0.995168	0.795	0.947	7.21569e-36	5	CFL1
6.152e-40	0.684534	0.804	0.979	2.16673e-35	5	GMFG
3.12558e-39	1.18665	0.778	0.934	1.10083e-34	5	PFN1
1.265e-38	1.63394	0.37	0.205	4.45532e-34	5	CST7
2.04355e-38	1.117	0.77	0.944	7.19738e-34	5	UBB
3.28349e-38	1.98104	0.562	0.505	1.15644e-33	5	STMN1
3.31062e-38	0.367506	0.997	0.998	1.166e-33	5	B2M
2.19108e-36	0.496478	0.894	0.988	7.71698e-32	5	RPS2
2.08744e-34	1.76836	0.66	0.753	7.35195e-30	5	H2AFZ
2.52928e-34	1.39201	0.335	0.174	8.90811e-30	5	GZMH
1.25116e-32	0.823413	0.833	0.976	4.40659e-28	5	CALM1
1.07545e-31	0.271374	0.262	0.641	3.78775e-27	5	XRCC5
2.83346e-31	0.413295	0.953	0.99	9.97944e-27	5	TMSB10
3.36639e-29	0.921808	0.757	0.933	1.18564e-24	5	ARPC2
3.5415e-28	0.840655	0.754	0.954	1.24732e-23	5	OAZ1
5.14262e-28	1.78516	0.345	0.221	1.81123e-23	5	C11H12orf75
1.85017e-27	0.397217	0.279	0.656	6.51629e-23	5	HNRNPD
2.80807e-27	0.332844	0.287	0.659	9.89001e-23	5	MTDH
5.66884e-27	0.251849	0.237	0.565	1.99657e-22	5	DYNLT1
1.1943e-26	0.25166	0.211	0.53	4.20632e-22	5	H2AFY
1.89512e-26	0.982464	0.744	0.924	6.67462e-22	5	LOC704104
2.73436e-26	1.03504	0.731	0.909	9.63041e-22	5	ARPC1B
3.62429e-26	0.261299	0.248	0.578	1.27648e-21	5	TLN1
1.2331e-25	0.690111	0.8	0.946	4.34298e-21	5	SH3BGRL3
1.93598e-25	0.307791	0.24	0.575	6.81851e-21	5	YWHAE
4.90211e-25	0.576829	0.797	0.984	1.72652e-20	5	ARHGDIB
1.32185e-24	0.267631	0.222	0.53	4.65556e-20	5	EIF4G2
1.69215e-24	0.355699	0.172	0.448	5.95976e-20	5	LOC713572
2.73029e-24	0.443052	0.275	0.581	9.61609e-20	5	LOC701976
2.87027e-24	0.278118	0.357	0.741	1.01091e-19	5	GNG2
8.64994e-24	0.297091	0.316	0.684	3.04651e-19	5	XRCC6
2.48917e-23	0.309588	0.179	0.447	8.76686e-19	5	SF3B2
5.85682e-23	1.49272	0.633	0.759	2.06277e-18	5	LOC705636
8.86491e-23	0.279686	0.121	0.348	3.12222e-18	5	IQGAP1
1.33969e-22	1.82101	0.528	0.545	4.7184e-18	5	TUBA1B
1.35195e-22	1.44656	0.631	0.783	4.76158e-18	5	ENO1
2.62405e-22	0.832729	0.866	0.995	9.24191e-18	5	LOC114673461
3.5975e-22	0.347509	0.227	0.529	1.26704e-17	5	VCP
7.43369e-22	0.335507	0.34	0.722	2.61814e-17	5	U2AF1
1.00943e-21	0.306976	0.227	0.518	3.55522e-17	5	RALY
2.02903e-21	0.303828	0.415	0.847	7.14626e-17	5	SEPTIN7
3.88689e-21	0.253455	0.277	0.603	1.36896e-16	5	AIP
6.42098e-21	0.291379	0.295	0.634	2.26147e-16	5	PTP4A2
7.98064e-21	0.298811	0.238	0.538	2.81078e-16	5	LOC114679371
1.65951e-20	0.260145	0.206	0.478	5.84479e-16	5	CDV3
4.61104e-20	0.33958	0.246	0.54	1.62401e-15	5	EID1
5.20626e-20	0.331515	0.108	0.307	1.83364e-15	5	REL
7.96928e-20	0.267659	0.222	0.501	2.80678e-15	5	SRP19
8.66644e-20	2.06116	0.372	0.291	3.05232e-15	5	LOC114677671
8.75654e-20	0.459955	0.213	0.488	3.08405e-15	5	RAD21
1.33856e-19	0.358495	0.291	0.631	4.7144e-15	5	C14H11orf58
1.46673e-19	0.301803	0.28	0.597	5.16583e-15	5	SPCS2
1.73884e-19	0.265769	0.242	0.536	6.12418e-15	5	LOC700087
1.74073e-19	0.303452	0.187	0.437	6.13085e-15	5	ARL5A
1.88725e-19	0.307963	0.913	0.988	6.64688e-15	5	RPLP0
1.93605e-19	0.282824	0.385	0.77	6.81876e-15	5	SET
2.03501e-19	0.279388	0.346	0.721	7.16729e-15	5	CD81
2.37023e-19	0.296535	0.316	0.655	8.34794e-15	5	TMEM59
2.59692e-19	0.459525	0.375	0.76	9.14634e-15	5	ACTR3
3.49132e-19	0.307766	0.322	0.67	1.22964e-14	5	UQCRQ
4.45952e-19	0.252912	0.931	0.99	1.57064e-14	5	RPL3
4.50511e-19	0.327722	0.348	0.712	1.5867e-14	5	GABARAPL2
4.7105e-19	0.272527	0.404	0.819	1.65904e-14	5	SRSF7
4.73525e-19	0.393155	0.804	0.984	1.66775e-14	5	EEF1B2
7.02224e-19	0.266771	0.407	0.789	2.47323e-14	5	LAT
1.25205e-18	0.376251	0.235	0.517	4.40971e-14	5	YWHAH
1.57459e-18	0.264495	0.211	0.469	5.54572e-14	5	SUCLG1
1.62675e-18	0.251043	0.164	0.396	5.72943e-14	5	BLOC1S2
1.89857e-18	0.345041	0.179	0.422	6.68675e-14	5	MBD2
1.93436e-18	0.377224	0.254	0.542	6.81282e-14	5	FKBP1A
2.28591e-18	0.34065	0.343	0.692	8.05098e-14	5	HNRNPA3
2.7597e-18	0.313827	0.166	0.395	9.71968e-14	5	MRPS16
3.28619e-18	0.271723	0.351	0.723	1.1574e-13	5	ROMO1
3.73323e-18	0.261967	0.221	0.48	1.31484e-13	5	COMT
4.50615e-18	0.291778	0.169	0.398	1.58707e-13	5	MYO1G
4.54894e-18	0.254541	0.256	0.536	1.60214e-13	5	TMEM50A
5.08206e-18	0.331081	0.18	0.419	1.7899e-13	5	GADD45GIP1
5.17968e-18	0.26773	0.187	0.43	1.82428e-13	5	PPP4C
5.20376e-18	0.312455	0.23	0.504	1.83276e-13	5	CCT8
6.52927e-18	0.319711	0.19	0.432	2.29961e-13	5	CAMLG
8.86564e-18	0.271231	0.171	0.397	3.12248e-13	5	DPY30
9.27185e-18	0.382597	0.158	0.37	3.26555e-13	5	ARAP2
1.21752e-17	0.274139	0.143	0.352	4.28811e-13	5	FKBP3
1.22082e-17	0.508913	0.213	0.474	4.29973e-13	5	SMC3
1.30533e-17	0.313945	0.179	0.413	4.59739e-13	5	ENY2
1.82999e-17	0.86152	0.718	0.937	6.44524e-13	5	CORO1A
1.92841e-17	0.300644	0.124	0.322	6.79187e-13	5	MRPS9
2.11261e-17	0.456967	0.245	0.522	7.44061e-13	5	RHEB
2.15282e-17	0.26284	0.206	0.462	7.58222e-13	5	NDUFB5
2.39101e-17	0.331936	0.362	0.721	8.42113e-13	5	HNRNPM
3.35399e-17	0.371922	0.298	0.627	1.18128e-12	5	NDUFB4
4.08444e-17	0.350657	0.147	0.355	1.43854e-12	5	STRAP
4.48477e-17	0.408574	0.251	0.535	1.57954e-12	5	YWHAQ
4.55056e-17	0.31009	0.14	0.341	1.60271e-12	5	TNFAIP3
4.74573e-17	0.359996	0.282	0.588	1.67145e-12	5	MGST3
5.41202e-17	0.325129	0.28	0.587	1.90611e-12	5	SNRPD2
5.42921e-17	0.256797	0.271	0.569	1.91217e-12	5	POLR1D
6.02423e-17	0.416336	0.232	0.505	2.12173e-12	5	GTF2H5
6.80561e-17	0.362414	0.159	0.377	2.39694e-12	5	CSK
8.26572e-17	0.302998	0.153	0.36	2.91119e-12	5	GSTK1
8.39049e-17	0.32138	0.147	0.345	2.95513e-12	5	GLUD1
8.71869e-17	0.273458	0.176	0.4	3.07072e-12	5	PUF60
9.66052e-17	0.333067	0.911	0.99	3.40243e-12	5	RPS9
1.03751e-16	0.311366	0.161	0.38	3.65411e-12	5	VPS29
1.07608e-16	0.352629	0.195	0.437	3.78994e-12	5	TMEM147
1.09487e-16	0.374234	0.32	0.628	3.85614e-12	5	RORA
1.16051e-16	0.402858	0.254	0.546	4.08731e-12	5	NDUFA13
1.27519e-16	0.268579	0.19	0.421	4.49121e-12	5	VASP
1.51856e-16	0.256357	0.166	0.378	5.34836e-12	5	PCNP
1.68013e-16	0.379651	0.185	0.42	5.91741e-12	5	ATG3
1.81752e-16	0.315749	0.129	0.317	6.40129e-12	5	TACC3
1.90743e-16	0.370986	0.222	0.482	6.71796e-12	5	LBR
2.02734e-16	0.280101	0.245	0.516	7.1403e-12	5	GHITM
2.13372e-16	0.274362	0.29	0.593	7.51497e-12	5	LOC717879
2.2198e-16	0.333649	0.211	0.462	7.81814e-12	5	PDLIM2
2.41595e-16	0.262658	0.118	0.299	8.50899e-12	5	TCP1
2.58646e-16	0.278036	0.11	0.286	9.10951e-12	5	TOPBP1
3.01428e-16	0.389889	0.396	0.769	1.06163e-11	5	SSB
3.06465e-16	0.303501	0.192	0.424	1.07937e-11	5	PFDN2
3.18722e-16	0.301155	0.15	0.352	1.12254e-11	5	BCL7B
3.19297e-16	0.289312	0.246	0.515	1.12456e-11	5	CWC15
3.3346e-16	0.295474	0.192	0.428	1.17445e-11	5	CDC37
3.77776e-16	0.370326	0.227	0.493	1.33053e-11	5	TMEM160
4.29928e-16	0.25629	0.145	0.344	1.51421e-11	5	NTAN1
4.37644e-16	0.260567	0.111	0.287	1.54138e-11	5	HAT1
4.63328e-16	0.283991	0.153	0.352	1.63184e-11	5	SDF4
9.57973e-16	0.257929	0.229	0.471	3.37398e-11	5	PTPRJ
1.09923e-15	0.302537	0.148	0.349	3.8715e-11	5	SRSF1
1.31503e-15	0.350633	0.201	0.435	4.63155e-11	5	TRAPPC5
1.37995e-15	0.258429	0.155	0.358	4.8602e-11	5	COPS5
1.58413e-15	0.324795	0.221	0.457	5.57931e-11	5	ITGAL
1.63184e-15	0.255977	0.121	0.299	5.74734e-11	5	RBFA
1.72988e-15	0.668711	0.692	0.701	6.09264e-11	5	LOC114669738
2.00723e-15	0.411756	0.275	0.568	7.06947e-11	5	TMBIM6
2.12307e-15	0.387908	0.25	0.519	7.47746e-11	5	FAM49B
2.62478e-15	0.349757	0.256	0.521	9.24448e-11	5	SERP1
2.62517e-15	0.346688	0.238	0.491	9.24585e-11	5	ANXA6
2.82768e-15	0.315013	0.176	0.388	9.95911e-11	5	SNX3
3.51238e-15	0.267893	0.919	0.989	1.23706e-10	5	RPL8
3.94157e-15	0.253548	0.116	0.287	1.38822e-10	5	TACC1
4.31681e-15	0.362884	0.185	0.407	1.52038e-10	5	PDCD6
4.44386e-15	0.343008	0.177	0.39	1.56513e-10	5	BCL7C
4.55041e-15	0.309264	0.184	0.403	1.60265e-10	5	SELENOK
4.71331e-15	0.325223	0.357	0.706	1.66003e-10	5	ATP5MF
5.15916e-15	0.255299	0.134	0.319	1.81706e-10	5	LSM10
5.71365e-15	0.276357	0.156	0.351	2.01235e-10	5	UBE2L6
5.88493e-15	0.2902	0.171	0.379	2.07267e-10	5	TAP1
5.97481e-15	0.324471	0.248	0.507	2.10433e-10	5	SF3B6
6.02221e-15	0.35417	0.233	0.492	2.12102e-10	5	ATP6V1F
6.59427e-15	0.448007	0.13	0.313	2.3225e-10	5	VRK1
7.16309e-15	0.328527	0.425	0.82	2.52284e-10	5	HNRNPK
7.47364e-15	0.339037	0.3	0.595	2.63222e-10	5	OSTF1
7.47797e-15	0.427751	0.182	0.394	2.63374e-10	5	PSMD13
7.57468e-15	0.341604	0.33	0.656	2.6678e-10	5	TMEM14B
7.69928e-15	0.282058	0.208	0.441	2.71169e-10	5	FKBP8
7.97598e-15	0.454153	0.738	0.977	2.80914e-10	5	FTL
8.85223e-15	0.268704	0.192	0.411	3.11776e-10	5	ABHD17A
1.01431e-14	0.273035	0.303	0.6	3.57239e-10	5	ALDOA
1.16014e-14	0.326507	0.213	0.447	4.086e-10	5	ATOX1
1.22791e-14	0.314542	0.214	0.453	4.32471e-10	5	BSG
1.33011e-14	0.512773	0.75	0.969	4.68465e-10	5	UBC
1.45169e-14	0.399645	0.225	0.475	5.11286e-10	5	SFT2D1
1.45678e-14	0.39643	0.201	0.433	5.13078e-10	5	MAGOH
1.60954e-14	0.341263	0.203	0.433	5.6688e-10	5	SF3B5
1.6768e-14	0.26061	0.18	0.391	5.9057e-10	5	LFNG
1.77839e-14	0.430164	0.995	0.999	6.26348e-10	5	LOC109910387
1.78997e-14	0.470213	0.393	0.766	6.30426e-10	5	SERBP1
1.86394e-14	1.89938	0.277	0.204	6.5648e-10	5	SERPINB1
2.33455e-14	0.582729	0.243	0.511	8.22229e-10	5	TALDO1
2.3771e-14	0.270782	0.385	0.744	8.37213e-10	5	ELOB
2.41238e-14	0.373595	0.111	0.279	8.49639e-10	5	GLRX3
2.4412e-14	0.322382	0.148	0.338	8.59791e-10	5	EMC6
2.77647e-14	0.294565	0.143	0.327	9.77872e-10	5	SDHB
3.08793e-14	0.334266	0.269	0.538	1.08757e-09	5	RABAC1
3.2044e-14	0.416262	0.235	0.478	1.12859e-09	5	CCDC69
3.56994e-14	0.256686	0.274	0.546	1.25733e-09	5	LAMTOR4
3.89054e-14	0.456553	0.258	0.53	1.37025e-09	5	MDH1
4.04369e-14	0.406612	0.222	0.459	1.42419e-09	5	CCT2
4.29356e-14	0.546929	0.205	0.434	1.51219e-09	5	PKM
4.33504e-14	0.25024	0.153	0.337	1.5268e-09	5	SELPLG
5.65088e-14	0.362047	0.198	0.416	1.99024e-09	5	PGLS
5.76883e-14	0.331836	0.345	0.671	2.03178e-09	5	SHISA5
6.76238e-14	0.316825	0.254	0.516	2.38171e-09	5	NCBP2
6.90813e-14	0.323369	0.156	0.346	2.43304e-09	5	IL10RA
8.3195e-14	0.271225	0.126	0.297	2.93013e-09	5	C1H1orf35
8.57224e-14	0.338054	0.264	0.529	3.01914e-09	5	S1PR4
8.57646e-14	0.352604	0.19	0.404	3.02063e-09	5	BUB3
8.7099e-14	0.270401	0.127	0.297	3.06763e-09	5	COPZ1
9.1792e-14	0.446985	0.33	0.656	3.23291e-09	5	SEM1
9.26215e-14	0.27046	0.161	0.353	3.26213e-09	5	GTF2A2
9.63003e-14	0.257089	0.127	0.296	3.3917e-09	5	PRKAR1A
9.91779e-14	0.32113	0.116	0.28	3.49304e-09	5	CMC1
1.04501e-13	0.461495	0.142	0.323	3.68054e-09	5	ARL6IP1
1.13805e-13	0.531749	0.135	0.31	4.00822e-09	5	RRM1
1.31185e-13	0.57367	0.208	0.433	4.62034e-09	5	SQSTM1
1.37877e-13	0.410074	0.254	0.517	4.85604e-09	5	MRPL23
1.44907e-13	0.312065	0.122	0.288	5.10361e-09	5	HPRT1
1.51279e-13	0.606111	0.171	0.37	5.32805e-09	5	GPRIN3
1.64947e-13	0.452062	0.184	0.387	5.80944e-09	5	PDCD5
1.71931e-13	0.556484	0.721	0.966	6.05542e-09	5	NME2
1.81853e-13	0.441271	0.329	0.64	6.40487e-09	5	HSPE1
1.81974e-13	0.291167	0.2	0.408	6.40912e-09	5	IRF1
1.88044e-13	0.31044	0.169	0.364	6.6229e-09	5	SLC3A2
1.8927e-13	0.356325	0.176	0.377	6.66608e-09	5	ORAI1
1.91818e-13	1.36878	0.597	0.756	6.75582e-09	5	PSMB9
2.0063e-13	0.58416	0.353	0.684	7.0662e-09	5	NUCKS1
2.01759e-13	0.573286	0.3	0.598	7.10594e-09	5	UBE2I
2.19743e-13	0.302183	0.138	0.314	7.73936e-09	5	PMPCB
2.42517e-13	0.258794	0.184	0.38	8.54143e-09	5	AIM2
2.65271e-13	0.32064	0.156	0.339	9.34284e-09	5	ANAPC13
2.70297e-13	0.314106	0.108	0.259	9.51987e-09	5	DESI2
2.88183e-13	0.307642	0.308	0.595	1.01498e-08	5	POLR2L
3.00659e-13	0.282965	0.977	1	1.05892e-08	5	LOC114673210
3.12601e-13	0.392862	0.205	0.424	1.10098e-08	5	UBE2N
3.77261e-13	0.440086	0.216	0.447	1.32871e-08	5	SEC11A
3.812e-13	0.257956	0.151	0.334	1.34258e-08	5	RNASET2
4.1166e-13	0.352848	0.227	0.466	1.44986e-08	5	MRPS26
4.22139e-13	0.315427	0.269	0.53	1.48677e-08	5	NDUFA7
4.25199e-13	0.307178	0.106	0.255	1.49755e-08	5	LAP3
4.28413e-13	0.257757	0.142	0.314	1.50887e-08	5	RPS6KA1
4.32818e-13	0.504813	0.217	0.443	1.52439e-08	5	PSMA6
4.51313e-13	0.345729	0.428	0.809	1.58952e-08	5	WDR83OS
4.69165e-13	0.957334	0.643	0.875	1.6524e-08	5	ARPC3
4.8262e-13	0.588351	0.308	0.612	1.69979e-08	5	HNRNPR
5.19006e-13	0.445695	0.375	0.737	1.82794e-08	5	MSN
5.42411e-13	0.490634	0.156	0.341	1.91037e-08	5	WDR1
5.80103e-13	0.381427	0.364	0.706	2.04312e-08	5	NME3
6.01615e-13	0.263635	0.155	0.338	2.11889e-08	5	LAMTOR1
6.45718e-13	0.261945	0.11	0.261	2.27422e-08	5	USP1
6.61832e-13	0.560249	0.238	0.482	2.33097e-08	5	PSMA1
6.91431e-13	0.253152	0.905	0.988	2.43522e-08	5	RPL7A
7.1616e-13	0.281286	0.367	0.698	2.52231e-08	5	NDUFC1
7.40634e-13	0.309096	0.435	0.816	2.60851e-08	5	CAPZB
7.58463e-13	0.355917	0.184	0.385	2.67131e-08	5	TMEM230
8.95096e-13	0.355533	0.185	0.387	3.15253e-08	5	POLR2F
9.01921e-13	0.252621	0.127	0.287	3.17657e-08	5	ZCRB1
9.97239e-13	0.284375	0.224	0.45	3.51228e-08	5	RHOG
1.18027e-12	0.421672	0.225	0.451	4.15691e-08	5	HDAC1
1.23476e-12	0.283068	0.156	0.336	4.34883e-08	5	CKLF
1.23929e-12	0.330338	0.135	0.301	4.36479e-08	5	CARD16
1.40819e-12	0.261541	0.105	0.251	4.95965e-08	5	RPA2
1.41313e-12	0.353591	0.121	0.277	4.97704e-08	5	RNF7
1.50416e-12	0.278497	0.108	0.256	5.29767e-08	5	NDUFA8
1.52265e-12	0.450945	0.213	0.428	5.36276e-08	5	ENSA
1.70644e-12	0.26578	0.142	0.309	6.01009e-08	5	EEF1AKMT2
1.83426e-12	0.420246	0.264	0.521	6.46027e-08	5	ATG12
2.10082e-12	0.309248	0.147	0.318	7.39908e-08	5	NT5C
2.13392e-12	0.371727	0.345	0.66	7.51566e-08	5	BLOC1S1
2.15432e-12	0.412113	0.18	0.377	7.58751e-08	5	DSTN
2.17318e-12	0.461144	0.261	0.517	7.65395e-08	5	MYDGF
2.33604e-12	0.306632	0.153	0.33	8.22753e-08	5	PPIH
2.35447e-12	0.318904	0.164	0.349	8.29245e-08	5	EIF6
2.39636e-12	0.357509	0.232	0.46	8.43999e-08	5	DNAJA1
2.55767e-12	0.254006	0.312	0.571	9.00812e-08	5	LOC719250
2.7756e-12	0.409246	0.396	0.753	9.77568e-08	5	YBX1
2.88938e-12	0.325246	0.38	0.72	1.01764e-07	5	LOC720636
2.9056e-12	0.363648	0.293	0.567	1.02335e-07	5	MFNG
3.05866e-12	0.314566	0.164	0.348	1.07726e-07	5	RNF5
3.45808e-12	0.453057	0.25	0.488	1.21793e-07	5	C15H9orf16
3.59052e-12	0.270412	0.327	0.631	1.26458e-07	5	HMGN1
3.72801e-12	0.40047	0.177	0.367	1.31301e-07	5	PPP1R18
3.86804e-12	0.369432	0.37	0.703	1.36232e-07	5	ATP5PF
4.05314e-12	0.483125	0.224	0.447	1.42752e-07	5	PPM1G
4.57104e-12	0.364773	0.153	0.329	1.60992e-07	5	NDUFA5
4.75284e-12	0.32028	0.13	0.29	1.67395e-07	5	DIABLO
4.87256e-12	0.390464	0.156	0.332	1.71612e-07	5	DAZAP1
4.98364e-12	0.525354	0.32	0.614	1.75524e-07	5	CACYBP
5.2829e-12	0.454745	0.214	0.422	1.86064e-07	5	LOC707555
5.71558e-12	0.336452	0.119	0.271	2.01303e-07	5	MRPS18C
5.7325e-12	0.288724	0.161	0.337	2.01899e-07	5	EIF4E2
6.06325e-12	0.547558	0.304	0.588	2.13548e-07	5	BZW1
6.13335e-12	0.331411	0.23	0.456	2.16017e-07	5	CFAP299
6.36357e-12	0.310322	0.272	0.522	2.24125e-07	5	ZNHIT1
6.49065e-12	0.437383	0.151	0.322	2.28601e-07	5	RBBP7
6.52523e-12	0.26192	0.419	0.792	2.29819e-07	5	TMA7
6.55422e-12	0.741135	0.235	0.468	2.30839e-07	5	NASP
6.74815e-12	0.408783	0.206	0.416	2.3767e-07	5	SLC25A4
7.06777e-12	0.25689	0.111	0.253	2.48927e-07	5	LOC694538
7.97755e-12	0.476977	0.216	0.432	2.80969e-07	5	STUB1
8.03086e-12	0.34414	0.361	0.693	2.82847e-07	5	RPS4Y2
8.32159e-12	0.290867	0.127	0.283	2.93086e-07	5	VDAC1
8.36088e-12	0.440206	0.378	0.729	2.9447e-07	5	C5H4orf3
8.93409e-12	0.781468	0.676	0.794	3.14659e-07	5	S100A10
9.54466e-12	0.357403	0.942	0.999	3.36163e-07	5	KEG06-p07
9.58383e-12	0.390057	0.227	0.452	3.37543e-07	5	CSTB
1.01556e-11	0.524091	0.271	0.527	3.57681e-07	5	SRSF9
1.02617e-11	0.597465	0.33	0.648	3.61419e-07	5	DEK
1.0728e-11	1.68541	0.327	0.274	3.77841e-07	5	IFI27
1.11366e-11	1.13196	0.623	0.841	3.92232e-07	5	PSMA7
1.19768e-11	0.255541	0.113	0.257	4.21822e-07	5	KLHDC3
1.2178e-11	0.482649	0.195	0.394	4.28908e-07	5	MAZ
1.22963e-11	0.494556	0.201	0.407	4.33074e-07	5	NDUFA12
1.27164e-11	0.354058	0.11	0.252	4.47871e-07	5	MRPS18A
1.30275e-11	0.425656	0.19	0.384	4.58828e-07	5	PSMB4
1.43821e-11	0.417097	0.164	0.341	5.06537e-07	5	RILPL2
1.45252e-11	0.358302	0.428	0.802	5.11576e-07	5	SLC25A3
1.47233e-11	0.263001	0.137	0.296	5.18555e-07	5	CFAP36
1.55097e-11	0.437324	0.188	0.382	5.46251e-07	5	PSTPIP1
1.56718e-11	0.285692	0.161	0.336	5.51962e-07	5	NME4
1.63273e-11	0.552533	0.285	0.557	5.75049e-07	5	ERH
1.94743e-11	0.428749	0.147	0.31	6.85886e-07	5	RTF2
2.0114e-11	0.283497	0.113	0.256	7.08416e-07	5	MRPL32
2.09446e-11	0.367375	0.155	0.326	7.37669e-07	5	AKR1A1
2.17661e-11	0.348636	0.868	0.988	7.66602e-07	5	CD52
2.40001e-11	0.371132	0.158	0.327	8.45285e-07	5	TXNL1
2.50223e-11	1.43933	0.538	0.666	8.81286e-07	5	SNRPB
2.58667e-11	0.390229	0.388	0.724	9.11025e-07	5	GABARAP
2.61524e-11	0.530949	0.172	0.353	9.21087e-07	5	SPCS3
2.62121e-11	0.324135	0.132	0.285	9.23191e-07	5	PNKD
2.79761e-11	0.353261	0.159	0.331	9.8532e-07	5	PFDN6
2.86558e-11	0.276068	0.169	0.343	1.00926e-06	5	MPST
2.87371e-11	0.416687	0.213	0.414	1.01212e-06	5	ICAM3
2.90118e-11	0.424951	0.138	0.292	1.02179e-06	5	ATP1A1
2.91643e-11	0.336172	0.312	0.594	1.02717e-06	5	ATP5PD
2.95091e-11	0.519756	0.211	0.42	1.03931e-06	5	MRPL34
3.07789e-11	0.473009	0.348	0.661	1.08403e-06	5	NDUFB2
3.20477e-11	0.300918	0.116	0.26	1.12872e-06	5	EEF1E1
3.31143e-11	0.448691	0.308	0.593	1.16629e-06	5	TMEM219
3.33726e-11	0.467218	0.229	0.45	1.17538e-06	5	CCT7
3.59532e-11	0.284382	0.201	0.402	1.26627e-06	5	HYPK
3.94996e-11	0.496211	0.224	0.443	1.39118e-06	5	UFC1
4.03631e-11	0.467872	0.309	0.587	1.42159e-06	5	SNU13
4.09275e-11	0.370391	0.116	0.259	1.44147e-06	5	C16H17orf49
4.15022e-11	0.450569	0.113	0.253	1.46171e-06	5	LMAN1
4.16259e-11	0.365306	0.198	0.391	1.46606e-06	5	ANP32A
4.53886e-11	0.288876	0.145	0.303	1.59859e-06	5	POLR2D
4.80653e-11	0.423866	0.232	0.445	1.69286e-06	5	ATP5F1B
4.83991e-11	0.256327	0.114	0.254	1.70462e-06	5	SDF2
5.55958e-11	0.46754	0.176	0.359	1.95808e-06	5	LSM5
5.70304e-11	0.357686	0.235	0.445	2.00861e-06	5	IER2
6.31081e-11	0.522991	0.385	0.719	2.22267e-06	5	CALM2
6.42286e-11	0.567592	0.343	0.66	2.26213e-06	5	SRSF2
6.74304e-11	0.514023	0.279	0.532	2.3749e-06	5	SRP9
6.88951e-11	0.373514	0.329	0.627	2.42649e-06	5	SEC61G
7.14822e-11	0.423505	0.357	0.679	2.5176e-06	5	RBX1
7.27608e-11	0.368404	0.346	0.642	2.56263e-06	5	FIS1
7.6145e-11	0.349024	0.116	0.257	2.68183e-06	5	TXN2
7.92937e-11	0.28751	0.461	0.845	2.79273e-06	5	ABRACL
7.96269e-11	0.387572	0.196	0.383	2.80446e-06	5	FERMT3
8.25381e-11	0.420101	0.238	0.458	2.90699e-06	5	PSMC5
8.46633e-11	0.267383	0.124	0.267	2.98184e-06	5	HMGN2
9.71686e-11	0.429459	0.145	0.304	3.42228e-06	5	MRPL13
1.06042e-10	0.374678	0.377	0.687	3.73481e-06	5	PLAAT4
1.06284e-10	1.1384	0.596	0.783	3.74334e-06	5	PSMB8
1.06375e-10	0.348922	0.135	0.284	3.74651e-06	5	NDUFA9
1.13218e-10	0.424381	0.159	0.32	3.98753e-06	5	CCDC12
1.1416e-10	0.40442	0.198	0.392	4.02071e-06	5	UBE2L3
1.18874e-10	0.369876	0.171	0.34	4.18673e-06	5	PIH1D1
1.25309e-10	0.362256	0.171	0.343	4.41339e-06	5	C19H19orf24
1.26489e-10	0.413164	0.324	0.61	4.45496e-06	5	CCT3
1.48866e-10	0.545173	0.264	0.498	5.24306e-06	5	CD63
1.57533e-10	0.464968	0.262	0.488	5.5483e-06	5	ITGB2
1.61746e-10	0.29126	0.156	0.317	5.6967e-06	5	RAB11A
1.7416e-10	0.357761	0.14	0.292	6.13392e-06	5	COX20
1.80528e-10	0.264462	0.13	0.276	6.35819e-06	5	SOD2
1.85497e-10	0.327676	0.119	0.258	6.53322e-06	5	DBNL
2.06987e-10	0.394605	0.203	0.397	7.2901e-06	5	CDC26
2.12528e-10	0.46092	0.287	0.542	7.48524e-06	5	LSM6
2.18333e-10	0.288966	0.188	0.365	7.68968e-06	5	COX17
2.29025e-10	0.435658	0.214	0.419	8.06625e-06	5	NDUFAB1
2.34801e-10	0.456441	0.148	0.301	8.26969e-06	5	PPP1R14B
2.41323e-10	0.340139	0.142	0.292	8.4994e-06	5	MRPL38
2.44227e-10	0.446087	0.163	0.326	8.60168e-06	5	CNIH4
2.44839e-10	0.672652	0.723	0.945	8.62324e-06	5	HSPA8
2.46989e-10	0.43773	0.316	0.594	8.69897e-06	5	PRDX5
2.73842e-10	0.343301	0.232	0.44	9.64471e-06	5	LOC114678430
2.98123e-10	0.484534	0.24	0.459	1.04999e-05	5	PRDX6
3.03131e-10	0.486177	0.227	0.443	1.06763e-05	5	SCAND1
3.04066e-10	0.395227	0.187	0.364	1.07092e-05	5	SSBP1
3.08597e-10	0.282038	0.121	0.261	1.08688e-05	5	LRPAP1
3.09792e-10	0.373097	0.2	0.389	1.09109e-05	5	LSM8
3.39221e-10	0.559799	0.311	0.586	1.19474e-05	5	CBX3
3.46821e-10	0.474644	0.251	0.481	1.2215e-05	5	ATP5PB
3.91933e-10	1.42136	0.525	0.639	1.38039e-05	5	SLC25A5
4.18457e-10	0.451366	0.163	0.331	1.47381e-05	5	TUFM
4.66114e-10	0.669845	0.2	0.388	1.64165e-05	5	MTPN
4.70264e-10	0.627738	0.233	0.449	1.65627e-05	5	PSMA3
5.30821e-10	0.420018	0.2	0.381	1.86955e-05	5	POLE4
5.47062e-10	0.449664	0.185	0.362	1.92675e-05	5	NDUFS2
5.74728e-10	0.855131	0.25	0.478	2.02419e-05	5	HSP90B1
5.92345e-10	0.295289	0.151	0.307	2.08624e-05	5	SH3BP1
6.42027e-10	0.419281	0.184	0.359	2.26122e-05	5	CCNQ
6.56107e-10	0.393055	0.188	0.367	2.31081e-05	5	TMEM14C
6.86094e-10	0.505509	0.182	0.36	2.41642e-05	5	MRPS15
7.71735e-10	0.381111	0.155	0.313	2.71805e-05	5	POLR2H
8.24325e-10	0.266373	0.147	0.295	2.90327e-05	5	MRPL33
8.29073e-10	0.375	0.222	0.418	2.92e-05	5	HSPD1
8.33062e-10	0.263077	0.184	0.345	2.93405e-05	5	DUSP1
8.50627e-10	0.479687	0.214	0.407	2.99591e-05	5	EIF4A3
8.9226e-10	0.407362	0.184	0.356	3.14254e-05	5	HAX1
8.97968e-10	0.573566	0.28	0.523	3.16264e-05	5	PA2G4
9.00067e-10	0.459905	0.196	0.383	3.17003e-05	5	HIKESHI
9.85318e-10	0.595321	0.245	0.461	3.47029e-05	5	RAC1
1.0365e-09	0.368034	0.309	0.569	3.65055e-05	5	CUTA
1.10175e-09	0.553957	0.272	0.513	3.88038e-05	5	SNRPE
1.1701e-09	0.581542	0.248	0.465	4.12109e-05	5	DDX39A
1.26093e-09	0.443566	0.135	0.282	4.44098e-05	5	EMC7
1.28607e-09	0.288828	0.122	0.254	4.52953e-05	5	PAXX
1.29701e-09	0.459733	0.176	0.342	4.56805e-05	5	ANAPC11
1.36706e-09	0.281521	0.449	0.822	4.81478e-05	5	UQCR
1.43908e-09	0.364176	0.121	0.252	5.06843e-05	5	NMI
1.46132e-09	0.457625	0.343	0.624	5.14676e-05	5	SPCS1
1.52225e-09	0.473472	0.362	0.675	5.36138e-05	5	DYNLRB1
1.60227e-09	0.37643	0.126	0.26	5.6432e-05	5	VBP1
1.62287e-09	0.454704	0.285	0.532	5.71574e-05	5	TLR9
1.7105e-09	0.557456	0.271	0.496	6.02439e-05	5	GLIPR1
1.87331e-09	0.439971	0.224	0.424	6.59781e-05	5	TKT
1.97736e-09	0.388639	0.171	0.329	6.96426e-05	5	MXD4
2.00303e-09	0.642895	0.2	0.385	7.05468e-05	5	SMIM7
2.08223e-09	0.383055	0.121	0.251	7.33361e-05	5	HDGF
2.14735e-09	0.491727	0.206	0.398	7.56298e-05	5	TRAPPC4
2.46167e-09	0.322435	0.174	0.328	8.67001e-05	5	MYO1F
2.46551e-09	0.509034	0.304	0.567	8.68352e-05	5	DAD1
2.59257e-09	0.2716	0.142	0.282	9.13103e-05	5	CDKN2D
2.8215e-09	0.603599	0.282	0.533	9.93733e-05	5	ARPC4
2.8636e-09	0.458267	0.166	0.318	0.000100856	5	TENT5C
3.0171e-09	0.750717	0.225	0.429	0.000106262	5	TMPO
3.15282e-09	0.731309	0.246	0.461	0.000111042	5	HSPA5
3.72376e-09	0.434119	0.176	0.339	0.000131151	5	PSMG2
3.80449e-09	0.595219	0.245	0.461	0.000133994	5	C1QBP
3.94198e-09	0.379818	0.454	0.83	0.000138836	5	UBL5
4.2279e-09	0.40538	0.203	0.382	0.000148907	5	IER3IP1
4.31143e-09	0.358188	0.145	0.287	0.000151848	5	PSENEN
4.77006e-09	0.366533	0.145	0.287	0.000168001	5	CLTB
4.83548e-09	0.480541	0.295	0.535	0.000170306	5	CIB1
5.22487e-09	0.502965	0.433	0.799	0.00018402	5	PPIB
5.29831e-09	0.552816	0.206	0.391	0.000186606	5	RPN2
5.31332e-09	0.545424	0.325	0.602	0.000187135	5	ARF1
6.05448e-09	0.472953	0.345	0.632	0.000213239	5	NOP10
6.16587e-09	0.351536	0.18	0.342	0.000217162	5	RNPEPL1
6.22343e-09	0.735511	0.271	0.493	0.000219189	5	CLEC2B
6.89529e-09	0.574554	0.176	0.337	0.000242852	5	BID
7.03557e-09	0.465287	0.155	0.296	0.000247793	5	APOL2
7.34788e-09	0.388764	0.13	0.261	0.000258792	5	HNRNPUL2
8.56947e-09	1.22295	0.472	0.525	0.000301817	5	LY6E-1
1.01503e-08	0.617264	0.211	0.394	0.000357492	5	LSM3
1.03386e-08	0.358585	0.135	0.268	0.000364125	5	UBE2M
1.03697e-08	0.401627	0.137	0.271	0.000365221	5	C5H4orf27
1.13098e-08	0.496	0.237	0.438	0.000398331	5	ARL6IP4
1.28728e-08	0.586296	0.188	0.358	0.000453381	5	GUK1
1.35998e-08	0.349377	0.15	0.289	0.000478986	5	CHCHD10
1.37152e-08	0.296419	0.13	0.259	0.00048305	5	PFKL
1.45106e-08	0.314555	0.14	0.276	0.000511064	5	DDRGK1
1.52512e-08	0.339063	0.198	0.356	0.000537146	5	PLP2
1.53487e-08	0.488883	0.18	0.338	0.00054058	5	CTSA
1.5367e-08	0.515244	0.19	0.361	0.000541226	5	PTPMT1
1.64169e-08	0.565271	0.248	0.452	0.000578202	5	RER1
1.69358e-08	0.370124	0.148	0.286	0.000596479	5	NAA38
1.77353e-08	0.56375	0.151	0.295	0.000624636	5	NDUFV1
2.04214e-08	0.590021	0.238	0.438	0.000719243	5	ARF6
2.22125e-08	0.552672	0.404	0.729	0.000782323	5	SRSF3
2.26371e-08	0.526641	0.411	0.756	0.000797279	5	ATP5F1A
2.27641e-08	0.349533	0.164	0.31	0.000801751	5	RPN1
2.36728e-08	0.27579	0.129	0.258	0.000833757	5	PSMC1
2.37072e-08	0.406011	0.185	0.342	0.000834968	5	LOC716637
3.40414e-08	0.486192	0.192	0.356	0.00119894	5	WASHC3
3.47207e-08	0.483906	0.196	0.368	0.00122286	5	TMED9
3.66382e-08	0.643938	0.15	0.287	0.0012904	5	CMC2
3.76979e-08	0.659851	0.201	0.371	0.00132772	5	HNRNPAB
3.9254e-08	0.340674	0.158	0.296	0.00138253	5	DCTN2
4.19519e-08	0.605572	0.274	0.498	0.00147755	5	EIF3I
4.24781e-08	0.52181	0.174	0.327	0.00149608	5	PLGRKT
4.37932e-08	1.1328	0.657	0.906	0.00154239	5	HSP90AA1
4.48807e-08	0.443151	0.13	0.256	0.0015807	5	AP1S1
4.55191e-08	0.487559	0.221	0.402	0.00160318	5	ATP5MC1
4.58736e-08	0.271706	0.443	0.74	0.00161567	5	S100A11
4.85853e-08	0.513481	0.245	0.444	0.00171117	5	MRPL20
4.89766e-08	0.566678	0.132	0.259	0.00172496	5	TIMM17A
5.53467e-08	0.53607	0.692	0.947	0.00194931	5	HINT1
5.7443e-08	0.729408	0.274	0.501	0.00202314	5	PSMA5
5.842e-08	0.378346	0.403	0.712	0.00205755	5	RPL22L1
5.88417e-08	0.433632	0.171	0.32	0.0020724	5	RAB5C
5.96045e-08	0.48991	0.156	0.295	0.00209927	5	TRAPPC1
5.97041e-08	0.327762	0.138	0.267	0.00210278	5	FAM32A
7.16656e-08	0.526294	0.401	0.716	0.00252406	5	LSP1
7.20514e-08	0.495411	0.366	0.665	0.00253765	5	NDUFA11
8.07708e-08	0.426544	0.135	0.258	0.00284475	5	PPA1
8.92702e-08	0.427727	0.227	0.406	0.0031441	5	PPDPF
9.13045e-08	0.506271	0.158	0.296	0.00321575	5	LAMTOR2
9.63208e-08	0.579171	0.219	0.399	0.00339242	5	CARHSP1
9.74155e-08	0.518046	0.192	0.355	0.00343097	5	CCDC85B
9.91995e-08	0.300278	0.147	0.278	0.00349381	5	CCDC56
1.09218e-07	0.935076	0.593	0.789	0.00384665	5	GPX4
1.19336e-07	0.619909	0.193	0.36	0.00420302	5	MRPS12
1.19381e-07	0.564852	0.205	0.369	0.0042046	5	UQCC3
1.19966e-07	0.52403	0.219	0.397	0.00422521	5	PSMD4
1.22338e-07	0.529344	0.137	0.26	0.00430876	5	SASH3
1.22474e-07	0.318893	0.13	0.252	0.00431353	5	MRPL17
1.24697e-07	0.47409	0.378	0.657	0.00439184	5	H1FX
1.26667e-07	0.496232	0.19	0.347	0.00446121	5	AURKAIP1
1.29884e-07	0.308647	0.25	0.431	0.00457451	5	LOC106997893
1.33516e-07	0.347305	0.132	0.253	0.00470242	5	MRPL52
1.35638e-07	0.534002	0.24	0.413	0.00477718	5	DNAJC1
1.44177e-07	0.503333	0.14	0.262	0.00507793	5	SERPINB9
1.46445e-07	0.405873	0.174	0.319	0.00515779	5	GSDMD
1.48973e-07	0.606315	0.171	0.317	0.00524684	5	ADRM1
1.49634e-07	0.366179	0.174	0.31	0.0052701	5	TNFRSF1B
1.84434e-07	0.646003	0.161	0.297	0.00649577	5	C11H12orf45
1.97444e-07	0.415829	0.185	0.337	0.00695397	5	PRMT1
2.15547e-07	0.556562	0.132	0.252	0.00759156	5	NDUFAF3
2.21141e-07	0.401393	0.151	0.281	0.00778859	5	HINT2
2.2807e-07	0.628725	0.158	0.289	0.00803261	5	ARHGAP26
2.37125e-07	0.625291	0.258	0.467	0.00835156	5	ATP5F1C
2.39524e-07	0.488087	0.182	0.331	0.00843602	5	MRPS25
2.57787e-07	0.654732	0.287	0.516	0.00907926	5	NUDC
2.58149e-07	0.594854	0.258	0.459	0.00909201	5	TAF10
2.59468e-07	0.540143	0.225	0.399	0.00913846	5	ZNRD1
2.63587e-07	0.326453	0.155	0.286	0.00928355	5	LOC100427190
2.71752e-07	0.421996	0.224	0.398	0.00957109	5	EXOSC6
2.98711e-07	0.427766	0.134	0.252	0.0105206	5	PAGR1
3.1105e-07	0.516207	0.151	0.28	0.0109552	5	SUPT4H1
3.14187e-07	0.388228	0.14	0.262	0.0110657	5	CHCHD1
3.6127e-07	0.549992	0.388	0.702	0.0127239	5	EDF1
4.17974e-07	0.615762	0.308	0.551	0.014721	5	NDUFB11
4.6263e-07	0.651486	0.291	0.516	0.0162938	5	CCT5
4.66254e-07	0.521456	0.282	0.497	0.0164215	5	COX14
4.66521e-07	0.631193	0.285	0.515	0.0164309	5	NDUFB7
5.13889e-07	0.57519	0.395	0.708	0.0180992	5	PCBP1
5.84871e-07	0.801101	0.641	0.872	0.0205992	5	RAC2
5.91239e-07	0.481696	0.366	0.636	0.0208234	5	GLIPR2
6.42459e-07	0.499877	0.177	0.318	0.0226274	5	PLEKHJ1
6.84699e-07	0.6943	0.195	0.35	0.0241151	5	PHF5A
7.38158e-07	0.308866	0.52	0.879	0.0259979	5	IFI27L2
8.08085e-07	0.52286	0.401	0.708	0.0284608	5	GNAI2
8.18719e-07	0.630141	0.2	0.358	0.0288353	5	ELOC
9.21735e-07	0.570394	0.274	0.476	0.0324635	5	BST2
9.5624e-07	0.616056	0.205	0.358	0.0336788	5	MAPRE1
9.66771e-07	0.270122	0.176	0.302	0.0340497	5	MT2A
9.71801e-07	0.638746	0.233	0.414	0.0342268	5	MRPL11
9.73745e-07	0.668539	0.184	0.329	0.0342953	5	SEC11C
1.02915e-06	0.556642	0.213	0.376	0.0362466	5	PDAP1
1.1224e-06	0.527708	0.246	0.424	0.039531	5	VAMP5
1.17543e-06	0.386363	0.704	0.977	0.0413987	5	CD3D
1.39249e-06	0.50462	0.208	0.352	0.0490436	5	SSBP4
1.4152e-06	0.585879	0.151	0.276	0.0498434	5	MRPL47

## Sheet: Cluster 6
p_val	avg_log2FC	pct.1	pct.2	p_val_adj	cluster	gene
4.61442e-146	1.70357	0.991	0.995	1.6252e-141	6	ADORA2B
3.20396e-123	1.53093	0.991	0.962	1.12843e-118	6	FOXP1
9.28963e-123	1.21364	0.988	0.989	3.27181e-118	6	RIPOR2
2.03274e-122	1.52357	0.994	0.992	7.15931e-118	6	LOC114673461
3.32963e-119	1.13176	0.991	0.988	1.1727e-114	6	ARHGAP15
4.12662e-118	1.48778	0.985	0.979	1.4534e-113	6	KEG06-p13
9.22765e-103	1.39921	0.972	0.982	3.24998e-98	6	KEG06-p11
3.70376e-102	1.07943	0.985	0.992	1.30446e-97	6	MBNL1
8.40336e-102	1.55826	0.92	0.803	2.95966e-97	6	DIP2B
1.73797e-100	1.23841	0.994	0.998	6.12113e-96	6	KEG06-p07
1.27201e-97	1.36301	0.947	0.908	4.48002e-93	6	ARID1B
9.17247e-96	1.52245	0.972	0.944	3.23055e-91	6	CCND3
4.78778e-92	1.49876	0.947	0.785	1.68626e-87	6	LEF1
1.07973e-90	1.22778	0.963	0.956	3.8028e-86	6	BCL11B
2.4019e-90	1.12921	0.997	1	8.45948e-86	6	KEG06-r01
2.30907e-89	1.48573	0.972	0.959	8.13253e-85	6	KEG06-p08
5.19768e-87	1.19108	0.941	0.946	1.83062e-82	6	TNRC6B
4.08069e-86	1.38237	0.947	0.93	1.43722e-81	6	SSH2
1.8111e-85	1.19155	0.96	0.955	6.37869e-81	6	TNIK
1.88313e-83	1.08768	0.972	0.97	6.63238e-79	6	ANKRD44
3.38424e-82	1.19248	0.92	0.922	1.19193e-77	6	UTRN
1.3284e-81	1.15434	0.969	0.963	4.67862e-77	6	CAMK4
2.29735e-81	1.09524	0.966	0.976	8.09127e-77	6	IKZF1
2.38279e-80	1.19981	1	0.999	8.39218e-76	6	LOC114673210
5.05301e-80	1.38096	0.92	0.86	1.77967e-75	6	ATP10A
6.91926e-80	1.27037	0.935	0.871	2.43696e-75	6	DOCK10
3.12216e-79	1.15265	0.981	0.968	1.09963e-74	6	PITPNC1
3.46093e-79	1.55974	0.923	0.806	1.21894e-74	6	MAML2
2.98072e-78	1.22657	0.907	0.862	1.04981e-73	6	ASH1L
1.49014e-77	1.29045	0.91	0.907	5.24827e-73	6	EPB41
2.3398e-77	1.29067	0.901	0.842	8.24077e-73	6	RUNX1
1.46502e-73	1.32865	0.997	0.998	5.15979e-69	6	KEG06-p10
2.80475e-73	1.28536	0.892	0.793	9.87834e-69	6	PAG1
4.34931e-72	1.20858	0.944	0.901	1.53183e-67	6	FOXN3
5.30463e-72	1.36435	0.885	0.77	1.86829e-67	6	AKT3
1.29046e-70	1.1196	0.932	0.93	4.54502e-66	6	CELF2
2.24173e-69	1.13993	0.926	0.87	7.89537e-65	6	ZC3HAV1
1.22853e-68	1.2307	0.92	0.913	4.32689e-64	6	CD247
1.57808e-66	1.08752	0.975	0.96	5.55799e-62	6	KEG06-p12
2.14897e-63	1.4164	0.87	0.716	7.56869e-59	6	BACH2
3.40469e-63	1.08462	0.91	0.881	1.19913e-58	6	NCOA3
1.47832e-62	0.970121	0.966	0.978	5.20666e-58	6	SKAP1
3.36325e-62	1.10427	0.932	0.918	1.18454e-57	6	CYTH1
9.11553e-62	1.09475	0.907	0.875	3.21049e-57	6	STAG1
4.78629e-61	1.24615	0.876	0.845	1.68573e-56	6	ELMO1
1.46455e-60	0.899429	0.957	0.967	5.15816e-56	6	LOC707383
1.97279e-60	1.10866	0.87	0.788	6.94817e-56	6	GLG1
3.2417e-60	1.39141	0.87	0.783	1.14173e-55	6	ARHGEF18
3.09554e-59	1.25284	0.932	0.88	1.09025e-54	6	PCED1B
1.02604e-58	1.07389	0.885	0.874	3.61373e-54	6	ANKRD11
2.05175e-58	0.971138	0.901	0.917	7.22625e-54	6	VPS13B
2.3383e-58	1.04414	0.861	0.849	8.2355e-54	6	BIRC6
5.21118e-58	1.26548	0.87	0.792	1.83538e-53	6	ZNF609
5.71596e-58	1.42233	0.842	0.726	2.01316e-53	6	AFF1
7.15303e-55	1.06085	0.907	0.923	2.5193e-50	6	TBC1D5
8.83384e-54	1.35903	0.811	0.688	3.11128e-49	6	FOXO1
2.03055e-53	1.07009	0.836	0.813	7.15159e-49	6	KANSL1
3.4213e-53	1.36163	0.777	0.617	1.20498e-48	6	CERS6
3.57982e-53	1.5762	0.839	0.801	1.26081e-48	6	XYLT1
3.34718e-52	1.12785	0.854	0.837	1.17888e-47	6	RAPGEF6
1.93969e-51	1.21206	0.836	0.778	6.83159e-47	6	PACS1
4.40197e-51	1.03083	0.848	0.813	1.55037e-46	6	KMT2C
6.00914e-51	1.07118	0.827	0.813	2.11642e-46	6	UTY
9.33641e-51	1.00229	0.932	0.938	3.28828e-46	6	LOC708686
1.9221e-50	1.27732	0.824	0.695	6.76964e-46	6	PDK1
4.6458e-50	1.63368	0.663	0.432	1.63625e-45	6	LOC114678430
5.14411e-50	1.11058	0.861	0.848	1.81175e-45	6	MED13L
9.10014e-49	0.968587	0.882	0.89	3.20507e-44	6	AAK1
1.11653e-48	0.959647	0.873	0.865	3.9324e-44	6	PRKCQ
2.02011e-46	1.0275	0.839	0.843	7.11481e-42	6	ESYT2
1.11697e-45	1.55877	0.802	0.702	3.93398e-41	6	MSI2
1.69571e-45	1.09827	0.814	0.741	5.97229e-41	6	TMEM131L
1.79979e-45	1.25798	0.805	0.673	6.33884e-41	6	SIPA1L1
3.80878e-45	1.24066	0.789	0.681	1.34145e-40	6	ST6GAL1
2.30107e-44	1.03468	0.923	0.919	8.10435e-40	6	KLF12
2.68072e-44	1.03816	0.811	0.795	9.44148e-40	6	UBAC2
1.10261e-43	1.23639	0.836	0.817	3.88341e-39	6	CAMK2D
1.91092e-43	1.05736	0.842	0.806	6.73028e-39	6	ZFAND3
3.91288e-43	1.15367	0.718	0.58	1.37812e-38	6	FARS2
3.17179e-42	0.931049	0.839	0.862	1.11711e-37	6	SCAPER
4.46628e-42	1.45911	0.7	0.519	1.57302e-37	6	AFF3
6.49987e-42	1.13716	0.765	0.707	2.28925e-37	6	PUM1
4.77351e-41	0.913076	0.82	0.838	1.68123e-36	6	USP34
7.66579e-41	1.10715	0.839	0.781	2.69989e-36	6	SSBP2
1.1316e-40	0.799125	0.938	0.952	3.9855e-36	6	FNBP1
1.27186e-40	1.17662	0.789	0.75	4.47949e-36	6	RERE
1.36257e-40	1.07875	0.83	0.731	4.79897e-36	6	SATB1
1.4817e-40	1.26741	0.709	0.583	5.21854e-36	6	FBXL20
3.58203e-40	0.928292	0.836	0.853	1.26159e-35	6	DOCK8
5.59744e-40	1.1924	0.789	0.757	1.97142e-35	6	HIVEP2
1.60346e-39	0.870809	0.873	0.896	5.64738e-35	6	PRKCH
2.91963e-39	1.03762	0.92	0.923	1.02829e-34	6	BMT2
3.78742e-39	0.977005	0.796	0.733	1.33393e-34	6	DYRK1A
4.57628e-39	1.04166	0.802	0.776	1.61176e-34	6	ADD3
4.94879e-39	1.08108	0.759	0.692	1.74297e-34	6	ITPR2
1.22843e-38	1.00231	0.762	0.678	4.32655e-34	6	LOC712543
2.69184e-38	1.35937	0.697	0.523	9.48067e-34	6	RASGRF2
1.4844e-37	1.26041	0.814	0.77	5.22804e-33	6	MLLT3
1.96977e-37	0.945902	0.827	0.852	6.93752e-33	6	PIP4K2A
2.36682e-37	0.996258	0.842	0.836	8.33593e-33	6	CDC14A
2.46567e-37	0.910325	0.833	0.878	8.68408e-33	6	SMCHD1
2.59427e-37	0.940572	0.805	0.764	9.13701e-33	6	CELF1
2.75834e-37	1.0444	0.799	0.785	9.71489e-33	6	PRKCB
2.94823e-37	0.838949	0.799	0.836	1.03837e-32	6	DDX17
3.96865e-37	0.789391	0.92	0.961	1.39776e-32	6	CDC42SE2
6.4865e-37	0.996783	0.864	0.862	2.28455e-32	6	JMJD1C
7.22376e-37	1.23555	0.703	0.588	2.54421e-32	6	AOPEP
1.35501e-36	1.02599	0.808	0.82	4.77235e-32	6	TCF12
1.77821e-36	0.850387	0.882	0.895	6.26287e-32	6	STK4
2.48849e-36	0.957792	0.777	0.698	8.76445e-32	6	CCDC91
2.55391e-36	0.921554	0.833	0.857	8.99487e-32	6	LRBA
3.09743e-36	0.978981	0.833	0.734	1.09091e-31	6	PECAM1
7.01731e-36	1.0112	0.759	0.711	2.4715e-31	6	KDM4C
1.03158e-35	0.810914	0.87	0.911	3.63321e-31	6	JAK1
1.63962e-35	0.962499	0.796	0.822	5.77475e-31	6	MPZL1
1.89365e-35	0.912933	0.848	0.869	6.66942e-31	6	FYN
3.0501e-35	1.06741	0.765	0.666	1.07425e-30	6	TXK
3.10875e-35	1.0093	0.762	0.726	1.0949e-30	6	MAP4K4
3.7147e-35	1.03992	0.836	0.856	1.30832e-30	6	SCML4
5.47911e-35	1.01609	0.731	0.705	1.92974e-30	6	CREBBP
9.86856e-35	1.01131	0.78	0.773	3.47571e-30	6	CDKAL1
1.05901e-34	0.900104	0.814	0.768	3.72983e-30	6	TLK1
1.35257e-34	0.829172	0.836	0.849	4.76375e-30	6	NIPBL
1.47646e-34	0.952315	0.793	0.762	5.2001e-30	6	EXOC4
1.55966e-34	1.1405	0.743	0.696	5.49311e-30	6	CAMK1D
2.56576e-34	0.921521	0.805	0.823	9.0366e-30	6	FAM172A
2.57929e-34	0.991162	0.749	0.691	9.08424e-30	6	SETD2
3.0481e-34	1.10478	0.734	0.681	1.07354e-29	6	TRERF1
4.63597e-34	1.32688	0.672	0.576	1.63279e-29	6	SNX29
5.17497e-34	1.26725	0.762	0.614	1.82263e-29	6	GPHN
1.19879e-33	1.12381	0.771	0.735	4.22214e-29	6	FBXL17
3.1954e-33	1.12515	0.731	0.664	1.12542e-28	6	ASAP1
3.9317e-33	0.991245	0.793	0.789	1.38474e-28	6	DOCK11
4.79831e-33	1.02371	0.913	0.925	1.68997e-28	6	FKBP5
6.75713e-33	0.517854	0.963	0.993	2.37986e-28	6	PTPRC
1.61935e-32	1.53811	0.681	0.567	5.70335e-28	6	BTBD11
1.68224e-32	0.758103	0.895	0.932	5.92484e-28	6	FYB1
1.76449e-32	1.06962	0.765	0.733	6.21454e-28	6	PDE7A
3.34184e-32	0.945939	0.814	0.856	1.177e-27	6	PPP2R5C
4.35974e-32	1.09257	0.715	0.623	1.5355e-27	6	ZEB1
6.14309e-32	1.03581	0.731	0.674	2.1636e-27	6	KDM2A
6.191e-32	1.31403	0.628	0.498	2.18047e-27	6	ITPKB
7.04324e-32	1.14166	0.703	0.631	2.48063e-27	6	PIK3CD
1.57081e-31	0.758059	0.895	0.942	5.53238e-27	6	AKAP13
2.19345e-31	1.02898	0.743	0.745	7.72535e-27	6	TBL1XR1
5.385e-31	1.19575	0.613	0.461	1.8966e-26	6	CUX1
1.04721e-30	0.980698	0.703	0.637	3.68828e-26	6	KDM6A
1.35627e-30	0.947547	0.786	0.758	4.77678e-26	6	PPP3CC
1.4544e-30	1.01259	0.789	0.799	5.1224e-26	6	ZCCHC7
1.57356e-30	0.888279	0.755	0.729	5.54208e-26	6	MACF1
2.46302e-30	1.09388	0.793	0.799	8.67477e-26	6	ARHGEF3
4.0934e-30	1.06495	0.384	0.182	1.4417e-25	6	KEG06-p02
4.32505e-30	1.05933	0.703	0.653	1.52328e-25	6	STIM1
7.95876e-30	1.09771	0.619	0.496	2.80308e-25	6	ZZEF1
1.0022e-29	0.771703	0.833	0.874	3.52975e-25	6	USP15
1.44565e-29	1.15141	0.638	0.542	5.09157e-25	6	GRAP2
1.77957e-29	0.890213	0.796	0.816	6.26766e-25	6	STK38
2.27054e-29	0.683753	0.885	0.922	7.99684e-25	6	RABGAP1L
4.81402e-29	1.02991	0.675	0.569	1.6955e-24	6	MAN2A1
5.83913e-29	1.03015	0.684	0.607	2.05654e-24	6	TAOK1
7.53714e-29	0.982629	0.712	0.631	2.65458e-24	6	SLC12A6
9.88427e-29	0.962072	0.892	0.864	3.48124e-24	6	KEG06-r02
1.83996e-28	0.927031	0.765	0.795	6.48035e-24	6	ERBIN
4.29594e-28	0.677648	0.867	0.898	1.51303e-23	6	MYCBP2
5.37727e-28	1.07397	0.721	0.726	1.89388e-23	6	VTI1A
7.88031e-28	1.00433	0.712	0.635	2.77545e-23	6	ITGA6
7.88476e-28	0.908219	0.718	0.659	2.77701e-23	6	CEP85L
1.05412e-27	0.881632	0.709	0.637	3.71261e-23	6	LOC698045
1.72966e-27	1.01198	0.697	0.656	6.09187e-23	6	ATM
2.00391e-27	0.876958	0.793	0.825	7.05776e-23	6	ACAP2
2.89756e-27	0.914502	0.663	0.61	1.02052e-22	6	UBR3
4.64089e-27	0.995323	0.762	0.755	1.63452e-22	6	RHOH
4.64602e-27	0.933753	0.728	0.732	1.63633e-22	6	SENP6
5.2929e-27	1.03033	0.628	0.535	1.86416e-22	6	NCK2
6.09739e-27	1.20098	0.628	0.523	2.1475e-22	6	ANKH
8.04073e-27	0.744531	0.802	0.848	2.83195e-22	6	ARID4B
1.12925e-26	0.888796	0.749	0.764	3.97722e-22	6	RASA2
1.18973e-26	0.977861	0.718	0.692	4.19023e-22	6	SEMA4D
1.22851e-26	1.00649	0.619	0.497	4.3268e-22	6	RASA3
2.46656e-26	1.45867	0.808	0.806	8.68721e-22	6	BCL2
3.68024e-26	0.886395	0.774	0.791	1.29618e-21	6	KAT6A
5.56301e-26	1.16511	0.715	0.654	1.95929e-21	6	SMYD3
6.08148e-26	1.08376	0.588	0.463	2.1419e-21	6	ZHX2
7.17736e-26	0.943545	0.697	0.663	2.52787e-21	6	FRYL
7.70271e-26	0.954013	0.684	0.609	2.71289e-21	6	DGKA
7.76234e-26	0.879404	0.703	0.667	2.7339e-21	6	ITCH
7.81194e-26	0.956985	0.61	0.505	2.75137e-21	6	OGA
1.13154e-25	0.881828	0.743	0.733	3.98528e-21	6	MAP3K1
2.2329e-25	0.991574	0.681	0.638	7.86427e-21	6	SPPL3
2.23366e-25	0.980101	0.749	0.752	7.86695e-21	6	FBXO34
4.6125e-25	0.855924	0.734	0.708	1.62452e-20	6	ITSN2
5.85845e-25	1.04683	0.65	0.599	2.06335e-20	6	THADA
1.03398e-24	0.764555	0.817	0.854	3.64168e-20	6	CBLB
1.11689e-24	1.01787	0.554	0.401	3.93369e-20	6	PATJ
1.22946e-24	0.859377	0.777	0.708	4.33016e-20	6	RCAN3
1.60646e-24	0.957542	0.663	0.608	5.65795e-20	6	BRAF
2.36498e-24	0.738224	0.774	0.785	8.32947e-20	6	NSD3
3.18602e-24	0.989688	0.712	0.674	1.12212e-19	6	MALT1
5.41604e-24	0.903789	0.759	0.78	1.90753e-19	6	PAN3
5.42362e-24	0.945755	0.693	0.642	1.9102e-19	6	MGAT5
7.22912e-24	0.907846	0.703	0.689	2.5461e-19	6	GSK3B
8.24452e-24	0.897582	0.632	0.536	2.90372e-19	6	HACE1
9.56469e-24	0.851293	0.684	0.643	3.36868e-19	6	TNRC6C
1.27182e-23	0.91906	0.666	0.624	4.47935e-19	6	PSPC1
1.47359e-23	0.982723	0.622	0.56	5.18998e-19	6	ZMYND8
1.78481e-23	0.825367	0.759	0.816	6.2861e-19	6	SORL1
1.8654e-23	1.37915	0.548	0.404	6.56994e-19	6	MAML3
3.10565e-23	0.93556	0.656	0.604	1.09381e-18	6	BRWD1
3.4093e-23	0.881398	0.709	0.734	1.20075e-18	6	TNRC6A
3.41163e-23	1.27738	0.594	0.474	1.20158e-18	6	ST6GALNAC5
3.93384e-23	0.935065	0.675	0.657	1.3855e-18	6	HERC3
5.18604e-23	0.999517	0.659	0.603	1.82652e-18	6	TMEM123
5.60836e-23	1.07477	0.588	0.501	1.97526e-18	6	TBC1D1
5.91183e-23	0.888869	0.734	0.756	2.08215e-18	6	DOCK2
6.15614e-23	0.811962	0.712	0.695	2.16819e-18	6	PPP6R3
6.86263e-23	0.758694	0.864	0.899	2.41702e-18	6	ITK
7.01147e-23	0.646762	0.836	0.863	2.46944e-18	6	SEPTIN6
8.216e-23	0.949433	0.672	0.595	2.89367e-18	6	IL6ST
1.0112e-22	1.02894	0.613	0.539	3.56145e-18	6	ARHGEF7
1.01901e-22	0.984268	0.656	0.59	3.58897e-18	6	EXOC6
1.48347e-22	1.14316	0.588	0.46	5.22478e-18	6	DNM3
1.58186e-22	0.944813	0.669	0.65	5.5713e-18	6	DTNBP1
2.02158e-22	1.02906	0.539	0.388	7.12001e-18	6	SLC22A23
2.75764e-22	0.288954	0.969	0.999	9.71242e-18	6	LOC109910387
3.19896e-22	0.951767	0.721	0.728	1.12667e-17	6	R3HDM2
4.38338e-22	0.744295	0.746	0.723	1.54382e-17	6	PICALM
4.79283e-22	0.934984	0.703	0.69	1.68803e-17	6	PHIP
5.35254e-22	0.915211	0.675	0.672	1.88517e-17	6	ZMYM2
6.41373e-22	1.177	0.607	0.495	2.25892e-17	6	PLCL1
7.87455e-22	1.30782	0.672	0.637	2.77342e-17	6	IMMP2L
8.85155e-22	0.994084	0.777	0.783	3.11752e-17	6	INPP4B
1.71681e-21	1.2161	0.523	0.372	6.0466e-17	6	BMPR1B
2.00859e-21	0.904303	0.523	0.389	7.07425e-17	6	INPP5A
2.14434e-21	1.11051	0.514	0.349	7.55238e-17	6	TANC1
2.15297e-21	0.934414	0.607	0.531	7.58278e-17	6	CLASP1
2.32588e-21	0.931871	0.647	0.593	8.19175e-17	6	LOC709083
2.50798e-21	0.835598	0.653	0.598	8.8331e-17	6	CCDC88C
2.70416e-21	1.05729	0.598	0.486	9.52406e-17	6	PCNX2
2.9182e-21	0.980876	0.613	0.537	1.02779e-16	6	TRAPPC9
3.14771e-21	0.825241	0.734	0.716	1.10862e-16	6	FAF1
3.31277e-21	0.883643	0.641	0.609	1.16676e-16	6	LOC701819
3.42221e-21	0.672973	0.867	0.906	1.2053e-16	6	MBP
6.84762e-21	0.901008	0.669	0.604	2.41173e-16	6	STK24
7.87144e-21	0.783998	0.731	0.729	2.77232e-16	6	CYLD
7.93065e-21	0.724809	0.765	0.786	2.79318e-16	6	ATRX
8.11039e-21	0.959416	0.582	0.488	2.85648e-16	6	STRN3
1.21245e-20	0.577901	0.898	0.96	4.27024e-16	6	CHD2
1.50694e-20	1.19193	0.625	0.589	5.30745e-16	6	LOC106999943
1.87783e-20	0.805991	0.693	0.714	6.61373e-16	6	RSF1
1.8893e-20	0.900776	0.619	0.542	6.65413e-16	6	GIGYF2
1.89433e-20	1.11909	0.557	0.444	6.67182e-16	6	ERC1
2.14204e-20	0.912542	0.724	0.725	7.54425e-16	6	ARL15
2.51497e-20	0.886986	0.644	0.578	8.85774e-16	6	PDS5A
2.86156e-20	1.05102	0.607	0.51	1.00784e-15	6	CARD11
3.51042e-20	0.712362	0.731	0.751	1.23637e-15	6	NCOR1
3.58252e-20	0.701083	0.752	0.799	1.26176e-15	6	KMT2E
3.66059e-20	0.959281	0.622	0.578	1.28926e-15	6	DIS3L2
4.08318e-20	0.907729	0.675	0.678	1.4381e-15	6	PHC3
6.93332e-20	0.887715	0.712	0.733	2.44192e-15	6	MAN1A1
9.0953e-20	0.91253	0.653	0.618	3.20337e-15	6	PLCL2
1.02241e-19	0.945116	0.681	0.675	3.60093e-15	6	CASC4
1.47609e-19	0.933476	0.69	0.693	5.1988e-15	6	WASF2
1.5966e-19	1.08665	0.616	0.535	5.62321e-15	6	OXR1
3.00037e-19	0.931028	0.724	0.741	1.05673e-14	6	MPP7
3.36793e-19	0.984978	0.647	0.616	1.18618e-14	6	GATAD2B
4.11045e-19	1.14287	0.663	0.629	1.4477e-14	6	BCAS3
4.22804e-19	0.907318	0.687	0.693	1.48912e-14	6	FNIP1
7.18162e-19	0.844702	0.724	0.722	2.52937e-14	6	RFX3
1.04447e-18	0.826527	0.675	0.654	3.67864e-14	6	PHF20
1.36139e-18	0.827004	0.632	0.598	4.79481e-14	6	WDR33
1.36456e-18	0.934527	0.582	0.493	4.80598e-14	6	KEG06-p06
1.57893e-18	0.742517	0.734	0.766	5.56098e-14	6	COG5
1.7697e-18	0.849154	0.656	0.633	6.23289e-14	6	UVRAG
2.28119e-18	0.957323	0.616	0.579	8.03436e-14	6	ATAD2B
4.01673e-18	0.962739	0.517	0.423	1.41469e-13	6	PRKAG2
4.72672e-18	0.586375	0.799	0.855	1.66475e-13	6	PNISR
5.31465e-18	1.03141	0.669	0.691	1.87182e-13	6	CHST11
7.38264e-18	0.751078	0.786	0.853	2.60016e-13	6	LOC106999939
8.12922e-18	0.834774	0.684	0.709	2.86311e-13	6	RICTOR
1.03175e-17	0.96579	0.622	0.593	3.63383e-13	6	UBE2H
1.05028e-17	0.892042	0.619	0.585	3.69908e-13	6	UBR5
1.17347e-17	1.03898	0.573	0.497	4.13296e-13	6	RETREG1
1.19582e-17	0.972665	0.805	0.849	4.21167e-13	6	SOS1
1.20774e-17	0.763853	0.678	0.698	4.25367e-13	6	PUM2
1.23842e-17	1.21673	0.452	0.322	4.36173e-13	6	LDLRAD4
1.25393e-17	0.933115	0.489	0.369	4.41635e-13	6	PLEKHM3
1.31094e-17	1.13254	0.52	0.399	4.61712e-13	6	EVA1C
1.46516e-17	0.742555	0.746	0.831	5.16028e-13	6	BPTF
1.50084e-17	0.599346	0.867	0.924	5.28595e-13	6	ANKRD12
1.71889e-17	0.972683	0.483	0.363	6.05395e-13	6	CHD7
1.75041e-17	0.91851	0.659	0.636	6.16493e-13	6	ANKRD17
2.32705e-17	0.910318	0.628	0.612	8.19586e-13	6	TAF3
2.63885e-17	0.742682	0.675	0.688	9.29404e-13	6	STAG2
3.02537e-17	0.874144	0.65	0.636	1.06554e-12	6	GPATCH8
3.73455e-17	0.937587	0.675	0.686	1.31531e-12	6	TRPS1
4.62302e-17	0.852654	0.588	0.542	1.62823e-12	6	CHD6
5.35372e-17	0.924318	0.65	0.633	1.88558e-12	6	RPRD2
9.48003e-17	0.721739	0.724	0.751	3.33887e-12	6	TGFBR2
9.97569e-17	1.07946	0.594	0.571	3.51344e-12	6	ZNF407
1.23558e-16	0.819946	0.663	0.649	4.3517e-12	6	STAT5B
1.62892e-16	0.80296	0.61	0.579	5.73704e-12	6	ATXN2
1.65581e-16	0.69558	0.737	0.81	5.83177e-12	6	CAB39
1.83198e-16	0.926612	0.529	0.445	6.45223e-12	6	ZMYM4
1.91663e-16	0.829412	0.622	0.593	6.75036e-12	6	TUT4
2.14852e-16	0.807627	0.7	0.715	7.5671e-12	6	SETX
2.16731e-16	1.01742	0.464	0.353	7.63325e-12	6	FOXK1
2.65351e-16	0.797567	0.684	0.706	9.34567e-12	6	CDK13
2.68784e-16	0.944699	0.511	0.413	9.46657e-12	6	TCF20
2.7119e-16	0.692946	0.802	0.893	9.5513e-12	6	ABLIM1
2.78651e-16	0.896597	0.644	0.637	9.81408e-12	6	RNF38
3.95134e-16	1.14595	0.563	0.516	1.39166e-11	6	UBASH3B
3.97424e-16	0.818515	0.669	0.679	1.39973e-11	6	NSD1
4.56616e-16	0.981776	0.536	0.449	1.6082e-11	6	TANGO6
4.61081e-16	0.936232	0.622	0.579	1.62393e-11	6	SLC9A9
5.30911e-16	0.755246	0.48	0.371	1.86987e-11	6	SPTBN1
6.16579e-16	0.853957	0.675	0.698	2.17159e-11	6	RASSF3
6.53449e-16	0.61051	0.824	0.872	2.30145e-11	6	SH3KBP1
7.63721e-16	0.843344	0.573	0.531	2.68983e-11	6	USP9Y
7.95103e-16	0.828688	0.734	0.771	2.80035e-11	6	SRPK2
9.00232e-16	0.893642	0.638	0.618	3.17062e-11	6	THEMIS
9.0971e-16	0.865638	0.567	0.498	3.204e-11	6	ZZZ3
9.55183e-16	0.953146	0.563	0.499	3.36415e-11	6	LRIG1
1.05831e-15	0.683806	0.755	0.818	3.72736e-11	6	PRRC2C
1.10802e-15	0.871812	0.551	0.483	3.90246e-11	6	UBE3C
1.21775e-15	0.993623	0.536	0.463	4.28893e-11	6	MBTD1
1.43192e-15	1.13923	0.449	0.323	5.04322e-11	6	PITPNM2
2.54308e-15	0.979544	0.523	0.463	8.95672e-11	6	SMAD3
2.70849e-15	0.934241	0.536	0.452	9.5393e-11	6	NBEA
3.55404e-15	0.85223	0.427	0.3	1.25173e-10	6	ZFYVE9
3.71696e-15	1.01077	0.681	0.674	1.30911e-10	6	TOX
3.78543e-15	0.896596	0.486	0.379	1.33323e-10	6	MLXIP
5.83094e-15	0.683255	0.697	0.718	2.05366e-10	6	ATF7IP
6.20604e-15	0.782721	0.672	0.7	2.18577e-10	6	NFATC3
6.47964e-15	0.834576	0.511	0.421	2.28213e-10	6	VPS13D
8.24121e-15	0.862619	0.616	0.614	2.90256e-10	6	WDR7
9.08431e-15	0.737173	0.669	0.644	3.1995e-10	6	DLG1
9.29249e-15	0.836598	0.57	0.545	3.27282e-10	6	ARFGEF1
9.42333e-15	0.880066	0.563	0.502	3.3189e-10	6	RBM6
1.0586e-14	0.893717	0.588	0.544	3.72839e-10	6	PCCA
1.25486e-14	0.671755	0.749	0.789	4.41963e-10	6	CCM2
1.28123e-14	0.864528	0.554	0.494	4.5125e-10	6	MED13
1.30087e-14	0.797072	0.591	0.56	4.58168e-10	6	DYM
1.64109e-14	0.801596	0.632	0.639	5.77993e-10	6	FGD3
1.64608e-14	0.750966	0.607	0.591	5.79749e-10	6	LOC713490
1.78338e-14	0.856251	0.604	0.556	6.28106e-10	6	DDHD1
1.78974e-14	0.799076	0.61	0.59	6.30347e-10	6	KIAA1257
1.85341e-14	0.772223	0.715	0.743	6.52773e-10	6	LNPEP
1.91161e-14	0.762423	0.604	0.574	6.73269e-10	6	HUWE1
2.00991e-14	0.834234	0.545	0.485	7.0789e-10	6	NRF1
2.14365e-14	1.00449	0.523	0.465	7.54994e-10	6	FAM193A
2.36474e-14	0.785552	0.582	0.558	8.32863e-10	6	WWP1
2.4145e-14	0.801661	0.601	0.583	8.50387e-10	6	SMARCC1
2.49087e-14	0.858822	0.647	0.636	8.77284e-10	6	CREB1
2.50032e-14	0.92081	0.56	0.516	8.80613e-10	6	LRCH3
2.67513e-14	0.71668	0.616	0.606	9.4218e-10	6	SCAF8
2.96182e-14	0.820851	0.56	0.524	1.04315e-09	6	DENND6A
3.3425e-14	0.684032	0.669	0.702	1.17723e-09	6	MKLN1
3.79313e-14	0.93299	0.579	0.536	1.33594e-09	6	SPIDR
4.53587e-14	0.747854	0.659	0.696	1.59753e-09	6	RASGRP1
4.64129e-14	0.8076	0.622	0.618	1.63466e-09	6	ARID1A
5.46249e-14	0.679796	0.656	0.685	1.92389e-09	6	CUL3
6.24493e-14	1.0277	0.433	0.32	2.19946e-09	6	LOC106997133
7.20721e-14	1.07993	0.467	0.364	2.53838e-09	6	NR3C2
7.39532e-14	0.875734	0.437	0.324	2.60463e-09	6	C18H18orf25
7.46444e-14	0.868059	0.517	0.455	2.62897e-09	6	TASP1
7.50123e-14	0.785287	0.622	0.624	2.64193e-09	6	WDR70
7.50172e-14	0.85843	0.471	0.376	2.64211e-09	6	SYNE3
7.58399e-14	0.837119	0.579	0.546	2.67108e-09	6	SLMAP
8.27638e-14	0.794248	0.721	0.648	2.91494e-09	6	CA6
8.5608e-14	0.794211	0.443	0.339	3.01511e-09	6	KLHL6
1.23177e-13	0.79696	0.65	0.642	4.3383e-09	6	RBMS1
1.27329e-13	0.898441	0.554	0.519	4.48454e-09	6	CSNK1G1
1.35018e-13	0.796684	0.554	0.507	4.75533e-09	6	CNOT2
1.35788e-13	0.868082	0.43	0.331	4.78246e-09	6	DNMT3A
1.61566e-13	0.83627	0.489	0.399	5.69035e-09	6	RALGAPA2
1.88576e-13	1.13383	0.461	0.364	6.64165e-09	6	2024-03-03
1.96813e-13	0.895892	0.563	0.534	6.93176e-09	6	BRD4
2.08755e-13	0.812451	0.65	0.675	7.35236e-09	6	HERC4
2.4142e-13	0.83368	0.607	0.616	8.50282e-09	6	COP1
3.06314e-13	0.744814	0.554	0.527	1.07884e-08	6	RBM33
3.27957e-13	0.895233	0.409	0.292	1.15506e-08	6	GPR155
3.55761e-13	0.865132	0.588	0.557	1.25299e-08	6	ERN1
4.64006e-13	0.905989	0.628	0.617	1.63423e-08	6	MAP3K5
4.65616e-13	0.75942	0.681	0.786	1.6399e-08	6	WIPF1
4.84588e-13	0.946754	0.495	0.419	1.70672e-08	6	DENND5A
5.61685e-13	0.834744	0.7	0.743	1.97825e-08	6	SIK3
5.6416e-13	0.822467	0.526	0.464	1.98697e-08	6	MON2
5.73731e-13	1.13935	0.554	0.474	2.02068e-08	6	KCNQ5
6.12399e-13	0.881569	0.526	0.474	2.15687e-08	6	DENND1A
7.18415e-13	0.662193	0.632	0.664	2.53026e-08	6	CYFIP2
7.8569e-13	0.686955	0.625	0.609	2.7672e-08	6	PCM1
9.71508e-13	1.14877	0.44	0.341	3.42165e-08	6	UBE2E2
1.03229e-12	0.73113	0.365	0.242	3.63572e-08	6	PLCG1
1.09818e-12	0.659162	0.638	0.639	3.86779e-08	6	NSF
1.23242e-12	0.837963	0.567	0.528	4.34059e-08	6	GIT2
1.2335e-12	0.834914	0.573	0.547	4.34437e-08	6	PHF21A
1.24928e-12	0.681526	0.622	0.633	4.39996e-08	6	LCP2
1.29686e-12	0.862753	0.604	0.612	4.56753e-08	6	EEA1
1.35781e-12	0.835918	0.601	0.593	4.78221e-08	6	FLI1
1.39306e-12	0.712824	0.647	0.685	4.90636e-08	6	AKAP9
1.72751e-12	0.696337	0.675	0.739	6.08428e-08	6	CNOT6L
1.73955e-12	0.741437	0.622	0.637	6.12669e-08	6	EP300
2.02698e-12	0.717194	0.601	0.602	7.13901e-08	6	HELZ
2.14142e-12	0.88755	0.619	0.615	7.54208e-08	6	IPCEF1
2.23539e-12	0.786813	0.557	0.526	7.87303e-08	6	SETD5
2.43107e-12	0.79641	0.443	0.347	8.56223e-08	6	PIAS2
2.60829e-12	0.816091	0.368	0.253	9.18641e-08	6	RREB1
3.52947e-12	0.727866	0.551	0.501	1.24308e-07	6	NKTR
3.62129e-12	1.08892	0.316	0.198	1.27542e-07	6	ADAMTS17
4.02947e-12	0.833951	0.628	0.629	1.41918e-07	6	TAB2
4.03297e-12	0.858652	0.347	0.231	1.42041e-07	6	LOC106997195
4.35166e-12	0.726837	0.622	0.672	1.53266e-07	6	BBX
4.63729e-12	0.740319	0.542	0.484	1.63325e-07	6	SPEN
5.02061e-12	0.858488	0.598	0.612	1.76826e-07	6	LOC106992273
5.18009e-12	0.848967	0.594	0.598	1.82443e-07	6	PHF14
5.25448e-12	0.950643	0.551	0.509	1.85063e-07	6	SCFD2
6.33601e-12	0.784721	0.526	0.474	2.23154e-07	6	CNOT1
6.43267e-12	0.623419	0.78	0.792	2.26559e-07	6	IQGAP2
6.98122e-12	0.819026	0.647	0.683	2.45879e-07	6	ARIH1
7.92735e-12	0.794294	0.406	0.301	2.79201e-07	6	VPS53
8.3491e-12	0.82049	0.461	0.387	2.94055e-07	6	AMBRA1
8.9872e-12	0.936545	0.467	0.397	3.16529e-07	6	REPS1
9.39711e-12	0.595325	0.721	0.769	3.30966e-07	6	RNF213
1.0059e-11	0.756574	0.567	0.548	3.54279e-07	6	CLASP2
1.09964e-11	1.0043	0.427	0.327	3.87293e-07	6	SBF2
1.36181e-11	0.824688	0.579	0.554	4.79629e-07	6	MARK3
1.42364e-11	0.855555	0.573	0.556	5.01405e-07	6	SLC30A7
1.60082e-11	0.620525	0.656	0.687	5.6381e-07	6	RNF145
1.61629e-11	0.604395	0.712	0.733	5.69259e-07	6	PIK3R5
1.66369e-11	0.900944	0.471	0.398	5.85952e-07	6	FANCC
1.79458e-11	0.71644	0.533	0.497	6.3205e-07	6	NUP98
1.81646e-11	0.620671	0.734	0.809	6.39756e-07	6	ARGLU1
1.83632e-11	0.654631	0.669	0.709	6.46753e-07	6	WAC
1.92316e-11	0.694469	0.7	0.745	6.77335e-07	6	PTPN4
2.20887e-11	0.629716	0.669	0.726	7.77963e-07	6	PIAS1
2.23821e-11	0.939702	0.375	0.277	7.88297e-07	6	ABCC1
2.6222e-11	0.728976	0.635	0.635	9.23539e-07	6	RAPGEF1
2.70053e-11	0.6497	0.52	0.457	9.51126e-07	6	ATP11B
2.85473e-11	0.69468	0.498	0.441	1.00544e-06	6	PRKX
2.91496e-11	0.674089	0.659	0.677	1.02665e-06	6	HERC1
3.02301e-11	0.858899	0.427	0.336	1.06471e-06	6	SFMBT2
3.11155e-11	0.769802	0.384	0.282	1.09589e-06	6	AVL9
3.28337e-11	1.03166	0.43	0.351	1.1564e-06	6	ZNF827
3.45381e-11	0.77723	0.421	0.338	1.21643e-06	6	DGCR2
3.66284e-11	0.803072	0.505	0.452	1.29005e-06	6	TENT2
3.72496e-11	0.805119	0.616	0.626	1.31193e-06	6	SUCLG2
3.77553e-11	0.734649	0.579	0.583	1.32974e-06	6	TMEM131
4.46576e-11	0.764211	0.663	0.71	1.57284e-06	6	EXOC6B
4.51007e-11	0.9521	0.467	0.401	1.58845e-06	6	MRTFA
4.79731e-11	1.00526	0.477	0.42	1.68961e-06	6	ZSWIM6
4.8823e-11	0.79215	0.529	0.505	1.71955e-06	6	ATXN7
5.07327e-11	0.781277	0.573	0.572	1.7868e-06	6	KIAA1109
5.54346e-11	0.815125	0.542	0.503	1.95241e-06	6	P2RY8
5.5728e-11	0.604989	0.663	0.725	1.96274e-06	6	SCAF11
5.67107e-11	0.797002	0.585	0.591	1.99735e-06	6	ZMYND11
5.6731e-11	0.836327	0.579	0.599	1.99807e-06	6	REV3L
6.17018e-11	0.680402	0.622	0.645	2.17314e-06	6	SMC5
6.51435e-11	0.961091	0.567	0.583	2.29435e-06	6	GMDS
6.69558e-11	0.772881	0.622	0.624	2.35818e-06	6	RBPMS
7.41029e-11	0.736696	0.415	0.325	2.6099e-06	6	RNF111
8.26467e-11	0.766223	0.523	0.483	2.91082e-06	6	ATP9B
8.43159e-11	0.790209	0.533	0.509	2.96961e-06	6	FTO
8.43895e-11	0.686118	0.551	0.536	2.9722e-06	6	RNGTT
9.77058e-11	0.733299	0.551	0.539	3.4412e-06	6	TRIP12
1.02484e-10	0.965832	0.353	0.249	3.60947e-06	6	SNED1
1.15405e-10	1.04078	0.52	0.487	4.06457e-06	6	NUMB
1.16293e-10	0.738043	0.616	0.609	4.09583e-06	6	DCAF5
1.40738e-10	0.739022	0.502	0.448	4.95679e-06	6	FAM214A
1.48281e-10	0.778185	0.461	0.384	5.22246e-06	6	MRTFB
1.50158e-10	0.734921	0.477	0.411	5.28857e-06	6	UXS1
1.59106e-10	0.992769	0.474	0.423	5.60372e-06	6	TMCC1
1.6469e-10	0.627909	0.697	0.772	5.8004e-06	6	KMT2A
1.82098e-10	0.762821	0.452	0.375	6.4135e-06	6	RFTN1
1.86584e-10	0.487016	0.762	0.874	6.57147e-06	6	SRSF11
1.89583e-10	0.569685	0.672	0.707	6.67712e-06	6	PAFAH1B1
1.9381e-10	0.768916	0.585	0.587	6.82597e-06	6	FCHSD2
1.9843e-10	0.733945	0.656	0.687	6.9887e-06	6	NCOA2
2.37855e-10	0.710049	0.533	0.503	8.37724e-06	6	FAM117A
2.64787e-10	0.756546	0.455	0.369	9.32581e-06	6	APP
2.86788e-10	0.851066	0.542	0.533	1.01007e-05	6	FBXO11
2.92941e-10	0.714485	0.337	0.241	1.03174e-05	6	FAM168B
3.03224e-10	0.701479	0.607	0.625	1.06796e-05	6	CD6
3.08622e-10	1.07245	0.467	0.422	1.08697e-05	6	ETV6
3.08846e-10	0.631585	0.601	0.623	1.08776e-05	6	ZNF638
3.56204e-10	0.793854	0.449	0.382	1.25455e-05	6	PPP6R2
3.56379e-10	0.852254	0.365	0.27	1.25517e-05	6	KLF7
3.67315e-10	0.842841	0.533	0.51	1.29368e-05	6	ASXL2
3.67402e-10	0.618266	0.752	0.878	1.29399e-05	6	UBE2D2
4.01972e-10	0.715557	0.588	0.593	1.41574e-05	6	ADAM10
4.38335e-10	0.591576	0.78	0.881	1.54381e-05	6	TNFAIP8
5.19978e-10	0.577065	0.554	0.532	1.83136e-05	6	OGT
5.42749e-10	0.870196	0.536	0.526	1.91156e-05	6	DTNB
5.48129e-10	0.738161	0.567	0.571	1.93051e-05	6	CCNY
5.92094e-10	0.7826	0.498	0.462	2.08536e-05	6	RAF1
5.9909e-10	0.75139	0.536	0.513	2.11e-05	6	NT5C2
6.16464e-10	0.789593	0.402	0.328	2.17119e-05	6	TRIM44
6.42697e-10	0.75648	0.57	0.578	2.26358e-05	6	LCOR
7.36685e-10	0.65632	0.644	0.676	2.5946e-05	6	STK10
7.68826e-10	0.626402	0.625	0.638	2.7078e-05	6	LYST
8.15862e-10	0.716478	0.576	0.574	2.87347e-05	6	CREBRF
9.09982e-10	0.839747	0.495	0.451	3.20496e-05	6	WDFY2
9.6577e-10	0.363374	0.796	0.828	3.40144e-05	6	EML4
1.07054e-09	0.795087	0.563	0.569	3.77044e-05	6	UBR1
1.15438e-09	0.758749	0.533	0.521	4.06572e-05	6	KDM3B
1.19321e-09	0.826765	0.44	0.371	4.20248e-05	6	WWP2
1.26283e-09	0.737153	0.551	0.547	4.4477e-05	6	SMARCA2
1.30622e-09	0.865171	0.43	0.363	4.6005e-05	6	LOC106993394
1.35974e-09	0.68121	0.591	0.621	4.78899e-05	6	PRRC2B
1.37368e-09	0.735527	0.44	0.381	4.83811e-05	6	LEMD3
1.40115e-09	0.624278	0.375	0.284	4.93485e-05	6	KANSL3
1.40829e-09	0.701372	0.505	0.467	4.95998e-05	6	TRIM33
1.4117e-09	0.727474	0.594	0.614	4.972e-05	6	DIAPH2
1.45806e-09	0.639238	0.582	0.602	5.13528e-05	6	EFR3A
1.46354e-09	0.707962	0.594	0.625	5.1546e-05	6	USP47
1.48044e-09	0.656343	0.576	0.575	5.21412e-05	6	TRPM7
1.48386e-09	0.764315	0.616	0.637	5.22614e-05	6	TTC17
1.69071e-09	0.712904	0.557	0.542	5.95467e-05	6	PTBP2
1.78351e-09	0.690935	0.56	0.571	6.28154e-05	6	SMG1
1.85818e-09	0.875738	0.437	0.366	6.5445e-05	6	GLCE
1.92688e-09	0.763113	0.489	0.454	6.78648e-05	6	PPM1B
1.97186e-09	0.735869	0.548	0.559	6.94489e-05	6	GOLGA4
2.20509e-09	0.762947	0.548	0.567	7.76631e-05	6	RB1CC1
2.35395e-09	0.893955	0.492	0.439	8.29063e-05	6	KLHL5
2.46246e-09	0.75315	0.467	0.411	8.6728e-05	6	MDM4
2.47014e-09	0.841996	0.601	0.6	8.69984e-05	6	PRKCA
2.6448e-09	0.759751	0.486	0.454	9.31498e-05	6	EPC2
2.68442e-09	0.69222	0.598	0.66	9.45452e-05	6	ARID2
2.93291e-09	0.702066	0.449	0.378	0.000103297	6	TNFSF8
3.0324e-09	0.745879	0.542	0.521	0.000106801	6	STK39
3.38929e-09	0.820846	0.514	0.493	0.000119371	6	STAU2
3.58418e-09	0.858946	0.467	0.419	0.000126235	6	GRK5
3.76258e-09	0.720069	0.467	0.416	0.000132518	6	CTDSPL2
3.95234e-09	0.640566	0.421	0.345	0.000139201	6	MINDY3
4.14187e-09	0.688578	0.39	0.313	0.000145877	6	HDAC4
4.2997e-09	0.702349	0.551	0.536	0.000151435	6	PCNX1
4.37711e-09	0.677198	0.421	0.339	0.000154162	6	HERC6
4.72828e-09	0.796944	0.415	0.348	0.00016653	6	QRICH1
5.03757e-09	0.714974	0.328	0.239	0.000177423	6	SLC7A6
5.21231e-09	0.935523	0.486	0.464	0.000183577	6	JARID2
5.72788e-09	0.5924	0.653	0.676	0.000201736	6	BABAM2
6.18423e-09	0.743859	0.474	0.44	0.000217809	6	LARP4B
6.91283e-09	0.616666	0.511	0.504	0.00024347	6	SND1
7.12468e-09	0.655886	0.616	0.651	0.000250931	6	SLC38A1
7.54564e-09	0.71072	0.446	0.38	0.000265757	6	KIAA0355
7.75577e-09	0.532887	0.641	0.697	0.000273158	6	CD46
8.83491e-09	0.65875	0.495	0.455	0.000311165	6	ACIN1
9.50365e-09	0.791764	0.449	0.405	0.000334719	6	MEMO1
1.05371e-08	0.712525	0.492	0.481	0.000371117	6	ADNP
1.16722e-08	0.890832	0.464	0.428	0.000411095	6	EIF2B3
1.23e-08	0.670115	0.61	0.644	0.000433207	6	OSBPL9
1.26578e-08	0.758721	0.372	0.295	0.000445809	6	ARFGEF2
1.31427e-08	0.859413	0.3	0.21	0.000462887	6	PRKN
1.37651e-08	0.75862	0.297	0.204	0.000484806	6	ALPK1
1.4962e-08	0.658263	0.57	0.582	0.000526962	6	ATP8A1
1.81764e-08	0.700398	0.347	0.265	0.000640174	6	NAA25
1.82422e-08	1.05396	0.269	0.179	0.000642489	6	IGF1R
1.83951e-08	0.668547	0.319	0.229	0.000647876	6	TNFRSF10D
1.8728e-08	0.576834	0.628	0.713	0.0006596	6	ZNF292
1.89237e-08	0.807315	0.554	0.584	0.000666492	6	GNB1
2.05833e-08	0.67438	0.44	0.367	0.000724944	6	ARHGAP1
2.15761e-08	0.766588	0.508	0.479	0.000759909	6	MGAT4A
2.27187e-08	0.761946	0.539	0.543	0.000800152	6	CDK17
2.29383e-08	0.573141	0.294	0.204	0.000807886	6	CLIP4
2.37014e-08	0.772201	0.319	0.238	0.000834765	6	CTDP1
2.42403e-08	0.704513	0.56	0.59	0.000853745	6	ZNF148
2.56917e-08	0.704918	0.418	0.357	0.000904862	6	BTRC
2.60297e-08	0.707167	0.576	0.617	0.000916765	6	SPATA13
2.65497e-08	0.651892	0.533	0.519	0.000935081	6	RELCH
2.6623e-08	0.772247	0.421	0.366	0.000937661	6	RABGAP1
2.89746e-08	0.732986	0.455	0.413	0.00102049	6	TLK2
3.02503e-08	0.796742	0.542	0.533	0.00106542	6	MBD5
3.24269e-08	0.907344	0.421	0.367	0.00114208	6	CMIP
3.25981e-08	0.830186	0.542	0.52	0.00114811	6	DPP4
3.27946e-08	0.829746	0.455	0.413	0.00115503	6	BICRAL
3.36108e-08	0.777304	0.452	0.413	0.00118377	6	SLC39A11
3.43649e-08	0.628703	0.678	0.738	0.00121033	6	TAOK3
3.56862e-08	0.736159	0.474	0.429	0.00125687	6	SNRNP70
3.57088e-08	0.845546	0.415	0.359	0.00125766	6	FAM168A
4.56314e-08	0.779551	0.458	0.417	0.00160714	6	NRIP1
4.96381e-08	0.662444	0.464	0.427	0.00174825	6	AKAP10
4.96535e-08	0.648693	0.591	0.623	0.00174879	6	NRROS
5.00136e-08	1.03773	0.402	0.343	0.00176148	6	LOC702071
5.146e-08	0.648049	0.573	0.599	0.00181242	6	LUC7L3
5.31134e-08	0.520919	0.663	0.755	0.00187066	6	HNRNPC
5.53703e-08	0.668346	0.526	0.492	0.00195014	6	IL6R
6.30324e-08	0.802893	0.529	0.527	0.00222	6	MDFIC
7.2212e-08	0.748443	0.48	0.456	0.0025433	6	PSME4
7.34429e-08	0.808985	0.424	0.364	0.00258666	6	ATRN
7.38707e-08	0.534958	0.666	0.705	0.00260172	6	INPP4A
7.56895e-08	0.559995	0.406	0.333	0.00266578	6	LOC114677617
7.57858e-08	0.809621	0.356	0.276	0.00266917	6	GRAMD1B
7.58632e-08	0.855688	0.455	0.413	0.0026719	6	TRAF3
7.87195e-08	0.75343	0.502	0.504	0.0027725	6	CUL5
8.74394e-08	0.676467	0.433	0.395	0.00307962	6	TNPO3
9.55166e-08	0.662564	0.455	0.416	0.00336409	6	GPR107
1.03653e-07	0.73111	0.415	0.369	0.00365066	6	HMBOX1
1.03655e-07	0.846527	0.347	0.267	0.00365071	6	ZNF618
1.08267e-07	0.815703	0.437	0.393	0.00381317	6	POU2F1
1.11134e-07	0.722294	0.437	0.386	0.00391415	6	LMBR1
1.11542e-07	0.688095	0.731	0.76	0.00392851	6	ITGA4
1.11673e-07	0.794449	0.498	0.479	0.00393312	6	SPATA5
1.24603e-07	0.689884	0.542	0.531	0.00438852	6	LOC114679371
1.2606e-07	0.544263	0.65	0.733	0.00443983	6	GNG2
1.28833e-07	0.678732	0.523	0.536	0.00453748	6	USP25
1.38595e-07	0.67425	0.576	0.616	0.00488133	6	PKN2
1.42075e-07	0.660967	0.461	0.442	0.00500388	6	USP10
1.66796e-07	0.728836	0.424	0.364	0.00587454	6	GPRIN3
1.67408e-07	0.664255	0.523	0.525	0.00589611	6	STXBP5
1.74554e-07	0.752418	0.393	0.342	0.00614778	6	VAV1
1.7702e-07	0.581987	0.533	0.543	0.00623464	6	ADD1
1.93777e-07	0.714724	0.406	0.338	0.00682483	6	ANKRD28
2.01775e-07	0.654331	0.557	0.592	0.00710652	6	UBE2K
2.05095e-07	0.600131	0.52	0.523	0.00722343	6	USP9X
2.20286e-07	0.635861	0.474	0.431	0.00775846	6	TESPA1
2.28909e-07	0.642857	0.353	0.272	0.00806216	6	DIP2C
2.35951e-07	0.676564	0.316	0.236	0.0083102	6	PPARD
2.4243e-07	0.620863	0.359	0.289	0.00853839	6	AP1G1
2.42653e-07	0.682455	0.452	0.425	0.00854624	6	HECTD1
2.50142e-07	0.648513	0.387	0.327	0.00881001	6	USP37
2.50276e-07	0.710204	0.455	0.419	0.00881474	6	LOC114671808
2.54229e-07	0.706916	0.282	0.203	0.00895393	6	ANKS1A
2.79647e-07	0.654339	0.502	0.497	0.00984918	6	DMTF1
2.86717e-07	0.750762	0.409	0.352	0.0100982	6	HIPK2
3.0705e-07	0.821656	0.455	0.416	0.0108143	6	PLEKHG1
3.11742e-07	0.599293	0.712	0.827	0.0109795	6	EVL
3.46569e-07	0.699611	0.421	0.377	0.0122062	6	FAM13B
3.5534e-07	0.851241	0.548	0.578	0.0125151	6	BTBD9
4.05323e-07	0.740487	0.489	0.48	0.0142755	6	TBC1D22A
4.12729e-07	0.589921	0.601	0.642	0.0145363	6	FNDC3A
4.18593e-07	0.653277	0.477	0.455	0.0147428	6	EHMT1
4.37543e-07	0.724005	0.508	0.531	0.0154102	6	STIM2
4.45294e-07	0.632764	0.396	0.34	0.0156833	6	INTS6L
4.55083e-07	0.778271	0.446	0.416	0.016028	6	CLSTN1
4.56241e-07	0.758676	0.291	0.216	0.0160688	6	SORBS1
4.59321e-07	0.74446	0.505	0.51	0.0161773	6	ME2
4.65817e-07	0.715991	0.452	0.437	0.0164061	6	TAF1
4.80743e-07	1.03615	0.505	0.519	0.0169318	6	CAMKMT
4.91162e-07	0.806045	0.458	0.457	0.0172987	6	MAP2K5
4.91299e-07	0.855182	0.536	0.564	0.0173035	6	NSMCE2
4.98058e-07	0.803768	0.474	0.459	0.0175416	6	RNF125
5.09158e-07	0.523253	0.604	0.646	0.0179325	6	CYTIP
5.21332e-07	0.639198	0.508	0.513	0.0183613	6	MECP2
5.39523e-07	0.651053	0.288	0.211	0.019002	6	RHBDD1
5.97997e-07	0.749915	0.446	0.424	0.0210615	6	GAPVD1
6.00912e-07	0.526796	0.638	0.73	0.0211641	6	LSM14A
6.01052e-07	0.795309	0.467	0.448	0.0211691	6	RASA1
6.0122e-07	0.638796	0.492	0.462	0.021175	6	NFATC2
6.06155e-07	0.962446	0.368	0.315	0.0213488	6	SHLD1
6.98208e-07	0.71257	0.452	0.425	0.0245909	6	LOC100499503
7.46051e-07	0.859213	0.502	0.513	0.0262759	6	SMG6
7.85776e-07	1.32356	0.313	0.235	0.027675	6	TSHZ2
8.10974e-07	0.709568	0.452	0.428	0.0285625	6	SMAD2
8.33633e-07	0.675984	0.443	0.407	0.0293605	6	RPTOR
8.58621e-07	0.651977	0.477	0.464	0.0302406	6	RALGAPA1
9.13181e-07	0.801731	0.35	0.292	0.0321622	6	ARHGAP35
9.37125e-07	0.813104	0.43	0.383	0.0330055	6	VPS54
9.40055e-07	0.635684	0.409	0.366	0.0331087	6	NUP214
9.7672e-07	0.71914	0.44	0.409	0.0344001	6	ANKFY1
1.01972e-06	0.68721	0.365	0.311	0.0359146	6	SCAF4
1.05585e-06	0.665742	0.365	0.302	0.0371871	6	KIAA0319L
1.06471e-06	0.808723	0.368	0.316	0.0374991	6	ARMH3
1.09629e-06	0.648969	0.412	0.365	0.0386112	6	SFSWAP
1.28024e-06	0.525019	0.505	0.497	0.0450901	6	CASP8
1.30975e-06	0.614935	0.517	0.54	0.0461293	6	ABI1
1.31821e-06	0.90998	0.35	0.29	0.0464275	6	TET3
1.38451e-06	0.628583	0.551	0.587	0.0487624	6	GTF2I
1.45386e-06	0.463073	0.709	0.837	0.0512049	6	NAP1L4

## Sheet: Cluster 7
p_val	avg_log2FC	pct.1	pct.2	p_val_adj	cluster	gene
1.02196e-193	1.14127	0.918	0.185	3.59935e-189	7	ZEB2
1.79548e-173	1.00427	0.889	0.195	6.32368e-169	7	RGS9
3.42948e-168	0.913219	0.93	0.2	1.20786e-163	7	CST7
4.81008e-168	1.03361	0.949	0.203	1.69411e-163	7	NKG7
3.77841e-167	0.822232	0.829	0.172	1.33076e-162	7	CLIC5
1.10412e-166	1.03653	0.959	0.225	3.88871e-162	7	TGFBR3
5.31005e-164	0.840222	0.772	0.153	1.8702e-159	7	PPP2R2B
2.0648e-163	0.948617	0.829	0.17	7.27224e-159	7	GZMH
5.63514e-153	0.915302	0.927	0.208	1.9847e-148	7	GZMB
5.5143e-147	0.825448	0.75	0.16	1.94213e-142	7	LOC114671905
2.31699e-141	0.587479	0.81	0.176	8.16044e-137	7	HOPX
3.86947e-141	0.598804	0.674	0.132	1.36283e-136	7	CLEC12A
5.11894e-136	0.588391	0.741	0.162	1.80289e-131	7	GNLY
1.0266e-135	0.480951	0.614	0.115	3.6157e-131	7	PRR5L
9.13663e-134	0.543543	0.655	0.13	3.21792e-129	7	NKG2D
1.2104e-132	0.589724	0.68	0.14	4.26304e-128	7	CX3CR1
5.0956e-132	0.641757	0.722	0.157	1.79467e-127	7	JAKMIP2
1.76124e-130	0.578512	0.658	0.135	6.20307e-126	7	TPD52
7.92338e-129	0.546168	0.611	0.118	2.79061e-124	7	GPR141
2.21367e-123	0.895117	0.918	0.269	7.79654e-119	7	RAP1GAP2
4.98909e-118	0.493111	0.522	0.098	1.75716e-113	7	SAMD3
5.36001e-112	0.642904	0.598	0.13	1.88779e-107	7	MAMU-DRA
1.39746e-111	0.758093	0.611	0.136	4.92187e-107	7	CCL5
1.64931e-108	0.707112	0.858	0.251	5.80887e-104	7	SYTL2
3.10441e-107	0.594769	0.709	0.174	1.09337e-102	7	GZMM
1.32669e-106	0.475196	0.579	0.123	4.6726e-102	7	LOC114669810
6.42546e-105	0.592474	0.582	0.13	2.26305e-100	7	IL7
1.52637e-102	0.535505	0.703	0.176	5.37588e-98	7	LOC114675357
1.93356e-102	1.04013	0.991	0.375	6.81001e-98	7	S100A4
1.20058e-100	0.498214	0.652	0.159	4.22843e-96	7	PRF1
1.87183e-99	0.462804	0.582	0.13	6.59258e-95	7	GOLIM4
4.06839e-97	0.418789	0.633	0.149	1.43289e-92	7	APOBEC3G
2.12834e-95	0.457015	0.788	0.217	7.49601e-91	7	C11H12orf75
4.32048e-93	0.656913	0.794	0.236	1.52167e-88	7	LOC705095
4.36393e-92	0.559458	0.646	0.165	1.53698e-87	7	MAMU-DRB1
4.87479e-92	0.534618	0.513	0.115	1.7169e-87	7	DOCK5
9.36813e-92	0.428605	0.674	0.17	3.29946e-87	7	LOC106993126
1.02745e-91	0.43673	0.465	0.096	3.61869e-87	7	KLRG1
5.55264e-90	0.366522	0.497	0.107	1.95564e-85	7	LOC100430627
5.81254e-88	0.360552	0.532	0.12	2.04718e-83	7	IL18
5.90811e-87	0.454844	0.44	0.092	2.08084e-82	7	CLECL1
2.67255e-84	0.70928	0.699	0.212	9.41272e-80	7	SNTB1
1.1904e-83	0.333146	0.386	0.074	4.19259e-79	7	NHSL2
6.92815e-83	0.808968	0.94	0.402	2.44009e-78	7	DNAJC1
1.57806e-82	0.894317	0.962	0.467	5.55794e-78	7	PARP8
3.71155e-82	0.34884	0.453	0.097	1.30721e-77	7	KLRF1
1.18346e-80	0.556683	0.699	0.205	4.16815e-76	7	ADAM23
4.61829e-80	0.355074	0.516	0.123	1.62656e-75	7	TBX21
1.13986e-79	0.66613	0.858	0.31	4.01459e-75	7	RAB27A
8.3319e-78	0.701699	0.835	0.283	2.93449e-73	7	LOC106992647
1.18749e-77	0.429517	0.462	0.107	4.18235e-73	7	FRY
2.22032e-73	0.346219	0.418	0.093	7.81995e-69	7	MAMU-DQA1
9.66671e-72	0.618035	0.642	0.2	3.40461e-67	7	CD74
7.83562e-71	0.523726	0.709	0.23	2.75971e-66	7	CPD
6.32851e-70	0.375449	0.741	0.229	2.2289e-65	7	LGALS3
1.83071e-68	0.54183	0.741	0.248	6.44775e-64	7	KAT2B
6.97694e-67	0.285627	0.38	0.084	2.45728e-62	7	RHOC
2.03842e-64	0.303862	0.421	0.101	7.17932e-60	7	JAKMIP1
9.91672e-63	0.279906	0.396	0.094	3.49267e-58	7	TSPAN2
1.31117e-62	0.325008	0.402	0.096	4.61795e-58	7	LOC106999823
4.24927e-62	0.607201	0.354	0.082	1.49659e-57	7	CACNA1B
2.31386e-61	0.685464	0.323	0.071	8.14942e-57	7	KLRB1
5.79961e-61	0.703367	0.994	0.825	2.04262e-56	7	EML4
1.89673e-60	0.315235	0.348	0.079	6.68029e-56	7	CSF1
2.59919e-60	0.677078	0.946	0.459	9.15434e-56	7	PTPRJ
2.67971e-60	0.729221	0.953	0.513	9.43793e-56	7	SYTL3
1.04206e-59	0.25041	0.351	0.08	3.67015e-55	7	MAMU-DRB5
1.38211e-59	0.279218	0.383	0.092	4.86781e-55	7	GAB3
2.11968e-59	0.28374	0.396	0.097	7.4655e-55	7	MAMU-DPB
5.87658e-59	0.327438	0.658	0.208	2.06973e-54	7	SEPTIN11
1.18397e-58	0.655375	0.997	0.789	4.16994e-54	7	S100A10
2.13508e-58	0.453241	0.826	0.318	7.51977e-54	7	MYO1F
2.38265e-58	0.366036	0.579	0.178	8.39171e-54	7	HEG1
2.5616e-58	0.359195	0.313	0.069	9.02194e-54	7	ST8SIA1
8.18436e-58	0.429094	0.728	0.258	2.88253e-53	7	SLA2
1.10219e-57	0.338173	0.411	0.106	3.88191e-53	7	GAS7
1.29808e-57	0.647062	0.959	0.488	4.57183e-53	7	PPP3CA
1.52591e-57	0.283748	0.427	0.11	5.37426e-53	7	LOC107000617
5.88237e-57	0.543053	1	0.942	2.07177e-52	7	SH3BGRL3
6.46501e-57	0.268877	0.316	0.07	2.27698e-52	7	CMA1
3.00462e-56	0.380503	0.633	0.206	1.05823e-51	7	EFHD2
1.79454e-55	0.444655	0.791	0.301	6.32038e-51	7	TNFRSF1B
3.10062e-55	0.304126	0.503	0.145	1.09204e-50	7	PRDM1
8.37873e-55	0.280651	0.367	0.091	2.95099e-50	7	DAPK2
1.8453e-54	0.603267	0.883	0.4	6.49916e-50	7	PTPN22
2.14617e-54	0.358596	0.598	0.193	7.55879e-50	7	MTMR12
4.67035e-54	0.369165	0.506	0.152	1.6449e-49	7	APOBEC3C
2.77838e-53	0.268721	0.358	0.088	9.78546e-49	7	MATK
4.20245e-53	0.749735	0.93	0.511	1.4801e-48	7	PDE3B
1.39919e-50	0.59408	0.981	0.68	4.92794e-46	7	HCST
1.93041e-49	0.610338	0.943	0.497	6.79892e-45	7	STAT4
9.31511e-49	0.582899	0.997	0.794	3.28078e-44	7	PPP1R12A
2.78787e-48	0.510531	0.927	0.455	9.81889e-44	7	LOC106993196
5.73616e-48	0.373005	0.832	0.342	2.02028e-43	7	SSBP4
6.11039e-48	0.38917	0.649	0.235	2.15208e-43	7	RUNX3
6.42733e-48	0.262636	0.285	0.066	2.26371e-43	7	HBA1
1.61218e-47	0.361184	0.687	0.251	5.6781e-43	7	DHRS7
3.22791e-47	0.501171	0.946	0.463	1.13687e-42	7	ATXN1
5.15282e-47	0.338554	0.541	0.18	1.81482e-42	7	BHLHE40
2.65312e-46	0.274434	0.491	0.152	9.3443e-42	7	SH2D2A
6.65037e-46	0.536573	0.934	0.513	2.34226e-41	7	AHNAK
8.70683e-46	0.42984	0.671	0.259	3.06655e-41	7	GTDC1
1.2787e-45	0.50587	0.782	0.337	4.5036e-41	7	TMTC2
1.74042e-45	0.341113	0.63	0.231	6.12976e-41	7	AGPAT4
2.68646e-45	0.512502	0.892	0.446	9.46172e-41	7	ITGAL
3.11216e-45	0.297426	0.614	0.214	1.0961e-40	7	APOBEC3H
3.2523e-45	0.266897	0.291	0.072	1.14546e-40	7	SLCO4C1
9.41374e-44	0.33183	0.491	0.163	3.31552e-39	7	LOC701439
2.93951e-43	0.252959	0.38	0.109	1.03529e-38	7	VOPP1
7.16944e-43	0.308634	0.266	0.065	2.52508e-38	7	WDR63
1.17382e-42	0.412918	0.699	0.281	4.13421e-38	7	ARHGAP26
2.01264e-42	0.308323	0.411	0.127	7.08852e-38	7	HIP1
4.08779e-42	0.343896	0.674	0.268	1.43972e-37	7	LOC706608
7.02828e-42	0.645091	0.81	0.401	2.47536e-37	7	RAPGEF2
8.82749e-42	0.533465	0.984	0.624	3.10904e-37	7	SLCO3A1
1.45102e-41	0.253902	0.585	0.206	5.11048e-37	7	ACTN4
1.73858e-41	0.322199	0.601	0.224	6.12327e-37	7	FNDC3B
2.5516e-41	0.345653	0.712	0.289	8.98674e-37	7	TESC
3.13696e-41	0.491719	0.994	0.825	1.10484e-36	7	SRGN
4.25148e-41	0.347572	0.747	0.306	1.49737e-36	7	ZBTB38
1.15738e-40	0.286312	0.434	0.14	4.07628e-36	7	FAM129A
2.6596e-40	0.277552	0.427	0.137	9.3671e-36	7	SRGAP2
3.44379e-40	0.500843	1	0.92	1.2129e-35	7	RABGAP1L
4.23115e-40	0.563376	0.975	0.672	1.49021e-35	7	BABAM2
7.42558e-40	0.314798	0.604	0.228	2.61529e-35	7	SLAMF6
7.63292e-40	0.460072	0.908	0.478	2.68831e-35	7	ITGB2
8.53461e-40	0.313225	0.358	0.109	3.00589e-35	7	TNFRSF18
9.42267e-40	0.538147	0.826	0.404	3.31867e-35	7	GLCCI1
9.99596e-40	0.342739	1	0.985	3.52058e-35	7	CD52
3.14048e-39	0.282172	0.443	0.146	1.10608e-34	7	EMB
7.97241e-39	0.305777	0.604	0.229	2.80788e-34	7	PLEKHG3
2.41581e-38	0.292151	0.532	0.189	8.50849e-34	7	USP28
2.7879e-38	0.261627	0.608	0.233	9.819e-34	7	MAF
2.8249e-38	0.475708	0.953	0.56	9.94928e-34	7	ANXA1
3.09226e-38	0.551338	0.959	0.665	1.08909e-33	7	CLEC2D
4.5654e-38	0.264114	0.472	0.16	1.60793e-33	7	ZYX
4.7804e-38	0.370781	0.573	0.22	1.68366e-33	7	ABHD17B
6.53455e-38	0.305317	0.544	0.201	2.30147e-33	7	ADCY9
1.13392e-37	0.465959	0.962	0.616	3.99365e-33	7	RORA
1.85805e-37	0.406729	0.924	0.518	6.54404e-33	7	LY6E-1
1.86587e-36	0.460707	0.557	0.225	6.57158e-32	7	CD96
2.91145e-36	0.27608	0.503	0.178	1.02541e-31	7	RASGEF1A
7.8786e-36	0.476809	0.756	0.37	2.77484e-31	7	TTC3
8.66443e-36	0.385013	0.873	0.432	3.05161e-31	7	ATP2B1
2.58033e-35	0.391567	0.772	0.36	9.08791e-31	7	ARAP2
4.12707e-35	0.491141	0.962	0.652	1.45355e-30	7	SYNE1
1.1406e-34	0.329766	0.595	0.242	4.0172e-30	7	TNFSF4
2.80657e-34	0.381409	0.997	0.829	9.88473e-30	7	CRIP1
3.59707e-33	0.384409	1	0.965	1.26689e-28	7	CD48
4.66795e-33	0.281371	0.601	0.242	1.64405e-28	7	TMEM181
5.23761e-33	0.400957	0.924	0.517	1.84469e-28	7	STK39
6.40672e-33	0.440509	0.981	0.838	2.25645e-28	7	TGFB1
6.57858e-33	0.487495	0.994	0.852	2.31697e-28	7	CBLB
3.2361e-32	0.490628	0.927	0.593	1.13975e-27	7	CEMIP2
5.19009e-32	0.446119	1	0.87	1.82795e-27	7	SH3KBP1
7.87769e-32	0.417036	0.962	0.73	2.77452e-27	7	S100A11
1.00183e-31	0.264353	0.43	0.154	3.52845e-27	7	DDX60
3.06358e-31	0.420271	0.915	0.554	1.07899e-26	7	PREX1
5.16996e-31	0.415416	0.94	0.571	1.82086e-26	7	ATP2B4
8.3422e-31	0.428466	0.937	0.625	2.93812e-26	7	FLNA
1.64781e-30	0.471111	0.984	0.659	5.80358e-26	7	LRRC8C
2.49832e-30	0.363046	0.997	0.91	8.7991e-26	7	RAP1B
4.90467e-30	0.389705	1	0.969	1.72743e-25	7	ANKRD44
1.35452e-29	0.346943	0.924	0.536	4.77063e-25	7	ANXA2
1.6702e-29	0.43893	0.908	0.554	5.88245e-25	7	CD84
2.37961e-29	0.338818	0.699	0.326	8.381e-25	7	TMEM154
7.19738e-29	0.430795	0.975	0.703	2.53492e-24	7	DIAPH1
2.01056e-28	0.378225	0.905	0.54	7.08121e-24	7	FBXW7
2.18516e-28	0.444138	0.959	0.701	7.69615e-24	7	INPP4A
2.92726e-28	0.459466	0.975	0.73	1.03098e-23	7	PIK3R5
2.64169e-27	0.394157	1	0.918	9.30405e-23	7	KLF12
3.27345e-27	0.347317	0.772	0.397	1.15291e-22	7	FOXN2
4.02049e-27	0.352559	1	0.968	1.41602e-22	7	PITPNC1
4.75762e-26	0.298624	0.747	0.362	1.67563e-21	7	MADD
4.87189e-26	0.363088	0.997	0.789	1.71588e-21	7	IQGAP2
6.12053e-26	0.272814	0.687	0.328	2.15565e-21	7	BMP2K
1.32775e-25	0.283236	0.791	0.387	4.67635e-21	7	MYO1G
2.54056e-25	0.265892	0.595	0.272	8.94786e-21	7	PPP1R12B
1.33094e-24	0.276059	0.69	0.326	4.68756e-20	7	LPIN1
1.83747e-24	0.385025	0.93	0.596	6.47158e-20	7	PRKCA
2.08643e-24	0.290886	0.699	0.34	7.3484e-20	7	CEBPB
2.80408e-24	0.26884	0.674	0.321	9.87596e-20	7	SRM
3.22913e-24	0.311402	0.848	0.484	1.1373e-19	7	AP1S2
5.36153e-24	0.402961	0.965	0.705	1.88833e-19	7	NR3C1
5.5794e-24	0.320507	0.943	0.624	1.96507e-19	7	CD44
1.06938e-23	0.371591	0.832	0.473	3.76637e-19	7	MAPRE2
2.61778e-23	0.329078	0.832	0.479	9.21984e-19	7	ID2
2.98286e-23	0.328249	0.87	0.514	1.05056e-18	7	EFCC1
1.55022e-22	0.346894	0.709	0.385	5.45987e-18	7	LOC720132
1.85015e-22	0.306734	0.987	0.866	6.51624e-18	7	MYL6
2.25482e-22	0.287065	0.839	0.483	7.94149e-18	7	CLEC2B
2.55404e-22	0.352035	0.44	0.199	8.99534e-18	7	APBB2
2.63688e-22	0.255264	0.677	0.337	9.28708e-18	7	GNAQ
3.78198e-22	0.345516	1	0.894	1.33201e-17	7	PRKCH
5.71602e-22	0.320496	1	0.951	2.01318e-17	7	FNBP1
1.1307e-21	0.281277	0.987	0.84	3.98232e-17	7	EMP3
1.22912e-21	0.328248	0.937	0.658	4.32896e-17	7	KLF3
1.34111e-21	0.301658	0.949	0.626	4.72341e-17	7	GLIPR2
1.90184e-21	0.363521	0.937	0.608	6.69827e-17	7	LOC106992273
1.99969e-21	0.27125	0.937	0.62	7.04291e-17	7	UCP2
2.23117e-21	0.285144	0.807	0.467	7.85819e-17	7	BST2
2.81792e-21	0.251346	0.759	0.399	9.92472e-17	7	IRF1
3.61428e-21	0.257529	0.627	0.304	1.27295e-16	7	LRMP
3.79805e-21	0.324696	0.801	0.44	1.33767e-16	7	FAR1
4.31891e-21	0.291042	0.772	0.416	1.52112e-16	7	GRK5
6.46122e-21	0.285428	0.693	0.364	2.27564e-16	7	CMIP
1.5623e-20	0.309972	0.994	0.966	5.50242e-16	7	LOC707383
1.81675e-20	0.27703	0.772	0.434	6.39861e-16	7	DENND1B
2.40849e-20	0.27168	0.699	0.365	8.48269e-16	7	PDZD8
1.56183e-19	0.264948	0.709	0.378	5.50075e-15	7	ANTXR2
2.41911e-19	0.294656	0.867	0.513	8.52011e-15	7	ATXN7L1
2.87764e-19	0.275923	0.763	0.42	1.01351e-14	7	NCOA1
3.67519e-19	0.287277	0.908	0.561	1.2944e-14	7	INPP5D
6.55092e-19	0.320336	0.949	0.674	2.30723e-14	7	HERC1
7.34767e-19	0.264614	0.943	0.61	2.58785e-14	7	KLF6
1.45496e-18	0.361479	0.934	0.674	5.12438e-14	7	TC2N
1.55567e-18	0.28452	0.959	0.721	5.47906e-14	7	PICALM
9.98757e-18	0.284061	0.94	0.673	3.51762e-13	7	STK10
1.43911e-17	0.297587	0.899	0.62	5.06853e-13	7	EPS15
1.63835e-17	0.286652	0.968	0.753	5.77027e-13	7	DOCK2
1.65055e-17	0.258614	0.687	0.373	5.81325e-13	7	MAP2K6
2.89829e-17	0.255633	0.63	0.336	1.02078e-12	7	LOC708994
5.94692e-17	0.278849	0.899	0.567	2.0945e-12	7	RNF149
7.01289e-17	0.289487	0.864	0.569	2.46994e-12	7	ST8SIA4
8.92158e-17	0.271894	0.801	0.494	3.14218e-12	7	LPP
4.25503e-16	0.268559	0.93	0.645	1.49862e-11	7	ZFP36L2
1.21339e-15	0.285724	0.997	0.905	4.27356e-11	7	MBP
1.36094e-15	0.251964	0.905	0.632	4.79321e-11	7	RAPGEF1
1.57562e-15	0.292384	0.927	0.683	5.54932e-11	7	TRPS1
2.29935e-15	0.250062	0.991	0.946	8.09831e-11	7	SERF2
7.41852e-15	0.270434	0.801	0.488	2.6128e-10	7	RFX7
8.44714e-15	0.258336	0.848	0.538	2.97508e-10	7	SLC4A7
1.21264e-14	0.296524	0.965	0.693	4.27093e-10	7	YWHAZ
3.23155e-14	0.322726	0.604	0.369	1.13815e-09	7	LOC106995452
1.46891e-13	0.497978	0.614	0.394	5.17352e-09	7	LOC100426197
1.94521e-13	0.25744	0.82	0.524	6.85102e-09	7	ASCC3
2.49846e-13	0.322469	0.994	0.924	8.79956e-09	7	FKBP5
1.33325e-12	0.254428	0.826	0.543	4.69569e-08	7	DIPK1A
2.68438e-12	0.268923	0.949	0.722	9.45439e-08	7	ARL15
5.10435e-12	0.403426	0.835	0.699	1.79775e-07	7	LOC114669738
6.01334e-12	0.440243	0.693	0.502	2.1179e-07	7	LOC114677644
2.8833e-10	0.26242	0.905	0.718	1.0155e-05	7	LOC719702
5.47409e-09	0.299884	0.788	0.571	0.000192797	7	LOC701976
2.216e-08	0.517965	0.44	0.283	0.000780474	7	LOC693820
