# Supplementary material for: T cell-mediated SIV dissemination into the CNS: a single-cell transcriptomic analysis
Source: Research Square preprint supplement (doi:10.21203/rs.3.rs-6537361/v1), 2025-05-09
Supplement: Supplementary file 10 [file 8f84d0b0740f350c4c59f91a.xlsx]

## Sheet: CD4+ CTLs
	ID	Description	setSize	enrichmentScore	NES	pvalue	p.adjust	qvalue	rank	leading_edge	core_enrichment
GO:0006412	GO:0006412	translation	148	-0.600504	-3.48643	1.03234e-25	7.63928e-24	2.87967e-24	254	tags=47%, list=11%, signal=45%	RPS5/RPS15/RPL39/GAPDH/EEF1B2/RPS4Y1/RPS18/EIF4A1/SRP9/RPS16/RPS9/RPS7/ZFP36L2/RPS20/RPL18/RPLP1/UBA52/RPL8/RPL12/RPL10/RPS4X/RPL10A/FAU/RPS23/RPS8/RPL41/RPL21/RPL4/RPL15/EIF3F/RPL22/RPS19/RPL23A/RPL5/RPS13/RPL30/RPS2/RPL6/LOC712274/RPS12/EEF1G/RPL27/RPL3/RPL34/RPSA/RPL11/RPL9/RPL17/LOC703455/RPL28/RPL19/RPL36/LOC719242/RPL38/RPS28/RPS21/RPS29/LOC693820/RPS27/RPS24/RPL14/RPL35A/RPL36AL/RPL26/RPL3…
GO:0043043	GO:0043043	peptide biosynthetic process	148	-0.600504	-3.48643	1.03234e-25	7.63928e-24	2.87967e-24	254	tags=47%, list=11%, signal=45%	RPS5/RPS15/RPL39/GAPDH/EEF1B2/RPS4Y1/RPS18/EIF4A1/SRP9/RPS16/RPS9/RPS7/ZFP36L2/RPS20/RPL18/RPLP1/UBA52/RPL8/RPL12/RPL10/RPS4X/RPL10A/FAU/RPS23/RPS8/RPL41/RPL21/RPL4/RPL15/EIF3F/RPL22/RPS19/RPL23A/RPL5/RPS13/RPL30/RPS2/RPL6/LOC712274/RPS12/EEF1G/RPL27/RPL3/RPL34/RPSA/RPL11/RPL9/RPL17/LOC703455/RPL28/RPL19/RPL36/LOC719242/RPL38/RPS28/RPS21/RPS29/LOC693820/RPS27/RPS24/RPL14/RPL35A/RPL36AL/RPL26/RPL3…
GO:0043604	GO:0043604	amide biosynthetic process	152	-0.582487	-3.38261	3.26656e-24	1.6115e-22	6.07465e-23	254	tags=46%, list=11%, signal=44%	RPS5/RPS15/RPL39/GAPDH/EEF1B2/RPS4Y1/RPS18/EIF4A1/SRP9/RPS16/RPS9/RPS7/ZFP36L2/RPS20/RPL18/RPLP1/UBA52/RPL8/RPL12/RPL10/RPS4X/RPL10A/FAU/RPS23/RPS8/RPL41/RPL21/RPL4/RPL15/EIF3F/RPL22/RPS19/RPL23A/RPL5/RPS13/RPL30/RPS2/RPL6/LOC712274/RPS12/EEF1G/RPL27/RPL3/RPL34/RPSA/RPL11/RPL9/RPL17/LOC703455/RPL28/RPL19/RPL36/LOC719242/RPL38/RPS28/RPS21/RPS29/LOC693820/RPS27/RPS24/RPL14/RPL35A/RPL36AL/RPL26/RPL3…
GO:0006518	GO:0006518	peptide metabolic process	160	-0.571752	-3.35633	1.99901e-23	7.39633e-22	2.78809e-22	254	tags=44%, list=11%, signal=42%	RPS5/RPS15/RPL39/GAPDH/EEF1B2/RPS4Y1/RPS18/EIF4A1/SRP9/RPS16/RPS9/RPS7/ZFP36L2/RPS20/RPL18/RPLP1/UBA52/RPL8/RPL12/RPL10/RPS4X/RPL10A/FAU/RPS23/RPS8/RPL41/RPL21/RPL4/RPL15/EIF3F/RPL22/RPS19/RPL23A/RPL5/RPS13/RPL30/RPS2/RPL6/LOC712274/RPS12/EEF1G/RPL27/RPL3/RPL34/RPSA/RPL11/RPL9/RPL17/LOC703455/RPL28/RPL19/RPL36/LOC719242/RPL38/RPS28/RPS21/RPS29/LOC693820/RPS27/RPS24/RPL14/RPL35A/RPL36AL/RPL26/RPL3…
GO:1901566	GO:1901566	organonitrogen compound biosynthetic process	208	-0.509257	-3.1531	3.32968e-21	9.85586e-20	3.71523e-20	319	tags=43%, list=14%, signal=41%	MRPS12/RPL29/RSL24D1/ITM2B/RPS27L/RPLP2/KRTCAP2/RPL13A/ATP5MC3/RPS5/RPS15/RPL39/ATP5MF/GAPDH/ATP5F1D/EEF1B2/RPS4Y1/DPM3/RPS18/EIF4A1/SRP9/OSTC/ATP5PD/RPS16/RPS9/RPS7/ZFP36L2/RPS20/RPL18/RPLP1/UBA52/RPL8/RPL12/RPL10/RPS4X/RPL10A/FAU/RPS23/TGFB1/RPS8/RPL41/RPL21/RPL4/RPL15/EIF3F/RPL22/RPS19/RPL23A/RPL5/RPS13/RPL30/RPS2/RPL6/ATP5MG/LOC712274/RPS12/ATP5F1E/ATP5ME/EEF1G/RPL27/RPL3/RPL34/RPSA/RPL11/RPL…
GO:0043603	GO:0043603	amide metabolic process	173	-0.535312	-3.17354	9.47552e-21	2.33729e-19	8.81057e-20	254	tags=41%, list=11%, signal=39%	RPS5/RPS15/RPL39/GAPDH/EEF1B2/RPS4Y1/RPS18/EIF4A1/SRP9/RPS16/RPS9/RPS7/ZFP36L2/RPS20/RPL18/RPLP1/UBA52/RPL8/RPL12/RPL10/RPS4X/RPL10A/FAU/RPS23/RPS8/RPL41/RPL21/RPL4/RPL15/EIF3F/RPL22/RPS19/RPL23A/RPL5/RPS13/RPL30/RPS2/RPL6/LOC712274/RPS12/EEF1G/RPL27/RPL3/RPL34/RPSA/RPL11/RPL9/RPL17/LOC703455/RPL28/RPL19/RPL36/LOC719242/RPL38/RPS28/RPS21/RPS29/LOC693820/RPS27/RPS24/RPL14/RPL35A/RPL36AL/RPL26/RPL3…
GO:0044271	GO:0044271	cellular nitrogen compound biosynthetic process	403	-0.299382	-2.02755	1.45791e-08	3.08245e-07	1.16195e-07	254	tags=21%, list=11%, signal=23%	RPS5/RPS15/PFDN5/RPL39/ATP5MF/GAPDH/ATP5F1D/EEF1B2/RPS4Y1/RPS18/POLR2L/EIF4A1/SRP9/MAF1/ATP5PD/RPS16/RPS9/RPS7/ZFP36L2/HMGB1/RPS20/RPL18/RPLP1/TXNIP/UBA52/HINT1/RPL8/RPL12/RPL10/CEBPB/RPS4X/RPL10A/FAU/RPS23/TGFB1/RPS8/RPL41/RPL21/RPL4/RPL15/EIF3F/RPL22/RPS19/RPL23A/RPL5/RPS13/RPL30/RPS2/RPL6/ATP5MG/LOC712274/RPS12/ATP5F1E/ATP5ME/EEF1G/RPL27/RPL3/RPL34/RPSA/RPL11/RPL9/RPL17/LOC703455/RPL28/RPL19/L…
GO:0080090	GO:0080090	regulation of primary metabolic process	402	0.266396	1.85304	2.98973e-07	5.53099e-06	2.08494e-06	949	tags=56%, list=43%, signal=39%	FOSB/FOS/FBXW7/ZFP36/ZEB2/ARRDC3/RHOBTB3/PRKCA/BTG2/DUSP1/UBASH3B/NR4A2/ZFP36L1/PPP1R15A/SMAD3/SLC38A2/DNAJA1/CCNL1/PTBP3/GNAQ/ELOVL5/KLF6/OSBPL8/YWHAZ/KANSL1/PRKCH/PRKCB/BHLHE40/FOXO1/PRR5L/ZNF644/ESCO1/JUN/FER/ID2/BCLAF1/BABAM2/ITPKB/CDK17/NCOA2/PELI1/RUNX1/ABI1/GSK3B/IKZF3/IL15/TRA2A/TIPARP/KLF12/PMAIP1/JMY/ETV6/ROCK1/ELF1/ZHX2/NR3C1/UBQLN1/PPP1R10/YTHDF3/SMG6/HSP90AA1/CTNNB1/MAPKAP1/XPO1/HNRN…
GO:0051171	GO:0051171	regulation of nitrogen compound metabolic process	393	0.257679	1.7968	3.01468e-06	4.95748e-05	1.86875e-05	949	tags=55%, list=43%, signal=39%	FOSB/FOS/FBXW7/ZFP36/ZEB2/ARRDC3/RHOBTB3/BTG2/DUSP1/UBASH3B/NR4A2/ZFP36L1/PPP1R15A/SMAD3/SLC38A2/DNAJA1/CCNL1/PTBP3/GNAQ/KLF6/OSBPL8/YWHAZ/KANSL1/PRKCB/BHLHE40/FOXO1/PRR5L/ZNF644/ESCO1/JUN/FER/ID2/BCLAF1/BABAM2/ITPKB/CDK17/NCOA2/PELI1/RUNX1/ABI1/GSK3B/IKZF3/IL15/TRA2A/TIPARP/KLF12/PMAIP1/JMY/ETV6/ROCK1/ELF1/ZHX2/NR3C1/UBQLN1/PPP1R10/YTHDF3/SMG6/HSP90AA1/CTNNB1/MAPKAP1/XPO1/HNRNPAB/MRTFA/FXR1/TOB1…
GO:0060255	GO:0060255	regulation of macromolecule metabolic process	433	0.24392	1.70588	1.19953e-05	0.000177531	6.69214e-05	949	tags=54%, list=43%, signal=38%	FOSB/FOS/FBXW7/ZFP36/ZEB2/ARRDC3/RHOBTB3/CD226/BTG2/PDE4D/DUSP1/UBASH3B/NR4A2/ZFP36L1/PPP1R15A/SMAD3/SLC38A2/DNAJA1/CCNL1/PTBP3/GNAQ/KLF6/OSBPL8/YWHAZ/KANSL1/AFF1/PRKCB/BHLHE40/TOP1/FOXO1/PRR5L/ZNF644/ESCO1/JUN/FER/ID2/BCLAF1/BABAM2/ITPKB/CDK17/NCOA2/PELI1/RUNX1/ABI1/GSK3B/IKZF3/IL15/TRA2A/TIPARP/KLF12/PMAIP1/JMY/ETV6/ROCK1/ELF1/ZHX2/NR3C1/UBQLN1/PPP1R10/YTHDF3/SMG6/FUT8/HSP90AA1/CTNNB1/MAPKAP1/X…
GO:0007154	GO:0007154	cell communication	387	0.248039	1.7341	1.42282e-05	0.000191434	7.21623e-05	567	tags=33%, list=26%, signal=30%	KLRD1/FOS/RASGEF1B/MAPRE2/FBXW7/ZFP36/GNG2/RGS1/CHST11/SNRK/ARRDC3/PRKCA/ARHGAP32/CD226/CCL4L1/PDE4D/DUSP1/RHOH/UBASH3B/NR4A2/SMAD3/DNAJA1/BCL2A1/GNAQ/OSBPL8/YWHAZ/OXSR1/PRKCB/RASA2/LOC100426632/FOXO1/MCTP2/PRR5L/JAK1/JUN/FER/BTBD9/BCLAF1/BABAM2/ITPKB/SRGAP2/PELI1/MAP3K2/RASGRP1/GNA13/GSK3B/XPR1/LOC100430627/IL15/ELMO1/TIPARP/PMAIP1/JMY/MYO6/DOCK11/RELL1/CHN2/ROCK1/GLUD1/MCL1/NR3C1/UBQLN1/GNB1/PP…
GO:0023052	GO:0023052	signaling	381	0.248447	1.73115	2.9735e-05	0.000366732	0.000138242	567	tags=33%, list=26%, signal=29%	KLRD1/FOS/RASGEF1B/MAPRE2/FBXW7/ZFP36/GNG2/RGS1/CHST11/SNRK/ARRDC3/PRKCA/ARHGAP32/CD226/CCL4L1/PDE4D/DUSP1/RHOH/UBASH3B/NR4A2/SMAD3/DNAJA1/BCL2A1/GNAQ/OSBPL8/YWHAZ/OXSR1/PRKCB/RASA2/LOC100426632/FOXO1/MCTP2/PRR5L/JAK1/JUN/FER/BTBD9/BCLAF1/BABAM2/ITPKB/SRGAP2/PELI1/MAP3K2/RASGRP1/GNA13/GSK3B/LOC100430627/IL15/ELMO1/TIPARP/PMAIP1/JMY/MYO6/DOCK11/RELL1/CHN2/ROCK1/GLUD1/MCL1/NR3C1/UBQLN1/GNB1/PPP1R10…
GO:0006468	GO:0006468	protein phosphorylation	141	0.324618	1.95252	3.5248e-05	0.000385296	0.00014524	288	tags=26%, list=13%, signal=24%	FBXW7/SNRK/PRKCA/DUSP1/UBASH3B/DNAJA1/GNAQ/OSBPL8/OXSR1/SIK3/FYN/PRKCH/PRKCB/TOP1/DYRK1A/ST3GAL1/PRR5L/TNIK/JAK1/JUN/FER/ITPKB/CDK17/MAP3K2/ABI1/GSK3B/IL15/CLK1/ROCK1/HIPK1/SIK1/LOC106992273/MAP4K4/HSP90AA1/CSNK1G3/MAPKAP1
GO:0019219	GO:0019219	regulation of nucleobase-containing compound metabolic process	281	0.265072	1.78215	3.64469e-05	0.000385296	0.00014524	949	tags=56%, list=43%, signal=37%	FOSB/FOS/ZFP36/ZEB2/BTG2/NR4A2/ZFP36L1/SMAD3/SLC38A2/CCNL1/PTBP3/KLF6/YWHAZ/PRKCB/BHLHE40/FOXO1/PRR5L/ZNF644/ESCO1/JUN/FER/ID2/BCLAF1/BABAM2/CDK17/NCOA2/PELI1/RUNX1/IKZF3/TRA2A/KLF12/JMY/ETV6/ROCK1/ELF1/ZHX2/NR3C1/PPP1R10/YTHDF3/SMG6/HSP90AA1/CTNNB1/HNRNPAB/MRTFA/TOB1/ZNF148/ZBTB38/NFATC2/MSL2/PDS5A/L3MBTL3/SIRT1/SERTAD1/HNRNPU/SNIP1/BATF/RPS6KA5/PUM1/MBNL1/KDM3A/ZZZ3/FAM168A/NFKBIB/MBNL3/GATAD2A…
GO:0035556	GO:0035556	intracellular signal transduction	233	0.278515	1.81159	5.31989e-05	0.000453833	0.000171075	395	tags=27%, list=18%, signal=25%	FOS/RASGEF1B/MAPRE2/FBXW7/ZFP36/SNRK/ARRDC3/PRKCA/ARHGAP32/CCL4L1/PDE4D/DUSP1/RHOH/SMAD3/DNAJA1/BCL2A1/OSBPL8/YWHAZ/OXSR1/PRKCB/RASA2/LOC100426632/FOXO1/PRR5L/JAK1/JUN/BCLAF1/BABAM2/ITPKB/PELI1/MAP3K2/RASGRP1/GNA13/GSK3B/LOC100430627/ELMO1/JMY/MYO6/DOCK11/RELL1/CHN2/ROCK1/MCL1/UBQLN1/PPP1R10/MAP4K4/ARHGEF3/HSP90AA1/CTNNB1/MAPKAP1/JAK2/TOB1/IVNS1ABP/GBF1/NFATC2/PTTG1IP/TANK/ZFAND6/SIRT1/SNIP1/RPS6…
GO:0043412	GO:0043412	macromolecule modification	319	0.249098	1.69312	4.8318e-05	0.000453833	0.000171075	1041	tags=61%, list=47%, signal=38%	FBXW7/SNRK/ARRDC3/PRKCA/BTG2/DUSP1/UBASH3B/PPP1R15A/NEDD4L/DNAJA1/GNAQ/OSBPL8/OXSR1/SIK3/KANSL1/FYN/PRKCH/PRKCB/TOP1/DYRK1A/ST3GAL1/PRR5L/TNIK/ESCO1/UBR5/JAK1/JUN/FER/ITPKB/C1GALT1/CDK17/PELI1/MAP3K2/KMT2E/ABI1/GSK3B/UBE2H/IL15/CLK1/ROCK1/OGA/HIPK1/UBQLN1/SIK1/LOC106992273/MAP4K4/GALNT10/FUT8/HSP90AA1/ZRANB1/CSNK1G3/CTNNB1/MAPKAP1/HNRNPAB/MINDY3/ITCH/USP3/JAK2/IVNS1ABP/MGAT5/RPS6KB1/MSL2/PTP4A1/P…
GO:0007165	GO:0007165	signal transduction	364	0.24256	1.67295	5.51959e-05	0.000453833	0.000171075	413	tags=25%, list=19%, signal=24%	KLRD1/FOS/RASGEF1B/MAPRE2/FBXW7/ZFP36/GNG2/RGS1/CHST11/SNRK/ARRDC3/PRKCA/ARHGAP32/CD226/CCL4L1/PDE4D/DUSP1/RHOH/UBASH3B/NR4A2/SMAD3/DNAJA1/BCL2A1/GNAQ/OSBPL8/YWHAZ/OXSR1/PRKCB/RASA2/LOC100426632/FOXO1/PRR5L/JAK1/JUN/FER/BCLAF1/BABAM2/ITPKB/SRGAP2/PELI1/MAP3K2/RASGRP1/GNA13/GSK3B/LOC100430627/IL15/ELMO1/TIPARP/PMAIP1/JMY/MYO6/DOCK11/RELL1/CHN2/ROCK1/MCL1/UBQLN1/GNB1/PPP1R10/YTHDF3/ITGA4/MAP4K4/ARH…
GO:0019222	GO:0019222	regulation of metabolic process	462	0.230719	1.63523	5.03155e-05	0.000453833	0.000171075	949	tags=53%, list=43%, signal=39%	FOSB/FOS/FBXW7/ZFP36/ZEB2/ARRDC3/RHOBTB3/PRKCA/CD226/BTG2/PDE4D/DUSP1/UBASH3B/NR4A2/ZFP36L1/PPP1R15A/SMAD3/SLC38A2/DNAJA1/CCNL1/PTBP3/GNAQ/ELOVL5/KLF6/OSBPL8/YWHAZ/KANSL1/PRKCH/AFF1/PRKCB/BHLHE40/TOP1/FOXO1/PRR5L/ZNF644/ESCO1/JUN/FER/ID2/BCLAF1/BABAM2/ITPKB/CDK17/NCOA2/PELI1/RUNX1/ABI1/GSK3B/IKZF3/IL15/TRA2A/TIPARP/KLF12/PMAIP1/JMY/ETV6/ROCK1/ELF1/ZHX2/MCL1/NR3C1/UBQLN1/PPP1R10/YTHDF3/SMG6/FUT8/H…
GO:0030154	GO:0030154	cell differentiation	209	0.282041	1.82353	8.22626e-05	0.000608743	0.000229469	695	tags=43%, list=31%, signal=33%	FOS/FBXW7/ZFP36/CHST11/BTG2/DDX3Y/PDE4D/RHOH/UBASH3B/NR4A2/SMAD3/PTBP3/OSBPL8/YWHAZ/PRKCH/NKG2D/ST3GAL1/JAK1/JUN/LRRC8C/ID2/ITPKB/SRGAP2/C1GALT1/KMT2E/RUNX1/VCL/GSK3B/IKZF3/RERE/TIPARP/MYO6/DOCK11/ROCK1/ZHX2/MCL1/NR3C1/WDR7/ITGA4/MAP4K4/HSP90AA1/AP1G1/CHSY1/CTNNB1/FXR1/TOB1/NDEL1/ZNF800/NFATC2/PSME4/L3MBTL3/SIRT1/HNRNPU/PUM1/PLEK/KDM3A/MBNL3/B4GALT1/CDC73/TPD52/KDM6A/IST1/CDK12/MEF2A/SMYD3/ACSL4/…
GO:0036211	GO:0036211	protein modification process	309	0.252597	1.71492	8.19856e-05	0.000608743	0.000229469	1041	tags=61%, list=47%, signal=38%	FBXW7/SNRK/ARRDC3/PRKCA/BTG2/DUSP1/UBASH3B/PPP1R15A/NEDD4L/DNAJA1/GNAQ/OSBPL8/OXSR1/SIK3/KANSL1/FYN/PRKCH/PRKCB/TOP1/DYRK1A/ST3GAL1/PRR5L/TNIK/ESCO1/UBR5/JAK1/JUN/FER/ITPKB/C1GALT1/CDK17/PELI1/MAP3K2/ABI1/GSK3B/UBE2H/IL15/CLK1/ROCK1/OGA/HIPK1/UBQLN1/SIK1/LOC106992273/MAP4K4/GALNT10/FUT8/HSP90AA1/ZRANB1/CSNK1G3/CTNNB1/MAPKAP1/MINDY3/ITCH/USP3/JAK2/IVNS1ABP/MGAT5/RPS6KB1/MSL2/PTP4A1/PTTG1IP/PPP2R5C…
GO:0048869	GO:0048869	cellular developmental process	210	0.280247	1.81488	0.000120998	0.000778597	0.000293497	695	tags=43%, list=31%, signal=33%	FOS/FBXW7/ZFP36/CHST11/BTG2/DDX3Y/PDE4D/RHOH/UBASH3B/NR4A2/SMAD3/PTBP3/OSBPL8/YWHAZ/PRKCH/NKG2D/ST3GAL1/JAK1/JUN/LRRC8C/ID2/ITPKB/SRGAP2/C1GALT1/KMT2E/RUNX1/VCL/GSK3B/IKZF3/RERE/TIPARP/MYO6/DOCK11/ROCK1/ZHX2/MCL1/NR3C1/WDR7/ITGA4/MAP4K4/HSP90AA1/AP1G1/CHSY1/CTNNB1/FXR1/TOB1/NDEL1/ZNF800/NFATC2/PSME4/L3MBTL3/SIRT1/HNRNPU/PUM1/PLEK/KDM3A/MBNL3/B4GALT1/CDC73/TPD52/KDM6A/IST1/CDK12/MEF2A/SMYD3/ACSL4/…
GO:0044085	GO:0044085	cellular component biogenesis	216	-0.289643	-1.80885	0.000116	0.000778597	0.000293497	488	tags=35%, list=22%, signal=30%	EIF3E/NDUFA2/GABARAP/NPM1/CCT3/CLTA/ARPC4/RCC1/RBIS/VASP/EIF3K/C1QBP/CIAO2A/SNRPF/ARPC5/RHOG/LGALS3/GABARAPL2/HIGD2A/ARPC3/STOML2/TAF10/BRK1/VPS28/NDUFA1/NDUFB7/SET/RSL24D1/COX19/SUB1/HSPA8/RPS27L/SNRPG/SNRPB/NDUFB8/NSA2/ARPC2/RPS5/RPS15/PFDN5/ATP5F1D/RAC2/RPS16/RPS9/RPS7/HMGB1/ACTG1/PET100/RPL10/RPS4X/TGFB1/RPS8/RPL7A/EIF3F/RPL23A/RPL5/RPS13/RPL6/LIMD2/SSNA1/LOC717879/SAMHD1/RPL27/RPSA/RPL7/RPLP…
GO:0048518	GO:0048518	positive regulation of biological process	395	0.233593	1.63021	0.000113532	0.000778597	0.000293497	714	tags=39%, list=32%, signal=33%	KLRD1/FOS/MAPRE2/FBXW7/ZFP36/ARRDC3/PRKCA/CD226/BTG2/CCL4L1/PDE4D/RHOH/ZFP36L1/PPP1R15A/SMAD3/SLC38A2/DNAJA1/BCL2A1/ELOVL5/OSBPL8/OXSR1/KANSL1/PRKCB/LOC100426632/NKG2D/STIM1/FOXO1/PRR5L/JAK1/JUN/FER/BCLAF1/BABAM2/ITPKB/ENPP4/NCOA2/PELI1/KMT2E/RUNX1/ABI1/GSK3B/STX7/LOC100430627/IL15/TRA2A/TIPARP/KLF12/PMAIP1/JMY/DOCK11/RELL1/ROCK1/GLUD1/MTPN/MCL1/NR3C1/UBQLN1/PPP1R10/RSU1/YTHDF3/ITGA4/ARHGEF3/HSP9…
GO:0031323	GO:0031323	regulation of cellular metabolic process	416	0.23065	1.6078	0.000128996	0.000795476	0.000299859	949	tags=54%, list=43%, signal=38%	FOSB/FOS/FBXW7/ZFP36/ZEB2/CD226/BTG2/PDE4D/DUSP1/UBASH3B/NR4A2/ZFP36L1/PPP1R15A/SMAD3/SLC38A2/DNAJA1/CCNL1/PTBP3/GNAQ/ELOVL5/KLF6/OSBPL8/YWHAZ/AFF1/PRKCB/BHLHE40/TOP1/FOXO1/PRR5L/ZNF644/ESCO1/JUN/FER/ID2/BCLAF1/BABAM2/ITPKB/CDK17/NCOA2/PELI1/RUNX1/ABI1/GSK3B/IKZF3/IL15/TRA2A/TIPARP/KLF12/JMY/ETV6/ROCK1/ELF1/ZHX2/MCL1/NR3C1/PPP1R10/YTHDF3/SMG6/FUT8/HSP90AA1/CTNNB1/MAPKAP1/HNRNPAB/MRTFA/FXR1/TOB1/M…
GO:0051252	GO:0051252	regulation of RNA metabolic process	256	0.260487	1.72107	0.00014533	0.000860352	0.000324315	949	tags=56%, list=43%, signal=36%	FOSB/FOS/ZFP36/ZEB2/BTG2/NR4A2/ZFP36L1/SMAD3/SLC38A2/CCNL1/PTBP3/KLF6/YWHAZ/PRKCB/BHLHE40/FOXO1/PRR5L/ZNF644/JUN/FER/ID2/BCLAF1/CDK17/NCOA2/PELI1/RUNX1/IKZF3/TRA2A/KLF12/JMY/ETV6/ROCK1/ELF1/ZHX2/NR3C1/YTHDF3/CTNNB1/HNRNPAB/MRTFA/TOB1/ZNF148/ZBTB38/NFATC2/MSL2/L3MBTL3/SIRT1/SERTAD1/HNRNPU/SNIP1/BATF/RPS6KA5/PUM1/MBNL1/KDM3A/ZZZ3/NFKBIB/MBNL3/GATAD2A/QRICH1/CDC73/TFDP2/NFX1/GATAD2B/MED13L/PSPC1/CDK…
GO:0048523	GO:0048523	negative regulation of cellular process	323	0.237219	1.6211	0.000361408	0.00199105	0.000750539	522	tags=30%, list=24%, signal=27%	KLRD1/FBXW7/ZFP36/ZEB2/CHST11/ARRDC3/PRKCA/BTG2/PDE4D/DUSP1/RHOH/UBASH3B/SKAP2/NR4A2/ZFP36L1/PPP1R15A/SMAD3/DNAJA1/BCL2A1/GNAQ/OSBPL8/YWHAZ/OXSR1/PRKCB/RASA2/FOXO1/ST3GAL1/PRR5L/JUN/FER/ID2/BCLAF1/BABAM2/ITPKB/SRGAP2/PELI1/GSK3B/TIPARP/ROCK1/MTPN/ZHX2/MCL1/UBQLN1/LRCH1/PPP1R10/YTHDF3/SMG6/CTNNB1/MAPKAP1/HNRNPAB/TOB1/IVNS1ABP/MGAT5/ZNF148/ZBTB38/NFATC2/CLTC/PDS5A/PTTG1IP/AVEN/TANK/L3MBTL3/ZFAND6/S…
GO:0051716	GO:0051716	cellular response to stimulus	456	0.219596	1.55656	0.000363233	0.00199105	0.000750539	417	tags=23%, list=19%, signal=24%	KLRD1/FOSB/FOS/RASGEF1B/MAPRE2/FBXW7/ZFP36/GNG2/RGS1/CHST11/SNRK/ARRDC3/PRKCA/ARHGAP32/CD226/BTG2/CCL4L1/PDE4D/DUSP1/RHOH/UBASH3B/NR4A2/PPP1R15A/SMAD3/SLC38A2/DNAJA1/BCL2A1/GNAQ/OSBPL8/YWHAZ/OXSR1/PRKCB/RASA2/LOC100426632/IMMP2L/FOXO1/PRR5L/JAK1/JUN/FER/BCLAF1/BABAM2/ITPKB/SRGAP2/PELI1/MAP3K2/RASGRP1/GNA13/GSK3B/XPR1/LOC100430627/IL15/ELMO1/TIPARP/PMAIP1/JMY/MYO6/DOCK11/RELL1/CHN2/ROCK1/MCL1/NR3C…
GO:0009889	GO:0009889	regulation of biosynthetic process	353	0.231799	1.59887	0.000410064	0.00202298	0.000762575	949	tags=54%, list=43%, signal=37%	FOSB/FOS/FBXW7/ZFP36/ZEB2/CD226/BTG2/PDE4D/NR4A2/ZFP36L1/PPP1R15A/SMAD3/SLC38A2/CCNL1/PTBP3/ELOVL5/KLF6/YWHAZ/AFF1/PRKCB/BHLHE40/TOP1/FOXO1/PRR5L/ZNF644/JUN/FER/ID2/BCLAF1/CDK17/NCOA2/PELI1/RUNX1/GSK3B/IKZF3/IL15/TRA2A/TIPARP/KLF12/JMY/ETV6/ROCK1/ELF1/ZHX2/NR3C1/YTHDF3/SMG6/FUT8/HSP90AA1/CTNNB1/HNRNPAB/MRTFA/FXR1/TOB1/ZNF148/ZBTB38/NFATC2/CLTC/MSL2/TANK/L3MBTL3/SIRT1/SERTAD1/HNRNPU/SNIP1/BATF/EIF…
GO:0031326	GO:0031326	regulation of cellular biosynthetic process	353	0.231799	1.59887	0.000410064	0.00202298	0.000762575	949	tags=54%, list=43%, signal=37%	FOSB/FOS/FBXW7/ZFP36/ZEB2/CD226/BTG2/PDE4D/NR4A2/ZFP36L1/PPP1R15A/SMAD3/SLC38A2/CCNL1/PTBP3/ELOVL5/KLF6/YWHAZ/AFF1/PRKCB/BHLHE40/TOP1/FOXO1/PRR5L/ZNF644/JUN/FER/ID2/BCLAF1/CDK17/NCOA2/PELI1/RUNX1/GSK3B/IKZF3/IL15/TRA2A/TIPARP/KLF12/JMY/ETV6/ROCK1/ELF1/ZHX2/NR3C1/YTHDF3/SMG6/FUT8/HSP90AA1/CTNNB1/HNRNPAB/MRTFA/FXR1/TOB1/ZNF148/ZBTB38/NFATC2/CLTC/MSL2/TANK/L3MBTL3/SIRT1/SERTAD1/HNRNPU/SNIP1/BATF/EIF…
GO:0010468	GO:0010468	regulation of gene expression	347	0.231908	1.59204	0.000393908	0.00202298	0.000762575	949	tags=54%, list=43%, signal=37%	FOSB/FOS/FBXW7/ZFP36/ZEB2/CD226/BTG2/PDE4D/NR4A2/ZFP36L1/PPP1R15A/SMAD3/SLC38A2/CCNL1/PTBP3/KLF6/YWHAZ/AFF1/PRKCB/BHLHE40/TOP1/FOXO1/PRR5L/ZNF644/JUN/FER/ID2/BCLAF1/CDK17/NCOA2/PELI1/RUNX1/GSK3B/IKZF3/IL15/TRA2A/TIPARP/KLF12/JMY/ETV6/ROCK1/ELF1/ZHX2/NR3C1/YTHDF3/SMG6/FUT8/HSP90AA1/CTNNB1/HNRNPAB/MRTFA/FXR1/TOB1/ZNF148/ZBTB38/NFATC2/MSL2/TANK/L3MBTL3/SIRT1/SERTAD1/HNRNPU/SNIP1/BATF/EIF5/RPS6KA5/PU…
GO:0006357	GO:0006357	regulation of transcription by RNA polymerase II	148	0.293748	1.7762	0.000427412	0.00204055	0.000769197	876	tags=54%, list=39%, signal=35%	FOSB/FOS/ZFP36/ZEB2/NR4A2/SMAD3/CCNL1/KLF6/YWHAZ/PRKCB/FOXO1/ZNF644/JUN/ID2/BCLAF1/NCOA2/RUNX1/IKZF3/KLF12/ETV6/ELF1/ZHX2/NR3C1/CTNNB1/MRTFA/ZNF148/NFATC2/SIRT1/SERTAD1/HNRNPU/SNIP1/BATF/RPS6KA5/KDM3A/ZZZ3/GATAD2A/CDC73/NFX1/GATAD2B/MED13L/CDK12/MEF2A/SMARCA2/CCNH/SMYD3/ACTR2/TCF12/CBFB/NOTCH2/SP4/CREM/ELK3/ETS1/NR1D2/CNOT2/CCNT2/AMBRA1/NFATC3/RAD21/GPBP1/SSBP2/KAT7/MAX/HDAC4/MED1/TSC22D2/FOXJ3/N…
GO:0006366	GO:0006366	transcription by RNA polymerase II	154	0.295378	1.812	0.000444573	0.00205615	0.000775078	799	tags=49%, list=36%, signal=34%	FOSB/FOS/ZFP36/ZEB2/NR4A2/SMAD3/POLR2A/CCNL1/KLF6/YWHAZ/PRKCB/FOXO1/ZNF644/JUN/ID2/BCLAF1/NCOA2/RUNX1/IKZF3/KLF12/ETV6/ELF1/ZHX2/NR3C1/CTNNB1/MRTFA/ZNF148/NFATC2/SIRT1/SERTAD1/HNRNPU/SNIP1/BATF/RPS6KA5/KDM3A/ZZZ3/GATAD2A/CDC73/NFX1/GATAD2B/MED13L/CDK12/MEF2A/SMARCA2/CCNH/SMYD3/ACTR2/TCF12/CBFB/ATRX/DDX21/NOTCH2/SP4/CREM/ELK3/ETS1/NR1D2/CNOT2/CCNT2/AMBRA1/NFATC3/RAD21/GPBP1/SSBP2/KAT7/MAX/HDAC4/ME…
GO:0032501	GO:0032501	multicellular organismal process	299	0.240894	1.62518	0.000472609	0.00211958	0.000798988	475	tags=27%, list=21%, signal=25%	FOS/MAPRE2/FBXW7/ZFP36/CHST11/ARRDC3/RHOBTB3/PRKCA/CD226/BTG2/DDX3Y/PDE4D/DUSP1/RHOH/UBASH3B/NR4A2/SMAD3/DNAJA1/YWHAZ/PRKCB/IMMP2L/TOP1/ST3GAL1/JAK1/JUN/FER/BTBD9/ITPKB/SRGAP2/C1GALT1/ENPP4/PELI1/KMT2E/RUNX1/VCL/GSK3B/IKZF3/IL15/RERE/SLAMF1/TIPARP/MYO6/DOCK11/ROCK1/MTPN/ZHX2/NR3C1/GNB1/YTHDF3/ITGA4/MAP4K4/FUT8/HSP90AA1/AP1G1/CHSY1/CTNNB1/JAK2/TOB1/ZNF148/ZNF800/NFATC2/PSME4/SAT1/CLTC/TANK/L3MBTL3…
GO:0065009	GO:0065009	regulation of molecular function	171	0.275512	1.72956	0.000512923	0.00223272	0.000841639	269	tags=22%, list=12%, signal=21%	MAPRE2/FBXW7/ZFP36/RGS1/ARRDC3/CCL4L1/DUSP1/UBASH3B/NR4A2/PPP1R15A/SMAD3/DNAJA1/GNAQ/OSBPL8/OXSR1/PRKCB/RASA2/LOC100426632/STIM1/JUN/FER/ID2/SRGAP2/PELI1/ABI1/GSK3B/LOC100430627/PMAIP1/JMY/DOCK11/CHN2/ROCK1/UBQLN1/LRCH1/RSU1/ITGA4/HSP90AA1
GO:0032502	GO:0032502	developmental process	295	0.241954	1.63414	0.000547178	0.00231378	0.000872194	628	tags=36%, list=28%, signal=29%	FOS/FBXW7/ZFP36/CHST11/ARRDC3/RHOBTB3/PRKCA/BTG2/DDX3Y/PDE4D/DUSP1/RHOH/UBASH3B/NR4A2/SMAD3/DNAJA1/PTBP3/OSBPL8/YWHAZ/PRKCH/PRKCB/IMMP2L/NKG2D/TOP1/ST3GAL1/JAK1/JUN/LRRC8C/ID2/ITPKB/SRGAP2/C1GALT1/KMT2E/RUNX1/VCL/GSK3B/IKZF3/RERE/TIPARP/MYO6/DOCK11/ROCK1/ZHX2/MCL1/NR3C1/WDR7/GNB1/YTHDF3/ITGA4/MAP4K4/HSP90AA1/AP1G1/CHSY1/ZRANB1/CTNNB1/FRYL/FXR1/TOB1/NDEL1/ZNF800/NFATC2/PSME4/SAT1/L3MBTL3/SIRT1/HNR…
GO:0048522	GO:0048522	positive regulation of cellular process	357	0.225853	1.55734	0.000647882	0.00266351	0.00100403	408	tags=24%, list=18%, signal=23%	KLRD1/FOS/MAPRE2/FBXW7/ZFP36/ARRDC3/PRKCA/CD226/BTG2/CCL4L1/PDE4D/RHOH/ZFP36L1/PPP1R15A/SMAD3/SLC38A2/DNAJA1/BCL2A1/ELOVL5/OSBPL8/OXSR1/PRKCB/LOC100426632/NKG2D/STIM1/FOXO1/PRR5L/JAK1/JUN/FER/BCLAF1/BABAM2/ITPKB/NCOA2/PELI1/KMT2E/RUNX1/ABI1/GSK3B/STX7/LOC100430627/IL15/TRA2A/KLF12/JMY/DOCK11/RELL1/ROCK1/GLUD1/MCL1/NR3C1/UBQLN1/PPP1R10/RSU1/YTHDF3/ITGA4/ARHGEF3/HSP90AA1/AP1G1/CHSY1/ZRANB1/CTNNB1/M…
GO:0044093	GO:0044093	positive regulation of molecular function	101	0.325961	1.85662	0.000721997	0.00288799	0.00108864	393	tags=30%, list=18%, signal=26%	MAPRE2/FBXW7/RGS1/ARRDC3/CCL4L1/NR4A2/PPP1R15A/SMAD3/OSBPL8/PRKCB/LOC100426632/STIM1/FER/SRGAP2/ABI1/GSK3B/LOC100430627/PMAIP1/JMY/DOCK11/CHN2/ROCK1/RSU1/HSP90AA1/CTNNB1/ATP1B3/TANK/SIRT1/RPS6KA5/PLEK
GO:0016310	GO:0016310	phosphorylation	163	0.283234	1.76496	0.000868153	0.00323455	0.00121928	799	tags=50%, list=36%, signal=34%	FBXW7/SNRK/PRKCA/DUSP1/UBASH3B/SKAP2/DNAJA1/GNAQ/OSBPL8/OXSR1/SIK3/FYN/PRKCH/PRKCB/TOP1/DYRK1A/ST3GAL1/PRR5L/TNIK/JAK1/JUN/FER/ITPKB/CDK17/MAP3K2/ABI1/GSK3B/IL15/CLK1/ROCK1/HIPK1/SIK1/LOC106992273/MAP4K4/HSP90AA1/CSNK1G3/MAPKAP1/JAK2/RPS6KB1/SKAP1/SIRT1/HNRNPU/AKAP10/RPS6KA5/DNAJC3/STK17B/LATS1/CCNY/CDK12/RAF1/AKT3/SMYD3/NEK7/MAP2K4/JAKMIP2/MAPK1/PAK2/CDK19/SRPK2/NOTCH2/BAZ1B/ADAR/PRKAG2/SMG1/TGF…
GO:0007166	GO:0007166	cell surface receptor signaling pathway	157	0.280976	1.73445	0.000874203	0.00323455	0.00121928	339	tags=24%, list=15%, signal=22%	KLRD1/FOS/FBXW7/CHST11/PRKCA/CD226/CCL4L1/PDE4D/UBASH3B/SMAD3/BCL2A1/GNAQ/OSBPL8/OXSR1/PRKCB/LOC100426632/FOXO1/JAK1/JUN/FER/ITPKB/PELI1/GSK3B/LOC100430627/IL15/TIPARP/MCL1/YTHDF3/ITGA4/FUT8/CHSY1/ZRANB1/CSNK1G3/CTNNB1/JAK2/TOB1/MGAT5/NFATC2
GO:0010556	GO:0010556	regulation of macromolecule biosynthetic process	351	0.227883	1.57137	0.000844137	0.00323455	0.00121928	949	tags=54%, list=43%, signal=36%	FOSB/FOS/FBXW7/ZFP36/ZEB2/CD226/BTG2/PDE4D/NR4A2/ZFP36L1/PPP1R15A/SMAD3/SLC38A2/CCNL1/PTBP3/KLF6/YWHAZ/AFF1/PRKCB/BHLHE40/TOP1/FOXO1/PRR5L/ZNF644/JUN/FER/ID2/BCLAF1/CDK17/NCOA2/PELI1/RUNX1/GSK3B/IKZF3/IL15/TRA2A/TIPARP/KLF12/JMY/ETV6/ROCK1/ELF1/ZHX2/NR3C1/YTHDF3/SMG6/FUT8/HSP90AA1/CTNNB1/HNRNPAB/MRTFA/FXR1/TOB1/ZNF148/ZBTB38/NFATC2/CLTC/MSL2/TANK/L3MBTL3/SIRT1/SERTAD1/HNRNPU/SNIP1/BATF/EIF5/RPS6K…
GO:0051239	GO:0051239	regulation of multicellular organismal process	136	0.297557	1.78574	0.00101539	0.00366532	0.00138166	286	tags=22%, list=13%, signal=20%	FOS/MAPRE2/FBXW7/ZFP36/ARRDC3/PRKCA/CD226/BTG2/PDE4D/RHOH/UBASH3B/NR4A2/SMAD3/PRKCB/JAK1/JUN/FER/ITPKB/ENPP4/PELI1/RUNX1/VCL/IKZF3/IL15/ROCK1/MTPN/HSP90AA1/AP1G1/CHSY1/CTNNB1
GO:0051173	GO:0051173	positive regulation of nitrogen compound metabolic process	211	0.2603	1.68269	0.00108516	0.00382074	0.00144025	930	tags=55%, list=42%, signal=35%	FOS/FBXW7/ZFP36/ARRDC3/BTG2/ZFP36L1/PPP1R15A/SMAD3/SLC38A2/OSBPL8/KANSL1/FOXO1/PRR5L/JUN/BCLAF1/BABAM2/NCOA2/PELI1/RUNX1/ABI1/GSK3B/IL15/TRA2A/TIPARP/KLF12/PMAIP1/ROCK1/NR3C1/UBQLN1/PPP1R10/YTHDF3/HSP90AA1/CTNNB1/MAPKAP1/MRTFA/TOB1/ZNF148/MSL2/PTTG1IP/TANK/L3MBTL3/SIRT1/SERTAD1/HNRNPU/RPS6KA5/PUM1/DNAJC3/KDM3A/FAM168A/FAS/QRICH1/CDC73/HSPA5/IST1/MGMT/CDK12/RAF1/MEF2A/DCP2/SMARCA2/SMYD3/MAPK1/RNF1…
GO:0006355	GO:0006355	regulation of DNA-templated transcription	218	0.258195	1.6748	0.00114348	0.00382074	0.00144025	949	tags=56%, list=43%, signal=36%	FOSB/FOS/ZFP36/ZEB2/NR4A2/SMAD3/CCNL1/KLF6/YWHAZ/PRKCB/BHLHE40/FOXO1/ZNF644/JUN/FER/ID2/BCLAF1/CDK17/NCOA2/PELI1/RUNX1/IKZF3/KLF12/JMY/ETV6/ELF1/ZHX2/NR3C1/CTNNB1/MRTFA/ZNF148/ZBTB38/NFATC2/MSL2/L3MBTL3/SIRT1/SERTAD1/HNRNPU/SNIP1/BATF/RPS6KA5/KDM3A/ZZZ3/NFKBIB/GATAD2A/QRICH1/CDC73/TFDP2/NFX1/GATAD2B/MED13L/PSPC1/CDK12/LRRFIP2/MEF2A/SMARCA2/CCNH/LOC706619/SMYD3/VGLL4/SMAD7/ACTR2/TCF12/CBFB/DDX21/N…
GO:2001141	GO:2001141	regulation of RNA biosynthetic process	218	0.258195	1.6748	0.00114348	0.00382074	0.00144025	949	tags=56%, list=43%, signal=36%	FOSB/FOS/ZFP36/ZEB2/NR4A2/SMAD3/CCNL1/KLF6/YWHAZ/PRKCB/BHLHE40/FOXO1/ZNF644/JUN/FER/ID2/BCLAF1/CDK17/NCOA2/PELI1/RUNX1/IKZF3/KLF12/JMY/ETV6/ELF1/ZHX2/NR3C1/CTNNB1/MRTFA/ZNF148/ZBTB38/NFATC2/MSL2/L3MBTL3/SIRT1/SERTAD1/HNRNPU/SNIP1/BATF/RPS6KA5/KDM3A/ZZZ3/NFKBIB/GATAD2A/QRICH1/CDC73/TFDP2/NFX1/GATAD2B/MED13L/PSPC1/CDK12/LRRFIP2/MEF2A/SMARCA2/CCNH/LOC706619/SMYD3/VGLL4/SMAD7/ACTR2/TCF12/CBFB/DDX21/N…
GO:0048519	GO:0048519	negative regulation of biological process	336	0.226136	1.54743	0.00116171	0.00382074	0.00144025	525	tags=30%, list=24%, signal=27%	KLRD1/FBXW7/ZFP36/ZEB2/CHST11/ARRDC3/PRKCA/BTG2/PDE4D/DUSP1/RHOH/UBASH3B/SKAP2/NR4A2/ZFP36L1/PPP1R15A/SMAD3/DNAJA1/BCL2A1/GNAQ/OSBPL8/YWHAZ/OXSR1/PRKCB/RASA2/FOXO1/ST3GAL1/PRR5L/JUN/FER/ID2/BCLAF1/BABAM2/ITPKB/SRGAP2/PELI1/GSK3B/TIPARP/ROCK1/MTPN/ZHX2/MCL1/UBQLN1/LRCH1/PPP1R10/YTHDF3/SMG6/CHSY1/CTNNB1/MAPKAP1/HNRNPAB/TOB1/IVNS1ABP/MGAT5/ZNF148/ZBTB38/NFATC2/CLTC/PDS5A/PTTG1IP/AVEN/TANK/L3MBTL3/ZF…
GO:0002682	GO:0002682	regulation of immune system process	104	0.309501	1.78276	0.00121255	0.00390125	0.0014706	286	tags=24%, list=13%, signal=22%	KLRD1/FOS/FBXW7/ZFP36/CD226/PDE4D/DUSP1/RHOH/UBASH3B/SMAD3/OXSR1/PRKCB/NKG2D/FER/ITPKB/PELI1/RUNX1/IKZF3/STX7/IL15/LRCH1/YTHDF3/HSP90AA1/AP1G1/CTNNB1
GO:0006351	GO:0006351	DNA-templated transcription	232	0.253483	1.64565	0.00131416	0.00405199	0.00152742	949	tags=56%, list=43%, signal=36%	FOSB/FOS/ZFP36/ZEB2/NR4A2/SMAD3/POLR2A/CCNL1/KLF6/YWHAZ/PRKCB/BHLHE40/FOXO1/ZNF644/JUN/FER/ID2/BCLAF1/CDK17/NCOA2/PELI1/RUNX1/IKZF3/PHF3/KLF12/JMY/ETV6/ELF1/ZHX2/NR3C1/CTNNB1/MRTFA/ZNF148/ZBTB38/NFATC2/MSL2/L3MBTL3/SIRT1/SERTAD1/HNRNPU/SNIP1/BATF/RPS6KA5/KDM3A/ZZZ3/NFKBIB/GATAD2A/QRICH1/CDC73/TFDP2/NFX1/GATAD2B/MED13L/PSPC1/CDK12/LRRFIP2/MEF2A/SMARCA2/CCNH/LOC706619/SMYD3/VGLL4/SMAD7/ACTR2/TCF12/…
GO:0032774	GO:0032774	RNA biosynthetic process	232	0.253483	1.64565	0.00131416	0.00405199	0.00152742	949	tags=56%, list=43%, signal=36%	FOSB/FOS/ZFP36/ZEB2/NR4A2/SMAD3/POLR2A/CCNL1/KLF6/YWHAZ/PRKCB/BHLHE40/FOXO1/ZNF644/JUN/FER/ID2/BCLAF1/CDK17/NCOA2/PELI1/RUNX1/IKZF3/PHF3/KLF12/JMY/ETV6/ELF1/ZHX2/NR3C1/CTNNB1/MRTFA/ZNF148/ZBTB38/NFATC2/MSL2/L3MBTL3/SIRT1/SERTAD1/HNRNPU/SNIP1/BATF/RPS6KA5/KDM3A/ZZZ3/NFKBIB/GATAD2A/QRICH1/CDC73/TFDP2/NFX1/GATAD2B/MED13L/PSPC1/CDK12/LRRFIP2/MEF2A/SMARCA2/CCNH/LOC706619/SMYD3/VGLL4/SMAD7/ACTR2/TCF12/…
GO:0048583	GO:0048583	regulation of response to stimulus	274	0.231941	1.55526	0.00207987	0.00628207	0.00236806	413	tags=25%, list=19%, signal=23%	KLRD1/MAPRE2/FBXW7/ZFP36/CHST11/ARRDC3/PRKCA/CD226/CCL4L1/PDE4D/DUSP1/RHOH/UBASH3B/NR4A2/SMAD3/SLC38A2/DNAJA1/GNAQ/OSBPL8/OXSR1/PRKCB/RASA2/LOC100426632/NKG2D/FOXO1/JUN/FER/BCLAF1/BABAM2/ITPKB/ENPP4/PELI1/GSK3B/STX7/LOC100430627/IL15/RELL1/CHN2/ROCK1/MTPN/MCL1/UBQLN1/PPP1R10/YTHDF3/MAP4K4/ARHGEF3/FUT8/HSP90AA1/AP1G1/CHSY1/ZRANB1/CTNNB1/MAPKAP1/TOB1/IVNS1ABP/MGAT5/GBF1/NFATC2/PTTG1IP/TANK/ZFAND6/S…
GO:0050793	GO:0050793	regulation of developmental process	110	0.298035	1.72527	0.00264102	0.00742509	0.00279893	796	tags=50%, list=36%, signal=34%	FOS/FBXW7/ZFP36/PRKCA/BTG2/RHOH/UBASH3B/SMAD3/PTBP3/PRKCB/JAK1/ITPKB/RUNX1/VCL/GSK3B/IKZF3/ROCK1/ZHX2/ZRANB1/CTNNB1/TOB1/NFATC2/SIRT1/HNRNPU/KDM3A/ZZZ3/MBNL3/CDC73/IST1/CDK12/AKT3/MAPK1/PAK2/TCF12/CBFB/ATP11A/NOTCH2/SMURF2/ATP2B1/C3H21orf91/NR1D2/HSPA9/TGFBR2/CNOT2/AMBRA1/NFATC3/KAT7/HDAC4/TRIP12/HUWE1/NR2C2/FNIP1/ATP2B4/MCU/BRAF
GO:0065003	GO:0065003	protein-containing complex assembly	126	-0.290708	-1.65295	0.00265899	0.00742509	0.00279893	532	tags=40%, list=24%, signal=32%	CHMP2A/NOP53/EIF2S3/TBCC/EIF3E/NDUFA2/NPM1/CCT3/CLTA/ARPC4/VASP/EIF3K/SNRPF/ARPC5/LGALS3/HIGD2A/ARPC3/STOML2/TAF10/BRK1/NDUFA1/NDUFB7/SET/COX19/SUB1/HSPA8/RPS27L/SNRPG/SNRPB/NDUFB8/ARPC2/RPS5/RPS15/PFDN5/ATP5F1D/HMGB1/PET100/RPL10/TGFB1/EIF3F/RPL23A/RPL5/RPL6/SSNA1/LOC717879/SAMHD1/RPSA/RPL38/RPS28/RPS27
GO:0048468	GO:0048468	cell development	148	0.270576	1.63609	0.00253671	0.00742509	0.00279893	681	tags=41%, list=31%, signal=30%	FOS/FBXW7/ZFP36/CHST11/BTG2/PDE4D/RHOH/UBASH3B/NR4A2/SMAD3/YWHAZ/ST3GAL1/JUN/ITPKB/SRGAP2/C1GALT1/KMT2E/RUNX1/VCL/GSK3B/IKZF3/RERE/TIPARP/DOCK11/ROCK1/NR3C1/WDR7/MAP4K4/HSP90AA1/CHSY1/CTNNB1/NFATC2/PSME4/L3MBTL3/SIRT1/HNRNPU/PLEK/KDM3A/B4GALT1/CDC73/TPD52/IST1/MEF2A/SMYD3/PLCL2/MAPK1/ACTN4/PAK2/CBFB/ATRX/DDX21/NOTCH2/TENT2/ADAR/C3H21orf91/KIF5B/HSPA9/TGFBR2/AMBRA1/GAB3
GO:0010646	GO:0010646	regulation of cell communication	227	0.233358	1.51634	0.002606	0.00742509	0.00279893	370	tags=23%, list=17%, signal=21%	MAPRE2/FBXW7/CHST11/ARRDC3/PRKCA/CD226/CCL4L1/PDE4D/DUSP1/RHOH/UBASH3B/NR4A2/SMAD3/DNAJA1/GNAQ/OSBPL8/PRKCB/RASA2/LOC100426632/FOXO1/MCTP2/JUN/FER/BTBD9/BCLAF1/ITPKB/PELI1/GSK3B/LOC100430627/RELL1/CHN2/ROCK1/GLUD1/MCL1/UBQLN1/PPP1R10/YTHDF3/MAP4K4/ARHGEF3/HSP90AA1/CHSY1/ZRANB1/CTNNB1/MAPKAP1/TOB1/IVNS1ABP/MGAT5/GBF1/PTTG1IP/TANK/ZFAND6/SIRT1
GO:0010604	GO:0010604	positive regulation of macromolecule metabolic process	238	0.237902	1.54572	0.00275558	0.00755234	0.0028469	930	tags=53%, list=42%, signal=35%	FOS/FBXW7/ZFP36/ARRDC3/CD226/BTG2/PDE4D/ZFP36L1/PPP1R15A/SMAD3/SLC38A2/OSBPL8/KANSL1/FOXO1/PRR5L/JUN/BCLAF1/BABAM2/NCOA2/PELI1/RUNX1/ABI1/GSK3B/IL15/TRA2A/TIPARP/KLF12/PMAIP1/ROCK1/NR3C1/UBQLN1/PPP1R10/YTHDF3/HSP90AA1/CTNNB1/MAPKAP1/HNRNPAB/MRTFA/TOB1/ZNF148/NFATC2/MSL2/PTTG1IP/TANK/L3MBTL3/SIRT1/SERTAD1/HNRNPU/RPS6KA5/PUM1/DNAJC3/KDM3A/FAM168A/FAS/QRICH1/CDC73/HSPA5/KDM6A/IST1/MGMT/CDK12/RAF1/ME…
GO:0043067	GO:0043067	regulation of programmed cell death	115	0.288831	1.69187	0.00309741	0.00833484	0.00314187	489	tags=34%, list=22%, signal=28%	FBXW7/ZFP36/CHST11/PRKCA/NR4A2/DNAJA1/BCL2A1/YWHAZ/FOXO1/ST3GAL1/JUN/BCLAF1/ITPKB/PELI1/GSK3B/IKZF3/JMY/ROCK1/MCL1/NR3C1/UBQLN1/PPP1R10/ITGA4/HSP90AA1/CTNNB1/IVNS1ABP/PTTG1IP/AVEN/ZFAND6/SIRT1/DNAJC3/FAS/STK17B/B4GALT1/QRICH1/CDC73/HSPA5/MGMT/RAF1
GO:0031399	GO:0031399	regulation of protein modification process	101	0.296746	1.69021	0.00349603	0.0092395	0.00348288	489	tags=33%, list=22%, signal=27%	FBXW7/ARRDC3/DUSP1/UBASH3B/PPP1R15A/DNAJA1/GNAQ/OSBPL8/KANSL1/PRR5L/JUN/FER/ITPKB/PELI1/ABI1/GSK3B/IL15/ROCK1/UBQLN1/HSP90AA1/CTNNB1/MAPKAP1/IVNS1ABP/MGAT5/PTTG1IP/TANK/SIRT1/DNAJC3/ZZZ3/HSPA5/CCNY/CDK12/RAF1
GO:0009893	GO:0009893	positive regulation of metabolic process	248	0.229743	1.49867	0.00370674	0.00958599	0.00361349	844	tags=48%, list=38%, signal=33%	FOS/FBXW7/ZFP36/ARRDC3/CD226/BTG2/PDE4D/ZFP36L1/PPP1R15A/SMAD3/SLC38A2/ELOVL5/OSBPL8/KANSL1/FOXO1/PRR5L/JUN/BCLAF1/BABAM2/NCOA2/PELI1/RUNX1/ABI1/GSK3B/IL15/TRA2A/TIPARP/KLF12/PMAIP1/ROCK1/NR3C1/UBQLN1/PPP1R10/YTHDF3/HSP90AA1/CTNNB1/MAPKAP1/HNRNPAB/MRTFA/TOB1/ZNF148/NFATC2/MSL2/PTTG1IP/TANK/L3MBTL3/SIRT1/SERTAD1/HNRNPU/RPS6KA5/PUM1/DNAJC3/PLEK/KDM3A/FAM168A/FAS/QRICH1/CDC73/HSPA5/KDM6A/IST1/MGMT/C…
GO:0048856	GO:0048856	anatomical structure development	265	0.224223	1.49231	0.00375667	0.00958599	0.00361349	695	tags=38%, list=31%, signal=30%	FOS/FBXW7/ZFP36/CHST11/ARRDC3/RHOBTB3/PRKCA/BTG2/PDE4D/DUSP1/RHOH/UBASH3B/NR4A2/SMAD3/YWHAZ/PRKCB/IMMP2L/TOP1/ST3GAL1/JAK1/JUN/ITPKB/SRGAP2/C1GALT1/KMT2E/RUNX1/VCL/GSK3B/IKZF3/RERE/TIPARP/MYO6/DOCK11/ROCK1/ZHX2/NR3C1/WDR7/GNB1/YTHDF3/ITGA4/MAP4K4/HSP90AA1/CHSY1/ZRANB1/CTNNB1/FRYL/FXR1/ZNF800/NFATC2/PSME4/SAT1/L3MBTL3/SIRT1/HNRNPU/MATR3/PLEK/KDM3A/ZZZ3/MBNL3/EXOC4/B4GALT1/CDC73/HSPA5/TPD52/LMBR1/K…
GO:0031325	GO:0031325	positive regulation of cellular metabolic process	217	0.233749	1.51819	0.00394855	0.00990483	0.00373369	844	tags=48%, list=38%, signal=33%	FOS/FBXW7/ZFP36/CD226/BTG2/PDE4D/ZFP36L1/PPP1R15A/SMAD3/SLC38A2/ELOVL5/OSBPL8/FOXO1/PRR5L/JUN/BCLAF1/BABAM2/NCOA2/PELI1/RUNX1/ABI1/GSK3B/IL15/TRA2A/KLF12/ROCK1/NR3C1/PPP1R10/YTHDF3/HSP90AA1/CTNNB1/MAPKAP1/HNRNPAB/MRTFA/TOB1/ZNF148/NFATC2/MSL2/TANK/SIRT1/SERTAD1/HNRNPU/RPS6KA5/PUM1/DNAJC3/PLEK/KDM3A/FAM168A/QRICH1/CDC73/KDM6A/MGMT/CDK12/RAF1/MEF2A/DCP2/SMARCA2/SMYD3/GRB2/MAPK1/PAK2/ACTR2/TCF12/CBF…
GO:0007275	GO:0007275	multicellular organism development	202	0.242293	1.56201	0.00480824	0.0118603	0.00447082	695	tags=39%, list=31%, signal=30%	FOS/FBXW7/ZFP36/CHST11/RHOBTB3/PRKCA/BTG2/DUSP1/RHOH/UBASH3B/NR4A2/SMAD3/YWHAZ/PRKCB/IMMP2L/TOP1/JAK1/JUN/ITPKB/SRGAP2/C1GALT1/RUNX1/VCL/GSK3B/IKZF3/RERE/TIPARP/MYO6/ROCK1/ZHX2/NR3C1/GNB1/YTHDF3/ITGA4/MAP4K4/HSP90AA1/CHSY1/CTNNB1/ZNF800/NFATC2/SAT1/SIRT1/HNRNPU/MATR3/ZZZ3/EXOC4/B4GALT1/CDC73/HSPA5/LMBR1/KDM6A/IST1/MEF2A/AKT3/HS2ST1/ACSL4/GRB2/MAPK1/PAK2/TCF12/CBFB/ATRX/DDX21/ATP11A/NOTCH2/SMURF2/…
GO:0042981	GO:0042981	regulation of apoptotic process	112	0.276547	1.59607	0.00510973	0.0123974	0.00467327	489	tags=33%, list=22%, signal=27%	FBXW7/ZFP36/CHST11/PRKCA/NR4A2/DNAJA1/BCL2A1/FOXO1/ST3GAL1/JUN/BCLAF1/ITPKB/GSK3B/IKZF3/JMY/ROCK1/MCL1/NR3C1/UBQLN1/PPP1R10/ITGA4/HSP90AA1/CTNNB1/IVNS1ABP/PTTG1IP/AVEN/ZFAND6/SIRT1/DNAJC3/FAS/STK17B/B4GALT1/QRICH1/CDC73/HSPA5/MGMT/RAF1
GO:0048513	GO:0048513	animal organ development	107	0.290098	1.66898	0.00530812	0.012671	0.00477641	388	tags=27%, list=17%, signal=23%	FOS/FBXW7/ZFP36/CHST11/ARRDC3/RHOBTB3/BTG2/NR4A2/SMAD3/YWHAZ/IMMP2L/JUN/SRGAP2/C1GALT1/GSK3B/RERE/TIPARP/MYO6/ROCK1/ZHX2/NR3C1/GNB1/CHSY1/CTNNB1/FXR1/ZNF800/SIRT1/HNRNPU/MATR3
GO:0033554	GO:0033554	cellular response to stress	154	0.257865	1.58188	0.005411	0.0127116	0.00479169	453	tags=28%, list=20%, signal=24%	FOS/ZFP36/BTG2/DUSP1/NR4A2/PPP1R15A/SMAD3/SLC38A2/DNAJA1/BCL2A1/OXSR1/IMMP2L/FOXO1/PRR5L/JUN/FER/BCLAF1/BABAM2/GSK3B/XPR1/PMAIP1/JMY/MYO6/RELL1/MCL1/UBQLN1/PPP1R10/FUT8/HSP90AA1/MAPKAP1/ZBTB38/NFATC2/PSME4/PTTG1IP/TANK/SIRT1/DNAJC3/NBN/FAM168A/MTMR3/FAS/QRICH1/HSPA5
GO:0042221	GO:0042221	response to chemical	191	0.244437	1.55338	0.0062121	0.0143655	0.00541515	288	tags=20%, list=13%, signal=19%	FOSB/FOS/ZFP36/PRKCA/CCL4L1/DUSP1/NR4A2/SLC38A2/DNAJA1/GNAQ/OSBPL8/OXSR1/PRKCB/LOC100426632/TOP1/FOXO1/PRR5L/JAK1/JUN/FER/BCLAF1/ITPKB/PELI1/PAM/GSK3B/LOC100430627/IL15/TIPARP/ROCK1/MCL1/NR3C1/UBQLN1/LRCH1/CX3CR1/YTHDF3/ITGA4/FUT8/CTNNB1/MAPKAP1
GO:0010033	GO:0010033	response to organic substance	158	0.257206	1.58802	0.00643916	0.0146615	0.00552673	453	tags=28%, list=20%, signal=24%	FOSB/FOS/ZFP36/PRKCA/CCL4L1/DUSP1/NR4A2/DNAJA1/GNAQ/OSBPL8/OXSR1/PRKCB/LOC100426632/FOXO1/JAK1/JUN/FER/BCLAF1/ITPKB/PELI1/GSK3B/LOC100430627/IL15/TIPARP/ROCK1/MCL1/NR3C1/UBQLN1/LRCH1/YTHDF3/ITGA4/CTNNB1/JAK2/TANK/ZFAND6/SIRT1/HNRNPU/RPS6KA5/KDM3A/NFKBIB/HLCS/QRICH1/CDC73/HSPA5
GO:0032879	GO:0032879	regulation of localization	114	0.270958	1.58219	0.00714363	0.0159123	0.00599823	372	tags=25%, list=17%, signal=22%	FBXW7/ZFP36/UBASH3B/DNAJA1/OSBPL8/OXSR1/PRKCB/STIM1/MCTP2/PRR5L/JAK1/FER/BTBD9/VCL/GSK3B/STX7/IL15/MYO6/ROCK1/GLUD1/UBQLN1/HSP90AA1/AP1G1/CTNNB1/XPO1/ATP1B3/CLTC/SIRT1/HNRNPU
GO:0009966	GO:0009966	regulation of signal transduction	217	0.228028	1.48103	0.00720354	0.0159123	0.00599823	413	tags=24%, list=19%, signal=22%	MAPRE2/FBXW7/CHST11/ARRDC3/PRKCA/CD226/CCL4L1/PDE4D/DUSP1/RHOH/UBASH3B/NR4A2/SMAD3/DNAJA1/GNAQ/OSBPL8/PRKCB/RASA2/LOC100426632/FOXO1/JUN/FER/BCLAF1/ITPKB/PELI1/GSK3B/LOC100430627/RELL1/CHN2/ROCK1/MCL1/UBQLN1/PPP1R10/YTHDF3/MAP4K4/ARHGEF3/HSP90AA1/CHSY1/ZRANB1/CTNNB1/MAPKAP1/TOB1/IVNS1ABP/MGAT5/GBF1/PTTG1IP/TANK/ZFAND6/SIRT1/PUM1/PLEK/WDFY1/NFKBIB
GO:0070887	GO:0070887	cellular response to chemical stimulus	163	0.253621	1.58043	0.00784507	0.0165867	0.00625246	288	tags=21%, list=13%, signal=20%	FOSB/FOS/ZFP36/PRKCA/CCL4L1/DUSP1/NR4A2/SLC38A2/DNAJA1/GNAQ/OSBPL8/OXSR1/PRKCB/LOC100426632/FOXO1/PRR5L/JAK1/JUN/FER/BCLAF1/ITPKB/GSK3B/LOC100430627/IL15/TIPARP/ROCK1/NR3C1/UBQLN1/LRCH1/YTHDF3/ITGA4/FUT8/CTNNB1/MAPKAP1
GO:0045935	GO:0045935	positive regulation of nucleobase-containing compound metabolic process	138	0.254573	1.52918	0.00768578	0.0165867	0.00625246	875	tags=51%, list=39%, signal=33%	FOS/ZFP36/BTG2/ZFP36L1/SMAD3/SLC38A2/PRR5L/JUN/BCLAF1/BABAM2/NCOA2/RUNX1/TRA2A/KLF12/ROCK1/NR3C1/PPP1R10/YTHDF3/HSP90AA1/CTNNB1/MRTFA/TOB1/ZNF148/MSL2/SIRT1/SERTAD1/HNRNPU/RPS6KA5/PUM1/KDM3A/FAM168A/QRICH1/CDC73/MGMT/CDK12/MEF2A/DCP2/SMARCA2/SMYD3/MAPK1/ACTR2/CBFB/ATRX/DDX21/GPBP1L1/NR1D2/ZC3H18/CNOT2/GPBP1/SSBP2/KAT7/MAX/HDAC4/MED1/NR2C2/TUT7/IRF2/USP9X/PPM1A/KDM5A/NCK2/USP7/MDFIC/FOXO3/CTCF/ELF…
GO:0023051	GO:0023051	regulation of signaling	229	0.231447	1.50796	0.00784225	0.0165867	0.00625246	370	tags=23%, list=17%, signal=21%	MAPRE2/FBXW7/CHST11/ARRDC3/PRKCA/CD226/CCL4L1/PDE4D/DUSP1/RHOH/UBASH3B/NR4A2/SMAD3/DNAJA1/GNAQ/OSBPL8/PRKCB/RASA2/LOC100426632/FOXO1/MCTP2/JUN/FER/BTBD9/BCLAF1/ITPKB/PELI1/GSK3B/LOC100430627/RELL1/CHN2/ROCK1/GLUD1/MCL1/UBQLN1/PPP1R10/YTHDF3/MAP4K4/ARHGEF3/HSP90AA1/CHSY1/ZRANB1/CTNNB1/MAPKAP1/TOB1/IVNS1ABP/MGAT5/GBF1/PTTG1IP/TANK/ZFAND6/SIRT1
GO:0008219	GO:0008219	cell death	145	0.253233	1.53432	0.0104829	0.0215481	0.00812268	453	tags=30%, list=20%, signal=25%	FBXW7/ZFP36/CHST11/PRKCA/NR4A2/SMAD3/DNAJA1/BCL2A1/YWHAZ/PRKCB/FOXO1/ST3GAL1/JUN/BCLAF1/BABAM2/ITPKB/PELI1/GSK3B/IKZF3/ELMO1/PMAIP1/JMY/ROCK1/MCL1/NR3C1/UBQLN1/PPP1R10/ITGA4/HSP90AA1/CTNNB1/IVNS1ABP/PTTG1IP/AVEN/ZFAND6/SIRT1/DNAJC3/RFFL/FAS/STK17B/B4GALT1/QRICH1/CDC73/HSPA5
GO:0012501	GO:0012501	programmed cell death	145	0.253233	1.53432	0.0104829	0.0215481	0.00812268	453	tags=30%, list=20%, signal=25%	FBXW7/ZFP36/CHST11/PRKCA/NR4A2/SMAD3/DNAJA1/BCL2A1/YWHAZ/PRKCB/FOXO1/ST3GAL1/JUN/BCLAF1/BABAM2/ITPKB/PELI1/GSK3B/IKZF3/ELMO1/PMAIP1/JMY/ROCK1/MCL1/NR3C1/UBQLN1/PPP1R10/ITGA4/HSP90AA1/CTNNB1/IVNS1ABP/PTTG1IP/AVEN/ZFAND6/SIRT1/DNAJC3/RFFL/FAS/STK17B/B4GALT1/QRICH1/CDC73/HSPA5
GO:0050790	GO:0050790	regulation of catalytic activity	130	0.265629	1.58371	0.0108286	0.0219538	0.00827561	286	tags=22%, list=13%, signal=20%	MAPRE2/FBXW7/ZFP36/RGS1/ARRDC3/CCL4L1/DUSP1/UBASH3B/NR4A2/PPP1R15A/SMAD3/DNAJA1/GNAQ/OSBPL8/RASA2/LOC100426632/SRGAP2/ABI1/GSK3B/LOC100430627/PMAIP1/DOCK11/CHN2/ROCK1/LRCH1/RSU1/HSP90AA1/CTNNB1
GO:0071310	GO:0071310	cellular response to organic substance	126	0.26297	1.55824	0.0112955	0.0225909	0.00851578	453	tags=29%, list=20%, signal=25%	ZFP36/PRKCA/CCL4L1/DUSP1/NR4A2/DNAJA1/GNAQ/OSBPL8/OXSR1/PRKCB/LOC100426632/FOXO1/JAK1/JUN/FER/BCLAF1/GSK3B/LOC100430627/IL15/TIPARP/ROCK1/NR3C1/LRCH1/YTHDF3/ITGA4/CTNNB1/JAK2/TANK/ZFAND6/SIRT1/HNRNPU/RPS6KA5/KDM3A/NFKBIB/QRICH1/CDC73/HSPA5
GO:0002376	GO:0002376	immune system process	184	0.229417	1.46305	0.011518	0.0227289	0.0085678	286	tags=21%, list=13%, signal=20%	KLRD1/FOS/FBXW7/ZFP36/LOC714964/CD226/CCL4L1/PDE4D/DUSP1/RHOH/UBASH3B/SMAD3/OXSR1/PRKCB/LOC100426632/NKG2D/ST3GAL1/JAK1/JUN/FER/ITPKB/PELI1/KMT2E/RUNX1/IKZF3/STX7/LOC100430627/IL15/SLAMF1/DOCK11/ROCK1/LRCH1/CX3CR1/YTHDF3/ITGA4/HSP90AA1/AP1G1/CTNNB1
GO:0048585	GO:0048585	negative regulation of response to stimulus	102	0.271374	1.55538	0.0118633	0.0228587	0.00861672	370	tags=25%, list=17%, signal=21%	KLRD1/ZFP36/CHST11/ARRDC3/PDE4D/DUSP1/RHOH/UBASH3B/NR4A2/SMAD3/DNAJA1/RASA2/FOXO1/FER/GSK3B/MCL1/PPP1R10/YTHDF3/CTNNB1/MAPKAP1/TOB1/IVNS1ABP/PTTG1IP/TANK/SIRT1
GO:0006793	GO:0006793	phosphorus metabolic process	236	0.228568	1.48018	0.0118927	0.0228587	0.00861672	393	tags=25%, list=18%, signal=23%	FBXW7/SNRK/PRKCA/PDE4D/DUSP1/UBASH3B/SKAP2/PPP1R15A/DNAJA1/GNAQ/ELOVL5/OSBPL8/OXSR1/SIK3/FYN/PRKCH/PRKCB/TOP1/DYRK1A/ST3GAL1/PRR5L/TNIK/GMDS/JAK1/JUN/FER/SGMS1/ITPKB/CDK17/MAP3K2/ABI1/GSK3B/IL15/CLK1/ROCK1/ETNK1/HIPK1/FAR1/SIK1/LOC106992273/MAP4K4/FUT8/HSP90AA1/CSNK1G3/MAPKAP1/CMAH/JAK2/MGAT5/RPS6KB1/SKAP1/PTP4A1/PPP2R5C/SIRT1/HNRNPU/AKAP10/RPS6KA5/DNAJC3/PLEK
GO:0051246	GO:0051246	regulation of protein metabolic process	185	0.236387	1.5044	0.0123529	0.0234388	0.00883541	389	tags=24%, list=18%, signal=22%	FBXW7/ZFP36/ARRDC3/RHOBTB3/BTG2/DUSP1/UBASH3B/ZFP36L1/PPP1R15A/SMAD3/DNAJA1/GNAQ/OSBPL8/KANSL1/FOXO1/PRR5L/JUN/FER/BCLAF1/ITPKB/PELI1/ABI1/GSK3B/IL15/TIPARP/PMAIP1/ROCK1/UBQLN1/YTHDF3/HSP90AA1/CTNNB1/MAPKAP1/XPO1/FXR1/TOB1/IVNS1ABP/MGAT5/PTTG1IP/TANK/L3MBTL3/SIRT1/HNRNPU/EIF5/PUM1/DNAJC3
GO:1902531	GO:1902531	regulation of intracellular signal transduction	142	0.257486	1.55424	0.0127861	0.0239537	0.00902948	370	tags=26%, list=17%, signal=23%	MAPRE2/FBXW7/ARRDC3/CCL4L1/PDE4D/DUSP1/RHOH/DNAJA1/OSBPL8/PRKCB/RASA2/LOC100426632/FOXO1/JUN/BCLAF1/ITPKB/PELI1/GSK3B/LOC100430627/RELL1/CHN2/ROCK1/MCL1/UBQLN1/PPP1R10/MAP4K4/ARHGEF3/HSP90AA1/CTNNB1/MAPKAP1/TOB1/IVNS1ABP/GBF1/PTTG1IP/TANK/ZFAND6/SIRT1
GO:0031324	GO:0031324	negative regulation of cellular metabolic process	183	0.226901	1.4431	0.0137161	0.0253748	0.0095652	522	tags=30%, list=24%, signal=25%	FBXW7/ZFP36/ZEB2/BTG2/DUSP1/UBASH3B/NR4A2/ZFP36L1/PPP1R15A/SMAD3/DNAJA1/GNAQ/YWHAZ/PRR5L/JUN/ID2/BCLAF1/GSK3B/TIPARP/ROCK1/ZHX2/MCL1/YTHDF3/SMG6/CTNNB1/HNRNPAB/TOB1/MGAT5/ZNF148/ZBTB38/CLTC/PDS5A/L3MBTL3/SIRT1/HNRNPU/SNIP1/RPS6KA5/PUM1/DNAJC3/PLEK/SND1/PNRC2/GATAD2A/CDC73/NFX1/GATAD2B/PSPC1/MTM1/MEF2A/DCP2/SMARCA2/AKT3/USP36/SMYD3
GO:0009653	GO:0009653	anatomical structure morphogenesis	127	0.25022	1.48262	0.0144096	0.0263287	0.00992476	594	tags=37%, list=27%, signal=29%	FBXW7/CHST11/PRKCA/DUSP1/NR4A2/SMAD3/YWHAZ/PRKCB/JAK1/JUN/SRGAP2/C1GALT1/VCL/RERE/TIPARP/MYO6/ROCK1/ZHX2/NR3C1/ITGA4/MAP4K4/HSP90AA1/CHSY1/ZRANB1/CTNNB1/FRYL/NFATC2/SAT1/SIRT1/MATR3/EXOC4/B4GALT1/CDC73/HSPA5/LMBR1/KDM6A/IST1/MTM1/MEF2A/AKT3/HS2ST1/GRB2/MAPK1/PAK2/ATRX/DDX21/NOTCH2
GO:0048584	GO:0048584	positive regulation of response to stimulus	166	0.235037	1.47196	0.0159737	0.0288306	0.0108679	286	tags=19%, list=13%, signal=18%	KLRD1/MAPRE2/FBXW7/ARRDC3/PRKCA/CD226/CCL4L1/PDE4D/OSBPL8/OXSR1/PRKCB/LOC100426632/NKG2D/JUN/BCLAF1/BABAM2/ITPKB/ENPP4/PELI1/STX7/LOC100430627/IL15/RELL1/ROCK1/MCL1/UBQLN1/ARHGEF3/HSP90AA1/AP1G1/CHSY1/ZRANB1/CTNNB1
GO:0034654	GO:0034654	nucleobase-containing compound biosynthetic process	259	0.207507	1.37691	0.0167015	0.0297809	0.0112261	949	tags=53%, list=43%, signal=34%	FOSB/FOS/ZFP36/ZEB2/NR4A2/SMAD3/POLR2A/CCNL1/ELOVL5/KLF6/YWHAZ/PRKCB/BHLHE40/FOXO1/ZNF644/GMDS/JUN/FER/ID2/BCLAF1/CDK17/NCOA2/PELI1/RUNX1/IKZF3/PHF3/KLF12/JMY/ETV6/ELF1/ZHX2/NR3C1/HSP90AA1/CTNNB1/MRTFA/ZNF148/ZBTB38/NFATC2/MSL2/L3MBTL3/SIRT1/SERTAD1/HNRNPU/SNIP1/BATF/RPS6KA5/KDM3A/ZZZ3/NFKBIB/GATAD2A/QRICH1/CDC73/TFDP2/NFX1/GATAD2B/MED13L/PSPC1/CDK12/LRRFIP2/MEF2A/DCP2/SMARCA2/CCNH/LOC706619/SMYD…
GO:0051254	GO:0051254	positive regulation of RNA metabolic process	120	0.253893	1.49583	0.0179336	0.0315973	0.0119108	875	tags=51%, list=39%, signal=33%	FOS/ZFP36/BTG2/ZFP36L1/SMAD3/SLC38A2/PRR5L/JUN/BCLAF1/NCOA2/RUNX1/TRA2A/KLF12/ROCK1/NR3C1/YTHDF3/CTNNB1/MRTFA/TOB1/ZNF148/MSL2/SIRT1/SERTAD1/HNRNPU/RPS6KA5/PUM1/KDM3A/QRICH1/CDC73/CDK12/MEF2A/DCP2/SMARCA2/SMYD3/ACTR2/CBFB/DDX21/GPBP1L1/NR1D2/ZC3H18/CNOT2/GPBP1/SSBP2/KAT7/MAX/HDAC4/MED1/NR2C2/TUT7/IRF2/PPM1A/KDM5A/NCK2/MDFIC/FOXO3/CTCF/ELF2/PPP1R12A/FBXW11/TNRC6B/MED13
GO:0006915	GO:0006915	apoptotic process	141	0.24354	1.46485	0.0198493	0.0345612	0.013028	453	tags=29%, list=20%, signal=25%	FBXW7/ZFP36/CHST11/PRKCA/NR4A2/SMAD3/DNAJA1/BCL2A1/PRKCB/FOXO1/ST3GAL1/JUN/BCLAF1/BABAM2/ITPKB/GSK3B/IKZF3/ELMO1/PMAIP1/JMY/ROCK1/MCL1/NR3C1/UBQLN1/PPP1R10/ITGA4/HSP90AA1/CTNNB1/IVNS1ABP/PTTG1IP/AVEN/ZFAND6/SIRT1/DNAJC3/RFFL/FAS/STK17B/B4GALT1/QRICH1/CDC73/HSPA5
GO:0006796	GO:0006796	phosphate-containing compound metabolic process	232	0.217846	1.41429	0.0211072	0.0363241	0.0136926	393	tags=24%, list=18%, signal=22%	FBXW7/SNRK/PRKCA/PDE4D/DUSP1/UBASH3B/SKAP2/PPP1R15A/DNAJA1/GNAQ/ELOVL5/OSBPL8/OXSR1/SIK3/FYN/PRKCH/PRKCB/TOP1/DYRK1A/ST3GAL1/PRR5L/TNIK/JAK1/JUN/FER/SGMS1/ITPKB/CDK17/MAP3K2/ABI1/GSK3B/IL15/CLK1/ROCK1/ETNK1/HIPK1/FAR1/SIK1/LOC106992273/MAP4K4/HSP90AA1/CSNK1G3/MAPKAP1/JAK2/MGAT5/RPS6KB1/SKAP1/PTP4A1/PPP2R5C/SIRT1/HNRNPU/AKAP10/RPS6KA5/DNAJC3/PLEK
GO:0051247	GO:0051247	positive regulation of protein metabolic process	102	0.252211	1.44555	0.0282072	0.0479847	0.0180881	938	tags=56%, list=42%, signal=34%	FBXW7/ARRDC3/PPP1R15A/SMAD3/OSBPL8/KANSL1/FOXO1/PRR5L/PELI1/ABI1/GSK3B/IL15/TIPARP/PMAIP1/UBQLN1/YTHDF3/HSP90AA1/CTNNB1/MAPKAP1/TOB1/PTTG1IP/TANK/L3MBTL3/SIRT1/HNRNPU/DNAJC3/FAS/HSPA5/IST1/RAF1/SMYD3/MAPK1/RNF19A/PAK2/NOTCH2/PRKAG2/TGFBR2/AMBRA1/MAPK8/HUWE1/FNIP1/PTPN1/ATP2B4/CRADD/BRAF/NCK2/HIP1/SOCS1/MYH9/PPP1R12A/PIK3CG/PHF20/FAF1/CAB39/APH1B/DLG1/RPTOR

## Sheet: CD4+ TRM 
	ID	Description	setSize	enrichmentScore	NES	pvalue	p.adjust	qvalue	rank	leading_edge	core_enrichment
GO:0006412	GO:0006412	translation	153	-0.599182	-3.47429	1.5398e-25	1.30113e-23	4.86251e-24	237	tags=45%, list=9%, signal=44%	EIF3K/RPS18/RPL10/RPL23A/RPS5/RPL39/RPS19/EIF3F/RSL24D1/RPS7/RPS8/RPS24/RPS4Y1/EEF1B2/EIF4A2/RPL8/RPL36AL/RPS9/LOC712274/RPL4/RPL11/RPL18/LOC107000401/EIF3E/RPL10A/RPL13A/RPL41/RPS23/RPL15/RPS16/RPL12/RPL30/RPL36/RPL17/FAU/RPS4X/RPL6/RPL27/RPS15/RPL9/UBA52/RPS20/RPL38/RPS13/RPL22/RPL21/RPL3/RPL5/RPL14/RPL26/RPS12/RPSA/RPS29/RPS2/EEF1G/RPL19/RPL34/LOC703455/RPS28/RPS21/RPL28/RPL35A/EEF1A1/RPS27/RP…
GO:0043043	GO:0043043	peptide biosynthetic process	153	-0.599182	-3.47429	1.5398e-25	1.30113e-23	4.86251e-24	237	tags=45%, list=9%, signal=44%	EIF3K/RPS18/RPL10/RPL23A/RPS5/RPL39/RPS19/EIF3F/RSL24D1/RPS7/RPS8/RPS24/RPS4Y1/EEF1B2/EIF4A2/RPL8/RPL36AL/RPS9/LOC712274/RPL4/RPL11/RPL18/LOC107000401/EIF3E/RPL10A/RPL13A/RPL41/RPS23/RPL15/RPS16/RPL12/RPL30/RPL36/RPL17/FAU/RPS4X/RPL6/RPL27/RPS15/RPL9/UBA52/RPS20/RPL38/RPS13/RPL22/RPL21/RPL3/RPL5/RPL14/RPL26/RPS12/RPSA/RPS29/RPS2/EEF1G/RPL19/RPL34/LOC703455/RPS28/RPS21/RPL28/RPL35A/EEF1A1/RPS27/RP…
GO:0043604	GO:0043604	amide biosynthetic process	164	-0.575312	-3.37092	3.1006e-24	1.74667e-22	6.52757e-23	237	tags=44%, list=9%, signal=42%	EIF3K/RPS18/RPL10/RPL23A/RPS5/ST6GALNAC5/RPL39/RPS19/EIF3F/RSL24D1/RPS7/RPS8/RPS24/RPS4Y1/EEF1B2/EIF4A2/RPL8/RPL36AL/RPS9/LOC712274/RPL4/RPL11/RPL18/LOC107000401/EIF3E/RPL10A/RPL13A/RPL41/RPS23/RPL15/RPS16/RPL12/RPL30/RPL36/RPL17/FAU/RPS4X/RPL6/PDK1/RPL27/RPS15/RPL9/UBA52/RPS20/RPL38/RPS13/RPL22/RPL21/RPL3/RPL5/RPL14/RPL26/RPS12/RPSA/RPS29/RPS2/EEF1G/RPL19/RPL34/LOC703455/RPS28/RPS21/RPL28/RPL35A…
GO:0006518	GO:0006518	peptide metabolic process	164	-0.573937	-3.36286	4.59376e-24	1.94086e-22	7.25331e-23	237	tags=42%, list=9%, signal=41%	EIF3K/RPS18/RPL10/RPL23A/RPS5/RPL39/RPS19/EIF3F/RSL24D1/RPS7/RPS8/RPS24/RPS4Y1/EEF1B2/EIF4A2/RPL8/RPL36AL/RPS9/LOC712274/RPL4/RPL11/RPL18/LOC107000401/EIF3E/RPL10A/RPL13A/RPL41/RPS23/RPL15/RPS16/RPL12/RPL30/RPL36/RPL17/FAU/RPS4X/RPL6/RPL27/RPS15/RPL9/UBA52/RPS20/RPL38/RPS13/RPL22/RPL21/RPL3/RPL5/RPL14/RPL26/RPS12/RPSA/RPS29/RPS2/EEF1G/RPL19/RPL34/LOC703455/RPS28/RPS21/RPL28/RPL35A/EEF1A1/RPS27/RP…
GO:0043603	GO:0043603	amide metabolic process	180	-0.541075	-3.20427	4.99467e-23	1.6882e-21	6.30906e-22	237	tags=40%, list=9%, signal=39%	EIF3K/RPS18/RPL10/RPL23A/RPS5/ST6GALNAC5/RPL39/RPS19/EIF3F/RSL24D1/RPS7/RPS8/RPS24/RPS4Y1/EEF1B2/EIF4A2/RPL8/RPL36AL/RPS9/LOC712274/RPL4/RPL11/RPL18/LOC107000401/EIF3E/RPL10A/RPL13A/RPL41/RPS23/RPL15/RPS16/RPL12/RPL30/RPL36/RPL17/FAU/RPS4X/RPL6/PDK1/RPL27/RPS15/RPL9/UBA52/RPS20/RPL38/RPS13/RPL22/RPL21/RPL3/RPL5/RPL14/RPL26/RPS12/RPSA/RPS29/RPS2/EEF1G/RPL19/RPL34/LOC703455/RPS28/RPS21/RPL28/RPL35A…
GO:1901566	GO:1901566	organonitrogen compound biosynthetic process	240	-0.462763	-2.89799	3.86435e-19	1.08846e-17	4.06774e-18	242	tags=33%, list=9%, signal=33%	ADSL/EIF3K/RPS18/RPL10/RFK/RPL23A/RPS5/ST6GALNAC5/RPL39/RPS19/EIF3F/RSL24D1/RPS7/RPS8/ATP5MG/RPS24/RPS4Y1/EEF1B2/EIF4A2/RPL8/RPL36AL/RPS9/LOC712274/ATP5MC2/XYLT1/RPL4/RPL11/RPL18/LOC107000401/EIF3E/ATP5ME/RPL10A/RPL13A/RPL41/RPS23/RPL15/RPS16/RPL12/RPL30/RPL36/RPL17/FAU/RPS4X/RPL6/ATP5F1E/PDK1/RPL27/RPS15/RPL9/UBA52/RPS20/RPL38/RPS13/RPL22/RPL21/RPL3/RPL5/RPL14/RPL26/RPS12/RPSA/RPS29/RPS2/EEF1G/R…
GO:0044271	GO:0044271	cellular nitrogen compound biosynthetic process	498	-0.278753	-1.86288	3.85613e-09	9.30981e-08	3.47922e-08	334	tags=22%, list=12%, signal=23%	ATP5F1D/IRF9/LBH/LOC719242/CCT3/PFDN5/ATP5PF/SMPD2/SUB1/POLR1D/MDFIC/CHD7/CYLD/CD38/IGBP1/SATB1/LOC719232/C1QBP/RPS4Y2/ADSL/MYC/EIF3K/RPS18/RPL10/RFK/RPL23A/RPS5/CIB1/ST6GALNAC5/RPL39/RPS19/EIF3F/MSL3/RSL24D1/RPS7/RPS8/ATP5MG/RPS24/RPS4Y1/EEF1B2/CRLF3/EIF4A2/RPL8/MAF1/RPL36AL/RPS9/LOC712274/ATP5MC2/ATF7IP2/RPL4/RPL11/RPL18/LOC107000401/EIF3E/KLF3/ATP5ME/RPL10A/HINT1/MALT1/RPL13A/RPL41/RPS23/RPL15…
GO:0007154	GO:0007154	cell communication	438	0.322236	1.92082	1.1408e-08	2.40994e-07	9.00632e-08	579	tags=31%, list=21%, signal=29%	S100A4/STAT4/PDE3B/ANK3/RGS1/PARP8/NR3C1/FOS/DUSP1/ARHGAP26/MAPRE2/YWHAZ/EXT1/PRKCA/PDE4D/CD44/SRGN/RASGEF1B/LMNA/GNAQ/TOB1/SH3RF2/GNG2/AHR/RBPJ/PPP3CA/FBXW7/LMBR1/PPP1R12A/FUT8/PELI1/MGAT5/NR4A2/MCTP2/RAP1B/LGALS3/NFATC2/ZFP36/NFKB1/TNFAIP3/PDE7A/SRGAP2/NFATC3/FAS/CHST11/CYSLTR1/HSPA5/RPS6KA3/ACTN4/FOXO1/BTBD9/JUN/CD74/ELMO1/PMAIP1/ARHGEF6/BCLAF1/PTPN1/CD28/TSPAN5/OSBPL8/ARHGAP5/TFRC/LPXN/RASGRP…
GO:0023052	GO:0023052	signaling	431	0.325128	1.93805	1.45188e-08	2.72631e-07	1.01886e-07	579	tags=32%, list=21%, signal=30%	S100A4/STAT4/PDE3B/ANK3/RGS1/PARP8/NR3C1/FOS/DUSP1/ARHGAP26/MAPRE2/YWHAZ/EXT1/PRKCA/PDE4D/CD44/SRGN/RASGEF1B/LMNA/GNAQ/TOB1/SH3RF2/GNG2/AHR/RBPJ/PPP3CA/FBXW7/LMBR1/PPP1R12A/FUT8/PELI1/MGAT5/NR4A2/MCTP2/RAP1B/LGALS3/NFATC2/ZFP36/NFKB1/TNFAIP3/PDE7A/SRGAP2/NFATC3/FAS/CHST11/CYSLTR1/HSPA5/RPS6KA3/ACTN4/FOXO1/BTBD9/JUN/CD74/ELMO1/PMAIP1/ARHGEF6/BCLAF1/PTPN1/CD28/TSPAN5/OSBPL8/ARHGAP5/TFRC/LPXN/RASGRP…
GO:0007165	GO:0007165	signal transduction	413	0.313812	1.86582	1.32181e-06	2.23387e-05	8.34831e-06	612	tags=32%, list=22%, signal=29%	S100A4/STAT4/PDE3B/ANK3/RGS1/PARP8/FOS/DUSP1/ARHGAP26/MAPRE2/YWHAZ/EXT1/PRKCA/PDE4D/CD44/SRGN/RASGEF1B/LMNA/GNAQ/TOB1/SH3RF2/GNG2/AHR/RBPJ/PPP3CA/FBXW7/LMBR1/PPP1R12A/FUT8/PELI1/MGAT5/NR4A2/RAP1B/LGALS3/NFATC2/ZFP36/NFKB1/TNFAIP3/PDE7A/SRGAP2/NFATC3/FAS/CHST11/CYSLTR1/HSPA5/RPS6KA3/ACTN4/FOXO1/JUN/CD74/ELMO1/PMAIP1/ARHGEF6/BCLAF1/PTPN1/CD28/TSPAN5/OSBPL8/ARHGAP5/TFRC/LPXN/RASGRP1/PNPLA8/STK17B/CH…
GO:0009719	GO:0009719	response to endogenous stimulus	105	0.434891	2.14887	5.42421e-06	7.61265e-05	2.84496e-05	573	tags=42%, list=21%, signal=34%	NR3C1/FOS/EXT1/CD44/GNAQ/TOB1/AHR/RBPJ/FUT8/TNFSF4/NR4A2/RAP1B/ZFP36/NFKB1/CHST11/ATP2B1/HSPA5/FOXO1/JUN/PTPN1/OSBPL8/LPXN/HNRNPU/ITPR1/CAPN2/HSP90B1/ROCK1/STXBP4/GSK3B/NOTCH2/ERN1/GRB2/SMYD3/SMAD3/USP9X/TGFBR2/PDE8A/ZFP36L2/UBR1/RAP1GDS1/RPTOR/VIM/SYAP1/ATP2B4
GO:0071495	GO:0071495	cellular response to endogenous stimulus	104	0.438154	2.14877	5.27023e-06	7.61265e-05	2.84496e-05	573	tags=42%, list=21%, signal=35%	NR3C1/FOS/EXT1/CD44/GNAQ/TOB1/AHR/RBPJ/FUT8/TNFSF4/NR4A2/RAP1B/ZFP36/NFKB1/CHST11/ATP2B1/HSPA5/FOXO1/JUN/PTPN1/OSBPL8/LPXN/HNRNPU/ITPR1/CAPN2/HSP90B1/ROCK1/STXBP4/GSK3B/NOTCH2/ERN1/GRB2/SMYD3/SMAD3/USP9X/TGFBR2/PDE8A/ZFP36L2/UBR1/RAP1GDS1/RPTOR/VIM/SYAP1/ATP2B4
GO:0032502	GO:0032502	developmental process	345	0.308468	1.7979	5.85588e-06	7.61265e-05	2.84496e-05	582	tags=30%, list=21%, signal=27%	PDE3B/NR3C1/FOS/DUSP1/YWHAZ/EXT1/PRKCA/PDE4D/CD44/SRGN/LMNA/TOB1/DDX3Y/RBPJ/FBXW7/LMBR1/SH3KBP1/NR4A2/RAP1B/IMMP2L/LGALS3/NFATC2/ZFP36/ID2/NFKB1/RUNX1/TNFAIP3/SRGAP2/NFATC3/CHST11/ATP2B1/HSPA5/IKZF3/ACTN4/HUWE1/NDEL1/JUN/CD74/PTBP3/PSME4/ACSL4/CD28/FOXN2/OSBPL8/TFRC/BTG2/PRKCH/PTPN9/CHSY1/ZHX2/HERC4/ARRDC3/HNRNPU/MAP4/PAK2/ITPR1/MYH9/CAPN2/IRF1/EMB/CARD11/ROCK1/TESC/FNDC3A/FRYL/DLG1/FOXO3/GSK3B/N…
GO:0032501	GO:0032501	multicellular organismal process	360	0.292289	1.71026	5.8357e-05	0.000704452	0.000263265	471	tags=24%, list=17%, signal=23%	PDE3B/NR3C1/FOS/DUSP1/MAPRE2/YWHAZ/EXT1/PRKCA/PDE4D/CD44/SRGN/LMNA/TOB1/SLAMF1/DDX3Y/AHR/RBPJ/FBXW7/LMBR1/FUT8/PELI1/SH3KBP1/TNFSF4/NR4A2/IMMP2L/LGALS3/NFATC2/ZFP36/NFKB1/RUNX1/TNFAIP3/SRGAP2/NFATC3/FAS/CHST11/ATP2B1/HSPA5/IKZF3/BTBD9/JUN/CD74/PSME4/CD2/ACSL4/CD28/TFRC/LPXN/BTG2/PTPN9/CHSY1/GLS/ZHX2/HERC4/ARRDC3/HNRNPU/MAP4/PAK2/ITPR1/MYH9/CAPN2/IRF1/EMB/CARD11/ROCK1/PJA2/TESC/FNDC3A/DLG1/SLA2/FO…
GO:0048856	GO:0048856	anatomical structure development	315	0.299611	1.73029	6.68486e-05	0.000753161	0.000281468	471	tags=25%, list=17%, signal=23%	PDE3B/NR3C1/FOS/DUSP1/YWHAZ/EXT1/PRKCA/PDE4D/CD44/SRGN/LMNA/RBPJ/FBXW7/LMBR1/SH3KBP1/NR4A2/RAP1B/IMMP2L/LGALS3/NFATC2/ZFP36/NFKB1/RUNX1/TNFAIP3/SRGAP2/NFATC3/CHST11/ATP2B1/HSPA5/IKZF3/ACTN4/HUWE1/JUN/CD74/PSME4/ACSL4/CD28/FOXN2/TFRC/BTG2/PTPN9/CHSY1/ZHX2/ARRDC3/HNRNPU/MAP4/PAK2/ITPR1/MYH9/CAPN2/IRF1/EMB/CARD11/ROCK1/TESC/FNDC3A/FRYL/DLG1/FOXO3/GSK3B/NOTCH2/TOP1/ZZZ3/GRB2/MBNL3/OGDH/GNB1/SMYD3/CBL…
GO:0009653	GO:0009653	anatomical structure morphogenesis	144	0.358937	1.85669	7.96119e-05	0.0008409	0.000314257	577	tags=33%, list=21%, signal=28%	PDE3B/NR3C1/DUSP1/YWHAZ/EXT1/PRKCA/CD44/RBPJ/FBXW7/LMBR1/SH3KBP1/NR4A2/NFATC2/NFKB1/TNFAIP3/SRGAP2/CHST11/HSPA5/HUWE1/JUN/TFRC/CHSY1/ZHX2/PAK2/ITPR1/MYH9/CAPN2/EMB/ROCK1/FRYL/DLG1/FOXO3/NOTCH2/GRB2/MTM1/MEF2A/SMAD3/ZRANB1/USP9X/TGFBR2/B4GALT1/PBX3/ARHGAP15/MATR3/EXOC4/ATP2B4/KDM6A/RERE
GO:0048869	GO:0048869	cellular developmental process	233	0.316582	1.75687	9.89581e-05	0.00098376	0.000367646	519	tags=30%, list=19%, signal=26%	NR3C1/FOS/YWHAZ/EXT1/PDE4D/LMNA/TOB1/DDX3Y/RBPJ/FBXW7/NR4A2/RAP1B/LGALS3/NFATC2/ZFP36/ID2/RUNX1/SRGAP2/NFATC3/CHST11/IKZF3/ACTN4/NDEL1/JUN/CD74/PTBP3/PSME4/ACSL4/CD28/FOXN2/OSBPL8/TFRC/BTG2/PRKCH/PTPN9/CHSY1/ZHX2/HNRNPU/MAP4/PAK2/MYH9/CAPN2/IRF1/EMB/CARD11/ROCK1/TESC/FNDC3A/FOXO3/GSK3B/NOTCH2/GRB2/MBNL3/OGDH/SMYD3/L3MBTL3/MEF2A/YWHAG/RBL2/SMAD3/USP9X/TGFBR2/PIAS1/CDK6/AFF4/FNIP1/B4GALT1/PBX3/ZFP3…
GO:0007275	GO:0007275	multicellular organism development	247	0.307733	1.72796	0.000115331	0.00108283	0.000404672	471	tags=25%, list=17%, signal=22%	PDE3B/NR3C1/FOS/DUSP1/YWHAZ/EXT1/PRKCA/CD44/SRGN/LMNA/RBPJ/FBXW7/LMBR1/NR4A2/IMMP2L/NFATC2/ZFP36/RUNX1/TNFAIP3/SRGAP2/NFATC3/CHST11/ATP2B1/HSPA5/IKZF3/JUN/CD74/ACSL4/CD28/TFRC/BTG2/PTPN9/CHSY1/ZHX2/HNRNPU/MAP4/PAK2/ITPR1/MYH9/CAPN2/IRF1/EMB/CARD11/ROCK1/TESC/DLG1/FOXO3/GSK3B/NOTCH2/TOP1/ZZZ3/GRB2/OGDH/GNB1/CBLB/MEF2A/YWHAG/SMAD3/RICTOR/USP9X/TGFBR2
GO:0080090	GO:0080090	regulation of primary metabolic process	483	0.260891	1.56991	0.000153844	0.0013684	0.000511393	744	tags=34%, list=27%, signal=30%	PDE3B/NR3C1/FOS/FOSB/DUSP1/YWHAZ/PRKCA/CD44/GNAQ/TOB1/SH3RF2/DNAJC1/AHR/RBPJ/FBXW7/ETV6/PPP1R12A/PELI1/MGAT5/NR4A2/NFATC2/ZFP36/ID2/ZBTB38/NFKB1/RUNX1/TNFAIP3/NCOA2/NFATC3/FAS/PPP1R15A/CCNL1/HSPA5/IKZF3/HUWE1/FOXO1/JUN/CD74/PMAIP1/PTBP3/BCLAF1/PTPN1/FUBP1/CD28/KLF6/FOXN2/OSBPL8/SMARCA2/ELOVL5/TFRC/BTG2/PRKCH/BHLHE40/USP36/RNF19A/APBB2/JMY/ZHX2/CDK17/ARRDC3/ZEB1/HNRNPU/EED/PAK2/TSPYL2/NR3C2/MYH9/I…
GO:0048513	GO:0048513	animal organ development	126	0.363413	1.85171	0.000210768	0.00169618	0.000633888	577	tags=33%, list=21%, signal=28%	NR3C1/FOS/YWHAZ/EXT1/CD44/SRGN/LMNA/RBPJ/FBXW7/NR4A2/IMMP2L/ZFP36/NFKB1/TNFAIP3/SRGAP2/CHST11/ATP2B1/HSPA5/JUN/FOXN2/BTG2/CHSY1/ZHX2/ARRDC3/HNRNPU/ROCK1/DLG1/FOXO3/GSK3B/NOTCH2/GRB2/OGDH/GNB1/MEF2A/SMAD3/TGFBR2/PBX3/MATR3/VIM/EXOC4/KDM6A/RERE
GO:0048523	GO:0048523	negative regulation of cellular process	372	0.275133	1.61862	0.000208809	0.00169618	0.000633888	744	tags=35%, list=27%, signal=30%	PDE3B/DUSP1/SKAP2/YWHAZ/PRKCA/PDE4D/CD44/SRGN/LMNA/GNAQ/TOB1/SH3RF2/RBPJ/FBXW7/PELI1/MGAT5/TNFSF4/NR4A2/RAP1B/LGALS3/NFATC2/ZFP36/ID2/ZBTB38/NFKB1/TNFAIP3/SRGAP2/NFATC3/FAS/PPP1R15A/CHST11/ATP2B1/HSPA5/ACTN4/HUWE1/FOXO1/JUN/CD74/BCLAF1/PTPN1/CD28/OSBPL8/SMARCA2/TFRC/LPXN/BTG2/PTPN9/USP36/APBB2/ZHX2/HERC4/ARRDC3/ZEB1/HNRNPU/EED/OXSR1/PAK2/ITPR1/TSPYL2/MYH9/IRF1/YTHDC1/HSP90B1/ROCK1/TESC/DLG1/ARFGE…
GO:0030154	GO:0030154	cell differentiation	232	0.314026	1.74162	0.000242723	0.00186455	0.000696812	519	tags=29%, list=19%, signal=26%	NR3C1/FOS/YWHAZ/EXT1/PDE4D/LMNA/TOB1/DDX3Y/RBPJ/FBXW7/NR4A2/RAP1B/LGALS3/NFATC2/ZFP36/ID2/RUNX1/SRGAP2/NFATC3/CHST11/IKZF3/ACTN4/NDEL1/JUN/CD74/PTBP3/PSME4/ACSL4/CD28/FOXN2/OSBPL8/TFRC/BTG2/PRKCH/PTPN9/CHSY1/ZHX2/HNRNPU/MAP4/PAK2/MYH9/CAPN2/IRF1/EMB/CARD11/ROCK1/TESC/FNDC3A/FOXO3/GSK3B/NOTCH2/GRB2/MBNL3/OGDH/SMYD3/L3MBTL3/MEF2A/YWHAG/RBL2/SMAD3/USP9X/TGFBR2/PIAS1/AFF4/FNIP1/B4GALT1/PBX3/ZFP36L2
GO:0048519	GO:0048519	negative regulation of biological process	395	0.26917	1.59038	0.000285503	0.00209783	0.00078399	631	tags=30%, list=23%, signal=27%	PDE3B/DUSP1/SKAP2/YWHAZ/PRKCA/PDE4D/CD44/SRGN/LMNA/GNAQ/TOB1/SH3RF2/AHR/RBPJ/FBXW7/PELI1/MGAT5/TNFSF4/NR4A2/RAP1B/LGALS3/NFATC2/ZFP36/ID2/ZBTB38/NFKB1/TNFAIP3/SRGAP2/NFATC3/FAS/PPP1R15A/CHST11/ATP2B1/HSPA5/ACTN4/HUWE1/FOXO1/JUN/CD74/BCLAF1/PTPN1/CD28/OSBPL8/SMARCA2/TFRC/LPXN/BTG2/PTPN9/CHSY1/USP36/APBB2/ZHX2/HERC4/ARRDC3/ZEB1/HNRNPU/EED/OXSR1/PAK2/ITPR1/TSPYL2/MYH9/IRF1/YTHDC1/HSP90B1/ROCK1/TESC/…
GO:0051247	GO:0051247	positive regulation of protein metabolic process	111	0.372635	1.85751	0.000340257	0.00237019	0.000885777	574	tags=38%, list=21%, signal=31%	CD44/TOB1/SH3RF2/FBXW7/PPP1R12A/PELI1/TNFAIP3/FAS/PPP1R15A/HSPA5/HUWE1/FOXO1/CD74/PMAIP1/PTPN1/OSBPL8/TFRC/RNF19A/ARRDC3/HNRNPU/PAK2/MYH9/DLG1/GSK3B/NOTCH2/ERN1/SMYD3/CBLB/L3MBTL3/ABI1/SMAD3/RICTOR/TGFBR2/PIAS1/FNIP1/ANKIB1/RAF1/RPTOR/VIM/SYAP1/ATP2B4/FAF1
GO:0031399	GO:0031399	regulation of protein modification process	111	0.37181	1.8534	0.00035062	0.00237019	0.000885777	785	tags=47%, list=29%, signal=35%	DUSP1/CD44/GNAQ/SH3RF2/FBXW7/PPP1R12A/PELI1/MGAT5/TNFAIP3/PPP1R15A/HSPA5/HUWE1/JUN/CD74/PTPN1/OSBPL8/TFRC/ARRDC3/PAK2/TSPYL2/HSP90B1/ROCK1/DLG1/IVNS1ABP/GSK3B/NOTCH2/ERN1/ZZZ3/SMYD3/CBLB/ABI1/RICTOR/TGFBR2/PIAS1/FNIP1/RAF1/RPTOR/CCNY/SYAP1/ATP2B4/CDK12/DNAJC3/PPP6R3/KANSL1/UBASH3B/DNAJA1/UVRAG/CUL3/SIRT1/AMBRA1/UBQLN1/CAB39
GO:0070887	GO:0070887	cellular response to chemical stimulus	191	0.317983	1.71566	0.000372039	0.00241825	0.000903737	420	tags=25%, list=15%, signal=22%	PARP8/NR3C1/FOS/FOSB/DUSP1/EXT1/PRKCA/LMNA/GNAQ/AHR/RBPJ/PPP1R12A/FUT8/TNFSF4/NR4A2/RAP1B/LGALS3/ZFP36/NFKB1/TNFAIP3/ATP2B1/HSPA5/ACTN4/FOXO1/JUN/CD74/BCLAF1/PTPN1/OSBPL8/TFRC/PNPLA8/HNRNPU/OXSR1/PAK2/ITPR1/CAPN2/IRF1/HSP90B1/ROCK1/TESC/STXBP4/FOXO3/GSK3B/LRCH1/ERN1/GRB2/SMYD3
GO:0035556	GO:0035556	intracellular signal transduction	254	0.29678	1.66803	0.000408264	0.00246416	0.000920895	573	tags=31%, list=21%, signal=27%	S100A4/PDE3B/FOS/DUSP1/MAPRE2/YWHAZ/PRKCA/PDE4D/CD44/RASGEF1B/TOB1/SH3RF2/AHR/PPP3CA/FBXW7/PELI1/RAP1B/NFATC2/ZFP36/NFKB1/TNFAIP3/PDE7A/NFATC3/FAS/RPS6KA3/ACTN4/FOXO1/JUN/CD74/ELMO1/ARHGEF6/BCLAF1/PTPN1/CD28/OSBPL8/TFRC/RASGRP1/PNPLA8/STK17B/SNRK/JMY/ARRDC3/OXSR1/PAK2/ITPR1/NR3C2/ABR/CARD11/ROCK1/PJA2/DLG1/MAP3K2/ARFGEF1/IVNS1ABP/SLA2/FOXO3/GSK3B/NOTCH2/ERN1/GRB2/RASA2/CBLB/MEF2A/SMAD3/RICTOR/USP…
GO:0036211	GO:0036211	protein modification process	380	0.267684	1.57647	0.000408103	0.00246416	0.000920895	887	tags=42%, list=32%, signal=33%	PARP8/DUSP1/EXT1/PRKCA/CD44/NEDD4L/GNAQ/SH3RF2/SIK3/FBXW7/PPP1R12A/FUT8/PELI1/MGAT5/ZDHHC14/ITCH/NEK7/TNFAIP3/NEDD4/PPP1R15A/HSPA5/RPS6KA3/HUWE1/JUN/CD74/PTPN1/OSBPL8/TFRC/BTG2/PRKCH/PTPN9/STK17B/CASK/USP36/RNF19A/SNRK/CDK17/HERC4/ARRDC3/DYRK1A/OXSR1/ST8SIA4/PAK2/TSPYL2/HSP90B1/MAN1A2/ROCK1/PJA2/UBR5/OGA/UBE2H/DLG1/MINDY3/MAP3K2/ARFGEF1/TNIK/IVNS1ABP/PTPN22/VRK1/SRPK2/PTP4A1/GSK3B/MSL2/NOTCH2/TOP…
GO:0051246	GO:0051246	regulation of protein metabolic process	198	0.312575	1.69245	0.000427239	0.00248977	0.000930466	785	tags=41%, list=29%, signal=32%	DUSP1/CD44/GNAQ/TOB1/SH3RF2/DNAJC1/FBXW7/PPP1R12A/PELI1/MGAT5/ZFP36/TNFAIP3/FAS/PPP1R15A/HSPA5/HUWE1/FOXO1/JUN/CD74/PMAIP1/BCLAF1/PTPN1/OSBPL8/TFRC/BTG2/RNF19A/ARRDC3/HNRNPU/PAK2/TSPYL2/MYH9/HSP90B1/XPO1/ROCK1/DLG1/IVNS1ABP/GSK3B/NOTCH2/ERN1/ZZZ3/SMYD3/CBLB/L3MBTL3/ABI1/SMAD3/RICTOR/USP9X/TGFBR2/PIAS1/IFI6/ZFP36L1/FNIP1/ANKIB1/ZFP36L2/RAF1/ETF1/RPTOR/VIM/CCNY/SYAP1/ATP2B4/FAF1/CDK12/AZIN1/FHIT/DN…
GO:0048468	GO:0048468	cell development	164	0.329403	1.73078	0.000631335	0.00355652	0.00132913	519	tags=30%, list=19%, signal=26%	NR3C1/FOS/YWHAZ/EXT1/PDE4D/LMNA/RBPJ/FBXW7/NR4A2/RAP1B/NFATC2/ZFP36/RUNX1/SRGAP2/CHST11/IKZF3/ACTN4/JUN/CD74/PSME4/CD28/TFRC/BTG2/PTPN9/CHSY1/HNRNPU/MAP4/PAK2/MYH9/IRF1/EMB/CARD11/ROCK1/TESC/FNDC3A/FOXO3/GSK3B/NOTCH2/OGDH/SMYD3/L3MBTL3/MEF2A/SMAD3/USP9X/TGFBR2/AFF4/FNIP1/B4GALT1/PBX3/ZFP36L2
GO:0051171	GO:0051171	regulation of nitrogen compound metabolic process	474	0.253417	1.52339	0.000666252	0.00363215	0.00135739	744	tags=34%, list=27%, signal=30%	NR3C1/FOS/FOSB/DUSP1/YWHAZ/CD44/GNAQ/TOB1/SH3RF2/DNAJC1/AHR/RBPJ/FBXW7/ETV6/PPP1R12A/PELI1/MGAT5/NR4A2/NFATC2/ZFP36/ID2/ZBTB38/NFKB1/RUNX1/TNFAIP3/NCOA2/NFATC3/FAS/PPP1R15A/CCNL1/HSPA5/IKZF3/HUWE1/FOXO1/JUN/CD74/PMAIP1/PTBP3/BCLAF1/PTPN1/FUBP1/CD28/KLF6/FOXN2/OSBPL8/SMARCA2/TFRC/BTG2/BHLHE40/USP36/RNF19A/APBB2/JMY/ZHX2/CDK17/ARRDC3/ZEB1/HNRNPU/EED/PAK2/TSPYL2/NR3C2/MYH9/IRF1/ZNF644/YTHDC1/HSP90B1…
GO:0006468	GO:0006468	protein phosphorylation	160	0.33079	1.73142	0.000738504	0.00390022	0.00145757	1015	tags=56%, list=37%, signal=38%	DUSP1/PRKCA/CD44/GNAQ/SIK3/FBXW7/NEK7/TNFAIP3/RPS6KA3/JUN/CD74/PTPN1/OSBPL8/TFRC/PRKCH/STK17B/CASK/SNRK/CDK17/DYRK1A/OXSR1/PAK2/TSPYL2/ROCK1/DLG1/MAP3K2/TNIK/VRK1/SRPK2/GSK3B/NOTCH2/TOP1/ERN1/SMYD3/CBLB/ABI1/RICTOR/TGFBR2/CDK6/FNIP1/LATS1/PRPF4B/RAF1/CSNK1G3/RPTOR/CSNK1G1/CCNY/SYAP1/ATP2B4/PKN2/CDK12/TGFBR1/DNAJC3/STK26/AKT3/TAOK3/MTOR/SIK1/UBASH3B/JAK2/DNAJA1/ST3GAL1/UVRAG/SMG1/SIRT1/RPS6KB1/CLK…
GO:0007166	GO:0007166	cell surface receptor signaling pathway	180	0.313185	1.67437	0.000761836	0.00390152	0.00145806	487	tags=29%, list=18%, signal=25%	FOS/EXT1/PRKCA/PDE4D/LMNA/GNAQ/TOB1/RBPJ/FBXW7/FUT8/PELI1/MGAT5/LGALS3/NFATC2/NFKB1/TNFAIP3/FAS/CHST11/CYSLTR1/HSPA5/ACTN4/FOXO1/JUN/CD74/PTPN1/CD28/TSPAN5/OSBPL8/LPXN/CHSY1/HERC4/OXSR1/PAK2/IRF1/CARD11/PJA2/STXBP4/SLA2/PTPN22/FOXO3/GSK3B/FYB1/NOTCH2/GRB2/CBLB/SMAD3/ITGB1/ZRANB1/USP9X/TGFBR2/IFI6/BCL2A1
GO:0010604	GO:0010604	positive regulation of macromolecule metabolic process	283	0.278652	1.5893	0.000799611	0.00397454	0.00148534	582	tags=29%, list=21%, signal=25%	NR3C1/FOS/PDE4D/CD44/LMNA/TOB1/SH3RF2/AHR/RBPJ/FBXW7/PPP1R12A/PELI1/TNFSF4/NFATC2/ZFP36/NFKB1/RUNX1/TNFAIP3/NCOA2/FAS/PPP1R15A/HSPA5/HUWE1/FOXO1/JUN/CD74/PMAIP1/BCLAF1/PTPN1/CD2/CD28/OSBPL8/SMARCA2/TFRC/BTG2/RNF19A/APBB2/ARRDC3/HNRNPU/PAK2/MYH9/IRF1/CARD11/ROCK1/TESC/DLG1/NAMPT/FOXO3/GSK3B/MSL2/NOTCH2/ERN1/SMYD3/CBLB/TRA2A/L3MBTL3/MEF2A/ABI1/SMAD3/RICTOR/CCNK/USP9X/TGFBR2/PIAS1/ZFP36L1/KDM5A/FNIP…
GO:0051239	GO:0051239	regulation of multicellular organismal process	173	0.313821	1.66488	0.000872211	0.00421153	0.00157391	343	tags=21%, list=13%, signal=20%	PDE3B/FOS/MAPRE2/PRKCA/PDE4D/SRGN/LMNA/AHR/RBPJ/FBXW7/PELI1/SH3KBP1/TNFSF4/NR4A2/LGALS3/NFATC2/ZFP36/NFKB1/RUNX1/TNFAIP3/ATP2B1/IKZF3/JUN/CD74/CD2/CD28/TFRC/BTG2/CHSY1/GLS/ARRDC3/IRF1/CARD11/ROCK1/PJA2/TESC/DLG1
GO:0009892	GO:0009892	negative regulation of metabolic process	239	0.290901	1.61736	0.000988953	0.00464258	0.001735	743	tags=37%, list=27%, signal=29%	PDE3B/DUSP1/YWHAZ/CD44/SRGN/LMNA/GNAQ/TOB1/SH3RF2/RBPJ/FBXW7/MGAT5/TNFSF4/NR4A2/ZFP36/ID2/ZBTB38/NFKB1/TNFAIP3/NFATC3/PPP1R15A/ATP2B1/JUN/BCLAF1/PTPN1/CD28/SMARCA2/BTG2/USP36/APBB2/ZHX2/ARRDC3/ZEB1/HNRNPU/EED/PAK2/TSPYL2/IRF1/YTHDC1/ROCK1/DLG1/SMG6/IVNS1ABP/SLA2/GSK3B/NOTCH2/PHF21A/SMYD3/CBLB/PDS5A/MTM1/L3MBTL3/MEF2A/RBL2/SMAD3/SND1/ZNF827/USP9X/PIAS1/IFI6/ZFP36L1/FNIP1/PSPC1/ZFP36L2/ETF1/VIM/ATP…
GO:0071310	GO:0071310	cellular response to organic substance	150	0.326634	1.70678	0.00107427	0.00477769	0.0017855	420	tags=25%, list=15%, signal=23%	PARP8/NR3C1/DUSP1/EXT1/PRKCA/GNAQ/AHR/TNFSF4/NR4A2/RAP1B/ZFP36/NFKB1/TNFAIP3/ATP2B1/HSPA5/ACTN4/FOXO1/JUN/CD74/BCLAF1/PTPN1/OSBPL8/TFRC/HNRNPU/OXSR1/PAK2/ITPR1/CAPN2/IRF1/HSP90B1/ROCK1/TESC/STXBP4/GSK3B/LRCH1/ERN1/GRB2/SMYD3
GO:0008283	GO:0008283	cell population proliferation	169	0.311623	1.64644	0.00106038	0.00477769	0.0017855	485	tags=28%, list=18%, signal=24%	SKAP2/EXT1/PRKCA/CD44/LMNA/TOB1/AHR/RBPJ/PELI1/NR4A2/RAP1B/LGALS3/NFATC2/ZFP36/TNFAIP3/SRGAP2/CHST11/IKZF3/JUN/CD74/CD28/SMARCA2/TFRC/BTG2/PTPN9/HNRNPU/MAP4/PAK2/MYH9/IRF1/EMB/CARD11/ROCK1/TESC/STXBP4/DLG1/FOXO3/GSK3B/NOTCH2/ERN1/GNB1/CBLB/SMAD3/USP9X/TGFBR2/PIAS1/CDK6
GO:0043412	GO:0043412	macromolecule modification	390	0.260828	1.54089	0.00129782	0.00562389	0.00210174	990	tags=46%, list=36%, signal=34%	PARP8/DUSP1/EXT1/PRKCA/CD44/NEDD4L/GNAQ/SH3RF2/SIK3/FBXW7/PPP1R12A/FUT8/PELI1/MGAT5/ZDHHC14/ITCH/NEK7/TNFAIP3/NEDD4/PPP1R15A/HSPA5/RPS6KA3/HUWE1/JUN/CD74/PTPN1/OSBPL8/TFRC/BTG2/PRKCH/PTPN9/STK17B/CASK/USP36/RNF19A/SNRK/CDK17/HERC4/ARRDC3/DYRK1A/OXSR1/ST8SIA4/PAK2/TSPYL2/HSP90B1/MAN1A2/ROCK1/PJA2/UBR5/OGA/UBE2H/DLG1/MINDY3/MAP3K2/ARFGEF1/TNIK/IVNS1ABP/PTPN22/VRK1/SRPK2/PTP4A1/GSK3B/MSL2/NOTCH2/TOP…
GO:0050790	GO:0050790	regulation of catalytic activity	143	0.327884	1.69158	0.00134183	0.0056322	0.00210484	582	tags=35%, list=21%, signal=29%	RGS1/DUSP1/MAPRE2/CD44/GNAQ/FBXW7/PPP1R12A/MGAT5/NR4A2/ZFP36/NFKB1/TNFAIP3/SRGAP2/FAS/PPP1R15A/CD74/PMAIP1/PTPN1/OSBPL8/ARRDC3/HNRNPU/PAK2/TSPYL2/ABR/HSP90B1/ROCK1/DLG1/ARFGEF1/GSK3B/RASA1/NOTCH2/LRCH1/ERN1/RASA2/SMYD3/CBLB/RBL2/ABI1/SMAD3/RICTOR/TGFBR2/IFI6/FNIP1/ARHGAP15/RAP1GDS1/RPTOR/CCNY/SYAP1/ATP2B4/CDK12
GO:0048731	GO:0048731	system development	186	0.305161	1.64101	0.00136639	0.0056322	0.00210484	471	tags=24%, list=17%, signal=21%	PDE3B/NR3C1/FOS/YWHAZ/EXT1/PRKCA/CD44/LMNA/RBPJ/FBXW7/NR4A2/IMMP2L/NFATC2/RUNX1/TNFAIP3/SRGAP2/NFATC3/CHST11/HSPA5/JUN/ACSL4/CD28/TFRC/BTG2/PTPN9/CHSY1/ZHX2/HNRNPU/MAP4/PAK2/MYH9/EMB/ROCK1/DLG1/FOXO3/GSK3B/NOTCH2/OGDH/GNB1/CBLB/MEF2A/YWHAG/SMAD3/USP9X/TGFBR2
GO:0050793	GO:0050793	regulation of developmental process	143	0.32734	1.68877	0.00141007	0.00567386	0.00212041	471	tags=27%, list=17%, signal=24%	PDE3B/FOS/PRKCA/CD44/SRGN/TOB1/RBPJ/FBXW7/SH3KBP1/NFATC2/ZFP36/RUNX1/TNFAIP3/NFATC3/ATP2B1/IKZF3/HUWE1/CD74/PTBP3/CD28/TFRC/BTG2/ZHX2/HNRNPU/PAK2/MYH9/IRF1/CARD11/ROCK1/TESC/DLG1/GSK3B/NOTCH2/ZZZ3/MBNL3/YWHAG/SMAD3/ZRANB1/TGFBR2
GO:0065009	GO:0065009	regulation of molecular function	195	0.293049	1.58948	0.00159611	0.0062731	0.00234435	582	tags=32%, list=21%, signal=27%	RGS1/DUSP1/MAPRE2/CD44/GNAQ/FBXW7/PPP1R12A/PELI1/MGAT5/NR4A2/ZFP36/ID2/NFKB1/TNFAIP3/SRGAP2/FAS/PPP1R15A/JUN/CD74/PMAIP1/PTPN1/OSBPL8/TFRC/JMY/ARRDC3/HNRNPU/OXSR1/PAK2/TSPYL2/ABR/HSP90B1/CARD11/ROCK1/TESC/DLG1/ARFGEF1/ATP1B3/GSK3B/RASA1/NOTCH2/LRCH1/ERN1/RASA2/SMYD3/CBLB/RBL2/ABI1/SMAD3/RICTOR/USP9X/TGFBR2/IFI6/KDM5A/FNIP1/ARHGAP15/RAP1GDS1/RPTOR/CCNY/SYAP1/ATP2B4/FAF1/CDK12
GO:0010646	GO:0010646	regulation of cell communication	267	0.282442	1.59741	0.00179079	0.00672542	0.00251339	574	tags=30%, list=21%, signal=26%	S100A4/PDE3B/DUSP1/MAPRE2/PRKCA/PDE4D/CD44/SRGN/LMNA/GNAQ/TOB1/SH3RF2/RBPJ/FBXW7/PELI1/MGAT5/NR4A2/MCTP2/RAP1B/LGALS3/NFKB1/TNFAIP3/FAS/CHST11/HSPA5/ACTN4/FOXO1/BTBD9/JUN/CD74/BCLAF1/PTPN1/CD28/TSPAN5/OSBPL8/TFRC/LPXN/CHSY1/CASK/RNF19A/HERC4/ARRDC3/PAK2/ITPR1/NR3C2/IRF1/CARD11/ROCK1/PJA2/STXBP4/DLG1/ARFGEF1/IVNS1ABP/SLA2/PTPN22/FOXO3/GSK3B/NOTCH2/ERN1/GRB2/RASA2/CBLB/YWHAG/SMAD3/RICTOR/CCNK/ZRANB…
GO:0023051	GO:0023051	regulation of signaling	267	0.282442	1.59741	0.00179079	0.00672542	0.00251339	574	tags=30%, list=21%, signal=26%	S100A4/PDE3B/DUSP1/MAPRE2/PRKCA/PDE4D/CD44/SRGN/LMNA/GNAQ/TOB1/SH3RF2/RBPJ/FBXW7/PELI1/MGAT5/NR4A2/MCTP2/RAP1B/LGALS3/NFKB1/TNFAIP3/FAS/CHST11/HSPA5/ACTN4/FOXO1/BTBD9/JUN/CD74/BCLAF1/PTPN1/CD28/TSPAN5/OSBPL8/TFRC/LPXN/CHSY1/CASK/RNF19A/HERC4/ARRDC3/PAK2/ITPR1/NR3C2/IRF1/CARD11/ROCK1/PJA2/STXBP4/DLG1/ARFGEF1/IVNS1ABP/SLA2/PTPN22/FOXO3/GSK3B/NOTCH2/ERN1/GRB2/RASA2/CBLB/YWHAG/SMAD3/RICTOR/CCNK/ZRANB…
GO:0010468	GO:0010468	regulation of gene expression	422	0.247741	1.47434	0.00234373	0.00861065	0.00321793	586	tags=26%, list=21%, signal=24%	NR3C1/FOS/FOSB/YWHAZ/PDE4D/SRGN/LMNA/TOB1/DNAJC1/AHR/RBPJ/FBXW7/ETV6/PPP1R12A/FUT8/PELI1/TNFSF4/NR4A2/NFATC2/ZFP36/ID2/ZBTB38/NFKB1/RUNX1/TNFAIP3/NCOA2/NFATC3/PPP1R15A/CCNL1/ATP2B1/IKZF3/HUWE1/FOXO1/JUN/CD74/PTBP3/BCLAF1/FUBP1/CD2/CD28/KLF6/FOXN2/SMARCA2/TFRC/BTG2/BHLHE40/USP36/APBB2/JMY/ZHX2/CDK17/ZEB1/HNRNPU/EED/NR3C2/MYH9/IRF1/ZNF644/YTHDC1/CARD11/ROCK1/TESC/DLG1/SMG6/CCNH/SLA2/NAMPT/FOXO3/GSK…
GO:0048584	GO:0048584	positive regulation of response to stimulus	168	0.305501	1.61509	0.00267567	0.00891281	0.00333085	574	tags=32%, list=21%, signal=27%	S100A4/MAPRE2/PRKCA/PDE4D/CD44/SH3RF2/RBPJ/FBXW7/PELI1/MGAT5/TNFSF4/RAP1B/NFATC2/NFKB1/TNFAIP3/ACTN4/JUN/CD74/BCLAF1/PTPN1/CD28/TSPAN5/OSBPL8/TFRC/LPXN/CHSY1/ARRDC3/OXSR1/PAK2/NR3C2/IRF1/CARD11/ROCK1/PJA2/ARFGEF1/SLA2/PTPN22/FOXO3/FYB1/NOTCH2/ERN1/GRB2/CBLB/RICTOR/ZRANB1/USP9X/PDE8A/PSPC1/ACTR2/RPTOR/MATR3/CSNK1G1/CD226/FAF1
GO:0010033	GO:0010033	response to organic substance	185	0.296553	1.59325	0.00262313	0.00891281	0.00333085	574	tags=29%, list=21%, signal=24%	PARP8/NR3C1/FOS/FOSB/DUSP1/EXT1/PRKCA/GNAQ/AHR/PELI1/TNFSF4/NR4A2/RAP1B/ZFP36/NFKB1/TNFAIP3/ATP2B1/HSPA5/ACTN4/FOXO1/JUN/CD74/BCLAF1/PTPN1/OSBPL8/TFRC/HNRNPU/OXSR1/PAK2/ITPR1/CAPN2/IRF1/HSP90B1/ROCK1/TESC/STXBP4/FOXO3/GSK3B/LRCH1/ERN1/GRB2/SMYD3/MEF2A/TGFBR2/ZFP36L2/UBR1/ACTR2/RAP1GDS1/RPTOR/VIM/SYAP1/ATP2B4/FAF1
GO:0010605	GO:0010605	negative regulation of macromolecule metabolic process	225	0.286854	1.58025	0.00270051	0.00891281	0.00333085	743	tags=37%, list=27%, signal=29%	DUSP1/YWHAZ/CD44/SRGN/LMNA/GNAQ/TOB1/SH3RF2/RBPJ/FBXW7/MGAT5/TNFSF4/NR4A2/ZFP36/ID2/ZBTB38/NFKB1/TNFAIP3/NFATC3/PPP1R15A/ATP2B1/JUN/BCLAF1/PTPN1/CD28/SMARCA2/BTG2/APBB2/ZHX2/ZEB1/HNRNPU/EED/PAK2/TSPYL2/IRF1/YTHDC1/ROCK1/DLG1/SMG6/IVNS1ABP/SLA2/GSK3B/NOTCH2/PHF21A/SMYD3/CBLB/PDS5A/L3MBTL3/MEF2A/RBL2/SMAD3/SND1/ZNF827/USP9X/PIAS1/IFI6/ZFP36L1/FNIP1/PSPC1/ZFP36L2/ETF1/VIM/ATP2B4/AZIN1/CLTC/FHIT/CDC7…
GO:0051173	GO:0051173	positive regulation of nitrogen compound metabolic process	249	0.27947	1.56444	0.00258796	0.00891281	0.00333085	582	tags=29%, list=21%, signal=25%	NR3C1/FOS/CD44/TOB1/SH3RF2/AHR/RBPJ/FBXW7/PPP1R12A/PELI1/ZFP36/NFKB1/RUNX1/TNFAIP3/NCOA2/FAS/PPP1R15A/HSPA5/HUWE1/FOXO1/JUN/CD74/PMAIP1/BCLAF1/PTPN1/CD28/OSBPL8/SMARCA2/TFRC/BTG2/RNF19A/APBB2/ARRDC3/HNRNPU/PAK2/MYH9/ROCK1/TESC/DLG1/NAMPT/FOXO3/GSK3B/MSL2/NOTCH2/ERN1/SMYD3/CBLB/TRA2A/L3MBTL3/MEF2A/ABI1/SMAD3/RICTOR/CCNK/USP9X/TGFBR2/PIAS1/ZFP36L1/KDM5A/FNIP1/RUNX3/ANKIB1/PPP1R10/ZFP36L2/RAF1/ACTR2…
GO:0009893	GO:0009893	positive regulation of metabolic process	297	0.268063	1.53635	0.00250635	0.00891281	0.00333085	582	tags=28%, list=21%, signal=25%	NR3C1/FOS/PDE4D/CD44/LMNA/TOB1/SH3RF2/AHR/RBPJ/FBXW7/PPP1R12A/PELI1/TNFSF4/NFATC2/ZFP36/NFKB1/RUNX1/TNFAIP3/NCOA2/FAS/PPP1R15A/HSPA5/HUWE1/FOXO1/JUN/CD74/PMAIP1/BCLAF1/PTPN1/CD2/CD28/OSBPL8/SMARCA2/ELOVL5/TFRC/BTG2/RNF19A/APBB2/ARRDC3/HNRNPU/PAK2/MYH9/IRF1/CARD11/ROCK1/TESC/DLG1/NAMPT/FOXO3/GSK3B/MSL2/NOTCH2/ERN1/GRB2/SMYD3/CBLB/TRA2A/L3MBTL3/MEF2A/ABI1/SMAD3/RICTOR/CCNK/USP9X/TGFBR2/PIAS1/ZFP36L…
GO:0006366	GO:0006366	transcription by RNA polymerase II	214	0.271823	1.48422	0.0027424	0.00891281	0.00333085	620	tags=28%, list=23%, signal=24%	NR3C1/FOS/FOSB/YWHAZ/AHR/RBPJ/ETV6/PPP1R12A/NR4A2/NFATC2/ZFP36/ID2/NFKB1/RUNX1/NCOA2/NFATC3/CCNL1/IKZF3/FOXO1/JUN/BCLAF1/CD28/KLF6/SMARCA2/APBB2/ZHX2/ZEB1/HNRNPU/EED/POLR2A/NR3C2/IRF1/ZNF644/DLG1/CCNH/SLA2/SUPT3H/NAMPT/FOXO3/NOTCH2/RFX7/PHF21A/ZZZ3/SMYD3/MEF2A/RBL2/SMAD3/CCNK/PIAS1/FNIP1/PBX3/FLI1/ACTR2/ATP2B4/CDK12/ELF1/RAD21/CDC73/ZMYND8/ELK3
GO:0042127	GO:0042127	regulation of cell population proliferation	128	0.322299	1.63872	0.00299027	0.00953501	0.00356338	485	tags=29%, list=18%, signal=25%	SKAP2/PRKCA/CD44/LMNA/TOB1/AHR/RBPJ/PELI1/LGALS3/NFATC2/ZFP36/TNFAIP3/CHST11/IKZF3/JUN/CD74/CD28/SMARCA2/TFRC/BTG2/PTPN9/HNRNPU/PAK2/IRF1/CARD11/TESC/STXBP4/DLG1/FOXO3/GSK3B/NOTCH2/ERN1/CBLB/SMAD3/TGFBR2/PIAS1/CDK6
GO:0009967	GO:0009967	positive regulation of signal transduction	112	0.338291	1.68244	0.00318493	0.00981581	0.00366832	328	tags=25%, list=12%, signal=23%	S100A4/MAPRE2/PRKCA/CD44/SH3RF2/RBPJ/FBXW7/PELI1/MGAT5/RAP1B/NFKB1/TNFAIP3/ACTN4/JUN/CD74/BCLAF1/PTPN1/CD28/TSPAN5/OSBPL8/TFRC/CHSY1/ARRDC3/PAK2/NR3C2/CARD11/ROCK1/PJA2
GO:0016310	GO:0016310	phosphorylation	197	0.291095	1.57892	0.00319449	0.00981581	0.00366832	914	tags=47%, list=33%, signal=34%	DUSP1/SKAP2/PRKCA/CD44/GNAQ/SIK3/FBXW7/SH3KBP1/NEK7/TNFAIP3/RPS6KA3/JUN/CD74/PTPN1/OSBPL8/TFRC/PRKCH/STK17B/CASK/SNRK/CDK17/DYRK1A/HNRNPU/OXSR1/PAK2/PIK3R1/TSPYL2/SKAP1/ROCK1/BAZ1B/DLG1/MAP3K2/TNIK/VRK1/SRPK2/GSK3B/NOTCH2/TOP1/ERN1/SMYD3/CBLB/RBL2/ABI1/RICTOR/MOB3A/TGFBR2/CDK6/FNIP1/LATS1/PRPF4B/RAF1/CSNK1G3/RPTOR/CSNK1G1/CCNY/SYAP1/ATP2B4/PKN2/CDK12/TGFBR1/ZMYND8/DNAJC3/STK26/AKT3/TAOK3/MTOR/SIK…
GO:0031324	GO:0031324	negative regulation of cellular metabolic process	212	0.285453	1.56109	0.00334095	0.0100825	0.00376799	743	tags=37%, list=27%, signal=29%	DUSP1/YWHAZ/SRGN/LMNA/GNAQ/TOB1/RBPJ/FBXW7/MGAT5/TNFSF4/NR4A2/ZFP36/ID2/ZBTB38/NFKB1/TNFAIP3/NFATC3/PPP1R15A/ATP2B1/JUN/BCLAF1/PTPN1/CD28/SMARCA2/BTG2/USP36/APBB2/ZHX2/ZEB1/HNRNPU/EED/TSPYL2/IRF1/YTHDC1/ROCK1/DLG1/SMG6/SLA2/GSK3B/NOTCH2/PHF21A/SMYD3/CBLB/PDS5A/MTM1/L3MBTL3/MEF2A/RBL2/SMAD3/SND1/ZNF827/PIAS1/ZFP36L1/FNIP1/PSPC1/ZFP36L2/ETF1/VIM/ATP2B4/CLTC/CDC73/ZMYND8/PNRC2/DNAJC3/AKT3/SMCHD1/UBA…
GO:0044085	GO:0044085	cellular component biogenesis	262	-0.236834	-1.48962	0.00362083	0.0107354	0.004012	505	tags=26%, list=18%, signal=23%	RBIS/ARPC3/PSMG2/STOML2/SNRPG/UGCG/PTGER4/MTSS1/TAF10/NDUFA1/CLTA/CEP63/ISCA1/NSA2/VPS28/LSM6/STK4/CIAO2A/GABARAPL2/LOC717879/NDUFS8/IMP3/NDUFB8/ATP5F1D/NOP53/CCT3/PFDN5/SUB1/PET100/TRMT112/C1QBP/SNRPB/EIF3K/RPL10/RPL23A/RPS5/S1PR1/EIF3F/RSL24D1/RPS7/RPL7A/RPS8/RPS9/ATF7IP2/EIF3E/CHMP7/SAMHD1/RPS16/RPS4X/RPL6/RPL27/HSPA8/RPS15/RPL38/RPS13/LIMD2/RPL5/RPL14/RPL26/RPSA/RPL7/RPLP0/RPS28/RPS21/RPL35A/…
GO:0010556	GO:0010556	regulation of macromolecule biosynthetic process	431	0.240347	1.43268	0.00411243	0.0119828	0.00447815	620	tags=27%, list=23%, signal=25%	NR3C1/FOS/FOSB/YWHAZ/PDE4D/SRGN/LMNA/TOB1/DNAJC1/AHR/RBPJ/FBXW7/ETV6/PPP1R12A/FUT8/PELI1/TNFSF4/NR4A2/NFATC2/ZFP36/ID2/ZBTB38/NFKB1/RUNX1/TNFAIP3/NCOA2/NFATC3/PPP1R15A/CCNL1/ATP2B1/IKZF3/HUWE1/FOXO1/JUN/CD74/PTBP3/BCLAF1/FUBP1/CD2/CD28/KLF6/FOXN2/SMARCA2/TFRC/BTG2/BHLHE40/USP36/APBB2/JMY/ZHX2/CDK17/ZEB1/HNRNPU/EED/NR3C2/MYH9/IRF1/ZNF644/YTHDC1/CARD11/ROCK1/TESC/DLG1/SMG6/CCNH/SLA2/NAMPT/FOXO3/GSK…
GO:0010647	GO:0010647	positive regulation of cell communication	120	0.325687	1.64628	0.00485843	0.012688	0.00474168	328	tags=24%, list=12%, signal=22%	S100A4/MAPRE2/PRKCA/CD44/SH3RF2/RBPJ/FBXW7/PELI1/MGAT5/RAP1B/NFKB1/TNFAIP3/ACTN4/JUN/CD74/BCLAF1/PTPN1/CD28/TSPAN5/OSBPL8/TFRC/CHSY1/ARRDC3/PAK2/ITPR1/NR3C2/CARD11/ROCK1/PJA2
GO:0023056	GO:0023056	positive regulation of signaling	120	0.325687	1.64628	0.00485843	0.012688	0.00474168	328	tags=24%, list=12%, signal=22%	S100A4/MAPRE2/PRKCA/CD44/SH3RF2/RBPJ/FBXW7/PELI1/MGAT5/RAP1B/NFKB1/TNFAIP3/ACTN4/JUN/CD74/BCLAF1/PTPN1/CD28/TSPAN5/OSBPL8/TFRC/CHSY1/ARRDC3/PAK2/ITPR1/NR3C2/CARD11/ROCK1/PJA2
GO:0065008	GO:0065008	regulation of biological quality	146	0.305665	1.58268	0.00482001	0.012688	0.00474168	573	tags=30%, list=21%, signal=25%	NR3C1/EXT1/PRKCA/SRGN/LMNA/GNAQ/TOB1/FBXW7/SH3KBP1/SLC9A9/MCTP2/RAP1B/ZFP36/NFKB1/PPP1R15A/ATP2B1/CPQ/BTG2/CASK/USP36/HNRNPU/ITPR1/MYH9/YTHDC1/ROCK1/TESC/STXBP4/DLG1/ARFGEF1/ATP1B3/GRB2/YWHAG/FCHSD2/SMAD3/RICTOR/USP9X/IFI6/ZFP36L1/ZFP36L2/ARHGAP15/RPTOR/VIM/SYAP1/ATP2B4
GO:0051172	GO:0051172	negative regulation of nitrogen compound metabolic process	179	0.290644	1.5508	0.00487998	0.012688	0.00474168	519	tags=28%, list=19%, signal=24%	DUSP1/YWHAZ/CD44/GNAQ/TOB1/SH3RF2/RBPJ/MGAT5/NR4A2/ZFP36/ID2/ZBTB38/NFKB1/TNFAIP3/NFATC3/PPP1R15A/JUN/BCLAF1/PTPN1/SMARCA2/BTG2/APBB2/ZHX2/ZEB1/HNRNPU/EED/PAK2/TSPYL2/IRF1/ROCK1/DLG1/SMG6/IVNS1ABP/SLA2/NOTCH2/PHF21A/SMYD3/CBLB/PDS5A/L3MBTL3/MEF2A/SMAD3/ZNF827/USP9X/PIAS1/IFI6/ZFP36L1/FNIP1/PSPC1/ZFP36L2
GO:0051252	GO:0051252	regulation of RNA metabolic process	327	0.250738	1.45033	0.004714	0.012688	0.00474168	586	tags=27%, list=21%, signal=24%	NR3C1/FOS/FOSB/YWHAZ/TOB1/AHR/RBPJ/ETV6/PPP1R12A/PELI1/NR4A2/NFATC2/ZFP36/ID2/ZBTB38/NFKB1/RUNX1/TNFAIP3/NCOA2/NFATC3/CCNL1/IKZF3/FOXO1/JUN/CD74/PTBP3/BCLAF1/FUBP1/CD28/KLF6/FOXN2/SMARCA2/TFRC/BTG2/BHLHE40/USP36/APBB2/JMY/ZHX2/CDK17/ZEB1/HNRNPU/EED/NR3C2/IRF1/ZNF644/YTHDC1/CARD11/ROCK1/TESC/DLG1/CCNH/SLA2/NAMPT/FOXO3/MSL2/NOTCH2/RFX7/PHF21A/ERN1/ZZZ3/MBNL3/SMYD3/TRA2A/L3MBTL3/MEF2A/RBL2/SMAD3/ZNF…
GO:0048518	GO:0048518	positive regulation of biological process	456	0.238274	1.42311	0.00450112	0.012688	0.00474168	616	tags=27%, list=22%, signal=25%	S100A4/NR3C1/FOS/MAPRE2/PRKCA/PDE4D/CD44/LMNA/TOB1/SH3RF2/AHR/RBPJ/FBXW7/PPP1R12A/PELI1/MGAT5/SH3KBP1/TNFSF4/RAP1B/LGALS3/NFATC2/ZFP36/NFKB1/RUNX1/TNFAIP3/NCOA2/FAS/PPP1R15A/ATP2B1/HSPA5/ACTN4/HUWE1/FOXO1/JUN/CD74/PMAIP1/BCLAF1/PTPN1/CD2/CD28/TSPAN5/OSBPL8/SMARCA2/ELOVL5/TFRC/LPXN/BTG2/PTPN9/STK17B/CHSY1/RNF19A/APBB2/JMY/ARRDC3/HNRNPU/OXSR1/PAK2/ITPR1/NR3C2/MYH9/IRF1/CARD11/ROCK1/PJA2/TESC/STXBP4…
GO:0009889	GO:0009889	regulation of biosynthetic process	436	0.238212	1.42015	0.00465836	0.012688	0.00474168	620	tags=27%, list=23%, signal=25%	NR3C1/FOS/FOSB/YWHAZ/PDE4D/SRGN/LMNA/TOB1/DNAJC1/AHR/RBPJ/FBXW7/ETV6/PPP1R12A/FUT8/PELI1/TNFSF4/NR4A2/NFATC2/ZFP36/ID2/ZBTB38/NFKB1/RUNX1/TNFAIP3/NCOA2/NFATC3/PPP1R15A/CCNL1/ATP2B1/IKZF3/HUWE1/FOXO1/JUN/CD74/PTBP3/BCLAF1/FUBP1/CD2/CD28/KLF6/FOXN2/SMARCA2/ELOVL5/TFRC/BTG2/BHLHE40/USP36/APBB2/JMY/ZHX2/CDK17/ZEB1/HNRNPU/EED/NR3C2/MYH9/IRF1/ZNF644/YTHDC1/CARD11/ROCK1/TESC/DLG1/SMG6/CCNH/SLA2/NAMPT/FO…
GO:0006357	GO:0006357	regulation of transcription by RNA polymerase II	201	0.280991	1.5267	0.00523492	0.0132045	0.00493472	620	tags=29%, list=23%, signal=24%	NR3C1/FOS/FOSB/YWHAZ/AHR/RBPJ/ETV6/PPP1R12A/NR4A2/NFATC2/ZFP36/ID2/NFKB1/RUNX1/NCOA2/NFATC3/CCNL1/IKZF3/FOXO1/JUN/BCLAF1/CD28/KLF6/SMARCA2/APBB2/ZHX2/ZEB1/HNRNPU/EED/NR3C2/IRF1/ZNF644/DLG1/CCNH/SLA2/NAMPT/FOXO3/NOTCH2/RFX7/PHF21A/ZZZ3/SMYD3/MEF2A/RBL2/SMAD3/CCNK/PIAS1/FNIP1/PBX3/FLI1/ACTR2/ATP2B4/CDK12/ELF1/RAD21/CDC73/ZMYND8/ELK3
GO:0033554	GO:0033554	cellular response to stress	191	0.281499	1.51881	0.00522694	0.0132045	0.00493472	742	tags=36%, list=27%, signal=28%	PARP8/FOS/DUSP1/CD44/LMNA/SH3RF2/RBPJ/FUT8/NR4A2/IMMP2L/NFATC2/ZFP36/ZBTB38/NFKB1/TNFAIP3/FAS/PPP1R15A/HSPA5/HUWE1/FOXO1/JUN/CD74/PMAIP1/PSME4/BCLAF1/PTPN1/BTG2/PNPLA8/JMY/OXSR1/ITPR1/HSP90B1/XPR1/PJA2/STXBP4/DLG1/FOXO3/GSK3B/ERN1/GRB2/SUSD6/SMAD3/CCNK/BCL2A1/FNIP1/PPP1R10/ACTR2/ASCC3/RPTOR/FAF1/RAD21/ZMYND8/DNAJC3/AKT3/SMCHD1/BABAM2/MTOR/EDEM3/DNAJA1/PPM1D/UVRAG/SMG1/USP47/CANX/PARG/CUL3/KAT7/SI…
GO:0031325	GO:0031325	positive regulation of cellular metabolic process	257	0.263502	1.47924	0.00559788	0.0139124	0.00519927	582	tags=28%, list=21%, signal=24%	NR3C1/FOS/PDE4D/CD44/LMNA/TOB1/AHR/RBPJ/FBXW7/PPP1R12A/PELI1/TNFSF4/NFATC2/ZFP36/NFKB1/RUNX1/NCOA2/PPP1R15A/FOXO1/JUN/CD74/BCLAF1/PTPN1/CD2/CD28/OSBPL8/SMARCA2/ELOVL5/TFRC/BTG2/APBB2/HNRNPU/PAK2/MYH9/IRF1/CARD11/ROCK1/TESC/DLG1/NAMPT/FOXO3/GSK3B/MSL2/NOTCH2/ERN1/GRB2/SMYD3/TRA2A/MEF2A/ABI1/SMAD3/RICTOR/CCNK/USP9X/TGFBR2/ZFP36L1/KDM5A/FNIP1/RUNX3/PPP1R10/ZFP36L2/RAF1/ACTR2/RPTOR/VIM/SYAP1/CD226/AT…
GO:0042221	GO:0042221	response to chemical	232	0.271968	1.50836	0.00603402	0.0146573	0.00547766	420	tags=22%, list=15%, signal=20%	PARP8/NR3C1/FOS/FOSB/DUSP1/EXT1/PRKCA/LMNA/GNAQ/AHR/RBPJ/PPP1R12A/FUT8/PELI1/TNFSF4/NR4A2/RAP1B/LGALS3/NFATC2/ZFP36/NFKB1/TNFAIP3/CYSLTR1/ATP2B1/HSPA5/ACTN4/FOXO1/JUN/CD74/BCLAF1/PTPN1/OSBPL8/TFRC/PNPLA8/HNRNPU/OXSR1/PAK2/ITPR1/CAPN2/IRF1/HSP90B1/ROCK1/TESC/STXBP4/FOXO3/GSK3B/TOP1/LRCH1/ERN1/GRB2/SMYD3
GO:0002376	GO:0002376	immune system process	191	0.279496	1.508	0.00607107	0.0146573	0.00547766	423	tags=25%, list=15%, signal=23%	FOS/DUSP1/LOC714964/CST7/MAMU-A/EXT1/PDE4D/CD44/SLAMF1/AHR/RBPJ/FBXW7/PELI1/SH3KBP1/TNFSF4/LGALS3/NFATC2/ZFP36/NFKB1/RUNX1/TNFAIP3/FAS/CYSLTR1/IKZF3/JUN/CD74/CD2/CD28/TFRC/LPXN/HCST/OXSR1/SH2D1A/MYH9/IRF1/CARD11/ROCK1/PJA2/TESC/STXBP4/DLG1/SLA2/PTPN22/FYB1/NOTCH2/LRCH1/GRB2/CBLB
GO:0006793	GO:0006793	phosphorus metabolic process	283	0.253346	1.44497	0.00659124	0.015689	0.00586322	801	tags=39%, list=29%, signal=31%	DUSP1/SKAP2/PRKCA/PDE4D/CD44/GNAQ/SIK3/FBXW7/PPP1R12A/FUT8/MGAT5/SH3KBP1/NEK7/TNFAIP3/PPP1R15A/RPS6KA3/JUN/CD74/PTPN1/ACSL4/SGMS1/OSBPL8/ELOVL5/TFRC/PRKCH/PTPN9/PNPLA8/STK17B/CASK/SNRK/UXS1/CDK17/DYRK1A/HNRNPU/OXSR1/PAK2/PIK3R1/TSPYL2/ETNK1/HSP90B1/SKAP1/ROCK1/BAZ1B/DLG1/MAP3K2/TNIK/SLA2/PTPN22/VRK1/SRPK2/NAMPT/PTP4A1/GSK3B/NOTCH2/TOP1/ERN1/OGDH/SMYD3/CBLB/MTM1/RBL2/ABI1/RICTOR/MOB3A/TGFBR2/CDK6/…
GO:0009966	GO:0009966	regulation of signal transduction	249	0.266502	1.49185	0.00701943	0.0164762	0.0061574	574	tags=29%, list=21%, signal=25%	S100A4/PDE3B/DUSP1/MAPRE2/PRKCA/PDE4D/CD44/LMNA/GNAQ/TOB1/SH3RF2/RBPJ/FBXW7/PELI1/MGAT5/NR4A2/RAP1B/LGALS3/NFKB1/TNFAIP3/FAS/CHST11/HSPA5/ACTN4/FOXO1/JUN/CD74/BCLAF1/PTPN1/CD28/TSPAN5/OSBPL8/TFRC/LPXN/CHSY1/HERC4/ARRDC3/PAK2/ITPR1/NR3C2/IRF1/CARD11/ROCK1/PJA2/DLG1/ARFGEF1/IVNS1ABP/SLA2/PTPN22/FOXO3/GSK3B/NOTCH2/ERN1/GRB2/RASA2/CBLB/SMAD3/RICTOR/CCNK/ZRANB1/USP9X/IFI6/PDE8A/FNIP1/PPP1R10/UBR1/RAP1…
GO:0002682	GO:0002682	regulation of immune system process	117	0.318885	1.60173	0.00727447	0.0168409	0.0062937	744	tags=41%, list=27%, signal=31%	FOS/DUSP1/PDE4D/AHR/FBXW7/PELI1/SH3KBP1/LGALS3/NFATC2/ZFP36/NFKB1/RUNX1/TNFAIP3/IKZF3/CD74/CD28/TFRC/LPXN/HCST/OXSR1/IRF1/CARD11/PJA2/TESC/DLG1/SLA2/PTPN22/FYB1/NOTCH2/LRCH1/GRB2/CBLB/SMAD3/TGFBR2/PSPC1/ZFP36L2/MATR3/CD226/CDC73/DPP4/HSPA9/AP1G1/RFTN1/UBASH3B/KAT7/STX7/SIRT1/GLMN
GO:0031326	GO:0031326	regulation of cellular biosynthetic process	435	0.2391	1.42489	0.00751833	0.0171702	0.00641678	620	tags=27%, list=23%, signal=25%	NR3C1/FOS/FOSB/YWHAZ/PDE4D/SRGN/LMNA/TOB1/DNAJC1/AHR/RBPJ/FBXW7/ETV6/PPP1R12A/FUT8/PELI1/TNFSF4/NR4A2/NFATC2/ZFP36/ID2/ZBTB38/NFKB1/RUNX1/TNFAIP3/NCOA2/NFATC3/PPP1R15A/CCNL1/ATP2B1/IKZF3/HUWE1/FOXO1/JUN/CD74/PTBP3/BCLAF1/FUBP1/CD2/CD28/KLF6/FOXN2/SMARCA2/ELOVL5/TFRC/BTG2/BHLHE40/USP36/APBB2/JMY/ZHX2/CDK17/ZEB1/HNRNPU/EED/NR3C2/MYH9/IRF1/ZNF644/YTHDC1/CARD11/ROCK1/TESC/DLG1/SMG6/CCNH/SLA2/NAMPT/FO…
GO:0048583	GO:0048583	regulation of response to stimulus	313	0.249845	1.43906	0.00793012	0.0178692	0.006678	762	tags=36%, list=28%, signal=29%	S100A4/PDE3B/DUSP1/MAPRE2/PRKCA/PDE4D/CD44/LMNA/GNAQ/TOB1/SH3RF2/AHR/RBPJ/FBXW7/FUT8/PELI1/MGAT5/TNFSF4/NR4A2/RAP1B/LGALS3/NFATC2/ZFP36/NFKB1/TNFAIP3/FAS/CHST11/ATP2B1/HSPA5/ACTN4/FOXO1/JUN/CD74/BCLAF1/PTPN1/CD28/TSPAN5/OSBPL8/TFRC/LPXN/PNPLA8/HCST/CHSY1/HERC4/ARRDC3/OXSR1/PAK2/ITPR1/NR3C2/IRF1/CARD11/ROCK1/PJA2/DLG1/ARFGEF1/IVNS1ABP/SLA2/PTPN22/FOXO3/GSK3B/FYB1/NOTCH2/ERN1/GRB2/RASA2/CBLB/MEF2A/…
GO:0009890	GO:0009890	negative regulation of biosynthetic process	176	0.271651	1.44513	0.00883594	0.0193932	0.00724753	743	tags=36%, list=27%, signal=28%	YWHAZ/SRGN/LMNA/TOB1/RBPJ/FBXW7/TNFSF4/NR4A2/ZFP36/ID2/ZBTB38/NFKB1/TNFAIP3/NFATC3/ATP2B1/JUN/BCLAF1/CD28/SMARCA2/BTG2/APBB2/ZHX2/ZEB1/HNRNPU/EED/IRF1/YTHDC1/ROCK1/DLG1/SMG6/SLA2/GSK3B/NOTCH2/PHF21A/L3MBTL3/MEF2A/RBL2/SMAD3/SND1/ZNF827/PIAS1/ZFP36L1/FNIP1/PSPC1/ZFP36L2/ETF1/VIM/ATP2B4/CLTC/CDC73/ZMYND8/PNRC2/SMCHD1/CNOT6L/NFX1/NR1D2/CNOT9/PPM1D/SMG1/USP47/CUL3/SIRT1/SNIP1
GO:0031327	GO:0031327	negative regulation of cellular biosynthetic process	176	0.271651	1.44513	0.00883594	0.0193932	0.00724753	743	tags=36%, list=27%, signal=28%	YWHAZ/SRGN/LMNA/TOB1/RBPJ/FBXW7/TNFSF4/NR4A2/ZFP36/ID2/ZBTB38/NFKB1/TNFAIP3/NFATC3/ATP2B1/JUN/BCLAF1/CD28/SMARCA2/BTG2/APBB2/ZHX2/ZEB1/HNRNPU/EED/IRF1/YTHDC1/ROCK1/DLG1/SMG6/SLA2/GSK3B/NOTCH2/PHF21A/L3MBTL3/MEF2A/RBL2/SMAD3/SND1/ZNF827/PIAS1/ZFP36L1/FNIP1/PSPC1/ZFP36L2/ETF1/VIM/ATP2B4/CLTC/CDC73/ZMYND8/PNRC2/SMCHD1/CNOT6L/NFX1/NR1D2/CNOT9/PPM1D/SMG1/USP47/CUL3/SIRT1/SNIP1
GO:0006396	GO:0006396	RNA processing	125	-0.281545	-1.5635	0.00964457	0.0203742	0.00761413	347	tags=18%, list=13%, signal=17%	PUF60/EXOSC6/IMP3/AKAP17A/TRMT112/C1QBP/SNRPB/RPS7/RPS8/RPS16/RPL27/HSPA8/RPS15/RPS13/RPL5/HNRNPA1/RPL7/RPS28/RPS21/RPL35A/RPS25/RPS27/RPL35
GO:0008219	GO:0008219	cell death	174	0.280096	1.48349	0.00958565	0.0203742	0.00761413	526	tags=28%, list=19%, signal=24%	NR3C1/YWHAZ/PRKCA/CD44/SRGN/LMNA/SH3RF2/FBXW7/PELI1/NR4A2/LGALS3/ZFP36/TNFAIP3/FAS/CHST11/HSPA5/IKZF3/FOXO1/JUN/CD74/ELMO1/PMAIP1/BCLAF1/PTPN1/CD28/TFRC/STK17B/USP36/JMY/PAK2/ITPR1/IRF1/HSP90B1/CARD11/ROCK1/IVNS1ABP/FOXO3/GSK3B/NOTCH2/ERN1/FBXO11/SMAD3/TGFBR2/IFI6/BCL2A1/FNIP1/B4GALT1/PPP1R10/RAF1
GO:0012501	GO:0012501	programmed cell death	174	0.280096	1.48349	0.00958565	0.0203742	0.00761413	526	tags=28%, list=19%, signal=24%	NR3C1/YWHAZ/PRKCA/CD44/SRGN/LMNA/SH3RF2/FBXW7/PELI1/NR4A2/LGALS3/ZFP36/TNFAIP3/FAS/CHST11/HSPA5/IKZF3/FOXO1/JUN/CD74/ELMO1/PMAIP1/BCLAF1/PTPN1/CD28/TFRC/STK17B/USP36/JMY/PAK2/ITPR1/IRF1/HSP90B1/CARD11/ROCK1/IVNS1ABP/FOXO3/GSK3B/NOTCH2/ERN1/FBXO11/SMAD3/TGFBR2/IFI6/BCL2A1/FNIP1/B4GALT1/PPP1R10/RAF1
GO:0043067	GO:0043067	regulation of programmed cell death	135	0.298989	1.53319	0.0113474	0.0236753	0.00884784	387	tags=24%, list=14%, signal=21%	NR3C1/YWHAZ/PRKCA/CD44/LMNA/SH3RF2/FBXW7/PELI1/NR4A2/LGALS3/ZFP36/TNFAIP3/FAS/CHST11/HSPA5/IKZF3/FOXO1/JUN/CD74/BCLAF1/PTPN1/TFRC/STK17B/USP36/JMY/PAK2/HSP90B1/CARD11/ROCK1/IVNS1ABP/GSK3B/NOTCH2
GO:0007010	GO:0007010	cytoskeleton organization	110	0.311705	1.54936	0.0122013	0.0251466	0.00939767	616	tags=35%, list=22%, signal=28%	MAPRE2/LMNA/LCP1/PPP1R12A/SH3KBP1/MYO1D/TNFAIP3/SRGAP2/MYO5A/ACTN4/ELMO1/SNRK/JMY/HNRNPU/MAP4/PAK2/MYH9/HSP90B1/XPO1/ROCK1/DLG1/ARFGEF1/GSK3B/TPM4/GRB2/MTM1/MEF2A/FCHSD2/RICTOR/ZRANB1/HOOK3/STAG1/ACTR2/VIM/CLTC/CLASP1/ARHGAP25/MTPN
GO:0010558	GO:0010558	negative regulation of macromolecule biosynthetic process	175	0.27408	1.45398	0.0123955	0.025239	0.00943222	743	tags=36%, list=27%, signal=28%	YWHAZ/SRGN/LMNA/TOB1/RBPJ/FBXW7/TNFSF4/NR4A2/ZFP36/ID2/ZBTB38/NFKB1/TNFAIP3/NFATC3/ATP2B1/JUN/BCLAF1/CD28/SMARCA2/BTG2/APBB2/ZHX2/ZEB1/HNRNPU/EED/IRF1/YTHDC1/ROCK1/DLG1/SMG6/SLA2/GSK3B/NOTCH2/PHF21A/L3MBTL3/MEF2A/RBL2/SMAD3/SND1/ZNF827/PIAS1/ZFP36L1/FNIP1/PSPC1/ZFP36L2/ETF1/VIM/ATP2B4/CLTC/CDC73/ZMYND8/PNRC2/SMCHD1/CNOT6L/NFX1/NR1D2/CNOT9/PPM1D/SMG1/USP47/CUL3/SIRT1/SNIP1
GO:0019219	GO:0019219	regulation of nucleobase-containing compound metabolic process	354	0.239299	1.40108	0.0131386	0.0264337	0.00987867	743	tags=33%, list=27%, signal=27%	NR3C1/FOS/FOSB/YWHAZ/TOB1/AHR/RBPJ/ETV6/PPP1R12A/PELI1/NR4A2/NFATC2/ZFP36/ID2/ZBTB38/NFKB1/RUNX1/TNFAIP3/NCOA2/NFATC3/CCNL1/IKZF3/FOXO1/JUN/CD74/PTBP3/BCLAF1/FUBP1/CD28/KLF6/FOXN2/SMARCA2/TFRC/BTG2/BHLHE40/USP36/APBB2/JMY/ZHX2/CDK17/ZEB1/HNRNPU/EED/TSPYL2/NR3C2/IRF1/ZNF644/YTHDC1/CARD11/ROCK1/TESC/DLG1/SMG6/CCNH/SLA2/NAMPT/FOXO3/MSL2/NOTCH2/RFX7/PHF21A/ERN1/ZZZ3/MBNL3/SMYD3/PDS5A/TRA2A/L3MBTL3/ME…
GO:0032879	GO:0032879	regulation of localization	117	0.304809	1.53102	0.0137141	0.0269498	0.0100715	371	tags=23%, list=14%, signal=21%	LMNA/DNAJC1/FBXW7/PPP1R12A/MCTP2/RAP1B/LGALS3/ZFP36/ATP2B1/CLIC5/BTBD9/CD74/PTPN1/OSBPL8/TFRC/PTPN9/CASK/HNRNPU/OXSR1/ITPR1/XPO1/ROCK1/TESC/STXBP4/DLG1/ATP1B3/GSK3B
GO:1902531	GO:1902531	regulation of intracellular signal transduction	158	0.281676	1.4706	0.0137104	0.0269498	0.0100715	414	tags=24%, list=15%, signal=22%	S100A4/PDE3B/DUSP1/MAPRE2/PDE4D/CD44/TOB1/SH3RF2/FBXW7/PELI1/RAP1B/TNFAIP3/FAS/ACTN4/FOXO1/JUN/CD74/BCLAF1/PTPN1/CD28/OSBPL8/TFRC/ARRDC3/PAK2/ITPR1/NR3C2/CARD11/ROCK1/PJA2/DLG1/ARFGEF1/IVNS1ABP/SLA2/GSK3B/NOTCH2/ERN1/GRB2/RASA2
GO:0048522	GO:0048522	positive regulation of cellular process	414	0.230826	1.37302	0.014717	0.0285882	0.0106839	1188	tags=54%, list=43%, signal=36%	S100A4/NR3C1/FOS/MAPRE2/PRKCA/PDE4D/CD44/LMNA/TOB1/SH3RF2/AHR/RBPJ/FBXW7/PPP1R12A/PELI1/MGAT5/SH3KBP1/TNFSF4/RAP1B/LGALS3/NFATC2/ZFP36/NFKB1/RUNX1/TNFAIP3/NCOA2/PPP1R15A/HSPA5/ACTN4/FOXO1/JUN/CD74/BCLAF1/PTPN1/CD2/CD28/TSPAN5/OSBPL8/SMARCA2/ELOVL5/TFRC/BTG2/PTPN9/STK17B/CHSY1/APBB2/JMY/ARRDC3/HNRNPU/OXSR1/PAK2/ITPR1/NR3C2/MYH9/IRF1/CARD11/ROCK1/PJA2/TESC/STXBP4/DLG1/ATP1B3/SMC4/NAMPT/FOXO3/GSK3B/…
GO:2001141	GO:2001141	regulation of RNA biosynthetic process	288	0.244457	1.39548	0.0155552	0.0298731	0.011164	513	tags=24%, list=19%, signal=21%	NR3C1/FOS/FOSB/YWHAZ/AHR/RBPJ/ETV6/PPP1R12A/PELI1/NR4A2/NFATC2/ZFP36/ID2/ZBTB38/NFKB1/RUNX1/TNFAIP3/NCOA2/NFATC3/CCNL1/IKZF3/FOXO1/JUN/CD74/BCLAF1/FUBP1/CD28/KLF6/FOXN2/SMARCA2/TFRC/BHLHE40/APBB2/JMY/ZHX2/CDK17/ZEB1/HNRNPU/EED/NR3C2/IRF1/ZNF644/CARD11/TESC/DLG1/CCNH/SLA2/NAMPT/FOXO3/MSL2/NOTCH2/RFX7/PHF21A/ZZZ3/SMYD3/L3MBTL3/MEF2A/RBL2/SMAD3/ZNF827/CCNK/PIAS1/PDE8A/KDM5A/FNIP1/RUNX3/PSPC1/PBX3
GO:0022402	GO:0022402	cell cycle process	106	0.307784	1.52193	0.0172186	0.0320018	0.0119596	998	tags=52%, list=36%, signal=34%	MAPRE2/LMNA/FBXW7/PPP1R12A/ID2/CD28/APBB2/CDK17/HNRNPU/MYH9/XPO1/ROCK1/STXBP4/DLG1/SMC4/TOP1/PDS5A/RBL2/SND1/STAG1/PPP1R10/ZFP36L2/ACTR2/RPTOR/ATP2B4/ESCO1/RAD21/CLTC/CDC73/CLASP1/AVEN/AHCTF1/BABAM2/PPM1D/UVRAG/USP47/CUL3/RTF2/SIRT1/MARF1/AMBRA1/ATRX/STAG2/NBN/KLHL18/FBXW11/ROCK2/INO80/FOXJ3/TNKS/ACTR3/ATF2/KMT2E/IST1/CDKN1B
GO:0006796	GO:0006796	phosphate-containing compound metabolic process	279	0.247877	1.40926	0.0171697	0.0320018	0.0119596	801	tags=39%, list=29%, signal=30%	DUSP1/SKAP2/PRKCA/PDE4D/CD44/GNAQ/SIK3/FBXW7/PPP1R12A/MGAT5/SH3KBP1/NEK7/TNFAIP3/PPP1R15A/RPS6KA3/JUN/CD74/PTPN1/ACSL4/SGMS1/OSBPL8/ELOVL5/TFRC/PRKCH/PTPN9/PNPLA8/STK17B/CASK/SNRK/CDK17/DYRK1A/HNRNPU/OXSR1/PAK2/PIK3R1/TSPYL2/ETNK1/HSP90B1/SKAP1/ROCK1/BAZ1B/DLG1/MAP3K2/TNIK/SLA2/PTPN22/VRK1/SRPK2/NAMPT/PTP4A1/GSK3B/NOTCH2/TOP1/ERN1/OGDH/SMYD3/CBLB/MTM1/RBL2/ABI1/RICTOR/MOB3A/TGFBR2/CDK6/PDE8A/FNIP…
GO:0006950	GO:0006950	response to stress	283	0.240673	1.37268	0.0172317	0.0320018	0.0119596	742	tags=35%, list=27%, signal=28%	PARP8/NR3C1/FOS/DUSP1/EXT1/PRKCA/CD44/LMNA/SH3RF2/AHR/RBPJ/FUT8/PELI1/TNFSF4/NR4A2/IMMP2L/NFATC2/ZFP36/ZBTB38/NFKB1/TNFAIP3/FAS/PPP1R15A/CYSLTR1/HSPA5/HUWE1/FOXO1/JUN/CD74/PMAIP1/PSME4/BCLAF1/PTPN1/CD2/CD28/BTG2/PNPLA8/TNFRSF1B/JMY/OXSR1/ITPR1/SH2D1A/MYH9/IRF1/HSP90B1/XPR1/PJA2/STXBP4/DLG1/ARFGEF1/FOXO3/GSK3B/NOTCH2/ERN1/GRB2/SUSD6/SMAD3/RICTOR/CCNK/BCL2A1/FNIP1/PSPC1/B4GALT1/PPP1R10/ZFP36L2/ACTR…
GO:0006355	GO:0006355	regulation of DNA-templated transcription	287	0.245607	1.40196	0.0180526	0.0331618	0.0123931	513	tags=24%, list=19%, signal=22%	NR3C1/FOS/FOSB/YWHAZ/AHR/RBPJ/ETV6/PPP1R12A/PELI1/NR4A2/NFATC2/ZFP36/ID2/ZBTB38/NFKB1/RUNX1/TNFAIP3/NCOA2/NFATC3/CCNL1/IKZF3/FOXO1/JUN/CD74/BCLAF1/FUBP1/CD28/KLF6/FOXN2/SMARCA2/TFRC/BHLHE40/APBB2/JMY/ZHX2/CDK17/ZEB1/HNRNPU/EED/NR3C2/IRF1/ZNF644/CARD11/TESC/DLG1/CCNH/SLA2/NAMPT/FOXO3/MSL2/NOTCH2/RFX7/PHF21A/ZZZ3/SMYD3/L3MBTL3/MEF2A/RBL2/SMAD3/ZNF827/CCNK/PIAS1/PDE8A/KDM5A/FNIP1/RUNX3/PSPC1/PBX3
GO:0051253	GO:0051253	negative regulation of RNA metabolic process	101	0.300844	1.46143	0.0205914	0.0370556	0.0138482	505	tags=29%, list=18%, signal=24%	YWHAZ/TOB1/RBPJ/NR4A2/ZFP36/ID2/ZBTB38/NFKB1/NFATC3/JUN/BCLAF1/SMARCA2/APBB2/ZHX2/ZEB1/HNRNPU/EED/IRF1/DLG1/SLA2/NOTCH2/PHF21A/L3MBTL3/MEF2A/SMAD3/ZNF827/PIAS1/FNIP1/PSPC1
GO:0009057	GO:0009057	macromolecule catabolic process	190	0.26247	1.41675	0.0207788	0.0370556	0.0138482	794	tags=37%, list=29%, signal=29%	EXT1/CD44/NEDD4L/TOB1/SH3RF2/FBXW7/PELI1/ITCH/ZFP36/TNFAIP3/NEDD4/HSPA5/FOXO1/PSME4/BCLAF1/PTPN1/BTG2/USP36/RNF19A/ZHX2/HERC4/HNRNPU/WDR26/CAPN2/YTHDC1/HSP90B1/XPO1/ROCK1/PJA2/UBE2H/SMG6/GSK3B/RNASET2/CBLB/FBXO11/L3MBTL3/SND1/ZRANB1/USP9X/PIAS1/ZFP36L1/USP3/ANKIB1/IDS/ZFP36L2/ETF1/USP48/UBR1/ASCC3/VIM/FAF1/AZIN1/FHIT/PNRC2/DNAJC3/USP25/EDEM3/UBE3C/CNOT9/UVRAG/SMG1/USP47/CANX/CUL3/SIRT1/GLMN/ABHD1…
GO:1901575	GO:1901575	organic substance catabolic process	226	0.252505	1.39486	0.0208301	0.0370556	0.0138482	783	tags=35%, list=29%, signal=28%	PDE3B/EXT1/PDE4D/CD44/NEDD4L/TOB1/SH3RF2/FBXW7/PELI1/GALM/ITCH/ZFP36/TNFAIP3/NEDD4/HSPA5/FOXO1/PSME4/BCLAF1/PTPN1/CPQ/BTG2/PNPLA8/USP36/GLS/RNF19A/ZHX2/HERC4/HNRNPU/WDR26/CAPN2/YTHDC1/HSP90B1/XPO1/ROCK1/PJA2/UBE2H/SMG6/GSK3B/RNASET2/CBLB/FBXO11/L3MBTL3/SND1/ZRANB1/USP9X/PIAS1/ZFP36L1/PDE8A/USP3/ANKIB1/IDS/ZFP36L2/ETF1/USP48/UBR1/ASCC3/VIM/ATP2B4/FAF1/AZIN1/FHIT/PNRC2/DNAJC3/USP25/EDEM3/UBE3C/CNOT…
GO:0042981	GO:0042981	regulation of apoptotic process	132	0.280347	1.43643	0.0220786	0.0388675	0.0145254	526	tags=28%, list=19%, signal=24%	NR3C1/PRKCA/CD44/LMNA/SH3RF2/FBXW7/NR4A2/LGALS3/ZFP36/TNFAIP3/FAS/CHST11/HSPA5/IKZF3/FOXO1/JUN/CD74/BCLAF1/PTPN1/TFRC/STK17B/USP36/JMY/PAK2/HSP90B1/CARD11/ROCK1/IVNS1ABP/GSK3B/NOTCH2/FBXO11/IFI6/BCL2A1/FNIP1/B4GALT1/PPP1R10/RAF1
GO:0006351	GO:0006351	DNA-templated transcription	308	0.240199	1.37851	0.0228099	0.039741	0.0148518	513	tags=23%, list=19%, signal=21%	NR3C1/FOS/FOSB/YWHAZ/AHR/RBPJ/ETV6/PPP1R12A/PELI1/NR4A2/NFATC2/ZFP36/ID2/ZBTB38/NFKB1/RUNX1/TNFAIP3/NCOA2/NFATC3/CCNL1/IKZF3/FOXO1/JUN/CD74/BCLAF1/FUBP1/CD28/KLF6/FOXN2/SMARCA2/TFRC/BHLHE40/APBB2/JMY/ZHX2/CDK17/ZEB1/HNRNPU/EED/POLR2A/NR3C2/IRF1/ZNF644/CARD11/TESC/DLG1/CCNH/SLA2/SUPT3H/NAMPT/FOXO3/MSL2/NOTCH2/PHF3/RFX7/PHF21A/ZZZ3/SMYD3/GTF2B/L3MBTL3/MEF2A/RBL2/SMAD3/ZNF827/CCNK/PIAS1/PDE8A/KDM5A/…
GO:0045934	GO:0045934	negative regulation of nucleobase-containing compound metabolic process	110	0.29918	1.4871	0.023148	0.0399186	0.0149182	505	tags=29%, list=18%, signal=25%	YWHAZ/TOB1/RBPJ/NR4A2/ZFP36/ID2/ZBTB38/NFKB1/NFATC3/JUN/BCLAF1/SMARCA2/APBB2/ZHX2/ZEB1/HNRNPU/EED/TSPYL2/IRF1/DLG1/SMG6/SLA2/NOTCH2/PHF21A/PDS5A/L3MBTL3/MEF2A/SMAD3/ZNF827/PIAS1/FNIP1/PSPC1
GO:0032774	GO:0032774	RNA biosynthetic process	309	0.239119	1.3739	0.0256544	0.0437939	0.0163664	513	tags=23%, list=19%, signal=21%	NR3C1/FOS/FOSB/YWHAZ/AHR/RBPJ/ETV6/PPP1R12A/PELI1/NR4A2/NFATC2/ZFP36/ID2/ZBTB38/NFKB1/RUNX1/TNFAIP3/NCOA2/NFATC3/CCNL1/IKZF3/FOXO1/JUN/CD74/BCLAF1/FUBP1/CD28/KLF6/FOXN2/SMARCA2/TFRC/BHLHE40/APBB2/JMY/ZHX2/CDK17/ZEB1/HNRNPU/EED/POLR2A/NR3C2/IRF1/ZNF644/CARD11/TESC/DLG1/CCNH/SLA2/SUPT3H/NAMPT/FOXO3/MSL2/NOTCH2/PHF3/RFX7/PHF21A/ZZZ3/SMYD3/GTF2B/L3MBTL3/MEF2A/RBL2/SMAD3/ZNF827/CCNK/PIAS1/PDE8A/KDM5A/…
GO:0009894	GO:0009894	regulation of catabolic process	102	0.294207	1.43234	0.0273146	0.0461617	0.0172513	843	tags=41%, list=31%, signal=30%	PDE3B/TOB1/SH3RF2/FBXW7/ZFP36/TNFAIP3/FOXO1/PTPN1/BTG2/USP36/RNF19A/HNRNPU/YTHDC1/XPO1/ROCK1/FOXO3/GSK3B/CBLB/MTM1/L3MBTL3/USP9X/PIAS1/ZFP36L1/ANKIB1/ZFP36L2/RPTOR/VIM/ATP2B4/FAF1/AZIN1/FHIT/UVRAG/CUL3/SIRT1/GLMN/AMBRA1/UBQLN1/TRIM22/GNAI3/HIF1A/SCFD1/TUT7
