# Supplementary material for: T cell-mediated SIV dissemination into the CNS: a single-cell transcriptomic analysis
Source: Research Square preprint supplement (doi:10.21203/rs.3.rs-6537361/v1), 2025-05-09
Supplement: Supplementary file 11 [file d595b5d378c58f3d34efd8af.xlsx]

## Sheet: markers
p_val	avg_log2FC	pct.1	pct.2	p_val_adj	cluster	gene
0	1.39013	0.814	0.353	0	TRM	LTB
0	1.08047	0.748	0.58	0	TRM	JUNB
0	1.03378	0.767	0.577	0	TRM	FOS
0	0.950509	0.927	0.785	0	TRM	BTG1
0	0.940588	0.852	0.666	0	TRM	RPS15A
0	0.938815	0.656	0.351	0	TRM	IL7R
0	0.901934	0.417	0.161	0	TRM	ARHGAP10
0	0.896282	0.497	0.326	0	TRM	GZMK
0	0.881983	0.612	0.412	0	TRM	TUBA4A
0	0.826339	0.415	0.159	0	TRM	ITGA1
0	0.820945	0.33	0.145	0	TRM	ANK3
0	0.806091	0.787	0.494	0	TRM	PAG1
0	0.798876	0.969	0.886	0	TRM	RPS29
0	0.796459	0.943	0.831	0	TRM	RPL37A-1
0	0.791997	0.979	0.905	0	TRM	RPL30
0	0.787338	0.533	0.312	0	TRM	AKT3
0	0.787279	0.797	0.702	0	TRM	ZFP36
0	0.783119	0.5	0.306	0	TRM	ICOS
0	0.776055	0.865	0.71	0	TRM	RPL14
0	0.772014	0.515	0.303	0	TRM	ANTXR2
0	0.768163	0.804	0.74	0	TRM	ZFP36L2
0	0.766641	0.981	0.91	0	TRM	RPLP1
0	0.752266	0.446	0.238	0	TRM	AHR
0	0.749021	0.756	0.686	0	TRM	RGCC
0	0.748384	0.976	0.893	0	TRM	RPS14
0	0.746067	0.982	0.914	0	TRM	TPT1
0	0.745617	0.97	0.864	0	TRM	RPS28
0	0.73759	0.566	0.338	0	TRM	MPZL3
0	0.735441	0.979	0.897	0	TRM	RPS16
0	0.732559	0.957	0.846	0	TRM	RPS13
0	0.728727	0.968	0.883	0	TRM	RPS5
0	0.720643	0.667	0.514	0	TRM	THEMIS
0	0.700612	0.87	0.783	0	TRM	CD69
0	0.699933	0.859	0.663	0	TRM	LOC697476
0	0.694627	0.809	0.706	0	TRM	TENT5C
0	0.686361	0.777	0.652	0	TRM	FOSB
0	0.683922	0.944	0.892	0	TRM	JUND
0	0.683542	0.976	0.897	0	TRM	RPS10
0	0.681643	0.264	0.075	0	TRM	PCNX2
0	0.678993	0.956	0.845	0	TRM	RPL24
0	0.677432	0.98	0.903	0	TRM	RPS7
0	0.66455	0.975	0.904	0	TRM	RPS9
0	0.65939	0.978	0.9	0	TRM	RPL18
0	0.659057	0.954	0.857	0	TRM	RPL34
0	0.658368	0.982	0.915	0	TRM	RPL41
0	0.656314	0.482	0.319	0	TRM	TOB1
0	0.655008	0.963	0.889	0	TRM	RPL11
0	0.653996	0.743	0.58	0	TRM	LOC114674108
0	0.649925	0.969	0.874	0	TRM	RPL7A
0	0.647288	0.986	0.937	0	TRM	RPS18
0	0.640924	0.963	0.885	0	TRM	RPS26
0	0.640722	0.966	0.884	0	TRM	RPLP2
0	0.637139	0.973	0.895	0	TRM	RPL8
0	0.635238	0.979	0.91	0	TRM	RPS8
0	0.633268	0.643	0.479	0	TRM	SLC2A3
0	0.633219	0.648	0.503	0	TRM	FAM129A
0	0.628001	0.954	0.852	0	TRM	RPL10A
0	0.62799	0.607	0.43	0	TRM	NEDD4L
0	0.624817	0.985	0.935	0	TRM	RPL13
0	0.623705	0.959	0.862	0	TRM	RPL23A
0	0.622619	0.958	0.853	0	TRM	RPL12
0	0.621863	0.948	0.846	0	TRM	RPL9
0	0.617366	0.972	0.893	0	TRM	RPS21
0	0.616364	0.974	0.892	0	TRM	RPS23
0	0.615868	0.609	0.464	0	TRM	RBPJ
0	0.61481	0.982	0.913	0	TRM	RPL10
0	0.612209	0.967	0.881	0	TRM	RPL27A
0	0.611894	0.876	0.772	0	TRM	PNRC1
0	0.611601	0.96	0.861	0	TRM	RPS4X
0	0.611559	0.913	0.792	0	TRM	TOMM7
0	0.611323	0.407	0.227	0	TRM	DPP4
0	0.611298	0.945	0.847	0	TRM	RPS27
0	0.60494	0.96	0.874	0	TRM	RPL28
0	0.604908	0.975	0.894	0	TRM	RPS27A-1
0	0.603117	0.581	0.372	0	TRM	ZEB1
0	0.599718	0.904	0.793	0	TRM	RPS24
0	0.598983	0.37	0.171	0	TRM	ITGA6
0	0.59566	0.951	0.864	0	TRM	RPL38
0	0.59418	0.455	0.294	0	TRM	PLEKHG1
0	0.592473	0.966	0.887	0	TRM	RPS11
0	0.592162	0.956	0.863	0	TRM	LOC703455
0	0.591758	0.814	0.682	0	TRM	S100A6
0	0.585923	0.968	0.879	0	TRM	RPL19
0	0.582455	0.388	0.194	0	TRM	STX3
0	0.570105	0.961	0.868	0	TRM	RPL27
0	0.569727	0.964	0.878	0	TRM	RPL6
0	0.567204	0.948	0.853	0	TRM	RPL22
0	0.562949	0.433	0.274	0	TRM	NABP1
0	0.560469	0.745	0.61	0	TRM	PDE7A
0	0.556422	0.677	0.545	0	TRM	LOC716530
0	0.554948	0.934	0.828	0	TRM	RPL36
0	0.554565	0.688	0.562	0	TRM	RPL29
0	0.551917	0.934	0.849	0	TRM	VIM
0	0.549864	0.787	0.665	0	TRM	EEF1A1
0	0.545106	0.951	0.847	0	TRM	RPLP0
0	0.537693	0.923	0.819	0	TRM	RPL35A
0	0.528612	0.962	0.901	0	TRM	EIF1
0	0.528589	0.984	0.927	0	TRM	RPS19
0	0.523816	0.469	0.312	0	TRM	KCNA3
0	0.523394	0.385	0.216	0	TRM	SPINT2
0	0.513587	0.322	0.147	0	TRM	SLAMF1
0	0.512915	0.978	0.908	0	TRM	RPS12
0	0.511071	0.74	0.621	0	TRM	COMMD6
0	0.503463	0.584	0.378	0	TRM	COTL1
0	0.503333	0.335	0.131	0	TRM	LOC100423131
0	0.499471	0.967	0.889	0	TRM	UBA52
0	0.499243	0.787	0.652	0	TRM	RPL32
0	0.493576	0.911	0.81	0	TRM	EEF1B2
0	0.488801	0.854	0.738	0	TRM	RPS25
0	0.478027	0.933	0.859	0	TRM	RPL23
0	0.477527	0.954	0.873	0	TRM	RACK1
0	0.47432	0.946	0.856	0	TRM	NACA
0	0.463568	0.974	0.901	0	TRM	RPL3
0	0.46275	0.317	0.146	0	TRM	FAM102A
0	0.4572	0.953	0.861	0	TRM	LOC712274
0	0.45517	0.943	0.845	0	TRM	RPL15
0	0.451662	0.953	0.863	0	TRM	RPS20
0	0.449101	0.962	0.882	0	TRM	RPS3
0	0.444559	0.846	0.742	0	TRM	EEF1G
0	0.442322	0.974	0.901	0	TRM	FAU
0	0.441102	0.978	0.915	0	TRM	RPL13A
0	0.438002	0.38	0.222	0	TRM	CYB5A
0	0.433741	0.873	0.785	0	TRM	RPS17
0	0.42817	0.91	0.817	0	TRM	PFDN5
0	0.385714	0.354	0.176	0	TRM	SPOCK2
2.18781e-307	0.479169	0.678	0.522	7.70548e-303	TRM	PDE4B
3.22647e-306	0.551951	0.67	0.524	1.13636e-301	TRM	MPP7
5.08757e-303	0.484431	0.74	0.622	1.79184e-298	TRM	DUSP1
1.00623e-299	0.334275	0.976	0.916	3.54393e-295	TRM	RPS15
8.85394e-290	0.469215	0.844	0.793	3.11836e-285	TRM	PABPC1
2.08148e-286	0.410718	0.786	0.7	7.33098e-282	TRM	NDFIP1
1.96303e-285	0.440004	0.761	0.651	6.91378e-281	TRM	SMDT1
2.10098e-284	0.45092	0.799	0.687	7.39967e-280	TRM	MYL12A
2.51781e-273	0.400534	0.841	0.75	8.86771e-269	TRM	EIF3K
6.63744e-267	0.381104	0.871	0.768	2.33771e-262	TRM	NME2
2.69323e-266	0.51637	0.744	0.641	9.48556e-262	TRM	BICDL1
2.86426e-266	0.55412	0.337	0.19	1.00879e-261	TRM	NR3C2
1.06907e-262	0.417948	0.728	0.62	3.76527e-258	TRM	TTC39C
7.8913e-260	0.443216	0.8	0.707	2.77932e-255	TRM	ARHGAP26
3.27147e-257	0.576951	0.462	0.324	1.15221e-252	TRM	CTSW
4.88883e-257	0.426656	0.499	0.355	1.72185e-252	TRM	LOC716034
2.12715e-254	0.302791	0.938	0.846	7.49181e-250	TRM	RPS2
1.01931e-253	0.575305	0.667	0.552	3.59002e-249	TRM	FTH1
2.70434e-253	0.407783	0.791	0.725	9.52469e-249	TRM	CCNL1
3.3175e-250	0.31763	0.934	0.858	1.16842e-245	TRM	CD48
4.07806e-249	0.67739	0.553	0.406	1.43629e-244	TRM	LOC714964
7.96649e-249	0.322132	0.962	0.896	2.8058e-244	TRM	RPSA
2.23743e-248	0.453026	0.35	0.211	7.88023e-244	TRM	GPR65
2.27197e-241	0.440412	0.661	0.543	8.00188e-237	TRM	BTF3
1.35962e-236	0.520269	0.291	0.162	4.78856e-232	TRM	DUSP2
4.06078e-236	0.414471	0.804	0.704	1.43021e-231	TRM	LOC703365
1.721e-233	0.486954	0.541	0.415	6.06135e-229	TRM	GALM
2.14056e-232	0.345217	0.89	0.853	7.53905e-228	TRM	STK17A
3.83425e-232	0.55054	0.74	0.642	1.35042e-227	TRM	JUN
5.08322e-232	0.546104	0.717	0.609	1.79031e-227	TRM	INPP4B
2.33319e-229	0.398958	0.708	0.628	8.21748e-225	TRM	NPM1
2.50164e-228	0.427485	0.646	0.536	8.81077e-224	TRM	ERN1
2.28715e-227	0.468523	0.946	0.895	8.05533e-223	TRM	UBC
2.97854e-223	0.339733	0.9	0.827	1.04904e-218	TRM	EEF1D
6.82744e-222	0.593253	0.528	0.392	2.40462e-217	TRM	IMMP2L
9.60315e-222	0.364682	0.959	0.949	3.38223e-217	TRM	LOC708686
1.431e-217	0.393163	0.931	0.929	5.03997e-213	TRM	SIK3
1.57891e-217	0.403915	0.342	0.209	5.56093e-213	TRM	ZNF618
3.56093e-214	0.422488	0.819	0.731	1.25416e-209	TRM	CAMK4
1.6742e-213	0.312112	0.946	0.874	5.89652e-209	TRM	RPL5
3.04539e-210	0.356516	0.664	0.536	1.07259e-205	TRM	PLAAT3
6.39194e-209	0.385293	0.674	0.572	2.25124e-204	TRM	MIF
7.53636e-208	0.377008	0.872	0.844	2.65431e-203	TRM	ITK
7.6704e-207	0.448601	0.306	0.183	2.70152e-202	TRM	TNFRSF10D
3.69247e-203	0.419661	0.828	0.778	1.30049e-198	TRM	SRSF7
1.21353e-202	0.27153	0.991	0.963	4.27406e-198	TRM	TMSB4X
4.53263e-201	0.444948	0.351	0.225	1.59639e-196	TRM	PTGER4
2.14098e-199	0.457999	0.483	0.377	7.54053e-195	TRM	COA1
1.50415e-198	0.424713	0.519	0.408	5.2976e-194	TRM	ALDOA
3.995e-196	0.425124	0.455	0.346	1.40704e-191	TRM	SEPTIN1
1.30077e-195	0.284179	0.916	0.847	4.58132e-191	TRM	HSP90AB1
2.80906e-193	0.424179	0.808	0.75	9.89352e-189	TRM	FAM107B
4.08827e-192	0.391366	0.73	0.63	1.43989e-187	TRM	CHN2
2.01559e-190	0.504183	0.569	0.46	7.09891e-186	TRM	RGS1
3.1579e-190	0.423328	0.532	0.415	1.11221e-185	TRM	LOC114674016
7.50237e-188	0.325467	0.811	0.763	2.64233e-183	TRM	MGAT5
6.69116e-183	0.317293	0.929	0.916	2.35663e-178	TRM	CHD2
6.60636e-182	0.506683	0.264	0.155	2.32676e-177	TRM	TNF
1.72263e-179	0.369173	0.807	0.751	6.06709e-175	TRM	MAMU-A3
4.54609e-175	0.28301	0.925	0.83	1.60113e-170	TRM	FTL
1.11609e-174	0.369881	0.668	0.597	3.93088e-170	TRM	TOMM20
2.40879e-173	0.368975	0.729	0.644	8.48377e-169	TRM	RPL36AL
1.53728e-172	0.366772	0.274	0.172	5.4143e-168	TRM	DDT
1.47161e-169	0.339287	0.767	0.678	5.18301e-165	TRM	LOC106998836
1.63406e-168	0.286048	0.842	0.772	5.75517e-164	TRM	LOC703029
1.41893e-166	0.320897	0.316	0.205	4.99748e-162	TRM	DHRS3
2.24437e-160	0.337323	0.468	0.335	7.90468e-156	TRM	MYO1D
4.20531e-160	0.378306	0.346	0.235	1.48111e-155	TRM	KDM6B
1.19085e-158	0.268566	0.927	0.835	4.19416e-154	TRM	RPL17
1.28783e-156	0.263626	0.951	0.882	4.53575e-152	TRM	RPL21
1.81909e-156	0.377929	0.459	0.337	6.40682e-152	TRM	GPRIN3
5.9514e-155	0.370553	0.889	0.865	2.09608e-150	TRM	KLF6
7.41814e-155	0.391769	0.409	0.31	2.61267e-150	TRM	CUTA
7.76422e-153	0.340675	0.677	0.594	2.73456e-148	TRM	KRTCAP2
1.96518e-152	0.324091	0.266	0.169	6.92138e-148	TRM	DENND2D
9.0616e-152	0.339902	0.274	0.174	3.1915e-147	TRM	INPP5A
3.38601e-151	0.389571	0.846	0.827	1.19255e-146	TRM	EZR
6.35775e-150	0.436405	0.477	0.373	2.2392e-145	TRM	RASGEF1B
3.3777e-148	0.305021	0.812	0.769	1.18963e-143	TRM	SRSF5
5.71693e-148	0.372036	0.525	0.434	2.0135e-143	TRM	USP36
1.06069e-147	0.260785	0.926	0.835	3.73576e-143	TRM	ATP5F1E
1.17093e-146	0.308396	0.704	0.617	4.12401e-142	TRM	CD3E
9.46648e-143	0.399438	0.368	0.27	3.33409e-138	TRM	SOCS1
4.35996e-142	0.477801	0.6	0.501	1.53558e-137	TRM	RPL37A
3.32361e-141	0.304819	0.745	0.674	1.17057e-136	TRM	RPL26
1.09138e-139	0.368936	0.783	0.744	3.84384e-135	TRM	SARAF
4.03719e-138	0.340839	0.596	0.51	1.4219e-133	TRM	OST4
6.20778e-138	0.357284	0.388	0.294	2.18638e-133	TRM	CKLF
9.45785e-138	0.33018	0.309	0.209	3.33106e-133	TRM	MAN1C1
2.41892e-137	0.483906	0.628	0.552	8.51944e-133	TRM	AHI1
2.94813e-137	0.520392	0.676	0.635	1.03833e-132	TRM	NR4A2
2.83149e-135	0.31691	0.818	0.798	9.97249e-131	TRM	ARIH1
9.55865e-135	0.396397	0.632	0.566	3.36655e-130	TRM	RHOH
1.96077e-133	0.387094	0.75	0.706	6.90584e-129	TRM	HSPA5
6.08481e-132	0.381995	0.385	0.288	2.14307e-127	TRM	NFKBIZ
8.46095e-132	0.516352	0.345	0.251	2.97995e-127	TRM	ATF3
7.41757e-131	0.363829	0.36	0.273	2.61247e-126	TRM	LOC698942
2.18369e-129	0.431357	0.609	0.549	7.69096e-125	TRM	PRDX6
3.45505e-127	0.33995	0.563	0.488	1.21687e-122	TRM	C19H19orf53
8.55438e-126	0.377864	0.607	0.52	3.01285e-121	TRM	MAMU-A
3.89323e-125	0.367194	0.371	0.277	1.3712e-120	TRM	GATA3
5.86173e-124	0.330471	0.778	0.75	2.0645e-119	TRM	DDX3X
6.00117e-124	0.284294	0.704	0.634	2.11361e-119	TRM	SSR4
2.08005e-123	0.433247	0.454	0.359	7.32592e-119	TRM	EXT1
3.68563e-120	0.297506	0.691	0.621	1.29808e-115	TRM	ATP5MC2
4.27513e-119	0.429219	0.462	0.383	1.5057e-114	TRM	GADD45B
6.74023e-118	0.352712	0.514	0.425	2.37391e-113	TRM	SFMBT2
2.6474e-117	0.576209	0.663	0.613	9.32416e-113	TRM	LOC701976
3.99083e-117	0.336421	0.615	0.538	1.40557e-112	TRM	LOC107000401
9.07179e-117	0.358015	0.692	0.64	3.19508e-112	TRM	IER2
2.49767e-116	0.318791	0.264	0.176	8.79678e-112	TRM	CRIM1
3.31072e-111	0.36917	0.349	0.262	1.16604e-106	TRM	PRMT9
3.57311e-111	0.330787	0.371	0.292	1.25845e-106	TRM	RPS27A
2.9683e-108	0.296312	0.758	0.687	1.04543e-103	TRM	BCL2
8.18993e-108	0.316293	0.337	0.255	2.88449e-103	TRM	FLT3LG
5.25942e-107	0.32237	0.507	0.442	1.85237e-102	TRM	RAP1A
1.47436e-104	0.276623	0.692	0.632	5.19271e-100	TRM	EIF3F
3.75513e-104	0.302532	0.288	0.211	1.32256e-99	TRM	LOC711798
5.0004e-104	0.29024	0.328	0.237	1.76114e-99	TRM	ZNF827
1.0959e-103	0.32994	0.815	0.802	3.85976e-99	TRM	FYB1
3.55573e-103	0.410779	0.598	0.568	1.25233e-98	TRM	RBMS1
2.78563e-102	0.341575	0.54	0.487	9.81099e-98	TRM	SENP7
6.12535e-102	0.353845	0.354	0.271	2.15735e-97	TRM	CSRNP1
8.76e-101	0.286274	0.329	0.248	3.08527e-96	TRM	PDCD4
1.26343e-100	0.338533	0.743	0.703	4.44981e-96	TRM	TSC22D3
1.80951e-100	0.301279	0.578	0.526	6.37308e-96	TRM	RSL24D1
5.48179e-99	0.257671	0.901	0.89	1.93069e-94	TRM	CD44
2.31124e-98	0.290594	0.52	0.457	8.14019e-94	TRM	CD2
5.35501e-98	0.327949	0.837	0.835	1.88603e-93	TRM	NR3C1
4.42745e-96	0.302952	0.273	0.194	1.55935e-91	TRM	ZNF331
1.10518e-95	0.342749	0.507	0.453	3.89243e-91	TRM	HNRNPA0
1.14971e-95	0.282313	0.585	0.521	4.04929e-91	TRM	C5H4orf3
5.40717e-94	0.288136	0.697	0.659	1.9044e-89	TRM	YPEL5
5.73641e-94	0.279336	0.783	0.775	2.02037e-89	TRM	MYCBP2
2.73703e-93	0.327723	0.439	0.379	9.63981e-89	TRM	REX1BD
8.54243e-93	0.315282	0.713	0.69	3.00864e-88	TRM	DNAJB6
5.5163e-91	0.294095	0.729	0.7	1.94284e-86	TRM	DOCK10
5.57507e-91	0.259162	0.716	0.687	1.96354e-86	TRM	GOLGA4
6.4231e-91	0.320805	0.547	0.481	2.26222e-86	TRM	CCDC91
5.93415e-90	0.336469	0.421	0.346	2.09001e-85	TRM	LMBR1
9.20259e-90	0.316728	0.44	0.357	3.24115e-85	TRM	SYNE2
1.0834e-89	0.401944	0.321	0.24	3.81574e-85	TRM	GPR183
2.40315e-89	0.305076	0.631	0.587	8.46391e-85	TRM	ARF4
2.26038e-87	0.3884	0.288	0.21	7.96105e-83	TRM	NR4A3
3.18755e-87	0.294893	0.339	0.264	1.12266e-82	TRM	SLC7A5
4.23413e-86	0.288885	0.307	0.235	1.49126e-81	TRM	FUOM
7.10373e-85	0.4023	0.48	0.409	2.50193e-80	TRM	ZSWIM4
5.23633e-84	0.263097	0.577	0.523	1.84423e-79	TRM	SEPTIN6
1.18209e-83	0.322878	0.59	0.537	4.16334e-79	TRM	TC2N
2.7547e-83	0.311716	0.391	0.324	9.70205e-79	TRM	TSPO
2.87682e-81	0.29075	0.567	0.511	1.01322e-76	TRM	RPL39
3.2447e-81	0.276518	0.39	0.313	1.14278e-76	TRM	HNRNPLL
1.69343e-79	0.258565	0.743	0.711	5.96426e-75	TRM	LOC106996627
2.29322e-79	0.260226	0.635	0.593	8.07673e-75	TRM	TNFAIP8
3.06054e-78	0.270643	0.477	0.418	1.07792e-73	TRM	TRMT112
1.44038e-77	0.331972	0.458	0.402	5.07302e-73	TRM	NCOA7
4.47462e-77	0.345675	0.497	0.44	1.57596e-72	TRM	BTG2
9.04696e-77	0.336332	0.716	0.721	3.18634e-72	TRM	SOS1
5.24821e-76	0.290571	0.291	0.222	1.84842e-71	TRM	TSPYL2
2.35027e-75	0.312655	0.473	0.414	8.27766e-71	TRM	CCNH
5.39917e-75	0.272177	0.542	0.503	1.90159e-70	TRM	DDX24
2.11192e-74	0.36444	0.593	0.547	7.43818e-70	TRM	NFKBIA
3.65695e-74	0.297155	0.274	0.21	1.28798e-69	TRM	LOC114679035
1.07689e-73	0.305679	0.548	0.493	3.7928e-69	TRM	GAS7
1.35766e-73	0.341855	0.672	0.647	4.78169e-69	TRM	TNFAIP3
4.80966e-73	0.308295	0.422	0.358	1.69396e-68	TRM	LOC702677
1.53761e-68	0.281246	0.339	0.283	5.41547e-64	TRM	LOC714598
1.5454e-68	0.278251	0.666	0.647	5.44289e-64	TRM	MCL1
8.01623e-68	0.370122	0.443	0.387	2.82332e-63	TRM	BCL2A1
1.10923e-66	0.279285	0.473	0.424	3.9067e-62	TRM	LOC704147
2.77776e-65	0.258026	0.287	0.219	9.78327e-61	TRM	CSF1
3.36998e-65	0.330927	0.542	0.492	1.18691e-60	TRM	LOC114669857
1.39365e-64	0.299496	0.759	0.704	4.90844e-60	TRM	RPL37
1.70938e-64	0.424737	0.258	0.199	6.02044e-60	TRM	LOC704510
2.00399e-61	0.272417	0.265	0.209	7.05804e-57	TRM	LOC706496
1.57257e-60	0.335808	0.563	0.531	5.53859e-56	TRM	PPP1R15A
6.75251e-60	0.25485	0.347	0.294	2.37823e-55	TRM	TMEM14C
7.939e-59	0.277048	0.502	0.442	2.79612e-54	TRM	GNAQ
9.91336e-58	0.320645	0.372	0.321	3.49149e-53	TRM	NAMPT
1.52466e-56	0.342161	0.752	0.77	5.36984e-52	TRM	DENND4A
3.27925e-56	0.304905	0.393	0.339	1.15495e-51	TRM	ST6GAL1
1.02387e-54	0.259455	0.399	0.354	3.60608e-50	TRM	VAMP8
4.86903e-53	0.255255	0.412	0.357	1.71487e-48	TRM	LOC107000013
1.08732e-52	0.349903	0.829	0.833	3.82955e-48	TRM	ID2
1.49032e-52	0.264993	0.557	0.509	5.24891e-48	TRM	SSBP2
3.04334e-51	0.284414	0.475	0.436	1.07186e-46	TRM	IFRD1
1.69232e-50	0.389978	0.58	0.563	5.96035e-46	TRM	CDC14A
2.02378e-48	0.251595	0.341	0.291	7.12777e-44	TRM	CCDC97
1.65385e-44	0.2566	0.566	0.526	5.82488e-40	TRM	LOC708994
1.99674e-43	0.263869	0.457	0.433	7.03252e-39	TRM	RHOF
1.10699e-40	0.347639	0.448	0.427	3.89883e-36	TRM	SERTAD1
5.19944e-33	0.283566	0.389	0.352	1.83124e-28	TRM	ELL2
4.24517e-32	0.2554	0.264	0.226	1.49515e-27	TRM	IER5
1.1827e-26	0.263107	0.339	0.306	4.16548e-22	TRM	CASK
1.34015e-14	0.342356	0.475	0.486	4.71999e-10	TRM	ITGB1
7.27261e-12	0.259879	0.329	0.314	2.56141e-07	TRM	BACH2
0	1.20949	0.966	0.772	0	CD4+CTL	S100A10
0	1.20492	0.94	0.497	0	CD4+CTL	GZMH
0	1.19301	0.381	0.127	0	CD4+CTL	ARHGAP32
0	1.05274	0.425	0.098	0	CD4+CTL	NHSL2
0	1.04329	0.45	0.176	0	CD4+CTL	ROR2
0	1.02716	0.555	0.179	0	CD4+CTL	GPR141
0	0.989415	0.865	0.492	0	CD4+CTL	KLF2
0	0.975597	0.812	0.377	0	CD4+CTL	RAP1GAP2
0	0.957656	0.942	0.614	0	CD4+CTL	ZEB2
0	0.923852	0.627	0.324	0	CD4+CTL	CLIC5
0	0.900326	0.893	0.595	0	CD4+CTL	RGS9
0	0.899435	0.651	0.333	0	CD4+CTL	KLF3
0	0.895922	0.912	0.665	0	CD4+CTL	BABAM2
0	0.879173	0.335	0.108	0	CD4+CTL	TNFRSF18
0	0.860733	0.786	0.48	0	CD4+CTL	TGFBR3
0	0.806908	0.344	0.1	0	CD4+CTL	FRY
0	0.801467	0.982	0.865	0	CD4+CTL	S100A4
0	0.799249	0.541	0.225	0	CD4+CTL	CX3CR1
0	0.77785	0.602	0.361	0	CD4+CTL	CD226
0	0.774662	0.85	0.648	0	CD4+CTL	SYNE1
0	0.769773	0.841	0.567	0	CD4+CTL	FLNA
0	0.746199	0.99	0.671	0	CD4+CTL	GZMB
0	0.738389	0.433	0.185	0	CD4+CTL	IL7
0	0.734827	0.609	0.332	0	CD4+CTL	JAKMIP2
0	0.725777	0.825	0.634	0	CD4+CTL	ITGA4
0	0.711908	0.535	0.272	0	CD4+CTL	CAPG
0	0.709656	0.598	0.337	0	CD4+CTL	DOCK5
0	0.695039	0.98	0.878	0	CD4+CTL	CD52
0	0.694688	0.766	0.597	0	CD4+CTL	ATP2B4
0	0.694665	0.982	0.825	0	CD4+CTL	NKG7
0	0.684078	0.963	0.859	0	CD4+CTL	SH3BGRL3
0	0.681614	0.57	0.394	0	CD4+CTL	PTMS
0	0.672935	0.673	0.444	0	CD4+CTL	KLRD1
0	0.667399	0.511	0.306	0	CD4+CTL	ITM2A
0	0.666448	0.896	0.715	0	CD4+CTL	CD3G
0	0.646288	0.606	0.402	0	CD4+CTL	CD84
0	0.6289	0.968	0.892	0	CD4+CTL	RIPOR2
0	0.627233	0.347	0.141	0	CD4+CTL	LOC106999823
0	0.627095	0.66	0.466	0	CD4+CTL	MTPN
0	0.623228	0.366	0.138	0	CD4+CTL	TSPAN2
0	0.618016	0.337	0.153	0	CD4+CTL	C1H1orf21
0	0.613556	0.861	0.664	0	CD4+CTL	SLCO3A1
0	0.612924	0.521	0.332	0	CD4+CTL	SH3BP5
0	0.610406	0.644	0.34	0	CD4+CTL	C11H12orf75
0	0.607891	0.569	0.33	0	CD4+CTL	GOLIM4
0	0.59684	0.933	0.813	0	CD4+CTL	AHNAK
0	0.596446	0.624	0.462	0	CD4+CTL	OXSR1
0	0.58986	0.4	0.187	0	CD4+CTL	KLRG1
0	0.589826	0.767	0.59	0	CD4+CTL	LOC701976
0	0.58643	0.657	0.447	0	CD4+CTL	ISCA1
0	0.574062	0.513	0.337	0	CD4+CTL	ATXN7L1
0	0.572123	0.757	0.529	0	CD4+CTL	ANXA2
0	0.569023	0.412	0.229	0	CD4+CTL	CLEC12A
0	0.564277	0.422	0.225	0	CD4+CTL	PRR5L
0	0.563156	0.757	0.607	0	CD4+CTL	RAPGEF2
0	0.55774	0.615	0.392	0	CD4+CTL	LOC114675357
0	0.556649	0.771	0.567	0	CD4+CTL	ITGB2
0	0.551793	0.323	0.149	0	CD4+CTL	RHOBTB3
0	0.545019	0.943	0.83	0	CD4+CTL	CRIP1
0	0.53797	0.667	0.501	0	CD4+CTL	FAR1
0	0.530269	0.592	0.412	0	CD4+CTL	STK38
0	0.518514	0.89	0.744	0	CD4+CTL	ANXA1
0	0.515972	0.861	0.718	0	CD4+CTL	PTPRJ
0	0.506237	0.309	0.146	0	CD4+CTL	ABCA1
0	0.506211	0.865	0.719	0	CD4+CTL	LOC114669767
0	0.505733	0.571	0.375	0	CD4+CTL	SSBP4
0	0.505001	0.323	0.133	0	CD4+CTL	ADGRG1
0	0.501148	0.32	0.16	0	CD4+CTL	SLCO4C1
0	0.49831	0.269	0.117	0	CD4+CTL	FGFBP2
0	0.497388	0.331	0.152	0	CD4+CTL	PLEKHG3
0	0.496244	0.926	0.844	0	CD4+CTL	RABGAP1L
0	0.488715	0.927	0.765	0	CD4+CTL	CST7
0	0.487259	0.928	0.857	0	CD4+CTL	KLF12
0	0.483388	0.693	0.513	0	CD4+CTL	CEMIP2
0	0.454289	0.877	0.732	0	CD4+CTL	EMP3
0	0.433896	0.871	0.78	0	CD4+CTL	DIAPH1
0	0.402915	0.999	0.984	0	CD4+CTL	B2M
0	0.39039	0.939	0.798	0	CD4+CTL	CD3D
0	0.369528	0.955	0.905	0	CD4+CTL	AKAP13
3.259e-306	0.458548	0.391	0.22	1.14782e-301	CD4+CTL	PLEK
7.28563e-303	0.592947	0.586	0.414	2.566e-298	CD4+CTL	TMTC2
1.24511e-297	0.447355	0.647	0.463	4.38526e-293	CD4+CTL	HEG1
1.38611e-297	0.546781	0.394	0.226	4.88188e-293	CD4+CTL	TMEM156
6.95253e-297	0.387623	0.65	0.447	2.44868e-292	CD4+CTL	PRF1
4.69641e-296	0.404973	0.98	0.909	1.65408e-291	CD4+CTL	TMSB10
6.62799e-292	0.471185	0.622	0.435	2.33438e-287	CD4+CTL	ARID5B
5.95177e-288	0.440525	0.772	0.64	2.09621e-283	CD4+CTL	PPP3CC
9.95043e-288	0.443096	0.705	0.553	3.50454e-283	CD4+CTL	GLIPR2
3.03353e-279	0.409338	0.284	0.14	1.06841e-274	CD4+CTL	SYT11
4.79785e-274	0.491467	0.566	0.394	1.6898e-269	CD4+CTL	CD6
6.23408e-273	0.472161	0.79	0.635	2.19564e-268	CD4+CTL	LOC705095
6.67321e-269	0.573197	0.473	0.317	2.3503e-264	CD4+CTL	TTC3
2.74369e-268	0.363789	0.938	0.829	9.66329e-264	CD4+CTL	UBB
4.56189e-267	0.368723	0.819	0.699	1.6067e-262	CD4+CTL	SORL1
9.80325e-267	0.43728	0.454	0.28	3.4527e-262	CD4+CTL	FAM49A
3.46101e-263	0.514122	0.358	0.207	1.21897e-258	CD4+CTL	LOC114677679
5.71351e-262	0.415178	0.712	0.58	2.0123e-257	CD4+CTL	SPATA13
1.42352e-261	0.465839	0.739	0.59	5.01362e-257	CD4+CTL	TXNIP
6.96409e-259	0.433771	0.417	0.25	2.45275e-254	CD4+CTL	KLRF1
1.64626e-255	0.4068	0.75	0.601	5.79813e-251	CD4+CTL	SYTL2
3.39604e-253	0.43959	0.369	0.22	1.19609e-248	CD4+CTL	CERKL
2.7077e-252	0.47666	0.759	0.641	9.53652e-248	CD4+CTL	ARHGEF3
1.37031e-251	0.433733	0.513	0.353	4.82623e-247	CD4+CTL	C15H9orf16
1.77002e-248	0.291505	0.982	0.901	6.23402e-244	CD4+CTL	LOC705671
3.77506e-246	0.409053	0.588	0.432	1.32958e-241	CD4+CTL	MYO1G
9.98137e-246	0.455301	0.804	0.71	3.51544e-241	CD4+CTL	PIK3R5
2.3261e-243	0.338562	0.968	0.919	8.19253e-239	CD4+CTL	LOC707383
3.39848e-238	0.441721	0.283	0.153	1.19695e-233	CD4+CTL	GDE1
3.18204e-237	0.418642	0.292	0.156	1.12071e-232	CD4+CTL	SERPINA1
4.35498e-237	0.382807	0.675	0.54	1.53382e-232	CD4+CTL	MOB2
7.28118e-235	0.300821	0.975	0.916	2.56443e-230	CD4+CTL	CALM1
3.2399e-230	0.353883	0.894	0.797	1.14109e-225	CD4+CTL	DNAJC1
1.45499e-228	0.387366	0.603	0.457	5.12447e-224	CD4+CTL	MADD
3.00874e-227	0.431484	0.579	0.429	1.05968e-222	CD4+CTL	ZBTB38
3.29235e-221	0.366279	0.91	0.844	1.15956e-216	CD4+CTL	TNIK
5.55496e-221	0.448965	0.519	0.373	1.95646e-216	CD4+CTL	CIB1
1.12931e-220	0.339626	0.917	0.869	3.97743e-216	CD4+CTL	PPP1R12A
1.40444e-220	0.403731	0.351	0.211	4.94645e-216	CD4+CTL	USP28
9.36214e-220	0.468578	0.503	0.365	3.29735e-215	CD4+CTL	AP1S2
4.23911e-219	0.412074	0.835	0.737	1.49301e-214	CD4+CTL	PPP3CA
7.1811e-219	0.429195	0.469	0.315	2.52918e-214	CD4+CTL	AGPAT4
3.63782e-215	0.31302	0.873	0.747	1.28124e-210	CD4+CTL	ARPC1B
6.50416e-215	0.272497	0.989	0.974	2.29076e-210	CD4+CTL	PTPRC
5.2035e-212	0.484755	0.769	0.661	1.83267e-207	CD4+CTL	LRRC8C
2.35062e-211	0.309702	0.585	0.41	8.2789e-207	CD4+CTL	UCP2
2.79532e-211	0.389611	0.679	0.554	9.84513e-207	CD4+CTL	TMEM50A
3.00433e-211	0.390622	0.397	0.256	1.05812e-206	CD4+CTL	TBX21
6.55112e-211	0.343366	0.922	0.788	2.3073e-206	CD4+CTL	HCST
1.57583e-210	0.418807	0.375	0.227	5.55008e-206	CD4+CTL	CLECL1
5.24895e-208	0.361737	0.752	0.639	1.84868e-203	CD4+CTL	BIN2
5.65204e-208	0.401641	0.562	0.424	1.99065e-203	CD4+CTL	IDS
1.69941e-204	0.541562	0.48	0.337	5.98532e-200	CD4+CTL	TFDP2
4.89187e-203	0.400128	0.486	0.348	1.72292e-198	CD4+CTL	REXO2
7.41252e-203	0.393921	0.377	0.239	2.61069e-198	CD4+CTL	P2RY8
2.4526e-202	0.426966	0.315	0.184	8.63805e-198	CD4+CTL	CMAH
8.05534e-200	0.413026	0.863	0.772	2.83709e-195	CD4+CTL	LOC703029
2.95032e-199	0.327566	0.297	0.169	1.0391e-194	CD4+CTL	LOC107000617
2.43532e-195	0.305753	0.981	0.904	8.57719e-191	CD4+CTL	MAMU-AG
5.9166e-192	0.405687	0.424	0.29	2.08383e-187	CD4+CTL	SLAMF6
8.77111e-190	0.488531	0.416	0.276	3.08919e-185	CD4+CTL	LOC114671905
1.02138e-188	0.393458	0.303	0.178	3.59732e-184	CD4+CTL	MAMU-DQB1
1.43757e-188	0.530132	0.462	0.321	5.06313e-184	CD4+CTL	APBB2
2.80181e-188	0.314523	0.805	0.653	9.86796e-184	CD4+CTL	LOC114669738
3.10657e-186	0.436195	0.435	0.304	1.09413e-181	CD4+CTL	LOC701439
1.78111e-182	0.298207	0.87	0.777	6.27308e-178	CD4+CTL	MSN
1.8458e-182	0.341059	0.561	0.408	6.50092e-178	CD4+CTL	LOC106993126
7.92785e-177	0.352987	0.473	0.342	2.79219e-172	CD4+CTL	FAM53B
1.8433e-176	0.31874	0.88	0.81	6.49209e-172	CD4+CTL	FBXW7
2.8937e-176	0.268156	0.333	0.201	1.01916e-171	CD4+CTL	PTTG1
7.9369e-176	0.346479	0.333	0.211	2.79538e-171	CD4+CTL	PRR5
2.22538e-175	0.362904	0.342	0.219	7.83778e-171	CD4+CTL	GLRX
9.03251e-175	0.322837	0.818	0.686	3.18125e-170	CD4+CTL	TSC22D3
2.23819e-174	0.373512	0.281	0.164	7.88292e-170	CD4+CTL	PAFAH2
6.71536e-173	0.320956	0.946	0.861	2.36515e-168	CD4+CTL	CD48
2.25572e-172	0.318553	0.356	0.229	7.94464e-168	CD4+CTL	RASGRP2
1.58541e-171	0.328318	0.402	0.261	5.58381e-167	CD4+CTL	MAMU-DRB1
2.21657e-171	0.384359	0.378	0.254	7.80678e-167	CD4+CTL	SRM
1.34745e-170	0.372133	0.659	0.554	4.74572e-166	CD4+CTL	RAB27A
1.99806e-170	0.323869	0.845	0.76	7.03717e-166	CD4+CTL	IQGAP2
7.8844e-170	0.788709	0.935	0.874	2.77689e-165	CD4+CTL	HSP90AA1
7.0222e-169	0.382262	0.707	0.592	2.47322e-164	CD4+CTL	SNTB1
8.25419e-168	0.439343	0.422	0.301	2.90713e-163	CD4+CTL	TMEM154
6.39605e-165	0.299175	0.848	0.733	2.25269e-160	CD4+CTL	SELENOW
9.55502e-165	0.336425	0.296	0.178	3.36528e-160	CD4+CTL	CA5B
3.81561e-163	0.359272	0.252	0.143	1.34386e-158	CD4+CTL	STAMBPL1
1.76256e-161	0.274287	0.679	0.525	6.20773e-157	CD4+CTL	PPP2R2B
8.22589e-160	0.348329	0.639	0.541	2.89716e-155	CD4+CTL	NLRC5
2.31178e-157	0.323826	0.373	0.25	8.14209e-153	CD4+CTL	RASA3
3.34857e-157	0.2741	0.857	0.736	1.17937e-152	CD4+CTL	MYL6
3.5139e-157	0.437583	0.728	0.647	1.23759e-152	CD4+CTL	FKBP5
9.35639e-157	0.291706	0.864	0.803	3.29532e-152	CD4+CTL	MBP
9.50076e-157	0.31475	0.678	0.566	3.34617e-152	CD4+CTL	ATP2B1
2.00744e-156	0.350272	0.492	0.371	7.07019e-152	CD4+CTL	SLC25A4
5.40849e-155	0.343023	0.736	0.603	1.90487e-150	CD4+CTL	S100A11
2.16155e-154	0.445071	0.313	0.196	7.61298e-150	CD4+CTL	GADD45A
2.93737e-154	0.333064	0.64	0.527	1.03454e-149	CD4+CTL	SERPINB9
3.9385e-153	0.363598	0.62	0.508	1.38714e-148	CD4+CTL	CCSER2
8.53932e-153	0.278123	0.737	0.63	3.00755e-148	CD4+CTL	ITGAL
1.53955e-151	0.333546	0.765	0.668	5.42228e-147	CD4+CTL	AAK1
7.16679e-151	0.367064	0.493	0.364	2.52415e-146	CD4+CTL	TPD52
3.22019e-148	0.269721	0.772	0.642	1.13415e-143	CD4+CTL	LOC106993196
3.33092e-145	0.351361	0.486	0.377	1.17315e-140	CD4+CTL	KIAA0040
3.71412e-145	0.365645	0.485	0.37	1.30811e-140	CD4+CTL	KIAA1257
6.3098e-145	0.339296	0.824	0.702	2.22231e-140	CD4+CTL	IFI27L2
2.57409e-144	0.314194	0.776	0.698	9.06595e-140	CD4+CTL	LRRFIP1
4.47207e-142	0.327166	0.534	0.421	1.57506e-137	CD4+CTL	MGST3
1.47983e-141	0.35417	0.344	0.226	5.21195e-137	CD4+CTL	SETBP1
3.77362e-141	0.342514	0.478	0.362	1.32907e-136	CD4+CTL	ILRUN
1.05257e-140	0.317702	0.466	0.352	3.70717e-136	CD4+CTL	EFCC1
3.36961e-140	0.250909	0.95	0.897	1.18678e-135	CD4+CTL	PRKCH
7.19913e-140	0.315937	0.3	0.194	2.53553e-135	CD4+CTL	ENPP4
1.70592e-139	0.290167	0.756	0.653	6.00825e-135	CD4+CTL	STK39
2.12666e-139	0.335483	0.267	0.162	7.49009e-135	CD4+CTL	LOC114669810
5.32651e-139	0.265811	0.757	0.628	1.876e-134	CD4+CTL	MYL12B
1.10322e-138	0.331242	0.571	0.467	3.88555e-134	CD4+CTL	BRD7
1.22446e-138	0.306333	0.826	0.755	4.31256e-134	CD4+CTL	INPP4A
1.2836e-138	0.301579	0.701	0.613	4.52084e-134	CD4+CTL	TLN1
2.75062e-138	0.274533	0.624	0.501	9.68767e-134	CD4+CTL	TESC
6.64826e-138	0.306621	0.403	0.289	2.34152e-133	CD4+CTL	PXN
1.32115e-135	0.384924	0.321	0.214	4.65308e-131	CD4+CTL	INPP5F
1.16551e-134	0.296699	0.314	0.204	4.10492e-130	CD4+CTL	IL18
2.24327e-133	0.255534	0.611	0.494	7.90081e-129	CD4+CTL	RUNX3
2.6255e-133	0.297566	0.304	0.2	9.247e-129	CD4+CTL	SPN
3.70279e-133	0.371037	0.606	0.502	1.30412e-128	CD4+CTL	RASSF3
1.17706e-130	0.339377	0.771	0.668	4.1456e-126	CD4+CTL	PDE3B
2.88668e-129	0.361037	0.546	0.438	1.01669e-124	CD4+CTL	LOC695267
9.39184e-129	0.258174	0.773	0.671	3.30781e-124	CD4+CTL	YWHAB
1.93548e-128	0.433255	0.307	0.205	6.81676e-124	CD4+CTL	DISP1
4.16184e-125	0.26964	0.696	0.573	1.4658e-120	CD4+CTL	LYST
1.8873e-124	0.367427	0.365	0.258	6.64707e-120	CD4+CTL	ETS2
1.98775e-124	0.264439	0.764	0.67	7.00087e-120	CD4+CTL	TNFRSF1B
5.89521e-124	1.65791	0.271	0.183	2.07629e-119	CD4+CTL	HSPA1A
1.14126e-123	0.435028	0.626	0.54	4.01952e-119	CD4+CTL	RRAS2
1.33786e-123	0.287414	0.622	0.507	4.71194e-119	CD4+CTL	DBI
2.18516e-122	0.392112	0.632	0.519	7.69612e-118	CD4+CTL	LOC114677644
3.22645e-121	0.295536	0.449	0.346	1.13635e-116	CD4+CTL	AP2M1
4.85982e-121	0.29131	0.357	0.25	1.71163e-116	CD4+CTL	RHOC
5.0024e-121	0.275104	0.784	0.694	1.76185e-116	CD4+CTL	FXYD5
5.27984e-121	0.331126	0.404	0.305	1.85956e-116	CD4+CTL	PTTG1IP
9.04961e-119	0.295321	0.527	0.427	3.18727e-114	CD4+CTL	REEP5
1.38087e-116	0.285429	0.561	0.451	4.86341e-112	CD4+CTL	DYNLL1
3.35142e-115	0.307049	0.605	0.517	1.18037e-110	CD4+CTL	AGPS
4.71337e-115	0.298462	0.581	0.485	1.66005e-110	CD4+CTL	OSTF1
1.12966e-113	0.319627	0.594	0.497	3.97865e-109	CD4+CTL	ARHGAP25
5.55561e-111	0.282395	0.305	0.196	1.95668e-106	CD4+CTL	PDGFD
3.92308e-109	0.321769	0.546	0.45	1.38171e-104	CD4+CTL	RB1
7.6983e-109	0.31834	0.368	0.271	2.71134e-104	CD4+CTL	NRROS
8.95941e-109	0.283016	0.577	0.477	3.15551e-104	CD4+CTL	RABAC1
1.10587e-108	0.26347	0.677	0.592	3.89489e-104	CD4+CTL	LNPEP
9.39857e-108	0.327723	0.418	0.316	3.31018e-103	CD4+CTL	TUBA1A
9.99021e-108	0.283041	0.372	0.279	3.51855e-103	CD4+CTL	CDC42SE1
2.16432e-107	0.32586	0.466	0.369	7.62274e-103	CD4+CTL	UBL3
1.10152e-105	0.265357	0.772	0.697	3.87956e-101	CD4+CTL	SRPK2
3.00772e-105	0.311984	0.705	0.617	1.05932e-100	CD4+CTL	LOC114672190
5.40222e-105	0.275346	0.347	0.251	1.90266e-100	CD4+CTL	POM121C
1.67264e-104	0.268435	0.609	0.523	5.89102e-100	CD4+CTL	XPO6
4.75686e-103	0.272425	0.381	0.284	1.67537e-98	CD4+CTL	CPT1A
1.19363e-102	0.267107	0.554	0.467	4.20398e-98	CD4+CTL	ADD1
1.55783e-102	0.280856	0.396	0.302	5.48667e-98	CD4+CTL	CAPN2
2.29598e-101	0.346979	0.36	0.264	8.08644e-97	CD4+CTL	DAPK2
4.32991e-101	0.301295	0.627	0.541	1.525e-96	CD4+CTL	ISG20
6.14541e-101	0.33298	0.601	0.508	2.16441e-96	CD4+CTL	BCAS3
1.57616e-100	0.27717	0.346	0.25	5.55122e-96	CD4+CTL	PARP15
2.08806e-100	0.28557	0.481	0.39	7.35414e-96	CD4+CTL	HERPUD2
2.73474e-99	0.26096	0.728	0.662	9.63174e-95	CD4+CTL	CAST
4.0208e-99	0.274615	0.393	0.298	1.41612e-94	CD4+CTL	MXD4
1.95142e-98	0.26669	0.272	0.182	6.87289e-94	CD4+CTL	RNF144A
5.06827e-97	0.261533	0.572	0.478	1.78504e-92	CD4+CTL	DHRS7
2.29924e-95	0.321389	0.402	0.303	8.09793e-91	CD4+CTL	HLCS
2.23605e-94	0.292489	0.523	0.433	7.87536e-90	CD4+CTL	TRERF1
3.39952e-94	0.30857	0.347	0.249	1.19731e-89	CD4+CTL	PLEKHA5
1.1484e-93	0.252096	0.553	0.46	4.04467e-89	CD4+CTL	ARPC5L
1.27478e-93	0.250624	0.607	0.509	4.48977e-89	CD4+CTL	NKG2D
7.29128e-93	0.263783	0.571	0.486	2.56799e-88	CD4+CTL	PTP4A2
1.75403e-92	0.312995	0.423	0.328	6.17768e-88	CD4+CTL	MYO9A
4.18381e-92	0.313325	0.255	0.17	1.47354e-87	CD4+CTL	ITGAV
6.79953e-91	0.300674	0.698	0.626	2.39479e-86	CD4+CTL	TAOK3
1.08458e-90	0.265006	0.321	0.233	3.8199e-86	CD4+CTL	NISCH
1.87623e-87	0.255254	0.321	0.234	6.60809e-83	CD4+CTL	LOC710961
7.66511e-87	0.256968	0.37	0.284	2.69965e-82	CD4+CTL	IER3IP1
2.12144e-85	0.30223	0.332	0.243	7.47172e-81	CD4+CTL	FER
6.91655e-85	0.267647	0.336	0.251	2.43601e-80	CD4+CTL	ULK2
1.14241e-83	0.289422	0.467	0.383	4.02356e-79	CD4+CTL	DNAJB14
1.24297e-83	0.265677	0.34	0.257	4.37774e-79	CD4+CTL	TBPL1
1.47844e-83	0.262374	0.409	0.322	5.20707e-79	CD4+CTL	WDFY1
2.4708e-83	0.262902	0.263	0.185	8.70216e-79	CD4+CTL	SERTAD3
8.97948e-79	0.304205	0.548	0.473	3.16257e-74	CD4+CTL	LOC114671808
3.00801e-78	0.290181	0.307	0.222	1.05942e-73	CD4+CTL	PAM
1.13522e-77	0.369687	0.46	0.378	3.99824e-73	CD4+CTL	CAMKMT
2.21122e-77	0.261927	0.505	0.433	7.78792e-73	CD4+CTL	CCDC82
7.09977e-77	0.316128	0.325	0.244	2.50054e-72	CD4+CTL	VCL
7.98887e-77	0.252331	0.653	0.593	2.81368e-72	CD4+CTL	MARK3
2.1104e-75	0.252045	0.539	0.464	7.43283e-71	CD4+CTL	RESF1
6.28844e-75	0.319088	0.49	0.411	2.21479e-70	CD4+CTL	EHBP1
1.43262e-73	1.06719	0.321	0.26	5.04568e-69	CD4+CTL	DNAJB1
3.00384e-73	0.271545	0.361	0.28	1.05795e-68	CD4+CTL	UBE2Q2
5.3632e-70	0.266304	0.578	0.508	1.88892e-65	CD4+CTL	C11H12orf57
3.95413e-68	0.278045	0.349	0.275	1.39264e-63	CD4+CTL	ADIPOR2
6.03382e-61	0.324013	0.404	0.341	2.12511e-56	CD4+CTL	EMB
5.11382e-58	0.255666	0.587	0.499	1.80109e-53	CD4+CTL	LOC100426197
6.81857e-58	0.271358	0.403	0.336	2.4015e-53	CD4+CTL	TXNDC11
2.61016e-57	0.339228	0.445	0.389	9.19297e-53	CD4+CTL	LOC106992273
8.79455e-57	0.25304	0.434	0.367	3.09744e-52	CD4+CTL	RSU1
3.26605e-54	0.304643	0.345	0.286	1.1503e-49	CD4+CTL	HSPA4
2.53041e-52	0.25924	0.469	0.411	8.91211e-48	CD4+CTL	NUDC
2.62208e-47	0.310293	0.454	0.399	9.23496e-43	CD4+CTL	CAPN7
3.48546e-44	0.710675	0.585	0.559	1.22758e-39	CD4+CTL	HSPH1
1.87903e-42	0.265551	0.325	0.269	6.61794e-38	CD4+CTL	LOC694538
2.47949e-37	0.316277	0.486	0.44	8.73276e-33	CD4+CTL	HSPE1
9.99946e-27	0.30601	0.46	0.436	3.52181e-22	CD4+CTL	CHORDC1
1.73398e-20	0.558246	0.407	0.394	6.10707e-16	CD4+CTL	HSPD1
0	2.14191	0.97	0.656	0	CD8+ Effector	GNLY
0	2.0913	0.872	0.257	0	CD8+ Effector	MYO1E
0	1.99234	0.649	0.114	0	CD8+ Effector	KLRC3
0	1.7519	0.82	0.213	0	CD8+ Effector	TXK
0	1.72536	0.893	0.416	0	CD8+ Effector	UBASH3B
0	1.60208	0.685	0.102	0	CD8+ Effector	FCGR3
0	1.49367	0.581	0.166	0	CD8+ Effector	PDGFD
0	1.44633	0.715	0.284	0	CD8+ Effector	IKZF2
0	1.42895	0.515	0.248	0	CD8+ Effector	TYROBP
0	1.40235	0.938	0.637	0	CD8+ Effector	CCL5
0	1.35993	0.694	0.173	0	CD8+ Effector	PRSS57
0	1.35528	0.971	0.679	0	CD8+ Effector	BABAM2
0	1.30388	0.944	0.538	0	CD8+ Effector	GZMH
0	1.26788	0.445	0.075	0	CD8+ Effector	CLNK
0	1.19916	0.544	0.209	0	CD8+ Effector	PLCB1
0	1.18068	0.437	0.092	0	CD8+ Effector	KLRC2
0	1.15525	0.98	0.702	0	CD8+ Effector	GZMB
0	1.12981	0.515	0.265	0	CD8+ Effector	MTSS1
0	1.12913	0.684	0.302	0	CD8+ Effector	APBB2
0	1.1044	0.308	0.055	0	CD8+ Effector	COL11A1
0	1.10314	0.974	0.64	0	CD8+ Effector	ZEB2
0	1.08099	0.312	0.05	0	CD8+ Effector	ITGAD
0	1.05134	0.481	0.084	0	CD8+ Effector	AFAP1L2
0	1.04135	0.711	0.303	0	CD8+ Effector	GZMA
0	1.01689	0.536	0.189	0	CD8+ Effector	ROR2
0	1.01192	0.286	0.106	0	CD8+ Effector	FCER1G
0	1.00915	0.514	0.102	0	CD8+ Effector	LAT2
0	0.989593	0.754	0.433	0	CD8+ Effector	ARID5B
0	0.960041	0.495	0.148	0	CD8+ Effector	C1H1orf21
0	0.956018	0.69	0.335	0	CD8+ Effector	RIN3
0	0.941095	0.839	0.414	0	CD8+ Effector	RAP1GAP2
0	0.938608	0.629	0.271	0	CD8+ Effector	FAM49A
0	0.933671	0.944	0.616	0	CD8+ Effector	RGS9
0	0.904974	0.539	0.209	0	CD8+ Effector	SETBP1
0	0.900831	0.859	0.575	0	CD8+ Effector	VAV3
0	0.890563	0.843	0.583	0	CD8+ Effector	HOPX
0	0.878519	0.485	0.206	0	CD8+ Effector	CD38
0	0.878064	0.794	0.448	0	CD8+ Effector	KLRD1
0	0.868494	0.994	0.95	0	CD8+ Effector	PITPNC1
0	0.862635	0.63	0.333	0	CD8+ Effector	FAM102B
0	0.831318	0.748	0.452	0	CD8+ Effector	PRF1
0	0.823177	0.8	0.458	0	CD8+ Effector	HEG1
0	0.808609	0.503	0.198	0	CD8+ Effector	IL7
0	0.799684	0.573	0.211	0	CD8+ Effector	GPR141
0	0.789282	0.469	0.222	0	CD8+ Effector	LYN
0	0.782553	0.96	0.843	0	CD8+ Effector	NKG7
0	0.780252	0.764	0.461	0	CD8+ Effector	GRK5
0	0.7731	0.829	0.585	0	CD8+ Effector	SNTB1
0	0.710848	0.422	0.197	0	CD8+ Effector	HIVEP3
0	0.708178	0.347	0.12	0	CD8+ Effector	FGFBP2
0	0.704608	0.581	0.313	0	CD8+ Effector	AGPAT4
0	0.70015	0.435	0.179	0	CD8+ Effector	CMAH
0	0.699196	0.901	0.636	0	CD8+ Effector	LOC106993196
0	0.686603	0.313	0.06	0	CD8+ Effector	SPRY2
0	0.686489	0.525	0.235	0	CD8+ Effector	RHOC
0	0.658268	0.899	0.677	0	CD8+ Effector	SLCO3A1
0	0.656528	0.343	0.082	0	CD8+ Effector	ITGAX
0	0.655704	0.969	0.857	0	CD8+ Effector	KLF12
0	0.645022	0.423	0.21	0	CD8+ Effector	INPP5F
0	0.633051	0.418	0.152	0	CD8+ Effector	RHOBTB3
0	0.622949	0.823	0.566	0	CD8+ Effector	LYST
0	0.620279	0.984	0.898	0	CD8+ Effector	PRKCH
0	0.616262	0.617	0.345	0	CD8+ Effector	GOLIM4
0	0.609243	0.421	0.194	0	CD8+ Effector	THY1
0	0.608873	0.68	0.413	0	CD8+ Effector	PIK3AP1
0	0.606795	0.831	0.577	0	CD8+ Effector	ITGB2
0	0.605836	0.741	0.495	0	CD8+ Effector	TESC
0	0.589923	0.395	0.14	0	CD8+ Effector	ADGRG1
0	0.577121	0.519	0.251	0	CD8+ Effector	KLRF1
0	0.57408	0.382	0.155	0	CD8+ Effector	LOC106999823
0	0.574024	0.281	0.077	0	CD8+ Effector	RAB27B
0	0.570958	0.272	0.096	0	CD8+ Effector	MAMLD1
0	0.568407	0.828	0.604	0	CD8+ Effector	SYTL2
0	0.56403	0.919	0.782	0	CD8+ Effector	CST7
0	0.558033	0.343	0.141	0	CD8+ Effector	FAM3C
0	0.555596	0.843	0.53	0	CD8+ Effector	KLF2
0	0.541264	0.543	0.254	0	CD8+ Effector	CX3CR1
0	0.53163	0.335	0.115	0	CD8+ Effector	ITGAM
0	0.530998	0.385	0.174	0	CD8+ Effector	RNF144A
0	0.516268	0.317	0.108	0	CD8+ Effector	CMA1
0	0.515714	0.684	0.404	0	CD8+ Effector	PDE4D
0	0.467223	0.386	0.175	0	CD8+ Effector	NCR3
0	0.41845	0.647	0.368	0	CD8+ Effector	C11H12orf75
2.66193e-304	0.50457	0.908	0.771	9.37532e-300	CD8+ Effector	PPP2R5C
5.95264e-297	0.475673	0.819	0.596	2.09652e-292	CD8+ Effector	FLNA
1.1064e-296	0.474079	0.309	0.121	3.89674e-292	CD8+ Effector	LOC711031
3.6024e-296	0.508057	0.691	0.458	1.26877e-291	CD8+ Effector	MADD
8.62644e-295	0.523506	0.876	0.71	3.03823e-290	CD8+ Effector	RAPGEF1
2.77364e-272	0.427639	0.913	0.779	9.76877e-268	CD8+ Effector	MSN
5.82689e-271	0.83059	0.698	0.465	2.05223e-266	CD8+ Effector	LOC100430627
2.91601e-269	0.621086	0.874	0.737	1.02702e-264	CD8+ Effector	CD247
4.34914e-269	0.481096	0.856	0.666	1.53177e-264	CD8+ Effector	SYNE1
9.29824e-269	0.395478	0.29	0.123	3.27484e-264	CD8+ Effector	TM6SF1
9.87213e-268	0.464216	0.607	0.37	3.47696e-263	CD8+ Effector	KLF3
3.06745e-264	0.467086	0.758	0.52	1.08035e-259	CD8+ Effector	CEMIP2
1.29006e-262	0.491132	0.83	0.644	4.54359e-258	CD8+ Effector	PPP3CC
3.95397e-261	0.443535	0.909	0.799	1.39259e-256	CD8+ Effector	S100A10
7.47272e-260	0.453285	0.671	0.451	2.63189e-255	CD8+ Effector	ARPC5L
1.02206e-257	0.516452	0.872	0.728	3.59968e-253	CD8+ Effector	PTPN22
1.27686e-257	0.473351	0.442	0.243	4.4971e-253	CD8+ Effector	PTPN6
3.16284e-253	0.407787	0.433	0.23	1.11395e-248	CD8+ Effector	PLEK
1.85842e-252	0.508138	0.959	0.868	6.54534e-248	CD8+ Effector	CBLB
2.35663e-251	0.527557	0.831	0.644	8.30004e-247	CD8+ Effector	LOC705095
2.99962e-250	0.472183	0.477	0.271	1.05647e-245	CD8+ Effector	UBE2Q2
3.58985e-249	0.596445	0.554	0.34	1.26434e-244	CD8+ Effector	TFDP2
3.37444e-248	0.495382	0.28	0.12	1.18848e-243	CD8+ Effector	CDKL5
1.65292e-245	0.444458	0.608	0.388	5.82157e-241	CD8+ Effector	SSBP4
2.21422e-245	0.434461	0.438	0.238	7.79849e-241	CD8+ Effector	METRNL
1.40838e-243	0.427789	0.973	0.898	4.96031e-239	CD8+ Effector	RIPOR2
1.53816e-243	0.566458	0.609	0.404	5.41739e-239	CD8+ Effector	FAM126A
2.59376e-243	0.458987	0.363	0.185	9.13524e-239	CD8+ Effector	CASP10
2.84277e-242	0.493028	0.259	0.109	1.00122e-237	CD8+ Effector	GK5
3.90989e-240	0.441545	0.473	0.274	1.37706e-235	CD8+ Effector	GTF3C1
2.76017e-237	0.480153	0.837	0.657	9.7213e-233	CD8+ Effector	ABLIM1
2.95829e-231	0.434367	0.347	0.171	1.04191e-226	CD8+ Effector	SLCO4C1
3.24452e-231	0.37328	0.976	0.907	1.14272e-226	CD8+ Effector	AKAP13
4.84036e-231	0.468335	0.773	0.586	1.70478e-226	CD8+ Effector	LNPEP
4.07886e-227	0.508591	0.383	0.207	1.43658e-222	CD8+ Effector	UBE2F
1.26446e-226	0.67251	0.356	0.186	4.45344e-222	CD8+ Effector	CD7
5.16441e-224	0.73209	0.531	0.334	1.8189e-219	CD8+ Effector	KLRB1
2.14917e-223	0.531361	0.55	0.349	7.56937e-219	CD8+ Effector	ATXN7L1
2.61975e-223	0.472399	0.266	0.116	9.22676e-219	CD8+ Effector	AOAH
5.44811e-223	0.373004	0.766	0.512	1.91882e-218	CD8+ Effector	TGFBR3
1.15805e-222	0.410144	0.736	0.544	4.07865e-218	CD8+ Effector	MOB2
1.03917e-220	0.454324	0.892	0.738	3.65994e-216	CD8+ Effector	PPP3CA
2.52502e-220	0.437374	0.479	0.288	8.89312e-216	CD8+ Effector	PXN
6.39245e-220	0.514282	0.458	0.271	2.25142e-215	CD8+ Effector	ME2
3.88746e-216	0.4429	0.579	0.378	1.36916e-211	CD8+ Effector	CIB1
5.92984e-216	0.459733	0.537	0.344	2.08849e-211	CD8+ Effector	TPST2
1.75125e-211	0.409784	0.397	0.218	6.16791e-207	CD8+ Effector	USP28
4.20751e-210	0.373096	0.253	0.113	1.48189e-205	CD8+ Effector	CLCN7
5.85253e-208	0.448718	0.63	0.425	2.06126e-203	CD8+ Effector	LRMP
8.32786e-207	0.386347	0.332	0.168	2.93307e-202	CD8+ Effector	PAFAH2
8.09163e-206	0.525421	0.587	0.395	2.84987e-201	CD8+ Effector	KIF1B
2.86745e-202	0.344565	0.253	0.112	1.00992e-197	CD8+ Effector	SLC11A1
1.95834e-198	0.463106	0.539	0.343	6.89726e-194	CD8+ Effector	MCTP2
1.10043e-193	0.390911	0.933	0.842	3.87573e-189	CD8+ Effector	UTRN
1.18965e-191	0.376639	0.433	0.253	4.18996e-187	CD8+ Effector	RASA3
4.41848e-188	0.407657	0.612	0.43	1.55619e-183	CD8+ Effector	IDS
1.49205e-187	0.360026	0.323	0.166	5.25498e-183	CD8+ Effector	TSPAN2
3.31594e-187	0.352821	0.691	0.494	1.16788e-182	CD8+ Effector	RUNX3
1.49495e-186	0.391005	0.877	0.742	5.26521e-182	CD8+ Effector	SEMA4D
1.49657e-186	0.414882	0.95	0.848	5.27091e-182	CD8+ Effector	RABGAP1L
8.0146e-186	0.657005	0.539	0.381	2.82274e-181	CD8+ Effector	LOC106992273
2.0708e-185	0.374005	0.924	0.81	7.29335e-181	CD8+ Effector	FBXW7
1.70631e-184	0.354842	0.637	0.44	6.00961e-180	CD8+ Effector	MYO1G
4.68231e-184	0.439864	0.432	0.254	1.64911e-179	CD8+ Effector	PLCG2
1.68233e-181	0.380114	0.406	0.239	5.92516e-177	CD8+ Effector	SLC44A2
1.0824e-179	0.316563	0.979	0.922	3.8122e-175	CD8+ Effector	LOC707383
1.3063e-178	0.392991	0.867	0.736	4.6008e-174	CD8+ Effector	CDK17
9.21192e-178	0.318259	0.902	0.756	3.24444e-173	CD8+ Effector	ANXA1
1.74048e-177	0.360457	0.42	0.243	6.12998e-173	CD8+ Effector	PRR5L
2.24337e-174	0.334968	0.955	0.886	7.90116e-170	CD8+ Effector	JAK1
6.44679e-174	0.359408	0.418	0.25	2.27056e-169	CD8+ Effector	POM121C
1.14331e-172	0.384253	0.544	0.363	4.02672e-168	CD8+ Effector	C15H9orf16
4.49707e-172	0.393698	0.525	0.354	1.58387e-167	CD8+ Effector	SFT2D1
1.22593e-171	0.323548	0.916	0.801	4.31774e-167	CD8+ Effector	SEPTIN7
2.51845e-171	0.386054	0.823	0.653	8.86999e-167	CD8+ Effector	STK39
3.41709e-171	0.385606	0.707	0.528	1.2035e-166	CD8+ Effector	SERPINB9
9.81613e-171	0.372336	0.531	0.353	3.45724e-166	CD8+ Effector	EFCC1
5.5137e-170	0.380704	0.814	0.663	1.94193e-165	CD8+ Effector	PTPRA
1.86596e-169	0.365534	0.502	0.326	6.57191e-165	CD8+ Effector	PLEKHA1
3.89736e-166	0.371618	0.751	0.587	1.37265e-161	CD8+ Effector	SPATA13
3.98512e-165	0.354055	0.774	0.608	1.40356e-160	CD8+ Effector	CYTIP
4.62459e-165	0.403784	0.847	0.713	1.62878e-160	CD8+ Effector	PIK3R5
2.67769e-164	0.314696	0.566	0.373	9.43084e-160	CD8+ Effector	CCL4L1
2.22122e-162	0.364115	0.292	0.148	7.82312e-158	CD8+ Effector	NHSL2
1.25636e-160	0.619069	0.523	0.349	4.42488e-156	CD8+ Effector	LOC100426632
3.48391e-159	0.329656	0.372	0.216	1.22703e-154	CD8+ Effector	MATK
4.37738e-155	0.342913	0.721	0.554	1.54171e-150	CD8+ Effector	CAP1
2.37693e-153	0.33928	0.523	0.347	8.37155e-149	CD8+ Effector	FAM53B
1.86476e-152	0.418533	0.486	0.32	6.56767e-148	CD8+ Effector	ABCC1
3.97343e-152	0.413011	0.616	0.449	1.39944e-147	CD8+ Effector	RB1
1.44724e-151	0.365803	0.708	0.536	5.09716e-147	CD8+ Effector	RRAS2
7.54619e-150	0.323029	0.887	0.774	2.65777e-145	CD8+ Effector	RNF149
1.87425e-149	0.425836	0.468	0.303	6.60112e-145	CD8+ Effector	HLCS
5.05157e-149	0.360774	0.879	0.754	1.77916e-144	CD8+ Effector	INPP4A
1.12966e-148	0.347533	0.607	0.433	3.97865e-144	CD8+ Effector	KIF13B
1.18889e-148	0.368333	0.682	0.521	4.18725e-144	CD8+ Effector	XPO6
6.78811e-148	0.303623	0.646	0.469	2.39077e-143	CD8+ Effector	ISCA1
1.14939e-147	0.556415	0.463	0.305	4.04814e-143	CD8+ Effector	IL12RB2
9.09325e-147	0.343303	0.656	0.497	3.20264e-142	CD8+ Effector	SRI
4.88741e-145	0.328695	0.565	0.394	1.72135e-140	CD8+ Effector	EFHD2
7.18087e-145	0.295121	0.39	0.236	2.5291e-140	CD8+ Effector	RASGRP2
9.72896e-143	0.368694	0.914	0.845	3.42654e-138	CD8+ Effector	CRIP1
1.29769e-142	0.337182	0.541	0.376	4.57047e-138	CD8+ Effector	DERL1
4.35887e-142	0.384348	0.713	0.556	1.53519e-137	CD8+ Effector	RAB27A
1.22431e-141	0.372311	0.54	0.38	4.31203e-137	CD8+ Effector	DNAJB14
1.46378e-141	0.363902	0.818	0.664	5.15544e-137	CD8+ Effector	LRRC8C
3.44937e-140	0.42096	0.552	0.397	1.21487e-135	CD8+ Effector	CSPP1
3.42597e-136	0.331341	0.482	0.322	1.20663e-131	CD8+ Effector	NUCB2
9.52244e-135	0.406611	0.63	0.485	3.3538e-130	CD8+ Effector	CCND2
2.53688e-134	0.342619	0.367	0.227	8.93488e-130	CD8+ Effector	GLRX
6.98741e-134	0.308806	0.927	0.828	2.46097e-129	CD8+ Effector	VPS13B
1.19037e-131	0.449669	0.442	0.295	4.19249e-127	CD8+ Effector	SPTLC2
1.20388e-130	0.34211	0.87	0.735	4.24008e-126	CD8+ Effector	DOCK2
1.42956e-130	0.398913	0.338	0.202	5.03492e-126	CD8+ Effector	CERS6
2.10552e-130	0.30084	0.632	0.469	7.41564e-126	CD8+ Effector	CCDC69
5.08681e-129	0.303228	0.82	0.697	1.79158e-124	CD8+ Effector	FXYD5
6.59978e-128	0.333203	0.668	0.516	2.32444e-123	CD8+ Effector	AGPS
1.202e-127	0.344178	0.512	0.351	4.23346e-123	CD8+ Effector	SH3BP5
5.98092e-127	0.338331	0.261	0.14	2.10648e-122	CD8+ Effector	TNFRSF18
1.66983e-126	0.3173	0.546	0.393	5.88116e-122	CD8+ Effector	PRKAR1A
2.73038e-126	0.352543	0.482	0.331	9.61639e-122	CD8+ Effector	TASP1
2.77348e-126	0.528452	0.289	0.164	9.76818e-122	CD8+ Effector	ARHGAP32
1.22031e-125	0.365598	0.504	0.356	4.29795e-121	CD8+ Effector	SLA
3.53607e-125	0.31986	0.86	0.76	1.2454e-120	CD8+ Effector	ARPC1B
2.84795e-124	0.29329	0.837	0.709	1.00305e-119	CD8+ Effector	ACTR3
7.78912e-124	0.307871	0.787	0.642	2.74333e-119	CD8+ Effector	MAPK1
2.30695e-123	0.350264	0.425	0.28	8.12508e-119	CD8+ Effector	DGKD
5.36479e-123	0.257502	0.896	0.773	1.88948e-118	CD8+ Effector	INPP5D
8.03194e-122	0.306807	0.441	0.299	2.82885e-117	CD8+ Effector	PDAP1
1.13085e-121	0.329492	0.908	0.816	3.98284e-117	CD8+ Effector	SCML4
1.79587e-121	0.279039	0.593	0.425	6.32506e-117	CD8+ Effector	UCP2
2.30691e-121	0.38348	0.43	0.287	8.12495e-117	CD8+ Effector	TIGIT
1.46413e-118	0.294429	0.634	0.488	5.15667e-114	CD8+ Effector	MTPN
3.14446e-117	0.307055	0.76	0.614	1.10748e-112	CD8+ Effector	ATP2B4
1.62665e-115	0.254624	0.262	0.147	5.72905e-111	CD8+ Effector	NOTCH1
2.18748e-115	0.278073	0.41	0.267	7.70432e-111	CD8+ Effector	TBX21
2.20165e-115	0.854515	0.312	0.205	7.75422e-111	CD8+ Effector	CMC1
2.98708e-114	0.310929	0.307	0.179	1.05205e-109	CD8+ Effector	LOC100426537
3.27014e-114	0.294265	0.404	0.269	1.15174e-109	CD8+ Effector	NTAN1
3.3499e-113	0.315072	0.38	0.244	1.17984e-108	CD8+ Effector	TMEM156
1.51465e-112	0.317083	0.301	0.179	5.3346e-108	CD8+ Effector	FNIP2
1.62252e-112	0.517621	0.306	0.188	5.71451e-108	CD8+ Effector	TIMP1
2.94411e-112	0.325682	0.52	0.378	1.03692e-107	CD8+ Effector	SLC25A4
8.35253e-112	0.282127	0.363	0.228	2.94176e-107	CD8+ Effector	STX11
1.079e-110	0.294768	0.632	0.486	3.80024e-106	CD8+ Effector	OSTF1
1.08447e-110	0.277006	0.9	0.803	3.81949e-106	CD8+ Effector	MBP
8.26106e-110	0.280901	0.473	0.331	2.90954e-105	CD8+ Effector	ABHD17A
1.2341e-108	0.288277	0.481	0.343	4.34651e-104	CD8+ Effector	CTSA
2.86664e-108	0.286713	0.673	0.533	1.00963e-103	CD8+ Effector	TMEM181
1.13987e-107	0.326727	0.594	0.45	4.01462e-103	CD8+ Effector	CSNK1G1
1.21472e-107	0.391397	0.672	0.542	4.27824e-103	CD8+ Effector	STAT3
2.16313e-107	0.262311	0.633	0.479	7.61855e-103	CD8+ Effector	SEPTIN11
1.29749e-105	0.250308	0.505	0.358	4.56975e-101	CD8+ Effector	REXO2
1.36895e-105	0.334506	0.316	0.192	4.82143e-101	CD8+ Effector	PLAC8
1.61682e-105	0.270622	0.897	0.796	5.69446e-101	CD8+ Effector	MAPRE2
6.69149e-104	0.258501	0.348	0.222	2.35674e-99	CD8+ Effector	ACOT7
7.97832e-103	0.279187	0.457	0.314	2.80997e-98	CD8+ Effector	ARHGAP9
1.03602e-102	0.271274	0.372	0.247	3.64888e-98	CD8+ Effector	TTC1
6.00442e-102	0.290947	0.484	0.348	2.11476e-97	CD8+ Effector	CLN3
1.18836e-101	0.271295	0.741	0.594	4.18539e-97	CD8+ Effector	PTPN4
1.34594e-101	0.339541	0.715	0.583	4.74042e-97	CD8+ Effector	FBXL17
1.62626e-101	0.257437	0.358	0.232	5.72769e-97	CD8+ Effector	TSPAN32
2.17241e-101	0.27083	0.254	0.146	7.65121e-97	CD8+ Effector	RIPK2
8.11027e-100	0.385466	0.599	0.469	2.85644e-95	CD8+ Effector	ITPKB
2.60683e-98	0.260882	0.659	0.518	9.18127e-94	CD8+ Effector	FAR1
4.90721e-98	0.274345	0.608	0.459	1.72832e-93	CD8+ Effector	MTMR12
7.57741e-98	0.330266	0.61	0.471	2.66876e-93	CD8+ Effector	LOC114671808
2.49459e-97	0.307247	0.558	0.423	8.78594e-93	CD8+ Effector	RNF115
7.26061e-97	0.305112	0.528	0.396	2.55719e-92	CD8+ Effector	PYHIN1
2.968e-96	0.271244	0.548	0.414	1.04533e-91	CD8+ Effector	CCPG1
5.84745e-96	0.47528	0.608	0.479	2.05947e-91	CD8+ Effector	MAML2
8.24731e-96	0.265809	0.781	0.66	2.9047e-91	CD8+ Effector	CAST
1.12923e-95	0.312987	0.721	0.587	3.97715e-91	CD8+ Effector	MPZL1
4.74312e-95	0.260936	0.507	0.369	1.67053e-90	CD8+ Effector	ILRUN
8.4078e-95	0.274354	0.628	0.493	2.96123e-90	CD8+ Effector	C6H5orf56
9.85388e-95	0.251333	0.312	0.198	3.47054e-90	CD8+ Effector	ZBP1
2.65837e-94	0.271801	0.431	0.301	9.36277e-90	CD8+ Effector	SLAMF6
4.35798e-94	0.288015	0.455	0.324	1.53488e-89	CD8+ Effector	WDFY1
9.0109e-94	0.266376	0.411	0.283	3.17364e-89	CD8+ Effector	LOC114679577
1.02032e-93	0.267525	0.673	0.529	3.59355e-89	CD8+ Effector	KAT2B
1.47575e-93	0.368001	0.522	0.395	5.1976e-89	CD8+ Effector	CAPN7
4.48924e-93	0.257517	0.428	0.298	1.58111e-88	CD8+ Effector	TSPAN14
2.54264e-92	0.275564	0.388	0.263	8.95519e-88	CD8+ Effector	ABHD17B
1.33333e-91	0.287551	0.581	0.442	4.696e-87	CD8+ Effector	RPS6KC1
1.31788e-90	0.258276	0.363	0.239	4.64156e-86	CD8+ Effector	CD244
3.49763e-90	0.251419	0.798	0.674	1.23186e-85	CD8+ Effector	TNFRSF1B
4.1305e-90	0.269672	0.818	0.698	1.45476e-85	CD8+ Effector	SRPK2
1.09518e-89	0.274013	0.884	0.806	3.85722e-85	CD8+ Effector	HCST
2.63707e-89	0.289909	0.404	0.284	9.28777e-85	CD8+ Effector	FKBP15
2.72726e-89	0.269299	0.453	0.326	9.60541e-85	CD8+ Effector	VPS13A
1.9655e-88	0.316058	0.316	0.204	6.92248e-84	CD8+ Effector	IL21R
8.53914e-88	0.251912	0.498	0.366	3.00748e-83	CD8+ Effector	SNX14
1.84634e-87	0.303395	0.602	0.474	6.50283e-83	CD8+ Effector	KLHL2
6.56198e-87	0.300965	0.452	0.329	2.31113e-82	CD8+ Effector	RIF1
3.13808e-86	0.306345	0.568	0.433	1.10523e-81	CD8+ Effector	TMTC2
4.26413e-86	0.26893	0.366	0.246	1.50183e-81	CD8+ Effector	VCL
5.02019e-86	0.270927	0.398	0.279	1.76811e-81	CD8+ Effector	BTBD1
6.98352e-85	0.284628	0.755	0.63	2.4596e-80	CD8+ Effector	NFATC3
6.04613e-84	0.288686	0.89	0.794	2.12945e-79	CD8+ Effector	SSH2
4.05281e-83	0.310556	0.504	0.381	1.4274e-78	CD8+ Effector	OSBPL3
2.0949e-82	0.382674	0.576	0.457	7.37824e-78	CD8+ Effector	ZHX2
7.76284e-82	0.307802	0.639	0.511	2.73407e-77	CD8+ Effector	BCAS3
1.918e-81	0.276387	0.51	0.374	6.75519e-77	CD8+ Effector	TPD52
2.78378e-81	0.285325	0.647	0.516	9.80449e-77	CD8+ Effector	SGMS1
2.66806e-80	0.303231	0.43	0.314	9.3969e-76	CD8+ Effector	LOC695047
2.40317e-79	0.253921	0.342	0.234	8.46397e-75	CD8+ Effector	CARD16
1.10668e-78	0.335815	0.715	0.598	3.89774e-74	CD8+ Effector	DLG1
5.01168e-78	0.252643	0.368	0.256	1.76511e-73	CD8+ Effector	PARP15
6.20512e-78	0.254786	0.65	0.523	2.18544e-73	CD8+ Effector	SOS2
4.85449e-77	0.256051	0.616	0.492	1.70975e-72	CD8+ Effector	SLA2
1.11694e-76	0.259959	0.708	0.6	3.93386e-72	CD8+ Effector	AKNA
1.85266e-76	0.389919	0.295	0.194	6.52508e-72	CD8+ Effector	LARGE1
9.88528e-76	0.303234	0.572	0.445	3.48159e-71	CD8+ Effector	MLLT3
9.93266e-76	0.25167	0.427	0.309	3.49828e-71	CD8+ Effector	TENT4B
1.21047e-75	0.261047	0.644	0.521	4.26328e-71	CD8+ Effector	ZNF148
4.30797e-74	0.258529	0.371	0.264	1.51727e-69	CD8+ Effector	RPRD1A
3.74615e-73	0.254913	0.745	0.622	1.31939e-68	CD8+ Effector	LPP
1.38314e-71	0.252793	0.424	0.31	4.8714e-67	CD8+ Effector	TMEM135
2.00897e-71	0.264571	0.658	0.543	7.07559e-67	CD8+ Effector	PTPN2
1.05055e-70	0.257554	0.514	0.397	3.70005e-66	CD8+ Effector	PREP
3.73425e-70	0.260021	0.674	0.558	1.3152e-65	CD8+ Effector	CD63
6.31753e-70	0.622058	0.541	0.427	2.22503e-65	CD8+ Effector	BMT2
9.50393e-69	0.273927	0.462	0.345	3.34728e-64	CD8+ Effector	HIP1
1.97716e-65	0.267561	0.388	0.285	6.96357e-61	CD8+ Effector	DOP1A
1.03416e-64	0.287553	0.484	0.37	3.6423e-60	CD8+ Effector	CDK6
5.83785e-64	0.28552	0.911	0.845	2.05609e-59	CD8+ Effector	FOXN3
2.7537e-59	0.258778	0.577	0.47	9.69853e-55	CD8+ Effector	ATF2
1.04089e-56	0.297732	0.487	0.381	3.66602e-52	CD8+ Effector	CAMKMT
2.67416e-56	0.269296	0.418	0.316	9.41838e-52	CD8+ Effector	SCFD2
3.34167e-56	0.444692	0.296	0.212	1.17693e-51	CD8+ Effector	LOC100499503
6.89352e-56	0.363771	0.775	0.671	2.4279e-51	CD8+ Effector	LOC114669738
1.51457e-53	0.264017	0.356	0.266	5.33432e-49	CD8+ Effector	SHLD2
0	0.754406	0.999	0.998	0	EM	KEG06-r01
0	0.727589	0.902	0.89	0	EM	ANKRD11
7.43735e-280	0.635094	0.95	0.963	2.61944e-275	EM	KEG06-p11
3.79183e-263	0.740734	0.841	0.803	1.33548e-258	EM	ATXN1
5.6084e-243	0.69633	0.921	0.926	1.97528e-238	EM	SH3KBP1
2.85834e-223	0.61087	0.947	0.943	1.00671e-218	EM	EML4
1.55766e-221	0.545888	0.937	0.949	5.48606e-217	EM	KEG06-p13
2.17563e-203	0.512618	0.945	0.951	7.66258e-199	EM	FNBP1
3.19682e-195	0.701437	0.862	0.849	1.12592e-190	EM	CHST11
4.38223e-181	0.710002	0.794	0.772	1.54342e-176	EM	PRKCA
4.57583e-181	0.450292	0.963	0.974	1.61161e-176	EM	MBNL1
1.57539e-177	0.698056	0.782	0.743	5.54851e-173	EM	PTPRJ
1.06095e-176	0.514386	0.914	0.908	3.73667e-172	EM	PRKCH
1.18297e-174	0.907475	0.736	0.66	4.16643e-170	EM	BICDL1
1.55209e-174	0.840705	0.929	0.93	5.46648e-170	EM	SIK3
1.683e-167	0.712961	0.758	0.727	5.92753e-163	EM	RAPGEF1
3.7184e-166	0.480341	0.963	0.955	1.30962e-161	EM	PITPNC1
2.36753e-165	0.488688	0.979	0.989	8.33843e-161	EM	KEG06-p07
6.91195e-162	0.558907	0.855	0.858	2.43439e-157	EM	TNIK
4.31607e-160	0.577994	0.863	0.867	1.52012e-155	EM	PICALM
2.04555e-154	0.457532	0.947	0.95	7.20443e-150	EM	ANKRD44
3.94101e-154	0.536382	0.874	0.88	1.38802e-149	EM	CBLB
3.8989e-151	0.648745	0.776	0.727	1.37319e-146	EM	ARHGAP26
4.24229e-151	0.617512	0.838	0.823	1.49413e-146	EM	FBXW7
8.22215e-151	0.666571	0.759	0.735	2.89584e-146	EM	FOXP1
7.81628e-150	0.637804	0.75	0.737	2.75289e-145	EM	BCL11B
9.48526e-143	0.984099	0.515	0.384	3.34071e-138	EM	BTBD11
6.31578e-132	0.613347	0.734	0.683	2.22442e-127	EM	PDE3B
6.34693e-128	0.949724	0.362	0.244	2.23539e-123	EM	ABHD6
4.57075e-125	0.51596	0.838	0.853	1.60982e-120	EM	ITK
5.99362e-125	0.524728	0.798	0.81	2.11095e-120	EM	WNK1
7.80797e-123	0.696223	0.65	0.587	2.74997e-118	EM	TRPS1
6.34932e-120	0.595803	0.783	0.797	2.23623e-115	EM	CNOT6L
1.76513e-116	0.829785	0.702	0.651	6.21678e-112	EM	CHN2
2.42232e-116	0.643393	0.772	0.784	8.53142e-112	EM	NCOA3
4.44529e-116	0.494887	0.809	0.829	1.56563e-111	EM	SMCHD1
1.75955e-114	0.542428	0.8	0.797	6.19713e-110	EM	DYRK1A
3.11401e-114	0.447907	0.903	0.918	1.09676e-109	EM	AKAP13
9.62759e-113	0.811656	0.586	0.527	3.39084e-108	EM	JARID2
5.59884e-112	0.677275	0.706	0.688	1.97191e-107	EM	MSI2
4.01282e-107	0.624342	0.838	0.852	1.41332e-102	EM	GNG2
2.64832e-105	0.533893	0.734	0.735	9.32739e-101	EM	ITCH
5.01955e-104	0.578808	0.951	0.952	1.76789e-99	EM	LOC708686
4.71402e-103	0.534733	0.795	0.783	1.66028e-98	EM	ELMO1
5.09466e-102	0.704482	0.612	0.562	1.79434e-97	EM	CDC14A
1.48157e-99	0.492077	0.816	0.83	5.2181e-95	EM	FYN
1.26016e-98	0.654522	0.634	0.602	4.43827e-94	EM	HIVEP1
4.38113e-98	0.498734	0.833	0.851	1.54303e-93	EM	PIP4K2A
7.25574e-98	0.583762	0.755	0.752	2.55547e-93	EM	CDK17
4.57558e-97	0.4524	0.798	0.823	1.61152e-92	EM	USP15
7.34379e-97	0.420146	0.934	0.955	2.58648e-92	EM	KEG06-p12
4.58696e-96	0.432152	0.856	0.897	1.61553e-91	EM	CDC42SE2
4.95728e-96	0.496144	0.854	0.873	1.74595e-91	EM	JMJD1C
8.79314e-95	0.660533	0.642	0.61	3.09694e-90	EM	HIVEP2
2.9818e-94	0.509092	0.779	0.798	1.05019e-89	EM	ARID4B
2.33162e-93	0.553255	0.845	0.855	8.21197e-89	EM	FOXN3
1.03981e-92	0.387491	0.888	0.911	3.66219e-88	EM	CELF2
1.37138e-91	0.425534	0.83	0.842	4.82999e-87	EM	VPS13B
2.88306e-90	0.539262	0.643	0.565	1.01541e-85	EM	PAG1
2.98736e-89	0.500068	0.803	0.819	1.05215e-84	EM	KMT2C
3.97602e-89	0.826787	0.41	0.306	1.40035e-84	EM	BACH2
3.11534e-88	0.690808	0.677	0.67	1.09722e-83	EM	SPAG9
1.67327e-87	0.676589	0.623	0.593	5.89327e-83	EM	PPP1R16B
1.75538e-87	0.632366	0.729	0.728	6.18244e-83	EM	KDM6A
2.91366e-83	0.458786	0.787	0.809	1.02619e-78	EM	BIRC6
9.68726e-83	0.679255	0.681	0.681	3.41185e-78	EM	CMIP
8.03175e-82	0.482056	0.92	0.926	2.82878e-77	EM	KEG06-r02
3.12162e-81	0.370028	0.907	0.932	1.09943e-76	EM	LOC707383
1.5757e-80	0.542374	0.872	0.896	5.54962e-76	EM	CD44
5.7138e-80	0.573714	0.625	0.595	2.0124e-75	EM	LYST
5.80967e-80	0.397934	0.843	0.855	2.04617e-75	EM	UTRN
5.3151e-79	0.513657	0.712	0.718	1.87198e-74	EM	SETD2
3.62888e-78	0.609529	0.449	0.36	1.27809e-73	EM	GPRIN3
5.68869e-78	0.612084	0.627	0.615	2.00356e-73	EM	XYLT1
1.08702e-77	0.488807	0.784	0.789	3.8285e-73	EM	INPP5D
2.39226e-77	0.683408	0.591	0.537	8.42553e-73	EM	TGFBR3
2.92353e-77	0.622512	0.311	0.225	1.02967e-72	EM	BCL2L11
7.90951e-77	0.481654	0.812	0.818	2.78573e-72	EM	DNAJC1
8.76263e-75	0.547489	0.764	0.778	3.0862e-70	EM	MGAT5
8.88763e-75	0.363092	0.894	0.912	3.13022e-70	EM	ARHGAP15
1.48988e-74	0.555398	0.795	0.805	5.24736e-70	EM	ARIH1
1.94918e-71	0.383812	0.855	0.9	6.86501e-67	EM	JAK1
1.99135e-71	0.548586	0.849	0.897	7.01353e-67	EM	TGFB1
4.25508e-70	0.423968	0.763	0.771	1.49864e-65	EM	RORA
6.37657e-69	0.468608	0.705	0.722	2.24583e-64	EM	ZNF292
1.18017e-68	0.910985	0.339	0.253	4.15654e-64	EM	PDZRN3
5.98032e-68	0.615642	0.437	0.37	2.10627e-63	EM	LRIG1
1.41819e-67	0.487375	0.751	0.772	4.99485e-63	EM	INPP4A
4.87078e-67	0.467093	0.723	0.734	1.71549e-62	EM	RASA2
2.27161e-66	0.468066	0.712	0.727	8.0006e-62	EM	STK10
4.01829e-65	0.47289	0.729	0.757	1.41524e-60	EM	WAC
4.01741e-64	0.657802	0.391	0.324	1.41493e-59	EM	ELL
3.2644e-63	0.461203	0.762	0.779	1.14972e-58	EM	ZFAND3
1.08763e-61	0.506378	0.677	0.672	3.83062e-57	EM	DENND1B
2.07001e-61	0.514917	0.648	0.65	7.29059e-57	EM	CYTH1
7.36982e-61	0.612562	0.277	0.198	2.59565e-56	EM	LARGE1
9.32623e-61	0.446131	0.746	0.772	3.2847e-56	EM	KAT6A
2.45699e-60	0.413787	0.764	0.801	8.65353e-56	EM	ZC3HAV1
6.16847e-60	0.399848	0.811	0.826	2.17253e-55	EM	STAG1
3.99464e-59	0.434675	0.751	0.772	1.40691e-54	EM	MED13L
2.01505e-58	0.778934	0.733	0.769	7.09701e-54	EM	DENND4A
3.489e-58	0.406885	0.838	0.862	1.22883e-53	EM	PARP8
4.64938e-58	0.416943	0.761	0.787	1.63751e-53	EM	USP34
4.97867e-56	0.424674	0.745	0.768	1.75349e-51	EM	ARID1B
2.62643e-55	0.462105	0.734	0.752	9.25028e-51	EM	SLC38A1
3.04092e-55	0.504828	0.616	0.619	1.07101e-50	EM	PSME4
3.74194e-55	0.591166	0.347	0.273	1.31791e-50	EM	NRIP1
7.3618e-55	0.520208	0.617	0.618	2.59283e-50	EM	UBR5
3.31085e-54	0.437475	0.723	0.751	1.16608e-49	EM	KANSL1
2.58502e-53	0.569619	0.569	0.55	9.10443e-49	EM	SUCO
5.51753e-53	0.350394	0.867	0.872	1.94327e-48	EM	KLF12
6.92219e-53	0.337265	0.913	0.948	2.43799e-48	EM	RAP1B
2.23958e-52	0.446143	0.752	0.793	7.88781e-48	EM	RNF149
2.34443e-52	0.480919	0.708	0.724	8.25707e-48	EM	FNIP1
2.14268e-51	0.439297	0.739	0.766	7.54651e-47	EM	TGFBR2
2.25076e-51	0.402692	0.785	0.833	7.92719e-47	EM	PREX1
3.41097e-51	0.452849	0.427	0.35	1.20134e-46	EM	ICOS
4.21615e-51	0.387938	0.758	0.774	1.48493e-46	EM	LRBA
4.82031e-51	0.399887	0.969	0.983	1.69771e-46	EM	KEG06-p10
6.07826e-51	1.0054	0.442	0.402	2.14076e-46	EM	LOC114673210
2.51392e-49	0.490099	0.639	0.657	8.85402e-45	EM	ATXN7
2.6354e-49	0.415626	0.743	0.771	9.28187e-45	EM	ARAP2
1.56317e-48	0.519908	0.613	0.616	5.5055e-44	EM	FOXO1
4.21283e-48	0.421887	0.671	0.69	1.48376e-43	EM	PRKCQ
3.40353e-47	0.528738	0.479	0.424	1.19872e-42	EM	CD6
3.52945e-47	0.476363	0.774	0.809	1.24307e-42	EM	ESYT2
4.22869e-47	0.515242	0.59	0.551	1.48935e-42	EM	THEMIS
8.25427e-47	0.389151	0.759	0.754	2.90715e-42	EM	CAMK4
1.96429e-46	0.551477	0.621	0.637	6.91823e-42	EM	USP9X
2.21499e-46	0.458318	0.667	0.683	7.80119e-42	EM	UBE2H
5.49014e-46	0.503075	0.331	0.272	1.93363e-41	EM	VPS37B
8.2453e-45	0.639616	0.58	0.561	2.90399e-40	EM	MPP7
9.97429e-45	0.450187	0.655	0.646	3.51294e-40	EM	PDE7A
9.0016e-44	0.430354	0.787	0.834	3.17036e-39	EM	KMT2E
4.69841e-43	0.450363	0.838	0.866	1.65478e-38	EM	KEG06-p08
7.89659e-43	0.526489	0.626	0.627	2.78118e-38	EM	DIP2B
4.69091e-42	0.516058	0.571	0.582	1.65214e-37	EM	BRD4
5.63424e-42	0.46072	0.636	0.632	1.98438e-37	EM	SYTL2
7.03496e-42	0.463283	0.654	0.682	2.47771e-37	EM	PUM1
2.26247e-41	0.324439	0.886	0.911	7.96842e-37	EM	RIPOR2
8.82794e-41	0.499629	0.676	0.701	3.1092e-36	EM	CPD
3.69371e-40	0.421737	0.801	0.831	1.30092e-35	EM	STAT4
3.85198e-39	0.314289	0.883	0.917	1.35667e-34	EM	SKAP1
5.29055e-39	0.442235	0.658	0.689	1.86333e-34	EM	UBAC2
5.37399e-39	0.583682	0.496	0.482	1.89272e-34	EM	ATF2
1.24033e-38	0.511559	0.665	0.701	4.36844e-34	EM	FBXO34
1.88837e-38	0.316579	0.87	0.926	6.65085e-34	EM	CHD2
3.97476e-38	0.446936	0.662	0.687	1.39991e-33	EM	PAN3
2.53816e-37	0.353137	0.746	0.783	8.93939e-33	EM	PRKCB
3.59001e-37	0.445888	0.593	0.607	1.2644e-32	EM	MARK3
5.94986e-37	0.367346	0.754	0.799	2.09554e-32	EM	NIPBL
7.73076e-37	0.427742	0.584	0.599	2.72277e-32	EM	OGA
4.17512e-36	0.423873	0.743	0.788	1.47048e-31	EM	HERC1
1.04506e-34	0.377901	0.718	0.765	3.68071e-30	EM	SEMA4D
1.47959e-34	0.589287	0.262	0.211	5.21111e-30	EM	LOC106995245
3.33461e-34	0.415499	0.613	0.631	1.17445e-29	EM	COP1
7.64269e-34	0.353127	0.783	0.829	2.69175e-29	EM	TNRC6B
4.3304e-33	0.486422	0.575	0.59	1.52517e-28	EM	SMG6
2.35778e-32	0.422248	0.651	0.682	8.3041e-28	EM	MKLN1
3.5334e-32	0.473401	0.389	0.339	1.24446e-27	EM	EZH2
5.7952e-32	0.419434	0.69	0.745	2.04107e-27	EM	PAFAH1B1
8.12907e-32	0.426691	0.661	0.689	2.86306e-27	EM	TBL1XR1
8.48715e-32	0.407581	0.633	0.664	2.98918e-27	EM	CREBBP
2.1806e-31	0.481539	0.618	0.655	7.68008e-27	EM	NUP98
4.06688e-31	0.547806	0.416	0.39	1.43235e-26	EM	TULP4
6.67295e-31	0.393973	0.67	0.714	2.35021e-26	EM	GNA13
1.6487e-30	0.379336	0.644	0.674	5.80671e-26	EM	GSK3B
2.49687e-30	0.463688	0.579	0.597	8.79397e-26	EM	ATP10A
4.87501e-30	0.397007	0.655	0.693	1.71698e-25	EM	AAK1
5.00689e-30	0.391244	0.694	0.726	1.76343e-25	EM	ASH1L
2.81372e-29	0.313321	0.746	0.794	9.90993e-25	EM	PPP2R5C
4.41211e-29	0.518153	0.429	0.404	1.55395e-24	EM	GALNT3
4.66972e-29	0.439166	0.586	0.608	1.64467e-24	EM	BAZ1A
8.86211e-29	0.439211	0.741	0.781	3.12124e-24	EM	OSBPL8
3.48079e-28	0.420128	0.671	0.725	1.22593e-23	EM	CAB39
6.05144e-28	0.689327	0.414	0.388	2.13132e-23	EM	ADORA2B
7.93811e-28	0.426904	0.584	0.611	2.7958e-23	EM	SMG1
1.02533e-27	0.366747	0.664	0.715	3.61121e-23	EM	ATRX
3.48215e-27	0.497657	0.476	0.465	1.22641e-22	EM	SMAD3
7.25259e-27	0.463963	0.664	0.71	2.55436e-22	EM	CDK13
7.81675e-27	0.374809	0.617	0.658	2.75306e-22	EM	ITGAL
3.30129e-26	0.36712	0.774	0.811	1.16271e-21	EM	SSH2
5.42385e-26	0.480847	0.525	0.53	1.91028e-21	EM	FBXO33
1.3184e-25	0.366932	0.624	0.652	4.64339e-21	EM	RICTOR
3.37344e-25	0.524437	0.441	0.429	1.18813e-20	EM	TBL1X
4.35116e-25	0.443232	0.53	0.545	1.53248e-20	EM	N4BP1
8.05722e-25	0.390563	0.611	0.646	2.83775e-20	EM	USP47
8.57576e-25	0.459995	0.389	0.362	3.02038e-20	EM	TET2
1.16055e-24	0.408297	0.624	0.655	4.08745e-20	EM	EIF4G3
1.20529e-24	0.430245	0.504	0.511	4.24503e-20	EM	SPPL2A
1.22127e-24	0.550232	0.489	0.494	4.30131e-20	EM	STAT5B
1.65076e-24	1.04361	0.982	0.995	5.81397e-20	EM	LOC114674534
2.19458e-24	0.39948	0.649	0.693	7.72932e-20	EM	PTPN1
4.91521e-24	0.421434	0.567	0.59	1.73114e-19	EM	UBR1
9.78832e-24	0.374455	0.626	0.673	3.44745e-19	EM	CSNK1A1
1.41384e-23	0.439912	0.476	0.466	4.97953e-19	EM	CARD11
1.6757e-23	0.31482	0.729	0.784	5.90183e-19	EM	MYCBP2
4.73347e-23	0.453178	0.568	0.586	1.66713e-18	EM	RHOH
7.03902e-23	0.455598	0.541	0.554	2.47914e-18	EM	GLCCI1
9.43917e-23	0.511808	0.573	0.603	3.32448e-18	EM	LOC106999943
1.22781e-22	0.348595	0.645	0.694	4.32433e-18	EM	NCOR1
1.63104e-22	0.512756	0.503	0.508	5.74453e-18	EM	ATP8A1
1.83775e-22	0.413422	0.623	0.655	6.47257e-18	EM	ARL15
2.28993e-22	0.731561	0.287	0.252	8.06512e-18	EM	LOC114673461
2.90317e-22	0.493357	0.446	0.427	1.0225e-17	EM	ZEB1
2.96207e-22	0.304701	0.767	0.835	1.04324e-17	EM	PRRC2C
3.13051e-22	0.478545	0.539	0.562	1.10257e-17	EM	GATAD2B
3.49536e-22	0.400848	0.664	0.72	1.23106e-17	EM	ZFAND6
6.13492e-22	0.446473	0.579	0.617	2.16072e-17	EM	RAB7A
6.31635e-22	0.424681	0.549	0.562	2.22462e-17	EM	TMEM131L
1.02385e-21	0.349193	0.683	0.718	3.606e-17	EM	COG5
2.05777e-21	0.396668	0.633	0.672	7.24748e-17	EM	PPP3CC
2.35643e-21	0.403801	0.671	0.738	8.29933e-17	EM	EVL
3.02396e-21	0.340349	0.701	0.741	1.06504e-16	EM	NCOA2
3.4956e-21	0.602104	0.39	0.383	1.23115e-16	EM	SKI
5.75916e-21	0.408477	0.44	0.436	2.02838e-16	EM	GPR107
9.51546e-21	0.4177	0.612	0.66	3.35134e-16	EM	LOC694823
9.62728e-21	0.464111	0.361	0.331	3.39073e-16	EM	HNRNPLL
1.38576e-20	0.353978	0.61	0.657	4.88066e-16	EM	RNF213
2.12057e-20	0.415577	0.492	0.497	7.46864e-16	EM	ESCO1
3.08209e-20	0.39681	0.274	0.238	1.08551e-15	EM	ZC3H12D
3.17812e-20	0.44281	0.502	0.513	1.11934e-15	EM	SLMAP
3.25267e-20	0.452417	0.56	0.594	1.14559e-15	EM	CNOT2
3.77607e-20	0.398502	0.546	0.564	1.32993e-15	EM	NLRC5
1.08242e-19	0.322442	0.689	0.74	3.81228e-15	EM	ROCK1
1.38323e-19	0.422808	0.538	0.544	4.87173e-15	EM	MAP3K5
1.70779e-19	0.466265	0.373	0.349	6.01483e-15	EM	ANKRD28
2.50656e-19	0.437443	0.407	0.397	8.82811e-15	EM	ARNTL
2.51965e-19	0.643067	0.5	0.504	8.8742e-15	EM	NFKB1
2.74079e-19	0.411137	0.612	0.645	9.65306e-15	EM	ZNF609
2.85092e-19	0.482872	0.499	0.5	1.00409e-14	EM	GRK5
3.20652e-19	0.4241	0.491	0.502	1.12934e-14	EM	LRCH3
3.90513e-19	0.363351	0.674	0.724	1.37539e-14	EM	PIAS1
4.96601e-19	0.457447	0.655	0.683	1.74903e-14	EM	ABLIM1
5.25643e-19	0.452835	0.51	0.519	1.85131e-14	EM	MAN1A2
6.49042e-19	0.520356	0.406	0.382	2.28593e-14	EM	EXT1
7.26364e-19	0.342899	0.696	0.761	2.55825e-14	EM	EPC1
7.92964e-19	0.504594	0.483	0.477	2.79282e-14	EM	NEDD4L
8.67342e-19	0.397338	0.634	0.67	3.05478e-14	EM	ARHGEF3
9.51417e-19	0.459986	0.57	0.604	3.35089e-14	EM	ASAP1
2.36528e-18	0.425068	0.527	0.545	8.33053e-14	EM	LOC712543
3.84634e-18	0.391738	0.622	0.671	1.35468e-13	EM	OSBPL9
4.05382e-18	0.400007	0.621	0.666	1.42775e-13	EM	MAPK1
6.34722e-18	0.386969	0.525	0.538	2.23549e-13	EM	PHF21A
1.94999e-17	0.399647	0.519	0.54	6.86787e-13	EM	SEPTIN6
1.99914e-17	0.509037	0.367	0.356	7.04098e-13	EM	TRAF3
2.11545e-17	0.37639	0.617	0.667	7.45062e-13	EM	ELOVL5
2.11747e-17	0.378971	0.6	0.644	7.45773e-13	EM	SCAF8
2.43269e-17	0.37112	0.654	0.7	8.56793e-13	EM	GOLGA4
4.78175e-17	0.337946	0.646	0.697	1.68413e-12	EM	ATF7IP
7.54363e-17	0.384785	0.586	0.617	2.65687e-12	EM	LCOR
7.71919e-17	0.38984	0.614	0.651	2.7187e-12	EM	ARID2
1.09506e-16	0.421816	0.58	0.62	3.85681e-12	EM	ST3GAL1
1.20899e-16	0.269443	0.698	0.776	4.25807e-12	EM	MYH9
1.49596e-16	0.387806	0.503	0.528	5.26876e-12	EM	OGT
1.81758e-16	0.454028	0.419	0.424	6.40151e-12	EM	AMBRA1
1.89695e-16	0.438644	0.439	0.448	6.68104e-12	EM	ZRANB1
2.14201e-16	0.361724	0.719	0.774	7.54417e-12	EM	RUNX1
3.7624e-16	0.412866	0.511	0.531	1.32512e-11	EM	NFATC2
4.58231e-16	0.33404	0.645	0.678	1.61389e-11	EM	STK39
6.57742e-16	0.37716	0.612	0.665	2.31657e-11	EM	TRAPPC10
7.43491e-16	0.449789	0.483	0.503	2.61858e-11	EM	RB1CC1
9.2995e-16	0.351815	0.773	0.827	3.27528e-11	EM	ADGRE5
9.54113e-16	0.350712	0.597	0.638	3.36039e-11	EM	PSPC1
1.17049e-15	0.427367	0.569	0.604	4.12248e-11	EM	MAP4K4
1.19407e-15	0.433486	0.488	0.511	4.20553e-11	EM	LPIN1
1.45144e-15	0.352057	0.586	0.628	5.11197e-11	EM	ABI1
1.7519e-15	0.408259	0.472	0.49	6.17018e-11	EM	TBC1D1
1.93257e-15	0.443142	0.361	0.348	6.80652e-11	EM	TXNDC11
2.04282e-15	0.332032	0.633	0.729	7.19482e-11	EM	LAPTM5
2.37545e-15	0.380067	0.268	0.241	8.36634e-11	EM	SEPTIN9
3.12361e-15	0.438297	0.57	0.604	1.10013e-10	EM	BRAF
3.7378e-15	0.334671	0.693	0.735	1.31645e-10	EM	PIK3R5
8.85369e-15	0.423547	0.492	0.506	3.11827e-10	EM	FUT8
8.94588e-15	0.359946	0.618	0.67	3.15074e-10	EM	CUL3
8.94982e-15	0.448289	0.529	0.553	3.15213e-10	EM	CEMIP2
1.27168e-14	0.404657	0.472	0.49	4.47884e-10	EM	MADD
1.48062e-14	0.413552	0.523	0.554	5.21474e-10	EM	TMEM181
1.92989e-14	0.395377	0.541	0.577	6.79706e-10	EM	CNOT4
2.25387e-14	0.369252	0.577	0.612	7.93814e-10	EM	USP3
2.50497e-14	0.383286	0.559	0.598	8.82249e-10	EM	CSGALNACT2
4.28487e-14	0.365948	0.582	0.632	1.50913e-09	EM	PPP6R3
5.40656e-14	0.443199	0.658	0.716	1.90419e-09	EM	RFX3
6.73316e-14	0.314365	0.681	0.725	2.37142e-09	EM	SOS1
8.14667e-14	0.394801	0.398	0.398	2.86926e-09	EM	MEF2D
1.01163e-13	0.398591	0.482	0.494	3.56296e-09	EM	FAM214A
1.43764e-13	0.332027	0.652	0.705	5.06338e-09	EM	TOP1
1.63851e-13	0.306128	0.658	0.687	5.77083e-09	EM	LRRC8C
3.43991e-13	0.44229	0.43	0.441	1.21154e-08	EM	GBF1
3.46362e-13	0.327168	0.698	0.753	1.21989e-08	EM	PTPN22
4.79696e-13	0.40955	0.476	0.487	1.68949e-08	EM	ITPKB
5.05653e-13	0.375327	0.589	0.643	1.78091e-08	EM	CELF1
8.52139e-13	0.306118	0.621	0.667	3.00123e-08	EM	PUM2
1.69435e-12	0.346242	0.44	0.439	5.96749e-08	EM	PELI1
1.75529e-12	0.398386	0.496	0.53	6.18213e-08	EM	RNF4
2.27961e-12	0.438943	0.574	0.612	8.0288e-08	EM	FBXO11
2.42761e-12	0.373928	0.474	0.478	8.55005e-08	EM	GRAP2
2.69618e-12	0.33987	0.582	0.617	9.49596e-08	EM	DLG1
2.94234e-12	0.464026	0.311	0.299	1.03629e-07	EM	RELB
3.87402e-12	0.384721	0.522	0.55	1.36443e-07	EM	PCNX1
5.0954e-12	0.383625	0.592	0.634	1.7946e-07	EM	RPS6KA3
5.52754e-12	0.370088	0.6	0.653	1.9468e-07	EM	GNB1
6.94463e-12	0.342393	0.586	0.645	2.4459e-07	EM	PRRC2B
1.13085e-11	0.47935	0.416	0.424	3.98286e-07	EM	FNDC3B
1.19555e-11	0.406199	0.48	0.498	4.21073e-07	EM	ZNF407
1.44963e-11	0.455851	0.552	0.594	5.10558e-07	EM	ATP2B1
1.80045e-11	0.387177	0.531	0.573	6.34119e-07	EM	ACTN4
2.90099e-11	0.314006	0.643	0.702	1.02173e-06	EM	KDM2A
2.99051e-11	0.319682	0.642	0.699	1.05326e-06	EM	ITSN2
4.56536e-11	0.355993	0.454	0.479	1.60792e-06	EM	FGD3
5.07367e-11	0.382665	0.336	0.324	1.78694e-06	EM	CDYL2
5.30407e-11	0.311813	0.766	0.841	1.86809e-06	EM	EZR
6.22239e-11	0.352689	0.665	0.711	2.19152e-06	EM	SLCO3A1
6.38664e-11	0.405717	0.371	0.378	2.24937e-06	EM	USP48
6.62729e-11	0.304551	0.255	0.236	2.33413e-06	EM	PLCG1
7.25534e-11	0.397723	0.417	0.432	2.55533e-06	EM	INO80D
7.61954e-11	0.440458	0.373	0.352	2.6836e-06	EM	GZMA
9.09698e-11	0.287652	0.817	0.881	3.20396e-06	EM	ANKRD12
9.33378e-11	0.379123	0.433	0.447	3.28736e-06	EM	NCK2
1.00029e-10	0.337731	0.584	0.641	3.52302e-06	EM	LOC698045
1.21222e-10	0.364882	0.751	0.771	4.26944e-06	EM	KEG06-p04
1.47995e-10	0.369526	0.385	0.383	5.21239e-06	EM	IRAK2
1.48141e-10	0.34474	0.587	0.633	5.21752e-06	EM	ZNF644
1.50349e-10	0.321919	0.602	0.656	5.29528e-06	EM	CCDC88C
2.66687e-10	0.856168	0.44	0.442	9.39271e-06	EM	BMT2
2.95128e-10	0.365589	0.564	0.621	1.03944e-05	EM	AKNA
3.13182e-10	0.34456	0.573	0.621	1.10303e-05	EM	KDM4C
3.56384e-10	0.658295	0.481	0.512	1.25518e-05	EM	GAS7
4.10921e-10	0.379855	0.771	0.844	1.44727e-05	EM	NR3C1
4.2648e-10	0.381044	0.5	0.535	1.50206e-05	EM	PPP2R2A
4.6283e-10	0.306961	0.773	0.835	1.63009e-05	EM	SCML4
4.94893e-10	0.437871	0.435	0.458	1.74301e-05	EM	SUSD6
5.22514e-10	0.506688	0.323	0.313	1.84029e-05	EM	TSPAN5
6.32623e-10	0.324628	0.538	0.583	2.2281e-05	EM	EP300
6.4152e-10	0.283149	0.806	0.866	2.25943e-05	EM	SYTL3
6.62146e-10	0.26583	0.713	0.763	2.33208e-05	EM	PPP3CA
7.28519e-10	0.369163	0.316	0.297	2.56584e-05	EM	GRAMD1B
7.70303e-10	0.382704	0.541	0.569	2.71301e-05	EM	ERN1
7.88791e-10	0.455714	0.398	0.416	2.77812e-05	EM	AGO2
8.17017e-10	0.398183	0.427	0.437	2.87753e-05	EM	BMP2K
8.18614e-10	0.33979	0.588	0.642	2.88316e-05	EM	MTREX
1.10658e-09	0.423301	0.371	0.376	3.89738e-05	EM	SLC23A2
1.60604e-09	0.324059	0.636	0.689	5.65647e-05	EM	PTPRA
1.76781e-09	0.346391	0.575	0.617	6.22624e-05	EM	RAPGEF6
1.93872e-09	0.338905	0.511	0.545	6.82819e-05	EM	MYO5A
2.00615e-09	0.397658	0.566	0.622	7.06566e-05	EM	LOC713490
2.32878e-09	0.394772	0.45	0.478	8.20196e-05	EM	SAMHD1
2.36192e-09	0.359046	0.436	0.449	8.31869e-05	EM	MAN2A1
2.56983e-09	0.39843	0.31	0.299	9.05095e-05	EM	VPS54
2.73928e-09	0.271949	0.641	0.739	9.64775e-05	EM	LCK
2.81885e-09	0.380742	0.571	0.614	9.92799e-05	EM	GTDC1
3.36397e-09	0.353539	0.518	0.562	0.000118479	EM	RBM33
3.65157e-09	0.386943	0.523	0.555	0.000128608	EM	TC2N
3.77732e-09	0.354868	0.478	0.504	0.000133037	EM	ABR
3.84263e-09	0.332592	0.565	0.61	0.000135338	EM	PKN2
3.97121e-09	0.411358	0.446	0.468	0.000139866	EM	FBXL20
4.04272e-09	0.315729	0.536	0.583	0.000142385	EM	HELZ
4.73722e-09	0.422829	0.524	0.563	0.000166845	EM	RRAS2
5.20928e-09	0.394214	0.448	0.478	0.000183471	EM	PCED1B
5.28142e-09	0.318844	0.613	0.658	0.000186012	EM	VTI1A
5.72962e-09	0.406059	0.342	0.341	0.000201797	EM	ARHGEF18
7.34645e-09	0.338548	0.583	0.644	0.000258742	EM	TM9SF3
9.09758e-09	0.342305	0.666	0.738	0.000320417	EM	RAB8B
1.0077e-08	0.333359	0.507	0.534	0.000354913	EM	REV3L
1.42429e-08	0.341818	0.527	0.569	0.000501636	EM	RAB1A
1.67559e-08	0.356136	0.288	0.277	0.000590144	EM	ABHD17B
1.75378e-08	0.363211	0.464	0.495	0.000617682	EM	PPM1B
1.79118e-08	0.416408	0.434	0.465	0.000630854	EM	STAU1
1.84518e-08	0.318198	0.492	0.525	0.000649874	EM	WDR26
2.32482e-08	0.397824	0.361	0.369	0.0008188	EM	SSBP3
2.62749e-08	0.369599	0.594	0.645	0.000925402	EM	RERE
2.62877e-08	0.324124	0.575	0.634	0.000925853	EM	EPB41
3.46261e-08	0.357546	0.433	0.451	0.00121953	EM	RANBP9
4.20794e-08	0.387623	0.436	0.453	0.00148204	EM	LRMP
5.71972e-08	0.47268	0.422	0.441	0.00201449	EM	MAPK8
5.7511e-08	0.417408	0.374	0.391	0.00202554	EM	NCOR2
6.09089e-08	0.479248	0.328	0.33	0.00214521	EM	DOCK9
6.81696e-08	0.342599	0.537	0.584	0.00240093	EM	TRPM7
7.31987e-08	0.452899	0.262	0.253	0.00257806	EM	STAT5A
7.67355e-08	0.385512	0.352	0.359	0.00270263	EM	C18H18orf25
7.77348e-08	0.475524	0.521	0.545	0.00273782	EM	FAM129A
9.52716e-08	0.343391	0.432	0.461	0.00335546	EM	MARK2
9.74116e-08	0.347977	0.333	0.332	0.00343084	EM	ARHGAP9
1.07534e-07	0.343221	0.656	0.721	0.00378735	EM	SRPK2
1.20906e-07	0.354632	0.608	0.655	0.00425832	EM	TTC39C
1.25573e-07	0.3628	0.44	0.466	0.00442269	EM	FAM193A
1.35832e-07	0.382039	0.399	0.417	0.00478402	EM	SS18
1.74167e-07	0.270065	0.673	0.741	0.00613416	EM	NEDD9
1.99961e-07	0.330642	0.589	0.654	0.00704261	EM	NFATC3
2.76769e-07	0.390974	0.394	0.416	0.00974779	EM	UBR4
3.21757e-07	0.343582	0.531	0.562	0.0113323	EM	AFF1
3.25996e-07	0.362072	0.504	0.551	0.0114816	EM	RLF
4.03312e-07	0.345734	0.553	0.606	0.0142046	EM	TNRC6A
4.23068e-07	0.367877	0.37	0.382	0.0149005	EM	MED27
5.55974e-07	0.33799	0.352	0.355	0.0195814	EM	DUSP10
5.78598e-07	0.374917	0.382	0.4	0.0203782	EM	VAV1
6.82222e-07	0.398786	0.325	0.329	0.0240279	EM	LOC695047
7.0333e-07	0.41507	0.403	0.421	0.0247713	EM	KIF1B
8.17183e-07	0.349462	0.496	0.53	0.0287812	EM	USP25
8.82915e-07	0.274735	0.707	0.779	0.0310963	EM	SCAPER
9.0539e-07	0.403446	0.464	0.497	0.0318878	EM	SPPL3
9.54181e-07	0.365027	0.408	0.435	0.0336063	EM	ARIH2
1.06349e-06	0.309803	0.476	0.516	0.0374562	EM	RBM5
1.09297e-06	0.33964	0.408	0.43	0.0384943	EM	AP1G1
1.26601e-06	0.351633	0.502	0.549	0.0445889	EM	FOXJ3
1.42711e-06	0.271629	0.713	0.787	0.050263	EM	IQGAP2
1.81623e-06	0.281721	0.653	0.737	0.0639675	EM	GPBP1
1.92828e-06	0.315055	0.274	0.271	0.0679141	EM	PHF12
2.26001e-06	0.43061	0.43	0.462	0.0795977	EM	USP36
2.44106e-06	0.371449	0.357	0.368	0.085974	EM	MSL2
2.54685e-06	0.298764	0.558	0.614	0.0896999	EM	SPATA13
2.55334e-06	0.349991	0.318	0.319	0.0899285	EM	PEX14
2.78918e-06	0.326063	0.44	0.463	0.0982349	EM	LMBRD1
2.79089e-06	0.289296	0.493	0.536	0.098295	EM	PPP4R3A
3.06173e-06	0.370507	0.376	0.393	0.107834	EM	USP12
3.14395e-06	0.31894	0.555	0.608	0.11073	EM	TMEM131
4.53395e-06	0.326833	0.349	0.357	0.159686	EM	MTMR10
5.94959e-06	0.38542	0.252	0.241	0.209545	EM	RBPMS
7.53518e-06	0.347037	0.415	0.44	0.265389	EM	RMND5A
7.61368e-06	0.35535	0.49	0.532	0.268154	EM	RPRD2
7.87074e-06	0.446224	0.432	0.451	0.277207	EM	RUNX2
7.98372e-06	0.364958	0.43	0.464	0.281187	EM	MAPKAPK2
8.23385e-06	0.315715	0.565	0.618	0.289996	EM	SLC4A7
1.1634e-05	0.28082	0.596	0.669	0.409749	EM	CLEC2D
1.20797e-05	0.362225	0.566	0.634	0.425446	EM	PHF20
1.243e-05	0.356614	0.448	0.477	0.437786	EM	TRAPPC9
1.28019e-05	0.379889	0.58	0.637	0.450883	EM	BTBD9
1.50107e-05	0.339864	0.616	0.675	0.528675	EM	TOX
1.56279e-05	0.321918	0.593	0.658	0.550416	EM	NFAT5
1.5863e-05	0.385151	0.33	0.342	0.558694	EM	ARHGAP17
1.94756e-05	0.257626	0.71	0.8	0.685932	EM	HNRNPC
1.99934e-05	0.325386	0.56	0.628	0.704168	EM	2024-03-06
2.1539e-05	0.297079	0.519	0.57	0.758602	EM	SREK1
2.25272e-05	0.324557	0.443	0.477	0.793407	EM	MED13
2.75625e-05	0.289606	0.612	0.682	0.97075	EM	ITGA4
3.30981e-05	0.395136	0.388	0.414	1	EM	RCOR1
3.32276e-05	0.344936	0.449	0.475	1	EM	ZHX2
5.14739e-05	0.411429	0.378	0.406	1	EM	QRICH1
5.34605e-05	0.251755	0.706	0.769	1	EM	TBC1D5
6.27957e-05	0.308721	0.472	0.518	1	EM	C20H16orf72
7.52405e-05	0.291366	0.581	0.637	1	EM	EXOC4
0.00010961	0.333927	0.286	0.291	1	EM	GSE1
0.000123093	0.328594	0.517	0.581	1	EM	WDR33
0.000129901	0.343209	0.393	0.415	1	EM	PREP
0.000130747	0.333238	0.392	0.412	1	EM	HECTD4
0.000131329	0.392374	0.457	0.494	1	EM	KLHL24
0.000137897	0.314827	0.391	0.414	1	EM	UXS1
0.000138078	0.344674	0.333	0.342	1	EM	SLFN12L
0.000140416	0.364294	0.51	0.565	1	EM	GATAD2A
0.000156487	0.322094	0.396	0.419	1	EM	SLC12A6
0.000166938	0.325948	0.516	0.563	1	EM	XPR1
0.000177042	0.316141	0.511	0.56	1	EM	IKZF3
0.000178208	0.39821	0.352	0.363	1	EM	ELL2
0.000179278	0.319987	0.388	0.412	1	EM	GIT2
0.000213928	0.273829	0.551	0.611	1	EM	MPZL1
0.000230254	0.282178	0.581	0.645	1	EM	REL
0.000236274	0.329619	0.532	0.59	1	EM	LOC701819
0.000243361	0.286959	0.555	0.616	1	EM	ERBIN
0.000248096	0.309267	0.536	0.591	1	EM	CEP85L
0.000256316	0.272937	0.417	0.447	1	EM	LOC707555
0.000266396	0.349138	0.467	0.513	1	EM	SLA2
0.000297239	0.323751	0.408	0.438	1	EM	VPS13D
0.000297534	0.320499	0.419	0.454	1	EM	CNST
0.000364479	0.371751	0.487	0.542	1	EM	PLEKHA2
0.000368712	0.388203	0.423	0.456	1	EM	SIPA1L1
0.000374753	0.304274	0.422	0.442	1	EM	PDE4D
0.000392723	0.348457	0.386	0.403	1	EM	MBTD1
0.000418605	0.345626	0.42	0.458	1	EM	BTAF1
0.000442103	0.259449	0.555	0.614	1	EM	SNRK
0.000496081	0.327057	0.44	0.48	1	EM	RAP1GDS1
0.00052995	0.360249	0.459	0.493	1	EM	LOC114671808
0.000600358	0.25352	0.533	0.569	1	EM	PDE4B
0.000641747	0.329743	0.401	0.436	1	EM	RPS6KB1
0.000761335	0.317951	0.351	0.37	1	EM	MLXIP
0.000828825	0.370161	0.339	0.361	1	EM	MOB3A
0.000830497	0.274023	0.495	0.528	1	EM	SLC2A3
0.000928539	0.285938	0.486	0.529	1	EM	WDR7
0.00114755	0.385978	0.447	0.47	1	EM	RAP1GAP2
0.00119841	0.275376	0.686	0.767	1	EM	DDX3X
0.00125595	0.326258	0.484	0.527	1	EM	COL4A3BP
0.00148114	0.346157	0.379	0.4	1	EM	RFX7
0.00161364	0.295556	0.471	0.526	1	EM	CTNNB1
0.00169086	0.354337	0.399	0.435	1	EM	ATP2A2
0.0019533	0.337724	0.441	0.483	1	EM	MTMR12
0.00217444	0.323082	0.399	0.435	1	EM	DNM2
0.00221701	0.276012	0.265	0.268	1	EM	P2RY8
0.00232564	0.288474	0.43	0.472	1	EM	TRIM33
0.00233811	0.331998	0.351	0.419	1	EM	CAPN7
0.00240876	0.324272	0.309	0.328	1	EM	FAM168B
0.00244597	0.323563	0.332	0.347	1	EM	VOPP1
0.00258	0.28546	0.27	0.272	1	EM	E2F3
0.00275707	0.33401	0.47	0.523	1	EM	NUP153
0.00276188	0.27231	0.588	0.652	1	EM	NEK7
0.00303475	0.269565	0.288	0.296	1	EM	DDHD1
0.00311372	0.333711	0.353	0.376	1	EM	ZZEF1
0.00329434	0.294674	0.59	0.657	1	EM	KAT6B
0.00331719	0.320366	0.27	0.277	1	EM	NBEAL1
0.00350895	0.250867	0.523	0.565	1	EM	KEG06-p06
0.00353726	0.39345	0.385	0.42	1	EM	TXLNG
0.00355721	0.309936	0.389	0.414	1	EM	ATP2C1
0.00357656	0.307025	0.444	0.487	1	EM	GLG1
0.00358324	0.301462	0.42	0.45	1	EM	PIK3AP1
0.00421479	0.317162	0.481	0.541	1	EM	2024-03-07
0.00468161	0.323118	0.326	0.343	1	EM	ABCC1
0.00476607	0.378317	0.339	0.36	1	EM	RNF19B
0.00560222	0.266068	0.435	0.481	1	EM	EWSR1
0.00622983	0.261077	0.589	0.661	1	EM	DOCK11
0.00647073	0.256868	0.252	0.258	1	EM	ATG16L1
0.00822835	0.316077	0.421	0.464	1	EM	CNOT1
0.0090872	0.293646	0.322	0.342	1	EM	HDAC4
0.0093103	0.285987	0.534	0.6	1	EM	TUT4
0.00938939	0.277798	0.499	0.548	1	EM	TLK1
0	1.95224	0.615	0.045	0	γδ T cells	ZBTB16
0	1.717	0.569	0.205	0	γδ T cells	LOC720538
0	1.66099	0.486	0.106	0	γδ T cells	LOC711031
0	1.51722	0.655	0.176	0	γδ T cells	SPOCK2
0	1.45037	0.897	0.382	0	γδ T cells	IL7R
0	1.425	0.627	0.222	0	γδ T cells	GPR183
0	1.38938	0.897	0.627	0	γδ T cells	TNFAIP3
0	1.31258	0.834	0.405	0	γδ T cells	RUNX2
0	1.288	0.661	0.325	0	γδ T cells	KLRB1
0	1.25021	0.418	0.016	0	γδ T cells	IL23R
0	1.24879	0.952	0.75	0	γδ T cells	RORA
0	1.23062	0.258	0.01	0	γδ T cells	TMEM132C
0	1.19912	0.832	0.58	0	γδ T cells	G3BP2
0	1.18159	0.628	0.222	0	γδ T cells	PDZRN3
0	1.17656	0.348	0.073	0	γδ T cells	TMEM117
0	1.15213	0.584	0.213	0	γδ T cells	MFHAS1
0	1.15014	0.486	0.155	0	γδ T cells	DOCK3
0	1.14411	0.446	0.031	0	γδ T cells	CCR6
0	1.12874	0.382	0.062	0	γδ T cells	PELI2
0	1.12293	0.701	0.336	0	γδ T cells	SATB1
0	1.11305	0.27	0.06	0	γδ T cells	CDKL2
0	1.07946	0.339	0.064	0	γδ T cells	MAST4
0	1.07062	0.865	0.435	0	γδ T cells	LTB
0	1.06016	0.792	0.533	0	γδ T cells	NFKBIA
0	1.05248	0.389	0.099	0	γδ T cells	MED12L
0	1.048	0.891	0.797	0	γδ T cells	CD69
0	1.03778	0.57	0.269	0	γδ T cells	GRAMD1B
0	1.03711	0.85	0.533	0	γδ T cells	PDE4B
0	0.976411	0.825	0.537	0	γδ T cells	ERN1
0	0.972081	0.399	0.072	0	γδ T cells	IL18RAP
0	0.960642	0.645	0.354	0	γδ T cells	IRAK2
0	0.949296	0.69	0.381	0	γδ T cells	CRY1
0	0.945086	0.375	0.073	0	γδ T cells	PAK3
0	0.944829	0.826	0.607	0	γδ T cells	FOS
0	0.934037	0.344	0.115	0	γδ T cells	NCALD
0	0.929981	0.536	0.197	0	γδ T cells	KLRG1
0	0.92088	0.474	0.202	0	γδ T cells	NR3C2
0	0.896088	0.605	0.227	0	γδ T cells	CYB5A
0	0.895623	0.861	0.631	0	γδ T cells	DUSP1
0	0.889141	0.521	0.236	0	γδ T cells	KDM6B
0	0.884548	0.549	0.271	0	γδ T cells	SNX25
0	0.871852	0.818	0.636	0	γδ T cells	IER2
0	0.859134	0.266	0.033	0	γδ T cells	P2RY14
0	0.852284	0.872	0.665	0	γδ T cells	FOSB
0	0.84891	0.944	0.814	0	γδ T cells	STAT4
0	0.848596	0.869	0.624	0	γδ T cells	TTC39C
0	0.843477	0.313	0.051	0	γδ T cells	KIAA1217
0	0.832529	0.916	0.749	0	γδ T cells	FAM107B
0	0.830043	0.27	0.075	0	γδ T cells	NCAM1
0	0.829261	0.43	0.152	0	γδ T cells	ADAM12
0	0.800576	0.5	0.221	0	γδ T cells	GPR65
0	0.792675	0.529	0.247	0	γδ T cells	DPP4
0	0.769969	0.44	0.175	0	γδ T cells	PLXNC1
0	0.758516	0.886	0.698	0	γδ T cells	RPS15A
0	0.747501	0.679	0.368	0	γδ T cells	BTBD11
0	0.737639	0.35	0.076	0	γδ T cells	JAML
0	0.726087	0.976	0.924	0	γδ T cells	RPLP1
0	0.725241	0.29	0.03	0	γδ T cells	LOC100427702
0	0.723922	0.407	0.173	0	γδ T cells	CCDC50
0	0.699242	0.651	0.341	0	γδ T cells	AKT3
0	0.682498	0.378	0.116	0	γδ T cells	ANKRD6
0	0.668605	0.829	0.545	0	γδ T cells	PAG1
0	0.662474	0.971	0.928	0	γδ T cells	TPT1
0	0.657621	0.897	0.714	0	γδ T cells	ARHGAP26
0	0.650443	0.355	0.147	0	γδ T cells	LST1
0	0.619258	0.888	0.726	0	γδ T cells	CCNL1
0	0.569962	0.959	0.903	0	γδ T cells	RPS29
0	0.563989	0.281	0.085	0	γδ T cells	KLRC1
0	0.544539	0.42	0.167	0	γδ T cells	FAM102A
0	0.512705	0.966	0.921	0	γδ T cells	RPL30
0	0.507714	0.969	0.929	0	γδ T cells	RPL41
1.62938e-303	0.599337	0.933	0.811	5.73867e-299	γδ T cells	BTG1
1.31235e-297	0.784887	0.726	0.501	4.62208e-293	γδ T cells	SLC2A3
3.71489e-297	0.780716	0.392	0.175	1.30838e-292	γδ T cells	DUSP2
3.76737e-293	0.44451	0.964	0.91	1.32687e-288	γδ T cells	RPS14
8.54598e-288	0.472119	0.965	0.925	3.00989e-283	γδ T cells	RPS8
2.56502e-287	0.722378	0.755	0.519	9.03399e-283	γδ T cells	FAM129A
3.11887e-287	0.486636	0.969	0.94	1.09847e-282	γδ T cells	RPS19
1.66872e-283	0.690591	0.555	0.309	5.87722e-279	γδ T cells	HNRNPLL
2.02521e-283	0.831338	0.876	0.744	7.1328e-279	γδ T cells	ZFP36L2
3.48612e-283	0.635283	0.604	0.347	1.22781e-278	γδ T cells	GZMK
2.52047e-281	0.8374	0.49	0.258	8.87708e-277	γδ T cells	NRIP1
4.36441e-279	0.779088	0.829	0.651	1.53715e-274	γδ T cells	JUN
1.08798e-278	0.55782	0.637	0.373	3.83186e-274	γδ T cells	MPZL3
5.34064e-276	0.587662	0.442	0.205	1.88097e-271	γδ T cells	ITGA1
1.94999e-273	0.681885	0.368	0.164	6.86786e-269	γδ T cells	TNF
2.41969e-272	0.785288	0.919	0.822	8.52213e-268	γδ T cells	ID2
2.55406e-272	0.65554	0.499	0.27	8.99539e-268	γδ T cells	CSRNP1
1.11899e-271	0.518923	0.388	0.173	3.94108e-267	γδ T cells	SLAMF1
3.50274e-271	0.626868	0.658	0.426	1.23367e-266	γδ T cells	GALM
8.1632e-269	0.837453	0.734	0.547	2.87508e-264	γδ T cells	PRDX6
1.38746e-265	0.750789	0.457	0.239	4.88663e-261	γδ T cells	MAP3K8
2.03182e-265	0.44669	0.303	0.121	7.15609e-261	γδ T cells	IL18R1
1.18122e-261	0.485376	0.965	0.923	4.16025e-257	γδ T cells	RPS12
4.94696e-258	0.489273	0.948	0.872	1.74232e-253	γδ T cells	RPL10A
1.68259e-256	0.489386	0.947	0.869	5.92608e-252	γδ T cells	RPS13
2.05588e-254	0.774254	0.533	0.302	7.24081e-250	γδ T cells	IL12RB2
5.9877e-250	0.443286	0.967	0.919	2.10887e-245	γδ T cells	RPS7
4.56305e-249	0.601833	0.514	0.292	1.60711e-244	γδ T cells	NFKBIZ
2.74537e-246	0.477932	0.258	0.098	9.66918e-242	γδ T cells	MICU3
1.39859e-244	0.556018	0.962	0.9	4.92584e-240	γδ T cells	JUND
1.08625e-243	0.493204	0.847	0.681	3.82577e-239	γδ T cells	EEF1A1
5.0078e-243	0.570525	0.594	0.366	1.76375e-238	γδ T cells	SIK1
6.52911e-243	0.59224	0.535	0.315	2.29955e-238	γδ T cells	DUSP5
1.78523e-242	0.42046	0.264	0.102	6.28758e-238	γδ T cells	SETD7
2.97875e-242	0.525255	0.294	0.12	1.04912e-237	γδ T cells	CD28
1.51544e-241	0.545856	0.462	0.257	5.33737e-237	γδ T cells	CERK
3.51785e-241	0.463811	0.955	0.886	1.23899e-236	γδ T cells	RPS28
2.64048e-238	0.430567	0.961	0.9	9.29976e-234	γδ T cells	RPS26
3.04212e-238	0.630408	0.857	0.702	1.07144e-233	γδ T cells	HSPA5
5.98575e-236	0.500966	0.913	0.788	2.10818e-231	γδ T cells	PNRC1
6.35253e-236	0.689904	0.599	0.382	2.23736e-231	γδ T cells	GADD45B
1.25146e-233	0.473384	0.947	0.867	4.40763e-229	γδ T cells	RPL24
4.08186e-231	0.794951	0.56	0.336	1.43763e-226	γδ T cells	ICOS
4.07532e-229	0.660547	0.559	0.341	1.43533e-224	γδ T cells	TOB1
6.37069e-229	0.523389	0.989	0.948	2.24376e-224	γδ T cells	LOC708686
2.6379e-228	0.839793	0.573	0.378	9.29068e-224	γδ T cells	AOPEP
7.61597e-228	0.705032	0.851	0.714	2.68234e-223	γδ T cells	ZFP36
2.16633e-226	0.408144	0.963	0.919	7.62982e-222	γδ T cells	RPS9
3.34405e-225	0.4938	0.948	0.882	1.17777e-220	γδ T cells	RPS4X
1.39205e-223	0.454459	0.944	0.857	4.9028e-219	γδ T cells	HSP90AB1
8.04456e-222	0.403114	0.964	0.914	2.8333e-217	γδ T cells	RPS16
6.95804e-221	0.97251	0.641	0.447	2.45062e-216	γδ T cells	TUBA4A
6.93825e-220	0.734678	0.677	0.484	2.44365e-215	γδ T cells	NFKB1
3.88222e-218	0.461833	0.952	0.882	1.36732e-213	γδ T cells	RPL23A
1.36831e-217	0.507022	0.907	0.796	4.8192e-213	γδ T cells	PABPC1
1.51756e-216	0.539499	0.649	0.437	5.34484e-212	γδ T cells	USP36
2.52772e-213	0.556912	0.844	0.689	8.90264e-209	γδ T cells	RGCC
4.01325e-213	0.435362	0.866	0.708	1.41347e-208	γδ T cells	NDFIP1
4.47127e-213	0.527596	0.878	0.738	1.57478e-208	γδ T cells	RPL14
1.01093e-211	0.479428	0.869	0.719	3.56049e-207	γδ T cells	TENT5C
1.58597e-211	0.405341	0.964	0.914	5.58578e-207	γδ T cells	RPS10
5.46074e-211	0.471754	0.377	0.192	1.92327e-206	γδ T cells	GRAMD4
9.42134e-208	0.399046	0.96	0.917	3.3182e-203	γδ T cells	RPL18
2.70357e-207	0.457428	0.754	0.55	9.52197e-203	γδ T cells	PLAAT3
4.18641e-207	0.582406	0.413	0.211	1.47445e-202	γδ T cells	ARHGAP10
1.047e-205	0.453462	0.968	0.909	3.68752e-201	γδ T cells	RPS21
6.46364e-205	0.391063	0.975	0.948	2.27649e-200	γδ T cells	RPS18
9.03695e-205	0.437588	0.951	0.875	3.18281e-200	γδ T cells	RPL34
2.21671e-204	0.432643	0.952	0.892	7.80727e-200	γδ T cells	RPL28
3.54119e-204	0.477535	0.678	0.476	1.24721e-199	γδ T cells	PER1
1.28963e-203	0.547223	0.764	0.587	4.54209e-199	γδ T cells	TNFAIP8
3.12863e-202	0.395476	0.959	0.91	1.10191e-197	γδ T cells	RPS23
9.67858e-201	0.440061	0.946	0.867	3.40879e-196	γδ T cells	RPLP0
1.23571e-198	0.471035	0.387	0.198	4.35217e-194	γδ T cells	TNFRSF10D
1.58113e-198	1.00255	0.287	0.129	5.56873e-194	γδ T cells	RRAD
5.37179e-198	0.506113	0.885	0.755	1.89194e-193	γδ T cells	KEG06-p04
3.89241e-197	0.547323	0.635	0.435	1.37091e-192	γδ T cells	BTG2
8.34606e-194	0.570128	0.631	0.429	2.93948e-189	γδ T cells	SFMBT2
3.19889e-193	0.436379	0.275	0.122	1.12665e-188	γδ T cells	ZC3H12A
4.42529e-193	0.419711	0.984	0.943	1.55859e-188	γδ T cells	KEG06-p13
1.81047e-192	0.392371	0.963	0.911	6.37649e-188	γδ T cells	RPS27A-1
2.25429e-192	0.515277	0.466	0.272	7.93962e-188	γδ T cells	MSRA
1.55947e-191	0.511178	0.921	0.822	5.49246e-187	γδ T cells	EZR
2.78308e-191	0.358008	0.31	0.142	9.80202e-187	γδ T cells	TCF7
4.77778e-191	0.402784	0.958	0.903	1.68273e-186	γδ T cells	RPL11
2.82909e-190	0.475043	0.629	0.407	9.96406e-186	γδ T cells	ZEB1
1.12579e-189	0.433462	0.953	0.881	3.96502e-185	γδ T cells	LOC703455
3.14036e-188	0.629617	0.499	0.298	1.10604e-183	γδ T cells	BACH2
6.24122e-188	0.546255	0.615	0.433	2.19816e-183	γδ T cells	LPXN
1.15579e-185	0.389084	0.943	0.875	4.07068e-181	γδ T cells	RPL12
7.53315e-184	0.383026	0.971	0.928	2.65318e-179	γδ T cells	RPL10
2.17227e-183	0.374372	0.944	0.866	7.65072e-179	γδ T cells	RPL9
4.96092e-183	0.429883	0.583	0.373	1.74724e-178	γδ T cells	LOC716034
8.70092e-183	0.553973	0.729	0.567	3.06446e-178	γδ T cells	HSP90B1
6.52992e-181	0.425656	0.918	0.828	2.29984e-176	γδ T cells	EEF1B2
8.14129e-181	0.349847	0.957	0.901	2.86736e-176	γδ T cells	RPLP2
2.42525e-180	0.421117	0.332	0.168	8.54173e-176	γδ T cells	LOC106994447
4.37807e-180	0.575705	0.77	0.61	1.54196e-175	γδ T cells	JUNB
3.42793e-179	0.576441	0.751	0.595	1.20732e-174	γδ T cells	SQSTM1
1.23476e-177	0.366381	0.952	0.901	4.34883e-173	γδ T cells	RPS5
1.28129e-177	0.421579	0.266	0.117	4.5127e-173	γδ T cells	ADAM19
1.42014e-177	0.467281	0.877	0.698	5.00173e-173	γδ T cells	LOC697476
5.71433e-173	0.492155	0.541	0.347	2.01259e-168	γδ T cells	LMBR1
1.71971e-171	0.383563	0.947	0.871	6.0568e-167	γδ T cells	RPL22
8.62133e-169	0.545785	0.721	0.555	3.03643e-164	γδ T cells	BHLHE40
2.81599e-168	0.560801	0.616	0.451	9.9179e-164	γδ T cells	HNRNPA0
5.42025e-166	0.518815	0.875	0.752	1.90901e-161	γδ T cells	DENND4A
1.53754e-165	0.444528	0.353	0.19	5.41522e-161	γδ T cells	KEG06-p02
7.10053e-164	0.39892	0.385	0.207	2.50081e-159	γδ T cells	ITGA6
1.77201e-163	0.431316	0.934	0.848	6.24102e-159	γδ T cells	RPL36
1.38571e-161	0.443705	0.886	0.781	4.88049e-157	γδ T cells	SRSF7
4.67462e-159	0.454254	0.416	0.244	1.6464e-154	γδ T cells	FOSL2
5.19964e-159	0.343111	0.954	0.894	1.83131e-154	γδ T cells	RPL7A
5.7645e-159	0.435019	0.478	0.297	2.03026e-154	γδ T cells	RAB11FIP1
2.5658e-158	0.407605	0.389	0.224	9.03674e-154	γδ T cells	SH2D2A
1.00008e-157	0.46663	0.966	0.912	3.52228e-153	γδ T cells	EIF1
1.15196e-156	0.617677	0.75	0.61	4.0572e-152	γδ T cells	LOC114674108
1.8482e-155	0.448425	0.345	0.184	6.50935e-151	γδ T cells	CRIM1
8.88581e-155	0.55321	0.435	0.259	3.12958e-150	γδ T cells	ATF3
4.34454e-154	0.406281	0.81	0.674	1.53015e-149	γδ T cells	SRSF3
1.87773e-153	0.298835	0.972	0.946	6.61335e-149	γδ T cells	RPL13
2.72724e-153	0.44771	0.741	0.583	9.60534e-149	γδ T cells	ARF4
1.64462e-152	0.39185	0.4	0.228	5.79236e-148	γδ T cells	ZNF618
3.03284e-152	0.466078	0.413	0.242	1.06817e-147	γδ T cells	PTGER4
4.60681e-152	0.392099	0.819	0.681	1.62252e-147	γδ T cells	GOLGA4
6.21886e-152	0.334542	0.958	0.903	2.19028e-147	γδ T cells	RPS11
5.06276e-151	0.46196	0.571	0.404	1.7831e-146	γδ T cells	SERP1
1.14163e-150	0.499772	0.457	0.287	4.02084e-146	γδ T cells	CCDC97
2.85443e-150	0.430541	0.914	0.813	1.00533e-145	γδ T cells	RPS24
4.5976e-150	0.451099	0.358	0.2	1.61927e-145	γδ T cells	ZNF331
4.01146e-149	0.349801	0.938	0.864	1.41284e-144	γδ T cells	RPL15
5.01268e-149	0.408484	0.419	0.253	1.76547e-144	γδ T cells	PDCD4
5.65247e-148	0.373578	0.386	0.222	1.9908e-143	γδ T cells	SLC15A4
2.53062e-147	0.369434	0.742	0.543	8.91286e-143	γδ T cells	MPP7
4.20661e-147	0.319819	0.957	0.898	1.48157e-142	γδ T cells	RPL27A
5.45661e-147	0.407212	0.397	0.234	1.92182e-142	γδ T cells	IFFO2
1.13324e-145	0.410663	0.866	0.742	3.99126e-141	γδ T cells	SARAF
4.60065e-145	0.413608	0.789	0.631	1.62035e-140	γδ T cells	PDE7A
1.19547e-143	0.385992	0.43	0.252	4.21044e-139	γδ T cells	SIPA1L2
1.43531e-141	0.598931	0.719	0.568	5.05517e-137	γδ T cells	FTH1
2.49068e-140	0.457145	0.792	0.656	8.77218e-136	γδ T cells	YPEL5
4.37366e-140	0.50483	0.374	0.215	1.5404e-135	γδ T cells	NR4A3
1.80515e-139	0.378005	0.994	0.98	6.35772e-135	γδ T cells	KEG06-p10
2.01301e-139	0.450507	0.265	0.132	7.08983e-135	γδ T cells	LOC106996136
1.14819e-138	0.68135	0.553	0.392	4.04393e-134	γδ T cells	ADAM23
3.83923e-138	0.324052	0.958	0.917	1.35218e-133	γδ T cells	RPL3
7.88329e-138	0.3636	0.619	0.439	2.7765e-133	γδ T cells	RPL22L1
2.21291e-137	0.415301	0.675	0.521	7.79389e-133	γδ T cells	CLINT1
3.6413e-137	0.490147	0.51	0.341	1.28246e-132	γδ T cells	NF1
3.64522e-137	0.38841	0.775	0.636	1.28385e-132	γδ T cells	NPM1
1.3192e-136	0.393587	0.818	0.691	4.64623e-132	γδ T cells	SFPQ
5.01522e-136	0.33375	0.964	0.909	1.76636e-131	γδ T cells	RPSA
2.73173e-135	0.441816	0.944	0.887	9.62117e-131	γδ T cells	CD44
4.91248e-134	0.367334	0.807	0.682	1.73018e-129	γδ T cells	FUS
7.10343e-134	0.576345	0.683	0.565	2.50183e-129	γδ T cells	RBMS1
7.83937e-133	0.409999	0.467	0.301	2.76103e-128	γδ T cells	NABP1
1.09669e-131	0.39302	0.451	0.291	3.86253e-127	γδ T cells	LEPROTL1
1.49172e-131	0.384535	0.834	0.718	5.25384e-127	γδ T cells	RAB8B
3.85544e-130	0.319225	0.953	0.895	1.35789e-125	γδ T cells	RPL6
1.2802e-129	0.466712	0.658	0.51	4.50888e-125	γδ T cells	CREM
1.3382e-129	0.380003	0.858	0.746	4.71314e-125	γδ T cells	DDX3X
1.52519e-129	0.316313	0.948	0.887	5.37172e-125	γδ T cells	RPL27
6.02272e-129	0.394471	0.762	0.624	2.1212e-124	γδ T cells	REL
4.69685e-128	0.359224	0.36	0.209	1.65423e-123	γδ T cells	FBXW8
9.38311e-128	0.294228	0.942	0.874	3.30473e-123	γδ T cells	NACA
1.08254e-127	0.401062	0.426	0.268	3.81272e-123	γδ T cells	SLC7A5
4.13057e-127	0.483293	0.277	0.146	1.45479e-122	γδ T cells	KEG06-t18
5.22819e-127	0.377692	0.873	0.77	1.84137e-122	γδ T cells	SRSF5
8.65285e-126	0.403178	0.814	0.675	3.04753e-121	γδ T cells	RPL32
1.66789e-125	0.45851	0.767	0.633	5.87432e-121	γδ T cells	NR4A2
1.88421e-125	0.3303	0.947	0.881	6.6362e-121	γδ T cells	RPL38
2.70353e-125	0.352662	0.934	0.854	9.52182e-121	γδ T cells	RPL37A-1
4.71522e-125	0.364665	0.927	0.839	1.6607e-120	γδ T cells	RPL35A
4.8072e-124	0.357711	0.873	0.765	1.69309e-119	γδ T cells	MGAT5
2.0037e-123	0.556751	0.346	0.209	7.05703e-119	γδ T cells	DUSP16
4.8936e-123	0.357656	0.37	0.221	1.72353e-118	γδ T cells	IER5
6.99324e-123	0.300111	0.971	0.925	2.46302e-118	γδ T cells	SIK3
3.71632e-122	0.40296	0.416	0.265	1.30889e-117	γδ T cells	ARL5B
3.2355e-121	0.368907	0.529	0.352	1.13954e-116	γδ T cells	GPRIN3
1.50961e-120	0.370837	0.977	0.939	5.31685e-116	γδ T cells	EML4
8.73482e-120	0.396253	0.494	0.342	3.0764e-115	γδ T cells	ZFAND5
9.60596e-120	0.446946	0.429	0.272	3.38322e-115	γδ T cells	KEG06-p05
3.64419e-118	0.410997	0.423	0.27	1.28349e-113	γδ T cells	PRMT9
4.65758e-118	0.378029	0.333	0.196	1.6404e-113	γδ T cells	UGCG
1.09233e-117	0.461507	0.959	0.921	3.84717e-113	γδ T cells	KEG06-r02
1.20376e-115	0.296966	0.91	0.815	4.23965e-111	γδ T cells	TOMM7
6.00437e-114	0.357733	0.475	0.321	2.11474e-109	γδ T cells	CUTA
6.99717e-114	0.367751	0.871	0.758	2.4644e-109	γδ T cells	RPS25
4.19684e-112	0.445621	0.562	0.426	1.47813e-107	γδ T cells	RHOF
3.5053e-111	0.399711	0.748	0.614	1.23457e-106	γδ T cells	DIP2B
1.33559e-110	0.268336	0.959	0.911	4.70393e-106	γδ T cells	RPL8
5.28211e-110	0.365099	0.789	0.655	1.86036e-105	γδ T cells	BICDL1
3.40859e-109	0.275579	0.938	0.873	1.20051e-104	γδ T cells	RPL23
6.48986e-109	0.336473	0.885	0.794	2.28573e-104	γδ T cells	ARIH1
1.90446e-107	0.287527	0.888	0.786	6.70749e-103	γδ T cells	NME2
5.95842e-107	0.406486	0.772	0.654	2.09855e-102	γδ T cells	GLS
1.3685e-106	0.297652	0.323	0.181	4.81986e-102	γδ T cells	ANK3
4.19658e-106	0.308509	0.952	0.898	1.47804e-101	γδ T cells	RPL19
7.63293e-106	0.4244	0.647	0.513	2.68832e-101	γδ T cells	RPL39
1.5345e-105	0.329788	0.342	0.205	5.40451e-101	γδ T cells	IFNAR2
3.67429e-105	0.297132	0.263	0.145	1.29409e-100	γδ T cells	GPR171
3.72388e-104	0.285162	0.342	0.203	1.31155e-99	γδ T cells	DENND3
6.17464e-104	0.339212	0.894	0.821	2.17471e-99	γδ T cells	KMT2E
2.29701e-103	0.492111	0.872	0.815	8.09007e-99	γδ T cells	ADGRE5
4.03056e-103	0.384887	0.707	0.579	1.41956e-98	γδ T cells	TUT4
6.17768e-103	0.388416	0.938	0.865	2.17578e-98	γδ T cells	VIM
6.95149e-103	0.348453	0.857	0.756	2.44831e-98	γδ T cells	MAMU-A3
8.5035e-103	0.293201	0.268	0.148	2.99493e-98	γδ T cells	SLC35E1
1.8803e-102	0.468946	0.332	0.21	6.6224e-98	γδ T cells	TATDN2
2.52748e-102	0.477547	0.559	0.414	8.9018e-98	γδ T cells	ZSWIM4
1.96756e-101	0.322423	0.862	0.781	6.92976e-97	γδ T cells	HNRNPC
5.08134e-100	0.269277	0.258	0.144	1.78965e-95	γδ T cells	PDIA4
1.07906e-99	0.283541	0.873	0.759	3.80043e-95	γδ T cells	EEF1G
1.49703e-99	0.343083	0.426	0.282	5.27254e-95	γδ T cells	SOCS1
2.68958e-99	0.272414	0.952	0.887	9.47268e-95	γδ T cells	RPL5
7.25494e-99	0.3847	0.676	0.546	2.55519e-94	γδ T cells	LOC107000401
8.18475e-99	0.338702	0.839	0.719	2.88267e-94	γδ T cells	LOC703365
1.9057e-98	0.342922	0.677	0.528	6.71187e-94	γδ T cells	MAMU-A
4.21033e-98	0.527037	0.543	0.42	1.48288e-93	γδ T cells	SERTAD1
1.96008e-97	0.369484	0.578	0.432	6.90339e-93	γδ T cells	IFRD1
4.97424e-97	0.282232	1	0.998	1.75193e-92	γδ T cells	KEG06-r01
1.10528e-96	0.309264	0.343	0.213	3.89278e-92	γδ T cells	MGAT4A
3.50107e-95	0.325302	0.798	0.702	1.23308e-90	γδ T cells	PAK2
3.75956e-95	0.332613	0.748	0.627	1.32412e-90	γδ T cells	EIF5
5.18847e-95	0.337172	0.592	0.457	1.82738e-90	γδ T cells	SPTAN1
4.74782e-94	0.319119	0.364	0.231	1.67218e-89	γδ T cells	KLHL6
1.31808e-93	0.349513	0.578	0.432	4.64227e-89	γδ T cells	LOC114674016
2.01917e-93	0.302901	0.818	0.717	7.1115e-89	γδ T cells	GPBP1
2.17796e-93	0.458761	0.564	0.414	7.67077e-89	γδ T cells	IMMP2L
3.09879e-93	0.384395	0.657	0.53	1.09139e-88	γδ T cells	N4BP1
3.60651e-93	0.290181	0.466	0.324	1.27021e-88	γδ T cells	LOC696998
3.41497e-91	0.272932	0.89	0.8	1.20275e-86	γδ T cells	RPS17
3.48211e-91	0.309489	0.442	0.306	1.2264e-86	γδ T cells	CKLF
1.61211e-90	0.290042	0.658	0.524	5.67785e-86	γδ T cells	SEPTIN6
8.43543e-90	0.374873	0.83	0.744	2.97096e-85	γδ T cells	EPC1
2.84026e-89	0.329849	0.425	0.289	1.00034e-84	γδ T cells	GATA3
4.01494e-89	0.265247	0.942	0.879	1.41406e-84	γδ T cells	LOC712274
6.20061e-89	0.3096	0.938	0.866	2.18386e-84	γδ T cells	RPS27
6.62067e-89	0.297725	0.703	0.561	2.3318e-84	γδ T cells	BTF3
6.66639e-89	0.399875	0.652	0.527	2.3479e-84	γδ T cells	PPP1R15A
8.10187e-89	0.317763	0.354	0.227	2.85348e-84	γδ T cells	PFKFB3
2.22343e-88	0.278474	0.966	0.915	7.83094e-84	γδ T cells	STK17B
1.99783e-87	0.313486	0.7	0.568	7.03634e-83	γδ T cells	LOC716530
2.29381e-87	0.571803	0.563	0.433	8.0788e-83	γδ T cells	LOC714964
3.23593e-87	0.350779	0.555	0.425	1.13969e-82	γδ T cells	CHD4
6.78289e-87	0.359382	0.679	0.57	2.38893e-82	γδ T cells	SMAP1
8.88288e-87	0.343977	0.733	0.617	3.12855e-82	γδ T cells	RPS6KA3
1.97256e-86	0.414383	0.952	0.904	6.94737e-82	γδ T cells	UBC
7.17399e-86	0.329446	0.338	0.222	2.52668e-81	γδ T cells	FBXO7
8.18062e-86	0.27183	0.931	0.853	2.88122e-81	γδ T cells	RPL17
1.0286e-85	0.295662	0.468	0.326	3.62272e-81	γδ T cells	SESN1
2.18132e-85	0.288882	0.35	0.224	7.68262e-81	γδ T cells	MAN1C1
2.03722e-84	0.337109	0.444	0.319	7.17509e-80	γδ T cells	UBE2J1
6.43633e-84	0.264212	0.293	0.18	2.26688e-79	γδ T cells	SMCO4
8.02955e-84	0.316583	0.374	0.248	2.82801e-79	γδ T cells	EHD4
2.76287e-83	0.309118	0.45	0.326	9.73082e-79	γδ T cells	HDLBP
3.52199e-83	0.298589	0.712	0.587	1.24044e-78	γδ T cells	ASAP1
8.62113e-83	0.27159	0.48	0.341	3.03636e-78	γδ T cells	KCNA3
3.01791e-82	0.4163	0.478	0.349	1.06291e-77	γδ T cells	ELL2
1.28592e-81	0.289393	0.549	0.419	4.52902e-77	γδ T cells	PBXIP1
1.59423e-81	0.359557	0.452	0.32	5.61487e-77	γδ T cells	CD83
7.21964e-79	0.330771	0.65	0.529	2.54276e-74	γδ T cells	SRSF2
2.01805e-78	0.321056	0.698	0.585	7.10758e-74	γδ T cells	RPL29
8.77969e-78	0.324051	0.596	0.474	3.09221e-73	γδ T cells	PCGF5
5.96746e-77	0.320624	0.45	0.326	2.10174e-72	γδ T cells	UBE2S
2.05808e-76	0.281777	0.786	0.689	7.24855e-72	γδ T cells	TOP1
3.55648e-76	0.268139	0.306	0.196	1.25259e-71	γδ T cells	PRNP
2.41097e-75	0.402278	0.623	0.504	8.49145e-71	γδ T cells	JMY
2.41724e-75	0.33459	0.616	0.498	8.51351e-71	γδ T cells	ATP1A1
3.83648e-75	0.3153	0.598	0.472	1.35121e-70	γδ T cells	INTS6
4.37535e-75	0.294441	0.916	0.857	1.541e-70	γδ T cells	KEG06-p08
3.42751e-73	0.250157	0.503	0.366	1.20717e-68	γδ T cells	SYNE2
1.15059e-72	0.306362	0.553	0.433	4.05236e-68	γδ T cells	NCK2
1.34925e-72	0.303463	0.411	0.293	4.75206e-68	γδ T cells	LOC114677006
1.42856e-72	0.253641	0.274	0.171	5.03138e-68	γδ T cells	GNL3
3.9327e-71	0.312037	0.661	0.555	1.3851e-66	γδ T cells	NUFIP2
1.126e-70	0.292722	0.308	0.205	3.96579e-66	γδ T cells	CYCS
1.34006e-70	0.271786	0.921	0.852	4.7197e-66	γδ T cells	PARP8
8.32703e-70	0.295201	0.597	0.477	2.93278e-65	γδ T cells	EIF4A1
1.41695e-69	0.297223	0.498	0.377	4.99051e-65	γδ T cells	TMEM71
6.57593e-69	0.258511	0.275	0.171	2.31604e-64	γδ T cells	KEG06-p09
3.25544e-68	0.262455	0.269	0.17	1.14656e-63	γδ T cells	RASSF2
3.59169e-68	0.340707	0.437	0.323	1.26499e-63	γδ T cells	NAMPT
8.43602e-68	0.314982	0.393	0.287	2.97117e-63	γδ T cells	FDX1
1.32515e-67	0.347579	0.51	0.389	4.66719e-63	γδ T cells	RASGEF1B
2.0643e-66	0.255585	0.258	0.16	7.27045e-62	γδ T cells	KIAA0355
2.29952e-66	0.251263	0.803	0.691	8.09893e-62	γδ T cells	LOC106998836
2.43759e-66	0.322239	0.647	0.524	8.58521e-62	γδ T cells	LOC708994
5.94616e-66	0.289972	0.657	0.547	2.09424e-61	γδ T cells	AFF1
1.21866e-65	0.257714	0.814	0.722	4.29214e-61	γδ T cells	NCL
2.88038e-65	0.269795	0.287	0.189	1.01447e-60	γδ T cells	ARL3
4.1077e-65	0.281593	0.688	0.58	1.44673e-60	γδ T cells	HNRNPA1
6.2624e-65	0.296687	0.741	0.642	2.20562e-60	γδ T cells	MCL1
1.02471e-64	0.266112	0.375	0.266	3.60904e-60	γδ T cells	IRF2BP2
2.97723e-64	0.276805	0.688	0.58	1.04858e-59	γδ T cells	CHD1
5.08323e-63	0.256058	0.49	0.381	1.79031e-58	γδ T cells	ELK3
5.1356e-63	0.289722	0.368	0.26	1.80876e-58	γδ T cells	HIF1A
6.47319e-63	0.279014	0.733	0.628	2.27986e-58	γδ T cells	RERE
4.22706e-62	0.262001	0.346	0.241	1.48877e-57	γδ T cells	HPCAL1
2.1742e-61	0.390946	0.651	0.556	7.65753e-57	γδ T cells	IRF1
1.36858e-60	0.335335	0.56	0.457	4.82013e-56	γδ T cells	CARD11
6.83238e-60	0.31547	0.525	0.418	2.40636e-55	γδ T cells	CDYL
4.06766e-59	0.25527	0.251	0.163	1.43263e-54	γδ T cells	NXT1
6.96321e-59	0.321954	0.537	0.434	2.45244e-54	γδ T cells	HERPUD1
1.10847e-58	0.260899	0.773	0.687	3.90403e-54	γδ T cells	DNAJB6
1.97163e-58	0.260051	0.353	0.248	6.94408e-54	γδ T cells	SKIL
4.30249e-58	0.303323	0.314	0.218	1.51534e-53	γδ T cells	LOC114679035
6.0974e-58	0.344189	0.328	0.228	2.1475e-53	γδ T cells	CSF1
2.68424e-57	0.504388	0.298	0.212	9.45389e-53	γδ T cells	GADD45A
7.57686e-57	0.286806	0.397	0.296	2.66857e-52	γδ T cells	MRPL10
6.27621e-56	0.261576	0.558	0.454	2.21048e-51	γδ T cells	ATF4
7.10141e-56	0.284209	0.65	0.55	2.50112e-51	γδ T cells	KEG06-p06
8.38234e-56	0.260854	0.914	0.853	2.95226e-51	γδ T cells	SYTL3
1.56884e-55	0.262102	0.756	0.68	5.52545e-51	γδ T cells	PTPN1
2.08637e-55	0.264789	0.681	0.589	7.34818e-51	γδ T cells	BRD2
8.84446e-55	0.254799	0.471	0.364	3.11502e-50	γδ T cells	SLC23A2
3.71275e-54	0.266133	0.313	0.219	1.30763e-49	γδ T cells	GABARAPL1
4.28535e-54	0.267851	0.451	0.349	1.5093e-49	γδ T cells	DDX21
4.61001e-54	0.300819	0.364	0.263	1.62364e-49	γδ T cells	SLC35D1
4.7987e-54	0.266504	0.454	0.35	1.6901e-49	γδ T cells	B4GALT1
2.36008e-53	0.270896	0.322	0.229	8.31218e-49	γδ T cells	PBX4
2.77543e-52	0.267896	0.486	0.389	9.77508e-48	γδ T cells	C10H20orf24
6.74005e-52	0.261245	0.479	0.381	2.37385e-47	γδ T cells	USP12
6.02985e-51	0.346974	0.491	0.392	2.12371e-46	γδ T cells	BCL2A1
1.56756e-50	0.278573	0.596	0.484	5.52095e-46	γδ T cells	MAML2
1.63158e-50	0.258682	0.684	0.594	5.74643e-46	γδ T cells	HNRNPUL1
1.85675e-50	0.259496	0.3	0.207	6.53949e-46	γδ T cells	PDE8A
2.01299e-50	0.275502	0.562	0.464	7.08976e-46	γδ T cells	RNF19A
8.95762e-50	0.277119	0.395	0.3	3.15488e-45	γδ T cells	MAP2K1
5.16934e-47	0.265808	0.922	0.888	1.82064e-42	γδ T cells	TGFB1
4.38913e-46	0.251627	0.528	0.443	1.54585e-41	γδ T cells	RASSF5
3.54986e-45	0.334624	0.38	0.286	1.25026e-40	γδ T cells	AHR
4.4486e-43	0.305154	0.742	0.681	1.5668e-38	γδ T cells	ARL4C
3.32365e-42	0.269363	0.566	0.479	1.17059e-37	γδ T cells	YAF2
4.33397e-42	0.275113	0.25	0.173	1.52642e-37	γδ T cells	RGS2
7.63862e-42	0.254244	0.438	0.348	2.69032e-37	γδ T cells	RNF19B
1.92925e-40	0.362846	0.587	0.518	6.79481e-36	γδ T cells	IFI6
2.19059e-38	0.263544	0.45	0.363	7.71525e-34	γδ T cells	LOC107000013
2.57343e-37	0.253319	0.452	0.369	9.06361e-33	γδ T cells	USP37
6.50179e-36	0.259884	0.754	0.692	2.28993e-31	γδ T cells	CPD
1.5246e-35	0.253331	0.6	0.523	5.36965e-31	γδ T cells	REV3L
3.85862e-31	0.333837	0.788	0.711	1.35901e-26	γδ T cells	RPL37
7.02179e-16	0.319732	0.286	0.237	2.47307e-11	γδ T cells	HDAC9
0	3.16679	0.859	0.194	0	Proliferating	STMN1
0	2.88991	0.695	0.133	0	Proliferating	LOC114677671
0	2.76157	0.809	0.053	0	Proliferating	MKI67
0	2.64189	0.796	0.201	0	Proliferating	LOC114673461
0	2.58662	0.918	0.445	0	Proliferating	HMGB2
0	2.58134	0.747	0.196	0	Proliferating	HIST1H1D
0	2.08739	0.816	0.326	0	Proliferating	TUBB
0	2.05385	0.883	0.559	0	Proliferating	TUBA1B
0	1.88963	0.627	0.018	0	Proliferating	DIAPH3
0	1.87799	0.723	0.317	0	Proliferating	GZMA
0	1.84951	0.576	0.037	0	Proliferating	TOP2A
0	1.72331	0.566	0.025	0	Proliferating	RRM2
0	1.69275	0.585	0.011	0	Proliferating	PCLAF
0	1.66441	0.486	0.01	0	Proliferating	ASPM
0	1.65867	0.497	0.025	0	Proliferating	HIST1H1B
0	1.62043	0.819	0.564	0	Proliferating	H2AFZ
0	1.61101	0.829	0.346	0	Proliferating	SMC4
0	1.52893	0.816	0.347	0	Proliferating	ADORA2B
0	1.52472	0.606	0.044	0	Proliferating	CENPP
0	1.47861	0.603	0.16	0	Proliferating	LAMP3
0	1.46366	0.547	0.027	0	Proliferating	CIT
0	1.45396	0.52	0.083	0	Proliferating	LOC114678430
0	1.45095	0.541	0.024	0	Proliferating	NUSAP1
0	1.41183	0.661	0.179	0	Proliferating	CKS2
0	1.38084	0.783	0.276	0	Proliferating	TMPO
0	1.37593	0.832	0.36	0	Proliferating	C11H12orf75
0	1.37165	0.893	0.667	0	Proliferating	LOC705636
0	1.36919	0.691	0.225	0	Proliferating	PCNA
0	1.36678	0.545	0.021	0	Proliferating	KIF11
0	1.36418	0.692	0.182	0	Proliferating	ATAD2
0	1.36175	0.649	0.056	0	Proliferating	SMC2
0	1.33764	0.774	0.416	0	Proliferating	RAN
0	1.33748	0.865	0.489	0	Proliferating	ANP32B
0	1.32814	0.637	0.326	0	Proliferating	HIST2H2AC
0	1.31989	0.716	0.144	0	Proliferating	LMNB1
0	1.30123	0.697	0.292	0	Proliferating	DUT
0	1.29932	0.62	0.196	0	Proliferating	CENPF
0	1.29347	0.484	0.18	0	Proliferating	PLAC8
0	1.28631	0.523	0.048	0	Proliferating	CENPE
0	1.28222	0.478	0.011	0	Proliferating	TYMS
0	1.27494	0.526	0.008	0	Proliferating	SPC25
0	1.26623	0.949	0.877	0	Proliferating	ACTG1
0	1.26612	0.605	0.119	0	Proliferating	POLA1
0	1.26209	0.898	0.685	0	Proliferating	HMGB1
0	1.25796	0.783	0.464	0	Proliferating	SNRPB
0	1.24448	0.48	0.078	0	Proliferating	LOC701826
0	1.24167	0.717	0.347	0	Proliferating	LOC696005
0	1.22861	0.568	0.085	0	Proliferating	RFC3
0	1.2063	0.838	0.362	0	Proliferating	LOC114673210
0	1.2042	0.735	0.4	0	Proliferating	LOC696872
0	1.19469	0.743	0.307	0	Proliferating	CALM3
0	1.19153	0.822	0.366	0	Proliferating	LOC106996415
0	1.19107	0.522	0.021	0	Proliferating	BRCA2
0	1.18037	0.506	0.014	0	Proliferating	KIF15
0	1.17791	0.704	0.22	0	Proliferating	NSD2
0	1.17522	0.85	0.454	0	Proliferating	DEK
0	1.1731	0.87	0.593	0	Proliferating	ENO1
0	1.17234	0.568	0.058	0	Proliferating	MCM7
0	1.1645	0.552	0.056	0	Proliferating	KNL1
0	1.16052	0.952	0.715	0	Proliferating	GZMB
0	1.15685	0.712	0.411	0	Proliferating	SLC25A5
0	1.15225	0.596	0.056	0	Proliferating	NCAPG2
0	1.15141	0.483	0.025	0	Proliferating	CDK1
0	1.12725	0.621	0.101	0	Proliferating	FANCI
0	1.12371	0.526	0.09	0	Proliferating	CKS1B
0	1.12318	0.693	0.324	0	Proliferating	WWOX
0	1.12008	0.864	0.527	0	Proliferating	NUCKS1
0	1.11416	0.65	0.282	0	Proliferating	RPA3
0	1.10508	0.599	0.11	0	Proliferating	TACC3
0	1.10011	0.573	0.079	0	Proliferating	BRCA1
0	1.09246	0.441	0.008	0	Proliferating	DLGAP5
0	1.09156	0.795	0.411	0	Proliferating	UCP2
0	1.08079	0.724	0.239	0	Proliferating	DNMT1
0	1.07651	0.499	0.015	0	Proliferating	NUF2
0	1.0707	0.615	0.16	0	Proliferating	HELLS
0	1.06757	0.458	0.071	0	Proliferating	LOC704341
0	1.06665	0.48	0.018	0	Proliferating	CENPW
0	1.05772	0.76	0.303	0	Proliferating	EZH2
0	1.05522	0.554	0.056	0	Proliferating	ITGB3BP
0	1.05207	0.497	0.031	0	Proliferating	NCAPG
0	1.05041	0.556	0.17	0	Proliferating	H2AFX
0	1.04787	0.515	0.018	0	Proliferating	KNTC1
0	1.04373	0.467	0.022	0	Proliferating	DTL
0	1.03051	0.548	0.196	0	Proliferating	PTTG1
0	1.02956	0.473	0.012	0	Proliferating	CLSPN
0	1.02718	0.797	0.582	0	Proliferating	PSMB9
0	1.01986	0.494	0.036	0	Proliferating	TPX2
0	1.01534	0.926	0.841	0	Proliferating	PFN1
0	1.01526	0.495	0.03	0	Proliferating	MCM3
0	1.01189	0.915	0.736	0	Proliferating	CORO1A
0	1.0112	0.446	0.013	0	Proliferating	MELK
0	1.00975	0.47	0.04	0	Proliferating	BRIP1
0	0.996973	0.908	0.801	0	Proliferating	CFL1
0	0.986848	0.483	0.053	0	Proliferating	MMS22L
0	0.986801	0.513	0.054	0	Proliferating	NCAPD2
0	0.972612	0.577	0.187	0	Proliferating	SIVA1
0	0.971549	0.468	0.014	0	Proliferating	CENPM
0	0.960838	0.297	0.004	0	Proliferating	UBE2C
0	0.959612	0.926	0.781	0	Proliferating	HSPA8
0	0.953496	0.954	0.914	0	Proliferating	LOC705671
0	0.952888	0.477	0.034	0	Proliferating	POLQ
0	0.952268	0.423	0.006	0	Proliferating	BIRC5
0	0.944154	0.695	0.334	0	Proliferating	PSME2
0	0.942363	0.566	0.247	0	Proliferating	LOC706608
0	0.940254	0.42	0.014	0	Proliferating	GTSE1
0	0.939957	0.495	0.053	0	Proliferating	ATAD5
0	0.934443	0.73	0.356	0	Proliferating	IDH2
0	0.933626	0.367	0.016	0	Proliferating	LOC695427
0	0.928616	0.817	0.401	0	Proliferating	LOC106993126
0	0.925	0.41	0.019	0	Proliferating	CCNA2
0	0.919013	0.773	0.395	0	Proliferating	PPP1CA
0	0.914197	0.464	0.041	0	Proliferating	ZGRF1
0	0.914168	0.679	0.223	0	Proliferating	RNASEH2B
0	0.905923	0.383	0.011	0	Proliferating	SGO2
0	0.901304	0.963	0.92	0	Proliferating	TMSB10
0	0.896962	0.616	0.203	0	Proliferating	CD38
0	0.896937	0.436	0.009	0	Proliferating	RAD51AP1
0	0.894547	0.629	0.214	0	Proliferating	HMGN2
0	0.892904	0.424	0.016	0	Proliferating	BUB1B
0	0.887685	0.484	0.052	0	Proliferating	KIF22
0	0.885964	0.902	0.8	0	Proliferating	GAPDH
0	0.884124	0.46	0.101	0	Proliferating	LOC114679643
0	0.882889	0.688	0.266	0	Proliferating	LOC114671905
0	0.881986	0.452	0.01	0	Proliferating	CDT1
0	0.879832	0.591	0.217	0	Proliferating	RANBP1
0	0.877921	0.419	0.036	0	Proliferating	PRC1
0	0.876626	0.505	0.063	0	Proliferating	CENPO
0	0.876429	0.723	0.323	0	Proliferating	RAD51B
0	0.874793	0.709	0.285	0	Proliferating	PRIM2
0	0.87479	0.428	0.033	0	Proliferating	MCM5
0	0.872825	0.458	0.051	0	Proliferating	NDC80
0	0.868909	0.627	0.231	0	Proliferating	LSM3
0	0.851018	0.442	0.021	0	Proliferating	CENPU
0	0.843843	0.371	0.009	0	Proliferating	KIF4A
0	0.843483	0.474	0.048	0	Proliferating	CHEK1
0	0.841359	0.689	0.358	0	Proliferating	APRT
0	0.838965	0.662	0.28	0	Proliferating	FANCC
0	0.837001	0.768	0.383	0	Proliferating	LBR
0	0.836142	0.818	0.572	0	Proliferating	PSMB8
0	0.834005	0.445	0.066	0	Proliferating	FBXO5
0	0.827342	0.515	0.084	0	Proliferating	WDR76
0	0.825623	0.541	0.193	0	Proliferating	LSM2
0	0.82415	0.645	0.347	0	Proliferating	TUBB4B
0	0.817744	0.434	0.032	0	Proliferating	BARD1
0	0.817291	0.352	0.014	0	Proliferating	CDCA2
0	0.812351	0.648	0.349	0	Proliferating	SERPINB1
[truncated: 2,482 more rows]
